# Supplementary material
Source: ML conference proceedings conference paper supplement (https://openreview.net/forum?id=MSm0VFL9pq)
Supplement: supplementary_material [file area_stats.xlsx]

## Sheet: cleaned_example
	target_vsa_cosine_sim								next_token_precision@1								next_token_precision@5								next_token_softmax								target_token_rank								target_token_softmax								target_token_softmax_diff
	count	mean	std	min	25%	50%	75%	max	count	mean	std	min	25%	50%	75%	max	count	mean	std	min	25%	50%	75%	max	count	mean	std	min	25%	50%	75%	max	count	mean	std	min	25%	50%	75%	max	count	mean	std	min	25%	50%	75%	max	count
area
Semantic Relations	1	-0.81		-0.81	-0.81	-0.81	-0.81	-0.81	1	0		0	0	0	0	0	1	1		1	1	1	1	1	1	0.08		0.08	0.08	0.08	0.08	0.08	1	1		1	1	1	1	1	1	0.05		0.05	0.05	0.05	0.05	0.05	1
[truncated: 15 more columns]

## Sheet: cleaned_example_key
	target_vsa_cosine_sim								next_token_precision@1								next_token_precision@5								next_token_softmax								target_token_rank								target_token_softmax								target_token_softmax_diff
	count	mean	std	min	25%	50%	75%	max	count	mean	std	min	25%	50%	75%	max	count	mean	std	min	25%	50%	75%	max	count	mean	std	min	25%	50%	75%	max	count	mean	std	min	25%	50%	75%	max	count	mean	std	min	25%	50%	75%	max	count
area
Factual Knowledge	4	0.12	0.02	0.1	0.1	0.12	0.13	0.14	4	0	0	0	0	0	0	0	4	0.75	0.5	0	0.75	1	1	1	4	0.34	0.16	0.2	0.28	0.3	0.37	0.57	4	4.25	3.4	1	2.5	3.5	5.25	9	4	0.06	0.05	0.01	0.03	0.06	0.08	0.13	4
Semantic Relations	5	0.1	0.06	0.05	0.07	0.07	0.15	0.18	5	0	0	0	0	0	0	0	5	0.2	0.45	0	0	0	0	1	5	0.14	0.09	0.07	0.1	0.1	0.11	0.3	5	40	48.86	2	15	16	44	123	5	0.02	0.02	0	0	0.01	0.01	0.06	5
Morphological Modifiers	1	0.06		0.06	0.06	0.06	0.06	0.06	1	0		0	0	0	0	0	1	0		0	0	0	0	0	1	0.14		0.14	0.14	0.14	0.14	0.14	1	6		6	6	6	6	6	1	0.01		0.01	0.01	0.01	0.01	0.01	1
Semantic Hierarchies	59	0.06	0.01	0.05	0.05	0.06	0.06	0.07	59	0	0	0	0	0	0	0	59	0.02	0.13	0	0	0	0	1	59	0.13	0.09	0.05	0.08	0.1	0.15	0.5	59	87.58	146.97	1	16	34	69	629	59	0.01	0.02	0	0	0.01	0.01	0.1	59
Verbal & Grammatical Forms	17	0.06	0	0.05	0.05	0.06	0.06	0.06	17	0.18	0.35	0	0	0	0	1	17	0.5	0.43	0	0	0.5	1	1	17	0.17	0.08	0.06	0.13	0.17	0.21	0.37	17	33.41	59.53	0	2	6	20	195	17	0.05	0.07	0	0	0.03	0.08	0.22	17
[truncated: 15 more columns]

## Sheet: cleaned_example_value
	target_vsa_cosine_sim								next_token_precision@1								next_token_precision@5								next_token_softmax								target_token_rank								target_token_softmax								target_token_softmax_diff
	count	mean	std	min	25%	50%	75%	max	count	mean	std	min	25%	50%	75%	max	count	mean	std	min	25%	50%	75%	max	count	mean	std	min	25%	50%	75%	max	count	mean	std	min	25%	50%	75%	max	count	mean	std	min	25%	50%	75%	max	count
area
Semantic Relations	23	0.11	0.07	0.05	0.06	0.06	0.16	0.28	23	0.28	0.45	0	0	0	0.75	1	23	0.28	0.45	0	0	0	0.75	1	23	0.23	0.25	0.05	0.09	0.11	0.2	0.82	23	463.65	1364.8	0	0	15	31	5640	23	0.16	0.29	0	0.01	0.01	0.11	0.82	23
Factual Knowledge	13	0.09	0.03	0.05	0.06	0.09	0.11	0.14	13	0	0	0	0	0	0	0	13	0.62	0.51	0	0	1	1	1	13	0.16	0.14	0.07	0.09	0.11	0.17	0.59	13	25.69	59.36	1	1	2	11	216	13	0.05	0.04	0	0.02	0.06	0.08	0.12	13
Morphological Modifiers	11	0.06	0.01	0.05	0.06	0.06	0.06	0.07	11	0.27	0.47	0	0	0	0.5	1	11	0.82	0.4	0	1	1	1	1	11	0.24	0.08	0.11	0.2	0.26	0.28	0.39	11	17.82	53.18	0	0.5	1	3	178	11	0.07	0.07	0	0.02	0.03	0.09	0.26	11
Semantic Hierarchies	4	0.06	0.01	0.05	0.05	0.06	0.06	0.06	4	0	0	0	0	0	0	0	4	0.12	0.25	0	0	0	0.12	0.5	4	0.12	0.03	0.09	0.1	0.13	0.15	0.15	4	327	340.99	1	61	299	565	709	4	0.04	0.07	0	0	0	0.04	0.14	4
Verbal & Grammatical Forms	75	0.06	0.01	0.05	0.05	0.06	0.06	0.07	75	0.1	0.28	0	0	0	0	1	75	0.52	0.48	0	0	0.5	1	1	75	0.21	0.1	0.05	0.14	0.18	0.26	0.51	75	44.09	100.12	0	2	5	35.5	685	75	0.04	0.05	0	0	0.02	0.05	0.29	75
[truncated: 15 more columns]

## Sheet: cleaned_key
	target_vsa_cosine_sim								next_token_precision@1								next_token_precision@5								next_token_softmax								target_token_rank								target_token_softmax								target_token_softmax_diff
	count	mean	std	min	25%	50%	75%	max	count	mean	std	min	25%	50%	75%	max	count	mean	std	min	25%	50%	75%	max	count	mean	std	min	25%	50%	75%	max	count	mean	std	min	25%	50%	75%	max	count	mean	std	min	25%	50%	75%	max	count
area
Semantic Hierarchies	10	0.06	0	0.05	0.06	0.06	0.06	0.06	10	0	0	0	0	0	0	0	10	0.3	0.48	0	0	0	0.75	1	10	0.12	0.09	0.07	0.08	0.09	0.12	0.36	10	52.5	68.96	1	2.75	20	79.75	190	10	0.03	0.05	0	0	0.01	0.05	0.12	10
Verbal & Grammatical Forms	3	0.06	0.01	0.05	0.06	0.06	0.06	0.06	3	0.17	0.29	0	0	0	0.25	0.5	3	0.17	0.29	0	0	0	0.25	0.5	3	0.2	0.01	0.19	0.19	0.19	0.2	0.21	3	527.67	187.17	391	421	451	596	741	3	0	0	0	0	0	0	0	3
[truncated: 15 more columns]

## Sheet: cleaned_original
	target_vsa_cosine_sim								next_token_precision@1								next_token_precision@5								next_token_softmax								target_token_rank								target_token_softmax								target_token_softmax_diff
	count	mean	std	min	25%	50%	75%	max	count	mean	std	min	25%	50%	75%	max	count	mean	std	min	25%	50%	75%	max	count	mean	std	min	25%	50%	75%	max	count	mean	std	min	25%	50%	75%	max	count	mean	std	min	25%	50%	75%	max	count
area
Factual Knowledge	15	-0.53	0.13	-0.71	-0.66	-0.51	-0.4	-0.35	15	0.6	0.51	0	0	1	1	1	15	0.73	0.46	0	0.5	1	1	1	15	0.23	0.11	0.05	0.18	0.2	0.26	0.44	15	2.27	3.31	0	0	0	5	8	15	0.14	0.12	0.01	0.03	0.15	0.19	0.43	15
Semantic Relations	25	-0.81	0.04	-0.87	-0.84	-0.81	-0.79	-0.72	25	0.04	0.2	0	0	0	0	1	25	0.44	0.51	0	0	0	1	1	25	0.2	0.1	0.04	0.12	0.2	0.26	0.41	25	6.44	5.05	0	3	5	10	19	25	0.05	0.05	0.01	0.02	0.04	0.04	0.21	25
[truncated: 15 more columns]

## Sheet: context
	target_vsa_cosine_sim								next_token_precision@1								next_token_precision@5								next_token_softmax								target_token_rank								target_token_softmax								target_token_softmax_diff
	count	mean	std	min	25%	50%	75%	max	count	mean	std	min	25%	50%	75%	max	count	mean	std	min	25%	50%	75%	max	count	mean	std	min	25%	50%	75%	max	count	mean	std	min	25%	50%	75%	max	count	mean	std	min	25%	50%	75%	max	count
area
Factual Knowledge	566	0.49	0.07	0.06	0.5	0.5	0.51	0.53	566	0.77	0.37	0	0.5	1	1	1	566	0.87	0.26	0	1	1	1	1	566	0.46	0.26	0.06	0.23	0.44	0.67	0.98	566	24.27	222.93	0	0	0	0	4297	566	0.43	0.29	0	0.16	0.41	0.66	0.98	566
Morphological Modifiers	1851	0.49	0.06	0.06	0.49	0.5	0.51	0.54	1851	0.53	0.47	0	0	0.5	1	1	1851	0.72	0.39	0	0.5	1	1	1	1851	0.29	0.21	0.02	0.12	0.22	0.4	0.95	1851	10.52	70.06	0	0	0	3	1942	1851	0.22	0.22	0	0.04	0.15	0.34	0.95	1851
Verbal & Grammatical Forms	2354	0.48	0.08	0.05	0.5	0.51	0.51	0.54	2354	0.59	0.48	0	0	1	1	1	2354	0.83	0.36	0	1	1	1	1	2354	0.29	0.2	0.04	0.13	0.22	0.4	0.99	2354	7.14	37.15	0	0	0	2	818	2354	0.23	0.22	0	0.05	0.16	0.35	0.99	2354
Semantic Relations	360	0.46	0.1	0.06	0.47	0.5	0.5	0.54	360	0.57	0.46	0	0	1	1	1	360	0.68	0.43	0	0.5	1	1	1	360	0.33	0.25	0.05	0.11	0.27	0.52	0.97	360	85.61	939.45	0	0	0	7	17563	360	0.28	0.28	0	0.03	0.19	0.49	0.97	360
Semantic Hierarchies	50	0.37	0.19	0.06	0.13	0.49	0.5	0.52	50	0.14	0.35	0	0	0	0	1	50	0.34	0.48	0	0	0	1	1	50	0.15	0.1	0.05	0.09	0.11	0.21	0.47	50	105.26	204.53	0	1	24.5	79.75	955	50	0.06	0.12	0	0	0.01	0.07	0.47	50
[truncated: 15 more columns]

## Sheet: example
	target_vsa_cosine_sim								next_token_precision@1								next_token_precision@5								next_token_softmax								target_token_rank								target_token_softmax								target_token_softmax_diff
	count	mean	std	min	25%	50%	75%	max	count	mean	std	min	25%	50%	75%	max	count	mean	std	min	25%	50%	75%	max	count	mean	std	min	25%	50%	75%	max	count	mean	std	min	25%	50%	75%	max	count	mean	std	min	25%	50%	75%	max	count
area
Verbal & Grammatical Forms	15	0.49	0.03	0.42	0.49	0.5	0.5	0.52	15	0.33	0.49	0	0	0	1	1	15	0.73	0.46	0	0.5	1	1	1	15	0.16	0.12	0.06	0.1	0.12	0.17	0.57	15	7.53	13.56	0	0	1	6.5	40	15	0.08	0.07	0	0.03	0.08	0.14	0.2	15
Semantic Relations	4	0.07	0.02	0.06	0.06	0.06	0.08	0.1	4	0	0	0	0	0	0	0	4	0	0	0	0	0	0	0	4	0.12	0.07	0.06	0.08	0.11	0.15	0.22	4	125.5	176.85	18	21	48	152.5	388	4	0	0	0	0	0	0.01	0.01	4
Semantic Hierarchies	1	0.06		0.06	0.06	0.06	0.06	0.06	1	0		0	0	0	0	0	1	1		1	1	1	1	1	1	0.1		0.1	0.1	0.1	0.1	0.1	1	4		4	4	4	4	4	1	0.04		0.04	0.04	0.04	0.04	0.04	1
Mathematics	1	0.05		0.05	0.05	0.05	0.05	0.05	1	0		0	0	0	0	0	1	0		0	0	0	0	0	1	0.64		0.64	0.64	0.64	0.64	0.64	1	4279		4279	4279	4279	4279	4279	1	0		0	0	0	0	0	1
Morphological Modifiers	1	0.05		0.05	0.05	0.05	0.05	0.05	1	0		0	0	0	0	0	1	0		0	0	0	0	0	1	0.09		0.09	0.09	0.09	0.09	0.09	1	83		83	83	83	83	83	1	0		0	0	0	0	0	1
[truncated: 15 more columns]

## Sheet: example_key
	target_vsa_cosine_sim								next_token_precision@1								next_token_precision@5								next_token_softmax								target_token_rank								target_token_softmax								target_token_softmax_diff
	count	mean	std	min	25%	50%	75%	max	count	mean	std	min	25%	50%	75%	max	count	mean	std	min	25%	50%	75%	max	count	mean	std	min	25%	50%	75%	max	count	mean	std	min	25%	50%	75%	max	count	mean	std	min	25%	50%	75%	max	count
area
Mathematics	2	0.06	0.01	0.05	0.05	0.06	0.06	0.06	2	0	0	0	0	0	0	0	2	0	0	0	0	0	0	0	2	0.56	0.01	0.55	0.55	0.56	0.56	0.56	2	3652.5	1386.64	2672	3162.25	3652.5	4142.75	4633	2	0	0	0	0	0	0	0	2
Factual Knowledge	879	0.03	0.08	-0.05	-0.01	0.01	0.02	0.51	879	0.39	0.47	0	0	0	1	1	879	0.58	0.45	0	0	1	1	1	879	0.28	0.24	0.05	0.13	0.19	0.33	0.98	879	316.27	3856.39	0	0	2	16	68282	879	0.19	0.27	0	0.01	0.08	0.25	0.98	879
Semantic Hierarchies	725	0.03	0.07	-0.1	-0.01	0	0.02	0.45	725	0.08	0.26	0	0	0	0	1	725	0.18	0.37	0	0	0	0	1	725	0.14	0.09	0.05	0.09	0.11	0.16	0.62	725	178.51	372.75	0	9	35	131	3130	725	0.03	0.07	0	0	0	0.02	0.54	725
Semantic Relations	543	0.02	0.06	-0.1	-0.01	0	0.01	0.5	543	0.22	0.4	0	0	0	0	1	543	0.34	0.45	0	0	0	1	1	543	0.23	0.19	0.03	0.1	0.16	0.29	0.98	543	487.08	2214.32	0	1	17	162	38688	543	0.11	0.2	0	0	0.01	0.13	0.98	543
Morphological Modifiers	102	0	0.02	-0.04	-0.02	0	0.01	0.04	102	0.38	0.46	0	0	0	1	1	102	0.49	0.47	0	0	0.5	1	1	102	0.23	0.19	0.06	0.09	0.16	0.28	0.9	102	48.86	235.46	0	0	2	39.75	2348	102	0.16	0.22	0	0	0.06	0.26	0.9	102
Verbal & Grammatical Forms	190	0	0.01	-0.04	-0.01	0	0.01	0.04	190	0.27	0.44	0	0	0	1	1	190	0.5	0.49	0	0	0.5	1	1	190	0.22	0.13	0.05	0.12	0.18	0.27	0.77	190	95.47	376.33	0	0	6	30	3229	190	0.1	0.15	0	0	0.03	0.13	0.77	190
[truncated: 15 more columns]

## Sheet: example_key&key
	target_vsa_cosine_sim								next_token_precision@1								next_token_precision@5								next_token_softmax								target_token_rank								target_token_softmax								target_token_softmax_diff
	count	mean	std	min	25%	50%	75%	max	count	mean	std	min	25%	50%	75%	max	count	mean	std	min	25%	50%	75%	max	count	mean	std	min	25%	50%	75%	max	count	mean	std	min	25%	50%	75%	max	count	mean	std	min	25%	50%	75%	max	count
area
Factual Knowledge	2	0.05	0	0.05	0.05	0.05	0.05	0.05	2	1	0	1	1	1	1	1	2	1	0	1	1	1	1	1	2	0.87	0	0.87	0.87	0.87	0.87	0.87	2	0	0	0	0	0	0	0	2	0.87	0	0.87	0.87	0.87	0.87	0.87	2
Semantic Hierarchies	2	0.05	0	0.05	0.05	0.05	0.05	0.05	2	0	0	0	0	0	0	0	2	0	0	0	0	0	0	0	2	0.08	0.01	0.07	0.07	0.08	0.08	0.08	2	20	7.07	15	17.5	20	22.5	25	2	0.01	0.01	0.01	0.01	0.01	0.02	0.02	2
Verbal & Grammatical Forms	1	0.05		0.05	0.05	0.05	0.05	0.05	1	0		0	0	0	0	0	1	0		0	0	0	0	0	1	0.09		0.09	0.09	0.09	0.09	0.09	1	348		348	348	348	348	348	1	0		0	0	0	0	0	1
[truncated: 15 more columns]

## Sheet: example_value
	target_vsa_cosine_sim								next_token_precision@1								next_token_precision@5								next_token_softmax								target_token_rank								target_token_softmax								target_token_softmax_diff
	count	mean	std	min	25%	50%	75%	max	count	mean	std	min	25%	50%	75%	max	count	mean	std	min	25%	50%	75%	max	count	mean	std	min	25%	50%	75%	max	count	mean	std	min	25%	50%	75%	max	count	mean	std	min	25%	50%	75%	max	count
area
Verbal & Grammatical Forms	115	0.18	0.27	-0.03	0	0.01	0.48	0.86	115	0.1	0.31	0	0	0	0	1	115	0.54	0.49	0	0	1	1	1	115	0.28	0.16	0.07	0.16	0.26	0.34	0.87	115	30.32	88.01	0	1	4	13.5	528	115	0.07	0.15	0	0.01	0.03	0.07	0.87	115
Morphological Modifiers	8	0.16	0.26	-0.02	0.01	0.03	0.22	0.72	8	0.38	0.44	0	0	0.25	0.62	1	8	0.62	0.44	0	0.38	0.75	1	1	8	0.3	0.19	0.06	0.16	0.29	0.38	0.65	8	2.88	4.49	0	0	0.5	3.75	11	8	0.22	0.24	0.01	0.03	0.11	0.38	0.65	8
Semantic Hierarchies	146	0.03	0.21	-0.85	0	0.09	0.13	0.42	146	0.11	0.29	0	0	0	0	1	146	0.33	0.44	0	0	0	1	1	146	0.14	0.08	0.06	0.09	0.12	0.17	0.53	146	54.58	139.12	0	3	9	29.75	919	146	0.05	0.08	0	0.01	0.02	0.05	0.53	146
Semantic Relations	87	-0.24	0.47	-0.9	-0.79	-0.08	0.16	0.47	87	0.1	0.28	0	0	0	0	1	87	0.24	0.42	0	0	0	0.5	1	87	0.19	0.16	0.04	0.09	0.14	0.23	0.91	87	268.16	836.16	0	5.5	17	86	6367	87	0.04	0.11	0	0	0.01	0.03	0.91	87
Factual Knowledge	87	-0.25	0.23	-0.88	-0.3	-0.19	-0.11	0.03	87	0.38	0.48	0	0	0	1	1	87	0.73	0.43	0	0.5	1	1	1	87	0.2	0.12	0.04	0.12	0.18	0.26	0.59	87	19.43	58.68	0	0	1	5	339	87	0.12	0.12	0	0.03	0.09	0.19	0.59	87
[truncated: 15 more columns]

[truncated: 4 more sheets: example_value&key, greedy, key, original]
