# Supplementary material
Source: ML conference proceedings conference paper supplement (https://openreview.net/forum?id=MSm0VFL9pq)
Supplement: supplementary_material [file context.xlsx]

## Sheet: items
area	domain	doc	target	generated_token	next_token_softmax	next_token_precision@1	next_token_precision@5	top5_tokens	target_token_rank	target_token_softmax	target_token_softmax_diff	normalized_target_token_rank	unbunding_type	extracted_factors	target_vsa_cosine_sim	precision@1	precision@3	precision@5	best_item_type	vsa_sim
Morphological Modifiers	noun+less_reg	godless is to god as soulless is to	soul	soul	0.82	1	1	{'soul': 0.82, 'spirit': 0.01, 'sou': 0.01, 'human': 0.01, 'the': 0.01}	0	0.816406	0	1	context	context|target	0.54	TRUE	TRUE	TRUE	target	{'soul': 0.54, 'soulless': 0.48}
Verbal & Grammatical Forms	verb_3pSg_Ved	becomes is to became as suggests is to	suggested	suggested	0.58	1	1	{'suggested': 0.58, 'suggest': 0.08, '?': 0.02, '__': 0.02}	0	0.582031	0	1	context	context|target	0.54	TRUE	TRUE	TRUE	target	{'suggested': 0.54, 'suggests': 0.47}
Verbal & Grammatical Forms	verb_Ving_3pSg	relating is to relates as sitting is to	sits	sits	0.55	1	1	{'sits': 0.55, 'sit': 0.14, '__': 0.02, '_____': 0.02, '____': 0.02}	0	0.546875	0	1	context	context|target	0.54	TRUE	TRUE	TRUE	target	{'sits': 0.54, 'sitting': 0.49}
Verbal & Grammatical Forms	verb_3pSg_Ved	becomes is to became as replaces is to	replaced	replaced	0.52	1	1	{'replaced': 0.52, 'replacement': 0.03, '?': 0.03, 'replace': 0.03, '': 0.03}	0	0.523438	0	1	context	context|target	0.54	TRUE	TRUE	TRUE	target	{'replaced': 0.54, 'replaces': 0.47}
Verbal & Grammatical Forms	verb_3pSg_Ved	became is to becomes as created is to	creates	creates	0.51	1	1	{'creates': 0.51, 'created': 0.06, '______': 0.05, '': 0.04, '__': 0.04}	0	0.507812	0	1	context	context|target	0.54	TRUE	TRUE	TRUE	target	{'creates': 0.54, 'created': 0.48}
Morphological Modifiers	verb+ment_irreg	advertisement is to advertise as amendment is to	amend	amend	0.5	1	1	{'amend': 0.5, 'am': 0.08, 'mend': 0.02, 'amendment': 0.02, '': 0.01}	0	0.503906	0	1	context	context|target	0.54	TRUE	TRUE	TRUE	target	{'amend': 0.54, 'amendment': 0.49}
Morphological Modifiers	adj+ly_reg	environmental is to environmentally as serious is to	seriously	seriously	0.46	1	1	{'seriously': 0.46, '______': 0.05, '?': 0.03, '': 0.02}	0	0.464844	0	1	context	context|target	0.54	TRUE	TRUE	TRUE	target	{'seriously': 0.54, 'serious': 0.52}
Verbal & Grammatical Forms	verb_3pSg_Ved	became is to becomes as replaced is to	replaces	replaces	0.41	1	1	{'replaces': 0.41, 'replaced': 0.12, 'replacing': 0.04, '?': 0.04, '': 0.03}	0	0.408203	0	1	context	context|target	0.54	TRUE	TRUE	TRUE	target	{'replaces': 0.54, 'replaced': 0.46}
Verbal & Grammatical Forms	verb_Ving_3pSg	requiring is to requires as sitting is to	sits	sit	0.38	0.5	1	{'sit': 0.38, 'sits': 0.17, 'sitting': 0.06, 'to': 0.04, 'sat': 0.03}	1	0.166016	0.208984	0.99999	context	context|target	0.54	TRUE	TRUE	TRUE	target	{'sits': 0.54, 'sitting': 0.49}
Verbal & Grammatical Forms	verb_inf_3pSg	adds is to add as continues is to	continue	continue	0.38	1	1	{'continue': 0.38, 'add': 0.08, 'be': 0.03, 'go': 0.03, 'continues': 0.02}	0	0.375	0	1	context	context|target	0.54	TRUE	TRUE	TRUE	target	{'continue': 0.54, 'continues': 0.48}
Verbal & Grammatical Forms	verb_inf_3pSg	achieves is to achieve as allows is to	allow	allow	0.3	1	1	{'allow': 0.3, 'achieve': 0.06, 'be': 0.04, 'allows': 0.04, 'accomplish': 0.02}	0	0.296875	0	1	context	context|target	0.54	TRUE	TRUE	TRUE	target	{'allow': 0.54, 'allows': 0.47}
Verbal & Grammatical Forms	verb_Ving_3pSg	requires is to requiring as sits is to	sitting	sitting	0.25	1	1	{'sitting': 0.25, 'seating': 0.05, 'sit': 0.04, '______': 0.03, 'what': 0.02}	0	0.248047	0	1	context	context|target	0.54	TRUE	TRUE	TRUE	target	{'sitting': 0.54, 'sits': 0.49}
Verbal & Grammatical Forms	verb_3pSg_Ved	became is to becomes as lost is to	loses	lost	0.25	0	1	{'lost': 0.25, 'loses': 0.22, 'losses': 0.09, 'lose': 0.07, 'loss': 0.06}	1	0.217773	0.0292969	0.99999	context	context|target	0.54	TRUE	TRUE	TRUE	target	{'loses': 0.54, 'lost': 0.47}
Morphological Modifiers	adj+ly_reg	seriously is to serious as successfully is to	successful	successfully	0.24	0	1	{'successfully': 0.24, 'success': 0.15, 'successful': 0.1, '______': 0.05, '__': 0.03}	2	0.10498	0.131348	0.99998	context	context|target	0.54	TRUE	TRUE	TRUE	target	{'successful': 0.54, 'successfully': 0.48}
Verbal & Grammatical Forms	verb_inf_Ving	continue is to continuing as require is to	requiring	requirement	0.17	0	1	{'requirement': 0.17, 'required': 0.13, 'requiring': 0.1, 'require': 0.08, '': 0.03}	2	0.10498	0.0678711	0.99998	context	context|target	0.54	TRUE	TRUE	TRUE	target	{'requiring': 0.54, 'require': 0.47}
Morphological Modifiers	verb+ment_irreg	advertise is to advertisement as amend is to	amendment	amendment	0.15	1	1	{'amendment': 0.15, '______': 0.1, '__': 0.06, '': 0.06, '?': 0.05}	0	0.149414	0	1	context	context|target	0.54	TRUE	TRUE	TRUE	target	{'amendment': 0.54, 'amend': 0.48}
Verbal & Grammatical Forms	verb_inf_3pSg	includes is to include as remains is to	remain	remain	0.15	1	1	{'remain': 0.15, 'be': 0.08, 'leave': 0.07, 'stay': 0.06, 'keep': 0.04}	0	0.15332	0	1	context	context|target	0.54	TRUE	TRUE	TRUE	target	{'remain': 0.54, 'remains': 0.48}
Verbal & Grammatical Forms	verb_3pSg_Ved	allows is to allowed as becomes is to	became	became	0.14	1	1	{'became': 0.14, 'become': 0.13, 'permitted': 0.06, 'forbidden': 0.05, 'allowed': 0.04}	0	0.137695	0	1	context	context|target	0.54	TRUE	TRUE	TRUE	target	{'became': 0.54, 'becomes': 0.51}
Morphological Modifiers	adj+ly_reg	serious is to seriously as successful is to	successfully	successfully	0.13	1	1	{'successfully': 0.13, 'success': 0.07, '______': 0.06, '?': 0.03, 'a': 0.03}	0	0.131836	0	1	context	context|target	0.54	TRUE	TRUE	TRUE	target	{'successfully': 0.54, 'successful': 0.47}
Verbal & Grammatical Forms	verb_inf_3pSg	agree is to agrees as include is to	includes	?	0.11	0	1	{'?': 0.11, '': 0.07, 'excludes': 0.08, 'includes': 0.07}	3	0.0737305	0.0405273	0.99997	context	context|target	0.54	TRUE	TRUE	TRUE	target	{'includes': 0.54, 'include': 0.5}
Verbal & Grammatical Forms	verb_inf_3pSg	achieve is to achieves as allow is to	allows	allow	0.09	0.5	1	{'allow': 0.09, '': 0.05, 'permit': 0.05, 'allows': 0.05}	4	0.0493164	0.0429688	0.99996	context	context|target	0.54	TRUE	TRUE	TRUE	target	{'allows': 0.54, 'allow': 0.47}
Verbal & Grammatical Forms	verb_inf_3pSg	add is to adds as continue is to	continues	continues	0.06	1	1	{'continues': 0.06, 'stops': 0.05, '__': 0.03, '': 0.03}	0	0.0588379	0	1	context	context|target	0.54	TRUE	TRUE	TRUE	target	{'continues': 0.54, 'continue': 0.48}
Morphological Modifiers	re+verb_reg	configure is to reconfigure as tell is to	retell	tell	0.55	0	0.5	{'tell': 0.55, 'told': 0.05, 'say': 0.02, 'inform': 0.02, 'ret': 0.01}	4	0.0128784	0.533997	0.99996	context	context|target	0.54	TRUE	TRUE	TRUE	target	{'retell': 0.54, 'tell': 0.48}
Morphological Modifiers	noun+less_reg	god is to godless as soul is to	soulless	soul	0.48	0.5	0.5	{'soul': 0.48, 'sou': 0.17, '______': 0.04, '_____': 0.02, '__': 0.02}	0	0.476562	0	1	context	context|target	0.54	TRUE	TRUE	TRUE	target	{'soulless': 0.54, 'soul': 0.48}
Morphological Modifiers	adj+ly_reg	globally is to global as seriously is to	serious	seriously	0.14	0	0	{'seriously': 0.14, '______': 0.11, 'locally': 0.11, '__': 0.04, '': 0.03}	18	0.00769043	0.129028	0.999821	context	context|target	0.54	TRUE	TRUE	TRUE	target	{'serious': 0.54, 'seriously': 0.52}
Morphological Modifiers	adj+ly_reg	mentally is to mental as seriously is to	serious	physically	0.14	0	0	{'physically': 0.14, '______': 0.11, 'seriously': 0.05, '__': 0.04, '': 0.04}	13	0.0137329	0.124939	0.99987	context	context|target	0.54	TRUE	TRUE	TRUE	target	{'serious': 0.54, 'seriously': 0.5}
Morphological Modifiers	verb+able_reg	rely is to reliable as sustain is to	sustainable		0.1	0	0	{'': 0.1, ':': 0.08, '______': 0.06, '?': 0.06}	7	0.0290527	0.0720215	0.99993	context	context|target	0.54	TRUE	TRUE	TRUE	target	{'sustainable': 0.54, 'sustain': 0.46}
Semantic Relations	male_female	sir is to madam as waiter is to	waitress	what	0.07	0	0	{'what': 0.07, '_': 0.07, '______': 0.06, '?': 0.06, '____': 0.06}	13	0.0140991	0.0576782	0.99987	context	context|target	0.54	TRUE	TRUE	TRUE	target	{'waitress': 0.54, 'waiter': 0.46}
Verbal & Grammatical Forms	verb_3pSg_Ved	became is to becomes as seemed is to	seems	seems	0.85	1	1	{'seems': 0.85, '______': 0.01, 'seemed': 0.01, '?': 0.01, '': 0.01}	0	0.847656	0	1	context	context|target	0.53	TRUE	TRUE	TRUE	target	{'seems': 0.53, 'seemed': 0.48}
Verbal & Grammatical Forms	verb_inf_Ving	continuing is to continue as requiring is to	require	require	0.84	1	1	{'require': 0.84, 'be': 0.03, 'ob': 0.01, 'continue': 0.01, 'requ': 0.01}	0	0.84375	0	1	context	context|target	0.53	TRUE	TRUE	TRUE	target	{'require': 0.53, 'requiring': 0.47}
Factual Knowledge	country_capital	Damascus is to Syria as Dhaka is to	bangladesh	Bangladesh	0.82	1	1	{'Bangladesh': 0.82, '______': 0.03, 'what': 0.02, '__': 0.01, '_____': 0.01}	0	0.816406	0	1	context	context|target	0.53	TRUE	TRUE	TRUE	target	{'bangladesh': 0.53, 'dhaka': 0.49}
Factual Knowledge	capital_world	Damascus is to Syria as Dhaka is to	bangladesh	Bangladesh	0.82	1	1	{'Bangladesh': 0.82, '______': 0.03, 'what': 0.02, '__': 0.01, '_____': 0.01}	0	0.816406	0	1	context	context|target	0.53	TRUE	TRUE	TRUE	target	{'bangladesh': 0.53, 'dhaka': 0.49}
Verbal & Grammatical Forms	verb_inf_Ved	accept is to accepted as provide is to	provided	provided	0.79	1	1	{'provided': 0.79, '______': 0.02, '__': 0.01, '____': 0.01, '': 0.01}	0	0.789062	0	1	context	context|target	0.53	TRUE	TRUE	TRUE	target	{'provided': 0.53, 'provide': 0.48}
Verbal & Grammatical Forms	verb_inf_Ving	enjoying is to enjoy as protecting is to	protect	protect	0.73	1	1	{'protect': 0.73, 'preserve': 0.03, 'be': 0.02, '': 0.02, 'guard': 0.01}	0	0.734375	0	1	context	context|target	0.53	TRUE	TRUE	TRUE	target	{'protect': 0.53, 'protecting': 0.48}
Morphological Modifiers	verb+able_reg	deliverable is to deliver as performable is to	perform	perform	0.71	1	1	{'perform': 0.71, 'be': 0.03, 'performed': 0.01, '': 0.01, 'deliver': 0.01}	0	0.714844	0	1	context	context|target	0.53	TRUE	TRUE	TRUE	target	{'perform': 0.53, 'performable': 0.46}
Morphological Modifiers	re+verb_reg	reconnect is to connect as republish is to	publish	publish	0.7	1	1	{'publish': 0.7, 'subscribe': 0.12, 'rep': 0.04, 'pub': 0.02, '': 0.01}	0	0.699219	0	1	context	context|target	0.53	TRUE	TRUE	TRUE	target	{'publish': 0.53, 'republish': 0.49}
Verbal & Grammatical Forms	verb_inf_3pSg	achieves is to achieve as improves is to	improve	improve	0.7	1	1	{'improve': 0.7, 'improves': 0.02, 'improv': 0.01, 'improving': 0.01, '': 0.01}	0	0.703125	0	1	context	context|target	0.53	TRUE	TRUE	TRUE	target	{'improve': 0.53, 'improves': 0.48}
Factual Knowledge	country_capital	Bangkok is to Thailand as Belgrade is to	serbia	Serbia	0.64	1	1	{'Serbia': 0.64, 'Yugoslavia': 0.05, 'what': 0.05, '______': 0.04, '__': 0.02}	0	0.640625	0	1	context	context|target	0.53	TRUE	TRUE	TRUE	target	{'serbia': 0.53, 'belgrade': 0.49}
Factual Knowledge	capital_world	Bangkok is to Thailand as Belgrade is to	serbia	Serbia	0.64	1	1	{'Serbia': 0.64, 'Yugoslavia': 0.05, 'what': 0.05, '______': 0.04, '__': 0.02}	0	0.640625	0	1	context	context|target	0.53	TRUE	TRUE	TRUE	target	{'serbia': 0.53, 'belgrade': 0.49}
Verbal & Grammatical Forms	verb_3pSg_Ved	becomes is to became as considers is to	considered	considered	0.64	1	1	{'considered': 0.64, '': 0.02, '__': 0.02, 'consider': 0.02}	0	0.644531	0	1	context	context|target	0.53	TRUE	TRUE	TRUE	target	{'considered': 0.53, 'considers': 0.49}
Verbal & Grammatical Forms	verb_inf_3pSg	continues is to continue as includes is to	include	include	0.63	1	1	{'include': 0.63, 'continue': 0.05, 'included': 0.05, 'includes': 0.04, 'includ': 0.02}	0	0.628906	0	1	context	context|target	0.53	TRUE	TRUE	TRUE	target	{'include': 0.53, 'includes': 0.5}
Verbal & Grammatical Forms	verb_inf_Ving	improving is to improve as maintaining is to	maintain	maintain	0.62	1	1	{'maintain': 0.62, 'keep': 0.04, 'remain': 0.04, 'stay': 0.03, 'improve': 0.02}	0	0.625	0	1	context	context|target	0.53	TRUE	TRUE	TRUE	target	{'maintain': 0.53, 'maintaining': 0.48}
Morphological Modifiers	verb+able_reg	execute is to executable as rely is to	reliable	reliable	0.61	1	1	{'reliable': 0.61, 'reliant': 0.05, 'reli': 0.02, 'reliability': 0.02, '______': 0.02}	0	0.605469	0	1	context	context|target	0.53	TRUE	TRUE	TRUE	target	{'reliable': 0.53, 'rely': 0.51}
Morphological Modifiers	noun+less_reg	godless is to god as windowless is to	window	window	0.61	1	1	{'window': 0.61, 'windows': 0.06, 'door': 0.05, 'house': 0.04, 'wall': 0.04}	0	0.613281	0	1	context	context|target	0.53	TRUE	TRUE	TRUE	target	{'window': 0.53, 'windowless': 0.47}
Verbal & Grammatical Forms	verb_inf_3pSg	achieves is to achieve as prevents is to	prevent	prevent	0.61	1	1	{'prevent': 0.61, 'prevents': 0.11, 'pre': 0.01, '': 0.01, 'permit': 0.01}	0	0.605469	0	1	context	context|target	0.53	TRUE	TRUE	TRUE	target	{'prevent': 0.53, 'prevents': 0.49}
Verbal & Grammatical Forms	verb_3pSg_Ved	became is to becomes as continued is to	continues	continues	0.6	1	1	{'continues': 0.6, 'continued': 0.05, '': 0.03, '__': 0.03}	0	0.601562	0	1	context	context|target	0.53	TRUE	TRUE	TRUE	target	{'continues': 0.53, 'continued': 0.48}
Verbal & Grammatical Forms	verb_3pSg_Ved	becomes is to became as introduces is to	introduced	introduced	0.57	1	1	{'introduced': 0.57, 'introduce': 0.06, '': 0.02, 'introdu': 0.02}	0	0.570312	0	1	context	context|target	0.53	TRUE	TRUE	TRUE	target	{'introduced': 0.53, 'introduces': 0.47}
Morphological Modifiers	verb+ment_irreg	encouragement is to encourage as enhancement is to	enhance	enhance	0.56	1	1	{'enhance': 0.56, '': 0.01, 'improve': 0.02, 'augment': 0.02}	0	0.558594	0	1	context	context|target	0.53	TRUE	TRUE	TRUE	target	{'enhance': 0.53, 'enhancement': 0.48}
Morphological Modifiers	verb+able_reg	recognize is to recognizable as rely is to	reliable	reliable	0.55	1	1	{'reliable': 0.55, '__': 0.05, 'reliant': 0.05, '______': 0.05, '': 0.03}	0	0.554688	0	1	context	context|target	0.53	TRUE	TRUE	TRUE	target	{'reliable': 0.53, 'rely': 0.51}
Verbal & Grammatical Forms	verb_Ving_3pSg	relates is to relating as sits is to	sitting	sitting	0.55	1	1	{'sitting': 0.55, 'sit': 0.1, 'sits': 0.04, 'seating': 0.02, '______': 0.02}	0	0.550781	0	1	context	context|target	0.53	TRUE	TRUE	TRUE	target	{'sitting': 0.53, 'sits': 0.48}
Verbal & Grammatical Forms	verb_inf_3pSg	accept is to accepts as include is to	includes	includes	0.54	1	1	{'includes': 0.54, 'included': 0.17, 'excludes': 0.03, 'including': 0.03, 'includ': 0.03}	0	0.535156	0	1	context	context|target	0.53	TRUE	TRUE	TRUE	target	{'includes': 0.53, 'include': 0.49}
Morphological Modifiers	adj_comparative	huge is to huger as strong is to	stronger	stronger	0.53	1	1	{'stronger': 0.53, '______': 0.08, '__': 0.04, '_____': 0.02, 'st': 0.02}	0	0.527344	0	1	context	context|target	0.53	TRUE	TRUE	TRUE	target	{'stronger': 0.53, 'strong': 0.5}
Verbal & Grammatical Forms	verb_inf_3pSg	includes is to include as reduces is to	reduce	reduce	0.53	1	1	{'reduce': 0.53, 'lessen': 0.07, 'exclude': 0.05, 'subtract': 0.03, 'increase': 0.02}	0	0.527344	0	1	context	context|target	0.53	TRUE	TRUE	TRUE	target	{'reduce': 0.53, 'reduces': 0.47}
Morphological Modifiers	adj+ly_reg	obviously is to obvious as seriously is to	serious	serious	0.52	1	1	{'serious': 0.52, 'seriously': 0.33, 'seriousness': 0.01, 'seri': 0.01, 'ser': 0.0}	0	0.519531	0	1	context	context|target	0.53	TRUE	TRUE	TRUE	target	{'serious': 0.53, 'seriously': 0.53}
Verbal & Grammatical Forms	adjective_to_adverb	obviously is to obvious as seriously is to	serious	serious	0.52	1	1	{'serious': 0.52, 'seriously': 0.33, 'seriousness': 0.01, 'seri': 0.01, 'ser': 0.0}	0	0.519531	0	1	context	context|target	0.53	TRUE	TRUE	TRUE	target	{'serious': 0.53, 'seriously': 0.53}
Verbal & Grammatical Forms	verb_inf_3pSg	avoid is to avoids as seem is to	seems	seems	0.52	1	1	{'seems': 0.52, 'seen': 0.05, 'seem': 0.04, 'seeming': 0.04, 'sees': 0.03}	0	0.515625	0	1	context	context|target	0.53	TRUE	TRUE	TRUE	target	{'seems': 0.53, 'seem': 0.48}
Verbal & Grammatical Forms	verb_inf_3pSg	includes is to include as protects is to	protect	protect	0.51	1	1	{'protect': 0.51, 'protects': 0.04, 'include': 0.03, 'keep': 0.03, 'exclude': 0.02}	0	0.507812	0	1	context	context|target	0.53	TRUE	TRUE	TRUE	target	{'protect': 0.53, 'protects': 0.48}
Verbal & Grammatical Forms	verb_3pSg_Ved	became is to becomes as described is to	describes	described	0.5	0	1	{'described': 0.5, 'describes': 0.13, 'describe': 0.05, 'descri': 0.03, 'des': 0.02}	1	0.126953	0.376953	0.99999	context	context|target	0.53	TRUE	TRUE	TRUE	target	{'describes': 0.53, 'described': 0.48}
Verbal & Grammatical Forms	verb_3pSg_Ved	became is to becomes as contained is to	contains	contains	0.5	1	1	{'contains': 0.5, 'contained': 0.05, '__': 0.03, 'contain': 0.03, 'container': 0.02}	0	0.503906	0	1	context	context|target	0.53	TRUE	TRUE	TRUE	target	{'contains': 0.53, 'contained': 0.48}
Morphological Modifiers	adj_comparative	sexy is to sexier as strong is to	stronger	stronger	0.48	1	1	{'stronger': 0.48, '______': 0.08, '__': 0.03, 'strong': 0.03, 'what': 0.02}	0	0.476562	0	1	context	context|target	0.53	TRUE	TRUE	TRUE	target	{'stronger': 0.53, 'strong': 0.5}
Factual Knowledge	country_capital	Copenhagen is to Denmark as Warsaw is to	poland	Poland	0.47	1	1	{'Poland': 0.47, '______': 0.05, 'what': 0.03, '?': 0.03, 'which': 0.02}	0	0.46875	0	1	context	context|target	0.53	TRUE	TRUE	TRUE	target	{'poland': 0.53, 'warsaw': 0.47}
Verbal & Grammatical Forms	verb_Ving_Ved	contained is to containing as involved is to	involving	involving	0.47	1	1	{'involving': 0.47, '______': 0.06, 'invol': 0.06, '__': 0.04, 'involved': 0.03}	0	0.474609	0	1	context	context|target	0.53	TRUE	TRUE	TRUE	target	{'involving': 0.53, 'involved': 0.5}
Verbal & Grammatical Forms	verb_3pSg_Ved	becomes is to became as creates is to	created	created	0.47	1	1	{'created': 0.47, '': 0.03, '______': 0.04, '__': 0.04}	0	0.466797	0	1	context	context|target	0.53	TRUE	TRUE	TRUE	target	{'created': 0.53, 'creates': 0.47}
Morphological Modifiers	re+verb_reg	recommend is to commend as reconnect is to	connect	reconnect	0.46	0	1	{'reconnect': 0.46, 're': 0.16, 'connect': 0.03, 'recon': 0.03, '': 0.03}	2	0.0311279	0.425903	0.99998	context	context|target	0.53	TRUE	TRUE	TRUE	target	{'connect': 0.53, 'reconnect': 0.47}
Verbal & Grammatical Forms	verb_inf_3pSg	includes is to include as tells is to	tell	tell	0.46	1	1	{'tell': 0.46, 'say': 0.08, 'include': 0.03, 'inform': 0.03, 'state': 0.02}	0	0.464844	0	1	context	context|target	0.53	TRUE	TRUE	TRUE	target	{'tell': 0.53, 'tells': 0.46}
Verbal & Grammatical Forms	verb_3pSg_Ved	becomes is to became as contains is to	contained	contained	0.44	1	1	{'contained': 0.44, 'contain': 0.05, '__': 0.04, 'contains': 0.04, '': 0.03}	0	0.441406	0	1	context	context|target	0.53	TRUE	TRUE	TRUE	target	{'contained': 0.53, 'contains': 0.47}
Morphological Modifiers	noun+less_reg	deathless is to death as soulless is to	soul	soul	0.43	1	1	{'soul': 0.43, 'life': 0.15, 'body': 0.1, 'living': 0.03, 'mind': 0.03}	0	0.427734	0	1	context	context|target	0.53	TRUE	TRUE	TRUE	target	{'soul': 0.53, 'soulless': 0.49}
Verbal & Grammatical Forms	verb_3pSg_Ved	becomes is to became as seems is to	seemed	seemed	0.41	1	1	{'seemed': 0.41, 'seem': 0.16, 'seems': 0.07, 'seen': 0.06, '______': 0.03}	0	0.412109	0	1	context	context|target	0.53	TRUE	TRUE	TRUE	target	{'seemed': 0.53, 'seems': 0.47}
Morphological Modifiers	adj_superlative	cutest is to cute as healthiest is to	healthy	healthy	0.4	1	1	{'healthy': 0.4, 'health': 0.08, '______': 0.05, '_____': 0.03, '____': 0.03}	0	0.402344	0	1	context	context|target	0.53	TRUE	TRUE	TRUE	target	{'healthy': 0.53, 'healthiest': 0.5}
Verbal & Grammatical Forms	verb_inf_3pSg	achieves is to achieve as remains is to	remain	remain	0.4	1	1	{'remain': 0.4, 'be': 0.12, 'become': 0.04, 'achieve': 0.02, 'stay': 0.02}	0	0.400391	0	1	context	context|target	0.53	TRUE	TRUE	TRUE	target	{'remain': 0.53, 'remains': 0.5}
Verbal & Grammatical Forms	noun_plural_irreg	duty is to duties as woman is to	women	women	0.4	1	1	{'women': 0.4, 'woman': 0.08, 'wives': 0.05, 'men': 0.05, 'wife': 0.04}	0	0.396484	0	1	context	context|target	0.53	TRUE	TRUE	TRUE	target	{'women': 0.53, 'woman': 0.5}
Verbal & Grammatical Forms	verb_3pSg_Ved	occurred is to occurs as suggested is to	suggests	suggested	0.4	0	1	{'suggested': 0.4, 'suggest': 0.29, 'suggesting': 0.07, 'suggestion': 0.04, 'suggests': 0.02}	4	0.0213623	0.380981	0.99996	context	context|target	0.53	TRUE	TRUE	TRUE	target	{'suggests': 0.53, 'suggested': 0.48}
Morphological Modifiers	adj+ly_reg	seriously is to serious as virtually is to	virtual	virtually	0.39	0	1	{'virtually': 0.39, 'virtual': 0.28, 'real': 0.02, '______': 0.01, 'not': 0.01}	1	0.283203	0.105469	0.99999	context	context|target	0.53	TRUE	TRUE	TRUE	target	{'virtual': 0.53, 'virtually': 0.48}
Morphological Modifiers	noun+less_reg	heartless is to heart as lawless is to	law	law	0.38	1	1	{'law': 0.38, '____': 0.05, '______': 0.05, '': 0.04, '_____': 0.04}	0	0.378906	0	1	context	context|target	0.53	TRUE	TRUE	TRUE	target	{'law': 0.53, 'lawless': 0.49}
Verbal & Grammatical Forms	verb_3pSg_Ved	became is to becomes as provided is to	provides	provided	0.38	0	1	{'provided': 0.38, 'provides': 0.08, '__': 0.04, '______': 0.04, '': 0.04}	1	0.0786133	0.296387	0.99999	context	context|target	0.53	TRUE	TRUE	TRUE	target	{'provides': 0.53, 'provided': 0.46}
Verbal & Grammatical Forms	verb_Ving_3pSg	appearing is to appears as developing is to	develops	develop	0.37	0.5	1	{'develop': 0.37, 'develops': 0.12, 'developed': 0.1, 'appear': 0.06, 'development': 0.04}	1	0.119141	0.248047	0.99999	context	context|target	0.53	TRUE	TRUE	TRUE	target	{'develops': 0.53, 'developing': 0.5}
Verbal & Grammatical Forms	noun_plural_reg	gods is to god as hours is to	hour	day	0.37	0	1	{'day': 0.37, 'hour': 0.24, 'time': 0.12, 'year': 0.04, 'a': 0.04}	1	0.238281	0.130859	0.99999	context	context|target	0.53	TRUE	TRUE	TRUE	target	{'hour': 0.53, 'hours': 0.48}
Verbal & Grammatical Forms	verb_Ving_Ved	deciding is to decided as understanding is to	understood	understand	0.37	0	1	{'understand': 0.37, 'understood': 0.21, 'understanding': 0.12, '__': 0.02, '______': 0.01}	1	0.209961	0.15918	0.99999	context	context|target	0.53	TRUE	TRUE	TRUE	target	{'understood': 0.53, 'understanding': 0.47}
Verbal & Grammatical Forms	verb_3pSg_Ved	became is to becomes as considered is to	considers	considers	0.36	1	1	{'considers': 0.36, 'considered': 0.16, 'considering': 0.08, 'consider': 0.07, '': 0.02}	0	0.357422	0	1	context	context|target	0.53	TRUE	TRUE	TRUE	target	{'considers': 0.53, 'considered': 0.49}
Morphological Modifiers	verb+able_reg	executable is to execute as replaceable is to	replace	replace	0.33	1	1	{'replace': 0.33, 'be': 0.06, 'execute': 0.05, 'executable': 0.02, 'substitute': 0.01}	0	0.333984	0	1	context	context|target	0.53	TRUE	TRUE	TRUE	target	{'replace': 0.53, 'replaceable': 0.48}
Verbal & Grammatical Forms	verb_inf_3pSg	agrees is to agree as sends is to	send	send	0.33	1	1	{'send': 0.33, 'sends': 0.14, 'receive': 0.08, 'sent': 0.03, 'be': 0.03}	0	0.328125	0	1	context	context|target	0.53	TRUE	TRUE	TRUE	target	{'send': 0.53, 'sends': 0.49}
Verbal & Grammatical Forms	verb_inf_Ved	become is to became as replace is to	replaced	replaced	0.31	1	1	{'replaced': 0.31, 'repl': 0.05, '?': 0.04, '': 0.04}	0	0.310547	0	1	context	context|target	0.53	TRUE	TRUE	TRUE	target	{'replaced': 0.53, 'replace': 0.5}
Morphological Modifiers	adj_comparative	sexier is to sexy as stronger is to	strong	strong	0.3	1	1	{'strong': 0.3, 'stronger': 0.21, '______': 0.04, 'strength': 0.03, 'weak': 0.03}	0	0.304688	0	1	context	context|target	0.53	TRUE	TRUE	TRUE	target	{'strong': 0.53, 'stronger': 0.5}
Verbal & Grammatical Forms	verb_inf_Ving	adding is to add as enjoying is to	enjoy	enjoy	0.3	1	1	{'enjoy': 0.3, 'be': 0.06, 'endure': 0.04, 'rejoice': 0.04, 'play': 0.02}	0	0.298828	0	1	context	context|target	0.53	TRUE	TRUE	TRUE	target	{'enjoy': 0.53, 'enjoying': 0.5}
Verbal & Grammatical Forms	verb_inf_3pSg	achieves is to achieve as provides is to	provide	provide	0.3	1	1	{'provide': 0.3, 'provides': 0.15, 'achieve': 0.02, 'provided': 0.02, 'providing': 0.02}	0	0.298828	0	1	context	context|target	0.53	TRUE	TRUE	TRUE	target	{'provide': 0.53, 'provides': 0.48}
Verbal & Grammatical Forms	verb_inf_3pSg	remains is to remain as understands is to	understand	understand	0.3	1	1	{'understand': 0.3, 'be': 0.11, 'stand': 0.03, 'know': 0.02, 'remain': 0.01}	0	0.304688	0	1	context	context|target	0.53	TRUE	TRUE	TRUE	target	{'understand': 0.53, 'understands': 0.45}
Verbal & Grammatical Forms	verb_3pSg_Ved	became is to becomes as introduced is to	introduces	introduces	0.3	1	1	{'introduces': 0.3, 'introduced': 0.15, 'introduce': 0.07, 'introducing': 0.06, '': 0.04}	0	0.304688	0	1	context	context|target	0.53	TRUE	TRUE	TRUE	target	{'introduces': 0.53, 'introduced': 0.47}
Morphological Modifiers	adj+ly_reg	seriously is to serious as similarly is to	similar	similar	0.29	1	1	{'similar': 0.29, 'similarly': 0.09, 'same': 0.08, 'sim': 0.04, 'similarity': 0.04}	0	0.289062	0	1	context	context|target	0.53	TRUE	TRUE	TRUE	target	{'similar': 0.53, 'similarly': 0.47}
Factual Knowledge	country_capital	Thailand is to Bangkok as Canada is to	ottawa	Toronto	0.28	0	1	{'Toronto': 0.28, '______': 0.09, 'Ottawa': 0.09, '__': 0.06, '_____': 0.04}	1	0.0854492	0.195801	0.99999	context	context|target	0.53	TRUE	TRUE	TRUE	target	{'ottawa': 0.53, 'canada': 0.49}
Factual Knowledge	capital_world	Thailand is to Bangkok as Canada is to	ottawa	Toronto	0.28	0	1	{'Toronto': 0.28, '______': 0.09, 'Ottawa': 0.09, '__': 0.06, '_____': 0.04}	1	0.0854492	0.195801	0.99999	context	context|target	0.53	TRUE	TRUE	TRUE	target	{'ottawa': 0.53, 'canada': 0.49}
Morphological Modifiers	re+verb_reg	configure is to reconfigure as connect is to	reconnect	connect	0.28	0	1	{'connect': 0.28, 'connection': 0.06, 'configure': 0.04, 'disconnect': 0.04, 'reconnect': 0.03}	4	0.0307617	0.244629	0.99996	context	context|target	0.53	TRUE	TRUE	TRUE	target	{'reconnect': 0.53, 'connect': 0.5}
Verbal & Grammatical Forms	verb_inf_3pSg	learns is to learn as provides is to	provide	provides	0.27	0	1	{'provides': 0.27, 'provide': 0.21, 'providing': 0.02, 'provided': 0.02, 'provider': 0.02}	1	0.207031	0.0585938	0.99999	context	context|target	0.53	TRUE	TRUE	TRUE	target	{'provide': 0.53, 'provides': 0.48}
Verbal & Grammatical Forms	verb_inf_Ved	reduced is to reduce as seemed is to	seem	seem	0.27	1	1	{'seem': 0.27, 'seemed': 0.23, 'seen': 0.09, 'see': 0.04, 'seeming': 0.03}	0	0.271484	0	1	context	context|target	0.53	TRUE	TRUE	TRUE	target	{'seem': 0.53, 'seemed': 0.46}
Morphological Modifiers	verb+able_reg	reliable is to rely as replaceable is to	replace	replace	0.26	1	1	{'replace': 0.26, '______': 0.09, '__': 0.04, 'reliable': 0.03, '': 0.02}	0	0.263672	0	1	context	context|target	0.53	TRUE	TRUE	TRUE	target	{'replace': 0.53, 'replaceable': 0.49}
Verbal & Grammatical Forms	verb_Ving_Ved	decided is to deciding as existed is to	existing	existed	0.26	0	1	{'existed': 0.26, 'existing': 0.2, 'exist': 0.11, 'existence': 0.09, 'having': 0.02}	1	0.199219	0.0566406	0.99999	context	context|target	0.53	TRUE	TRUE	TRUE	target	{'existing': 0.53, 'existed': 0.5}
Verbal & Grammatical Forms	verb_Ving_3pSg	involves is to involving as requires is to	requiring	requires	0.25	0	1	{'requires': 0.25, 'requiring': 0.11, '': 0.06, 'require': 0.05, 'required': 0.04}	1	0.111816	0.140137	0.99999	context	context|target	0.53	TRUE	TRUE	TRUE	target	{'requiring': 0.53, 'requires': 0.49}
Verbal & Grammatical Forms	verb_3pSg_Ved	developed is to develops as occurred is to	occurs	occurs	0.25	1	1	{'occurs': 0.25, 'occurred': 0.09, 'occur': 0.08, '': 0.04, '______': 0.02}	0	0.249023	0	1	context	context|target	0.53	TRUE	TRUE	TRUE	target	{'occurs': 0.53, 'occurred': 0.49}
Verbal & Grammatical Forms	adjective_to_adverb	serious is to seriously as obvious is to	obviously	obviously	0.24	1	1	{'obviously': 0.24, 'obvious': 0.13, '______': 0.04, 'clearly': 0.03, '_____': 0.02}	0	0.238281	0	1	context	context|target	0.53	TRUE	TRUE	TRUE	target	{'obviously': 0.53, 'obvious': 0.44}
Factual Knowledge	country_capital	Denmark is to Copenhagen as Poland is to	warsaw	Warsaw	0.23	1	1	{'Warsaw': 0.23, '______': 0.09, '_____': 0.06, '____': 0.04, '__': 0.03}	0	0.232422	0	1	context	context|target	0.53	TRUE	TRUE	TRUE	target	{'warsaw': 0.53, 'poland': 0.47}
Verbal & Grammatical Forms	verb_inf_3pSg	improve is to improves as include is to	includes	includes	0.23	1	1	{'includes': 0.23, '?': 0.07, '': 0.03}	0	0.232422	0	1	context	context|target	0.53	TRUE	TRUE	TRUE	target	{'includes': 0.53, 'include': 0.51}
Verbal & Grammatical Forms	verb_inf_3pSg	creates is to create as includes is to	include	include	0.23	1	1	{'include': 0.23, 'includes': 0.07, 'be': 0.05, 'exclude': 0.03, 'create': 0.02}	0	0.233398	0	1	context	context|target	0.53	TRUE	TRUE	TRUE	target	{'include': 0.53, 'includes': 0.51}
Verbal & Grammatical Forms	verb_inf_Ving	enjoying is to enjoy as learning is to	learn	learn	0.23	1	1	{'learn': 0.23, 'enjoy': 0.07, 'teach': 0.06, 'understand': 0.06, 'know': 0.05}	0	0.232422	0	1	context	context|target	0.53	TRUE	TRUE	TRUE	target	{'learn': 0.53, 'learning': 0.47}
Verbal & Grammatical Forms	verb_inf_3pSg	ensures is to ensure as sends is to	send	send	0.22	1	1	{'send': 0.22, 'ensure': 0.14, 'sends': 0.09, 'ensures': 0.07, 'receive': 0.03}	0	0.22168	0	1	context	context|target	0.53	TRUE	TRUE	TRUE	target	{'send': 0.53, 'sends': 0.49}
Verbal & Grammatical Forms	past_tense	enhanced is to enhancing as described is to	describing	describing	0.21	1	1	{'describing': 0.21, 'descriptive': 0.11, '______': 0.07, 'described': 0.04, '__': 0.03}	0	0.213867	0	1	context	context|target	0.53	TRUE	TRUE	TRUE	target	{'describing': 0.53, 'described': 0.48}
Verbal & Grammatical Forms	verb_inf_3pSg	improve is to improves as prevent is to	prevents	prevents	0.2	1	1	{'prevents': 0.2, '': 0.04, '?': 0.05}	0	0.200195	0	1	context	context|target	0.53	TRUE	TRUE	TRUE	target	{'prevents': 0.53, 'prevent': 0.49}
Verbal & Grammatical Forms	verb_inf_3pSg	remains is to remain as sends is to	send	send	0.2	1	1	{'send': 0.2, 'sent': 0.15, 'be': 0.04, 'remain': 0.02, 'stay': 0.02}	0	0.196289	0	1	context	context|target	0.53	TRUE	TRUE	TRUE	target	{'send': 0.53, 'sends': 0.48}
Morphological Modifiers	adj+ly_reg	serious is to seriously as virtual is to	virtually	virtually	0.19	1	1	{'virtually': 0.19, 'virtual': 0.12, '______': 0.06, '?': 0.03, '____': 0.02}	0	0.186523	0	1	context	context|target	0.53	TRUE	TRUE	TRUE	target	{'virtually': 0.53, 'virtual': 0.48}
Verbal & Grammatical Forms	verb_inf_3pSg	provide is to provides as send is to	sends	sends	0.19	1	1	{'sends': 0.19, '': 0.1, '?': 0.05, 'receives': 0.03}	0	0.185547	0	1	context	context|target	0.53	TRUE	TRUE	TRUE	target	{'sends': 0.53, 'send': 0.49}
Morphological Modifiers	adj+ly_reg	seriously is to serious as strongly is to	strong	strongly	0.18	0	1	{'strongly': 0.18, 'strong': 0.07, 'seriously': 0.05, '______': 0.04, 'what': 0.02}	1	0.0678711	0.116699	0.99999	context	context|target	0.53	TRUE	TRUE	TRUE	target	{'strong': 0.53, 'strongly': 0.48}
Morphological Modifiers	verb+er_irreg	loser is to lose as organiser is to	organise	organise	0.18	1	1	{'organise': 0.18, '': 0.03, '?': 0.05, 'organ': 0.03}	0	0.176758	0	1	context	context|target	0.53	TRUE	TRUE	TRUE	target	{'organise': 0.53, 'organiser': 0.49}
Verbal & Grammatical Forms	verb_inf_3pSg	learn is to learns as provide is to	provides	provides	0.17	1	1	{'provides': 0.17, '': 0.06, '?': 0.05, '______': 0.05, '__': 0.04}	0	0.166016	0	1	context	context|target	0.53	TRUE	TRUE	TRUE	target	{'provides': 0.53, 'provide': 0.48}
Verbal & Grammatical Forms	verb_Ving_3pSg	developing is to develops as requiring is to	requires	requires	0.16	1	1	{'requires': 0.16, 'require': 0.09, 'required': 0.07, '': 0.04, '______': 0.03}	0	0.157227	0	1	context	context|target	0.53	TRUE	TRUE	TRUE	target	{'requires': 0.53, 'requiring': 0.5}
Verbal & Grammatical Forms	verb_inf_3pSg	achieve is to achieves as include is to	includes	includes	0.16	1	1	{'includes': 0.16, 'include': 0.11, '': 0.03, '?': 0.03}	0	0.158203	0	1	context	context|target	0.53	TRUE	TRUE	TRUE	target	{'includes': 0.53, 'include': 0.51}
Verbal & Grammatical Forms	verb_inf_3pSg	follow is to follows as prevent is to	prevents		0.16	0	1	{'': 0.06, 'preced': 0.07, 'prevents': 0.06, '_____': 0.03}	2	0.0617676	0.0964355	0.99998	context	context|target	0.53	TRUE	TRUE	TRUE	target	{'prevents': 0.53, 'prevent': 0.5}
Verbal & Grammatical Forms	verb_inf_3pSg	achieve is to achieves as ensure is to	ensures	ensure	0.16	0.5	1	{'ensure': 0.16, 'ensures': 0.1, '': 0.06, '______': 0.07}	1	0.104004	0.0571289	0.99999	context	context|target	0.53	TRUE	TRUE	TRUE	target	{'ensures': 0.53, 'ensure': 0.48}
Verbal & Grammatical Forms	verb_inf_Ved	develop is to developed as discover is to	discovered	discovered	0.15	1	1	{'discovered': 0.15, '______': 0.08, '': 0.06, '?': 0.05, '__': 0.05}	0	0.147461	0	1	context	context|target	0.53	TRUE	TRUE	TRUE	target	{'discovered': 0.53, 'discover': 0.47}
Morphological Modifiers	adj+ly_reg	obvious is to obviously as serious is to	seriously	seriously	0.14	1	1	{'seriously': 0.14, '______': 0.08, 'serious': 0.05, '...': 0.04, '__': 0.03}	0	0.143555	0	1	context	context|target	0.53	TRUE	TRUE	TRUE	target	{'seriously': 0.53, 'serious': 0.53}
Verbal & Grammatical Forms	verb_Ving_3pSg	requires is to requiring as teaches is to	teaching	teaching	0.14	1	1	{'teaching': 0.14, '______': 0.09, '_____': 0.06, '__': 0.05, '': 0.03}	0	0.141602	0	1	context	context|target	0.53	TRUE	TRUE	TRUE	target	{'teaching': 0.53, 'teaches': 0.49}
Verbal & Grammatical Forms	adjective_to_adverb	obvious is to obviously as serious is to	seriously	seriously	0.14	1	1	{'seriously': 0.14, '______': 0.08, 'serious': 0.05, '...': 0.04, '__': 0.03}	0	0.143555	0	1	context	context|target	0.53	TRUE	TRUE	TRUE	target	{'seriously': 0.53, 'serious': 0.53}
Verbal & Grammatical Forms	verb_inf_Ving	enjoy is to enjoying as remain is to	remaining	remaining	0.14	1	1	{'remaining': 0.14, '': 0.05, '______': 0.06, '__': 0.04}	0	0.141602	0	1	context	context|target	0.53	TRUE	TRUE	TRUE	target	{'remaining': 0.53, 'remain': 0.48}
Morphological Modifiers	verb+able_reg	advise is to advisable as rely is to	reliable	______	0.13	0	1	{'______': 0.13, '': 0.07, 'reliable': 0.06, '?': 0.04, '__': 0.04}	2	0.0612793	0.0686035	0.99998	context	context|target	0.53	TRUE	TRUE	TRUE	target	{'reliable': 0.53, 'rely': 0.51}
Verbal & Grammatical Forms	verb_Ving_3pSg	developing is to develops as involving is to	involves	involves	0.13	1	1	{'involves': 0.13, 'involve': 0.09, 'involved': 0.06, '': 0.03, '______': 0.03}	0	0.125977	0	1	context	context|target	0.53	TRUE	TRUE	TRUE	target	{'involves': 0.53, 'involving': 0.49}
Verbal & Grammatical Forms	verb_inf_Ving	enjoy is to enjoying as protect is to	protecting	protecting	0.13	1	1	{'protecting': 0.13, '______': 0.13, '__': 0.09, '_____': 0.05, 'protection': 0.04}	0	0.128906	0	1	context	context|target	0.53	TRUE	TRUE	TRUE	target	{'protecting': 0.53, 'protect': 0.48}
Morphological Modifiers	verb+tion_irreg	authorize is to authorization as stabilize is to	stabilization	stability	0.12	0	1	{'stability': 0.12, 'stabilization': 0.09, '______': 0.08, '': 0.06}	1	0.0883789	0.0322266	0.99999	context	context|target	0.53	TRUE	TRUE	TRUE	target	{'stabilization': 0.53, 'stabilize': 0.46}
Verbal & Grammatical Forms	verb_inf_3pSg	continue is to continues as include is to	includes	include	0.12	0.5	1	{'include': 0.12, 'includes': 0.06, '__': 0.06, '': 0.03}	1	0.0603027	0.0598145	0.99999	context	context|target	0.53	TRUE	TRUE	TRUE	target	{'includes': 0.53, 'include': 0.5}
Morphological Modifiers	verb+able_reg	deliverable is to deliver as executable is to	execute	deliver	0.11	0	1	{'deliver': 0.11, 'execute': 0.09, 'run': 0.06, 'be': 0.05, 'compile': 0.03}	1	0.0942383	0.0126953	0.99999	context	context|target	0.53	TRUE	TRUE	TRUE	target	{'execute': 0.53, 'executable': 0.48}
Morphological Modifiers	verb+ment_irreg	arrangement is to arrange as enhancement is to	enhance	enhance	0.11	1	1	{'enhance': 0.11, '': 0.03, 'improve': 0.03, 'height': 0.02, '______': 0.02}	0	0.108887	0	1	context	context|target	0.53	TRUE	TRUE	TRUE	target	{'enhance': 0.53, 'enhancement': 0.5}
Verbal & Grammatical Forms	verb_inf_3pSg	avoids is to avoid as includes is to	include	include	0.11	1	1	{'include': 0.11, 'exclude': 0.05, 'avoid': 0.04, 'have': 0.04, 'includes': 0.03}	0	0.109863	0	1	context	context|target	0.53	TRUE	TRUE	TRUE	target	{'include': 0.53, 'includes': 0.51}
Verbal & Grammatical Forms	verb_inf_3pSg	follow is to follows as include is to	includes		0.1	0	1	{'': 0.04, 'includes': 0.1, 'include': 0.08, '?': 0.05}	1	0.0976562	0.00634766	0.99999	context	context|target	0.53	TRUE	TRUE	TRUE	target	{'includes': 0.53, 'include': 0.51}
Verbal & Grammatical Forms	verb_inf_3pSg	achieve is to achieves as ask is to	asks	asks	0.1	1	1	{'asks': 0.1, '': 0.04, 'ask': 0.06, '?': 0.05}	0	0.100586	0	1	context	context|target	0.53	TRUE	TRUE	TRUE	target	{'asks': 0.53, 'ask': 0.48}
Morphological Modifiers	verb+able_reg	foresee is to foreseeable as rely is to	reliable	reliable	0.09	1	1	{'reliable': 0.09, '______': 0.09, '': 0.06, '?': 0.06}	0	0.0922852	0	1	context	context|target	0.53	TRUE	TRUE	TRUE	target	{'reliable': 0.53, 'rely': 0.51}
Morphological Modifiers	verb+ment_irreg	agreement is to agree as equipment is to	equip	agreement	0.09	0	1	{'agreement': 0.09, 'equip': 0.07, 'agree': 0.07, 'equipment': 0.05, 'use': 0.03}	1	0.0708008	0.0146484	0.99999	context	context|target	0.53	TRUE	TRUE	TRUE	target	{'equip': 0.53, 'equipment': 0.48}
Morphological Modifiers	verb+ment_irreg	encourage is to encouragement as invest is to	investment	investment	0.09	1	1	{'investment': 0.09, '': 0.08, '______': 0.05, '__': 0.05, '?': 0.04}	0	0.0927734	0	1	context	context|target	0.53	TRUE	TRUE	TRUE	target	{'investment': 0.53, 'invest': 0.48}
Verbal & Grammatical Forms	verb_inf_Ved	provide is to provided as replace is to	replaced	?	0.09	0	1	{'?': 0.04, '': 0.04, 'replaced': 0.06}	2	0.0639648	0.0234375	0.99998	context	context|target	0.53	TRUE	TRUE	TRUE	target	{'replaced': 0.53, 'replace': 0.49}
Verbal & Grammatical Forms	verb_inf_Ving	improve is to improving as require is to	requiring	?	0.09	0	1	{'?': 0.04, '': 0.05, 'requiring': 0.04}	3	0.0439453	0.043457	0.99997	context	context|target	0.53	TRUE	TRUE	TRUE	target	{'requiring': 0.53, 'require': 0.47}
Morphological Modifiers	verb+ment_irreg	assessment is to assess as investment is to	invest	invest	0.08	1	1	{'invest': 0.08, 'spend': 0.03, 'save': 0.03, 'capital': 0.02, '': 0.02}	0	0.0786133	0	1	context	context|target	0.53	TRUE	TRUE	TRUE	target	{'invest': 0.53, 'investment': 0.5}
Verbal & Grammatical Forms	verb_inf_3pSg	avoid is to avoids as remain is to	remains	remain	0.08	0.5	1	{'remain': 0.08, 'remains': 0.06, '': 0.06, '______': 0.04, 'stays': 0.04}	1	0.0612793	0.017334	0.99999	context	context|target	0.53	TRUE	TRUE	TRUE	target	{'remains': 0.53, 'remain': 0.5}
Verbal & Grammatical Forms	verb_inf_3pSg	provides is to provide as sends is to	send	receive	0.08	0	1	{'receive': 0.08, 'provide': 0.06, 'send': 0.05, 'provides': 0.04, 'receives': 0.04}	2	0.0544434	0.0246582	0.99998	context	context|target	0.53	TRUE	TRUE	TRUE	target	{'send': 0.53, 'sends': 0.49}
Verbal & Grammatical Forms	verb_inf_3pSg	prevents is to prevent as sends is to	send	prevents	0.08	0	1	{'prevents': 0.08, 'sent': 0.07, 'sends': 0.07, 'receives': 0.04, 'send': 0.03}	4	0.0344238	0.0427246	0.99996	context	context|target	0.53	TRUE	TRUE	TRUE	target	{'send': 0.53, 'sends': 0.49}
Morphological Modifiers	verb+ment_irreg	advertisement is to advertise as embarrassment is to	embarrass	shame	0.07	0	1	{'shame': 0.07, 'embarrassment': 0.05, 'embarrass': 0.02, 'be': 0.02, '': 0.02}	2	0.0246582	0.0466309	0.99998	context	context|target	0.53	TRUE	TRUE	TRUE	target	{'embarrass': 0.53, 'embarrassment': 0.46}
Verbal & Grammatical Forms	verb_Ving_3pSg	publishing is to publishes as requiring is to	requires		0.07	0	1	{'': 0.05, '______': 0.04, '__': 0.03, 'requires': 0.03}	4	0.0285645	0.0441895	0.99996	context	context|target	0.53	TRUE	TRUE	TRUE	target	{'requires': 0.53, 'requiring': 0.5}
Verbal & Grammatical Forms	verb_Ving_3pSg	developing is to develops as relating is to	relates	relates	0.07	1	1	{'relates': 0.07, 'related': 0.06, '______': 0.06, 'relate': 0.04, '': 0.03}	0	0.0712891	0	1	context	context|target	0.53	TRUE	TRUE	TRUE	target	{'relates': 0.53, 'relating': 0.49}
Verbal & Grammatical Forms	verb_inf_Ving	add is to adding as enjoy is to	enjoying		0.04	0	1	{'': 0.04, '?': 0.04, '______': 0.04, 'enjoying': 0.03, ':': 0.03}	4	0.0339355	0.00952148	0.99996	context	context|target	0.53	TRUE	TRUE	TRUE	target	{'enjoying': 0.53, 'enjoy': 0.5}
Factual Knowledge	country_capital	Denmark is to Copenhagen as Bangladesh is to	dhaka	Dh	0.64	0.5	0.5	{'Dh': 0.64, '______': 0.03, 'what': 0.02, 'Ch': 0.02, '__': 0.02}	0	0.640625	0	1	context	context|target	0.53	TRUE	TRUE	TRUE	target	{'dhaka': 0.53, 'bangladesh': 0.48}
Factual Knowledge	capital_world	Denmark is to Copenhagen as Bangladesh is to	dhaka	Dh	0.64	0.5	0.5	{'Dh': 0.64, '______': 0.03, 'what': 0.02, 'Ch': 0.02, '__': 0.02}	0	0.640625	0	1	context	context|target	0.53	TRUE	TRUE	TRUE	target	{'dhaka': 0.53, 'bangladesh': 0.48}
Factual Knowledge	capital_world	Iran is to Tehran as Malta is to	valletta	Val	0.54	0.5	0.5	{'Val': 0.54, 'Va': 0.07, '__': 0.04, '______': 0.04, '': 0.01}	0	0.539062	0	1	context	context|target	0.53	TRUE	TRUE	TRUE	target	{'valletta': 0.53, 'malta': 0.49}
Morphological Modifiers	noun+less_reg	emotion is to emotionless as soul is to	soulless	soul	0.49	0.5	0.5	{'soul': 0.49, '______': 0.03, 'sou': 0.03, '__': 0.02, '"': 0.02}	0	0.494141	0	1	context	context|target	0.53	TRUE	TRUE	TRUE	target	{'soulless': 0.53, 'soul': 0.5}
Morphological Modifiers	re+verb_reg	configure is to reconfigure as publish is to	republish	publish	0.48	0	0.5	{'publish': 0.48, 'subscribe': 0.08, 'commit': 0.04, 'rep': 0.01, '': 0.01}	3	0.0134888	0.463074	0.99997	context	context|target	0.53	TRUE	TRUE	TRUE	target	{'republish': 0.53, 'publish': 0.5}
Morphological Modifiers	noun+less_reg	god is to godless as window is to	windowless	window	0.27	0.5	0.5	{'window': 0.27, '______': 0.11, 'wind': 0.04, 'win': 0.04, '__': 0.03}	0	0.273438	0	1	context	context|target	0.53	TRUE	TRUE	TRUE	target	{'windowless': 0.53, 'window': 0.48}
Factual Knowledge	capital_world	Egypt is to Cairo as Rwanda is to	kigali	K	0.22	0.5	0.5	{'K': 0.22, '______': 0.07, '__': 0.05, ':': 0.04, '_____': 0.03}	645	2.65837e-05	0.218723	0.993573	context	context|target	0.53	TRUE	TRUE	TRUE	target	{'kigali': 0.53, 'rwanda': 0.49}
Factual Knowledge	capital_world	Egypt is to Cairo as Zambia is to	lusaka	L	0.21	0.5	0.5	{'L': 0.21, '?': 0.06, '__': 0.04, 'what': 0.04, ':': 0.04}	174	0.000265121	0.212626	0.998266	context	context|target	0.53	TRUE	TRUE	TRUE	target	{'lusaka': 0.53, 'zambia': 0.49}
Verbal & Grammatical Forms	verb_Ving_3pSg	developing is to develops as publishing is to	publishes	publish	0.18	0.5	0.5	{'publish': 0.18, '______': 0.06, '__': 0.06, 'develop': 0.04, '': 0.03}	5	0.0324707	0.143311	0.99995	context	context|target	0.53	TRUE	TRUE	TRUE	target	{'publishes': 0.53, 'publishing': 0.49}
Factual Knowledge	country_capital	Thailand is to Bangkok as Serbia is to	belgrade	Bel	0.17	0.5	0.5	{'Bel': 0.17, '__': 0.09, '______': 0.09, ':': 0.04}	0	0.172852	0	1	context	context|target	0.53	TRUE	TRUE	TRUE	target	{'belgrade': 0.53, 'serbia': 0.49}
Factual Knowledge	capital_world	Thailand is to Bangkok as Serbia is to	belgrade	Bel	0.17	0.5	0.5	{'Bel': 0.17, '__': 0.09, '______': 0.09, ':': 0.04}	0	0.172852	0	1	context	context|target	0.53	TRUE	TRUE	TRUE	target	{'belgrade': 0.53, 'serbia': 0.49}
Verbal & Grammatical Forms	verb_inf_3pSg	achieve is to achieves as improve is to	improves	improve	0.17	0.5	0.5	{'improve': 0.17, '': 0.05, '______': 0.05, '__': 0.03}	45	0.00357056	0.168304	0.999552	context	context|target	0.53	TRUE	TRUE	TRUE	target	{'improves': 0.53, 'improve': 0.48}
Verbal & Grammatical Forms	verb_Ving_Ved	existed is to existing as located is to	locating	exist	0.15	0	0.5	{'exist': 0.15, 'located': 0.09, 'being': 0.07, 'loc': 0.06, 'un': 0.06}	7	0.0441895	0.110107	0.99993	context	context|target	0.53	TRUE	TRUE	TRUE	target	{'locating': 0.53, 'located': 0.46}
Morphological Modifiers	noun+less_reg	art is to artless as heart is to	heartless	______	0.11	0	0.5	{'______': 0.11, 'heart': 0.06, '____': 0.05, '__': 0.05, '_': 0.04}	1	0.0568848	0.0563965	0.99999	context	context|target	0.53	TRUE	TRUE	TRUE	target	{'heartless': 0.53, 'heart': 0.48}
Verbal & Grammatical Forms	verb_Ving_3pSg	appearing is to appears as spending is to	spends	save	0.1	0	0.5	{'save': 0.1, 'appear': 0.07, 'spent': 0.05, 'spend': 0.05, 'earn': 0.04}	26	0.0057373	0.0899658	0.999741	context	context|target	0.53	TRUE	TRUE	TRUE	target	{'spends': 0.53, 'spending': 0.46}
Morphological Modifiers	adj+ly_reg	serious is to seriously as strong is to	strongly	?	0.05	0	0.5	{'?': 0.05, 'weak': 0.04, 'strong': 0.04, 'A': 0.04, '': 0.03}	7	0.0308838	0.0198975	0.99993	context	context|target	0.53	TRUE	TRUE	TRUE	target	{'strongly': 0.53, 'strong': 0.48}
Verbal & Grammatical Forms	verb_Ving_3pSg	relates is to relating as requires is to	requiring	requires	0.55	0	0	{'requires': 0.55, 'requirement': 0.04, 'necess': 0.03, 'required': 0.02, 'require': 0.02}	5	0.0164795	0.530396	0.99995	context	context|target	0.53	TRUE	TRUE	TRUE	target	{'requiring': 0.53, 'requires': 0.49}
Morphological Modifiers	re+verb_reg	arrange is to rearrange as configure is to	reconfigure	configure	0.3	0	0	{'configure': 0.3, 'arrange': 0.07, '': 0.03, 'what': 0.03}	33	0.00360107	0.301086	0.999671	context	context|target	0.53	TRUE	TRUE	TRUE	target	{'reconfigure': 0.53, 'configure': 0.51}
Verbal & Grammatical Forms	verb_inf_3pSg	prevent is to prevents as remain is to	remains		0.24	0	0	{'': 0.04, '?': 0.07}	77	0.000991821	0.242172	0.999233	context	context|target	0.53	TRUE	TRUE	TRUE	target	{'remains': 0.53, 'remain': 0.49}
Verbal & Grammatical Forms	verb_Ving_3pSg	developing is to develops as sitting is to	sits	standing	0.22	0	0	{'standing': 0.22, 'walking': 0.19, 'running': 0.09, 'stand': 0.07, 'moving': 0.04}	142	0.000282288	0.219444	0.998585	context	context|target	0.53	TRUE	TRUE	TRUE	target	{'sits': 0.53, 'sitting': 0.49}
Morphological Modifiers	verb+ment_irreg	engage is to engagement as equip is to	equipment	______	0.21	0	0	{'______': 0.21, '__': 0.09, '': 0.04, '____': 0.03}	11	0.0158691	0.190186	0.99989	context	context|target	0.53	TRUE	TRUE	TRUE	target	{'equipment': 0.53, 'equip': 0.48}
Verbal & Grammatical Forms	verb_inf_3pSg	agree is to agrees as send is to	sends		0.18	0	0	{'': 0.07, '?': 0.04, ':': 0.04}	10	0.0180664	0.163574	0.9999	context	context|target	0.53	TRUE	TRUE	TRUE	target	{'sends': 0.53, 'send': 0.49}
Morphological Modifiers	verb+er_irreg	follower is to follow as loser is to	lose	win	0.16	0	0	{'win': 0.16, 'loser': 0.14, 'winner': 0.11, '______': 0.06, 'what': 0.03}	18	0.00616455	0.153015	0.999821	context	context|target	0.53	TRUE	TRUE	TRUE	target	{'lose': 0.53, 'loser': 0.5}
Verbal & Grammatical Forms	verb_Ving_3pSg	develops is to developing as requires is to	requiring	requires	0.16	0	0	{'requires': 0.16, '': 0.03, '______': 0.03, '__': 0.02}	19	0.00891113	0.148315	0.999811	context	context|target	0.53	TRUE	TRUE	TRUE	target	{'requiring': 0.53, 'requires': 0.5}
Verbal & Grammatical Forms	plural	eagles is to eagle as women is to	woman	women	0.14	0	0	{'women': 0.14, '______': 0.09, '_____': 0.06, '____': 0.04, '__': 0.03}	6	0.0252686	0.11145	0.99994	context	context|target	0.53	TRUE	TRUE	TRUE	target	{'woman': 0.53, 'women': 0.5}
Verbal & Grammatical Forms	verb_Ving_3pSg	publishes is to publishing as requires is to	requiring	requires	0.12	0	0	{'requires': 0.12, 'requirement': 0.05, '': 0.03, 'dependency': 0.03}	10	0.0107422	0.10498	0.9999	context	context|target	0.53	TRUE	TRUE	TRUE	target	{'requiring': 0.53, 'requires': 0.5}
Verbal & Grammatical Forms	verb_inf_3pSg	achieve is to achieves as provide is to	provides		0.12	0	0	{'': 0.04, '______': 0.04, ':': 0.04}	15	0.0158691	0.109131	0.999851	context	context|target	0.53	TRUE	TRUE	TRUE	target	{'provides': 0.53, 'provide': 0.48}
Morphological Modifiers	verb+able_reg	deliver is to deliverable as execute is to	executable		0.11	0	0	{'': 0.09, ':': 0.03, '?': 0.04}	9	0.0238037	0.0865479	0.99991	context	context|target	0.53	TRUE	TRUE	TRUE	target	{'executable': 0.53, 'execute': 0.48}
Morphological Modifiers	adj+ly_reg	extensively is to extensive as seriously is to	serious	______	0.11	0	0	{'______': 0.11, 'seriously': 0.09, '': 0.05, 'A': 0.04}	34	0.00390625	0.103516	0.999661	context	context|target	0.53	TRUE	TRUE	TRUE	target	{'serious': 0.53, 'seriously': 0.52}
Morphological Modifiers	adj_comparative	angry is to angrier as dense is to	denser		0.09	0	0	{'': 0.07, '?': 0.07, ':': 0.07, '______': 0.06}	11	0.0247803	0.0616455	0.99989	context	context|target	0.53	TRUE	TRUE	TRUE	target	{'denser': 0.53, 'dense': 0.49}
Morphological Modifiers	verb+er_irreg	lose is to loser as organise is to	organiser	?	0.09	0	0	{'?': 0.06, '': 0.05, '_': 0.07}	6	0.0322266	0.0610352	0.99994	context	context|target	0.53	TRUE	TRUE	TRUE	target	{'organiser': 0.53, 'organise': 0.49}
Morphological Modifiers	adj_comparative	angry is to angrier as strong is to	stronger		0.08	0	0	{'': 0.06, '______': 0.06, '?': 0.06, 'a': 0.05}	7	0.0461426	0.0300293	0.99993	context	context|target	0.53	TRUE	TRUE	TRUE	target	{'stronger': 0.53, 'strong': 0.48}
Verbal & Grammatical Forms	verb_inf_Ved	reduce is to reduced as seem is to	seemed	______	0.08	0	0	{'______': 0.08, '?': 0.08, 'seen': 0.06, '__': 0.04, '': 0.04}	31	0.00518799	0.0758667	0.999691	context	context|target	0.53	TRUE	TRUE	TRUE	target	{'seemed': 0.53, 'seem': 0.46}
Verbal & Grammatical Forms	verb_inf_Ving	ask is to asking as improve is to	improving	?	0.06	0	0	{'?': 0.06, '____': 0.04, '______': 0.04, 'what': 0.03, '': 0.03}	126	0.00104523	0.0597458	0.998744	context	context|target	0.53	TRUE	TRUE	TRUE	target	{'improving': 0.53, 'improve': 0.5}
Factual Knowledge	capital_world	Valletta is to Malta as Beirut is to	lebanon	Lebanon	0.97	1	1	{'Lebanon': 0.97, 'the': 0.01, 'Beirut': 0.0, '': 0.0, 'Syria': 0.0}	0	0.96875	0	1	context	context|target	0.52	TRUE	TRUE	TRUE	target	{'lebanon': 0.52, 'beirut': 0.48}
Semantic Relations	male_female	goddess is to god as poetess is to	poet	poet	0.97	1	1	{'poet': 0.97, '': 0.0, 'what': 0.0}	0	0.972656	0	1	context	context|target	0.52	TRUE	TRUE	TRUE	target	{'poet': 0.52, 'poetess': 0.47}
Verbal & Grammatical Forms	verb_inf_3pSg	contains is to contain as remains is to	remain	remain	0.96	1	1	{'remain': 0.96, 'stay': 0.01, 'remaining': 0.0, 'be': 0.0, 'remainder': 0.0}	0	0.960938	0	1	context	context|target	0.52	TRUE	TRUE	TRUE	target	{'remain': 0.52, 'remains': 0.48}
Factual Knowledge	capital_world	Nicosia is to Cyprus as Ottawa is to	canada	Canada	0.95	1	1	{'Canada': 0.95, '__': 0.0, 'North': 0.0, 'Ontario': 0.0, 'the': 0.0}	0	0.949219	0	1	context	context|target	0.52	TRUE	TRUE	TRUE	target	{'canada': 0.52, 'ottawa': 0.5}
Morphological Modifiers	noun+less_reg	godless is to god as lawless is to	law	law	0.95	1	1	{'law': 0.95, 'laws': 0.01, 'lawful': 0.01, 'the': 0.01, '': 0.0}	0	0.953125	0	1	context	context|target	0.52	TRUE	TRUE	TRUE	target	{'law': 0.52, 'lawless': 0.49}
Factual Knowledge	capital_world	Valletta is to Malta as Baghdad is to	iraq	Iraq	0.93	1	1	{'Iraq': 0.93, 'the': 0.01, 'Mes': 0.01, 'Iran': 0.01, '': 0.0}	0	0.925781	0	1	context	context|target	0.52	TRUE	TRUE	TRUE	target	{'iraq': 0.52, 'baghdad': 0.48}
Factual Knowledge	country_capital	Damascus is to Syria as Kingston is to	jamaica	Jamaica	0.91	1	1	{'Jamaica': 0.91, 'what': 0.01, '__': 0.01, 'Canada': 0.01, '______': 0.0}	0	0.914062	0	1	context	context|target	0.52	TRUE	TRUE	TRUE	target	{'jamaica': 0.52, 'kingston': 0.49}
Factual Knowledge	capital_world	Damascus is to Syria as Kingston is to	jamaica	Jamaica	0.91	1	1	{'Jamaica': 0.91, 'what': 0.01, '__': 0.01, 'Canada': 0.01, '______': 0.0}	0	0.914062	0	1	context	context|target	0.52	TRUE	TRUE	TRUE	target	{'jamaica': 0.52, 'kingston': 0.49}
Morphological Modifiers	verb+ment_irreg	encouragement is to encourage as equipment is to	equip	equip	0.87	1	1	{'equip': 0.87, 'prepare': 0.04, '': 0.01, 'use': 0.01}	0	0.871094	0	1	context	context|target	0.52	TRUE	TRUE	TRUE	target	{'equip': 0.52, 'equipment': 0.49}
Verbal & Grammatical Forms	verb_Ving_3pSg	referring is to refers as requiring is to	requires	requires	0.86	1	1	{'requires': 0.86, 'require': 0.06, 'requirements': 0.01, 'required': 0.01, 'requiring': 0.01}	0	0.863281	0	1	context	context|target	0.52	TRUE	TRUE	TRUE	target	{'requires': 0.52, 'requiring': 0.51}
Morphological Modifiers	re+verb_reg	reorganize is to organize as republish is to	publish	publish	0.85	1	1	{'publish': 0.85, '__': 0.02, '': 0.01, 'rep': 0.01}	0	0.847656	0	1	context	context|target	0.52	TRUE	TRUE	TRUE	target	{'publish': 0.52, 'republish': 0.5}
Verbal & Grammatical Forms	verb_inf_Ving	continuing is to continue as enjoying is to	enjoy	enjoy	0.83	1	1	{'enjoy': 0.83, 'continue': 0.04, 'be': 0.02, 'stop': 0.01, 'have': 0.01}	0	0.828125	0	1	context	context|target	0.52	TRUE	TRUE	TRUE	target	{'enjoy': 0.52, 'enjoying': 0.51}
Verbal & Grammatical Forms	verb_inf_Ving	continuing is to continue as reducing is to	reduce	reduce	0.83	1	1	{'reduce': 0.83, 'continue': 0.02, 'stop': 0.01, 'lose': 0.01, 'be': 0.01}	0	0.828125	0	1	context	context|target	0.52	TRUE	TRUE	TRUE	target	{'reduce': 0.52, 'reducing': 0.47}
Morphological Modifiers	re+verb_reg	rearrange is to arrange as reexamine is to	examine	examine	0.82	1	1	{'examine': 0.82, '': 0.02, 'exam': 0.01, 'to': 0.01}	0	0.816406	0	1	context	context|target	0.52	TRUE	TRUE	TRUE	target	{'examine': 0.52, 'reexamine': 0.48}
Verbal & Grammatical Forms	verb_inf_3pSg	contains is to contain as sends is to	send	send	0.82	1	1	{'send': 0.82, 'sent': 0.05, 'receive': 0.01, 'contain': 0.01, '______': 0.01}	0	0.816406	0	1	context	context|target	0.52	TRUE	TRUE	TRUE	target	{'send': 0.52, 'sends': 0.5}
Verbal & Grammatical Forms	verb_inf_3pSg	occurs is to occur as prevents is to	prevent	prevent	0.82	1	1	{'prevent': 0.82, 'prevents': 0.03, 'occur': 0.02, 'be': 0.01, 'pre': 0.01}	0	0.816406	0	1	context	context|target	0.52	TRUE	TRUE	TRUE	target	{'prevent': 0.52, 'prevents': 0.5}
Morphological Modifiers	noun+less_reg	artless is to art as soulless is to	soul	soul	0.81	1	1	{'soul': 0.81, '____': 0.03, '______': 0.01, '__': 0.01, '_____': 0.01}	0	0.808594	0	1	context	context|target	0.52	TRUE	TRUE	TRUE	target	{'soul': 0.52, 'soulless': 0.5}
Morphological Modifiers	verb+er_irreg	announcer is to announce as interpreter is to	interpret	interpret	0.81	1	1	{'interpret': 0.81, 'translate': 0.08, 'speak': 0.01, '__': 0.0, '': 0.0}	0	0.808594	0	1	context	context|target	0.52	TRUE	TRUE	TRUE	target	{'interpret': 0.52, 'interpreter': 0.48}
Verbal & Grammatical Forms	verb_inf_3pSg	agrees is to agree as includes is to	include	include	0.81	1	1	{'include': 0.81, 'includes': 0.05, 'contain': 0.01, 'including': 0.01, 'includ': 0.01}	0	0.808594	0	1	context	context|target	0.52	TRUE	TRUE	TRUE	target	{'include': 0.52, 'includes': 0.48}
Morphological Modifiers	noun+less_reg	artless is to art as childless is to	child	child	0.8	1	1	{'child': 0.8, '______': 0.02, '____': 0.02, '__': 0.01, 'children': 0.01}	0	0.804688	0	1	context	context|target	0.52	TRUE	TRUE	TRUE	target	{'child': 0.52, 'childless': 0.51}
Verbal & Grammatical Forms	verb_inf_3pSg	continues is to continue as prevents is to	prevent	prevent	0.8	1	1	{'prevent': 0.8, 'prevents': 0.08, 'prevented': 0.01, '': 0.01, 'prevention': 0.0}	0	0.804688	0	1	context	context|target	0.52	TRUE	TRUE	TRUE	target	{'prevent': 0.52, 'prevents': 0.5}
Verbal & Grammatical Forms	verb_inf_Ved	became is to become as received is to	receive	receive	0.8	1	1	{'receive': 0.8, 'be': 0.09, 'become': 0.03, 'received': 0.01, 'have': 0.01}	0	0.800781	0	1	context	context|target	0.52	TRUE	TRUE	TRUE	target	{'receive': 0.52, 'received': 0.49}
Morphological Modifiers	noun+less_reg	godless is to god as speechless is to	speech	speech	0.78	1	1	{'speech': 0.78, 'speak': 0.07, 'speaker': 0.01, 'talk': 0.01, 'word': 0.01}	0	0.777344	0	1	context	context|target	0.52	TRUE	TRUE	TRUE	target	{'speech': 0.52, 'speechless': 0.49}
Verbal & Grammatical Forms	verb_inf_Ved	announce is to announced as tell is to	told	told	0.78	1	1	{'told': 0.78, 'tell': 0.03, '': 0.01, 'tells': 0.01, '__': 0.01}	0	0.78125	0	1	context	context|target	0.52	TRUE	TRUE	TRUE	target	{'told': 0.52, 'tell': 0.49}
Morphological Modifiers	noun+less_reg	godless is to god as remorseless is to	remorse	remorse	0.77	1	1	{'remorse': 0.77, 'regret': 0.03, 'repent': 0.01, '______': 0.01, 'mercy': 0.01}	0	0.765625	0	1	context	context|target	0.52	TRUE	TRUE	TRUE	target	{'remorse': 0.52, 'remorseless': 0.48}
Morphological Modifiers	noun+less_reg	godless is to god as spineless is to	spine	spine	0.77	1	1	{'spine': 0.77, 'sp': 0.03, 'spinal': 0.03, 'vert': 0.02, 'verte': 0.01}	0	0.773438	0	1	context	context|target	0.52	TRUE	TRUE	TRUE	target	{'spine': 0.52, 'spineless': 0.48}
Verbal & Grammatical Forms	verb_Ving_Ved	containing is to contained as involving is to	involved	involved	0.77	1	1	{'involved': 0.77, '': 0.02, '______': 0.01, 'involvement': 0.01, 'invol': 0.01}	0	0.769531	0	1	context	context|target	0.52	TRUE	TRUE	TRUE	target	{'involved': 0.52, 'involving': 0.49}
Factual Knowledge	capital_world	Oslo is to Norway as Athens is to	greece	Greece	0.76	1	1	{'Greece': 0.76, '__': 0.04, '______': 0.03, '_____': 0.01, 'what': 0.01}	0	0.761719	0	1	context	context|target	0.52	TRUE	TRUE	TRUE	target	{'greece': 0.52, 'athens': 0.49}
Verbal & Grammatical Forms	verb_inf_Ved	became is to become as believed is to	believe	believe	0.76	1	1	{'believe': 0.76, 'become': 0.12, 'be': 0.04, '': 0.01, 'belief': 0.0}	0	0.757812	0	1	context	context|target	0.52	TRUE	TRUE	TRUE	target	{'believe': 0.52, 'believed': 0.48}
Morphological Modifiers	verb+able_reg	explainable is to explain as imaginable is to	imagine	imagine	0.75	1	1	{'imagine': 0.75, 'understand': 0.02, 'conceive': 0.02, 'image': 0.01, 'see': 0.01}	0	0.75	0	1	context	context|target	0.52	TRUE	TRUE	TRUE	target	{'imagine': 0.52, 'imaginable': 0.49}
Verbal & Grammatical Forms	verb_inf_Ved	identify is to identified as reduce is to	reduced	reduced	0.75	1	1	{'reduced': 0.75, 'reduction': 0.03, 'reduce': 0.01, 'reduces': 0.01, 'identified': 0.01}	0	0.746094	0	1	context	context|target	0.52	TRUE	TRUE	TRUE	target	{'reduced': 0.52, 'reduce': 0.5}
Verbal & Grammatical Forms	verb_inf_3pSg	continues is to continue as improves is to	improve	improve	0.74	1	1	{'improve': 0.74, 'get': 0.02, 'continue': 0.01, '': 0.01, 'be': 0.01}	0	0.738281	0	1	context	context|target	0.52	TRUE	TRUE	TRUE	target	{'improve': 0.52, 'improves': 0.48}
Verbal & Grammatical Forms	verb_inf_Ving	continuing is to continue as encouraging is to	encourage	encourage	0.74	1	1	{'encourage': 0.74, 'discourage': 0.12, 'continue': 0.03, 'be': 0.01, 'give': 0.01}	0	0.742188	0	1	context	context|target	0.52	TRUE	TRUE	TRUE	target	{'encourage': 0.52, 'encouraging': 0.49}
Morphological Modifiers	verb+ment_irreg	commit is to commitment as invest is to	investment	investment	0.73	1	1	{'investment': 0.73, '__': 0.03, 'investor': 0.03, '______': 0.02, 'involvement': 0.01}	0	0.730469	0	1	context	context|target	0.52	TRUE	TRUE	TRUE	target	{'investment': 0.52, 'invest': 0.5}
Morphological Modifiers	verb+able_reg	recommend is to recommendable as rely is to	reliable	reliable	0.73	1	1	{'reliable': 0.73, 'reliant': 0.07, '______': 0.02, '': 0.01, 'rely': 0.01}	0	0.734375	0	1	context	context|target	0.52	TRUE	TRUE	TRUE	target	{'reliable': 0.52, 'rely': 0.5}
Morphological Modifiers	verb+tion_irreg	degradation is to degrade as determination is to	determine	determine	0.73	1	1	{'determine': 0.73, 'decide': 0.03, 'deter': 0.02, '': 0.02, 'determin': 0.01}	0	0.726562	0	1	context	context|target	0.52	TRUE	TRUE	TRUE	target	{'determine': 0.52, 'determination': 0.48}
Morphological Modifiers	noun+less_reg	artless is to art as spineless is to	spine	spine	0.73	1	1	{'spine': 0.73, 'spinal': 0.03, 'sp': 0.02, '______': 0.02, '____': 0.01}	0	0.730469	0	1	context	context|target	0.52	TRUE	TRUE	TRUE	target	{'spine': 0.52, 'spineless': 0.49}
Verbal & Grammatical Forms	verb_inf_3pSg	believes is to believe as includes is to	include	include	0.73	1	1	{'include': 0.73, 'be': 0.07, 'contain': 0.03, 'exclude': 0.01, 'includes': 0.01}	0	0.730469	0	1	context	context|target	0.52	TRUE	TRUE	TRUE	target	{'include': 0.52, 'includes': 0.51}
Verbal & Grammatical Forms	verb_Ving_Ved	including is to included as receiving is to	received	received	0.73	1	1	{'received': 0.73, 'include': 0.03, 'receive': 0.02, 'given': 0.02, 'including': 0.02}	0	0.730469	0	1	context	context|target	0.52	TRUE	TRUE	TRUE	target	{'received': 0.52, 'receiving': 0.48}
Verbal & Grammatical Forms	verb_inf_Ved	accept is to accepted as develop is to	developed	developed	0.72	1	1	{'developed': 0.72, 'development': 0.05, 'developer': 0.02, '__': 0.02, '______': 0.01}	0	0.722656	0	1	context	context|target	0.52	TRUE	TRUE	TRUE	target	{'developed': 0.52, 'develop': 0.5}
Verbal & Grammatical Forms	verb_Ving_Ved	existing is to existed as replacing is to	replaced	replaced	0.72	1	1	{'replaced': 0.72, 'replace': 0.06, 'be': 0.02, 'to': 0.02, 'replacing': 0.01}	0	0.71875	0	1	context	context|target	0.52	TRUE	TRUE	TRUE	target	{'replaced': 0.52, 'replacing': 0.47}
Morphological Modifiers	adj_superlative	dumbest is to dumb as healthiest is to	healthy	healthy	0.71	1	1	{'healthy': 0.71, 'health': 0.12, '______': 0.01, 'unhealthy': 0.01, 'smart': 0.01}	0	0.707031	0	1	context	context|target	0.52	TRUE	TRUE	TRUE	target	{'healthy': 0.52, 'healthiest': 0.51}
Morphological Modifiers	noun+less_reg	godless is to god as homeless is to	home	home	0.71	1	1	{'home': 0.71, 'house': 0.21, 'homeless': 0.01, '': 0.01, 'a': 0.01}	0	0.714844	0	1	context	context|target	0.52	TRUE	TRUE	TRUE	target	{'home': 0.52, 'homeless': 0.48}
Morphological Modifiers	noun+less_reg	lawless is to law as soulless is to	soul	soul	0.71	1	1	{'soul': 0.71, 'spirit': 0.06, '____': 0.04, '______': 0.02, '_____': 0.02}	0	0.707031	0	1	context	context|target	0.52	TRUE	TRUE	TRUE	target	{'soul': 0.52, 'soulless': 0.49}
Verbal & Grammatical Forms	verb_inf_Ved	identify is to identified as spend is to	spent	spent	0.71	1	1	{'spent': 0.71, 'spend': 0.03, '______': 0.02, 'expended': 0.02, '__': 0.02}	0	0.707031	0	1	context	context|target	0.52	TRUE	TRUE	TRUE	target	{'spent': 0.52, 'spend': 0.48}
Factual Knowledge	capital_world	Banjul is to Gambia as Copenhagen is to	denmark	Denmark	0.7	1	1	{'Denmark': 0.7, ':': 0.03, '__': 0.03, 'what': 0.03, '______': 0.02}	0	0.699219	0	1	context	context|target	0.52	TRUE	TRUE	TRUE	target	{'denmark': 0.52, 'copenhagen': 0.51}
Factual Knowledge	capital_world	Madrid is to Spain as London is to	england	England	0.7	1	1	{'England': 0.7, 'the': 0.07, 'Great': 0.04, 'Britain': 0.04, '______': 0.03}	0	0.699219	0	1	context	context|target	0.52	TRUE	TRUE	TRUE	target	{'england': 0.52, 'london': 0.49}
Factual Knowledge	country_capital	Athens is to Greece as Kingston is to	jamaica	Jamaica	0.69	1	1	{'Jamaica': 0.69, '__': 0.03, '______': 0.03, 'what': 0.02, '?': 0.01}	0	0.691406	0	1	context	context|target	0.52	TRUE	TRUE	TRUE	target	{'jamaica': 0.52, 'kingston': 0.5}
Morphological Modifiers	noun+less_reg	artless is to art as speechless is to	speech	speech	0.69	1	1	{'speech': 0.69, 'speak': 0.06, '____': 0.02, '______': 0.02, '__': 0.02}	0	0.691406	0	1	context	context|target	0.52	TRUE	TRUE	TRUE	target	{'speech': 0.52, 'speechless': 0.45}
Verbal & Grammatical Forms	verb_inf_3pSg	continues is to continue as reduces is to	reduce	reduce	0.69	1	1	{'reduce': 0.69, 'reduced': 0.13, 'continue': 0.03, 'reduces': 0.03, 'be': 0.01}	0	0.6875	0	1	context	context|target	0.52	TRUE	TRUE	TRUE	target	{'reduce': 0.52, 'reduces': 0.48}
Factual Knowledge	country_capital	Kingston is to Jamaica as London is to	england	England	0.68	1	1	{'England': 0.68, 'Britain': 0.12, 'the': 0.1, 'Great': 0.07, 'UK': 0.0}	0	0.683594	0	1	context	context|target	0.52	TRUE	TRUE	TRUE	target	{'england': 0.52, 'london': 0.49}
Factual Knowledge	capital_world	Kingston is to Jamaica as London is to	england	England	0.68	1	1	{'England': 0.68, 'Britain': 0.12, 'the': 0.1, 'Great': 0.07, 'UK': 0.0}	0	0.683594	0	1	context	context|target	0.52	TRUE	TRUE	TRUE	target	{'england': 0.52, 'london': 0.49}
Morphological Modifiers	re+verb_reg	reconfigure is to configure as reconnect is to	connect	reconnect	0.68	0	1	{'reconnect': 0.68, 're': 0.1, 'connect': 0.05, '': 0.01, 'restart': 0.01}	2	0.0495605	0.634033	0.99998	context	context|target	0.52	TRUE	TRUE	TRUE	target	{'connect': 0.52, 'reconnect': 0.48}
Verbal & Grammatical Forms	verb_Ving_Ved	creating is to created as understanding is to	understood	understood	0.68	1	1	{'understood': 0.68, 'understanding': 0.03, 'the': 0.02, 'what': 0.02, 'known': 0.01}	0	0.675781	0	1	context	context|target	0.52	TRUE	TRUE	TRUE	target	{'understood': 0.52, 'understanding': 0.48}
Factual Knowledge	country_capital	Iran is to Tehran as Japan is to	tokyo	Tokyo	0.67	1	1	{'Tokyo': 0.67, '______': 0.04, '__': 0.02, 'Japan': 0.02, '': 0.02}	0	0.671875	0	1	context	context|target	0.52	TRUE	TRUE	TRUE	target	{'tokyo': 0.52, 'japan': 0.48}
Factual Knowledge	capital_world	Iran is to Tehran as Japan is to	tokyo	Tokyo	0.67	1	1	{'Tokyo': 0.67, '______': 0.04, '__': 0.02, 'Japan': 0.02, '': 0.02}	0	0.671875	0	1	context	context|target	0.52	TRUE	TRUE	TRUE	target	{'tokyo': 0.52, 'japan': 0.48}
Morphological Modifiers	adj+ness_reg	obvious is to obviousness as serious is to	seriousness	seriousness	0.67	1	1	{'seriousness': 0.67, 'serious': 0.08, 'seriously': 0.02, 'ser': 0.02, 'humor': 0.01}	0	0.667969	0	1	context	context|target	0.52	TRUE	TRUE	TRUE	target	{'seriousness': 0.52, 'serious': 0.49}
Verbal & Grammatical Forms	verb_inf_Ving	enjoying is to enjoy as telling is to	tell	tell	0.67	1	1	{'tell': 0.67, 'enjoy': 0.02, 'understand': 0.02, 'be': 0.02, 'hear': 0.02}	0	0.667969	0	1	context	context|target	0.52	TRUE	TRUE	TRUE	target	{'tell': 0.52, 'telling': 0.47}
Verbal & Grammatical Forms	verb_3pSg_Ved	consists is to consisted as creates is to	created	created	0.67	1	1	{'created': 0.67, 'create': 0.14, 'creates': 0.03, '': 0.01, 'creation': 0.01}	0	0.667969	0	1	context	context|target	0.52	TRUE	TRUE	TRUE	target	{'created': 0.52, 'creates': 0.5}
Morphological Modifiers	verb+ment_irreg	announcement is to announce as assessment is to	assess	assess	0.66	1	1	{'assess': 0.66, 'evaluate': 0.02, 'asses': 0.02, '': 0.01}	0	0.664062	0	1	context	context|target	0.52	TRUE	TRUE	TRUE	target	{'assess': 0.52, 'assessment': 0.48}
Morphological Modifiers	noun+less_reg	godless is to god as guiltless is to	guilt	guilt	0.66	1	1	{'guilt': 0.66, 'guilty': 0.28, 'innocent': 0.0, '______': 0.0, 'blame': 0.0}	0	0.660156	0	1	context	context|target	0.52	TRUE	TRUE	TRUE	target	{'guilt': 0.52, 'guiltless': 0.47}
Morphological Modifiers	re+verb_reg	reconfigure is to configure as renegotiate is to	negotiate	renegot	0.66	0	1	{'renegot': 0.66, 'negotiate': 0.06, 're': 0.05, 'renew': 0.02, '': 0.01}	1	0.0649414	0.591309	0.99999	context	context|target	0.52	TRUE	TRUE	TRUE	target	{'negotiate': 0.52, 'renegotiate': 0.48}
Factual Knowledge	country_capital	Damascus is to Syria as London is to	england	England	0.65	1	1	{'England': 0.65, 'the': 0.12, 'Britain': 0.09, 'Great': 0.05, '______': 0.01}	0	0.648438	0	1	context	context|target	0.52	TRUE	TRUE	TRUE	target	{'england': 0.52, 'london': 0.49}
Factual Knowledge	capital_world	Damascus is to Syria as London is to	england	England	0.65	1	1	{'England': 0.65, 'the': 0.12, 'Britain': 0.09, 'Great': 0.05, '______': 0.01}	0	0.648438	0	1	context	context|target	0.52	TRUE	TRUE	TRUE	target	{'england': 0.52, 'london': 0.49}
Morphological Modifiers	noun+less_reg	artless is to art as hairless is to	hair	hair	0.65	1	1	{'hair': 0.65, '____': 0.06, '______': 0.04, '_____': 0.02, '__': 0.02}	0	0.652344	0	1	context	context|target	0.52	TRUE	TRUE	TRUE	target	{'hair': 0.52, 'hairless': 0.47}
Verbal & Grammatical Forms	verb_inf_Ving	expecting is to expect as maintaining is to	maintain	maintain	0.65	1	1	{'maintain': 0.65, 'expect': 0.03, 'keep': 0.02, 'be': 0.01, 'maintenance': 0.01}	0	0.652344	0	1	context	context|target	0.52	TRUE	TRUE	TRUE	target	{'maintain': 0.52, 'maintaining': 0.49}
Morphological Modifiers	noun+less_reg	godless is to god as ruthless is to	ruth	ruth	0.64	1	1	{'ruth': 0.64, 'ruthless': 0.12, '': 0.02, 'r': 0.02, 'Ruth': 0.01}	0	0.640625	0	1	context	context|target	0.52	TRUE	TRUE	TRUE	target	{'ruth': 0.52, 'ruthless': 0.47}
Morphological Modifiers	verb+er_irreg	announcer is to announce as teacher is to	teach	teach	0.64	1	1	{'teach': 0.64, 'instruct': 0.05, 'educate': 0.03, 'teacher': 0.02, '__': 0.02}	0	0.636719	0	1	context	context|target	0.52	TRUE	TRUE	TRUE	target	{'teach': 0.52, 'teacher': 0.5}
Verbal & Grammatical Forms	verb_inf_Ving	attending is to attend as improving is to	improve	improve	0.64	1	1	{'improve': 0.64, 'be': 0.11, '': 0.01, 'perfect': 0.01, 'improving': 0.01}	0	0.636719	0	1	context	context|target	0.52	TRUE	TRUE	TRUE	target	{'improve': 0.52, 'improving': 0.51}
Verbal & Grammatical Forms	verb_inf_3pSg	continues is to continue as protects is to	protect	protect	0.64	1	1	{'protect': 0.64, 'protects': 0.13, 'continue': 0.02, 'be': 0.01, '': 0.01}	0	0.640625	0	1	context	context|target	0.52	TRUE	TRUE	TRUE	target	{'protect': 0.52, 'protects': 0.49}
Verbal & Grammatical Forms	verb_inf_3pSg	accepts is to accept as sends is to	send	send	0.64	1	1	{'send': 0.64, 'sends': 0.06, 'receive': 0.04, 'accept': 0.01, 'sent': 0.01}	0	0.636719	0	1	context	context|target	0.52	TRUE	TRUE	TRUE	target	{'send': 0.52, 'sends': 0.5}
Factual Knowledge	capital_world	Valletta is to Malta as Algiers is to	algeria	Algeria	0.63	1	1	{'Algeria': 0.63, '______': 0.04, '__': 0.04, 'Alg': 0.02, 'what': 0.02}	0	0.628906	0	1	context	context|target	0.52	TRUE	TRUE	TRUE	target	{'algeria': 0.52, 'algiers': 0.48}
Morphological Modifiers	noun+less_reg	godless is to god as sensorless is to	sensor	sense	0.63	0	1	{'sense': 0.63, 'sensor': 0.2, 'sensory': 0.03, 'sentient': 0.01, 'senses': 0.01}	1	0.199219	0.433594	0.99999	context	context|target	0.52	TRUE	TRUE	TRUE	target	{'sensor': 0.52, 'sensorless': 0.48}
Semantic Relations	antonyms_gradable	abnormal is to normal as poor is to	rich	rich	0.63	1	1	{'rich': 0.63, 'wealthy': 0.11, '______': 0.03, '_____': 0.02, '____': 0.01}	0	0.632812	0	1	context	context|target	0.52	TRUE	TRUE	TRUE	target	{'rich': 0.52, 'poor': 0.48}
Verbal & Grammatical Forms	verb_Ving_3pSg	appearing is to appears as suggesting is to	suggests	suggest	0.63	0.5	1	{'suggest': 0.63, 'suggests': 0.06, 'suggested': 0.03, 'suggesting': 0.03, 'be': 0.02}	1	0.0551758	0.57373	0.99999	context	context|target	0.52	TRUE	TRUE	TRUE	target	{'suggests': 0.52, 'suggesting': 0.47}
Verbal & Grammatical Forms	verb_inf_3pSg	seems is to seem as sends is to	send	send	0.63	1	1	{'send': 0.63, 'sent': 0.09, 'seem': 0.07, 'be': 0.02, 'sending': 0.01}	0	0.632812	0	1	context	context|target	0.52	TRUE	TRUE	TRUE	target	{'send': 0.52, 'sends': 0.5}
Morphological Modifiers	verb+er_irreg	announcer is to announce as organiser is to	organise	organise	0.62	1	1	{'organise': 0.62, 'organize': 0.07, 'arrange': 0.01, 'manage': 0.01, 'organ': 0.01}	0	0.621094	0	1	context	context|target	0.52	TRUE	TRUE	TRUE	target	{'organise': 0.52, 'organiser': 0.47}
Verbal & Grammatical Forms	verb_Ving_3pSg	considering is to considers as sitting is to	sits	sits	0.62	1	1	{'sits': 0.62, 'sit': 0.16, 'sitting': 0.03, 'seats': 0.03, 'sat': 0.02}	0	0.621094	0	1	context	context|target	0.52	TRUE	TRUE	TRUE	target	{'sits': 0.52, 'sitting': 0.51}
Verbal & Grammatical Forms	verb_inf_Ving	containing is to contain as improving is to	improve	improve	0.62	1	1	{'improve': 0.62, 'contain': 0.03, 'improvement': 0.02, 'be': 0.02, 'improv': 0.01}	0	0.617188	0	1	context	context|target	0.52	TRUE	TRUE	TRUE	target	{'improve': 0.52, 'improving': 0.51}
Verbal & Grammatical Forms	verb_Ving_Ved	taught is to teaching as understood is to	understanding	understanding	0.62	1	1	{'understanding': 0.62, 'understood': 0.18, 'understand': 0.03, '______': 0.01, 'being': 0.01}	0	0.625	0	1	context	context|target	0.52	TRUE	TRUE	TRUE	target	{'understanding': 0.52, 'understood': 0.5}
Factual Knowledge	capital_world	Damascus is to Syria as Kampala is to	uganda	Uganda	0.61	1	1	{'Uganda': 0.61, '______': 0.06, '__': 0.05, 'what': 0.03, '_____': 0.02}	0	0.605469	0	1	context	context|target	0.52	TRUE	TRUE	TRUE	target	{'uganda': 0.52, 'kampala': 0.48}
Verbal & Grammatical Forms	verb_inf_Ving	adding is to add as protecting is to	protect	protect	0.61	1	1	{'protect': 0.61, 'shield': 0.04, 'guard': 0.03, '______': 0.02, '__': 0.01}	0	0.613281	0	1	context	context|target	0.52	TRUE	TRUE	TRUE	target	{'protect': 0.52, 'protecting': 0.49}
Verbal & Grammatical Forms	verb_3pSg_Ved	allows is to allowed as considers is to	considered	considered	0.61	1	1	{'considered': 0.61, 'consider': 0.04, 'considering': 0.02, 'considers': 0.02, 'allowed': 0.02}	0	0.613281	0	1	context	context|target	0.52	TRUE	TRUE	TRUE	target	{'considered': 0.52, 'considers': 0.5}
Verbal & Grammatical Forms	verb_Ving_Ved	existing is to existed as expecting is to	expected	expected	0.61	1	1	{'expected': 0.61, 'expect': 0.15, 'to': 0.03, 'expecting': 0.01, 'waited': 0.01}	0	0.609375	0	1	context	context|target	0.52	TRUE	TRUE	TRUE	target	{'expected': 0.52, 'expecting': 0.48}
Verbal & Grammatical Forms	verb_Ving_Ved	becoming is to became as deciding is to	decided	decided	0.61	1	1	{'decided': 0.61, 'decide': 0.04, '__': 0.03, '______': 0.03, '': 0.02}	0	0.605469	0	1	context	context|target	0.52	TRUE	TRUE	TRUE	target	{'decided': 0.52, 'deciding': 0.5}
Verbal & Grammatical Forms	verb_inf_3pSg	achieves is to achieve as avoids is to	avoid	avoid	0.6	1	1	{'avoid': 0.6, '': 0.02, 'avoids': 0.02, 'evade': 0.02}	0	0.601562	0	1	context	context|target	0.52	TRUE	TRUE	TRUE	target	{'avoid': 0.52, 'avoids': 0.5}
Verbal & Grammatical Forms	verb_inf_Ving	enjoying is to enjoy as providing is to	provide	provide	0.6	1	1	{'provide': 0.6, 'give': 0.1, 'enjoy': 0.04, 'be': 0.02, 'produce': 0.02}	0	0.601562	0	1	context	context|target	0.52	TRUE	TRUE	TRUE	target	{'provide': 0.52, 'providing': 0.47}
Factual Knowledge	country_capital	Romania is to Bucharest as Denmark is to	copenhagen	Copenhagen	0.59	1	1	{'Copenhagen': 0.59, 'what': 0.03, 'A': 0.03, ':': 0.03, '?': 0.02}	0	0.585938	0	1	context	context|target	0.52	TRUE	TRUE	TRUE	target	{'copenhagen': 0.52, 'denmark': 0.51}
Factual Knowledge	capital_world	Romania is to Bucharest as Denmark is to	copenhagen	Copenhagen	0.59	1	1	{'Copenhagen': 0.59, 'what': 0.03, 'A': 0.03, ':': 0.03, '?': 0.02}	0	0.585938	0	1	context	context|target	0.52	TRUE	TRUE	TRUE	target	{'copenhagen': 0.52, 'denmark': 0.51}
Morphological Modifiers	verb+er_irreg	offender is to offend as teacher is to	teach	teach	0.59	1	1	{'teach': 0.59, 'educate': 0.05, 'instruct': 0.03, '______': 0.02, '__': 0.02}	0	0.59375	0	1	context	context|target	0.52	TRUE	TRUE	TRUE	target	{'teach': 0.52, 'teacher': 0.48}
Verbal & Grammatical Forms	verb_inf_3pSg	achieves is to achieve as ensures is to	ensure	ensure	0.59	1	1	{'ensure': 0.59, 'assure': 0.05, 'insure': 0.03, 'be': 0.02, 'make': 0.02}	0	0.589844	0	1	context	context|target	0.52	TRUE	TRUE	TRUE	target	{'ensure': 0.52, 'ensures': 0.47}
Verbal & Grammatical Forms	verb_inf_Ved	accept is to accepted as apply is to	applied	applied	0.59	1	1	{'applied': 0.59, 'application': 0.06, 'applicable': 0.03, '': 0.02, 'accepted': 0.02}	0	0.59375	0	1	context	context|target	0.52	TRUE	TRUE	TRUE	target	{'applied': 0.52, 'apply': 0.49}
Verbal & Grammatical Forms	verb_Ving_Ved	expected is to expecting as involved is to	involving	involving	0.59	1	1	{'involving': 0.59, 'involve': 0.09, 'involvement': 0.08, 'involved': 0.06, 'involves': 0.04}	0	0.589844	0	1	context	context|target	0.52	TRUE	TRUE	TRUE	target	{'involving': 0.52, 'involved': 0.51}
Morphological Modifiers	re+verb_reg	reinstall is to install as republish is to	publish	publish	0.58	1	1	{'publish': 0.58, 'rep': 0.12, '': 0.02, 'update': 0.01, 'deploy': 0.01}	0	0.582031	0	1	context	context|target	0.52	TRUE	TRUE	TRUE	target	{'publish': 0.52, 'republish': 0.51}
Verbal & Grammatical Forms	verb_inf_3pSg	consider is to considers as represent is to	represents	represents	0.58	1	1	{'represents': 0.58, 'represent': 0.05, 'represented': 0.03, 'presents': 0.02, 'rep': 0.02}	0	0.578125	0	1	context	context|target	0.52	TRUE	TRUE	TRUE	target	{'represents': 0.52, 'represent': 0.47}
Verbal & Grammatical Forms	verb_inf_3pSg	happens is to happen as includes is to	include	include	0.58	1	1	{'include': 0.58, 'included': 0.09, 'be': 0.08, 'includes': 0.01, 'contain': 0.01}	0	0.582031	0	1	context	context|target	0.52	TRUE	TRUE	TRUE	target	{'include': 0.52, 'includes': 0.51}
Semantic Relations	antonyms_gradable	sane is to crazy as tight is to	loose	loose	0.57	1	1	{'loose': 0.57, 'lose': 0.03, '______': 0.02, '...': 0.02, 'fat': 0.01}	0	0.574219	0	1	context	context|target	0.52	TRUE	TRUE	TRUE	target	{'loose': 0.52, 'tight': 0.49}
Verbal & Grammatical Forms	verb_inf_3pSg	remains is to remain as tells is to	tell	tell	0.57	1	1	{'tell': 0.57, 'told': 0.09, 'tells': 0.05, 't': 0.02, 'tale': 0.01}	0	0.574219	0	1	context	context|target	0.52	TRUE	TRUE	TRUE	target	{'tell': 0.52, 'tells': 0.47}
Verbal & Grammatical Forms	verb_3pSg_Ved	adds is to added as replaces is to	replaced	replaced	0.57	1	1	{'replaced': 0.57, 'removed': 0.13, 'replaces': 0.06, 'deleted': 0.05, 'replace': 0.03}	0	0.570312	0	1	context	context|target	0.52	TRUE	TRUE	TRUE	target	{'replaced': 0.52, 'replaces': 0.49}
Semantic Relations	male_female	goddess is to god as niece is to	nephew	uncle	0.56	0	1	{'uncle': 0.56, 'nephew': 0.23, 'what': 0.01, '______': 0.01, 'brother': 0.01}	1	0.234375	0.328125	0.99999	context	context|target	0.52	TRUE	TRUE	TRUE	target	{'nephew': 0.52, 'niece': 0.49}
Verbal & Grammatical Forms	verb_inf_3pSg	agrees is to agree as suggests is to	suggest	suggest	0.56	1	1	{'suggest': 0.56, 'suggests': 0.04, 'propose': 0.02, 'agree': 0.02, 'be': 0.02}	0	0.5625	0	1	context	context|target	0.52	TRUE	TRUE	TRUE	target	{'suggest': 0.52, 'suggests': 0.49}
Verbal & Grammatical Forms	verb_inf_3pSg	achieves is to achieve as creates is to	create	create	0.56	1	1	{'create': 0.56, 'creates': 0.07, '': 0.03, 'be': 0.02, 'created': 0.01}	0	0.558594	0	1	context	context|target	0.52	TRUE	TRUE	TRUE	target	{'create': 0.52, 'creates': 0.49}
Verbal & Grammatical Forms	verb_inf_Ving	encouraging is to encourage as enjoying is to	enjoy	enjoy	0.56	1	1	{'enjoy': 0.56, 'be': 0.05, 'enjoyment': 0.04, 'rejoice': 0.04, '': 0.02}	0	0.5625	0	1	context	context|target	0.52	TRUE	TRUE	TRUE	target	{'enjoy': 0.52, 'enjoying': 0.51}
Verbal & Grammatical Forms	verb_Ving_Ved	decided is to deciding as understood is to	understanding	understanding	0.56	1	1	{'understanding': 0.56, 'understood': 0.23, 'understand': 0.05, '______': 0.02, '__': 0.01}	0	0.558594	0	1	context	context|target	0.52	TRUE	TRUE	TRUE	target	{'understanding': 0.52, 'understood': 0.46}
Morphological Modifiers	re+verb_reg	reconnect is to connect as reupload is to	upload	upload	0.55	1	1	{'upload': 0.55, 're': 0.03, 'download': 0.03, 'delete': 0.02, 'copy': 0.02}	0	0.546875	0	1	context	context|target	0.52	TRUE	TRUE	TRUE	target	{'upload': 0.52, 'reupload': 0.47}
Morphological Modifiers	adj+ly_reg	decidedly is to decided as virtually is to	virtual	virtually	0.55	0	1	{'virtually': 0.55, 'virtual': 0.05, '______': 0.03, '': 0.02, '__': 0.02}	1	0.048584	0.506104	0.99999	context	context|target	0.52	TRUE	TRUE	TRUE	target	{'virtual': 0.52, 'virtually': 0.49}
Morphological Modifiers	verb+er_irreg	receiver is to receive as teacher is to	teach	teach	0.55	1	1	{'teach': 0.55, 'instruct': 0.07, 'learn': 0.06, 'give': 0.04, 'student': 0.02}	0	0.554688	0	1	context	context|target	0.52	TRUE	TRUE	TRUE	target	{'teach': 0.52, 'teacher': 0.5}
Verbal & Grammatical Forms	verb_inf_3pSg	consider is to considers as continue is to	continues	continues	0.55	1	1	{'continues': 0.55, 'continued': 0.03, 'cont': 0.03, 'continu': 0.03, 'considers': 0.02}	0	0.546875	0	1	context	context|target	0.52	TRUE	TRUE	TRUE	target	{'continues': 0.52, 'continue': 0.5}
Verbal & Grammatical Forms	verb_inf_3pSg	continues is to continue as ensures is to	ensure	ensure	0.55	1	1	{'ensure': 0.55, 'assure': 0.1, 'insure': 0.05, 'ens': 0.03, 'sure': 0.03}	0	0.550781	0	1	context	context|target	0.52	TRUE	TRUE	TRUE	target	{'ensure': 0.52, 'ensures': 0.48}
Verbal & Grammatical Forms	verb_3pSg_Ved	creates is to created as loses is to	lost	lost	0.55	1	1	{'lost': 0.55, '______': 0.04, 'loses': 0.03, '_____': 0.02, '': 0.02}	0	0.550781	0	1	context	context|target	0.52	TRUE	TRUE	TRUE	target	{'lost': 0.52, 'loses': 0.49}
Morphological Modifiers	verb+er_irreg	announcer is to announce as loser is to	lose	lose	0.54	1	1	{'lose': 0.54, 'win': 0.05, 'be': 0.03, 'loser': 0.01, 'fail': 0.01}	0	0.539062	0	1	context	context|target	0.52	TRUE	TRUE	TRUE	target	{'lose': 0.52, 'loser': 0.51}
Verbal & Grammatical Forms	verb_inf_Ving	achieving is to achieve as adding is to	add	add	0.54	1	1	{'add': 0.54, 'subtract': 0.08, 'multiply': 0.06, 'sum': 0.03, 'be': 0.02}	0	0.542969	0	1	context	context|target	0.52	TRUE	TRUE	TRUE	target	{'add': 0.52, 'adding': 0.51}
Verbal & Grammatical Forms	verb_Ving_3pSg	appears is to appearing as contains is to	containing	contained	0.54	0	1	{'contained': 0.54, 'containing': 0.15, 'contains': 0.06, 'containment': 0.05, 'container': 0.03}	1	0.15332	0.381836	0.99999	context	context|target	0.52	TRUE	TRUE	TRUE	target	{'containing': 0.52, 'contains': 0.48}
Verbal & Grammatical Forms	verb_inf_3pSg	creates is to create as prevents is to	prevent	prevent	0.54	1	1	{'prevent': 0.54, 'prevents': 0.07, 'stop': 0.02, 'to': 0.01, 'avoid': 0.01}	0	0.535156	0	1	context	context|target	0.52	TRUE	TRUE	TRUE	target	{'prevent': 0.52, 'prevents': 0.51}
Verbal & Grammatical Forms	verb_Ving_Ved	involved is to involving as understood is to	understanding	understanding	0.54	1	1	{'understanding': 0.54, 'understood': 0.06, '______': 0.04, '': 0.03, '__': 0.03}	0	0.539062	0	1	context	context|target	0.52	TRUE	TRUE	TRUE	target	{'understanding': 0.52, 'understood': 0.49}
Morphological Modifiers	adj_comparative	sexy is to sexier as strict is to	stricter	stricter	0.53	1	1	{'stricter': 0.53, 'strict': 0.07, '______': 0.06, 'str': 0.03, '__': 0.03}	0	0.527344	0	1	context	context|target	0.52	TRUE	TRUE	TRUE	target	{'stricter': 0.52, 'strict': 0.5}
Morphological Modifiers	re+verb_reg	reassign is to assign as republish is to	publish	publish	0.53	1	1	{'publish': 0.53, 'rep': 0.05, '?': 0.02, '': 0.02, '__': 0.02}	0	0.527344	0	1	context	context|target	0.52	TRUE	TRUE	TRUE	target	{'publish': 0.52, 'republish': 0.51}
Verbal & Grammatical Forms	verb_Ving_3pSg	involving is to involves as requiring is to	requires	requires	0.53	1	1	{'requires': 0.53, 'require': 0.09, '': 0.02, '?': 0.02}	0	0.53125	0	1	context	context|target	0.52	TRUE	TRUE	TRUE	target	{'requires': 0.52, 'requiring': 0.49}
Verbal & Grammatical Forms	verb_inf_Ving	becoming is to become as enjoying is to	enjoy	enjoy	0.53	1	1	{'enjoy': 0.53, 'enjoyment': 0.09, 'become': 0.09, 'be': 0.08, 'being': 0.01}	0	0.53125	0	1	context	context|target	0.52	TRUE	TRUE	TRUE	target	{'enjoy': 0.52, 'enjoying': 0.51}
Verbal & Grammatical Forms	verb_inf_3pSg	achieves is to achieve as protects is to	protect	protect	0.53	1	1	{'protect': 0.53, 'protects': 0.08, 'be': 0.02, 'preserve': 0.01, 'provide': 0.01}	0	0.53125	0	1	context	context|target	0.52	TRUE	TRUE	TRUE	target	{'protect': 0.52, 'protects': 0.49}
Verbal & Grammatical Forms	verb_3pSg_Ved	creates is to created as sends is to	sent	sent	0.53	1	1	{'sent': 0.53, 'sends': 0.06, 'send': 0.04, '______': 0.02, 'sending': 0.02}	0	0.527344	0	1	context	context|target	0.52	TRUE	TRUE	TRUE	target	{'sent': 0.52, 'sends': 0.48}
Morphological Modifiers	adj_superlative	strongest is to strong as weirdest is to	weird	weird	0.52	1	1	{'weird': 0.52, 'weir': 0.11, 'strange': 0.03, '_____': 0.02, '______': 0.02}	0	0.519531	0	1	context	context|target	0.52	TRUE	TRUE	TRUE	target	{'weird': 0.52, 'weirdest': 0.5}
Morphological Modifiers	superlative	strongest is to strong as weirdest is to	weird	weird	0.52	1	1	{'weird': 0.52, 'weir': 0.11, 'strange': 0.03, '_____': 0.02, '______': 0.02}	0	0.519531	0	1	context	context|target	0.52	TRUE	TRUE	TRUE	target	{'weird': 0.52, 'weirdest': 0.5}
Verbal & Grammatical Forms	verb_inf_3pSg	avoids is to avoid as believes is to	believe	believe	0.52	1	1	{'believe': 0.52, 'believes': 0.02, 'be': 0.02, 'think': 0.02, 'avoid': 0.02}	0	0.519531	0	1	context	context|target	0.52	TRUE	TRUE	TRUE	target	{'believe': 0.52, 'believes': 0.48}
Verbal & Grammatical Forms	verb_inf_3pSg	achieves is to achieve as understands is to	understand	understand	0.52	1	1	{'understand': 0.52, 'be': 0.04, 'know': 0.03, 'understanding': 0.02, 'understands': 0.01}	0	0.523438	0	1	context	context|target	0.52	TRUE	TRUE	TRUE	target	{'understand': 0.52, 'understands': 0.47}
Verbal & Grammatical Forms	verb_inf_3pSg	provide is to provides as seem is to	seems	seems	0.52	1	1	{'seems': 0.52, '?': 0.02, '': 0.05, 'seem': 0.02}	0	0.523438	0	1	context	context|target	0.52	TRUE	TRUE	TRUE	target	{'seems': 0.52, 'seem': 0.49}
Verbal & Grammatical Forms	verb_inf_Ved	believe is to believed as understand is to	understood	understood	0.52	1	1	{'understood': 0.52, 'understanding': 0.2, 'understand': 0.04, '______': 0.03, '__': 0.02}	0	0.515625	0	1	context	context|target	0.52	TRUE	TRUE	TRUE	target	{'understood': 0.52, 'understand': 0.49}
Verbal & Grammatical Forms	verb_inf_Ving	enjoying is to enjoy as following is to	follow	follow	0.52	1	1	{'follow': 0.52, 'lead': 0.1, 'be': 0.07, 'obey': 0.03, 'go': 0.02}	0	0.515625	0	1	context	context|target	0.52	TRUE	TRUE	TRUE	target	{'follow': 0.52, 'following': 0.48}
Morphological Modifiers	adj_comparative	stricter is to strict as stronger is to	strong	strong	0.51	1	1	{'strong': 0.51, 'weak': 0.11, '______': 0.03, '_____': 0.02, '____': 0.02}	0	0.507812	0	1	context	context|target	0.52	TRUE	TRUE	TRUE	target	{'strong': 0.52, 'stronger': 0.49}
Verbal & Grammatical Forms	verb_Ving_3pSg	considering is to considers as developing is to	develops	develops	0.51	1	1	{'develops': 0.51, 'developed': 0.17, 'develop': 0.09, 'developments': 0.02, 'development': 0.02}	0	0.511719	0	1	context	context|target	0.52	TRUE	TRUE	TRUE	target	{'develops': 0.52, 'developing': 0.5}
Verbal & Grammatical Forms	verb_inf_3pSg	accept is to accepts as send is to	sends	sends	0.51	1	1	{'sends': 0.51, 'sent': 0.16, 'send': 0.05, 'sending': 0.05, '__': 0.01}	0	0.507812	0	1	context	context|target	0.52	TRUE	TRUE	TRUE	target	{'sends': 0.52, 'send': 0.49}
Factual Knowledge	country_capital	Denmark is to Copenhagen as Jamaica is to	kingston	Kingston	0.5	1	1	{'Kingston': 0.5, 'Mont': 0.04, ':': 0.03, '__': 0.03, '______': 0.03}	0	0.503906	0	1	context	context|target	0.52	TRUE	TRUE	TRUE	target	{'kingston': 0.52, 'jamaica': 0.49}
Factual Knowledge	capital_world	Denmark is to Copenhagen as Jamaica is to	kingston	Kingston	0.5	1	1	{'Kingston': 0.5, 'Mont': 0.04, ':': 0.03, '__': 0.03, '______': 0.03}	0	0.503906	0	1	context	context|target	0.52	TRUE	TRUE	TRUE	target	{'kingston': 0.52, 'jamaica': 0.49}
Morphological Modifiers	adj_comparative	stronger is to strong as weirder is to	weird	weird	0.5	1	1	{'weird': 0.5, '_____': 0.03, '____': 0.03, 'strange': 0.03, '______': 0.02}	0	0.498047	0	1	context	context|target	0.52	TRUE	TRUE	TRUE	target	{'weird': 0.52, 'weirder': 0.48}
Morphological Modifiers	re+verb_reg	remarry is to marry as reorganize is to	organize	organize	0.5	1	1	{'organize': 0.5, 're': 0.09, 'marry': 0.06, '': 0.04, 'arrange': 0.03}	0	0.498047	0	1	context	context|target	0.52	TRUE	TRUE	TRUE	target	{'organize': 0.52, 'reorganize': 0.48}
Verbal & Grammatical Forms	verb_inf_3pSg	accepts is to accept as includes is to	include	include	0.5	1	1	{'include': 0.5, 'accept': 0.04, 'contain': 0.03, 'be': 0.03, 'take': 0.02}	0	0.5	0	1	context	context|target	0.52	TRUE	TRUE	TRUE	target	{'include': 0.52, 'includes': 0.49}
Verbal & Grammatical Forms	verb_inf_Ved	describe is to described as identify is to	identified	identify	0.5	0	1	{'identify': 0.5, 'identified': 0.21, 'identity': 0.04, '______': 0.02, 'identification': 0.02}	1	0.210938	0.292969	0.99999	context	context|target	0.52	TRUE	TRUE	TRUE	target	{'identified': 0.52, 'identify': 0.49}
Factual Knowledge	country_capital	Greece is to Athens as Norway is to	oslo	Oslo	0.49	1	1	{'Oslo': 0.49, '______': 0.08, '__': 0.03, '_____': 0.02, '____': 0.02}	0	0.494141	0	1	context	context|target	0.52	TRUE	TRUE	TRUE	target	{'oslo': 0.52, 'norway': 0.48}
Factual Knowledge	capital_world	Greece is to Athens as Norway is to	oslo	Oslo	0.49	1	1	{'Oslo': 0.49, '______': 0.08, '__': 0.03, '_____': 0.02, '____': 0.02}	0	0.494141	0	1	context	context|target	0.52	TRUE	TRUE	TRUE	target	{'oslo': 0.52, 'norway': 0.48}
Verbal & Grammatical Forms	verb_Ving_3pSg	requiring is to requires as suggesting is to	suggests	suggests	0.49	1	1	{'suggests': 0.49, 'suggest': 0.26, '?': 0.01, '__': 0.01, 'requires': 0.01}	0	0.494141	0	1	context	context|target	0.52	TRUE	TRUE	TRUE	target	{'suggests': 0.52, 'suggesting': 0.47}
Verbal & Grammatical Forms	verb_Ving_3pSg	appearing is to appears as relating is to	relates	relate	0.49	0.5	1	{'relate': 0.49, 'relates': 0.1, 'related': 0.1, 'relations': 0.04, 'relating': 0.02}	2	0.103516	0.390625	0.99998	context	context|target	0.52	TRUE	TRUE	TRUE	target	{'relates': 0.52, 'relating': 0.5}
Verbal & Grammatical Forms	past_tense	describing is to described as spending is to	spent	spent	0.49	1	1	{'spent': 0.49, 'spend': 0.25, 'spending': 0.02, '': 0.02, '______': 0.01}	0	0.488281	0	1	context	context|target	0.52	TRUE	TRUE	TRUE	target	{'spent': 0.52, 'spending': 0.48}
Verbal & Grammatical Forms	verb_inf_Ved	decided is to decide as reduced is to	reduce	reduce	0.49	1	1	{'reduce': 0.49, 'reduced': 0.14, 're': 0.05, 'reduction': 0.04, 'be': 0.03}	0	0.492188	0	1	context	context|target	0.52	TRUE	TRUE	TRUE	target	{'reduce': 0.52, 'reduced': 0.5}
Verbal & Grammatical Forms	verb_inf_Ved	become is to became as spend is to	spent	spent	0.49	1	1	{'spent': 0.49, '______': 0.08, '__': 0.04, 'sp': 0.03, '': 0.02}	0	0.494141	0	1	context	context|target	0.52	TRUE	TRUE	TRUE	target	{'spent': 0.52, 'spend': 0.48}
Verbal & Grammatical Forms	verb_Ving_Ved	describing is to described as spending is to	spent	spent	0.49	1	1	{'spent': 0.49, 'spend': 0.25, 'spending': 0.02, '': 0.02, '______': 0.01}	0	0.488281	0	1	context	context|target	0.52	TRUE	TRUE	TRUE	target	{'spent': 0.52, 'spending': 0.48}
Morphological Modifiers	adj_comparative	lucky is to luckier as strong is to	stronger	stronger	0.48	1	1	{'stronger': 0.48, 'weaker': 0.06, '______': 0.05, '__': 0.04, '"': 0.02}	0	0.478516	0	1	context	context|target	0.52	TRUE	TRUE	TRUE	target	{'stronger': 0.52, 'strong': 0.5}
Verbal & Grammatical Forms	noun_plural_reg	gods is to god as villages is to	village	village	0.48	1	1	{'village': 0.48, 'city': 0.19, 'town': 0.06, 'country': 0.03, 'a': 0.02}	0	0.476562	0	1	context	context|target	0.52	TRUE	TRUE	TRUE	target	{'village': 0.52, 'villages': 0.51}
Verbal & Grammatical Forms	verb_inf_Ving	learn is to learning as require is to	requiring	requiring	0.48	1	1	{'requiring': 0.48, 'require': 0.05, 'dependency': 0.04, 'required': 0.03, 'loading': 0.03}	0	0.478516	0	1	context	context|target	0.52	TRUE	TRUE	TRUE	target	{'requiring': 0.52, 'require': 0.49}
Verbal & Grammatical Forms	verb_Ving_Ved	appearing is to appeared as improving is to	improved	improved	0.48	1	1	{'improved': 0.48, 'appeared': 0.04, 'better': 0.02, 'appearing': 0.02, 'appear': 0.01}	0	0.478516	0	1	context	context|target	0.52	TRUE	TRUE	TRUE	target	{'improved': 0.52, 'improving': 0.48}
Morphological Modifiers	re+verb_reg	rearrange is to arrange as reconnect is to	connect	connect	0.47	1	1	{'connect': 0.47, 'reconnect': 0.11, '': 0.03, '______': 0.03}	0	0.46875	0	1	context	context|target	0.52	TRUE	TRUE	TRUE	target	{'connect': 0.52, 'reconnect': 0.51}
Verbal & Grammatical Forms	verb_inf_3pSg	includes is to include as prevents is to	prevent	prevent	0.47	1	1	{'prevent': 0.47, 'exclude': 0.1, 'stop': 0.06, 'not': 0.04, 'keep': 0.03}	0	0.46875	0	1	context	context|target	0.52	TRUE	TRUE	TRUE	target	{'prevent': 0.52, 'prevents': 0.49}
Verbal & Grammatical Forms	verb_inf_3pSg	enables is to enable as requires is to	require	require	0.47	1	1	{'require': 0.47, 'requires': 0.21, 'request': 0.02, 'be': 0.01, '': 0.01}	0	0.470703	0	1	context	context|target	0.52	TRUE	TRUE	TRUE	target	{'require': 0.52, 'requires': 0.5}
Verbal & Grammatical Forms	verb_Ving_Ved	created is to creating as decided is to	deciding	deciding	0.47	1	1	{'deciding': 0.47, 'decide': 0.2, 'decided': 0.14, 'decision': 0.03, 'choosing': 0.01}	0	0.46875	0	1	context	context|target	0.52	TRUE	TRUE	TRUE	target	{'deciding': 0.52, 'decided': 0.5}
Factual Knowledge	country_capital	Denmark is to Copenhagen as England is to	london	London	0.46	1	1	{'London': 0.46, '______': 0.07, '__': 0.04, ':': 0.03, '': 0.02}	0	0.455078	0	1	context	context|target	0.52	TRUE	TRUE	TRUE	target	{'london': 0.52, 'england': 0.49}
Factual Knowledge	capital_world	Denmark is to Copenhagen as England is to	london	London	0.46	1	1	{'London': 0.46, '______': 0.07, '__': 0.04, ':': 0.03, '': 0.02}	0	0.455078	0	1	context	context|target	0.52	TRUE	TRUE	TRUE	target	{'london': 0.52, 'england': 0.49}
Morphological Modifiers	verb+able_reg	containable is to contain as reliable is to	rely	rely	0.46	1	1	{'rely': 0.46, 'be': 0.1, 'trust': 0.06, 'depend': 0.02, 'believe': 0.01}	0	0.464844	0	1	context	context|target	0.52	TRUE	TRUE	TRUE	target	{'rely': 0.52, 'reliable': 0.51}
Morphological Modifiers	verb+ment_irreg	entertainment is to entertain as harassment is to	harass	harass	0.46	1	1	{'harass': 0.46, 'harm': 0.04, 'h': 0.04, '': 0.03, 'annoy': 0.03}	0	0.462891	0	1	context	context|target	0.52	TRUE	TRUE	TRUE	target	{'harass': 0.52, 'harassment': 0.49}
Verbal & Grammatical Forms	verb_Ving_3pSg	appearing is to appears as considering is to	considers	consider	0.46	0.5	1	{'consider': 0.46, 'considered': 0.1, 'be': 0.04, 'considers': 0.04, 'think': 0.02}	3	0.0375977	0.421387	0.99997	context	context|target	0.52	TRUE	TRUE	TRUE	target	{'considers': 0.52, 'considering': 0.49}
Verbal & Grammatical Forms	verb_Ving_3pSg	exists is to existing as teaches is to	teaching	teaching	0.46	1	1	{'teaching': 0.46, '______': 0.05, 'learning': 0.04, 'teach': 0.04, '__': 0.03}	0	0.458984	0	1	context	context|target	0.52	TRUE	TRUE	TRUE	target	{'teaching': 0.52, 'teaches': 0.48}
Verbal & Grammatical Forms	verb_inf_3pSg	continues is to continue as promotes is to	promote	promote	0.46	1	1	{'promote': 0.46, 'promotes': 0.21, 'promotion': 0.02, 'promotions': 0.01, 'continue': 0.01}	0	0.462891	0	1	context	context|target	0.52	TRUE	TRUE	TRUE	target	{'promote': 0.52, 'promotes': 0.47}
Factual Knowledge	country_capital	Ankara is to Turkey as Bangkok is to	thailand	Thailand	0.45	1	1	{'Thailand': 0.45, '______': 0.09, 'what': 0.05, '_____': 0.04, ':': 0.04}	0	0.447266	0	1	context	context|target	0.52	TRUE	TRUE	TRUE	target	{'thailand': 0.52, 'bangkok': 0.5}
Factual Knowledge	country_capital	Switzerland is to Bern as Syria is to	damascus	Damascus	0.45	1	1	{'Damascus': 0.45, '______': 0.07, '__': 0.04, '____': 0.03, '_': 0.03}	0	0.449219	0	1	context	context|target	0.52	TRUE	TRUE	TRUE	target	{'damascus': 0.52, 'syria': 0.5}
Factual Knowledge	country_capital	Russia is to Moscow as Canada is to	ottawa	Toronto	0.45	0	1	{'Toronto': 0.45, 'Ottawa': 0.15, 'Canada': 0.05, '______': 0.03, '__': 0.03}	1	0.145508	0.301758	0.99999	context	context|target	0.52	TRUE	TRUE	TRUE	target	{'ottawa': 0.52, 'canada': 0.51}
Factual Knowledge	capital_world	Ankara is to Turkey as Bangkok is to	thailand	Thailand	0.45	1	1	{'Thailand': 0.45, '______': 0.09, 'what': 0.05, '_____': 0.04, ':': 0.04}	0	0.447266	0	1	context	context|target	0.52	TRUE	TRUE	TRUE	target	{'thailand': 0.52, 'bangkok': 0.5}
Factual Knowledge	capital_world	Russia is to Moscow as Canada is to	ottawa	Toronto	0.45	0	1	{'Toronto': 0.45, 'Ottawa': 0.15, 'Canada': 0.05, '______': 0.03, '__': 0.03}	1	0.145508	0.301758	0.99999	context	context|target	0.52	TRUE	TRUE	TRUE	target	{'ottawa': 0.52, 'canada': 0.51}
Factual Knowledge	capital_world	Spain is to Madrid as England is to	london	London	0.45	1	1	{'London': 0.45, '______': 0.09, '__': 0.04, '_____': 0.02, ':': 0.02}	0	0.447266	0	1	context	context|target	0.52	TRUE	TRUE	TRUE	target	{'london': 0.52, 'england': 0.49}
Factual Knowledge	capital_world	Switzerland is to Bern as Syria is to	damascus	Damascus	0.45	1	1	{'Damascus': 0.45, '______': 0.07, '__': 0.04, '____': 0.03, '_': 0.03}	0	0.449219	0	1	context	context|target	0.52	TRUE	TRUE	TRUE	target	{'damascus': 0.52, 'syria': 0.5}
Verbal & Grammatical Forms	verb_inf_Ving	become is to becoming as continue is to	continuing	continuing	0.45	1	1	{'continuing': 0.45, 'continuation': 0.06, 'continu': 0.05, '______': 0.03, 'becoming': 0.03}	0	0.445312	0	1	context	context|target	0.52	TRUE	TRUE	TRUE	target	{'continuing': 0.52, 'continue': 0.5}
Verbal & Grammatical Forms	verb_inf_3pSg	improves is to improve as sends is to	send	send	0.45	1	1	{'send': 0.45, 'sends': 0.08, 'receive': 0.05, 'sent': 0.04, 'sending': 0.02}	0	0.449219	0	1	context	context|target	0.52	TRUE	TRUE	TRUE	target	{'send': 0.52, 'sends': 0.5}
Verbal & Grammatical Forms	verb_inf_Ving	following is to follow as improving is to	improve	improve	0.45	1	1	{'improve': 0.45, 'be': 0.04, 'improvement': 0.03, 'follow': 0.02, 'continue': 0.01}	0	0.447266	0	1	context	context|target	0.52	TRUE	TRUE	TRUE	target	{'improve': 0.52, 'improving': 0.51}
Verbal & Grammatical Forms	verb_inf_Ving	learning is to learn as maintaining is to	maintain	maintain	0.45	1	1	{'maintain': 0.45, 'keep': 0.04, 'maintenance': 0.03, 'repair': 0.02, 'sustain': 0.02}	0	0.453125	0	1	context	context|target	0.52	TRUE	TRUE	TRUE	target	{'maintain': 0.52, 'maintaining': 0.49}
Verbal & Grammatical Forms	verb_inf_Ving	containing is to contain as spending is to	spend	spend	0.45	1	1	{'spend': 0.45, 'contain': 0.17, 'be': 0.06, 'expense': 0.03, 'save': 0.02}	0	0.447266	0	1	context	context|target	0.52	TRUE	TRUE	TRUE	target	{'spend': 0.52, 'spending': 0.5}
Morphological Modifiers	verb+able_reg	protect is to protectable as rely is to	reliable	reliable	0.44	1	1	{'reliable': 0.44, 'reliant': 0.07, 'rel': 0.06, 'rely': 0.05, 'reli': 0.04}	0	0.4375	0	1	context	context|target	0.52	TRUE	TRUE	TRUE	target	{'reliable': 0.52, 'rely': 0.51}
Verbal & Grammatical Forms	verb_Ving_3pSg	receiving is to receives as sitting is to	sits	sits	0.44	1	1	{'sits': 0.44, 'sit': 0.22, 'seats': 0.03, '_____': 0.02, '______': 0.02}	0	0.441406	0	1	context	context|target	0.52	TRUE	TRUE	TRUE	target	{'sits': 0.52, 'sitting': 0.5}
Verbal & Grammatical Forms	verb_inf_3pSg	agrees is to agree as requires is to	require	require	0.44	1	1	{'require': 0.44, 'requires': 0.08, 'be': 0.03, 'agree': 0.03, 'request': 0.02}	0	0.439453	0	1	context	context|target	0.52	TRUE	TRUE	TRUE	target	{'require': 0.52, 'requires': 0.49}
Verbal & Grammatical Forms	verb_inf_3pSg	provide is to provides as suggest is to	suggests	suggests	0.44	1	1	{'suggests': 0.44, '': 0.06, '?': 0.03, 'suggest': 0.05}	0	0.435547	0	1	context	context|target	0.52	TRUE	TRUE	TRUE	target	{'suggests': 0.52, 'suggest': 0.49}
Verbal & Grammatical Forms	verb_inf_Ved	add is to added as understand is to	understood	understood	0.44	1	1	{'understood': 0.44, 'understanding': 0.09, 'understand': 0.05, '______': 0.03, '': 0.02}	0	0.435547	0	1	context	context|target	0.52	TRUE	TRUE	TRUE	target	{'understood': 0.52, 'understand': 0.49}
Verbal & Grammatical Forms	verb_Ving_Ved	involving is to involved as representing is to	represented	represented	0.44	1	1	{'represented': 0.44, 'represent': 0.09, 'representative': 0.07, '': 0.03, '__': 0.02}	0	0.443359	0	1	context	context|target	0.52	TRUE	TRUE	TRUE	target	{'represented': 0.52, 'representing': 0.47}
Morphological Modifiers	un+adj_reg	unexpected is to expected as unnoticed is to	noticed	noticed	0.43	1	1	{'noticed': 0.43, 'expected': 0.06, '______': 0.04, 'observed': 0.04, 'noticeable': 0.03}	0	0.429688	0	1	context	context|target	0.52	TRUE	TRUE	TRUE	target	{'noticed': 0.52, 'unnoticed': 0.49}
Verbal & Grammatical Forms	verb_inf_3pSg	includes is to include as requires is to	require	require	0.43	1	1	{'require': 0.43, 'exclude': 0.05, 'include': 0.05, 'need': 0.03, 'depend': 0.02}	0	0.427734	0	1	context	context|target	0.52	TRUE	TRUE	TRUE	target	{'require': 0.52, 'requires': 0.47}
Verbal & Grammatical Forms	noun_plural_irreg	duties is to duty as societies is to	society	society	0.43	1	1	{'society': 0.43, 'societies': 0.04, 'social': 0.03, 'the': 0.02, 'be': 0.02}	0	0.427734	0	1	context	context|target	0.52	TRUE	TRUE	TRUE	target	{'society': 0.52, 'societies': 0.48}
Verbal & Grammatical Forms	verb_inf_Ving	following is to follow as maintaining is to	maintain	maintain	0.43	1	1	{'maintain': 0.43, 'keep': 0.06, 'maintenance': 0.04, 'follow': 0.02, 'repair': 0.02}	0	0.427734	0	1	context	context|target	0.52	TRUE	TRUE	TRUE	target	{'maintain': 0.52, 'maintaining': 0.49}
Verbal & Grammatical Forms	verb_Ving_Ved	existed is to existing as heard is to	hearing	hearing	0.43	1	1	{'hearing': 0.43, 'heard': 0.09, 'hear': 0.04, 'existing': 0.04, 'being': 0.02}	0	0.427734	0	1	context	context|target	0.52	TRUE	TRUE	TRUE	target	{'hearing': 0.52, 'heard': 0.47}
Verbal & Grammatical Forms	verb_Ving_Ved	involving is to involved as sending is to	sent	sent	0.43	1	1	{'sent': 0.43, 'send': 0.08, '______': 0.04, '"': 0.02, '_____': 0.02}	0	0.427734	0	1	context	context|target	0.52	TRUE	TRUE	TRUE	target	{'sent': 0.52, 'sending': 0.49}
Verbal & Grammatical Forms	verb_3pSg_Ved	consisted is to consists as created is to	creates	create	0.43	0.5	1	{'create': 0.43, 'creates': 0.2, 'created': 0.05, '______': 0.02, '': 0.02}	1	0.204102	0.227539	0.99999	context	context|target	0.52	TRUE	TRUE	TRUE	target	{'creates': 0.52, 'created': 0.5}
Factual Knowledge	country_capital	Egypt is to Cairo as Jamaica is to	kingston	Kingston	0.42	1	1	{'Kingston': 0.42, '"': 0.03, ':': 0.03, 'Mont': 0.03}	0	0.423828	0	1	context	context|target	0.52	TRUE	TRUE	TRUE	target	{'kingston': 0.52, 'jamaica': 0.5}
Factual Knowledge	capital_world	Egypt is to Cairo as Jamaica is to	kingston	Kingston	0.42	1	1	{'Kingston': 0.42, '"': 0.03, ':': 0.03, 'Mont': 0.03}	0	0.423828	0	1	context	context|target	0.52	TRUE	TRUE	TRUE	target	{'kingston': 0.52, 'jamaica': 0.5}
Morphological Modifiers	adj_comparative	sexier is to sexy as stricter is to	strict	strict	0.42	1	1	{'strict': 0.42, 'stricter': 0.09, '______': 0.05, 'str': 0.03, '_____': 0.02}	0	0.421875	0	1	context	context|target	0.52	TRUE	TRUE	TRUE	target	{'strict': 0.52, 'stricter': 0.5}
Verbal & Grammatical Forms	verb_inf_Ving	add is to adding as include is to	including	including	0.42	1	1	{'including': 0.42, 'adding': 0.04, '...': 0.03, 'what': 0.03, 'inclusion': 0.02}	0	0.419922	0	1	context	context|target	0.52	TRUE	TRUE	TRUE	target	{'including': 0.52, 'include': 0.48}
Verbal & Grammatical Forms	verb_inf_3pSg	prevents is to prevent as tells is to	tell	tells	0.42	0	1	{'tells': 0.42, 'tell': 0.09, 'told': 0.06, 'prevents': 0.02, 'to': 0.01}	1	0.0874023	0.328613	0.99999	context	context|target	0.52	TRUE	TRUE	TRUE	target	{'tell': 0.52, 'tells': 0.47}
Verbal & Grammatical Forms	verb_inf_Ved	replace is to replaced as require is to	required	required	0.42	1	1	{'required': 0.42, 'requested': 0.05, 'require': 0.04, '': 0.03, '?': 0.02}	0	0.423828	0	1	context	context|target	0.52	TRUE	TRUE	TRUE	target	{'required': 0.52, 'require': 0.46}
Verbal & Grammatical Forms	verb_inf_Ved	added is to add as reduced is to	reduce	reduce	0.42	1	1	{'reduce': 0.42, 'reduced': 0.1, 'subtract': 0.08, 'add': 0.06, 'increase': 0.04}	0	0.417969	0	1	context	context|target	0.52	TRUE	TRUE	TRUE	target	{'reduce': 0.52, 'reduced': 0.49}
Morphological Modifiers	verb+ment_irreg	engage is to engagement as enjoy is to	enjoyment	enjoyment	0.41	1	1	{'enjoyment': 0.41, '______': 0.08, 'joy': 0.07, 'pleasure': 0.05, '__': 0.04}	0	0.40625	0	1	context	context|target	0.52	TRUE	TRUE	TRUE	target	{'enjoyment': 0.52, 'enjoy': 0.47}
Morphological Modifiers	comparative	weaker is to weak as stronger is to	strong	strong	0.41	1	1	{'strong': 0.41, '______': 0.03, '': 0.03, '"': 0.03, '_____': 0.03}	0	0.414062	0	1	context	context|target	0.52	TRUE	TRUE	TRUE	target	{'strong': 0.52, 'stronger': 0.51}
Morphological Modifiers	noun+less_reg	godless is to god as penniless is to	penny	penny	0.41	1	1	{'penny': 0.41, 'money': 0.14, 'penn': 0.12, 'poor': 0.03, '': 0.03}	0	0.414062	0	1	context	context|target	0.52	TRUE	TRUE	TRUE	target	{'penny': 0.52, 'penniless': 0.47}
Morphological Modifiers	re+verb_reg	reassign is to assign as reinterpret is to	interpret	cast	0.41	0	1	{'cast': 0.41, 'convert': 0.22, 'interpret': 0.1, 'reinterpret': 0.07, 'type': 0.05}	2	0.0966797	0.311523	0.99998	context	context|target	0.52	TRUE	TRUE	TRUE	target	{'interpret': 0.52, 'reinterpret': 0.49}
Verbal & Grammatical Forms	plural	women is to woman as dogs is to	dog	dog	0.41	1	1	{'dog': 0.41, 'dogs': 0.06, '____': 0.04, '______': 0.03, 'man': 0.03}	0	0.414062	0	1	context	context|target	0.52	TRUE	TRUE	TRUE	target	{'dog': 0.52, 'dogs': 0.48}
Verbal & Grammatical Forms	verb_3pSg_Ved	adds is to added as loses is to	lost	lost	0.41	1	1	{'lost': 0.41, 'subtract': 0.18, 'losses': 0.04, 'loses': 0.03, 'loss': 0.03}	0	0.410156	0	1	context	context|target	0.52	TRUE	TRUE	TRUE	target	{'lost': 0.52, 'loses': 0.48}
Morphological Modifiers	adj+ness_reg	awareness is to aware as seriousness is to	serious	serious	0.4	1	1	{'serious': 0.4, '______': 0.04, 'aware': 0.04, '': 0.02, '__': 0.02}	0	0.400391	0	1	context	context|target	0.52	TRUE	TRUE	TRUE	target	{'serious': 0.52, 'seriousness': 0.48}
Verbal & Grammatical Forms	verb_inf_Ving	add is to adding as believe is to	believing	believing	0.4	1	1	{'believing': 0.4, '': 0.02, '______': 0.02, '...': 0.02}	0	0.404297	0	1	context	context|target	0.52	TRUE	TRUE	TRUE	target	{'believing': 0.52, 'believe': 0.48}
Verbal & Grammatical Forms	verb_Ving_3pSg	considering is to considers as involving is to	involves	involving	0.4	0	1	{'involving': 0.4, 'involves': 0.17, 'involve': 0.14, 'invol': 0.05, 'involved': 0.03}	1	0.168945	0.235352	0.99999	context	context|target	0.52	TRUE	TRUE	TRUE	target	{'involves': 0.52, 'involving': 0.5}
Verbal & Grammatical Forms	verb_inf_3pSg	accepts is to accept as prevents is to	prevent	prevent	0.4	1	1	{'prevent': 0.4, 'not': 0.09, 'stop': 0.06, 'prevents': 0.03, 'reject': 0.03}	0	0.398438	0	1	context	context|target	0.52	TRUE	TRUE	TRUE	target	{'prevent': 0.52, 'prevents': 0.5}
Verbal & Grammatical Forms	verb_inf_Ved	add is to added as replace is to	replaced	replaced	0.4	1	1	{'replaced': 0.4, '?': 0.04, 'removed': 0.04, '': 0.04}	0	0.402344	0	1	context	context|target	0.52	TRUE	TRUE	TRUE	target	{'replaced': 0.52, 'replace': 0.49}
Verbal & Grammatical Forms	verb_Ving_Ved	involving is to involved as providing is to	provided	provided	0.4	1	1	{'provided': 0.4, '______': 0.04, 'involved': 0.04, '__': 0.02, '"': 0.02}	0	0.404297	0	1	context	context|target	0.52	TRUE	TRUE	TRUE	target	{'provided': 0.52, 'providing': 0.46}
Verbal & Grammatical Forms	verb_3pSg_Ved	expects is to expected as occurs is to	occurred	occurred	0.4	1	1	{'occurred': 0.4, 'occurs': 0.13, '______': 0.04, 'occurring': 0.03, 'occ': 0.03}	0	0.400391	0	1	context	context|target	0.52	TRUE	TRUE	TRUE	target	{'occurred': 0.52, 'occurs': 0.5}
Factual Knowledge	country_capital	Damascus is to Syria as Sofia is to	bulgaria	Bulgaria	0.39	1	1	{'Bulgaria': 0.39, 'what': 0.14, ':': 0.07, 'which': 0.06, '______': 0.03}	0	0.388672	0	1	context	context|target	0.52	TRUE	TRUE	TRUE	target	{'bulgaria': 0.52, 'sofia': 0.47}
Morphological Modifiers	adj_superlative	healthiest is to healthy as riskiest is to	risky	risky	0.39	1	1	{'risky': 0.39, '______': 0.06, '_____': 0.03, '"': 0.03, 'dangerous': 0.03}	0	0.392578	0	1	context	context|target	0.52	TRUE	TRUE	TRUE	target	{'risky': 0.52, 'riskiest': 0.5}
Morphological Modifiers	re+verb_reg	reconfigure is to configure as reexamine is to	examine	examine	0.39	1	1	{'examine': 0.39, 're': 0.17, 'check': 0.02, '': 0.02}	0	0.390625	0	1	context	context|target	0.52	TRUE	TRUE	TRUE	target	{'examine': 0.52, 'reexamine': 0.47}
Verbal & Grammatical Forms	verb_inf_3pSg	consider is to considers as send is to	sends	sent	0.39	0	1	{'sent': 0.39, 'sends': 0.16, 'sending': 0.05, 'send': 0.03, 'to': 0.01}	1	0.164062	0.228516	0.99999	context	context|target	0.52	TRUE	TRUE	TRUE	target	{'sends': 0.52, 'send': 0.5}
Verbal & Grammatical Forms	verb_inf_3pSg	happen is to happens as include is to	includes	includes	0.39	1	1	{'includes': 0.39, 'included': 0.27, 'includ': 0.07, 'including': 0.05, '': 0.01}	0	0.388672	0	1	context	context|target	0.52	TRUE	TRUE	TRUE	target	{'includes': 0.52, 'include': 0.51}
Verbal & Grammatical Forms	verb_inf_3pSg	exists is to exist as requires is to	require	require	0.39	1	1	{'require': 0.39, 'be': 0.37, 'have': 0.03, 'exist': 0.02, 'requires': 0.01}	0	0.392578	0	1	context	context|target	0.52	TRUE	TRUE	TRUE	target	{'require': 0.52, 'requires': 0.49}
Verbal & Grammatical Forms	verb_inf_Ved	become is to became as tell is to	told	told	0.39	1	1	{'told': 0.39, '______': 0.06, '__': 0.04, '____': 0.04, '': 0.03}	0	0.388672	0	1	context	context|target	0.52	TRUE	TRUE	TRUE	target	{'told': 0.52, 'tell': 0.49}
Verbal & Grammatical Forms	verb_Ving_Ved	decided is to deciding as developed is to	developing	developed	0.39	0	1	{'developed': 0.39, 'developing': 0.1, '______': 0.05, '': 0.04, '__': 0.03}	1	0.0981445	0.290527	0.99999	context	context|target	0.52	TRUE	TRUE	TRUE	target	{'developing': 0.52, 'developed': 0.48}
Verbal & Grammatical Forms	verb_3pSg_Ved	expected is to expects as occurred is to	occurs	occurred	0.39	0	1	{'occurred': 0.39, 'occurs': 0.22, 'occur': 0.06, 'occured': 0.05, 'has': 0.02}	1	0.22168	0.166992	0.99999	context	context|target	0.52	TRUE	TRUE	TRUE	target	{'occurs': 0.52, 'occurred': 0.49}
Morphological Modifiers	adj+ly_reg	practical is to practically as serious is to	seriously	seriously	0.38	1	1	{'seriously': 0.38, 'serious': 0.07, '______': 0.04, '__': 0.04, '': 0.02}	0	0.375	0	1	context	context|target	0.52	TRUE	TRUE	TRUE	target	{'seriously': 0.52, 'serious': 0.5}
Verbal & Grammatical Forms	verb_Ving_3pSg	appearing is to appears as requiring is to	requires	require	0.38	0.5	1	{'require': 0.38, 'appear': 0.1, 'be': 0.09, 'requires': 0.06, 'required': 0.05}	3	0.0649414	0.310059	0.99997	context	context|target	0.52	TRUE	TRUE	TRUE	target	{'requires': 0.52, 'requiring': 0.51}
Verbal & Grammatical Forms	verb_inf_3pSg	avoid is to avoids as consider is to	considers	considers	0.38	1	1	{'considers': 0.38, 'consider': 0.14, 'considered': 0.05, '': 0.02, '__': 0.02}	0	0.378906	0	1	context	context|target	0.52	TRUE	TRUE	TRUE	target	{'considers': 0.52, 'consider': 0.49}
Verbal & Grammatical Forms	verb_inf_3pSg	achieves is to achieve as agrees is to	agree	agree	0.38	1	1	{'agree': 0.38, 'agrees': 0.03, 'agreed': 0.02, 'achieve': 0.02, 'be': 0.02}	0	0.380859	0	1	context	context|target	0.52	TRUE	TRUE	TRUE	target	{'agree': 0.52, 'agrees': 0.49}
Verbal & Grammatical Forms	verb_inf_Ving	following is to follow as telling is to	tell	tell	0.38	1	1	{'tell': 0.38, 'hear': 0.04, 'telling': 0.04, 'follow': 0.03, 'following': 0.02}	0	0.378906	0	1	context	context|target	0.52	TRUE	TRUE	TRUE	target	{'tell': 0.52, 'telling': 0.48}
Verbal & Grammatical Forms	verb_Ving_Ved	existing is to existed as losing is to	lost	lost	0.38	1	1	{'lost': 0.38, 'won': 0.17, 'have': 0.08, 'win': 0.04, 'having': 0.04}	0	0.382812	0	1	context	context|target	0.52	TRUE	TRUE	TRUE	target	{'lost': 0.52, 'losing': 0.46}
Verbal & Grammatical Forms	verb_Ving_Ved	involving is to involved as telling is to	told	told	0.38	1	1	{'told': 0.38, '______': 0.07, 'tell': 0.07, '__': 0.04, '"': 0.03}	0	0.375	0	1	context	context|target	0.52	TRUE	TRUE	TRUE	target	{'told': 0.52, 'telling': 0.47}
Factual Knowledge	country_capital	Denmark is to Copenhagen as Syria is to	damascus	Damascus	0.37	1	1	{'Damascus': 0.37, '______': 0.09, 'Aleppo': 0.06, '__': 0.05, '____': 0.03}	0	0.371094	0	1	context	context|target	0.52	TRUE	TRUE	TRUE	target	{'damascus': 0.52, 'syria': 0.49}
Factual Knowledge	country_capital	Denmark is to Copenhagen as Norway is to	oslo	Oslo	0.37	1	1	{'Oslo': 0.37, '______': 0.06, 'A': 0.04, '__': 0.03, 'what': 0.03}	0	0.371094	0	1	context	context|target	0.52	TRUE	TRUE	TRUE	target	{'oslo': 0.52, 'norway': 0.48}
Factual Knowledge	capital_world	Japan is to Tokyo as Iran is to	tehran	Tehran	0.37	1	1	{'Tehran': 0.37, '______': 0.08, '__': 0.07, 'what': 0.02, '____': 0.02}	0	0.365234	0	1	context	context|target	0.52	TRUE	TRUE	TRUE	target	{'tehran': 0.52, 'iran': 0.48}
Factual Knowledge	capital_world	Denmark is to Copenhagen as Syria is to	damascus	Damascus	0.37	1	1	{'Damascus': 0.37, '______': 0.09, 'Aleppo': 0.06, '__': 0.05, '____': 0.03}	0	0.371094	0	1	context	context|target	0.52	TRUE	TRUE	TRUE	target	{'damascus': 0.52, 'syria': 0.49}
Morphological Modifiers	un+adj_reg	unintended is to intended as unnoticed is to	noticed	noticed	0.37	1	1	{'noticed': 0.37, 'intended': 0.14, 'observed': 0.04, 'intentional': 0.02, 'noted': 0.02}	0	0.371094	0	1	context	context|target	0.52	TRUE	TRUE	TRUE	target	{'noticed': 0.52, 'unnoticed': 0.48}
Semantic Relations	antonyms_gradable	incompetent is to competent as poor is to	rich	rich	0.37	1	1	{'rich': 0.37, 'wealthy': 0.1, '______': 0.05, '_____': 0.05, '____': 0.03}	0	0.371094	0	1	context	context|target	0.52	TRUE	TRUE	TRUE	target	{'rich': 0.52, 'poor': 0.48}
Verbal & Grammatical Forms	verb_inf_Ving	become is to becoming as enjoy is to	enjoying	enjoyment	0.37	0	1	{'enjoyment': 0.37, 'enjoying': 0.27, 'enjoyable': 0.04, '______': 0.03, 'becoming': 0.02}	1	0.271484	0.0996094	0.99999	context	context|target	0.52	TRUE	TRUE	TRUE	target	{'enjoying': 0.52, 'enjoy': 0.51}
Verbal & Grammatical Forms	past_tense	enhanced is to enhancing as said is to	saying	saying	0.37	1	1	{'saying': 0.37, 'say': 0.09, '______': 0.05, 'said': 0.05, '__': 0.03}	0	0.367188	0	1	context	context|target	0.52	TRUE	TRUE	TRUE	target	{'saying': 0.52, 'said': 0.5}
Verbal & Grammatical Forms	verb_inf_3pSg	provide is to provides as remain is to	remains	remains	0.37	1	1	{'remains': 0.37, '': 0.09, 'remain': 0.05, '?': 0.04}	0	0.365234	0	1	context	context|target	0.52	TRUE	TRUE	TRUE	target	{'remains': 0.52, 'remain': 0.51}
Verbal & Grammatical Forms	verb_inf_Ving	following is to follow as protecting is to	protect	protect	0.37	1	1	{'protect': 0.37, 'protector': 0.04, '______': 0.03, 'protecting': 0.02, 'be': 0.02}	0	0.369141	0	1	context	context|target	0.52	TRUE	TRUE	TRUE	target	{'protect': 0.52, 'protecting': 0.49}
Verbal & Grammatical Forms	verb_Ving_Ved	involved is to involving as represented is to	representing	representing	0.37	1	1	{'representing': 0.37, 'represent': 0.06, 'represented': 0.03, 'real': 0.03, '__': 0.03}	0	0.373047	0	1	context	context|target	0.52	TRUE	TRUE	TRUE	target	{'representing': 0.52, 'represented': 0.47}
Factual Knowledge	country_capital	Switzerland is to Bern as Egypt is to	cairo	Cairo	0.36	1	1	{'Cairo': 0.36, '______': 0.04, ':': 0.04, '_': 0.03}	0	0.361328	0	1	context	context|target	0.52	TRUE	TRUE	TRUE	target	{'cairo': 0.52, 'egypt': 0.49}
Factual Knowledge	country_capital	Syria is to Damascus as Canada is to	ottawa	Ottawa	0.36	1	1	{'Ottawa': 0.36, 'Toronto': 0.22, '__': 0.06, '______': 0.05, 'Montreal': 0.02}	0	0.357422	0	1	context	context|target	0.52	TRUE	TRUE	TRUE	target	{'ottawa': 0.52, 'canada': 0.5}
Factual Knowledge	capital_world	Switzerland is to Bern as Egypt is to	cairo	Cairo	0.36	1	1	{'Cairo': 0.36, '______': 0.04, ':': 0.04, '_': 0.03}	0	0.361328	0	1	context	context|target	0.52	TRUE	TRUE	TRUE	target	{'cairo': 0.52, 'egypt': 0.49}
Morphological Modifiers	re+verb_reg	reconnect is to connect as renegotiate is to	negotiate	renegot	0.36	0	1	{'renegot': 0.36, 'reconnect': 0.1, 're': 0.08, 'negotiate': 0.04, 'authenticate': 0.03}	3	0.043457	0.319824	0.99997	context	context|target	0.52	TRUE	TRUE	TRUE	target	{'negotiate': 0.52, 'renegotiate': 0.49}
Morphological Modifiers	verb+er_irreg	follow is to follower as lose is to	loser	loser	0.36	1	1	{'loser': 0.36, 'winner': 0.19, '______': 0.03, 'lo': 0.02, '__': 0.02}	0	0.357422	0	1	context	context|target	0.52	TRUE	TRUE	TRUE	target	{'loser': 0.52, 'lose': 0.48}
Verbal & Grammatical Forms	verb_Ving_3pSg	exists is to existing as requires is to	requiring	requiring	0.36	1	1	{'requiring': 0.36, 'required': 0.11, 'requirement': 0.09, 'requires': 0.06, 'necessary': 0.03}	0	0.357422	0	1	context	context|target	0.52	TRUE	TRUE	TRUE	target	{'requiring': 0.52, 'requires': 0.51}
Verbal & Grammatical Forms	verb_inf_3pSg	describes is to describe as includes is to	include	include	0.36	1	1	{'include': 0.36, 'describe': 0.07, 'includes': 0.03, 'be': 0.02, 'explain': 0.02}	0	0.359375	0	1	context	context|target	0.52	TRUE	TRUE	TRUE	target	{'include': 0.52, 'includes': 0.52}
Verbal & Grammatical Forms	verb_inf_3pSg	follows is to follow as prevents is to	prevent	prevent	0.36	1	1	{'prevent': 0.36, 'prevents': 0.1, 'follow': 0.04, 'permit': 0.03, '': 0.02}	0	0.357422	0	1	context	context|target	0.52	TRUE	TRUE	TRUE	target	{'prevent': 0.52, 'prevents': 0.5}
Morphological Modifiers	verb+able_reg	adjustable is to adjust as foreseeable is to	foresee	foresee	0.35	1	1	{'foresee': 0.35, 'fore': 0.18, 'forecast': 0.05, 'predict': 0.03, 'foreseeable': 0.02}	0	0.351562	0	1	context	context|target	0.52	TRUE	TRUE	TRUE	target	{'foresee': 0.52, 'foreseeable': 0.48}
Morphological Modifiers	re+verb_reg	reconnect is to connect as resolve is to	solve	resolve	0.35	0	1	{'resolve': 0.35, 'solve': 0.05, 'dissolve': 0.02, 'promise': 0.02, '': 0.01}	1	0.0498047	0.295898	0.99999	context	context|target	0.52	TRUE	TRUE	TRUE	target	{'solve': 0.52, 'resolve': 0.47}
Morphological Modifiers	verb+er_irreg	examiner is to examine as loser is to	lose	win	0.35	0	1	{'win': 0.35, 'lose': 0.22, 'examine': 0.04, 'loser': 0.04, 'be': 0.03}	1	0.223633	0.12207	0.99999	context	context|target	0.52	TRUE	TRUE	TRUE	target	{'lose': 0.52, 'loser': 0.51}
Verbal & Grammatical Forms	verb_inf_Ving	adding is to add as teaching is to	teach	learn	0.35	0	1	{'learn': 0.35, 'teach': 0.1, 'learning': 0.09, 'educate': 0.05, 'instruct': 0.03}	1	0.100586	0.249023	0.99999	context	context|target	0.52	TRUE	TRUE	TRUE	target	{'teach': 0.52, 'teaching': 0.47}
Verbal & Grammatical Forms	verb_inf_3pSg	develops is to develop as represents is to	represent	represent	0.35	1	1	{'represent': 0.35, 'be': 0.05, 'develop': 0.04, 'represents': 0.04, '': 0.02}	0	0.351562	0	1	context	context|target	0.52	TRUE	TRUE	TRUE	target	{'represent': 0.52, 'represents': 0.49}
Verbal & Grammatical Forms	verb_inf_3pSg	accepts is to accept as protects is to	protect	protect	0.35	1	1	{'protect': 0.35, 'protects': 0.17, 'accept': 0.03, 'defend': 0.01, 'be': 0.01}	0	0.351562	0	1	context	context|target	0.52	TRUE	TRUE	TRUE	target	{'protect': 0.52, 'protects': 0.5}
Verbal & Grammatical Forms	verb_inf_Ved	follow is to followed as tell is to	told	told	0.35	1	1	{'told': 0.35, '______': 0.05, '_____': 0.03, '__': 0.03, '"': 0.03}	0	0.347656	0	1	context	context|target	0.52	TRUE	TRUE	TRUE	target	{'told': 0.52, 'tell': 0.48}
Verbal & Grammatical Forms	verb_inf_Ved	reduced is to reduce as replaced is to	replace	replace	0.35	1	1	{'replace': 0.35, 'replaced': 0.21, 'replacement': 0.02, 'replacing': 0.02, '______': 0.02}	0	0.347656	0	1	context	context|target	0.52	TRUE	TRUE	TRUE	target	{'replace': 0.52, 'replaced': 0.47}
Verbal & Grammatical Forms	verb_3pSg_Ved	became is to becomes as required is to	requires	required	0.35	0	1	{'required': 0.35, 'requires': 0.21, 'require': 0.06, '?': 0.04, 'requested': 0.03}	1	0.210938	0.136719	0.99999	context	context|target	0.52	TRUE	TRUE	TRUE	target	{'requires': 0.52, 'required': 0.45}
Verbal & Grammatical Forms	verb_3pSg_Ved	occurred is to occurs as sent is to	sends	sent	0.35	0	1	{'sent': 0.35, 'sentence': 0.14, 'send': 0.09, 'sending': 0.04, 'sends': 0.03}	4	0.0250244	0.320679	0.99996	context	context|target	0.52	TRUE	TRUE	TRUE	target	{'sends': 0.52, 'sent': 0.48}
Morphological Modifiers	verb+able_reg	predictable is to predict as replaceable is to	replace	replace	0.34	1	1	{'replace': 0.34, 'ir': 0.07, 'be': 0.03, 'irre': 0.03, 'un': 0.02}	0	0.337891	0	1	context	context|target	0.52	TRUE	TRUE	TRUE	target	{'replace': 0.52, 'replaceable': 0.49}
Morphological Modifiers	adj+ly_reg	popular is to popularly as serious is to	seriously	seriously	0.34	1	1	{'seriously': 0.34, '______': 0.05, '?': 0.04, 'A': 0.04, '': 0.04}	0	0.339844	0	1	context	context|target	0.52	TRUE	TRUE	TRUE	target	{'seriously': 0.52, 'serious': 0.52}
Morphological Modifiers	adj+ly_reg	international is to internationally as serious is to	seriously	seriously	0.34	1	1	{'seriously': 0.34, '?': 0.04, '': 0.04, '______': 0.03, '__': 0.03}	0	0.341797	0	1	context	context|target	0.52	TRUE	TRUE	TRUE	target	{'seriously': 0.52, 'serious': 0.51}
Verbal & Grammatical Forms	verb_Ving_3pSg	becoming is to becomes as publishing is to	publishes	publish	0.34	0.5	1	{'publish': 0.34, 'publishes': 0.11, '__': 0.07, '______': 0.06, 'public': 0.04}	1	0.108887	0.227051	0.99999	context	context|target	0.52	TRUE	TRUE	TRUE	target	{'publishes': 0.52, 'publishing': 0.49}
Verbal & Grammatical Forms	verb_Ving_3pSg	appears is to appearing as considers is to	considering	considering	0.34	1	1	{'considering': 0.34, 'consider': 0.19, 'considered': 0.09, 'considers': 0.07, 'consideration': 0.02}	0	0.339844	0	1	context	context|target	0.52	TRUE	TRUE	TRUE	target	{'considering': 0.52, 'considers': 0.49}
Verbal & Grammatical Forms	verb_inf_3pSg	improves is to improve as provides is to	provide	provide	0.34	1	1	{'provide': 0.34, 'provides': 0.21, 'provided': 0.02, '': 0.02, 'improve': 0.02}	0	0.341797	0	1	context	context|target	0.52	TRUE	TRUE	TRUE	target	{'provide': 0.52, 'provides': 0.49}
Verbal & Grammatical Forms	verb_Ving_Ved	existing is to existed as locating is to	located	locate	0.34	0.5	1	{'locate': 0.34, 'located': 0.17, 'be': 0.09, 'location': 0.06, 'loc': 0.02}	1	0.172852	0.170898	0.99999	context	context|target	0.52	TRUE	TRUE	TRUE	target	{'located': 0.52, 'locating': 0.45}
Verbal & Grammatical Forms	verb_Ving_Ved	adding is to added as involving is to	involved	involved	0.34	1	1	{'involved': 0.34, 'involve': 0.12, 'added': 0.03, 'add': 0.03, 'involving': 0.02}	0	0.339844	0	1	context	context|target	0.52	TRUE	TRUE	TRUE	target	{'involved': 0.52, 'involving': 0.51}
Factual Knowledge	country_capital	England is to London as Spain is to	madrid	Madrid	0.33	1	1	{'Madrid': 0.33, '______': 0.11, 'Barcelona': 0.07, 'what': 0.05, '__': 0.03}	0	0.330078	0	1	context	context|target	0.52	TRUE	TRUE	TRUE	target	{'madrid': 0.52, 'spain': 0.48}
Factual Knowledge	country_capital	Athens is to Greece as Lisbon is to	portugal	Portugal	0.33	1	1	{'Portugal': 0.33, 'what': 0.07, '______': 0.06, '_____': 0.05, 'which': 0.04}	0	0.333984	0	1	context	context|target	0.52	TRUE	TRUE	TRUE	target	{'portugal': 0.52, 'lisbon': 0.48}
Factual Knowledge	capital_world	England is to London as Spain is to	madrid	Madrid	0.33	1	1	{'Madrid': 0.33, '______': 0.11, 'Barcelona': 0.07, 'what': 0.05, '__': 0.03}	0	0.330078	0	1	context	context|target	0.52	TRUE	TRUE	TRUE	target	{'madrid': 0.52, 'spain': 0.48}
Morphological Modifiers	adj_superlative	healthiest is to healthy as proudest is to	proud	proud	0.33	1	1	{'proud': 0.33, '______': 0.09, '_____': 0.05, '____': 0.05, '__': 0.02}	0	0.328125	0	1	context	context|target	0.52	TRUE	TRUE	TRUE	target	{'proud': 0.52, 'proudest': 0.48}
Morphological Modifiers	adj+ness_reg	effectiveness is to effective as massiveness is to	massive	massive	0.33	1	1	{'massive': 0.33, '______': 0.06, '': 0.03, 'mass': 0.02}	0	0.332031	0	1	context	context|target	0.52	TRUE	TRUE	TRUE	target	{'massive': 0.52, 'massiveness': 0.5}
Verbal & Grammatical Forms	verb_inf_3pSg	avoid is to avoids as prevent is to	prevents	prevents	0.33	1	1	{'prevents': 0.33, 'prevention': 0.1, '______': 0.08, 'prevent': 0.05, '': 0.04}	0	0.328125	0	1	context	context|target	0.52	TRUE	TRUE	TRUE	target	{'prevents': 0.52, 'prevent': 0.51}
Verbal & Grammatical Forms	verb_inf_Ved	become is to became as receive is to	received	received	0.33	1	1	{'received': 0.33, '': 0.06, '______': 0.05, '__': 0.04, 'receive': 0.03}	0	0.333984	0	1	context	context|target	0.52	TRUE	TRUE	TRUE	target	{'received': 0.52, 'receive': 0.49}
Verbal & Grammatical Forms	verb_inf_Ving	maintaining is to maintain as remaining is to	remain	remain	0.33	1	1	{'remain': 0.33, 'maintain': 0.07, 'continue': 0.04, 'be': 0.03, 'become': 0.03}	0	0.330078	0	1	context	context|target	0.52	TRUE	TRUE	TRUE	target	{'remain': 0.52, 'remaining': 0.48}
Verbal & Grammatical Forms	verb_inf_Ving	seem is to seeming as tell is to	telling	telling	0.33	1	1	{'telling': 0.33, '______': 0.06, '____': 0.03, '__': 0.03, '': 0.03}	0	0.326172	0	1	context	context|target	0.52	TRUE	TRUE	TRUE	target	{'telling': 0.52, 'tell': 0.48}
Factual Knowledge	capital_world	Slovakia is to Bratislava as Denmark is to	copenhagen	Copenhagen	0.32	1	1	{'Copenhagen': 0.32, 'what': 0.1, '______': 0.05, '?': 0.03, '__': 0.02}	0	0.318359	0	1	context	context|target	0.52	TRUE	TRUE	TRUE	target	{'copenhagen': 0.52, 'denmark': 0.51}
Morphological Modifiers	adj_superlative	cheapest is to cheap as densest is to	dense	dense	0.32	1	1	{'dense': 0.32, '______': 0.06, '_____': 0.02, 'what': 0.02, '...': 0.02}	0	0.324219	0	1	context	context|target	0.52	TRUE	TRUE	TRUE	target	{'dense': 0.52, 'densest': 0.47}
Morphological Modifiers	verb+ment_irreg	acknowledgement is to acknowledge as development is to	develop	develop	0.32	1	1	{'develop': 0.32, 'be': 0.03, 'acknowledge': 0.02, 'make': 0.02, '': 0.02}	0	0.324219	0	1	context	context|target	0.52	TRUE	TRUE	TRUE	target	{'develop': 0.52, 'development': 0.5}
Morphological Modifiers	verb+ment_irreg	engagement is to engage as enhancement is to	enhance	enhance	0.32	1	1	{'enhance': 0.32, 'augment': 0.04, 'enrich': 0.02, '': 0.02, 'height': 0.02}	0	0.316406	0	1	context	context|target	0.52	TRUE	TRUE	TRUE	target	{'enhance': 0.52, 'enhancement': 0.5}
Morphological Modifiers	noun+less_reg	lawless is to law as remorseless is to	remorse	remorse	0.32	1	1	{'remorse': 0.32, 'regret': 0.05, '______': 0.03, '_____': 0.03, '': 0.03}	0	0.322266	0	1	context	context|target	0.52	TRUE	TRUE	TRUE	target	{'remorse': 0.52, 'remorseless': 0.5}
Verbal & Grammatical Forms	plural	women is to woman as cars is to	car	car	0.32	1	1	{'car': 0.32, '______': 0.05, 'automobile': 0.04, '__': 0.03, 'cars': 0.02}	0	0.324219	0	1	context	context|target	0.52	TRUE	TRUE	TRUE	target	{'car': 0.52, 'cars': 0.48}
Verbal & Grammatical Forms	verb_inf_3pSg	improves is to improve as promotes is to	promote	promote	0.32	1	1	{'promote': 0.32, 'advertise': 0.06, 'advance': 0.05, 'improve': 0.02, 'enhance': 0.02}	0	0.322266	0	1	context	context|target	0.52	TRUE	TRUE	TRUE	target	{'promote': 0.52, 'promotes': 0.48}
Verbal & Grammatical Forms	verb_inf_3pSg	develop is to develops as include is to	includes	includes	0.32	1	1	{'includes': 0.32, '': 0.07, '?': 0.05, '______': 0.04}	0	0.318359	0	1	context	context|target	0.52	TRUE	TRUE	TRUE	target	{'includes': 0.52, 'include': 0.52}
Verbal & Grammatical Forms	verb_inf_Ving	learn is to learning as maintain is to	maintaining	maintenance	0.32	0	1	{'maintenance': 0.32, 'maintaining': 0.12, '______': 0.04, '__': 0.04, '____': 0.02}	1	0.118652	0.203613	0.99999	context	context|target	0.52	TRUE	TRUE	TRUE	target	{'maintaining': 0.52, 'maintain': 0.49}
Verbal & Grammatical Forms	verb_inf_Ving	learning is to learn as protecting is to	protect	protect	0.32	1	1	{'protect': 0.32, 'protection': 0.04, 'guard': 0.02, 'be': 0.02, 'shield': 0.02}	0	0.318359	0	1	context	context|target	0.52	TRUE	TRUE	TRUE	target	{'protect': 0.52, 'protecting': 0.5}
Verbal & Grammatical Forms	verb_Ving_Ved	appeared is to appearing as improved is to	improving	improving	0.32	1	1	{'improving': 0.32, 'improvement': 0.09, 'improved': 0.06, 'being': 0.05, 'the': 0.03}	0	0.322266	0	1	context	context|target	0.52	TRUE	TRUE	TRUE	target	{'improving': 0.52, 'improved': 0.48}
Factual Knowledge	country_capital	Greece is to Athens as Jamaica is to	kingston	Kingston	0.31	1	1	{'Kingston': 0.31, 'Mont': 0.1, '______': 0.05, '__': 0.04, '...': 0.03}	0	0.306641	0	1	context	context|target	0.52	TRUE	TRUE	TRUE	target	{'kingston': 0.52, 'jamaica': 0.5}
Morphological Modifiers	verb+ment_irreg	encouragement is to encourage as involvement is to	involve	involve	0.31	1	1	{'involve': 0.31, 'engage': 0.08, 'participate': 0.03, 'be': 0.03, '': 0.02}	0	0.310547	0	1	context	context|target	0.52	TRUE	TRUE	TRUE	target	{'involve': 0.52, 'involvement': 0.48}
Verbal & Grammatical Forms	verb_inf_3pSg	learn is to learns as seem is to	seems	seems	0.31	1	1	{'seems': 0.31, 'sees': 0.13, '______': 0.05, '': 0.04, '_____': 0.03}	0	0.314453	0	1	context	context|target	0.52	TRUE	TRUE	TRUE	target	{'seems': 0.52, 'seem': 0.5}
Verbal & Grammatical Forms	verb_inf_3pSg	describes is to describe as sends is to	send	send	0.31	1	1	{'send': 0.31, 'sends': 0.16, 'describe': 0.03, 'be': 0.02, 'describes': 0.01}	0	0.314453	0	1	context	context|target	0.52	TRUE	TRUE	TRUE	target	{'send': 0.52, 'sends': 0.5}
Verbal & Grammatical Forms	verb_3pSg_Ved	becomes is to became as continues is to	continued	continued	0.31	1	1	{'continued': 0.31, '': 0.05, '__': 0.06, '______': 0.04}	0	0.310547	0	1	context	context|target	0.52	TRUE	TRUE	TRUE	target	{'continued': 0.52, 'continues': 0.47}
Morphological Modifiers	verb+ment_irreg	entertain is to entertainment as harass is to	harassment	harassment	0.3	1	1	{'harassment': 0.3, '': 0.04, '______': 0.04, '__': 0.04, 'h': 0.03}	0	0.304688	0	1	context	context|target	0.52	TRUE	TRUE	TRUE	target	{'harassment': 0.52, 'harass': 0.49}
Morphological Modifiers	verb+ment_irreg	enhance is to enhancement as punish is to	punishment	punishment	0.3	1	1	{'punishment': 0.3, '__': 0.09, '______': 0.09, '_____': 0.04, '': 0.03}	0	0.304688	0	1	context	context|target	0.52	TRUE	TRUE	TRUE	target	{'punishment': 0.52, 'punish': 0.48}
Semantic Relations	animal_sound	chirrup is to songbird as gobble is to	turkey	turkey	0.3	1	1	{'turkey': 0.3, '______': 0.08, ':': 0.05, '': 0.04}	0	0.302734	0	1	context	context|target	0.52	TRUE	TRUE	TRUE	target	{'turkey': 0.52, 'gobble': 0.49}
Verbal & Grammatical Forms	verb_Ving_3pSg	appears is to appearing as exists is to	existing	existence	0.3	0	1	{'existence': 0.3, 'exist': 0.25, 'existing': 0.19, 'being': 0.02, 'exists': 0.02}	2	0.192383	0.106445	0.99998	context	context|target	0.52	TRUE	TRUE	TRUE	target	{'existing': 0.52, 'exists': 0.49}
Verbal & Grammatical Forms	verb_inf_3pSg	avoid is to avoids as provide is to	provides	provides	0.3	1	1	{'provides': 0.3, '': 0.05, '______': 0.05, 'provide': 0.03, '?': 0.03}	0	0.304688	0	1	context	context|target	0.52	TRUE	TRUE	TRUE	target	{'provides': 0.52, 'provide': 0.49}
Verbal & Grammatical Forms	verb_inf_3pSg	avoid is to avoids as believe is to	believes	believes	0.3	1	1	{'believes': 0.3, 'believe': 0.13, 'belief': 0.07, '______': 0.04, '__': 0.03}	0	0.304688	0	1	context	context|target	0.52	TRUE	TRUE	TRUE	target	{'believes': 0.52, 'believe': 0.48}
Verbal & Grammatical Forms	verb_inf_3pSg	achieves is to achieve as contains is to	contain	contain	0.3	1	1	{'contain': 0.3, 'be': 0.09, 'have': 0.05, 'achieve': 0.04, 'contains': 0.04}	0	0.302734	0	1	context	context|target	0.52	TRUE	TRUE	TRUE	target	{'contain': 0.52, 'contains': 0.49}
Verbal & Grammatical Forms	verb_inf_3pSg	applies is to apply as prevents is to	prevent	prevents	0.3	0	1	{'prevents': 0.3, 'prevent': 0.17, 'pre': 0.02, 'permits': 0.02, 'to': 0.01}	1	0.172852	0.131836	0.99999	context	context|target	0.52	TRUE	TRUE	TRUE	target	{'prevent': 0.52, 'prevents': 0.5}
Verbal & Grammatical Forms	verb_inf_3pSg	develop is to develops as seem is to	seems	seems	0.3	1	1	{'seems': 0.3, '': 0.12, '?': 0.04, '______': 0.04}	0	0.300781	0	1	context	context|target	0.52	TRUE	TRUE	TRUE	target	{'seems': 0.52, 'seem': 0.5}
Verbal & Grammatical Forms	verb_inf_3pSg	accepts is to accept as continues is to	continue	continue	0.3	1	1	{'continue': 0.3, 'accept': 0.06, 'go': 0.04, 'keep': 0.03, 'be': 0.03}	0	0.304688	0	1	context	context|target	0.52	TRUE	TRUE	TRUE	target	{'continue': 0.52, 'continues': 0.5}
Verbal & Grammatical Forms	verb_inf_Ving	continue is to continuing as maintain is to	maintaining	maintaining	0.3	1	1	{'maintaining': 0.3, '______': 0.07, '__': 0.06, 'maintenance': 0.06, '?': 0.03}	0	0.300781	0	1	context	context|target	0.52	TRUE	TRUE	TRUE	target	{'maintaining': 0.52, 'maintain': 0.48}
Verbal & Grammatical Forms	verb_Ving_Ved	existing is to existed as improving is to	improved	improved	0.3	1	1	{'improved': 0.3, 'better': 0.05, 'improve': 0.05, 'perfect': 0.03, 'improvement': 0.02}	0	0.302734	0	1	context	context|target	0.52	TRUE	TRUE	TRUE	target	{'improved': 0.52, 'improving': 0.48}
Factual Knowledge	capital_world	Iran is to Tehran as Canada is to	ottawa	Ottawa	0.29	1	1	{'Ottawa': 0.29, 'Toronto': 0.13, ':': 0.06, '______': 0.06, '__': 0.05}	0	0.294922	0	1	context	context|target	0.52	TRUE	TRUE	TRUE	target	{'ottawa': 0.52, 'canada': 0.5}
Morphological Modifiers	verb+tion_irreg	compile is to compilation as stabilize is to	stabilization	stabilization	0.29	1	1	{'stabilization': 0.29, 'stabil': 0.05, '__': 0.04, 'stability': 0.04, 'what': 0.04}	0	0.294922	0	1	context	context|target	0.52	TRUE	TRUE	TRUE	target	{'stabilization': 0.52, 'stabilize': 0.49}
Morphological Modifiers	re+verb_reg	reconnect is to connect as rediscover is to	discover	redis	0.29	0	1	{'redis': 0.29, 'discover': 0.15, 'reconnect': 0.03, 'find': 0.03, 're': 0.03}	1	0.145508	0.143555	0.99999	context	context|target	0.52	TRUE	TRUE	TRUE	target	{'discover': 0.52, 'rediscover': 0.48}
Morphological Modifiers	verb+er_irreg	defender is to defend as teacher is to	teach	teach	0.29	1	1	{'teach': 0.29, 'educate': 0.14, 'instruct': 0.1, '__': 0.04, '______': 0.03}	0	0.294922	0	1	context	context|target	0.52	TRUE	TRUE	TRUE	target	{'teach': 0.52, 'teacher': 0.51}
Verbal & Grammatical Forms	verb_inf_3pSg	adds is to add as includes is to	include	include	0.29	1	1	{'include': 0.29, 'includes': 0.03, 'import': 0.03, 'add': 0.03, '#': 0.02}	0	0.294922	0	1	context	context|target	0.52	TRUE	TRUE	TRUE	target	{'include': 0.52, 'includes': 0.51}
Verbal & Grammatical Forms	verb_inf_3pSg	allows is to allow as creates is to	create	create	0.29	1	1	{'create': 0.29, 'allow': 0.12, 'creates': 0.04, 'creation': 0.02, 'allows': 0.02}	0	0.289062	0	1	context	context|target	0.52	TRUE	TRUE	TRUE	target	{'create': 0.52, 'creates': 0.5}
Morphological Modifiers	verb+ment_irreg	enhance is to enhancement as harass is to	harassment	harassment	0.28	1	1	{'harassment': 0.28, '__': 0.12, '______': 0.1, '?': 0.04, '_____': 0.04}	0	0.277344	0	1	context	context|target	0.52	TRUE	TRUE	TRUE	target	{'harassment': 0.52, 'harass': 0.48}
Morphological Modifiers	adj+ness_reg	obvious is to obviousness as useful is to	usefulness	utility	0.28	0	1	{'utility': 0.28, 'usefulness': 0.28, 'useless': 0.1, 'use': 0.08, 'obvious': 0.03}	1	0.279297	0	0.99999	context	context|target	0.52	TRUE	TRUE	TRUE	target	{'usefulness': 0.52, 'useful': 0.49}
Semantic Relations	antonyms_gradable	hot is to cold as large is to	small	small	0.28	1	1	{'small': 0.28, '': 0.03, '?': 0.05, ':': 0.03}	0	0.28125	0	1	context	context|target	0.52	TRUE	TRUE	TRUE	target	{'small': 0.52, 'large': 0.49}
Verbal & Grammatical Forms	verb_inf_Ving	achieve is to achieving as include is to	including	including	0.28	1	1	{'including': 0.28, 'include': 0.05, 'included': 0.05, 'inclusion': 0.03, 'includ': 0.03}	0	0.277344	0	1	context	context|target	0.52	TRUE	TRUE	TRUE	target	{'including': 0.52, 'include': 0.48}
Verbal & Grammatical Forms	verb_Ving_3pSg	manages is to managing as requires is to	requiring	requires	0.28	0	1	{'requires': 0.28, 'required': 0.04, '': 0.02, 'requiring': 0.02}	3	0.0216064	0.25769	0.99997	context	context|target	0.52	TRUE	TRUE	TRUE	target	{'requiring': 0.52, 'requires': 0.5}
Verbal & Grammatical Forms	verb_Ving_3pSg	containing is to contains as requiring is to	requires	requires	0.28	1	1	{'requires': 0.28, 'require': 0.12, '': 0.03, '______': 0.04}	0	0.28125	0	1	context	context|target	0.52	TRUE	TRUE	TRUE	target	{'requires': 0.52, 'requiring': 0.51}
Verbal & Grammatical Forms	verb_inf_3pSg	avoids is to avoid as continues is to	continue	avoid	0.28	0	1	{'avoid': 0.28, 'continue': 0.12, 'be': 0.03, 'go': 0.02, 'do': 0.01}	1	0.118164	0.165039	0.99999	context	context|target	0.52	TRUE	TRUE	TRUE	target	{'continue': 0.52, 'continues': 0.5}
Verbal & Grammatical Forms	verb_inf_3pSg	continues is to continue as sends is to	send	sent	0.28	0	1	{'sent': 0.28, 'send': 0.21, 'sends': 0.05, 'sending': 0.03, 'continue': 0.02}	1	0.207031	0.0761719	0.99999	context	context|target	0.52	TRUE	TRUE	TRUE	target	{'send': 0.52, 'sends': 0.47}
Verbal & Grammatical Forms	verb_inf_3pSg	adds is to add as considers is to	consider	consider	0.28	1	1	{'consider': 0.28, 'think': 0.04, 'add': 0.03, 'considers': 0.02, 'see': 0.02}	0	0.275391	0	1	context	context|target	0.52	TRUE	TRUE	TRUE	target	{'consider': 0.52, 'considers': 0.49}
Verbal & Grammatical Forms	verb_inf_Ved	followed is to follow as replaced is to	replace	replaced	0.28	0	1	{'replaced': 0.28, 'replace': 0.23, '': 0.02, 'be': 0.02}	1	0.230469	0.046875	0.99999	context	context|target	0.52	TRUE	TRUE	TRUE	target	{'replace': 0.52, 'replaced': 0.51}
Verbal & Grammatical Forms	verb_inf_Ved	become is to became as provide is to	provided	provided	0.28	1	1	{'provided': 0.28, '______': 0.07, '': 0.04, '__': 0.03}	0	0.28125	0	1	context	context|target	0.52	TRUE	TRUE	TRUE	target	{'provided': 0.52, 'provide': 0.48}
Verbal & Grammatical Forms	verb_inf_Ved	create is to created as replace is to	replaced	replaced	0.28	1	1	{'replaced': 0.28, '?': 0.05, '': 0.04, '__': 0.03, '______': 0.03}	0	0.279297	0	1	context	context|target	0.52	TRUE	TRUE	TRUE	target	{'replaced': 0.52, 'replace': 0.5}
Verbal & Grammatical Forms	verb_Ving_Ved	existed is to existing as replaced is to	replacing	replaced	0.28	0	1	{'replaced': 0.28, 'replacing': 0.07, '______': 0.06, 'what': 0.06, 'replace': 0.04}	1	0.0742188	0.201172	0.99999	context	context|target	0.52	TRUE	TRUE	TRUE	target	{'replacing': 0.52, 'replaced': 0.47}
Verbal & Grammatical Forms	verb_Ving_Ved	involving is to involved as receiving is to	received	received	0.28	1	1	{'received': 0.28, '"': 0.04, '______': 0.03, '': 0.03}	0	0.283203	0	1	context	context|target	0.52	TRUE	TRUE	TRUE	target	{'received': 0.52, 'receiving': 0.48}
Morphological Modifiers	verb+ment_irreg	advertisement is to advertise as requirement is to	require	require	0.27	1	1	{'require': 0.27, 'be': 0.05, 'fulfill': 0.04, 'do': 0.03, 'requirement': 0.03}	0	0.267578	0	1	context	context|target	0.52	TRUE	TRUE	TRUE	target	{'require': 0.52, 'requirement': 0.47}
Morphological Modifiers	adj+ness_reg	hotness is to hot as massiveness is to	massive	massive	0.27	1	1	{'massive': 0.27, 'mass': 0.22, 'what': 0.03, '______': 0.03, 'heavy': 0.03}	0	0.269531	0	1	context	context|target	0.52	TRUE	TRUE	TRUE	target	{'massive': 0.52, 'massiveness': 0.5}
Morphological Modifiers	verb+ment_irreg	engage is to engagement as entertain is to	entertainment	entertainment	0.27	1	1	{'entertainment': 0.27, '______': 0.11, '__': 0.09, 'engagement': 0.04, 'ent': 0.02}	0	0.273438	0	1	context	context|target	0.52	TRUE	TRUE	TRUE	target	{'entertainment': 0.52, 'entertain': 0.49}
Morphological Modifiers	comparative	weak is to weaker as strong is to	stronger	stronger	0.27	1	1	{'stronger': 0.27, '______': 0.1, '': 0.06, '_____': 0.05, '__': 0.03}	0	0.273438	0	1	context	context|target	0.52	TRUE	TRUE	TRUE	target	{'stronger': 0.52, 'strong': 0.51}
Semantic Relations	antonyms_gradable	introvert is to extravert as normal is to	abnormal	abnormal	0.27	1	1	{'abnormal': 0.27, 'pathological': 0.1, 'dev': 0.07, 'psychotic': 0.06, 'neuro': 0.06}	0	0.267578	0	1	context	context|target	0.52	TRUE	TRUE	TRUE	target	{'abnormal': 0.52, 'normal': 0.5}
Verbal & Grammatical Forms	verb_inf_Ving	attend is to attending as protect is to	protecting	protecting	0.27	1	1	{'protecting': 0.27, 'protection': 0.08, '_': 0.06, '______': 0.05, '__': 0.05}	0	0.265625	0	1	context	context|target	0.52	TRUE	TRUE	TRUE	target	{'protecting': 0.52, 'protect': 0.49}
Verbal & Grammatical Forms	verb_inf_3pSg	improves is to improve as includes is to	include	include	0.27	1	1	{'include': 0.27, 'add': 0.05, 'improve': 0.04, 'be': 0.04, 'have': 0.03}	0	0.271484	0	1	context	context|target	0.52	TRUE	TRUE	TRUE	target	{'include': 0.52, 'includes': 0.5}
Verbal & Grammatical Forms	verb_inf_Ving	requiring is to require as spending is to	spend	spend	0.27	1	1	{'spend': 0.27, 'save': 0.09, 'be': 0.05, 'require': 0.04, 'have': 0.03}	0	0.271484	0	1	context	context|target	0.52	TRUE	TRUE	TRUE	target	{'spend': 0.52, 'spending': 0.5}
Morphological Modifiers	verb+ment_irreg	develop is to development as establish is to	establishment	establishment	0.26	1	1	{'establishment': 0.26, '______': 0.08, '': 0.04, '__': 0.05}	0	0.257812	0	1	context	context|target	0.52	TRUE	TRUE	TRUE	target	{'establishment': 0.52, 'establish': 0.47}
Morphological Modifiers	verb+tion_irreg	illumination is to illumine as minimization is to	minimize	minimize	0.26	1	1	{'minimize': 0.26, '______': 0.07, '': 0.05, '__': 0.03}	0	0.255859	0	1	context	context|target	0.52	TRUE	TRUE	TRUE	target	{'minimize': 0.52, 'minimization': 0.5}
Morphological Modifiers	superlative	strongest is to strong as hottest is to	hot	hot	0.26	1	1	{'hot': 0.26, '"': 0.04, 'hottest': 0.03, '': 0.03, '______': 0.03}	0	0.255859	0	1	context	context|target	0.52	TRUE	TRUE	TRUE	target	{'hot': 0.52, 'hottest': 0.48}
Morphological Modifiers	adj+ly_reg	global is to globally as serious is to	seriously	seriously	0.26	1	1	{'seriously': 0.26, '______': 0.06, 'serious': 0.04, '__': 0.04, '...': 0.03}	0	0.261719	0	1	context	context|target	0.52	TRUE	TRUE	TRUE	target	{'seriously': 0.52, 'serious': 0.51}
Verbal & Grammatical Forms	verb_Ving_3pSg	managing is to manages as requiring is to	requires	requires	0.26	1	1	{'requires': 0.26, 'require': 0.13, 'requiring': 0.08, '______': 0.05, '__': 0.04}	0	0.257812	0	1	context	context|target	0.52	TRUE	TRUE	TRUE	target	{'requires': 0.52, 'requiring': 0.5}
Verbal & Grammatical Forms	verb_inf_Ving	add is to adding as remain is to	remaining	subtract	0.26	0	1	{'subtract': 0.26, 'dividing': 0.08, 'remaining': 0.06, 'remain': 0.03, 'what': 0.03}	2	0.0578613	0.201904	0.99998	context	context|target	0.52	TRUE	TRUE	TRUE	target	{'remaining': 0.52, 'remain': 0.48}
Verbal & Grammatical Forms	verb_Ving_3pSg	contains is to containing as follows is to	following	following	0.26	1	1	{'following': 0.26, 'follows': 0.09, 'follow': 0.08, '': 0.05, 'followed': 0.03}	0	0.257812	0	1	context	context|target	0.52	TRUE	TRUE	TRUE	target	{'following': 0.52, 'follows': 0.49}
Verbal & Grammatical Forms	past_tense	enhanced is to enhancing as looked is to	looking	looking	0.26	1	1	{'looking': 0.26, '______': 0.07, 'look': 0.05, 'seeing': 0.04, '?': 0.03}	0	0.257812	0	1	context	context|target	0.52	TRUE	TRUE	TRUE	target	{'looking': 0.52, 'looked': 0.49}
Verbal & Grammatical Forms	verb_inf_3pSg	avoids is to avoid as protects is to	protect	protect	0.26	1	1	{'protect': 0.26, 'protects': 0.11, 'guard': 0.02, 'shield': 0.02, 'avoid': 0.02}	0	0.259766	0	1	context	context|target	0.52	TRUE	TRUE	TRUE	target	{'protect': 0.52, 'protects': 0.49}
Verbal & Grammatical Forms	verb_inf_3pSg	agree is to agrees as seem is to	seems	seems	0.26	1	1	{'seems': 0.26, '': 0.05, '?': 0.06, 'sees': 0.05}	0	0.263672	0	1	context	context|target	0.52	TRUE	TRUE	TRUE	target	{'seems': 0.52, 'seem': 0.5}
Verbal & Grammatical Forms	verb_inf_3pSg	remember is to remembers as send is to	sends	sends	0.26	1	1	{'sends': 0.26, '______': 0.05, 'send': 0.05, '__': 0.04, 'sent': 0.03}	0	0.255859	0	1	context	context|target	0.52	TRUE	TRUE	TRUE	target	{'sends': 0.52, 'send': 0.5}
Verbal & Grammatical Forms	verb_inf_3pSg	develops is to develop as includes is to	include	include	0.26	1	1	{'include': 0.26, 'includes': 0.05, 'be': 0.05, 'have': 0.02, 'develop': 0.02}	0	0.261719	0	1	context	context|target	0.52	TRUE	TRUE	TRUE	target	{'include': 0.52, 'includes': 0.52}
Verbal & Grammatical Forms	verb_inf_3pSg	accepts is to accept as describes is to	describe	describe	0.26	1	1	{'describe': 0.26, 'tell': 0.04, 'say': 0.04, 'give': 0.03, 'state': 0.03}	0	0.255859	0	1	context	context|target	0.52	TRUE	TRUE	TRUE	target	{'describe': 0.52, 'describes': 0.47}
Verbal & Grammatical Forms	verb_inf_Ved	followed is to follow as told is to	tell	tell	0.26	1	1	{'tell': 0.26, 'told': 0.18, 'do': 0.09, 'be': 0.06, 'obey': 0.04}	0	0.263672	0	1	context	context|target	0.52	TRUE	TRUE	TRUE	target	{'tell': 0.52, 'told': 0.48}
Verbal & Grammatical Forms	verb_inf_Ving	expect is to expecting as maintain is to	maintaining	maintaining	0.26	1	1	{'maintaining': 0.26, '______': 0.12, '__': 0.04, '____': 0.03, '': 0.03}	0	0.259766	0	1	context	context|target	0.52	TRUE	TRUE	TRUE	target	{'maintaining': 0.52, 'maintain': 0.5}
Verbal & Grammatical Forms	verb_Ving_3pSg	appears is to appearing as relates is to	relating	relation	0.25	0	1	{'relation': 0.25, 'relating': 0.08, 'related': 0.05, 'the': 0.04, 'being': 0.04}	1	0.0776367	0.17627	0.99999	context	context|target	0.52	TRUE	TRUE	TRUE	target	{'relating': 0.52, 'relates': 0.5}
Verbal & Grammatical Forms	verb_Ving_3pSg	appears is to appearing as teaches is to	teaching	teaching	0.25	1	1	{'teaching': 0.25, 'teach': 0.15, 'learning': 0.09, 'learn': 0.04, 'teaches': 0.04}	0	0.251953	0	1	context	context|target	0.52	TRUE	TRUE	TRUE	target	{'teaching': 0.52, 'teaches': 0.49}
Verbal & Grammatical Forms	verb_inf_3pSg	enables is to enable as includes is to	include	include	0.25	1	1	{'include': 0.25, 'includes': 0.08, 'enable': 0.05, 'including': 0.05, 'includ': 0.02}	0	0.245117	0	1	context	context|target	0.52	TRUE	TRUE	TRUE	target	{'include': 0.52, 'includes': 0.51}
Verbal & Grammatical Forms	verb_inf_3pSg	creates is to create as promotes is to	promote	promote	0.25	1	1	{'promote': 0.25, 'promotes': 0.04, 'advertise': 0.02, 'encourage': 0.02, 'protect': 0.02}	0	0.24707	0	1	context	context|target	0.52	TRUE	TRUE	TRUE	target	{'promote': 0.52, 'promotes': 0.48}
Verbal & Grammatical Forms	verb_inf_Ved	develop is to developed as provide is to	provided	provided	0.25	1	1	{'provided': 0.25, '?': 0.06, '______': 0.06, '': 0.05, '"': 0.03}	0	0.251953	0	1	context	context|target	0.52	TRUE	TRUE	TRUE	target	{'provided': 0.52, 'provide': 0.49}
Verbal & Grammatical Forms	verb_inf_Ved	followed is to follow as reduced is to	reduce	reduced	0.25	0	1	{'reduced': 0.25, 'reduce': 0.15, 'reduction': 0.07, '______': 0.02, '': 0.02}	1	0.149414	0.0976562	0.99999	context	context|target	0.52	TRUE	TRUE	TRUE	target	{'reduce': 0.52, 'reduced': 0.5}
Verbal & Grammatical Forms	verb_inf_Ving	continuing is to continue as spending is to	spend	spend	0.25	1	1	{'spend': 0.25, 'save': 0.07, 'continue': 0.06, 'spent': 0.06, 'be': 0.04}	0	0.253906	0	1	context	context|target	0.52	TRUE	TRUE	TRUE	target	{'spend': 0.52, 'spending': 0.49}
Verbal & Grammatical Forms	verb_inf_Ved	applied is to apply as replaced is to	replace	replace	0.25	1	1	{'replace': 0.25, 'replaced': 0.13, 'be': 0.05, 'replacing': 0.04, 'replacement': 0.03}	0	0.246094	0	1	context	context|target	0.52	TRUE	TRUE	TRUE	target	{'replace': 0.52, 'replaced': 0.51}
Verbal & Grammatical Forms	verb_Ving_Ved	improved is to improving as included is to	including	including	0.25	1	1	{'including': 0.25, '______': 0.07, 'excluding': 0.07, 'included': 0.06, '__': 0.04}	0	0.253906	0	1	context	context|target	0.52	TRUE	TRUE	TRUE	target	{'including': 0.52, 'included': 0.49}
Verbal & Grammatical Forms	verb_Ving_Ved	appeared is to appearing as published is to	publishing	published	0.25	0	1	{'published': 0.25, 'publishing': 0.21, 'publish': 0.08, 'publication': 0.07, 'being': 0.05}	1	0.210938	0.0429688	0.99999	context	context|target	0.52	TRUE	TRUE	TRUE	target	{'publishing': 0.52, 'published': 0.48}
Verbal & Grammatical Forms	verb_Ving_Ved	allowed is to allowing as existed is to	existing	existing	0.25	1	1	{'existing': 0.25, 'exist': 0.18, 'existence': 0.1, 'existed': 0.07, 'exists': 0.06}	0	0.251953	0	1	context	context|target	0.52	TRUE	TRUE	TRUE	target	{'existing': 0.52, 'existed': 0.51}
Morphological Modifiers	re+verb_reg	reemerge is to emerge as reinstall is to	install	emerge	0.24	0	1	{'emerge': 0.24, 'install': 0.19, 'reinstall': 0.1, 'uninstall': 0.03, 'rev': 0.03}	1	0.189453	0.0537109	0.99999	context	context|target	0.52	TRUE	TRUE	TRUE	target	{'install': 0.52, 'reinstall': 0.47}
Verbal & Grammatical Forms	verb_Ving_3pSg	learns is to learning as requires is to	requiring	requires	0.24	0	1	{'requires': 0.24, 'requirement': 0.21, 'requiring': 0.07, 'necessity': 0.05, 'require': 0.04}	2	0.0722656	0.164062	0.99998	context	context|target	0.52	TRUE	TRUE	TRUE	target	{'requiring': 0.52, 'requires': 0.5}
Verbal & Grammatical Forms	verb_Ving_3pSg	containing is to contains as following is to	follows	follow	0.24	0.5	1	{'follow': 0.24, 'follows': 0.2, '': 0.02, '?': 0.03}	1	0.202148	0.0410156	0.99999	context	context|target	0.52	TRUE	TRUE	TRUE	target	{'follows': 0.52, 'following': 0.49}
Verbal & Grammatical Forms	noun_plural_irreg	duties is to duty as libraries is to	library	books	0.24	0	1	{'books': 0.24, 'library': 0.09, 'read': 0.04, 'libraries': 0.03, 'book': 0.03}	1	0.0942383	0.146973	0.99999	context	context|target	0.52	TRUE	TRUE	TRUE	target	{'library': 0.52, 'libraries': 0.49}
Verbal & Grammatical Forms	verb_inf_Ved	enjoyed is to enjoy as reduced is to	reduce	reduce	0.24	1	1	{'reduce': 0.24, 'enjoy': 0.13, 'reduced': 0.12, 'enjoyed': 0.08, 'reduction': 0.03}	0	0.241211	0	1	context	context|target	0.52	TRUE	TRUE	TRUE	target	{'reduce': 0.52, 'reduced': 0.5}
Verbal & Grammatical Forms	verb_inf_Ved	develop is to developed as understand is to	understood	understood	0.24	1	1	{'understood': 0.24, '______': 0.08, '': 0.06, '__': 0.05, '?': 0.04}	0	0.236328	0	1	context	context|target	0.52	TRUE	TRUE	TRUE	target	{'understood': 0.52, 'understand': 0.48}
Morphological Modifiers	adj_superlative	healthiest is to healthy as tastiest is to	tasty	tasty	0.23	1	1	{'tasty': 0.23, 'delicious': 0.06, '______': 0.06, 'tast': 0.05, '"': 0.04}	0	0.234375	0	1	context	context|target	0.52	TRUE	TRUE	TRUE	target	{'tasty': 0.52, 'tastiest': 0.46}
Morphological Modifiers	adj_comparative	happy is to happier as strong is to	stronger	stronger	0.23	1	1	{'stronger': 0.23, '______': 0.12, '__': 0.07, 'what': 0.04, 'A': 0.03}	0	0.228516	0	1	context	context|target	0.52	TRUE	TRUE	TRUE	target	{'stronger': 0.52, 'strong': 0.5}
Morphological Modifiers	verb+ment_irreg	embarrassment is to embarrass as enhancement is to	enhance	enhance	0.23	1	1	{'enhance': 0.23, '______': 0.1, '__': 0.06, '': 0.03}	0	0.230469	0	1	context	context|target	0.52	TRUE	TRUE	TRUE	target	{'enhance': 0.52, 'enhancement': 0.51}
Verbal & Grammatical Forms	verb_Ving_3pSg	believes is to believing as receives is to	receiving	receives	0.23	0	1	{'receives': 0.23, 'reception': 0.08, 'receiving': 0.08, 'receive': 0.06, 'received': 0.04}	1	0.0810547	0.15332	0.99999	context	context|target	0.52	TRUE	TRUE	TRUE	target	{'receiving': 0.52, 'receives': 0.49}
Verbal & Grammatical Forms	verb_inf_3pSg	believe is to believes as include is to	includes	includes	0.23	1	1	{'includes': 0.23, 'excludes': 0.08, 'include': 0.03, '__': 0.03, 'contains': 0.03}	0	0.228516	0	1	context	context|target	0.52	TRUE	TRUE	TRUE	target	{'includes': 0.52, 'include': 0.52}
Verbal & Grammatical Forms	verb_inf_3pSg	avoid is to avoids as tell is to	tells	tells	0.23	1	1	{'tells': 0.23, 'tell': 0.07, '': 0.04, '______': 0.03}	0	0.231445	0	1	context	context|target	0.52	TRUE	TRUE	TRUE	target	{'tells': 0.52, 'tell': 0.47}
Verbal & Grammatical Forms	verb_inf_3pSg	describe is to describes as include is to	includes	includes	0.23	1	1	{'includes': 0.23, 'include': 0.07, '______': 0.04, '__': 0.03, '': 0.03}	0	0.230469	0	1	context	context|target	0.52	TRUE	TRUE	TRUE	target	{'includes': 0.52, 'include': 0.52}
Verbal & Grammatical Forms	verb_inf_3pSg	achieve is to achieves as describe is to	describes	describes	0.23	1	1	{'describes': 0.23, 'describe': 0.09, '': 0.05, '__': 0.05}	0	0.227539	0	1	context	context|target	0.52	TRUE	TRUE	TRUE	target	{'describes': 0.52, 'describe': 0.48}
Verbal & Grammatical Forms	noun_plural_reg	gods is to god as years is to	year	day	0.23	0	1	{'day': 0.23, 'a': 0.15, 'days': 0.08, 'year': 0.05, 'time': 0.04}	3	0.0458984	0.1875	0.99997	context	context|target	0.52	TRUE	TRUE	TRUE	target	{'year': 0.52, 'years': 0.48}
Verbal & Grammatical Forms	verb_3pSg_Ved	appeared is to appears as created is to	creates	create	0.23	0.5	1	{'create': 0.23, 'created': 0.17, 'be': 0.12, 'creates': 0.05, 'appear': 0.03}	3	0.0507812	0.176758	0.99997	context	context|target	0.52	TRUE	TRUE	TRUE	target	{'creates': 0.52, 'created': 0.49}
Verbal & Grammatical Forms	verb_inf_Ved	provided is to provide as replaced is to	replace	replace	0.23	1	1	{'replace': 0.23, 'provide': 0.07, 'take': 0.03, 'repair': 0.03, 'receive': 0.03}	0	0.231445	0	1	context	context|target	0.52	TRUE	TRUE	TRUE	target	{'replace': 0.52, 'replaced': 0.48}
Verbal & Grammatical Forms	verb_inf_Ving	continue is to continuing as reduce is to	reducing	reducing	0.23	1	1	{'reducing': 0.23, 'reduction': 0.07, '______': 0.07, '__': 0.07, '': 0.04}	0	0.229492	0	1	context	context|target	0.52	TRUE	TRUE	TRUE	target	{'reducing': 0.52, 'reduce': 0.47}
Verbal & Grammatical Forms	verb_inf_Ving	enjoy is to enjoying as tell is to	telling	telling	0.23	1	1	{'telling': 0.23, '______': 0.07, '': 0.04, '__': 0.04, '____': 0.03}	0	0.225586	0	1	context	context|target	0.52	TRUE	TRUE	TRUE	target	{'telling': 0.52, 'tell': 0.47}
Verbal & Grammatical Forms	verb_Ving_Ved	created is to creating as published is to	publishing	published	0.23	0	1	{'published': 0.23, 'publish': 0.11, 'publishing': 0.08, 'publication': 0.07, '': 0.03}	2	0.078125	0.148438	0.99998	context	context|target	0.52	TRUE	TRUE	TRUE	target	{'publishing': 0.52, 'published': 0.49}
Verbal & Grammatical Forms	verb_Ving_Ved	agreed is to agreeing as heard is to	hearing	heard	0.23	0	1	{'heard': 0.23, 'hearing': 0.14, '______': 0.08, '_____': 0.04, '__': 0.04}	1	0.142578	0.0917969	0.99999	context	context|target	0.52	TRUE	TRUE	TRUE	target	{'hearing': 0.52, 'heard': 0.5}
Morphological Modifiers	verb+able_reg	deliverable is to deliver as downloadable is to	download	download	0.22	1	1	{'download': 0.22, 'deliver': 0.13, 'be': 0.04, 'distribute': 0.03, 'downloadable': 0.02}	0	0.217773	0	1	context	context|target	0.52	TRUE	TRUE	TRUE	target	{'download': 0.52, 'downloadable': 0.48}
Morphological Modifiers	verb+er_irreg	determiner is to determine as loser is to	lose	win	0.22	0	1	{'win': 0.22, 'loser': 0.13, 'lose': 0.13, 'determine': 0.08, 'winner': 0.07}	1	0.125977	0.0957031	0.99999	context	context|target	0.52	TRUE	TRUE	TRUE	target	{'lose': 0.52, 'loser': 0.51}
Verbal & Grammatical Forms	verb_Ving_3pSg	refers is to referring as requires is to	requiring	requires	0.22	0	1	{'requires': 0.22, 'requiring': 0.17, 'require': 0.15, 'requirement': 0.07, 'required': 0.06}	1	0.167969	0.0478516	0.99999	context	context|target	0.52	TRUE	TRUE	TRUE	target	{'requiring': 0.52, 'requires': 0.51}
Verbal & Grammatical Forms	verb_Ving_3pSg	appears is to appearing as involves is to	involving	involved	0.22	0	1	{'involved': 0.22, 'involves': 0.22, 'involving': 0.11, 'involvement': 0.05, 'involve': 0.03}	2	0.108887	0.106934	0.99998	context	context|target	0.52	TRUE	TRUE	TRUE	target	{'involving': 0.52, 'involves': 0.5}
Verbal & Grammatical Forms	verb_inf_3pSg	describe is to describes as send is to	sends	sends	0.22	1	1	{'sends': 0.22, 'send': 0.06, '': 0.04, '______': 0.04, '__': 0.03}	0	0.22168	0	1	context	context|target	0.52	TRUE	TRUE	TRUE	target	{'sends': 0.52, 'send': 0.5}
Verbal & Grammatical Forms	verb_inf_3pSg	follows is to follow as provides is to	provide	provides	0.22	0	1	{'provides': 0.22, 'provider': 0.06, 'provide': 0.05, 'follows': 0.04, '': 0.03}	2	0.0490723	0.171631	0.99998	context	context|target	0.52	TRUE	TRUE	TRUE	target	{'provide': 0.52, 'provides': 0.49}
Verbal & Grammatical Forms	verb_3pSg_Ved	became is to becomes as established is to	establishes	establishes	0.22	1	1	{'establishes': 0.22, 'establish': 0.15, 'establishing': 0.13, 'established': 0.1, 'establishment': 0.03}	0	0.22168	0	1	context	context|target	0.52	TRUE	TRUE	TRUE	target	{'establishes': 0.52, 'established': 0.47}
Factual Knowledge	country_capital	Belgium is to Brussels as Pakistan is to	islamabad	Islamabad	0.21	1	1	{'Islamabad': 0.21, 'Lahore': 0.14, '______': 0.14, 'Karachi': 0.13, '__': 0.05}	0	0.210938	0	1	context	context|target	0.52	TRUE	TRUE	TRUE	target	{'islamabad': 0.52, 'pakistan': 0.5}
Factual Knowledge	capital_world	Belgium is to Brussels as Pakistan is to	islamabad	Islamabad	0.21	1	1	{'Islamabad': 0.21, 'Lahore': 0.14, '______': 0.14, 'Karachi': 0.13, '__': 0.05}	0	0.210938	0	1	context	context|target	0.52	TRUE	TRUE	TRUE	target	{'islamabad': 0.52, 'pakistan': 0.5}
Morphological Modifiers	verb+ment_irreg	engage is to engagement as impair is to	impairment	______	0.21	0	1	{'______': 0.21, 'impairment': 0.14, '____': 0.06, '__': 0.04, '_____': 0.04}	1	0.137695	0.0761719	0.99999	context	context|target	0.52	TRUE	TRUE	TRUE	target	{'impairment': 0.52, 'impair': 0.48}
Morphological Modifiers	verb+able_reg	achieve is to achieveable as rely is to	reliable	reliable	0.21	1	1	{'reliable': 0.21, 'rely': 0.08, 'reli': 0.06, '': 0.04}	0	0.208984	0	1	context	context|target	0.52	TRUE	TRUE	TRUE	target	{'reliable': 0.52, 'rely': 0.51}
Verbal & Grammatical Forms	verb_Ving_3pSg	improving is to improves as requiring is to	requires	requires	0.21	1	1	{'requires': 0.21, '': 0.06, '______': 0.06, 'require': 0.05, '__': 0.04}	0	0.206055	0	1	context	context|target	0.52	TRUE	TRUE	TRUE	target	{'requires': 0.52, 'requiring': 0.51}
Verbal & Grammatical Forms	verb_inf_Ving	add is to adding as protect is to	protecting	protecting	0.21	1	1	{'protecting': 0.21, '______': 0.05, 'shielding': 0.04, '__': 0.03, '_____': 0.03}	0	0.205078	0	1	context	context|target	0.52	TRUE	TRUE	TRUE	target	{'protecting': 0.52, 'protect': 0.49}
Verbal & Grammatical Forms	verb_inf_3pSg	achieves is to achieve as promotes is to	promote	promote	0.21	1	1	{'promote': 0.21, 'promotes': 0.11, 'achieve': 0.02, 'achieves': 0.01, '': 0.01}	0	0.207031	0	1	context	context|target	0.52	TRUE	TRUE	TRUE	target	{'promote': 0.52, 'promotes': 0.48}
Verbal & Grammatical Forms	verb_inf_3pSg	provide is to provides as refer is to	refers	refers	0.21	1	1	{'refers': 0.21, '': 0.03, '?': 0.06}	0	0.206055	0	1	context	context|target	0.52	TRUE	TRUE	TRUE	target	{'refers': 0.52, 'refer': 0.48}
Verbal & Grammatical Forms	verb_inf_3pSg	prevents is to prevent as protects is to	protect	protect	0.21	1	1	{'protect': 0.21, 'protects': 0.06, '______': 0.06, '__': 0.05, '_____': 0.04}	0	0.211914	0	1	context	context|target	0.52	TRUE	TRUE	TRUE	target	{'protect': 0.52, 'protects': 0.5}
Verbal & Grammatical Forms	noun_plural_irreg	economies is to economy as libraries is to	library	library	0.21	1	1	{'library': 0.21, 'literacy': 0.07, 'literature': 0.07, '______': 0.05, 'books': 0.05}	0	0.211914	0	1	context	context|target	0.52	TRUE	TRUE	TRUE	target	{'library': 0.52, 'libraries': 0.48}
Verbal & Grammatical Forms	verb_inf_Ving	enjoying is to enjoy as remaining is to	remain	be	0.21	0	1	{'be': 0.21, 'remain': 0.16, 'endure': 0.11, 'stay': 0.04, 'continue': 0.04}	1	0.161133	0.0458984	0.99999	context	context|target	0.52	TRUE	TRUE	TRUE	target	{'remain': 0.52, 'remaining': 0.48}
Morphological Modifiers	adj_superlative	cruelest is to cruel as nastiest is to	nasty	nice	0.2	0	1	{'nice': 0.2, 'nasty': 0.13, 'kind': 0.05, 'mean': 0.05, '______': 0.04}	1	0.130859	0.0722656	0.99999	context	context|target	0.52	TRUE	TRUE	TRUE	target	{'nasty': 0.52, 'nastiest': 0.49}
Morphological Modifiers	verb+ment_irreg	equip is to equipment as punish is to	punishment	punishment	0.2	1	1	{'punishment': 0.2, '': 0.05, '______': 0.05, '____': 0.04}	0	0.198242	0	1	context	context|target	0.52	TRUE	TRUE	TRUE	target	{'punishment': 0.52, 'punish': 0.5}
Verbal & Grammatical Forms	verb_Ving_3pSg	becomes is to becoming as involves is to	involving	involvement	0.2	0	1	{'involvement': 0.2, 'involving': 0.17, 'involves': 0.13, 'involve': 0.06, 'involved': 0.04}	1	0.172852	0.0234375	0.99999	context	context|target	0.52	TRUE	TRUE	TRUE	target	{'involving': 0.52, 'involves': 0.5}
Verbal & Grammatical Forms	verb_inf_3pSg	avoids is to avoid as considers is to	consider	consider	0.2	1	1	{'consider': 0.2, 'avoid': 0.07, 'considers': 0.04, 'think': 0.03, 'be': 0.02}	0	0.202148	0	1	context	context|target	0.52	TRUE	TRUE	TRUE	target	{'consider': 0.52, 'considers': 0.49}
Verbal & Grammatical Forms	verb_inf_3pSg	prevents is to prevent as reduces is to	reduce	reduces	0.2	0	1	{'reduces': 0.2, 'increases': 0.07, 'reduction': 0.06, 'reduce': 0.05, 'reduced': 0.04}	3	0.0541992	0.147949	0.99997	context	context|target	0.52	TRUE	TRUE	TRUE	target	{'reduce': 0.52, 'reduces': 0.48}
Verbal & Grammatical Forms	verb_Ving_Ved	heard is to hearing as taught is to	teaching	teaching	0.2	1	1	{'teaching': 0.2, 'learning': 0.13, '______': 0.1, 'taught': 0.07, '__': 0.05}	0	0.202148	0	1	context	context|target	0.52	TRUE	TRUE	TRUE	target	{'teaching': 0.52, 'taught': 0.48}
Verbal & Grammatical Forms	verb_Ving_Ved	introduced is to introducing as received is to	receiving	received	0.2	0	1	{'received': 0.2, 'receiving': 0.06, 'receive': 0.06, 'reception': 0.03, 'introduced': 0.02}	2	0.0639648	0.132324	0.99998	context	context|target	0.52	TRUE	TRUE	TRUE	target	{'receiving': 0.52, 'received': 0.48}
Verbal & Grammatical Forms	verb_3pSg_Ved	became is to becomes as intended is to	intends	intends	0.2	1	1	{'intends': 0.2, 'intend': 0.19, 'intended': 0.16, 'intention': 0.09, 'intending': 0.09}	0	0.200195	0	1	context	context|target	0.52	TRUE	TRUE	TRUE	target	{'intends': 0.52, 'intended': 0.48}
Morphological Modifiers	verb+able_reg	downloadable is to download as reliable is to	rely	trust	0.19	0	1	{'trust': 0.19, 'rely': 0.1, 'be': 0.04, 'download': 0.03, 'believe': 0.03}	1	0.103027	0.0893555	0.99999	context	context|target	0.52	TRUE	TRUE	TRUE	target	{'rely': 0.52, 'reliable': 0.51}
Morphological Modifiers	adj_comparative	strong is to stronger as weak is to	weaker	weak	0.19	0.5	1	{'weak': 0.19, 'weaker': 0.08, '': 0.06, '______': 0.05, ':': 0.04}	1	0.0834961	0.104004	0.99999	context	context|target	0.52	TRUE	TRUE	TRUE	target	{'weaker': 0.52, 'weak': 0.47}
Morphological Modifiers	comparative	strong is to stronger as weak is to	weaker	weak	0.19	0.5	1	{'weak': 0.19, 'weaker': 0.08, '': 0.06, '______': 0.05, ':': 0.04}	1	0.0834961	0.104004	0.99999	context	context|target	0.52	TRUE	TRUE	TRUE	target	{'weaker': 0.52, 'weak': 0.47}
Verbal & Grammatical Forms	verb_Ving_3pSg	becoming is to becomes as involving is to	involves	involved	0.19	0	1	{'involved': 0.19, 'involve': 0.18, 'involves': 0.18, 'involvement': 0.06, 'invol': 0.04}	1	0.177734	0.0107422	0.99999	context	context|target	0.52	TRUE	TRUE	TRUE	target	{'involves': 0.52, 'involving': 0.5}
Verbal & Grammatical Forms	verb_Ving_3pSg	applies is to applying as sits is to	sitting	sits	0.19	0	1	{'sits': 0.19, 'sitting': 0.11, 'sit': 0.06, 'sat': 0.02, 's': 0.02}	1	0.112305	0.0732422	0.99999	context	context|target	0.52	TRUE	TRUE	TRUE	target	{'sitting': 0.52, 'sits': 0.51}
Verbal & Grammatical Forms	verb_inf_3pSg	agree is to agrees as suggest is to	suggests		0.19	0	1	{'': 0.11, '?': 0.11, ':': 0.06, 'suggests': 0.04}	4	0.0424805	0.147949	0.99996	context	context|target	0.52	TRUE	TRUE	TRUE	target	{'suggests': 0.52, 'suggest': 0.49}
Verbal & Grammatical Forms	verb_inf_3pSg	allows is to allow as provides is to	provide	provide	0.19	1	1	{'provide': 0.19, 'allow': 0.08, 'require': 0.04, 'provides': 0.03, 'permit': 0.03}	0	0.191406	0	1	context	context|target	0.52	TRUE	TRUE	TRUE	target	{'provide': 0.52, 'provides': 0.49}
Verbal & Grammatical Forms	verb_inf_3pSg	allows is to allow as continues is to	continue	allow	0.19	0	1	{'allow': 0.19, 'continue': 0.13, 'permit': 0.03, 'be': 0.03, 'go': 0.02}	1	0.132812	0.0605469	0.99999	context	context|target	0.52	TRUE	TRUE	TRUE	target	{'continue': 0.52, 'continues': 0.5}
Verbal & Grammatical Forms	verb_inf_3pSg	involve is to involves as remain is to	remains		0.19	0	1	{'': 0.05, '?': 0.08, 'remains': 0.1}	2	0.101562	0.0888672	0.99998	context	context|target	0.52	TRUE	TRUE	TRUE	target	{'remains': 0.52, 'remain': 0.51}
Verbal & Grammatical Forms	verb_inf_3pSg	achieve is to achieves as contain is to	contains	contains	0.19	1	1	{'contains': 0.19, '': 0.04, '?': 0.04, '__': 0.03}	0	0.189453	0	1	context	context|target	0.52	TRUE	TRUE	TRUE	target	{'contains': 0.52, 'contain': 0.49}
Verbal & Grammatical Forms	verb_inf_Ved	decide is to decided as receive is to	received		0.19	0	1	{'': 0.06, 'received': 0.06, '?': 0.06, ':': 0.04}	2	0.0603027	0.125244	0.99998	context	context|target	0.52	TRUE	TRUE	TRUE	target	{'received': 0.52, 'receive': 0.47}
Verbal & Grammatical Forms	verb_inf_Ving	encouraging is to encourage as teaching is to	teach	learn	0.19	0	1	{'learn': 0.19, 'educate': 0.12, 'teach': 0.09, 'instruct': 0.06, 'train': 0.03}	2	0.0878906	0.0986328	0.99998	context	context|target	0.52	TRUE	TRUE	TRUE	target	{'teach': 0.52, 'teaching': 0.47}
Verbal & Grammatical Forms	verb_inf_Ved	apply is to applied as receive is to	received	received	0.19	1	1	{'received': 0.19, '?': 0.03, '': 0.05, '______': 0.03}	0	0.19043	0	1	context	context|target	0.52	TRUE	TRUE	TRUE	target	{'received': 0.52, 'receive': 0.49}
Verbal & Grammatical Forms	verb_3pSg_Ved	creates is to created as describes is to	described	described	0.19	1	1	{'described': 0.19, '______': 0.1, 'describes': 0.09, '__': 0.05, '_____': 0.05}	0	0.192383	0	1	context	context|target	0.52	TRUE	TRUE	TRUE	target	{'described': 0.52, 'describes': 0.49}
Factual Knowledge	capital_world	Damascus is to Syria as Khartoum is to	sudan	what	0.18	0	1	{'what': 0.18, 'Sudan': 0.13, '__': 0.1, '______': 0.08, '___': 0.05}	1	0.126953	0.0576172	0.99999	context	context|target	0.52	TRUE	TRUE	TRUE	target	{'sudan': 0.52, 'khartoum': 0.48}
Morphological Modifiers	verb+able_reg	explain is to explainable as rely is to	reliable	reliable	0.18	1	1	{'reliable': 0.18, '______': 0.1, 'reliant': 0.04, '?': 0.04, '__': 0.03}	0	0.181641	0	1	context	context|target	0.52	TRUE	TRUE	TRUE	target	{'reliable': 0.52, 'rely': 0.5}
Morphological Modifiers	verb+ment_irreg	adjust is to adjustment as agree is to	agreement	agreement	0.18	1	1	{'agreement': 0.18, '': 0.05, '______': 0.04, '"': 0.02}	0	0.179688	0	1	context	context|target	0.52	TRUE	TRUE	TRUE	target	{'agreement': 0.52, 'agree': 0.49}
Morphological Modifiers	noun+less_reg	heartless is to heart as speechless is to	speech	mouth	0.18	0	1	{'mouth': 0.18, 'speech': 0.13, '____': 0.07, '______': 0.04, '___': 0.04}	1	0.128906	0.0478516	0.99999	context	context|target	0.52	TRUE	TRUE	TRUE	target	{'speech': 0.52, 'speechless': 0.5}
Morphological Modifiers	verb+er_irreg	recommender is to recommend as teacher is to	teach	student	0.18	0	1	{'student': 0.18, 'teach': 0.05, 'recommend': 0.05, '': 0.04, 'educate': 0.02}	1	0.0480957	0.130615	0.99999	context	context|target	0.52	TRUE	TRUE	TRUE	target	{'teach': 0.52, 'teacher': 0.5}
Verbal & Grammatical Forms	verb_inf_Ving	add is to adding as consider is to	considering	considering	0.18	1	1	{'considering': 0.18, 'thinking': 0.15, '': 0.02, 'ponder': 0.02}	0	0.181641	0	1	context	context|target	0.52	TRUE	TRUE	TRUE	target	{'considering': 0.52, 'consider': 0.49}
Verbal & Grammatical Forms	verb_Ving_3pSg	applying is to applies as hearing is to	hears	hears	0.18	1	1	{'hears': 0.18, 'hear': 0.11, 'listens': 0.1, 'listen': 0.08, 'listening': 0.04}	0	0.178711	0	1	context	context|target	0.52	TRUE	TRUE	TRUE	target	{'hears': 0.52, 'hearing': 0.48}
Verbal & Grammatical Forms	verb_Ving_3pSg	developing is to develops as reducing is to	reduces	reduces	0.18	1	1	{'reduces': 0.18, 'reduce': 0.12, '______': 0.05, '': 0.04, '__': 0.03}	0	0.182617	0	1	context	context|target	0.52	TRUE	TRUE	TRUE	target	{'reduces': 0.52, 'reducing': 0.47}
Verbal & Grammatical Forms	plural	women is to woman as computers is to	computer	computer	0.18	1	1	{'computer': 0.18, 'computers': 0.05, '__': 0.05, '______': 0.04, 'men': 0.03}	0	0.182617	0	1	context	context|target	0.52	TRUE	TRUE	TRUE	target	{'computer': 0.52, 'computers': 0.47}
Verbal & Grammatical Forms	past_tense	spent is to spending as took is to	taking	taking	0.18	1	1	{'taking': 0.18, '______': 0.08, '____': 0.07, 'taken': 0.06, 'giving': 0.05}	0	0.177734	0	1	context	context|target	0.52	TRUE	TRUE	TRUE	target	{'taking': 0.52, 'took': 0.48}
Verbal & Grammatical Forms	verb_inf_3pSg	contain is to contains as suggest is to	suggests	suggests	0.18	1	1	{'suggests': 0.18, '': 0.06, '?': 0.04, '__': 0.03}	0	0.182617	0	1	context	context|target	0.52	TRUE	TRUE	TRUE	target	{'suggests': 0.52, 'suggest': 0.49}
Verbal & Grammatical Forms	verb_inf_3pSg	achieve is to achieves as suggest is to	suggests	suggest	0.18	0.5	1	{'suggest': 0.18, '': 0.05, 'suggests': 0.05, '__': 0.04}	2	0.0517578	0.128906	0.99998	context	context|target	0.52	TRUE	TRUE	TRUE	target	{'suggests': 0.52, 'suggest': 0.49}
Verbal & Grammatical Forms	verb_inf_3pSg	involve is to involves as maintain is to	maintains		0.18	0	1	{'': 0.04, '?': 0.11, 'maintains': 0.08}	3	0.0810547	0.101562	0.99997	context	context|target	0.52	TRUE	TRUE	TRUE	target	{'maintains': 0.52, 'maintain': 0.48}
Verbal & Grammatical Forms	verb_inf_3pSg	learn is to learns as send is to	sends	sends	0.18	1	1	{'sends': 0.18, '______': 0.07, '': 0.07, '_____': 0.05, '__': 0.04}	0	0.179688	0	1	context	context|target	0.52	TRUE	TRUE	TRUE	target	{'sends': 0.52, 'send': 0.51}
Verbal & Grammatical Forms	verb_inf_3pSg	maintains is to maintain as provides is to	provide	provides	0.18	0	1	{'provides': 0.18, 'provide': 0.1, 'provided': 0.04, 'maintains': 0.04, 'maintain': 0.04}	1	0.0986328	0.0859375	0.99999	context	context|target	0.52	TRUE	TRUE	TRUE	target	{'provide': 0.52, 'provides': 0.49}
Verbal & Grammatical Forms	verb_inf_3pSg	develop is to develops as represent is to	represents		0.18	0	1	{'': 0.04, 'represents': 0.09, '?': 0.08}	1	0.0888672	0.0878906	0.99999	context	context|target	0.52	TRUE	TRUE	TRUE	target	{'represents': 0.52, 'represent': 0.49}
Verbal & Grammatical Forms	verb_inf_Ved	add is to added as reduce is to	reduced	reduced	0.18	1	1	{'reduced': 0.18, 'subtract': 0.08, 'removed': 0.06, '?': 0.04, '': 0.04}	0	0.175781	0	1	context	context|target	0.52	TRUE	TRUE	TRUE	target	{'reduced': 0.52, 'reduce': 0.49}
Morphological Modifiers	verb+ment_irreg	advertisement is to advertise as establishment is to	establish	establish	0.17	1	1	{'establish': 0.17, 'advertise': 0.06, '': 0.02, 'build': 0.01}	0	0.169922	0	1	context	context|target	0.52	TRUE	TRUE	TRUE	target	{'establish': 0.52, 'establishment': 0.47}
Morphological Modifiers	verb+er_irreg	loser is to lose as receiver is to	receive	win	0.17	0	1	{'win': 0.17, 'receive': 0.11, 'catch': 0.09, 'gain': 0.05, '': 0.04}	1	0.11084	0.0600586	0.99999	context	context|target	0.52	TRUE	TRUE	TRUE	target	{'receive': 0.52, 'receiver': 0.46}
Verbal & Grammatical Forms	verb_inf_Ving	ask is to asking as exist is to	existing	existence	0.17	0	1	{'existence': 0.17, 'being': 0.06, 'existing': 0.04, 'essence': 0.03, '______': 0.03}	2	0.0380859	0.132812	0.99998	context	context|target	0.52	TRUE	TRUE	TRUE	target	{'existing': 0.52, 'exist': 0.48}
Verbal & Grammatical Forms	verb_inf_3pSg	avoid is to avoids as learn is to	learns	learns	0.17	1	1	{'learns': 0.17, 'learn': 0.13, '': 0.05, '______': 0.05, 'learning': 0.04}	0	0.171875	0	1	context	context|target	0.52	TRUE	TRUE	TRUE	target	{'learns': 0.52, 'learn': 0.48}
Verbal & Grammatical Forms	verb_inf_3pSg	develop is to develops as promote is to	promotes		0.17	0	1	{'': 0.07, '?': 0.08, 'promotes': 0.06, '______': 0.06}	3	0.0649414	0.100098	0.99997	context	context|target	0.52	TRUE	TRUE	TRUE	target	{'promotes': 0.52, 'promote': 0.48}
Verbal & Grammatical Forms	verb_inf_3pSg	follows is to follow as promotes is to	promote	promotes	0.17	0	1	{'promotes': 0.17, 'promote': 0.06, '': 0.02, 'follows': 0.03}	1	0.0568848	0.108154	0.99999	context	context|target	0.52	TRUE	TRUE	TRUE	target	{'promote': 0.52, 'promotes': 0.48}
Verbal & Grammatical Forms	verb_3pSg_Ved	allowed is to allows as described is to	describes	describes	0.17	1	1	{'describes': 0.17, 'described': 0.12, 'allows': 0.05, 'allowed': 0.04, 'describe': 0.03}	0	0.169922	0	1	context	context|target	0.52	TRUE	TRUE	TRUE	target	{'describes': 0.52, 'described': 0.48}
Verbal & Grammatical Forms	verb_inf_Ving	learn is to learning as protect is to	protecting	protection	0.17	0	1	{'protection': 0.17, 'protecting': 0.1, 'safety': 0.09, '__': 0.04, '______': 0.03}	1	0.097168	0.0727539	0.99999	context	context|target	0.52	TRUE	TRUE	TRUE	target	{'protecting': 0.52, 'protect': 0.5}
Verbal & Grammatical Forms	verb_Ving_Ved	existed is to existing as improved is to	improving	better	0.17	0	1	{'better': 0.17, 'good': 0.09, 'perfect': 0.07, 'improving': 0.06, 'improvement': 0.05}	3	0.0593262	0.112549	0.99997	context	context|target	0.52	TRUE	TRUE	TRUE	target	{'improving': 0.52, 'improved': 0.48}
Morphological Modifiers	adj_superlative	cruelest is to cruel as fiercest is to	fierce	fierce	0.16	1	1	{'fierce': 0.16, '______': 0.05, '': 0.04, '"': 0.03, 'furious': 0.03}	0	0.157227	0	1	context	context|target	0.52	TRUE	TRUE	TRUE	target	{'fierce': 0.52, 'fiercest': 0.49}
Morphological Modifiers	verb+able_reg	explain is to explainable as imagine is to	imaginable	imaginable	0.16	1	1	{'imaginable': 0.16, '______': 0.08, '__': 0.06, 'imaginary': 0.04, 'imagine': 0.03}	0	0.160156	0	1	context	context|target	0.52	TRUE	TRUE	TRUE	target	{'imaginable': 0.52, 'imagine': 0.49}
Morphological Modifiers	adj+ly_reg	interestingly is to interesting as seriously is to	serious	seriously	0.16	0	1	{'seriously': 0.16, '______': 0.07, '_____': 0.04, '': 0.04, 'serious': 0.03}	4	0.0314941	0.128662	0.99996	context	context|target	0.52	TRUE	TRUE	TRUE	target	{'serious': 0.52, 'seriously': 0.51}
Morphological Modifiers	verb+er_irreg	follower is to follow as teacher is to	teach	teach	0.16	1	1	{'teach': 0.16, 'leader': 0.1, 'teacher': 0.07, 'student': 0.06, '______': 0.04}	0	0.15918	0	1	context	context|target	0.52	TRUE	TRUE	TRUE	target	{'teach': 0.52, 'teacher': 0.49}
Verbal & Grammatical Forms	verb_Ving_3pSg	relating is to relates as requiring is to	requires	requires	0.16	1	1	{'requires': 0.16, '': 0.03, '?': 0.04}	0	0.161133	0	1	context	context|target	0.52	TRUE	TRUE	TRUE	target	{'requires': 0.52, 'requiring': 0.51}
Verbal & Grammatical Forms	verb_Ving_3pSg	involving is to involves as teaching is to	teaches	teach	0.16	0.5	1	{'teach': 0.16, 'teaches': 0.13, '': 0.05, '______': 0.03, '__': 0.03}	1	0.132812	0.0273438	0.99999	context	context|target	0.52	TRUE	TRUE	TRUE	target	{'teaches': 0.52, 'teaching': 0.49}
Verbal & Grammatical Forms	verb_inf_Ving	asking is to ask as protecting is to	protect	protect	0.16	1	1	{'protect': 0.16, 'save': 0.04, 'guard': 0.03, '__': 0.03, 'defend': 0.02}	0	0.160156	0	1	context	context|target	0.52	TRUE	TRUE	TRUE	target	{'protect': 0.52, 'protecting': 0.49}
Verbal & Grammatical Forms	verb_inf_Ving	believe is to believing as enjoy is to	enjoying	enjoyment	0.16	0	1	{'enjoyment': 0.16, 'enjoying': 0.15, '______': 0.06, 'pleasure': 0.05, 'enjoy': 0.04}	1	0.152344	0.00976562	0.99999	context	context|target	0.52	TRUE	TRUE	TRUE	target	{'enjoying': 0.52, 'enjoy': 0.5}
Verbal & Grammatical Forms	verb_inf_Ving	add is to adding as continue is to	continuing	continuing	0.16	1	1	{'continuing': 0.16, 'subtract': 0.05, 'jumping': 0.04, '__': 0.03, 'breaking': 0.03}	0	0.157227	0	1	context	context|target	0.52	TRUE	TRUE	TRUE	target	{'continuing': 0.52, 'continue': 0.5}
Verbal & Grammatical Forms	verb_Ving_3pSg	allows is to allowing as hears is to	hearing	hearing	0.16	1	1	{'hearing': 0.16, 'believing': 0.11, '______': 0.06, 'listening': 0.05, '': 0.04}	0	0.15625	0	1	context	context|target	0.52	TRUE	TRUE	TRUE	target	{'hearing': 0.52, 'hears': 0.47}
Verbal & Grammatical Forms	verb_Ving_3pSg	contains is to containing as requires is to	requiring	required	0.16	0	1	{'required': 0.16, 'requiring': 0.12, 'requirement': 0.08, 'requires': 0.04, '______': 0.04}	1	0.125	0.0361328	0.99999	context	context|target	0.52	TRUE	TRUE	TRUE	target	{'requiring': 0.52, 'requires': 0.5}
Verbal & Grammatical Forms	past_tense	spent is to spending as shrank is to	shrinking	what	0.16	0	1	{'what': 0.16, '______': 0.06, '__': 0.03, ':': 0.03, 'shrinking': 0.03}	4	0.0327148	0.122559	0.99996	context	context|target	0.52	TRUE	TRUE	TRUE	target	{'shrinking': 0.52, 'shrank': 0.48}
Verbal & Grammatical Forms	verb_inf_3pSg	contain is to contains as continue is to	continues	continues	0.16	1	1	{'continues': 0.16, '': 0.07, '__': 0.04, '______': 0.04}	0	0.162109	0	1	context	context|target	0.52	TRUE	TRUE	TRUE	target	{'continues': 0.52, 'continue': 0.49}
Verbal & Grammatical Forms	verb_inf_3pSg	achieve is to achieves as occur is to	occurs		0.16	0	1	{'': 0.06, 'occurs': 0.09, 'occur': 0.06, ':': 0.04}	1	0.0888672	0.0673828	0.99999	context	context|target	0.52	TRUE	TRUE	TRUE	target	{'occurs': 0.52, 'occur': 0.47}
Verbal & Grammatical Forms	verb_Ving_Ved	applying is to applied as creating is to	created	created	0.16	1	1	{'created': 0.16, 'creation': 0.08, '______': 0.06, '__': 0.05, 'creative': 0.05}	0	0.161133	0	1	context	context|target	0.52	TRUE	TRUE	TRUE	target	{'created': 0.52, 'creating': 0.5}
Factual Knowledge	country_capital	Greece is to Athens as Portugal is to	lisbon	Lisbon	0.15	1	1	{'Lisbon': 0.15, '______': 0.11, '__': 0.08, '_____': 0.05, '____': 0.03}	0	0.154297	0	1	context	context|target	0.52	TRUE	TRUE	TRUE	target	{'lisbon': 0.52, 'portugal': 0.48}
Morphological Modifiers	adj_superlative	healthiest is to healthy as subtlest is to	subtle	subtle	0.15	1	1	{'subtle': 0.15, '______': 0.08, '_____': 0.05, '': 0.03}	0	0.150391	0	1	context	context|target	0.52	TRUE	TRUE	TRUE	target	{'subtle': 0.52, 'subtlest': 0.48}
Morphological Modifiers	verb+ment_irreg	achieve is to achievement as assess is to	assessment	assessment	0.15	1	1	{'assessment': 0.15, '': 0.04, '______': 0.06, ':': 0.03}	0	0.148438	0	1	context	context|target	0.52	TRUE	TRUE	TRUE	target	{'assessment': 0.52, 'assess': 0.5}
Morphological Modifiers	verb+ment_irreg	enhance is to enhancement as invest is to	investment	investment	0.15	1	1	{'investment': 0.15, '______': 0.08, '?': 0.08, '__': 0.06, '': 0.05}	0	0.145508	0	1	context	context|target	0.52	TRUE	TRUE	TRUE	target	{'investment': 0.52, 'invest': 0.5}
Morphological Modifiers	adj+ly_reg	beautiful is to beautifully as serious is to	seriously	seriously	0.15	1	1	{'seriously': 0.15, '______': 0.07, '"': 0.03, '_____': 0.03, '__': 0.03}	0	0.152344	0	1	context	context|target	0.52	TRUE	TRUE	TRUE	target	{'seriously': 0.52, 'serious': 0.52}
Verbal & Grammatical Forms	verb_inf_3pSg	contain is to contains as remain is to	remains	remains	0.15	1	1	{'remains': 0.15, '': 0.07, '?': 0.03}	0	0.145508	0	1	context	context|target	0.52	TRUE	TRUE	TRUE	target	{'remains': 0.52, 'remain': 0.49}
Verbal & Grammatical Forms	verb_inf_3pSg	achieve is to achieves as represent is to	represents		0.15	0	1	{'': 0.06, 'represents': 0.07, 'represent': 0.04, '__': 0.04}	1	0.0683594	0.0771484	0.99999	context	context|target	0.52	TRUE	TRUE	TRUE	target	{'represents': 0.52, 'represent': 0.49}
Verbal & Grammatical Forms	verb_inf_3pSg	ask is to asks as include is to	includes	includes	0.15	1	1	{'includes': 0.15, 'include': 0.06, '?': 0.05, '__': 0.04, '': 0.04}	0	0.151367	0	1	context	context|target	0.52	TRUE	TRUE	TRUE	target	{'includes': 0.52, 'include': 0.52}
Verbal & Grammatical Forms	verb_inf_3pSg	protects is to protect as sends is to	send	receives	0.15	0	1	{'receives': 0.15, 'sends': 0.11, 'receive': 0.03, 'send': 0.03, 'protects': 0.03}	3	0.0291748	0.119263	0.99997	context	context|target	0.52	TRUE	TRUE	TRUE	target	{'send': 0.52, 'sends': 0.5}
Verbal & Grammatical Forms	verb_inf_3pSg	develops is to develop as promotes is to	promote	promote	0.15	1	1	{'promote': 0.15, 'promotes': 0.08, 'develop': 0.03, 'encourage': 0.02, 'advance': 0.02}	0	0.145508	0	1	context	context|target	0.52	TRUE	TRUE	TRUE	target	{'promote': 0.52, 'promotes': 0.48}
Verbal & Grammatical Forms	verb_inf_Ved	decide is to decided as understand is to	understood		0.15	0	1	{'': 0.06, 'understood': 0.07, 'understand': 0.06, 'understanding': 0.05}	1	0.0703125	0.078125	0.99999	context	context|target	0.52	TRUE	TRUE	TRUE	target	{'understood': 0.52, 'understand': 0.48}
Verbal & Grammatical Forms	verb_inf_Ving	improving is to improve as remembering is to	remember	forget	0.15	0	1	{'forget': 0.15, 'remember': 0.15, 'rec': 0.15, 'recall': 0.06, 'learn': 0.04}	1	0.152344	0	0.99999	context	context|target	0.52	TRUE	TRUE	TRUE	target	{'remember': 0.52, 'remembering': 0.46}
Verbal & Grammatical Forms	verb_Ving_Ved	expecting is to expected as involving is to	involved	involved	0.15	1	1	{'involved': 0.15, '______': 0.07, 'involve': 0.03, '_____': 0.03, '"': 0.03}	0	0.145508	0	1	context	context|target	0.52	TRUE	TRUE	TRUE	target	{'involved': 0.52, 'involving': 0.51}
Verbal & Grammatical Forms	verb_Ving_Ved	applying is to applied as deciding is to	decided	decision	0.15	0	1	{'decision': 0.15, 'decided': 0.12, '______': 0.08, '____': 0.05, '__': 0.04}	1	0.123535	0.0258789	0.99999	context	context|target	0.52	TRUE	TRUE	TRUE	target	{'decided': 0.52, 'deciding': 0.5}
Morphological Modifiers	adj_superlative	handiest is to handy as subtlest is to	subtle	subtle	0.14	1	1	{'subtle': 0.14, 'finest': 0.03, '______': 0.02, 'refined': 0.02, 'most': 0.02}	0	0.137695	0	1	context	context|target	0.52	TRUE	TRUE	TRUE	target	{'subtle': 0.52, 'subtlest': 0.48}
Morphological Modifiers	verb+ment_irreg	adjust is to adjustment as enhance is to	enhancement	enhancement	0.14	1	1	{'enhancement': 0.14, '?': 0.07, 'improvement': 0.06, '__': 0.05, '': 0.05}	0	0.143555	0	1	context	context|target	0.52	TRUE	TRUE	TRUE	target	{'enhancement': 0.52, 'enhance': 0.5}
Morphological Modifiers	adj+ness_reg	hotness is to hot as niceness is to	nice	nice	0.14	1	1	{'nice': 0.14, '______': 0.06, '____': 0.05, '"': 0.05, 'what': 0.04}	0	0.143555	0	1	context	context|target	0.52	TRUE	TRUE	TRUE	target	{'nice': 0.52, 'niceness': 0.47}
Morphological Modifiers	adj_comparative	dense is to denser as happy is to	happier	sad	0.14	0	1	{'sad': 0.14, '______': 0.07, 'happier': 0.05, 's': 0.05, '': 0.04}	2	0.0527344	0.0908203	0.99998	context	context|target	0.52	TRUE	TRUE	TRUE	target	{'happier': 0.52, 'happy': 0.48}
Morphological Modifiers	verb+ment_irreg	engage is to engagement as enhance is to	enhancement	______	0.14	0	1	{'______': 0.14, 'enhancement': 0.09, '__': 0.07, '': 0.03}	1	0.09375	0.0429688	0.99999	context	context|target	0.52	TRUE	TRUE	TRUE	target	{'enhancement': 0.52, 'enhance': 0.5}
Verbal & Grammatical Forms	verb_Ving_3pSg	learning is to learns as requiring is to	requires	requires	0.14	1	1	{'requires': 0.14, '______': 0.05, 'require': 0.04, '_____': 0.03, '__': 0.03}	0	0.135742	0	1	context	context|target	0.52	TRUE	TRUE	TRUE	target	{'requires': 0.52, 'requiring': 0.5}
Verbal & Grammatical Forms	verb_inf_Ving	attend is to attending as maintain is to	maintaining	maintaining	0.14	1	1	{'maintaining': 0.14, '': 0.07, '______': 0.05, 'maintenance': 0.04, '__': 0.04}	0	0.141602	0	1	context	context|target	0.52	TRUE	TRUE	TRUE	target	{'maintaining': 0.52, 'maintain': 0.49}
Verbal & Grammatical Forms	verb_inf_Ving	ask is to asking as expect is to	expecting	expecting	0.14	1	1	{'expecting': 0.14, '': 0.03, '______': 0.04, 'expect': 0.03}	0	0.139648	0	1	context	context|target	0.52	TRUE	TRUE	TRUE	target	{'expecting': 0.52, 'expect': 0.49}
Verbal & Grammatical Forms	verb_inf_Ving	asking is to ask as enjoying is to	enjoy	be	0.14	0	1	{'be': 0.14, 'enjoy': 0.1, 'endure': 0.03, 'suffer': 0.03, 'have': 0.02}	1	0.0976562	0.0449219	0.99999	context	context|target	0.52	TRUE	TRUE	TRUE	target	{'enjoy': 0.52, 'enjoying': 0.51}
Verbal & Grammatical Forms	verb_Ving_3pSg	believing is to believes as requiring is to	requires	require	0.14	0.5	1	{'require': 0.14, 'requires': 0.11, 'requiring': 0.03, 'demand': 0.03, 'required': 0.03}	1	0.111816	0.0317383	0.99999	context	context|target	0.52	TRUE	TRUE	TRUE	target	{'requires': 0.52, 'requiring': 0.51}
Verbal & Grammatical Forms	verb_inf_3pSg	include is to includes as involve is to	involves	includes	0.14	0	1	{'includes': 0.14, 'involves': 0.09, '': 0.06, '__': 0.04, '?': 0.04}	1	0.0859375	0.0556641	0.99999	context	context|target	0.52	TRUE	TRUE	TRUE	target	{'involves': 0.52, 'involve': 0.48}
Verbal & Grammatical Forms	verb_inf_3pSg	improve is to improves as send is to	sends		0.14	0	1	{'': 0.08, '?': 0.07, 'sends': 0.07}	4	0.0712891	0.0712891	0.99996	context	context|target	0.52	TRUE	TRUE	TRUE	target	{'sends': 0.52, 'send': 0.51}
Verbal & Grammatical Forms	verb_inf_Ved	become is to became as reduce is to	reduced	reduced	0.14	1	1	{'reduced': 0.14, '______': 0.09, '': 0.03, '__': 0.05}	0	0.139648	0	1	context	context|target	0.52	TRUE	TRUE	TRUE	target	{'reduced': 0.52, 'reduce': 0.5}
Verbal & Grammatical Forms	verb_inf_Ved	become is to became as seem is to	seemed	seemed	0.14	1	1	{'seemed': 0.14, 'seen': 0.12, '______': 0.07, 'seem': 0.07, '__': 0.06}	0	0.140625	0	1	context	context|target	0.52	TRUE	TRUE	TRUE	target	{'seemed': 0.52, 'seem': 0.48}
Verbal & Grammatical Forms	verb_inf_Ved	provide is to provided as receive is to	received	received	0.14	1	1	{'received': 0.14, '': 0.04, '?': 0.04}	0	0.139648	0	1	context	context|target	0.52	TRUE	TRUE	TRUE	target	{'received': 0.52, 'receive': 0.49}
Verbal & Grammatical Forms	verb_Ving_Ved	created is to creating as failed is to	failing	failing	0.14	1	1	{'failing': 0.14, 'failure': 0.09, '__': 0.05, 'what': 0.04, 'failed': 0.04}	0	0.139648	0	1	context	context|target	0.52	TRUE	TRUE	TRUE	target	{'failing': 0.52, 'failed': 0.47}
Verbal & Grammatical Forms	verb_Ving_Ved	existed is to existing as reduced is to	reducing	being	0.14	0	1	{'being': 0.14, 'reduced': 0.1, 'reducing': 0.06, 'the': 0.03, 'real': 0.02}	2	0.060791	0.0759277	0.99998	context	context|target	0.52	TRUE	TRUE	TRUE	target	{'reducing': 0.52, 'reduced': 0.48}
Morphological Modifiers	verb+able_reg	deliverable is to deliver as writeable is to	write	write	0.13	1	1	{'write': 0.13, 'read': 0.1, 'deliver': 0.07, 'writable': 0.04, 'receive': 0.03}	0	0.134766	0	1	context	context|target	0.52	TRUE	TRUE	TRUE	target	{'write': 0.52, 'writeable': 0.47}
Morphological Modifiers	verb+ment_irreg	assessment is to assess as enhancement is to	enhance	enhance	0.13	1	1	{'enhance': 0.13, 'augment': 0.04, 'improve': 0.03, '': 0.02, 'teach': 0.02}	0	0.132812	0	1	context	context|target	0.52	TRUE	TRUE	TRUE	target	{'enhance': 0.52, 'enhancement': 0.5}
Morphological Modifiers	verb+ment_irreg	encourage is to encouragement as engage is to	engagement	engagement	0.13	1	1	{'engagement': 0.13, '': 0.06, '______': 0.05, '__': 0.05}	0	0.12793	0	1	context	context|target	0.52	TRUE	TRUE	TRUE	target	{'engagement': 0.52, 'engage': 0.5}
Verbal & Grammatical Forms	verb_Ving_3pSg	losing is to loses as requiring is to	requires		0.13	0	1	{'': 0.04, '?': 0.04, 'requires': 0.06}	2	0.0566406	0.0712891	0.99998	context	context|target	0.52	TRUE	TRUE	TRUE	target	{'requires': 0.52, 'requiring': 0.51}
Verbal & Grammatical Forms	verb_Ving_3pSg	considers is to considering as sits is to	sitting	sit	0.13	0.5	1	{'sit': 0.13, 'sitting': 0.12, 'sits': 0.06, 'consider': 0.03, 'considering': 0.02}	1	0.118164	0.0078125	0.99999	context	context|target	0.52	TRUE	TRUE	TRUE	target	{'sitting': 0.52, 'sits': 0.51}
Verbal & Grammatical Forms	verb_Ving_3pSg	continues is to continuing as relates is to	relating	related	0.13	0	1	{'related': 0.13, 'relates': 0.08, 'relation': 0.08, 'relating': 0.06, '______': 0.05}	3	0.0554199	0.0773926	0.99997	context	context|target	0.52	TRUE	TRUE	TRUE	target	{'relating': 0.52, 'relates': 0.5}
Verbal & Grammatical Forms	verb_inf_3pSg	create is to creates as describe is to	describes		0.13	0	1	{'': 0.06, 'describes': 0.06, '______': 0.05, '__': 0.04}	2	0.0598145	0.0749512	0.99998	context	context|target	0.52	TRUE	TRUE	TRUE	target	{'describes': 0.52, 'describe': 0.49}
Verbal & Grammatical Forms	verb_inf_3pSg	agree is to agrees as consider is to	considers	considers	0.13	1	1	{'considers': 0.13, '': 0.08, '?': 0.03}	0	0.125977	0	1	context	context|target	0.52	TRUE	TRUE	TRUE	target	{'considers': 0.52, 'consider': 0.49}
Verbal & Grammatical Forms	verb_inf_Ving	continue is to continuing as enjoy is to	enjoying	enjoying	0.13	1	1	{'enjoying': 0.13, '______': 0.08, 'enjoyment': 0.05, '?': 0.05, '__': 0.05}	0	0.130859	0	1	context	context|target	0.52	TRUE	TRUE	TRUE	target	{'enjoying': 0.52, 'enjoy': 0.51}
Verbal & Grammatical Forms	verb_inf_Ving	enjoy is to enjoying as provide is to	providing	providing	0.13	1	1	{'providing': 0.13, '______': 0.06, '': 0.04, '__': 0.04}	0	0.126953	0	1	context	context|target	0.52	TRUE	TRUE	TRUE	target	{'providing': 0.52, 'provide': 0.47}
Verbal & Grammatical Forms	verb_3pSg_Ved	continues is to continued as creates is to	created	created	0.13	1	1	{'created': 0.13, 'creates': 0.12, 'creation': 0.09, '__': 0.05, '': 0.04}	0	0.131836	0	1	context	context|target	0.52	TRUE	TRUE	TRUE	target	{'created': 0.52, 'creates': 0.5}
Factual Knowledge	country_capital	Greece is to Athens as Egypt is to	cairo	Cairo	0.12	1	1	{'Cairo': 0.12, '______': 0.09, '__': 0.06, ':': 0.05}	0	0.117188	0	1	context	context|target	0.52	TRUE	TRUE	TRUE	target	{'cairo': 0.52, 'egypt': 0.48}
Factual Knowledge	capital_world	Greece is to Athens as Egypt is to	cairo	Cairo	0.12	1	1	{'Cairo': 0.12, '______': 0.09, '__': 0.06, ':': 0.05}	0	0.117188	0	1	context	context|target	0.52	TRUE	TRUE	TRUE	target	{'cairo': 0.52, 'egypt': 0.48}
Morphological Modifiers	verb+ment_irreg	development is to develop as enhancement is to	enhance	enhance	0.12	1	1	{'enhance': 0.12, 'repair': 0.05, 'improve': 0.04, 'enhancement': 0.03, 'maintain': 0.03}	0	0.116699	0	1	context	context|target	0.52	TRUE	TRUE	TRUE	target	{'enhance': 0.52, 'enhancement': 0.51}
Morphological Modifiers	adj_superlative	hottest is to hot as subtlest is to	subtle	subtle	0.12	1	1	{'subtle': 0.12, '______': 0.07, '_____': 0.05, 'thin': 0.03, '': 0.03}	0	0.125	0	1	context	context|target	0.52	TRUE	TRUE	TRUE	target	{'subtle': 0.52, 'subtlest': 0.48}
Morphological Modifiers	verb+ment_irreg	assessment is to assess as encouragement is to	encourage	encourage	0.12	1	1	{'encourage': 0.12, 'discourage': 0.09, 'motivate': 0.07, 'inspire': 0.04, 'praise': 0.04}	0	0.123047	0	1	context	context|target	0.52	TRUE	TRUE	TRUE	target	{'encourage': 0.52, 'encouragement': 0.49}
Morphological Modifiers	adj_comparative	cheaper is to cheap as harsher is to	harsh	harsh	0.12	1	1	{'harsh': 0.12, 'expensive': 0.05, 'kind': 0.04, 'mild': 0.03, 'm': 0.03}	0	0.123535	0	1	context	context|target	0.52	TRUE	TRUE	TRUE	target	{'harsh': 0.52, 'harsher': 0.49}
Verbal & Grammatical Forms	verb_inf_Ving	achieve is to achieving as enjoy is to	enjoying	enjoying	0.12	1	1	{'enjoying': 0.12, 'enjoyment': 0.12, '______': 0.07, 'pleasure': 0.04, '__': 0.04}	0	0.125	0	1	context	context|target	0.52	TRUE	TRUE	TRUE	target	{'enjoying': 0.52, 'enjoy': 0.51}
Verbal & Grammatical Forms	plural	women is to woman as eagles is to	eagle	eagle	0.12	1	1	{'eagle': 0.12, 'eag': 0.1, 'birds': 0.06, '______': 0.06, '__': 0.06}	0	0.124512	0	1	context	context|target	0.52	TRUE	TRUE	TRUE	target	{'eagle': 0.52, 'eagles': 0.48}
Verbal & Grammatical Forms	verb_inf_3pSg	continue is to continues as ensure is to	ensures	ensure	0.12	0.5	1	{'ensure': 0.12, 'ensures': 0.08, '______': 0.08, '__': 0.05, '': 0.04}	1	0.0844727	0.0385742	0.99999	context	context|target	0.52	TRUE	TRUE	TRUE	target	{'ensures': 0.52, 'ensure': 0.48}
Verbal & Grammatical Forms	verb_inf_3pSg	create is to creates as prevent is to	prevents	prevents	0.12	1	1	{'prevents': 0.12, '': 0.04, '______': 0.04, '?': 0.04}	0	0.117188	0	1	context	context|target	0.52	TRUE	TRUE	TRUE	target	{'prevents': 0.52, 'prevent': 0.5}
Verbal & Grammatical Forms	verb_inf_3pSg	follow is to follows as seem is to	seems	seems	0.12	1	1	{'seems': 0.12, 'seem': 0.09, '': 0.04, 'see': 0.04}	0	0.124512	0	1	context	context|target	0.52	TRUE	TRUE	TRUE	target	{'seems': 0.52, 'seem': 0.49}
Verbal & Grammatical Forms	verb_inf_3pSg	seem is to seems as suggest is to	suggests	suggests	0.12	1	1	{'suggests': 0.12, '': 0.06, '?': 0.05, '__': 0.04}	0	0.120117	0	1	context	context|target	0.52	TRUE	TRUE	TRUE	target	{'suggests': 0.52, 'suggest': 0.49}
Verbal & Grammatical Forms	verb_inf_Ving	improve is to improving as learn is to	learning	?	0.12	0	1	{'?': 0.05, '': 0.07, 'learning': 0.05, '______': 0.04}	3	0.0480957	0.0671387	0.99997	context	context|target	0.52	TRUE	TRUE	TRUE	target	{'learning': 0.52, 'learn': 0.48}
Verbal & Grammatical Forms	verb_inf_Ving	protect is to protecting as require is to	requiring	requiring	0.12	1	1	{'requiring': 0.12, '': 0.06, '?': 0.04, '__': 0.03, '______': 0.03}	0	0.118164	0	1	context	context|target	0.52	TRUE	TRUE	TRUE	target	{'requiring': 0.52, 'require': 0.49}
Morphological Modifiers	verb+ment_irreg	development is to develop as establishment is to	establish	establish	0.11	1	1	{'establish': 0.11, 'maintain': 0.06, 'establishment': 0.03, 'destroy': 0.02, '': 0.02}	0	0.105469	0	1	context	context|target	0.52	TRUE	TRUE	TRUE	target	{'establish': 0.52, 'establishment': 0.47}
Morphological Modifiers	verb+able_reg	deliver is to deliverable as rely is to	reliable	reliable	0.11	1	1	{'reliable': 0.11, '': 0.08, ':': 0.06, '"': 0.04}	0	0.113281	0	1	context	context|target	0.52	TRUE	TRUE	TRUE	target	{'reliable': 0.52, 'rely': 0.51}
Morphological Modifiers	adj_comparative	hungrier is to hungry as stricter is to	strict	strict	0.11	1	1	{'strict': 0.11, '______': 0.08, 'len': 0.07, '_____': 0.05, '': 0.04}	0	0.105957	0	1	context	context|target	0.52	TRUE	TRUE	TRUE	target	{'strict': 0.52, 'stricter': 0.5}
Morphological Modifiers	adj_comparative	sad is to sadder as strong is to	stronger	stronger	0.11	1	1	{'stronger': 0.11, 'weaker': 0.09, '______': 0.05, '__': 0.04, '"': 0.03}	0	0.111816	0	1	context	context|target	0.52	TRUE	TRUE	TRUE	target	{'stronger': 0.52, 'strong': 0.51}
Morphological Modifiers	verb+er_irreg	follower is to follow as organiser is to	organise	organise	0.11	1	1	{'organise': 0.11, '?': 0.05, '': 0.04, 'organ': 0.04, '______': 0.03}	0	0.111816	0	1	context	context|target	0.52	TRUE	TRUE	TRUE	target	{'organise': 0.52, 'organiser': 0.5}
Verbal & Grammatical Forms	verb_inf_Ving	achieve is to achieving as add is to	adding	addition	0.11	0	1	{'addition': 0.11, 'add': 0.08, 'adding': 0.03, 'achieve': 0.03, '': 0.03}	2	0.0341797	0.0712891	0.99998	context	context|target	0.52	TRUE	TRUE	TRUE	target	{'adding': 0.52, 'add': 0.51}
Verbal & Grammatical Forms	verb_inf_Ving	add is to adding as ask is to	asking	asking	0.11	1	1	{'asking': 0.11, '': 0.04, 'answering': 0.04, '?': 0.03}	0	0.114258	0	1	context	context|target	0.52	TRUE	TRUE	TRUE	target	{'asking': 0.52, 'ask': 0.49}
Verbal & Grammatical Forms	verb_inf_3pSg	continue is to continues as prevent is to	prevents		0.11	0	1	{'': 0.11, '______': 0.07, 'prevents': 0.06, '__': 0.05, '?': 0.04}	2	0.0605469	0.0454102	0.99998	context	context|target	0.52	TRUE	TRUE	TRUE	target	{'prevents': 0.52, 'prevent': 0.5}
Verbal & Grammatical Forms	verb_inf_3pSg	create is to creates as represent is to	represents		0.11	0	1	{'': 0.04, 'represents': 0.11, '__': 0.05, '?': 0.04}	1	0.108398	0	0.99999	context	context|target	0.52	TRUE	TRUE	TRUE	target	{'represents': 0.52, 'represent': 0.48}
Verbal & Grammatical Forms	verb_inf_3pSg	describe is to describes as seem is to	seems	seem	0.11	0.5	1	{'seem': 0.11, 'seems': 0.08, '______': 0.07, '': 0.06, '__': 0.04}	1	0.0776367	0.0351562	0.99999	context	context|target	0.52	TRUE	TRUE	TRUE	target	{'seems': 0.52, 'seem': 0.49}
Verbal & Grammatical Forms	verb_inf_Ved	develop is to developed as replace is to	replaced	?	0.11	0	1	{'?': 0.11, '': 0.07, 'replaced': 0.06, 'removed': 0.04, '______': 0.04}	2	0.0610352	0.0458984	0.99998	context	context|target	0.52	TRUE	TRUE	TRUE	target	{'replaced': 0.52, 'replace': 0.5}
Verbal & Grammatical Forms	verb_inf_Ving	continue is to continuing as spend is to	spending	spending	0.11	1	1	{'spending': 0.11, '?': 0.07, '______': 0.06, '': 0.05, '__': 0.04}	0	0.111328	0	1	context	context|target	0.52	TRUE	TRUE	TRUE	target	{'spending': 0.52, 'spend': 0.49}
Verbal & Grammatical Forms	verb_inf_Ving	maintain is to maintaining as remain is to	remaining		0.11	0	1	{'': 0.05, '______': 0.09, 'remaining': 0.09, '_____': 0.06}	1	0.0942383	0.0195312	0.99999	context	context|target	0.52	TRUE	TRUE	TRUE	target	{'remaining': 0.52, 'remain': 0.48}
Verbal & Grammatical Forms	verb_Ving_Ved	publishing is to published as teaching is to	taught	taught	0.11	1	1	{'taught': 0.11, '__': 0.07, '______': 0.06, 'learned': 0.04, 'educated': 0.04}	0	0.109375	0	1	context	context|target	0.52	TRUE	TRUE	TRUE	target	{'taught': 0.52, 'teaching': 0.48}
Morphological Modifiers	adj_superlative	hottest is to hot as strongest is to	strong	strongest	0.1	0	1	{'strongest': 0.1, 'strong': 0.06, 'what': 0.05, '"': 0.05, '______': 0.04}	1	0.0554199	0.0480957	0.99999	context	context|target	0.52	TRUE	TRUE	TRUE	target	{'strong': 0.52, 'strongest': 0.49}
Morphological Modifiers	verb+ment_irreg	achieve is to achievement as advertise is to	advertisement	advertisement	0.1	1	1	{'advertisement': 0.1, '______': 0.09, '__': 0.06, '': 0.05, '_____': 0.04}	0	0.103516	0	1	context	context|target	0.52	TRUE	TRUE	TRUE	target	{'advertisement': 0.52, 'advertise': 0.51}
Morphological Modifiers	verb+ment_irreg	equip is to equipment as harass is to	harassment	harassment	0.1	1	1	{'harassment': 0.1, '______': 0.07, '?': 0.06, '__': 0.05}	0	0.0986328	0	1	context	context|target	0.52	TRUE	TRUE	TRUE	target	{'harassment': 0.52, 'harass': 0.5}
Morphological Modifiers	superlative	weird is to weirdest as strong is to	strongest	strongest	0.1	1	1	{'strongest': 0.1, '______': 0.1, '__': 0.05, '____': 0.04, 'what': 0.04}	0	0.10498	0	1	context	context|target	0.52	TRUE	TRUE	TRUE	target	{'strongest': 0.52, 'strong': 0.49}
Morphological Modifiers	superlative	hottest is to hot as strongest is to	strong	strongest	0.1	0	1	{'strongest': 0.1, 'strong': 0.06, 'what': 0.05, '"': 0.05, '______': 0.04}	1	0.0554199	0.0480957	0.99999	context	context|target	0.52	TRUE	TRUE	TRUE	target	{'strong': 0.52, 'strongest': 0.49}
Morphological Modifiers	verb+er_irreg	loser is to lose as teacher is to	teach	teach	0.1	1	1	{'teach': 0.1, '_____': 0.06, '': 0.05, '______': 0.05, '__': 0.04}	0	0.101562	0	1	context	context|target	0.52	TRUE	TRUE	TRUE	target	{'teach': 0.52, 'teacher': 0.5}
Verbal & Grammatical Forms	verb_Ving_3pSg	hearing is to hears as requiring is to	requires		0.1	0	1	{'': 0.07, '"': 0.04, '______': 0.04, 'requires': 0.04}	4	0.0373535	0.064209	0.99996	context	context|target	0.52	TRUE	TRUE	TRUE	target	{'requires': 0.52, 'requiring': 0.51}
Verbal & Grammatical Forms	verb_Ving_3pSg	considers is to considering as develops is to	developing	develop	0.1	0.5	1	{'develop': 0.1, 'developing': 0.07, 'development': 0.03, 'develops': 0.03, 'consider': 0.02}	1	0.0688477	0.03125	0.99999	context	context|target	0.52	TRUE	TRUE	TRUE	target	{'developing': 0.52, 'develops': 0.5}
Verbal & Grammatical Forms	verb_Ving_3pSg	applies is to applying as relates is to	relating	relates	0.1	0	1	{'relates': 0.1, 'relating': 0.08, 'related': 0.06, 'applies': 0.04, 'relation': 0.04}	1	0.0800781	0.0166016	0.99999	context	context|target	0.52	TRUE	TRUE	TRUE	target	{'relating': 0.52, 'relates': 0.5}
Verbal & Grammatical Forms	verb_Ving_3pSg	allows is to allowing as appears is to	appearing	appearing	0.1	1	1	{'appearing': 0.1, 'appears': 0.09, 'appearance': 0.07, 'seeming': 0.06, 'appeared': 0.04}	0	0.103516	0	1	context	context|target	0.52	TRUE	TRUE	TRUE	target	{'appearing': 0.52, 'appears': 0.5}
Verbal & Grammatical Forms	verb_Ving_3pSg	containing is to contains as developing is to	develops		0.1	0	1	{'': 0.05, 'develops': 0.08, '______': 0.06, 'develop': 0.05}	1	0.0791016	0.0161133	0.99999	context	context|target	0.52	TRUE	TRUE	TRUE	target	{'develops': 0.52, 'developing': 0.5}
Verbal & Grammatical Forms	verb_inf_3pSg	avoid is to avoids as continue is to	continues	continues	0.1	1	1	{'continues': 0.1, '': 0.09, 'continue': 0.06, '__': 0.06, '______': 0.05}	0	0.10498	0	1	context	context|target	0.52	TRUE	TRUE	TRUE	target	{'continues': 0.52, 'continue': 0.5}
Verbal & Grammatical Forms	verb_inf_3pSg	learns is to learn as sends is to	send	send	0.1	1	1	{'send': 0.1, 'sent': 0.08, 'receive': 0.07, 'sends': 0.07, 'receives': 0.07}	0	0.102051	0	1	context	context|target	0.52	TRUE	TRUE	TRUE	target	{'send': 0.52, 'sends': 0.51}
Verbal & Grammatical Forms	verb_inf_3pSg	maintain is to maintains as send is to	sends		0.1	0	1	{'': 0.1, 'sends': 0.07, '______': 0.06, '?': 0.05, '_____': 0.04}	1	0.0683594	0.03125	0.99999	context	context|target	0.52	TRUE	TRUE	TRUE	target	{'sends': 0.52, 'send': 0.51}
Verbal & Grammatical Forms	verb_inf_3pSg	achieve is to achieves as exist is to	exists		0.1	0	1	{'': 0.05, 'exists': 0.07, 'exist': 0.07, '______': 0.04}	2	0.0654297	0.0356445	0.99998	context	context|target	0.52	TRUE	TRUE	TRUE	target	{'exists': 0.52, 'exist': 0.48}
Verbal & Grammatical Forms	verb_inf_Ved	develop is to developed as identify is to	identified		0.1	0	1	{'': 0.04, 'identified': 0.1, '______': 0.06, '?': 0.06}	1	0.0991211	0	0.99999	context	context|target	0.52	TRUE	TRUE	TRUE	target	{'identified': 0.52, 'identify': 0.49}
Verbal & Grammatical Forms	verb_inf_Ved	ask is to asked as involve is to	involved	?	0.1	0	1	{'?': 0.04, '': 0.06, 'involved': 0.09}	2	0.0913086	0.012207	0.99998	context	context|target	0.52	TRUE	TRUE	TRUE	target	{'involved': 0.52, 'involve': 0.5}
Verbal & Grammatical Forms	verb_inf_Ving	continue is to continuing as encourage is to	encouraging	encouraging	0.1	1	1	{'encouraging': 0.1, '______': 0.08, '__': 0.07, '?': 0.05, '': 0.05}	0	0.0952148	0	1	context	context|target	0.52	TRUE	TRUE	TRUE	target	{'encouraging': 0.52, 'encourage': 0.5}
Verbal & Grammatical Forms	verb_Ving_Ved	reduced is to reducing as remained is to	remaining	______	0.1	0	1	{'______': 0.1, '__': 0.08, 'remaining': 0.07, '?': 0.06, '': 0.04}	2	0.0654297	0.0361328	0.99998	context	context|target	0.52	TRUE	TRUE	TRUE	target	{'remaining': 0.52, 'remained': 0.47}
Factual Knowledge	country_capital	Denmark is to Copenhagen as Bulgaria is to	sofia	:	0.09	0	1	{':': 0.06, 'Sofia': 0.06, '______': 0.05, 'what': 0.05}	1	0.0629883	0.0234375	0.99999	context	context|target	0.52	TRUE	TRUE	TRUE	target	{'sofia': 0.52, 'bulgaria': 0.47}
Factual Knowledge	country_capital	Turkey is to Ankara as Thailand is to	bangkok	Bangkok	0.09	1	1	{'Bangkok': 0.09, '______': 0.09, '?': 0.05, 'what': 0.05, '': 0.05}	0	0.0913086	0	1	context	context|target	0.52	TRUE	TRUE	TRUE	target	{'bangkok': 0.52, 'thailand': 0.5}
Factual Knowledge	capital_world	Turkey is to Ankara as Thailand is to	bangkok	Bangkok	0.09	1	1	{'Bangkok': 0.09, '______': 0.09, '?': 0.05, 'what': 0.05, '': 0.05}	0	0.0913086	0	1	context	context|target	0.52	TRUE	TRUE	TRUE	target	{'bangkok': 0.52, 'thailand': 0.5}
Morphological Modifiers	verb+ment_irreg	develop is to development as excite is to	excitement	excitement	0.09	1	1	{'excitement': 0.09, '______': 0.09, '': 0.05, '?': 0.04}	0	0.0864258	0	1	context	context|target	0.52	TRUE	TRUE	TRUE	target	{'excitement': 0.52, 'excite': 0.47}
Morphological Modifiers	verb+able_reg	deliver is to deliverable as download is to	downloadable	downloadable	0.09	1	1	{'downloadable': 0.09, ':': 0.06, '': 0.06, 'download': 0.04}	0	0.0888672	0	1	context	context|target	0.52	TRUE	TRUE	TRUE	target	{'downloadable': 0.52, 'download': 0.48}
Morphological Modifiers	verb+ment_irreg	achieve is to achievement as enhance is to	enhancement	______	0.09	0	1	{'______': 0.09, 'enhancement': 0.08, '__': 0.06, '': 0.06}	1	0.0810547	0.0112305	0.99999	context	context|target	0.52	TRUE	TRUE	TRUE	target	{'enhancement': 0.52, 'enhance': 0.5}
Morphological Modifiers	adj_comparative	healthier is to healthy as stricter is to	strict	strict	0.09	1	1	{'strict': 0.09, '______': 0.08, 'stricter': 0.06, 'len': 0.06, '_____': 0.03}	0	0.0898438	0	1	context	context|target	0.52	TRUE	TRUE	TRUE	target	{'strict': 0.52, 'stricter': 0.5}
Morphological Modifiers	adj_comparative	cuter is to cute as nastier is to	nasty	nasty	0.09	1	1	{'nasty': 0.09, '': 0.05, '______': 0.04, ':': 0.03}	0	0.0888672	0	1	context	context|target	0.52	TRUE	TRUE	TRUE	target	{'nasty': 0.52, 'nastier': 0.47}
Verbal & Grammatical Forms	verb_Ving_3pSg	receives is to receiving as sits is to	sitting	sitting	0.09	1	1	{'sitting': 0.09, 'sits': 0.08, '"': 0.05, 'sit': 0.04, '': 0.03}	0	0.0913086	0	1	context	context|target	0.52	TRUE	TRUE	TRUE	target	{'sitting': 0.52, 'sits': 0.5}
Verbal & Grammatical Forms	verb_inf_Ving	add is to adding as allow is to	allowing	allowing	0.09	1	1	{'allowing': 0.09, 'permitting': 0.07, '': 0.04, ':': 0.04}	0	0.0864258	0	1	context	context|target	0.52	TRUE	TRUE	TRUE	target	{'allowing': 0.52, 'allow': 0.48}
Verbal & Grammatical Forms	verb_inf_3pSg	prevents is to prevent as represents is to	represent	represents	0.09	0	1	{'represents': 0.09, 'represent': 0.07, '': 0.03, 'to': 0.03, 'is': 0.02}	1	0.0668945	0.0244141	0.99999	context	context|target	0.52	TRUE	TRUE	TRUE	target	{'represent': 0.52, 'represents': 0.48}
Verbal & Grammatical Forms	verb_inf_3pSg	create is to creates as include is to	includes	include	0.09	0.5	1	{'include': 0.09, 'includes': 0.09, '': 0.04, '__': 0.04}	1	0.0864258	0.00537109	0.99999	context	context|target	0.52	TRUE	TRUE	TRUE	target	{'includes': 0.52, 'include': 0.51}
Verbal & Grammatical Forms	verb_inf_3pSg	create is to creates as seem is to	seems		0.09	0	1	{'': 0.04, 'seems': 0.09, '______': 0.05, 'seem': 0.05}	1	0.0859375	0	0.99999	context	context|target	0.52	TRUE	TRUE	TRUE	target	{'seems': 0.52, 'seem': 0.5}
Verbal & Grammatical Forms	verb_inf_3pSg	achieve is to achieves as agree is to	agrees		0.09	0	1	{'': 0.06, 'agree': 0.07, '______': 0.05, 'agrees': 0.05}	4	0.050293	0.0380859	0.99996	context	context|target	0.52	TRUE	TRUE	TRUE	target	{'agrees': 0.52, 'agree': 0.49}
Verbal & Grammatical Forms	noun_plural_reg	hours is to hour as sciences is to	science	science	0.09	1	1	{'science': 0.09, '?': 0.04, '': 0.03}	0	0.0922852	0	1	context	context|target	0.52	TRUE	TRUE	TRUE	target	{'science': 0.52, 'sciences': 0.47}
Verbal & Grammatical Forms	noun_plural_reg	periods is to period as villages is to	village	city	0.09	0	1	{'city': 0.09, 'village': 0.07, 'cities': 0.06, 'towns': 0.05, '______': 0.04}	1	0.0708008	0.0146484	0.99999	context	context|target	0.52	TRUE	TRUE	TRUE	target	{'village': 0.52, 'villages': 0.51}
Verbal & Grammatical Forms	verb_inf_3pSg	seem is to seems as send is to	sends	sends	0.09	1	1	{'sends': 0.09, '?': 0.06, '': 0.07, 'sent': 0.07}	0	0.0883789	0	1	context	context|target	0.52	TRUE	TRUE	TRUE	target	{'sends': 0.52, 'send': 0.5}
Verbal & Grammatical Forms	noun_plural_irreg	datum is to data as duty is to	duties	duty	0.09	0	1	{'duty': 0.09, 'due': 0.08, 'duties': 0.06, 'dues': 0.04, '__': 0.04}	2	0.0556641	0.0361328	0.99998	context	context|target	0.52	TRUE	TRUE	TRUE	target	{'duties': 0.52, 'duty': 0.5}
Morphological Modifiers	adj_comparative	denser is to dense as rockier is to	rocky	"	0.08	0	1	{'"': 0.08, '': 0.06, 'rocky': 0.05, ':': 0.05}	4	0.0524902	0.0290527	0.99996	context	context|target	0.52	TRUE	TRUE	TRUE	target	{'rocky': 0.52, 'rockier': 0.48}
Morphological Modifiers	adj+ness_reg	madness is to mad as niceness is to	nice	______	0.08	0	1	{'______': 0.08, 'nice': 0.05, '_____': 0.05, '"': 0.04, '____': 0.03}	1	0.0537109	0.0244141	0.99999	context	context|target	0.52	TRUE	TRUE	TRUE	target	{'nice': 0.52, 'niceness': 0.46}
Verbal & Grammatical Forms	verb_inf_Ving	achieve is to achieving as develop is to	developing		0.08	0	1	{'': 0.08, 'development': 0.08, 'develop': 0.07, '______': 0.07, 'developing': 0.05}	4	0.0546875	0.0249023	0.99996	context	context|target	0.52	TRUE	TRUE	TRUE	target	{'developing': 0.52, 'develop': 0.47}
Verbal & Grammatical Forms	verb_inf_Ving	ask is to asking as protect is to	protecting	______	0.08	0	1	{'______': 0.08, 'protecting': 0.05, '__': 0.05, '_____': 0.05, '': 0.04}	1	0.0544434	0.0300293	0.99999	context	context|target	0.52	TRUE	TRUE	TRUE	target	{'protecting': 0.52, 'protect': 0.49}
Verbal & Grammatical Forms	verb_inf_Ving	ask is to asking as attend is to	attending	attendance	0.08	0	1	{'attendance': 0.08, 'answer': 0.04, 'attending': 0.04, '?': 0.04, '': 0.04}	4	0.0405273	0.0351562	0.99996	context	context|target	0.52	TRUE	TRUE	TRUE	target	{'attending': 0.52, 'attend': 0.49}
Verbal & Grammatical Forms	verb_inf_Ving	believe is to believing as continue is to	continuing	continuing	0.08	1	1	{'continuing': 0.08, 'continue': 0.08, '______': 0.05, 'beginning': 0.04, 'begin': 0.04}	0	0.0830078	0	1	context	context|target	0.52	TRUE	TRUE	TRUE	target	{'continuing': 0.52, 'continue': 0.5}
Verbal & Grammatical Forms	verb_inf_3pSg	believe is to believes as send is to	sends	sends	0.08	1	1	{'sends': 0.08, 'receives': 0.07, '______': 0.04, 'receive': 0.04, 'sent': 0.04}	0	0.0839844	0	1	context	context|target	0.52	TRUE	TRUE	TRUE	target	{'sends': 0.52, 'send': 0.49}
Verbal & Grammatical Forms	verb_inf_Ved	develop is to developed as perform is to	performed	?	0.08	0	1	{'?': 0.08, '': 0.07, 'performed': 0.06, '______': 0.05, '"': 0.04}	2	0.0622559	0.0129395	0.99998	context	context|target	0.52	TRUE	TRUE	TRUE	target	{'performed': 0.52, 'perform': 0.48}
Verbal & Grammatical Forms	verb_inf_Ved	involve is to involved as provide is to	provided	provided	0.08	1	1	{'provided': 0.08, '?': 0.08, '': 0.05, '______': 0.04}	0	0.0844727	0	1	context	context|target	0.52	TRUE	TRUE	TRUE	target	{'provided': 0.52, 'provide': 0.48}
Verbal & Grammatical Forms	verb_inf_Ving	follow is to following as tell is to	telling		0.08	0	1	{'': 0.05, '?': 0.07, 'telling': 0.06, 'listening': 0.04}	2	0.0578613	0.026123	0.99998	context	context|target	0.52	TRUE	TRUE	TRUE	target	{'telling': 0.52, 'tell': 0.48}
Morphological Modifiers	adj_comparative	denser is to dense as purer is to	pure	pure	0.07	1	1	{'pure': 0.07, '': 0.06, '"': 0.06, '______': 0.05, ':': 0.05}	0	0.0693359	0	1	context	context|target	0.52	TRUE	TRUE	TRUE	target	{'pure': 0.52, 'purer': 0.46}
Morphological Modifiers	verb+ment_irreg	encouragement is to encourage as investment is to	invest	capital	0.07	0	1	{'capital': 0.07, 'invest': 0.07, 'discourage': 0.06, 'encourage': 0.05, 'save': 0.04}	0	0.0732422	0	1	context	context|target	0.52	TRUE	TRUE	TRUE	target	{'invest': 0.52, 'investment': 0.5}
Morphological Modifiers	un+adj_reg	unacceptable is to acceptable as unnoticed is to	noticed	noticed	0.07	1	1	{'noticed': 0.07, '______': 0.05, '__': 0.04, '': 0.04, 'noticeable': 0.03}	0	0.0722656	0	1	context	context|target	0.52	TRUE	TRUE	TRUE	target	{'noticed': 0.52, 'unnoticed': 0.5}
Verbal & Grammatical Forms	verb_inf_3pSg	believe is to believes as describe is to	describes	______	0.07	0	1	{'______': 0.07, '': 0.05, 'describes': 0.06, '__': 0.06}	3	0.0583496	0.0119629	0.99997	context	context|target	0.52	TRUE	TRUE	TRUE	target	{'describes': 0.52, 'describe': 0.49}
Verbal & Grammatical Forms	verb_inf_3pSg	avoids is to avoid as provides is to	provide	provides	0.07	0	1	{'provides': 0.07, 'provide': 0.06, 'avoid': 0.05, 'avoids': 0.03, 'have': 0.02}	1	0.0583496	0.0119629	0.99999	context	context|target	0.52	TRUE	TRUE	TRUE	target	{'provide': 0.52, 'provides': 0.49}
Verbal & Grammatical Forms	verb_inf_3pSg	add is to adds as consider is to	considers	consider	0.07	0.5	1	{'consider': 0.07, '': 0.03, 'considers': 0.05, '?': 0.03}	2	0.0463867	0.0253906	0.99998	context	context|target	0.52	TRUE	TRUE	TRUE	target	{'considers': 0.52, 'consider': 0.49}
Verbal & Grammatical Forms	verb_Ving_Ved	publishing is to published as understanding is to	understood	understood	0.07	1	1	{'understood': 0.07, 'understand': 0.06, '__': 0.06, '______': 0.05, 'understanding': 0.04}	0	0.0708008	0	1	context	context|target	0.52	TRUE	TRUE	TRUE	target	{'understood': 0.52, 'understanding': 0.48}
Verbal & Grammatical Forms	verb_inf_Ving	asking is to ask as encouraging is to	encourage	discourage	0.06	0	1	{'discourage': 0.06, 'criticize': 0.04, 'praise': 0.04, 'be': 0.03, 'encourage': 0.02}	4	0.0246582	0.0310059	0.99996	context	context|target	0.52	TRUE	TRUE	TRUE	target	{'encourage': 0.52, 'encouraging': 0.49}
Verbal & Grammatical Forms	verb_inf_3pSg	believe is to believes as follow is to	follows	follows	0.06	1	1	{'follows': 0.06, 'follow': 0.04, '': 0.04, '______': 0.04, 'leads': 0.04}	0	0.059082	0	1	context	context|target	0.52	TRUE	TRUE	TRUE	target	{'follows': 0.52, 'follow': 0.49}
Verbal & Grammatical Forms	verb_inf_3pSg	apply is to applies as prevent is to	prevents	______	0.06	0	1	{'______': 0.06, '_____': 0.04, '__': 0.04, '____': 0.04, 'prevents': 0.03}	4	0.0317383	0.027832	0.99996	context	context|target	0.52	TRUE	TRUE	TRUE	target	{'prevents': 0.52, 'prevent': 0.5}
Morphological Modifiers	verb+ment_irreg	advertisement is to advertise as involvement is to	involve	participate	0.05	0	1	{'participate': 0.05, 'involvement': 0.05, 'participation': 0.03, 'involve': 0.03, 'experience': 0.03}	4	0.0257568	0.0223389	0.99996	context	context|target	0.52	TRUE	TRUE	TRUE	target	{'involve': 0.52, 'involvement': 0.49}
Verbal & Grammatical Forms	verb_inf_Ving	add is to adding as improve is to	improving	improving	0.05	1	1	{'improving': 0.05, '?': 0.05, '____': 0.04, '______': 0.04, '': 0.04}	1	0.0458984	0	0.99999	context	context|target	0.52	TRUE	TRUE	TRUE	target	{'improving': 0.52, 'improve': 0.49}
Morphological Modifiers	verb+ment_irreg	development is to develop as harassment is to	harass	sexual	0.04	0	1	{'sexual': 0.04, 'protect': 0.03, 'develop': 0.03, 'harass': 0.03, 'abuse': 0.03}	3	0.0275879	0.0100098	0.99997	context	context|target	0.52	TRUE	TRUE	TRUE	target	{'harass': 0.52, 'harassment': 0.49}
Morphological Modifiers	verb+ment_irreg	adjustment is to adjust as enhancement is to	enhance	adjust	0.03	0	1	{'adjust': 0.03, 'enhancement': 0.02, 'diminish': 0.02, 'enhance': 0.02, 'correct': 0.02}	2	0.0185547	0.013916	0.99998	context	context|target	0.52	TRUE	TRUE	TRUE	target	{'enhance': 0.52, 'enhancement': 0.51}
Morphological Modifiers	re+verb_reg	introduce is to reintroduce as publish is to	republish	publish	0.86	0	0.5	{'publish': 0.86, 'rep': 0.02, '__': 0.01, '': 0.0}	1	0.0228271	0.832642	0.99999	context	context|target	0.52	TRUE	TRUE	TRUE	target	{'republish': 0.52, 'publish': 0.51}
Morphological Modifiers	verb+tion_irreg	derivation is to derive as starvation is to	starve	star	0.8	0.5	0.5	{'star': 0.8, 'st': 0.02, 'starvation': 0.01, 'to': 0.01, 'starving': 0.01}	0	0.804688	0	1	context	context|target	0.52	TRUE	TRUE	TRUE	target	{'starve': 0.52, 'starvation': 0.5}
Morphological Modifiers	re+verb_reg	assess is to reassess as configure is to	reconfigure	configure	0.8	0	0.5	{'configure': 0.8, 're': 0.04, 'config': 0.01, 'conf': 0.01, '__': 0.01}	1	0.0397949	0.760986	0.99999	context	context|target	0.52	TRUE	TRUE	TRUE	target	{'reconfigure': 0.52, 'configure': 0.52}
Morphological Modifiers	noun+less_reg	god is to godless as tact is to	tactless	tact	0.78	0.5	0.5	{'tact': 0.78, '______': 0.02, 'tack': 0.02, 't': 0.02, '__': 0.01}	0	0.777344	0	1	context	context|target	0.52	TRUE	TRUE	TRUE	target	{'tactless': 0.52, 'tact': 0.47}
Morphological Modifiers	re+verb_reg	configure is to reconfigure as deem is to	redeem	deem	0.76	0	0.5	{'deem': 0.76, 'de': 0.03, 'deemed': 0.01, 're': 0.01, '______': 0.01}	108	0.000225067	0.761494	0.998924	context	context|target	0.52	TRUE	TRUE	TRUE	target	{'redeem': 0.52, 'deem': 0.45}
Factual Knowledge	capital_world	Damascus is to Syria as Maputo is to	mozambique	Moz	0.72	0.5	0.5	{'Moz': 0.72, 'what': 0.07, '__': 0.02, 'which': 0.02, '______': 0.02}	0	0.722656	0	1	context	context|target	0.52	TRUE	TRUE	TRUE	target	{'mozambique': 0.52, 'maputo': 0.48}
Morphological Modifiers	re+verb_reg	apply is to reapply as publish is to	republish	publish	0.68	0	0.5	{'publish': 0.68, 'commit': 0.03, 'pub': 0.02, 'print': 0.02, 'rep': 0.01}	4	0.0117188	0.667969	0.99996	context	context|target	0.52	TRUE	TRUE	TRUE	target	{'republish': 0.52, 'publish': 0.51}
Morphological Modifiers	noun+less_reg	godless is to god as mirthless is to	mirth	m	0.67	0.5	0.5	{'m': 0.67, 'merry': 0.1, 'joy': 0.02, '______': 0.01, '': 0.01}	872	1.33514e-05	0.671862	0.991311	context	context|target	0.52	TRUE	TRUE	TRUE	target	{'mirth': 0.52, 'mirthless': 0.45}
Morphological Modifiers	re+verb_reg	configure is to reconfigure as submit is to	resubmit	submit	0.66	0	0.5	{'submit': 0.66, 'commit': 0.03, '': 0.01, 'send': 0.01, 'res': 0.01}	4	0.00692749	0.657135	0.99996	context	context|target	0.52	TRUE	TRUE	TRUE	target	{'resubmit': 0.52, 'submit': 0.47}
Morphological Modifiers	noun+less_reg	god is to godless as law is to	lawless	law	0.65	0.5	0.5	{'law': 0.65, '______': 0.02, '____': 0.02, 'an': 0.02, '_____': 0.02}	0	0.648438	0	1	context	context|target	0.52	TRUE	TRUE	TRUE	target	{'lawless': 0.52, 'law': 0.49}
Factual Knowledge	capital_world	Syria is to Damascus as Uganda is to	kampala	Kamp	0.6	0.5	0.5	{'Kamp': 0.6, '______': 0.06, '__': 0.04, 'what': 0.02, '...': 0.02}	0	0.601562	0	1	context	context|target	0.52	TRUE	TRUE	TRUE	target	{'kampala': 0.52, 'uganda': 0.48}
Morphological Modifiers	noun+less_reg	god is to godless as guilt is to	guiltless	guilt	0.58	0.5	0.5	{'guilt': 0.58, 'innocent': 0.09, 'innocence': 0.07, 'guilty': 0.03, '______': 0.02}	0	0.578125	0	1	context	context|target	0.52	TRUE	TRUE	TRUE	target	{'guiltless': 0.52, 'guilt': 0.46}
Factual Knowledge	country_capital	Greece is to Athens as Serbia is to	belgrade	Bel	0.57	0.5	0.5	{'Bel': 0.57, '__': 0.04, '______': 0.04, '...': 0.03, '': 0.02}	0	0.566406	0	1	context	context|target	0.52	TRUE	TRUE	TRUE	target	{'belgrade': 0.52, 'serbia': 0.5}
Factual Knowledge	capital_world	Greece is to Athens as Serbia is to	belgrade	Bel	0.57	0.5	0.5	{'Bel': 0.57, '__': 0.04, '______': 0.04, '...': 0.03, '': 0.02}	0	0.566406	0	1	context	context|target	0.52	TRUE	TRUE	TRUE	target	{'belgrade': 0.52, 'serbia': 0.5}
Morphological Modifiers	re+verb_reg	publish is to republish as tell is to	retell	tell	0.57	0	0.5	{'tell': 0.57, 'ret': 0.04, 'say': 0.03, 'inform': 0.02, 'command': 0.01}	1	0.0412598	0.529053	0.99999	context	context|target	0.52	TRUE	TRUE	TRUE	target	{'retell': 0.52, 'tell': 0.5}
Morphological Modifiers	verb+able_reg	execute is to executable as write is to	writeable	writable	0.56	0	0.5	{'writable': 0.56, 'write': 0.04, 'file': 0.03, 'text': 0.03, 'readable': 0.02}	1	0.0383301	0.52417	0.99999	context	context|target	0.52	TRUE	TRUE	TRUE	target	{'writeable': 0.52, 'write': 0.47}
Morphological Modifiers	re+verb_reg	assign is to reassign as publish is to	republish	publish	0.5	0	0.5	{'publish': 0.5, 'subscribe': 0.15, 'commit': 0.01, 'unsubscribe': 0.01, 'rep': 0.01}	4	0.0107422	0.493164	0.99996	context	context|target	0.52	TRUE	TRUE	TRUE	target	{'republish': 0.52, 'publish': 0.51}
Morphological Modifiers	adj_superlative	huge is to hugest as weird is to	weirdest	weir	0.49	0.5	0.5	{'weir': 0.49, '______': 0.04, 'weird': 0.03, 'we': 0.02, 'w': 0.01}	0	0.492188	0	1	context	context|target	0.52	TRUE	TRUE	TRUE	target	{'weirdest': 0.52, 'weird': 0.47}
Morphological Modifiers	verb+able_reg	recommend is to recommendable as replace is to	replaceable	replace	0.49	0.5	0.5	{'replace': 0.49, 'repl': 0.06, '': 0.03, '?': 0.03}	0	0.490234	0	1	context	context|target	0.52	TRUE	TRUE	TRUE	target	{'replaceable': 0.52, 'replace': 0.5}
Verbal & Grammatical Forms	verb_Ving_3pSg	appearing is to appears as becoming is to	becomes	become	0.48	0.5	0.5	{'become': 0.48, 'be': 0.13, 'appear': 0.05, 'becoming': 0.05, 'being': 0.04}	5	0.0368652	0.44165	0.99995	context	context|target	0.52	TRUE	TRUE	TRUE	target	{'becomes': 0.52, 'becoming': 0.48}
Morphological Modifiers	adj+ness_reg	hot is to hotness as massive is to	massiveness	mass	0.46	0.5	0.5	{'mass': 0.46, '______': 0.06, 'what': 0.05, 'massive': 0.04, 'heav': 0.02}	0	0.460938	0	1	context	context|target	0.52	TRUE	TRUE	TRUE	target	{'massiveness': 0.52, 'massive': 0.5}
Factual Knowledge	capital_world	Denmark is to Copenhagen as Zimbabwe is to	harare	Har	0.44	0.5	0.5	{'Har': 0.44, '______': 0.07, '__': 0.03, '_____': 0.03, 'what': 0.02}	0	0.435547	0	1	context	context|target	0.52	TRUE	TRUE	TRUE	target	{'harare': 0.52, 'zimbabwe': 0.48}
Factual Knowledge	capital_world	Malta is to Valletta as Laos is to	vientiane	V	0.4	0.5	0.5	{'V': 0.4, '__': 0.05, 'what': 0.04, '"': 0.04, '______': 0.03}	79	0.00102997	0.401314	0.999213	context	context|target	0.52	TRUE	TRUE	TRUE	target	{'vientiane': 0.52, 'laos': 0.51}
Morphological Modifiers	verb+able_reg	recognize is to recognizable as replace is to	replaceable	replace	0.37	0.5	0.5	{'replace': 0.37, '': 0.05, '__': 0.03}	0	0.373047	0	1	context	context|target	0.52	TRUE	TRUE	TRUE	target	{'replaceable': 0.52, 'replace': 0.5}
Factual Knowledge	capital_world	Denmark is to Copenhagen as Somalia is to	mogadishu	Mog	0.34	0.5	0.5	{'Mog': 0.34, '______': 0.08, '__': 0.05, '_____': 0.04, '____': 0.03}	0	0.341797	0	1	context	context|target	0.52	TRUE	TRUE	TRUE	target	{'mogadishu': 0.52, 'somalia': 0.47}
Morphological Modifiers	adj+ness_reg	hot is to hotness as nice is to	niceness	nic	0.34	0.5	0.5	{'nic': 0.34, '______': 0.06, 'what': 0.05, '"': 0.04, '_': 0.02}	0	0.335938	0	1	context	context|target	0.52	TRUE	TRUE	TRUE	target	{'niceness': 0.52, 'nice': 0.47}
Factual Knowledge	capital_world	England is to London as Cyprus is to	nicosia	N	0.33	0.5	0.5	{'N': 0.33, '______': 0.07, '__': 0.07, 'what': 0.07, 'Lim': 0.06}	221	0.000103474	0.331928	0.997798	context	context|target	0.52	TRUE	TRUE	TRUE	target	{'nicosia': 0.52, 'cyprus': 0.49}
Factual Knowledge	capital_world	Denmark is to Copenhagen as Zambia is to	lusaka	L	0.33	0.5	0.5	{'L': 0.33, '__': 0.05, '______': 0.04, '_____': 0.04, '____': 0.03}	153	0.000314713	0.33367	0.998475	context	context|target	0.52	TRUE	TRUE	TRUE	target	{'lusaka': 0.52, 'zambia': 0.48}
Morphological Modifiers	adj_superlative	cruel is to cruelest as strict is to	strictest	strict	0.33	0.5	0.5	{'strict': 0.33, '______': 0.07, '"': 0.04, '__': 0.03, '____': 0.02}	0	0.326172	0	1	context	context|target	0.52	TRUE	TRUE	TRUE	target	{'strictest': 0.52, 'strict': 0.49}
Factual Knowledge	capital_world	Denmark is to Copenhagen as Sudan is to	khartoum	Kh	0.32	0.5	0.5	{'Kh': 0.32, '______': 0.06, '__': 0.05, '_____': 0.04, '____': 0.04}	0	0.316406	0	1	context	context|target	0.52	TRUE	TRUE	TRUE	target	{'khartoum': 0.52, 'sudan': 0.47}
Morphological Modifiers	adj_comparative	huge is to huger as rude is to	ruder	r	0.32	0.5	0.5	{'r': 0.32, '______': 0.12, 'rud': 0.03, '____': 0.03, '__': 0.03}	2	0.0332031	0.283203	0.99998	context	context|target	0.52	TRUE	TRUE	TRUE	target	{'ruder': 0.52, 'rude': 0.48}
Factual Knowledge	capital_world	Denmark is to Copenhagen as Rwanda is to	kigali	K	0.31	0.5	0.5	{'K': 0.31, '______': 0.08, '_____': 0.05, '__': 0.04, '____': 0.03}	377	6.67572e-05	0.308527	0.996243	context	context|target	0.52	TRUE	TRUE	TRUE	target	{'kigali': 0.52, 'rwanda': 0.48}
Factual Knowledge	capital_world	Laos is to Vientiane as Algeria is to	algiers	Alg	0.3	0.5	0.5	{'Alg': 0.3, '__': 0.06, '______': 0.04, ':': 0.04, '': 0.03}	0	0.304688	0	1	context	context|target	0.52	TRUE	TRUE	TRUE	target	{'algiers': 0.52, 'algeria': 0.49}
Factual Knowledge	capital_world	Syria is to Damascus as Mozambique is to	maputo	Map	0.3	0.5	0.5	{'Map': 0.3, '__': 0.12, '______': 0.05, 'what': 0.03, '_____': 0.02}	0	0.302734	0	1	context	context|target	0.52	TRUE	TRUE	TRUE	target	{'maputo': 0.52, 'mozambique': 0.48}
Morphological Modifiers	adj_comparative	huge is to huger as tricky is to	trickier	trick	0.3	0.5	0.5	{'trick': 0.3, '______': 0.1, 'tr': 0.1, '__': 0.05, 'what': 0.02}	0	0.302734	0	1	context	context|target	0.52	TRUE	TRUE	TRUE	target	{'trickier': 0.52, 'tricky': 0.5}
Morphological Modifiers	adj_comparative	vague is to vaguer as weird is to	weirder	weir	0.3	0.5	0.5	{'weir': 0.3, '______': 0.14, '__': 0.05, '____': 0.04, '_____': 0.04}	0	0.296875	0	1	context	context|target	0.52	TRUE	TRUE	TRUE	target	{'weirder': 0.52, 'weird': 0.47}
Morphological Modifiers	adj_comparative	happier is to happy as hardier is to	hardy	hard	0.29	0.5	0.5	{'hard': 0.29, '______': 0.07, '_____': 0.04, 'strong': 0.03, '"': 0.03}	238	0.00023365	0.290782	0.997628	context	context|target	0.52	TRUE	TRUE	TRUE	target	{'hardy': 0.52, 'hardier': 0.49}
Morphological Modifiers	noun+less_reg	god is to godless as sensor is to	sensorless	sens	0.27	0.5	0.5	{'sens': 0.27, 'sensor': 0.21, 'sensory': 0.07, 'sense': 0.04, 'insensitive': 0.02}	0	0.273438	0	1	context	context|target	0.52	TRUE	TRUE	TRUE	target	{'sensorless': 0.52, 'sensor': 0.48}
Verbal & Grammatical Forms	verb_Ving_3pSg	developing is to develops as losing is to	loses	win	0.27	0	0.5	{'win': 0.27, 'gain': 0.17, 'wins': 0.08, 'gains': 0.07, 'lose': 0.02}	15	0.00753784	0.258087	0.999851	context	context|target	0.52	TRUE	TRUE	TRUE	target	{'loses': 0.52, 'losing': 0.48}
Factual Knowledge	capital_world	England is to London as Ecuador is to	quito	______	0.25	0	0.5	{'______': 0.25, 'Q': 0.16, '__': 0.15, 'what': 0.05, '_____': 0.04}	922	6.82473e-06	0.246087	0.990812	context	context|target	0.52	TRUE	TRUE	TRUE	target	{'quito': 0.52, 'ecuador': 0.49}
Morphological Modifiers	re+verb_reg	define is to redefine as marry is to	remarry	marry	0.25	0	0.5	{'marry': 0.25, 'rem': 0.17, 'divorce': 0.1, 'wed': 0.06, 'un': 0.04}	1	0.171875	0.078125	0.99999	context	context|target	0.52	TRUE	TRUE	TRUE	target	{'remarry': 0.52, 'marry': 0.49}
Morphological Modifiers	re+verb_reg	configure is to reconfigure as negotiate is to	renegotiate	negotiate	0.24	0	0.5	{'negotiate': 0.24, 'renegot': 0.11, '': 0.02, 'negotiation': 0.02}	1	0.106445	0.133789	0.99999	context	context|target	0.52	TRUE	TRUE	TRUE	target	{'renegotiate': 0.52, 'negotiate': 0.48}
Verbal & Grammatical Forms	verb_3pSg_Ved	became is to becomes as married is to	marries	mar	0.21	0.5	0.5	{'mar': 0.21, 'married': 0.16, 'becomes': 0.06, '______': 0.06, 'marriage': 0.05}	0	0.205078	0	1	context	context|target	0.52	TRUE	TRUE	TRUE	target	{'marries': 0.52, 'married': 0.47}
Morphological Modifiers	adj_superlative	cruel is to cruelest as weird is to	weirdest	weir	0.2	0.5	0.5	{'weir': 0.2, '______': 0.15, '____': 0.07, '_____': 0.05, '"': 0.04}	0	0.195312	0	1	context	context|target	0.52	TRUE	TRUE	TRUE	target	{'weirdest': 0.52, 'weird': 0.48}
Morphological Modifiers	adj_comparative	huge is to huger as ugly is to	uglier	ug	0.2	0.5	0.5	{'ug': 0.2, '______': 0.1, '__': 0.05, '____': 0.03, 'u': 0.02}	0	0.198242	0	1	context	context|target	0.52	TRUE	TRUE	TRUE	target	{'uglier': 0.52, 'ugly': 0.49}
Semantic Relations	male_female	god is to goddess as poet is to	poetess	poet	0.2	0.5	0.5	{'poet': 0.2, '______': 0.05, '____': 0.04, 'writer': 0.04, 'muse': 0.03}	0	0.199219	0	1	context	context|target	0.52	TRUE	TRUE	TRUE	target	{'poetess': 0.52, 'poet': 0.48}
Morphological Modifiers	adj_comparative	huge is to huger as hungry is to	hungrier	hung	0.19	0.5	0.5	{'hung': 0.19, 'hug': 0.15, 'hunger': 0.14, '______': 0.11, '__': 0.03}	0	0.186523	0	1	context	context|target	0.52	TRUE	TRUE	TRUE	target	{'hungrier': 0.52, 'hungry': 0.49}
Morphological Modifiers	verb+ment_irreg	equip is to equipment as fulfil is to	fulfilment	fulfil	0.19	0.5	0.5	{'fulfil': 0.19, 'fulfillment': 0.07, '__': 0.07, 'fulfill': 0.07, '____': 0.06}	0	0.194336	0	1	context	context|target	0.52	TRUE	TRUE	TRUE	target	{'fulfilment': 0.52, 'fulfil': 0.48}
Verbal & Grammatical Forms	plural	woman is to women as eagle is to	eagles	birds	0.19	0	0.5	{'birds': 0.19, 'eag': 0.16, 'what': 0.07, 'bird': 0.04, 'a': 0.03}	37	0.00421143	0.187195	0.999631	context	context|target	0.52	TRUE	TRUE	TRUE	target	{'eagles': 0.52, 'eagle': 0.49}
Semantic Relations	animal_sound	chimpanzee is to scream as cricket is to	chirp	chir	0.18	0.5	0.5	{'chir': 0.18, 'sing': 0.06, '': 0.03, '___': 0.04}	0	0.177734	0	1	context	context|target	0.52	TRUE	TRUE	TRUE	target	{'chirp': 0.52, 'cricket': 0.49}
Verbal & Grammatical Forms	verb_Ving_3pSg	appearing is to appears as teaching is to	teaches	learn	0.18	0	0.5	{'learn': 0.18, 'appear': 0.14, 'teach': 0.1, 'be': 0.07, 'taught': 0.04}	11	0.00952148	0.170166	0.99989	context	context|target	0.52	TRUE	TRUE	TRUE	target	{'teaches': 0.52, 'teaching': 0.49}
Morphological Modifiers	adj+ness_reg	hot is to hotness as reasonable is to	reasonableness	reason	0.17	0.5	0.5	{'reason': 0.17, '______': 0.08, '"': 0.06, 'what': 0.05, '__': 0.03}	0	0.166016	0	1	context	context|target	0.52	TRUE	TRUE	TRUE	target	{'reasonableness': 0.52, 'reasonable': 0.46}
Morphological Modifiers	adj_comparative	angry is to angrier as cute is to	cuter	cut	0.17	0.5	0.5	{'cut': 0.17, '______': 0.14, '____': 0.05, '_____': 0.04, '__': 0.03}	0	0.168945	0	1	context	context|target	0.52	TRUE	TRUE	TRUE	target	{'cuter': 0.52, 'cute': 0.49}
Verbal & Grammatical Forms	verb_inf_3pSg	achieve is to achieves as maintain is to	maintains	maintain	0.17	0.5	0.5	{'maintain': 0.17, '': 0.06, '______': 0.06, '_____': 0.03}	8	0.0209961	0.144043	0.99992	context	context|target	0.52	TRUE	TRUE	TRUE	target	{'maintains': 0.52, 'maintain': 0.48}
Morphological Modifiers	adj_superlative	cruel is to cruelest as handy is to	handiest	______	0.16	0	0.5	{'______': 0.16, 'hand': 0.14, '__': 0.05, '____': 0.04, '"': 0.02}	1	0.142578	0.0195312	0.99999	context	context|target	0.52	TRUE	TRUE	TRUE	target	{'handiest': 0.52, 'handy': 0.49}
Verbal & Grammatical Forms	verb_Ving_3pSg	appearing is to appears as learning is to	learns	learn	0.16	0.5	0.5	{'learn': 0.16, 'appear': 0.09, 'teach': 0.07, 'learned': 0.05, 'be': 0.04}	8	0.0195312	0.144531	0.99992	context	context|target	0.52	TRUE	TRUE	TRUE	target	{'learns': 0.52, 'learning': 0.49}
Verbal & Grammatical Forms	verb_inf_3pSg	achieve is to achieves as create is to	creates		0.16	0	0.5	{'': 0.06, 'create': 0.08, '______': 0.03, '__': 0.03}	5	0.029541	0.129639	0.99995	context	context|target	0.52	TRUE	TRUE	TRUE	target	{'creates': 0.52, 'create': 0.49}
Morphological Modifiers	noun+less_reg	art is to artless as spine is to	spineless	spine	0.14	0.5	0.5	{'spine': 0.14, '______': 0.06, '__': 0.03, 'vert': 0.03, 'sp': 0.03}	0	0.142578	0	1	context	context|target	0.52	TRUE	TRUE	TRUE	target	{'spineless': 0.52, 'spine': 0.49}
Morphological Modifiers	verb+er_irreg	follow is to follower as organise is to	organiser	organ	0.14	0.5	0.5	{'organ': 0.14, '': 0.03, '?': 0.04, 'organisation': 0.04}	0	0.138672	0	1	context	context|target	0.52	TRUE	TRUE	TRUE	target	{'organiser': 0.52, 'organise': 0.5}
Verbal & Grammatical Forms	verb_inf_3pSg	achieve is to achieves as understand is to	understands		0.14	0	0.5	{'': 0.06, 'understand': 0.11, '______': 0.04, ':': 0.03}	8	0.026123	0.115479	0.99992	context	context|target	0.52	TRUE	TRUE	TRUE	target	{'understands': 0.52, 'understand': 0.47}
Verbal & Grammatical Forms	verb_inf_3pSg	follow is to follows as provide is to	provides		0.14	0	0.5	{'': 0.04, '?': 0.07, 'provide': 0.04}	12	0.013855	0.125793	0.99988	context	context|target	0.52	TRUE	TRUE	TRUE	target	{'provides': 0.52, 'provide': 0.49}
Morphological Modifiers	adj_superlative	cruel is to cruelest as fierce is to	fiercest	fier	0.13	0.5	0.5	{'fier': 0.13, '______': 0.1, '__': 0.06, '____': 0.05, 'fierce': 0.04}	0	0.128906	0	1	context	context|target	0.52	TRUE	TRUE	TRUE	target	{'fiercest': 0.52, 'fierce': 0.5}
Morphological Modifiers	adj_comparative	scary is to scarier as sunny is to	sunnier	______	0.13	0	0.5	{'______': 0.13, 'sunny': 0.05, '_____': 0.03, 'what': 0.03, 'sun': 0.03}	4	0.03125	0.100586	0.99996	context	context|target	0.52	TRUE	TRUE	TRUE	target	{'sunnier': 0.52, 'sunny': 0.48}
Verbal & Grammatical Forms	verb_Ving_3pSg	developing is to develops as managing is to	manages	______	0.12	0	0.5	{'______': 0.12, 'manage': 0.07, '': 0.07, '__': 0.05, '?': 0.04}	5	0.0373535	0.0778809	0.99995	context	context|target	0.52	TRUE	TRUE	TRUE	target	{'manages': 0.52, 'managing': 0.49}
Morphological Modifiers	adj_comparative	coarse is to coarser as dense is to	denser	______	0.11	0	0.5	{'______': 0.11, 'dens': 0.05, '"': 0.05, '?"': 0.03, '_____': 0.02}	1	0.0495605	0.0622559	0.99999	context	context|target	0.52	TRUE	TRUE	TRUE	target	{'denser': 0.52, 'dense': 0.49}
Morphological Modifiers	verb+tion_irreg	compile is to compilation as reorganize is to	reorganization	organization	0.11	0	0.5	{'organization': 0.11, '______': 0.11, '__': 0.07, 're': 0.07, '____': 0.05}	2	0.0683594	0.0439453	0.99998	context	context|target	0.52	TRUE	TRUE	TRUE	target	{'reorganization': 0.52, 'reorganize': 0.47}
Morphological Modifiers	adj_superlative	dumb is to dumbest as healthy is to	healthiest	health	0.1	0.5	0.5	{'health': 0.1, 'healthy': 0.09, '______': 0.08, 'sick': 0.04, 'what': 0.04}	0	0.100586	0	1	context	context|target	0.52	TRUE	TRUE	TRUE	target	{'healthiest': 0.52, 'healthy': 0.51}
Morphological Modifiers	verb+tion_irreg	illumine is to illumination as minimize is to	minimization	minim	0.1	0.5	0.5	{'minim': 0.1, '______': 0.09, 'minimum': 0.07, '': 0.07, '__': 0.06}	0	0.097168	0	1	context	context|target	0.52	TRUE	TRUE	TRUE	target	{'minimization': 0.52, 'minimize': 0.5}
Semantic Relations	animal_sound	songbird is to chirrup as turkey is to	gobble	gob	0.1	0.5	0.5	{'gob': 0.1, '': 0.07, 'what': 0.06, '______': 0.05}	0	0.0976562	0	1	context	context|target	0.52	TRUE	TRUE	TRUE	target	{'gobble': 0.52, 'turkey': 0.48}
Semantic Relations	antonyms_binary	out is to in as outbound is to	inbound	in	0.1	0.5	0.5	{'in': 0.1, 'out': 0.08, '': 0.07, '_____': 0.06, '?': 0.04}	81	0.00101471	0.102013	0.999193	context	context|target	0.52	TRUE	TRUE	TRUE	target	{'inbound': 0.52, 'outbound': 0.5}
Factual Knowledge	capital_world	Vietnam is to Hanoi as Mauritania is to	nouakchott	__	0.09	0	0.5	{'__': 0.09, '______': 0.06, 'Nou': 0.05, 'A': 0.04, '_____': 0.04}	2	0.048584	0.0422363	0.99998	context	context|target	0.52	TRUE	TRUE	TRUE	target	{'nouakchott': 0.52, 'mauritania': 0.5}
Morphological Modifiers	verb+tion_irreg	authorize is to authorization as minimize is to	minimization	minim	0.09	0.5	0.5	{'minim': 0.09, '': 0.06, '______': 0.06, '__': 0.06}	0	0.0883789	0	1	context	context|target	0.52	TRUE	TRUE	TRUE	target	{'minimization': 0.52, 'minimize': 0.49}
Semantic Relations	animal_sound	goat is to bleat as mallard is to	quack	qu	0.09	0.5	0.5	{'qu': 0.09, '______': 0.06, '': 0.04, '?': 0.05}	0	0.0922852	0	1	context	context|target	0.52	TRUE	TRUE	TRUE	target	{'quack': 0.52, 'mallard': 0.5}
Verbal & Grammatical Forms	verb_Ving_3pSg	developing is to develops as learning is to	learns	learn	0.09	0.5	0.5	{'learn': 0.09, 'develop': 0.05, 'teach': 0.04, '______': 0.04, '__': 0.04}	58	0.0027771	0.0836487	0.999422	context	context|target	0.52	TRUE	TRUE	TRUE	target	{'learns': 0.52, 'learning': 0.47}
Verbal & Grammatical Forms	noun_plural_irreg	datum is to data as majority is to	majorities	major	0.09	0.5	0.5	{'major': 0.09, '______': 0.07, '__': 0.06, 'majority': 0.05, 'vote': 0.05}	0	0.0898438	0	1	context	context|target	0.52	TRUE	TRUE	TRUE	target	{'majorities': 0.52, 'majority': 0.49}
Morphological Modifiers	adj+ly_reg	immediately is to immediate as successfully is to	successful	successfully	0.08	0	0.5	{'successfully': 0.08, '______': 0.07, 'success': 0.07, '__': 0.06, '': 0.04}	12	0.0164795	0.0621338	0.99988	context	context|target	0.52	TRUE	TRUE	TRUE	target	{'successful': 0.52, 'successfully': 0.49}
Verbal & Grammatical Forms	verb_inf_3pSg	continue is to continues as protect is to	protects	______	0.08	0	0.5	{'______': 0.08, '__': 0.06, '': 0.05, 'protect': 0.05, '?': 0.03}	7	0.026001	0.0540771	0.99993	context	context|target	0.52	TRUE	TRUE	TRUE	target	{'protects': 0.52, 'protect': 0.48}
Verbal & Grammatical Forms	verb_inf_3pSg	continue is to continues as improve is to	improves		0.08	0	0.5	{'': 0.08, 'improve': 0.07, '______': 0.06, 'enhance': 0.04, '__': 0.04}	33	0.00457764	0.0720825	0.999671	context	context|target	0.52	TRUE	TRUE	TRUE	target	{'improves': 0.52, 'improve': 0.48}
Morphological Modifiers	adj_superlative	healthiest is to healthy as hugest is to	huge	hug	0.05	0.5	0.5	{'hug': 0.05, 'big': 0.05, '______': 0.04, ':': 0.04, '"': 0.04}	6	0.0371094	0.0168457	0.99994	context	context|target	0.52	TRUE	TRUE	TRUE	target	{'huge': 0.52, 'hugest': 0.49}
Morphological Modifiers	noun+less_reg	god is to godless as mirth is to	mirthless	______	0.05	0	0.5	{'______': 0.05, '?': 0.05, 'm': 0.05, '__': 0.04, 'merry': 0.04}	566	0.00011301	0.0540862	0.99436	context	context|target	0.52	TRUE	TRUE	TRUE	target	{'mirthless': 0.52, 'mirth': 0.45}
Morphological Modifiers	re+verb_reg	connect is to reconnect as publish is to	republish	subscribe	0.83	0	0	{'subscribe': 0.83, 'publish': 0.08, 'pub': 0.03, 'connect': 0.01, 'push': 0.0}	14	0.000663757	0.831367	0.99986	context	context|target	0.52	TRUE	TRUE	TRUE	target	{'republish': 0.52, 'publish': 0.48}
Morphological Modifiers	re+verb_reg	publish is to republish as send is to	resend	send	0.76	0	0	{'send': 0.76, 'sent': 0.03, 'transmit': 0.02, 'deliver': 0.02, 'mail': 0.02}	6	0.0108643	0.750854	0.99994	context	context|target	0.52	TRUE	TRUE	TRUE	target	{'resend': 0.52, 'send': 0.48}
Morphological Modifiers	re+verb_reg	commend is to recommend as publish is to	republish	publish	0.57	0	0	{'publish': 0.57, 'accept': 0.02, 'approve': 0.02, 'reject': 0.01, 'print': 0.01}	21	0.00338745	0.566925	0.999791	context	context|target	0.52	TRUE	TRUE	TRUE	target	{'republish': 0.52, 'publish': 0.49}
Morphological Modifiers	re+verb_reg	connect is to reconnect as create is to	recreate	create	0.5	0	0	{'create': 0.5, 'connect': 0.13, 'destroy': 0.05, 'new': 0.03, 'construct': 0.03}	7	0.0116577	0.484436	0.99993	context	context|target	0.52	TRUE	TRUE	TRUE	target	{'recreate': 0.52, 'create': 0.48}
Verbal & Grammatical Forms	verb_Ving_3pSg	believes is to believing as requires is to	requiring	requires	0.5	0	0	{'requires': 0.5, 'requirement': 0.03, 'necess': 0.03, 'required': 0.03, 'necessity': 0.03}	7	0.010437	0.493469	0.99993	context	context|target	0.52	TRUE	TRUE	TRUE	target	{'requiring': 0.52, 'requires': 0.51}
Morphological Modifiers	re+verb_reg	publish is to republish as upload is to	reupload	upload	0.48	0	0	{'upload': 0.48, 'download': 0.12, 'save': 0.03, 'publish': 0.02, 'store': 0.01}	25	0.00454712	0.472015	0.999751	context	context|target	0.52	TRUE	TRUE	TRUE	target	{'reupload': 0.52, 'upload': 0.48}
Morphological Modifiers	re+verb_reg	emerge is to reemerge as tell is to	retell	tell	0.48	0	0	{'tell': 0.48, '': 0.03, '__': 0.02, '____': 0.02, '______': 0.02}	6	0.0186768	0.461792	0.99994	context	context|target	0.52	TRUE	TRUE	TRUE	target	{'retell': 0.52, 'tell': 0.49}
Morphological Modifiers	re+verb_reg	emerge is to reemerge as install is to	reinstall	emerge	0.47	0	0	{'emerge': 0.47, 'merge': 0.11, 'install': 0.04, 'un': 0.03, 'em': 0.03}	8	0.0111694	0.46344	0.99992	context	context|target	0.52	TRUE	TRUE	TRUE	target	{'reinstall': 0.52, 'install': 0.47}
Semantic Relations	animal_sound	chirp is to cricket as sing is to	whale	bird	0.41	0	0	{'bird': 0.41, 'song': 0.21, 'human': 0.15, 'sing': 0.03, 'birds': 0.01}	27	0.00162506	0.408531	0.999731	context	context|target	0.52	TRUE	TRUE	TRUE	target	{'whale': 0.52, 'sing': 0.47}
Morphological Modifiers	re+verb_reg	reconfigure is to configure as reintegrate is to	integrate	merge	0.4	0	0	{'merge': 0.4, 'reint': 0.35, 're': 0.06, 'resolve': 0.04, 'switch': 0.01}	8	0.00549316	0.392944	0.99992	context	context|target	0.52	TRUE	TRUE	TRUE	target	{'integrate': 0.52, 'reintegrate': 0.47}
Semantic Relations	animal_sound	magpie is to chatter as songbird is to	chirrup	sing	0.37	0	0	{'sing': 0.37, '______': 0.04, '__': 0.04, '': 0.04, '_____': 0.04}	20	0.0072937	0.365753	0.999801	context	context|target	0.52	TRUE	TRUE	TRUE	target	{'chirrup': 0.52, 'songbird': 0.48}
Morphological Modifiers	adj+ly_reg	globally is to global as virtually is to	virtual	virtually	0.34	0	0	{'virtually': 0.34, 'locally': 0.1, '______': 0.09, '__': 0.04, 'globally': 0.03}	7	0.0233154	0.318481	0.99993	context	context|target	0.52	TRUE	TRUE	TRUE	target	{'virtual': 0.52, 'virtually': 0.5}
Verbal & Grammatical Forms	verb_Ving_Ved	existed is to existing as lost is to	losing	found	0.34	0	0	{'found': 0.34, 'finding': 0.13, 'lost': 0.12, 'being': 0.04, 'find': 0.04}	5	0.0275879	0.30835	0.99995	context	context|target	0.52	TRUE	TRUE	TRUE	target	{'losing': 0.52, 'lost': 0.46}
Morphological Modifiers	re+verb_reg	apply is to reapply as emerge is to	reemerge	emerge	0.28	0	0	{'emerge': 0.28, 'build': 0.09, 'em': 0.07, 'make': 0.02, 'to': 0.02}	19	0.00427246	0.276978	0.999811	context	context|target	0.52	TRUE	TRUE	TRUE	target	{'reemerge': 0.52, 'emerge': 0.48}
Morphological Modifiers	adj_superlative	healthy is to healthiest as risky is to	riskiest	______	0.26	0	0	{'______': 0.26, '_____': 0.06, '__': 0.06, 'safest': 0.06, '____': 0.05}	24	0.00613403	0.253632	0.999761	context	context|target	0.52	TRUE	TRUE	TRUE	target	{'riskiest': 0.52, 'risky': 0.48}
Semantic Relations	animal_sound	goat is to bleat as wasp is to	buzz	sting	0.25	0	0	{'sting': 0.25, '______': 0.07, '__': 0.06, '': 0.04, '____': 0.03}	10	0.0220947	0.231812	0.9999	context	context|target	0.52	TRUE	TRUE	TRUE	target	{'buzz': 0.52, 'wasp': 0.47}
Morphological Modifiers	re+verb_reg	organize is to reorganize as publish is to	republish	publish	0.22	0	0	{'publish': 0.22, 'distribute': 0.05, 'print': 0.04, '?': 0.03, 'write': 0.03}	26	0.00665283	0.21405	0.999741	context	context|target	0.52	TRUE	TRUE	TRUE	target	{'republish': 0.52, 'publish': 0.5}
Morphological Modifiers	re+verb_reg	commend is to recommend as connect is to	reconnect	connect	0.22	0	0	{'connect': 0.22, 'link': 0.05, 'join': 0.04, 'disconnect': 0.04, 'introduce': 0.04}	21	0.00482178	0.213928	0.999791	context	context|target	0.52	TRUE	TRUE	TRUE	target	{'reconnect': 0.52, 'connect': 0.47}
Verbal & Grammatical Forms	verb_Ving_3pSg	reduces is to reducing as requires is to	requiring	requires	0.22	0	0	{'requires': 0.22, '': 0.03, '"': 0.04, '______': 0.03}	9	0.0179443	0.199829	0.99991	context	context|target	0.52	TRUE	TRUE	TRUE	target	{'requiring': 0.52, 'requires': 0.51}
Verbal & Grammatical Forms	verb_inf_3pSg	agree is to agrees as maintain is to	maintains		0.22	0	0	{'': 0.13, '?': 0.06, ':': 0.04}	17	0.00866699	0.214966	0.999831	context	context|target	0.52	TRUE	TRUE	TRUE	target	{'maintains': 0.52, 'maintain': 0.48}
Morphological Modifiers	verb+er_irreg	recommender is to recommend as subscriber is to	subscribe	subscriber	0.21	0	0	{'subscriber': 0.21, 'subscription': 0.05, 'recommend': 0.04, 'recommendation': 0.03, '?': 0.03}	5	0.0246582	0.181396	0.99995	context	context|target	0.52	TRUE	TRUE	TRUE	target	{'subscribe': 0.52, 'subscriber': 0.49}
Verbal & Grammatical Forms	verb_inf_3pSg	prevent is to prevents as represent is to	represents		0.21	0	0	{'': 0.04, '?': 0.09}	5	0.0266113	0.182373	0.99995	context	context|target	0.52	TRUE	TRUE	TRUE	target	{'represents': 0.52, 'represent': 0.48}
Morphological Modifiers	adj_superlative	healthy is to healthiest as subtle is to	subtlest	______	0.2	0	0	{'______': 0.2, '__': 0.06, '_____': 0.05, '____': 0.04, '': 0.03}	31	0.00460815	0.190704	0.999691	context	context|target	0.52	TRUE	TRUE	TRUE	target	{'subtlest': 0.52, 'subtle': 0.47}
Verbal & Grammatical Forms	verb_inf_Ving	follow is to following as maintain is to	maintaining		0.2	0	0	{'': 0.09, '?': 0.03, ':': 0.03}	13	0.0127563	0.186462	0.99987	context	context|target	0.52	TRUE	TRUE	TRUE	target	{'maintaining': 0.52, 'maintain': 0.48}
Morphological Modifiers	re+verb_reg	configure is to reconfigure as interpret is to	reinterpret	interpret	0.19	0	0	{'interpret': 0.19, 'understand': 0.05, 'translate': 0.04, 'interpreter': 0.03, '': 0.03}	10	0.0145874	0.174866	0.9999	context	context|target	0.52	TRUE	TRUE	TRUE	target	{'reinterpret': 0.52, 'interpret': 0.48}
Verbal & Grammatical Forms	verb_inf_Ved	decide is to decided as identify is to	identified		0.19	0	0	{'': 0.07, '?': 0.04, '______': 0.04, 'A': 0.04}	19	0.0109253	0.183411	0.999811	context	context|target	0.52	TRUE	TRUE	TRUE	target	{'identified': 0.52, 'identify': 0.49}
Verbal & Grammatical Forms	verb_inf_3pSg	achieve is to achieves as continue is to	continues		0.18	0	0	{'': 0.07, '__': 0.04, '______': 0.03, '"': 0.03}	11	0.0146484	0.164062	0.99989	context	context|target	0.52	TRUE	TRUE	TRUE	target	{'continues': 0.52, 'continue': 0.5}
Morphological Modifiers	adj_comparative	dense is to denser as vague is to	vaguer	______	0.17	0	0	{'______': 0.17, '': 0.05, 'clearer': 0.06, ':': 0.05}	99	0.000766754	0.170132	0.999013	context	context|target	0.52	TRUE	TRUE	TRUE	target	{'vaguer': 0.52, 'vague': 0.49}
Morphological Modifiers	adj+ly_reg	extensively is to extensive as virtually is to	virtual	______	0.17	0	0	{'______': 0.17, 'virtually': 0.12, '__': 0.05, '': 0.04, '____': 0.04}	9	0.0252686	0.139771	0.99991	context	context|target	0.52	TRUE	TRUE	TRUE	target	{'virtual': 0.52, 'virtually': 0.51}
Morphological Modifiers	verb+er_irreg	follow is to follower as teach is to	teacher	student	0.17	0	0	{'student': 0.17, '_____': 0.06, 'learner': 0.06, '?': 0.05, '______': 0.04}	7	0.0279541	0.142944	0.99993	context	context|target	0.52	TRUE	TRUE	TRUE	target	{'teacher': 0.52, 'teach': 0.49}
Verbal & Grammatical Forms	verb_inf_3pSg	agree is to agrees as require is to	requires		0.17	0	0	{'': 0.09, '?': 0.05, ':': 0.05}	6	0.0300293	0.142822	0.99994	context	context|target	0.52	TRUE	TRUE	TRUE	target	{'requires': 0.52, 'require': 0.49}
Verbal & Grammatical Forms	noun_plural_irreg	economies is to economy as women is to	woman	men	0.17	0	0	{'men': 0.17, '______': 0.1, '__': 0.07, 'women': 0.03, 'man': 0.03}	32	0.00476074	0.163208	0.999681	context	context|target	0.52	TRUE	TRUE	TRUE	target	{'woman': 0.52, 'women': 0.49}
Semantic Hierarchies	hypernyms_misc	juicer is to utensil as pie is to	pastry	dessert	0.16	0	0	{'dessert': 0.16, 'food': 0.07, '': 0.05, '?': 0.05, '______': 0.03}	5	0.0299072	0.132202	0.99995	context	context|target	0.52	TRUE	TRUE	TRUE	target	{'pastry': 0.52, 'pie': 0.46}
Verbal & Grammatical Forms	verb_Ving_3pSg	promotes is to promoting as requires is to	requiring	requires	0.16	0	0	{'requires': 0.16, '': 0.06, 'demands': 0.04, '______': 0.03, 'necess': 0.03}	8	0.0192871	0.142822	0.99992	context	context|target	0.52	TRUE	TRUE	TRUE	target	{'requiring': 0.52, 'requires': 0.51}
Verbal & Grammatical Forms	noun_plural_irreg	strategies is to strategy as women is to	woman	men	0.16	0	0	{'men': 0.16, 'sex': 0.03, 'man': 0.03, 'women': 0.03, 'the': 0.02}	14	0.00634766	0.156738	0.99986	context	context|target	0.52	TRUE	TRUE	TRUE	target	{'woman': 0.52, 'women': 0.5}
Verbal & Grammatical Forms	verb_inf_Ving	performing is to perform as spending is to	spend	saving	0.16	0	0	{'saving': 0.16, 'save': 0.13, 'earning': 0.09, 'earn': 0.06, 'income': 0.04}	20	0.00668335	0.155426	0.999801	context	context|target	0.52	TRUE	TRUE	TRUE	target	{'spend': 0.52, 'spending': 0.5}
Verbal & Grammatical Forms	verb_inf_3pSg	maintain is to maintains as provide is to	provides		0.15	0	0	{'': 0.06, '______': 0.07, '_____': 0.05, '?': 0.05}	9	0.0218506	0.129517	0.99991	context	context|target	0.52	TRUE	TRUE	TRUE	target	{'provides': 0.52, 'provide': 0.49}
Verbal & Grammatical Forms	verb_inf_3pSg	improve is to improves as provide is to	provides		0.15	0	0	{'': 0.03, '?': 0.08}	9	0.0180664	0.133301	0.99991	context	context|target	0.52	TRUE	TRUE	TRUE	target	{'provides': 0.52, 'provide': 0.49}
Verbal & Grammatical Forms	verb_inf_3pSg	prevent is to prevents as seem is to	seems		0.15	0	0	{'': 0.15, '?': 0.09, '______': 0.06, '_____': 0.05, '__': 0.05}	27	0.00469971	0.141785	0.999731	context	context|target	0.52	TRUE	TRUE	TRUE	target	{'seems': 0.52, 'seem': 0.49}
Verbal & Grammatical Forms	noun_plural_irreg	duties is to duty as women is to	woman	love	0.15	0	0	{'love': 0.15, 'beauty': 0.06, 'pleasure': 0.04, 'duty': 0.04, 'children': 0.03}	12	0.012146	0.136292	0.99988	context	context|target	0.52	TRUE	TRUE	TRUE	target	{'woman': 0.52, 'women': 0.51}
Morphological Modifiers	adj_comparative	healthy is to healthier as nasty is to	nastier	______	0.14	0	0	{'______': 0.14, 'nicer': 0.05, '_': 0.05, '_____': 0.04, '__': 0.04}	50	0.00338745	0.140167	0.999502	context	context|target	0.52	TRUE	TRUE	TRUE	target	{'nastier': 0.52, 'nasty': 0.48}
Verbal & Grammatical Forms	verb_inf_3pSg	maintains is to maintain as sends is to	send	receives	0.14	0	0	{'receives': 0.14, 'maintains': 0.14, 'sends': 0.06, 'maintain': 0.04, 'receive': 0.03}	6	0.0198975	0.118774	0.99994	context	context|target	0.52	TRUE	TRUE	TRUE	target	{'send': 0.52, 'sends': 0.5}
Verbal & Grammatical Forms	verb_inf_Ving	follow is to following as spend is to	spending		0.14	0	0	{'': 0.06, '?': 0.06, 'earning': 0.05, 'saving': 0.05}	35	0.00476074	0.133911	0.999651	context	context|target	0.52	TRUE	TRUE	TRUE	target	{'spending': 0.52, 'spend': 0.49}
Morphological Modifiers	adj_superlative	mildest is to mild as strongest is to	strong	strongest	0.13	0	0	{'strongest': 0.13, '______': 0.08, '': 0.07, '_____': 0.05, 'weakest': 0.05}	19	0.00787354	0.123962	0.999811	context	context|target	0.52	TRUE	TRUE	TRUE	target	{'strong': 0.52, 'strongest': 0.49}
Morphological Modifiers	adj_superlative	cruel is to cruelest as hungry is to	hungriest	______	0.13	0	0	{'______': 0.13, 'hungry': 0.07, '_____': 0.05, '____': 0.05, '"': 0.04}	6	0.0371094	0.0917969	0.99994	context	context|target	0.52	TRUE	TRUE	TRUE	target	{'hungriest': 0.52, 'hungry': 0.48}
Morphological Modifiers	adj_superlative	handiest is to handy as nastiest is to	nasty	nic	0.13	0	0	{'nic': 0.13, 'pleasant': 0.13, '______': 0.04, 'lo': 0.03, 'nice': 0.02}	37	0.00379944	0.122177	0.999631	context	context|target	0.52	TRUE	TRUE	TRUE	target	{'nasty': 0.52, 'nastiest': 0.48}
Morphological Modifiers	verb+able_reg	adjust is to adjustable as foresee is to	foreseeable	?	0.12	0	0	{'?': 0.05, '': 0.06}	52	0.00228882	0.118805	0.999482	context	context|target	0.52	TRUE	TRUE	TRUE	target	{'foreseeable': 0.52, 'foresee': 0.48}
Morphological Modifiers	adj+ly_reg	environmentally is to environmental as seriously is to	serious	seriously	0.12	0	0	{'seriously': 0.12, '______': 0.08, '': 0.03, '__': 0.03}	13	0.0123901	0.105286	0.99987	context	context|target	0.52	TRUE	TRUE	TRUE	target	{'serious': 0.52, 'seriously': 0.5}
Verbal & Grammatical Forms	verb_Ving_3pSg	develops is to developing as publishes is to	publishing		0.12	0	0	{'': 0.12, '?': 0.05, '______': 0.05, '__': 0.04, '"': 0.03}	34	0.00567627	0.115417	0.999661	context	context|target	0.52	TRUE	TRUE	TRUE	target	{'publishing': 0.52, 'publishes': 0.48}
Morphological Modifiers	verb+able_reg	deliver is to deliverable as edit is to	editable		0.11	0	0	{'': 0.1, ':': 0.08, '_': 0.05, '?': 0.04}	15	0.0130615	0.0928955	0.999851	context	context|target	0.52	TRUE	TRUE	TRUE	target	{'editable': 0.52, 'edit': 0.48}
Morphological Modifiers	adj_comparative	happy is to happier as hungry is to	hungrier	______	0.11	0	0	{'______': 0.11, 'full': 0.06, '?': 0.05, 'hungry': 0.04, 'what': 0.04}	106	0.000793457	0.112976	0.998944	context	context|target	0.52	TRUE	TRUE	TRUE	target	{'hungrier': 0.52, 'hungry': 0.46}
Morphological Modifiers	verb+able_reg	advise is to advisable as execute is to	executable		0.11	0	0	{'': 0.07, ':': 0.08, '?': 0.05, '______': 0.04}	110	0.000827789	0.111477	0.998904	context	context|target	0.52	TRUE	TRUE	TRUE	target	{'executable': 0.52, 'execute': 0.49}
Morphological Modifiers	verb+er_irreg	receive is to receiver as teach is to	teacher		0.11	0	0	{'': 0.05, '?': 0.06, 'what': 0.05, ':': 0.05}	5	0.043457	0.0712891	0.99995	context	context|target	0.52	TRUE	TRUE	TRUE	target	{'teacher': 0.52, 'teach': 0.49}
Verbal & Grammatical Forms	verb_Ving_3pSg	involves is to involving as teaches is to	teaching		0.11	0	0	{'': 0.05, '______': 0.07, '_____': 0.06, '__': 0.05}	7	0.0209961	0.0927734	0.99993	context	context|target	0.52	TRUE	TRUE	TRUE	target	{'teaching': 0.52, 'teaches': 0.49}
Verbal & Grammatical Forms	verb_Ving_3pSg	improves is to improving as relates is to	relating		0.11	0	0	{'': 0.03, 'related': 0.06, '______': 0.06, '?': 0.03}	18	0.0111084	0.0943604	0.999821	context	context|target	0.52	TRUE	TRUE	TRUE	target	{'relating': 0.52, 'relates': 0.5}
Verbal & Grammatical Forms	verb_Ving_3pSg	improves is to improving as requires is to	requiring	requires	0.11	0	0	{'requires': 0.11, '': 0.1, '?': 0.06, '"': 0.04}	5	0.034668	0.0786133	0.99995	context	context|target	0.52	TRUE	TRUE	TRUE	target	{'requiring': 0.52, 'requires': 0.51}
Verbal & Grammatical Forms	verb_inf_Ving	follow is to following as improve is to	improving		0.11	0	0	{'': 0.05, '?': 0.03, 'what': 0.03}	197	0.000387192	0.107035	0.998037	context	context|target	0.52	TRUE	TRUE	TRUE	target	{'improving': 0.52, 'improve': 0.51}
Verbal & Grammatical Forms	verb_inf_Ving	encourage is to encouraging as improve is to	improving	improvement	0.11	0	0	{'improvement': 0.11, '______': 0.11, '': 0.04, '__': 0.05}	10	0.0213623	0.0870361	0.9999	context	context|target	0.52	TRUE	TRUE	TRUE	target	{'improving': 0.52, 'improve': 0.5}
Morphological Modifiers	adj_comparative	cute is to cuter as nasty is to	nastier	_	0.1	0	0	{'_': 0.1, '______': 0.06, ':': 0.06, '': 0.05}	58	0.00202942	0.0956268	0.999422	context	context|target	0.52	TRUE	TRUE	TRUE	target	{'nastier': 0.52, 'nasty': 0.47}
Morphological Modifiers	adj+ness_reg	madness is to mad as seriousness is to	serious	"	0.1	0	0	{'"': 0.1, '______': 0.07, 'seriousness': 0.03, '_____': 0.02, 'what': 0.02}	10	0.0183105	0.0808105	0.9999	context	context|target	0.52	TRUE	TRUE	TRUE	target	{'serious': 0.52, 'seriousness': 0.47}
Semantic Relations	animal_sound	baa is to sheep as chirrup is to	songbird	bird	0.1	0	0	{'bird': 0.1, '______': 0.08, 'birds': 0.06, '_____': 0.03, '____': 0.03}	84	0.0016861	0.102318	0.999163	context	context|target	0.52	TRUE	TRUE	TRUE	target	{'songbird': 0.52, 'chirrup': 0.51}
Verbal & Grammatical Forms	verb_Ving_3pSg	develops is to developing as manages is to	managing		0.1	0	0	{'': 0.1, '______': 0.09, '?': 0.05, '__': 0.04, '"': 0.03}	9	0.0212402	0.0803223	0.99991	context	context|target	0.52	TRUE	TRUE	TRUE	target	{'managing': 0.52, 'manages': 0.5}
Verbal & Grammatical Forms	verb_inf_3pSg	add is to adds as prevent is to	prevents		0.1	0	0	{'': 0.04, '_____': 0.05, 'subtract': 0.04, '?': 0.03}	7	0.0230713	0.0740967	0.99993	context	context|target	0.52	TRUE	TRUE	TRUE	target	{'prevents': 0.52, 'prevent': 0.5}
Verbal & Grammatical Forms	verb_inf_Ved	reduce is to reduced as replace is to	replaced	?	0.1	0	0	{'?': 0.04, '': 0.05, '"': 0.04, '?"': 0.04}	34	0.00482178	0.0986938	0.999661	context	context|target	0.52	TRUE	TRUE	TRUE	target	{'replaced': 0.52, 'replace': 0.5}
Verbal & Grammatical Forms	verb_inf_Ving	following is to follow as spending is to	spend	income	0.1	0	0	{'income': 0.1, 'saving': 0.07, 'earn': 0.07, 'be': 0.06, 'earning': 0.04}	16	0.00970459	0.0884399	0.999841	context	context|target	0.52	TRUE	TRUE	TRUE	target	{'spend': 0.52, 'spending': 0.49}
Morphological Modifiers	verb+able_reg	deliver is to deliverable as perform is to	performable		0.09	0	0	{'': 0.08, ':': 0.06, '"': 0.05, 'performance': 0.04}	47	0.00274658	0.0827026	0.999532	context	context|target	0.52	TRUE	TRUE	TRUE	target	{'performable': 0.52, 'perform': 0.46}
Morphological Modifiers	verb+ment_irreg	adjustment is to adjust as agreement is to	agree	disagreement	0.09	0	0	{'disagreement': 0.09, 'contract': 0.06, 'agreement': 0.05, 'understanding': 0.04, 'consent': 0.03}	45	0.00280762	0.0904541	0.999552	context	context|target	0.52	TRUE	TRUE	TRUE	target	{'agree': 0.52, 'agreement': 0.48}
Morphological Modifiers	adj_comparative	cheap is to cheaper as dense is to	denser	______	0.09	0	0	{'______': 0.09, '"': 0.04, ':': 0.03, '': 0.03, '?"': 0.03}	20	0.0153809	0.0788574	0.999801	context	context|target	0.52	TRUE	TRUE	TRUE	target	{'denser': 0.52, 'dense': 0.52}
Morphological Modifiers	re+verb_reg	reestablish is to establish as regenerate is to	generate	restore	0.09	0	0	{'restore': 0.09, 'make': 0.08, 'regenerate': 0.08, 'cause': 0.05, 'bring': 0.05}	9	0.0236816	0.0700684	0.99991	context	context|target	0.52	TRUE	TRUE	TRUE	target	{'generate': 0.52, 'regenerate': 0.5}
Verbal & Grammatical Forms	verb_inf_Ving	adding is to add as asking is to	ask	answer	0.09	0	0	{'answer': 0.09, 'question': 0.09, 'seek': 0.07, 'know': 0.05, 'get': 0.04}	8	0.0230713	0.0682373	0.99992	context	context|target	0.52	TRUE	TRUE	TRUE	target	{'ask': 0.52, 'asking': 0.49}
Verbal & Grammatical Forms	past_tense	spent is to spending as enhanced is to	enhancing	______	0.09	0	0	{'______': 0.09, 'what': 0.08, 'enhancement': 0.04, '__': 0.03, '': 0.02}	10	0.013916	0.0715332	0.9999	context	context|target	0.52	TRUE	TRUE	TRUE	target	{'enhancing': 0.52, 'enhanced': 0.5}
Verbal & Grammatical Forms	verb_Ving_Ved	agreeing is to agreed as hearing is to	heard	listening	0.09	0	0	{'listening': 0.09, '______': 0.06, 'listened': 0.04, '_____': 0.04, '__': 0.03}	12	0.0144043	0.0739746	0.99988	context	context|target	0.52	TRUE	TRUE	TRUE	target	{'heard': 0.52, 'hearing': 0.49}
Morphological Modifiers	verb+able_reg	deliver is to deliverable as write is to	writeable		0.08	0	0	{'': 0.07, ':': 0.05, '_': 0.05}	35	0.00610352	0.072998	0.999651	context	context|target	0.52	TRUE	TRUE	TRUE	target	{'writeable': 0.52, 'write': 0.47}
Morphological Modifiers	verb+able_reg	rely is to reliable as replace is to	replaceable		0.08	0	0	{'': 0.05, '?': 0.04, '______': 0.06}	8	0.0233154	0.0577393	0.99992	context	context|target	0.52	TRUE	TRUE	TRUE	target	{'replaceable': 0.52, 'replace': 0.49}
Morphological Modifiers	verb+able_reg	adjust is to adjustable as publish is to	publishable	?	0.08	0	0	{'?': 0.08, '______': 0.07, '': 0.07, '__': 0.05, 'what': 0.05}	18	0.0106201	0.0679932	0.999821	context	context|target	0.52	TRUE	TRUE	TRUE	target	{'publishable': 0.52, 'publish': 0.49}
Verbal & Grammatical Forms	verb_3pSg_Ved	develops is to developed as provides is to	provided		0.08	0	0	{'': 0.08, '?': 0.04, '______': 0.04, 'provides': 0.04, '"': 0.03}	6	0.03125	0.0488281	0.99994	context	context|target	0.52	TRUE	TRUE	TRUE	target	{'provided': 0.52, 'provides': 0.48}
Morphological Modifiers	verb+ment_irreg	commitment is to commit as development is to	develop	build	0.07	0	0	{'build': 0.07, 'produce': 0.07, 'deliver': 0.07, 'production': 0.04, 'evolve': 0.03}	20	0.00759888	0.0641785	0.999801	context	context|target	0.52	TRUE	TRUE	TRUE	target	{'develop': 0.52, 'development': 0.49}
Morphological Modifiers	verb+able_reg	adjust is to adjustable as execute is to	executable		0.07	0	0	{'': 0.05, ':': 0.07, 'what': 0.06, '?': 0.06}	20	0.0090332	0.0617676	0.999801	context	context|target	0.52	TRUE	TRUE	TRUE	target	{'executable': 0.52, 'execute': 0.49}
Verbal & Grammatical Forms	verb_inf_Ving	improve is to improving as remember is to	remembering	_____	0.07	0	0	{'_____': 0.07, '': 0.07, '?': 0.05, '______': 0.05}	5	0.0371094	0.0366211	0.99995	context	context|target	0.52	TRUE	TRUE	TRUE	target	{'remembering': 0.52, 'remember': 0.46}
Morphological Modifiers	re+verb_reg	organize is to reorganize as submit is to	resubmit	submit	0.06	0	0	{'submit': 0.06, '': 0.02, 'accept': 0.02, '__': 0.02}	21	0.00787354	0.053894	0.999791	context	context|target	0.52	TRUE	TRUE	TRUE	target	{'resubmit': 0.52, 'submit': 0.48}
Verbal & Grammatical Forms	verb_Ving_3pSg	develops is to developing as relates is to	relating	related	0.06	0	0	{'related': 0.06, '': 0.06, '______': 0.05, 'relation': 0.04, 'relationship': 0.04}	6	0.0286865	0.0362549	0.99994	context	context|target	0.52	TRUE	TRUE	TRUE	target	{'relating': 0.52, 'relates': 0.5}
Verbal & Grammatical Forms	past_tense	enhanced is to enhancing as took is to	taking		0.06	0	0	{'': 0.06, '______': 0.06, '____': 0.05, 'taken': 0.05, 'take': 0.04}	10	0.0250244	0.0389404	0.9999	context	context|target	0.52	TRUE	TRUE	TRUE	target	{'taking': 0.52, 'took': 0.46}
Verbal & Grammatical Forms	past_tense	spent is to spending as described is to	describing	described	0.06	0	0	{'described': 0.06, 'spent': 0.04, 'describe': 0.04, 'earned': 0.04, 'the': 0.03}	8	0.015564	0.0462036	0.99992	context	context|target	0.52	TRUE	TRUE	TRUE	target	{'describing': 0.52, 'described': 0.5}
Morphological Modifiers	verb+ment_irreg	assessment is to assess as excitement is to	excite	fear	0.05	0	0	{'fear': 0.05, 'assess': 0.04, 'be': 0.02, 'boredom': 0.02, 'excitement': 0.02}	5	0.0167236	0.0289307	0.99995	context	context|target	0.52	TRUE	TRUE	TRUE	target	{'excite': 0.52, 'excitement': 0.48}
Morphological Modifiers	verb+ment_irreg	development is to develop as excitement is to	excite	pleasure	0.04	0	0	{'pleasure': 0.04, 'fear': 0.04, 'be': 0.03, 'boredom': 0.03, 'joy': 0.02}	62	0.00234985	0.0393982	0.999382	context	context|target	0.52	TRUE	TRUE	TRUE	target	{'excite': 0.52, 'excitement': 0.48}
Verbal & Grammatical Forms	verb_inf_3pSg	contains is to contain as seems is to	seem	seem	0.99	1	1	{'seem': 0.99, 'be': 0.0, 'see': 0.0, 'seems': 0.0, 'appear': 0.0}	0	0.988281	0	1	context	context|target	0.51	TRUE	TRUE	TRUE	target	{'seem': 0.51, 'seems': 0.5}
Factual Knowledge	country_capital	Bern is to Switzerland as Canberra is to	australia	Australia	0.98	1	1	{'Australia': 0.98, 'the': 0.0, '': 0.0, 'A': 0.0}	0	0.976562	0	1	context	context|target	0.51	TRUE	TRUE	TRUE	target	{'australia': 0.51, 'canberra': 0.5}
Factual Knowledge	capital_world	Bern is to Switzerland as Canberra is to	australia	Australia	0.98	1	1	{'Australia': 0.98, 'the': 0.0, '': 0.0, 'A': 0.0}	0	0.976562	0	1	context	context|target	0.51	TRUE	TRUE	TRUE	target	{'australia': 0.51, 'canberra': 0.5}
Factual Knowledge	country_capital	Kingston is to Jamaica as Warsaw is to	poland	Poland	0.97	1	1	{'Poland': 0.97, 'the': 0.0, '': 0.0, 'Pol': 0.0}	0	0.96875	0	1	context	context|target	0.51	TRUE	TRUE	TRUE	target	{'poland': 0.51, 'warsaw': 0.49}
Factual Knowledge	capital_world	Valletta is to Malta as Warsaw is to	poland	Poland	0.97	1	1	{'Poland': 0.97, '': 0.0, 'the': 0.0, 'Europe': 0.0, 'Warsaw': 0.0}	0	0.972656	0	1	context	context|target	0.51	TRUE	TRUE	TRUE	target	{'poland': 0.51, 'warsaw': 0.5}
Factual Knowledge	country_capital	Damascus is to Syria as Havana is to	cuba	Cuba	0.96	1	1	{'Cuba': 0.96, '': 0.01, 'the': 0.0, 'Cub': 0.0, 'Castro': 0.0}	0	0.964844	0	1	context	context|target	0.51	TRUE	TRUE	TRUE	target	{'cuba': 0.51, 'havana': 0.49}
Factual Knowledge	country_capital	Damascus is to Syria as Oslo is to	norway	Norway	0.96	1	1	{'Norway': 0.96, 'Scandin': 0.01, 'the': 0.0, 'Sweden': 0.0, 'Oslo': 0.0}	0	0.960938	0	1	context	context|target	0.51	TRUE	TRUE	TRUE	target	{'norway': 0.51, 'oslo': 0.49}
Factual Knowledge	capital_world	Muscat is to Oman as Oslo is to	norway	Norway	0.96	1	1	{'Norway': 0.96, 'Nor': 0.0, 'Scandin': 0.0, 'Oslo': 0.0, 'the': 0.0}	0	0.957031	0	1	context	context|target	0.51	TRUE	TRUE	TRUE	target	{'norway': 0.51, 'oslo': 0.49}
Factual Knowledge	capital_world	Damascus is to Syria as Havana is to	cuba	Cuba	0.96	1	1	{'Cuba': 0.96, '': 0.01, 'the': 0.0, 'Cub': 0.0, 'Castro': 0.0}	0	0.964844	0	1	context	context|target	0.51	TRUE	TRUE	TRUE	target	{'cuba': 0.51, 'havana': 0.49}
Factual Knowledge	capital_world	Astana is to Kazakhstan as Bangkok is to	thailand	Thailand	0.95	1	1	{'Thailand': 0.95, 'Bangkok': 0.01, 'S': 0.0, '______': 0.0, 'what': 0.0}	0	0.949219	0	1	context	context|target	0.51	TRUE	TRUE	TRUE	target	{'thailand': 0.51, 'bangkok': 0.5}
Factual Knowledge	capital_world	Bern is to Switzerland as Bangkok is to	thailand	Thailand	0.95	1	1	{'Thailand': 0.95, 'the': 0.0, 'Southeast': 0.0, 'Asia': 0.0, '______': 0.0}	0	0.953125	0	1	context	context|target	0.51	TRUE	TRUE	TRUE	target	{'thailand': 0.51, 'bangkok': 0.5}
Factual Knowledge	country_capital	Bern is to Switzerland as Jakarta is to	indonesia	Indonesia	0.94	1	1	{'Indonesia': 0.94, 'Java': 0.01, 'the': 0.01, 'what': 0.0, '__': 0.0}	0	0.941406	0	1	context	context|target	0.51	TRUE	TRUE	TRUE	target	{'indonesia': 0.51, 'jakarta': 0.5}
Factual Knowledge	capital_world	Bern is to Switzerland as Jakarta is to	indonesia	Indonesia	0.94	1	1	{'Indonesia': 0.94, 'Java': 0.01, 'the': 0.01, 'what': 0.0, '__': 0.0}	0	0.941406	0	1	context	context|target	0.51	TRUE	TRUE	TRUE	target	{'indonesia': 0.51, 'jakarta': 0.5}
Verbal & Grammatical Forms	verb_inf_3pSg	contains is to contain as reduces is to	reduce	reduce	0.94	1	1	{'reduce': 0.94, 'contain': 0.0, 'reduction': 0.0, 'be': 0.0, 're': 0.0}	0	0.9375	0	1	context	context|target	0.51	TRUE	TRUE	TRUE	target	{'reduce': 0.51, 'reduces': 0.5}
Verbal & Grammatical Forms	verb_inf_3pSg	contains is to contain as exists is to	exist	exist	0.94	1	1	{'exist': 0.94, 'contain': 0.01, 'exit': 0.01, 'be': 0.01, 'to': 0.0}	0	0.941406	0	1	context	context|target	0.51	TRUE	TRUE	TRUE	target	{'exist': 0.51, 'exists': 0.48}
Factual Knowledge	country_capital	Damascus is to Syria as Tehran is to	iran	Iran	0.93	1	1	{'Iran': 0.93, 'Pers': 0.01, 'the': 0.01, 'what': 0.01, '': 0.0}	0	0.933594	0	1	context	context|target	0.51	TRUE	TRUE	TRUE	target	{'iran': 0.51, 'tehran': 0.48}
Factual Knowledge	country_capital	Damascus is to Syria as Ottawa is to	canada	Canada	0.92	1	1	{'Canada': 0.92, '__': 0.01, '______': 0.01, '_____': 0.0, 'what': 0.0}	0	0.921875	0	1	context	context|target	0.51	TRUE	TRUE	TRUE	target	{'canada': 0.51, 'ottawa': 0.5}
Factual Knowledge	country_capital	Amman is to Jordan as Madrid is to	spain	Spain	0.92	1	1	{'Spain': 0.92, '______': 0.01, 'what': 0.01, '__': 0.01, '_____': 0.0}	0	0.921875	0	1	context	context|target	0.51	TRUE	TRUE	TRUE	target	{'spain': 0.51, 'madrid': 0.49}
Factual Knowledge	capital_world	Hanoi is to Vietnam as Athens is to	greece	Greece	0.92	1	1	{'Greece': 0.92, '__': 0.01, '______': 0.01, 'what': 0.01, '_____': 0.0}	0	0.917969	0	1	context	context|target	0.51	TRUE	TRUE	TRUE	target	{'greece': 0.51, 'athens': 0.5}
Factual Knowledge	country_capital	Bern is to Switzerland as Islamabad is to	pakistan	Pakistan	0.91	1	1	{'Pakistan': 0.91, '______': 0.01, '__': 0.01, 'what': 0.0, '': 0.0}	0	0.90625	0	1	context	context|target	0.51	TRUE	TRUE	TRUE	target	{'pakistan': 0.51, 'islamabad': 0.5}
Factual Knowledge	capital_world	Hanoi is to Vietnam as Canberra is to	australia	Australia	0.91	1	1	{'Australia': 0.91, '______': 0.01, '__': 0.01, 'what': 0.0, '': 0.0}	0	0.90625	0	1	context	context|target	0.51	TRUE	TRUE	TRUE	target	{'australia': 0.51, 'canberra': 0.49}
Factual Knowledge	capital_world	Bern is to Switzerland as Islamabad is to	pakistan	Pakistan	0.91	1	1	{'Pakistan': 0.91, '______': 0.01, '__': 0.01, 'what': 0.0, '': 0.0}	0	0.90625	0	1	context	context|target	0.51	TRUE	TRUE	TRUE	target	{'pakistan': 0.51, 'islamabad': 0.5}
Factual Knowledge	country_capital	Tehran is to Iran as Tokyo is to	japan	Japan	0.9	1	1	{'Japan': 0.9, '______': 0.02, '_____': 0.01, '__': 0.01, 'what': 0.0}	0	0.898438	0	1	context	context|target	0.51	TRUE	TRUE	TRUE	target	{'japan': 0.51, 'tokyo': 0.48}
Factual Knowledge	capital_world	Skopje is to Macedonia as Stockholm is to	sweden	Sweden	0.9	1	1	{'Sweden': 0.9, 'Scandin': 0.02, 'Finland': 0.01, '': 0.01, 'the': 0.0}	0	0.902344	0	1	context	context|target	0.51	TRUE	TRUE	TRUE	target	{'sweden': 0.51, 'stockholm': 0.47}
Factual Knowledge	capital_world	Tehran is to Iran as Tokyo is to	japan	Japan	0.9	1	1	{'Japan': 0.9, '______': 0.02, '_____': 0.01, '__': 0.01, 'what': 0.0}	0	0.898438	0	1	context	context|target	0.51	TRUE	TRUE	TRUE	target	{'japan': 0.51, 'tokyo': 0.48}
Factual Knowledge	capital_world	Damascus is to Syria as Kigali is to	rwanda	Rwanda	0.9	1	1	{'Rwanda': 0.9, '': 0.02, 'what': 0.01, 'the': 0.01, 'Ru': 0.0}	0	0.898438	0	1	context	context|target	0.51	TRUE	TRUE	TRUE	target	{'rwanda': 0.51, 'kigali': 0.48}
Factual Knowledge	country_capital	Bangkok is to Thailand as Beirut is to	lebanon	Lebanon	0.89	1	1	{'Lebanon': 0.89, 'the': 0.01, '______': 0.01, 'what': 0.01, '': 0.01}	0	0.886719	0	1	context	context|target	0.51	TRUE	TRUE	TRUE	target	{'lebanon': 0.51, 'beirut': 0.49}
Factual Knowledge	country_capital	Beijing is to China as Kingston is to	jamaica	Jamaica	0.89	1	1	{'Jamaica': 0.89, 'Canada': 0.01, '__': 0.01, '______': 0.01, 'what': 0.01}	0	0.890625	0	1	context	context|target	0.51	TRUE	TRUE	TRUE	target	{'jamaica': 0.51, 'kingston': 0.5}
Factual Knowledge	country_capital	Hanoi is to Vietnam as Vienna is to	austria	Austria	0.89	1	1	{'Austria': 0.89, '______': 0.01, 'the': 0.01, 'what': 0.01, '__': 0.01}	0	0.886719	0	1	context	context|target	0.51	TRUE	TRUE	TRUE	target	{'austria': 0.51, 'vienna': 0.48}
Factual Knowledge	country_capital	Hanoi is to Vietnam as Kingston is to	jamaica	Jamaica	0.89	1	1	{'Jamaica': 0.89, '__': 0.01, '______': 0.01, 'what': 0.01, '': 0.0}	0	0.890625	0	1	context	context|target	0.51	TRUE	TRUE	TRUE	target	{'jamaica': 0.51, 'kingston': 0.5}
Factual Knowledge	country_capital	Lisbon is to Portugal as Ottawa is to	canada	Canada	0.89	1	1	{'Canada': 0.89, '__': 0.02, '______': 0.01, 'Ontario': 0.01, 'what': 0.0}	0	0.894531	0	1	context	context|target	0.51	TRUE	TRUE	TRUE	target	{'canada': 0.51, 'ottawa': 0.5}
Factual Knowledge	capital_world	Lisbon is to Portugal as Ottawa is to	canada	Canada	0.89	1	1	{'Canada': 0.89, '__': 0.02, '______': 0.01, 'Ontario': 0.01, 'what': 0.0}	0	0.894531	0	1	context	context|target	0.51	TRUE	TRUE	TRUE	target	{'canada': 0.51, 'ottawa': 0.5}
Factual Knowledge	capital_world	Bangkok is to Thailand as Beirut is to	lebanon	Lebanon	0.89	1	1	{'Lebanon': 0.89, 'the': 0.01, '______': 0.01, 'what': 0.01, '': 0.01}	0	0.886719	0	1	context	context|target	0.51	TRUE	TRUE	TRUE	target	{'lebanon': 0.51, 'beirut': 0.49}
Factual Knowledge	capital_world	Beijing is to China as Kingston is to	jamaica	Jamaica	0.89	1	1	{'Jamaica': 0.89, 'Canada': 0.01, '__': 0.01, '______': 0.01, 'what': 0.01}	0	0.890625	0	1	context	context|target	0.51	TRUE	TRUE	TRUE	target	{'jamaica': 0.51, 'kingston': 0.5}
Factual Knowledge	capital_world	Oslo is to Norway as Canberra is to	australia	Australia	0.89	1	1	{'Australia': 0.89, '______': 0.02, '__': 0.01, 'what': 0.0, '_____': 0.0}	0	0.894531	0	1	context	context|target	0.51	TRUE	TRUE	TRUE	target	{'australia': 0.51, 'canberra': 0.48}
Factual Knowledge	capital_world	Hanoi is to Vietnam as Kingston is to	jamaica	Jamaica	0.89	1	1	{'Jamaica': 0.89, '__': 0.01, '______': 0.01, 'what': 0.01, '': 0.0}	0	0.890625	0	1	context	context|target	0.51	TRUE	TRUE	TRUE	target	{'jamaica': 0.51, 'kingston': 0.5}
Morphological Modifiers	re+verb_reg	reassess is to assess as reinterpret is to	interpret	interpret	0.89	1	1	{'interpret': 0.89, 'understand': 0.02, 'translate': 0.01, '': 0.01, 'interpre': 0.0}	0	0.886719	0	1	context	context|target	0.51	TRUE	TRUE	TRUE	target	{'interpret': 0.51, 'reinterpret': 0.49}
Semantic Relations	antonyms_binary	remember is to forget as external is to	internal	internal	0.89	1	1	{'internal': 0.89, 'mental': 0.01, 'inner': 0.01, '': 0.0}	0	0.894531	0	1	context	context|target	0.51	TRUE	TRUE	TRUE	target	{'internal': 0.51, 'external': 0.48}
Verbal & Grammatical Forms	verb_inf_3pSg	contains is to contain as promotes is to	promote	promote	0.89	1	1	{'promote': 0.89, 'encourage': 0.01, 'prevent': 0.0, 'cause': 0.0, 'support': 0.0}	0	0.894531	0	1	context	context|target	0.51	TRUE	TRUE	TRUE	target	{'promote': 0.51, 'promotes': 0.48}
Factual Knowledge	country_capital	Damascus is to Syria as Vienna is to	austria	Austria	0.88	1	1	{'Austria': 0.88, '______': 0.01, 'the': 0.01, 'what': 0.01, '__': 0.01}	0	0.878906	0	1	context	context|target	0.51	TRUE	TRUE	TRUE	target	{'austria': 0.51, 'vienna': 0.48}
Factual Knowledge	capital_world	Nicosia is to Cyprus as Vientiane is to	laos	Laos	0.88	1	1	{'Laos': 0.88, 'what': 0.03, '__': 0.01, 'L': 0.01, '______': 0.01}	0	0.875	0	1	context	context|target	0.51	TRUE	TRUE	TRUE	target	{'laos': 0.51, 'vientiane': 0.51}
Factual Knowledge	capital_world	Astana is to Kazakhstan as Jakarta is to	indonesia	Indonesia	0.88	1	1	{'Indonesia': 0.88, 'what': 0.01, 'Java': 0.01, '______': 0.01, '__': 0.01}	0	0.875	0	1	context	context|target	0.51	TRUE	TRUE	TRUE	target	{'indonesia': 0.51, 'jakarta': 0.5}
Verbal & Grammatical Forms	verb_inf_Ving	containing is to contain as expecting is to	expect	expect	0.88	1	1	{'expect': 0.88, 'except': 0.01, 'be': 0.01, 'contain': 0.01, 'ex': 0.0}	0	0.875	0	1	context	context|target	0.51	TRUE	TRUE	TRUE	target	{'expect': 0.51, 'expecting': 0.5}
Morphological Modifiers	noun+less_reg	godless is to god as witless is to	wit	wit	0.87	1	1	{'wit': 0.87, 'w': 0.05, 'witty': 0.04, 'wise': 0.0, 'wisdom': 0.0}	0	0.867188	0	1	context	context|target	0.51	TRUE	TRUE	TRUE	target	{'wit': 0.51, 'witless': 0.47}
Morphological Modifiers	verb+er_irreg	announcer is to announce as examiner is to	examine	examine	0.87	1	1	{'examine': 0.87, 'exam': 0.02, '______': 0.01, 'question': 0.01, '__': 0.01}	0	0.871094	0	1	context	context|target	0.51	TRUE	TRUE	TRUE	target	{'examine': 0.51, 'examiner': 0.48}
Verbal & Grammatical Forms	verb_inf_Ved	identify is to identified as provide is to	provided	provided	0.87	1	1	{'provided': 0.87, 'provide': 0.02, 'provides': 0.01, 'providing': 0.01, 'given': 0.01}	0	0.867188	0	1	context	context|target	0.51	TRUE	TRUE	TRUE	target	{'provided': 0.51, 'provide': 0.5}
Factual Knowledge	country_capital	Bern is to Switzerland as Santiago is to	chile	Chile	0.86	1	1	{'Chile': 0.86, '__': 0.01, 'Spain': 0.01, '______': 0.01, 'what': 0.01}	0	0.859375	0	1	context	context|target	0.51	TRUE	TRUE	TRUE	target	{'chile': 0.51, 'santiago': 0.49}
Factual Knowledge	country_capital	Taipei is to Taiwan as Warsaw is to	poland	Poland	0.86	1	1	{'Poland': 0.86, '______': 0.02, '__': 0.01, '_____': 0.01, '': 0.0}	0	0.863281	0	1	context	context|target	0.51	TRUE	TRUE	TRUE	target	{'poland': 0.51, 'warsaw': 0.5}
Factual Knowledge	capital_world	Taipei is to Taiwan as Warsaw is to	poland	Poland	0.86	1	1	{'Poland': 0.86, '______': 0.02, '__': 0.01, '_____': 0.01, '': 0.0}	0	0.863281	0	1	context	context|target	0.51	TRUE	TRUE	TRUE	target	{'poland': 0.51, 'warsaw': 0.5}
Semantic Relations	family	woman is to man as girl is to	boy	boy	0.86	1	1	{'boy': 0.86, 'what': 0.01, '____': 0.01, '______': 0.01, '__': 0.01}	0	0.855469	0	1	context	context|target	0.51	TRUE	TRUE	TRUE	target	{'boy': 0.51, 'girl': 0.49}
Semantic Relations	male_female	goddess is to god as waitress is to	waiter	waiter	0.86	1	1	{'waiter': 0.86, 'what': 0.04, 'wait': 0.01, '____': 0.01, '______': 0.01}	0	0.859375	0	1	context	context|target	0.51	TRUE	TRUE	TRUE	target	{'waiter': 0.51, 'waitress': 0.49}
Verbal & Grammatical Forms	verb_inf_Ving	existing is to exist as preventing is to	prevent	prevent	0.86	1	1	{'prevent': 0.86, 'be': 0.03, 'exist': 0.01, 'not': 0.01, 'cause': 0.01}	0	0.859375	0	1	context	context|target	0.51	TRUE	TRUE	TRUE	target	{'prevent': 0.51, 'preventing': 0.48}
Verbal & Grammatical Forms	verb_inf_Ving	remaining is to remain as requiring is to	require	require	0.86	1	1	{'require': 0.86, 'be': 0.02, 'ob': 0.02, 'request': 0.01, 'requ': 0.01}	0	0.855469	0	1	context	context|target	0.51	TRUE	TRUE	TRUE	target	{'require': 0.51, 'requiring': 0.49}
Verbal & Grammatical Forms	verb_inf_Ving	requiring is to require as telling is to	tell	tell	0.86	1	1	{'tell': 0.86, 'say': 0.01, 'be': 0.01, 'require': 0.0, 'narr': 0.0}	0	0.859375	0	1	context	context|target	0.51	TRUE	TRUE	TRUE	target	{'tell': 0.51, 'telling': 0.48}
Factual Knowledge	capital_world	Hanoi is to Vietnam as Baghdad is to	iraq	Iraq	0.85	1	1	{'Iraq': 0.85, '______': 0.02, 'what': 0.02, '__': 0.01, 'Iran': 0.01}	0	0.851562	0	1	context	context|target	0.51	TRUE	TRUE	TRUE	target	{'iraq': 0.51, 'baghdad': 0.49}
Verbal & Grammatical Forms	verb_inf_Ving	continuing is to continue as protecting is to	protect	protect	0.85	1	1	{'protect': 0.85, 'continue': 0.03, 'be': 0.02, 'protecting': 0.01, 'keep': 0.0}	0	0.851562	0	1	context	context|target	0.51	TRUE	TRUE	TRUE	target	{'protect': 0.51, 'protecting': 0.5}
Verbal & Grammatical Forms	verb_inf_Ving	seeming is to seem as telling is to	tell	tell	0.85	1	1	{'tell': 0.85, 'say': 0.03, 'be': 0.01, 'talk': 0.01, '': 0.01}	0	0.847656	0	1	context	context|target	0.51	TRUE	TRUE	TRUE	target	{'tell': 0.51, 'telling': 0.48}
Semantic Relations	nationality_adjective	Norwegian is to Norway as Maltese is to	malta	Malta	0.84	1	1	{'Malta': 0.84, '______': 0.01, 'what': 0.01, '__': 0.01, 'the': 0.01}	0	0.839844	0	1	context	context|target	0.51	TRUE	TRUE	TRUE	target	{'malta': 0.51, 'maltese': 0.51}
Verbal & Grammatical Forms	verb_inf_3pSg	contains is to contain as prevents is to	prevent	prevent	0.84	1	1	{'prevent': 0.84, 'stop': 0.03, 'hinder': 0.01, 'pre': 0.01, 'not': 0.01}	0	0.84375	0	1	context	context|target	0.51	TRUE	TRUE	TRUE	target	{'prevent': 0.51, 'prevents': 0.49}
Verbal & Grammatical Forms	verb_inf_Ving	continuing is to continue as providing is to	provide	provide	0.84	1	1	{'provide': 0.84, 'continue': 0.05, 'give': 0.02, 'providing': 0.01, 'be': 0.01}	0	0.84375	0	1	context	context|target	0.51	TRUE	TRUE	TRUE	target	{'provide': 0.51, 'providing': 0.48}
Verbal & Grammatical Forms	verb_inf_Ving	continuing is to continue as promoting is to	promote	promote	0.84	1	1	{'promote': 0.84, 'continue': 0.02, 'promoting': 0.01, 'be': 0.01, '______': 0.0}	0	0.839844	0	1	context	context|target	0.51	TRUE	TRUE	TRUE	target	{'promote': 0.51, 'promoting': 0.47}
Verbal & Grammatical Forms	verb_Ving_Ved	appeared is to appearing as heard is to	hearing	hearing	0.84	1	1	{'hearing': 0.84, 'being': 0.03, 'sounding': 0.01, 'the': 0.01, 'sound': 0.01}	0	0.835938	0	1	context	context|target	0.51	TRUE	TRUE	TRUE	target	{'hearing': 0.51, 'heard': 0.49}
Factual Knowledge	country_capital	Bern is to Switzerland as Madrid is to	spain	Spain	0.83	1	1	{'Spain': 0.83, '______': 0.02, 'what': 0.01, 'which': 0.01, '_____': 0.01}	0	0.828125	0	1	context	context|target	0.51	TRUE	TRUE	TRUE	target	{'spain': 0.51, 'madrid': 0.49}
Factual Knowledge	capital_world	Rabat is to Morocco as Warsaw is to	poland	Poland	0.83	1	1	{'Poland': 0.83, '______': 0.03, '__': 0.02, '_____': 0.01, '': 0.01}	0	0.828125	0	1	context	context|target	0.51	TRUE	TRUE	TRUE	target	{'poland': 0.51, 'warsaw': 0.5}
Factual Knowledge	capital_world	Bern is to Switzerland as Madrid is to	spain	Spain	0.83	1	1	{'Spain': 0.83, '______': 0.02, 'what': 0.01, 'which': 0.01, '_____': 0.01}	0	0.828125	0	1	context	context|target	0.51	TRUE	TRUE	TRUE	target	{'spain': 0.51, 'madrid': 0.49}
Factual Knowledge	capital_world	Tehran is to Iran as Ottawa is to	canada	Canada	0.83	1	1	{'Canada': 0.83, '__': 0.04, '______': 0.02, '_____': 0.01, '____': 0.01}	0	0.832031	0	1	context	context|target	0.51	TRUE	TRUE	TRUE	target	{'canada': 0.51, 'ottawa': 0.48}
Morphological Modifiers	adj+ly_reg	apparently is to apparent as extensively is to	extensive	extensive	0.83	1	1	{'extensive': 0.83, 'extent': 0.11, 'ext': 0.03, 'extended': 0.01, 'extend': 0.01}	0	0.832031	0	1	context	context|target	0.51	TRUE	TRUE	TRUE	target	{'extensive': 0.51, 'extensively': 0.49}
Morphological Modifiers	re+verb_reg	redevelop is to develop as resend is to	send	send	0.83	1	1	{'send': 0.83, 'resend': 0.02, 'resent': 0.02, 'rent': 0.01, 'res': 0.01}	0	0.832031	0	1	context	context|target	0.51	TRUE	TRUE	TRUE	target	{'send': 0.51, 'resend': 0.48}
Verbal & Grammatical Forms	verb_inf_Ving	expecting is to expect as providing is to	provide	provide	0.83	1	1	{'provide': 0.83, 'give': 0.03, 'providing': 0.02, 'provid': 0.01, 'supply': 0.01}	0	0.828125	0	1	context	context|target	0.51	TRUE	TRUE	TRUE	target	{'provide': 0.51, 'providing': 0.49}
Factual Knowledge	country_capital	Berlin is to Germany as Madrid is to	spain	Spain	0.82	1	1	{'Spain': 0.82, '______': 0.03, 'what': 0.02, '_____': 0.01, 'which': 0.01}	0	0.824219	0	1	context	context|target	0.51	TRUE	TRUE	TRUE	target	{'spain': 0.51, 'madrid': 0.48}
Factual Knowledge	capital_world	Berlin is to Germany as Madrid is to	spain	Spain	0.82	1	1	{'Spain': 0.82, '______': 0.03, 'what': 0.02, '_____': 0.01, 'which': 0.01}	0	0.824219	0	1	context	context|target	0.51	TRUE	TRUE	TRUE	target	{'spain': 0.51, 'madrid': 0.48}
Factual Knowledge	capital_world	Oslo is to Norway as Bangkok is to	thailand	Thailand	0.82	1	1	{'Thailand': 0.82, '______': 0.02, '__': 0.01, 'what': 0.01, '_____': 0.01}	0	0.820312	0	1	context	context|target	0.51	TRUE	TRUE	TRUE	target	{'thailand': 0.51, 'bangkok': 0.51}
Morphological Modifiers	re+verb_reg	redevelop is to develop as retell is to	tell	tell	0.82	1	1	{'tell': 0.82, 'ret': 0.02, 'narr': 0.01, '____': 0.01, '': 0.01}	0	0.816406	0	1	context	context|target	0.51	TRUE	TRUE	TRUE	target	{'tell': 0.51, 'retell': 0.5}
Morphological Modifiers	adj+ly_reg	historical is to historically as virtual is to	virtually	virtually	0.82	1	1	{'virtually': 0.82, 'virt': 0.02, 'virtual': 0.02, 'actually': 0.01, 'really': 0.01}	0	0.820312	0	1	context	context|target	0.51	TRUE	TRUE	TRUE	target	{'virtually': 0.51, 'virtual': 0.51}
Verbal & Grammatical Forms	verb_inf_Ving	achieving is to achieve as enjoying is to	enjoy	enjoy	0.82	1	1	{'enjoy': 0.82, 'be': 0.03, 'enjoyment': 0.01, 'suffer': 0.01, 'enjoying': 0.01}	0	0.820312	0	1	context	context|target	0.51	TRUE	TRUE	TRUE	target	{'enjoy': 0.51, 'enjoying': 0.51}
Verbal & Grammatical Forms	verb_inf_Ved	announce is to announced as spend is to	spent	spent	0.82	1	1	{'spent': 0.82, 'earned': 0.01, '': 0.01, '?': 0.01}	0	0.816406	0	1	context	context|target	0.51	TRUE	TRUE	TRUE	target	{'spent': 0.51, 'spend': 0.49}
Factual Knowledge	capital_world	Tirana is to Albania as Baghdad is to	iraq	Iraq	0.81	1	1	{'Iraq': 0.81, '______': 0.02, '__': 0.02, 'what': 0.01, '_____': 0.01}	0	0.8125	0	1	context	context|target	0.51	TRUE	TRUE	TRUE	target	{'iraq': 0.51, 'baghdad': 0.49}
Morphological Modifiers	re+verb_reg	rearrange is to arrange as republish is to	publish	publish	0.81	1	1	{'publish': 0.81, '__': 0.02, '': 0.01, '______': 0.01}	0	0.8125	0	1	context	context|target	0.51	TRUE	TRUE	TRUE	target	{'publish': 0.51, 'republish': 0.51}
Morphological Modifiers	adj_superlative	ugliest is to ugly as weakest is to	weak	strong	0.8	0	1	{'strong': 0.8, 'weak': 0.05, 'strongest': 0.01, '______': 0.01, '____': 0.01}	1	0.0483398	0.756348	0.99999	context	context|target	0.51	TRUE	TRUE	TRUE	target	{'weak': 0.51, 'weakest': 0.48}
Morphological Modifiers	verb+ment_irreg	excitement is to excite as punishment is to	punish	punish	0.8	1	1	{'punish': 0.8, '': 0.01, '______': 0.01, '__': 0.01}	0	0.800781	0	1	context	context|target	0.51	TRUE	TRUE	TRUE	target	{'punish': 0.51, 'punishment': 0.48}
Semantic Relations	antonyms_binary	remember is to forget as immortal is to	mortal	mortal	0.8	1	1	{'mortal': 0.8, 'mort': 0.03, 'immortal': 0.01, 'dead': 0.01, 'death': 0.01}	0	0.796875	0	1	context	context|target	0.51	TRUE	TRUE	TRUE	target	{'mortal': 0.51, 'immortal': 0.49}
Verbal & Grammatical Forms	verb_inf_Ved	describe is to described as provide is to	provided	provided	0.8	1	1	{'provided': 0.8, 'provide': 0.06, 'provides': 0.01, '______': 0.01, '': 0.01}	0	0.800781	0	1	context	context|target	0.51	TRUE	TRUE	TRUE	target	{'provided': 0.51, 'provide': 0.5}
Verbal & Grammatical Forms	verb_inf_Ving	expecting is to expect as requiring is to	require	require	0.8	1	1	{'require': 0.8, 'ob': 0.02, 'demand': 0.01, 'compel': 0.01, 'command': 0.01}	0	0.800781	0	1	context	context|target	0.51	TRUE	TRUE	TRUE	target	{'require': 0.51, 'requiring': 0.5}
Verbal & Grammatical Forms	verb_Ving_Ved	managed is to managing as understood is to	understanding	understanding	0.8	1	1	{'understanding': 0.8, '______': 0.03, '__': 0.03, 'compreh': 0.01, 'understood': 0.01}	0	0.800781	0	1	context	context|target	0.51	TRUE	TRUE	TRUE	target	{'understanding': 0.51, 'understood': 0.49}
Factual Knowledge	capital_world	Muscat is to Oman as Taipei is to	taiwan	Taiwan	0.79	1	1	{'Taiwan': 0.79, 'China': 0.03, '__': 0.02, '______': 0.02, 'the': 0.01}	0	0.792969	0	1	context	context|target	0.51	TRUE	TRUE	TRUE	target	{'taiwan': 0.51, 'taipei': 0.49}
Factual Knowledge	capital_world	Tehran is to Iran as Bangkok is to	thailand	Thailand	0.79	1	1	{'Thailand': 0.79, 'what': 0.03, '______': 0.03, '__': 0.02, '_____': 0.01}	0	0.792969	0	1	context	context|target	0.51	TRUE	TRUE	TRUE	target	{'thailand': 0.51, 'bangkok': 0.5}
Morphological Modifiers	verb+able_reg	executable is to execute as explainable is to	explain	explain	0.79	1	1	{'explain': 0.79, 'understand': 0.01, 'be': 0.01, 'give': 0.01, 'make': 0.01}	0	0.785156	0	1	context	context|target	0.51	TRUE	TRUE	TRUE	target	{'explain': 0.51, 'explainable': 0.49}
Morphological Modifiers	adj+ly_reg	historically is to historical as virtually is to	virtual	virtual	0.79	1	1	{'virtual': 0.79, 'real': 0.07, 'virtually': 0.02, 'actual': 0.01, '': 0.01}	0	0.789062	0	1	context	context|target	0.51	TRUE	TRUE	TRUE	target	{'virtual': 0.51, 'virtually': 0.51}
Verbal & Grammatical Forms	verb_inf_3pSg	occurs is to occur as protects is to	protect	protect	0.79	1	1	{'protect': 0.79, 'occur': 0.04, 'protects': 0.02, 'be': 0.02, '': 0.01}	0	0.789062	0	1	context	context|target	0.51	TRUE	TRUE	TRUE	target	{'protect': 0.51, 'protects': 0.5}
Verbal & Grammatical Forms	verb_inf_Ving	remaining is to remain as teaching is to	teach	teach	0.79	1	1	{'teach': 0.79, 'learn': 0.03, 'be': 0.03, 'instruct': 0.01, 'become': 0.01}	0	0.789062	0	1	context	context|target	0.51	TRUE	TRUE	TRUE	target	{'teach': 0.51, 'teaching': 0.48}
Verbal & Grammatical Forms	verb_inf_Ving	attending is to attend as expecting is to	expect	expect	0.78	1	1	{'expect': 0.78, 'hope': 0.03, 'be': 0.02, 'wait': 0.02, '': 0.01}	0	0.777344	0	1	context	context|target	0.51	TRUE	TRUE	TRUE	target	{'expect': 0.51, 'expecting': 0.5}
Verbal & Grammatical Forms	verb_inf_Ved	accept is to accepted as spend is to	spent	spent	0.78	1	1	{'spent': 0.78, '______': 0.02, '__': 0.01, '': 0.01, 'expense': 0.01}	0	0.78125	0	1	context	context|target	0.51	TRUE	TRUE	TRUE	target	{'spent': 0.51, 'spend': 0.5}
Factual Knowledge	capital_world	Banjul is to Gambia as Damascus is to	syria	Syria	0.77	1	1	{'Syria': 0.77, 'what': 0.03, '______': 0.03, '__': 0.02, ':': 0.02}	0	0.769531	0	1	context	context|target	0.51	TRUE	TRUE	TRUE	target	{'syria': 0.51, 'damascus': 0.51}
Morphological Modifiers	adj_comparative	dumber is to dumb as lazier is to	lazy	lazy	0.77	1	1	{'lazy': 0.77, '"': 0.01, '______': 0.01, '____': 0.01, '...': 0.01}	0	0.773438	0	1	context	context|target	0.51	TRUE	TRUE	TRUE	target	{'lazy': 0.51, 'lazier': 0.46}
Morphological Modifiers	verb+er_irreg	announcer is to announce as discoverer is to	discover	discover	0.77	1	1	{'discover': 0.77, 'invent': 0.03, 'discovery': 0.02, 'find': 0.01, '': 0.01}	0	0.769531	0	1	context	context|target	0.51	TRUE	TRUE	TRUE	target	{'discover': 0.51, 'discoverer': 0.48}
Verbal & Grammatical Forms	verb_inf_3pSg	becomes is to become as requires is to	require	require	0.77	1	1	{'require': 0.77, 'be': 0.05, 'become': 0.02, 'requires': 0.01, '': 0.01}	0	0.769531	0	1	context	context|target	0.51	TRUE	TRUE	TRUE	target	{'require': 0.51, 'requires': 0.5}
Verbal & Grammatical Forms	noun_plural_irreg	basis is to bases as country is to	countries	countries	0.77	1	1	{'countries': 0.77, 'country': 0.03, 'nations': 0.02, '__': 0.01, 'continent': 0.01}	0	0.773438	0	1	context	context|target	0.51	TRUE	TRUE	TRUE	target	{'countries': 0.51, 'country': 0.48}
Verbal & Grammatical Forms	verb_inf_Ving	expecting is to expect as preventing is to	prevent	prevent	0.77	1	1	{'prevent': 0.77, 'anticipate': 0.01, 'pre': 0.01, 'prepare': 0.01, 'a': 0.01}	0	0.773438	0	1	context	context|target	0.51	TRUE	TRUE	TRUE	target	{'prevent': 0.51, 'preventing': 0.48}
Verbal & Grammatical Forms	verb_inf_Ving	continuing is to continue as following is to	follow	follow	0.77	1	1	{'follow': 0.77, 'continue': 0.08, 'be': 0.02, 'go': 0.02, 'following': 0.01}	0	0.769531	0	1	context	context|target	0.51	TRUE	TRUE	TRUE	target	{'follow': 0.51, 'following': 0.5}
Factual Knowledge	capital_world	Bratislava is to Slovakia as Copenhagen is to	denmark	Denmark	0.76	1	1	{'Denmark': 0.76, '__': 0.02, '______': 0.02, 'what': 0.02, 'which': 0.02}	0	0.761719	0	1	context	context|target	0.51	TRUE	TRUE	TRUE	target	{'denmark': 0.51, 'copenhagen': 0.49}
Factual Knowledge	capital_world	Belmopan is to Belize as Jakarta is to	indonesia	Indonesia	0.76	1	1	{'Indonesia': 0.76, 'what': 0.04, ':': 0.03, 'which': 0.01, 'Java': 0.01}	0	0.757812	0	1	context	context|target	0.51	TRUE	TRUE	TRUE	target	{'indonesia': 0.51, 'jakarta': 0.5}
Morphological Modifiers	adj_superlative	dumbest is to dumb as weirdest is to	weird	weird	0.76	1	1	{'weird': 0.76, 'weir': 0.05, 'w': 0.01, '______': 0.01, 'strange': 0.01}	0	0.761719	0	1	context	context|target	0.51	TRUE	TRUE	TRUE	target	{'weird': 0.51, 'weirdest': 0.5}
Verbal & Grammatical Forms	verb_3pSg_Ved	adds is to added as receives is to	received	received	0.76	1	1	{'received': 0.76, 'receives': 0.03, 'subtract': 0.02, 'receive': 0.01, 'given': 0.01}	0	0.757812	0	1	context	context|target	0.51	TRUE	TRUE	TRUE	target	{'received': 0.51, 'receives': 0.49}
Factual Knowledge	country_capital	Bern is to Switzerland as Hanoi is to	vietnam	Vietnam	0.75	1	1	{'Vietnam': 0.75, 'Viet': 0.09, '______': 0.02, '__': 0.01, 'what': 0.01}	0	0.75	0	1	context	context|target	0.51	TRUE	TRUE	TRUE	target	{'vietnam': 0.51, 'hanoi': 0.49}
Factual Knowledge	capital_world	Bern is to Switzerland as Hanoi is to	vietnam	Vietnam	0.75	1	1	{'Vietnam': 0.75, 'Viet': 0.09, '______': 0.02, '__': 0.01, 'what': 0.01}	0	0.75	0	1	context	context|target	0.51	TRUE	TRUE	TRUE	target	{'vietnam': 0.51, 'hanoi': 0.49}
Morphological Modifiers	verb+able_reg	foreseeable is to foresee as performable is to	perform	perform	0.75	1	1	{'perform': 0.75, 'do': 0.06, 'be': 0.03, 'execute': 0.01, 'accomplish': 0.01}	0	0.75	0	1	context	context|target	0.51	TRUE	TRUE	TRUE	target	{'perform': 0.51, 'performable': 0.48}
Morphological Modifiers	adj_comparative	happier is to happy as prouder is to	proud	proud	0.75	1	1	{'proud': 0.75, '______': 0.03, '____': 0.02, '_____': 0.01, 'pride': 0.01}	0	0.753906	0	1	context	context|target	0.51	TRUE	TRUE	TRUE	target	{'proud': 0.51, 'prouder': 0.48}
Morphological Modifiers	noun+less_reg	artless is to art as guiltless is to	guilt	guilt	0.75	1	1	{'guilt': 0.75, 'guilty': 0.06, '______': 0.02, '____': 0.02, '_____': 0.01}	0	0.753906	0	1	context	context|target	0.51	TRUE	TRUE	TRUE	target	{'guilt': 0.51, 'guiltless': 0.45}
Morphological Modifiers	adj+ly_reg	apparently is to apparent as environmentally is to	environmental	environment	0.75	0.5	1	{'environment': 0.75, 'environmental': 0.18, 'environ': 0.02, '': 0.01, 'the': 0.01}	1	0.177734	0.572266	0.99999	context	context|target	0.51	TRUE	TRUE	TRUE	target	{'environmental': 0.51, 'environmentally': 0.5}
Morphological Modifiers	un+adj_reg	unnoticed is to noticed as unsuccessful is to	successful	successful	0.75	1	1	{'successful': 0.75, '______': 0.02, '__': 0.01, '': 0.01, 'success': 0.01}	0	0.753906	0	1	context	context|target	0.51	TRUE	TRUE	TRUE	target	{'successful': 0.51, 'unsuccessful': 0.48}
Morphological Modifiers	verb+er_irreg	entertainer is to entertain as teacher is to	teach	teach	0.75	1	1	{'teach': 0.75, 'educate': 0.05, '__': 0.02, 'instruct': 0.01, '______': 0.01}	0	0.746094	0	1	context	context|target	0.51	TRUE	TRUE	TRUE	target	{'teach': 0.51, 'teacher': 0.51}
Verbal & Grammatical Forms	noun_plural_irreg	basis is to bases as duty is to	duties	duties	0.75	1	1	{'duties': 0.75, 'dues': 0.05, 'duty': 0.01, 'dut': 0.01, 'du': 0.01}	0	0.753906	0	1	context	context|target	0.51	TRUE	TRUE	TRUE	target	{'duties': 0.51, 'duty': 0.5}
Verbal & Grammatical Forms	verb_inf_Ved	announce is to announced as apply is to	applied	applied	0.75	1	1	{'applied': 0.75, 'application': 0.03, '': 0.01, '?': 0.01}	0	0.753906	0	1	context	context|target	0.51	TRUE	TRUE	TRUE	target	{'applied': 0.51, 'apply': 0.5}
Verbal & Grammatical Forms	verb_3pSg_Ved	expects is to expected as receives is to	received	received	0.75	1	1	{'received': 0.75, 'expected': 0.01, '__': 0.01, '______': 0.01, '': 0.01}	0	0.75	0	1	context	context|target	0.51	TRUE	TRUE	TRUE	target	{'received': 0.51, 'receives': 0.5}
Verbal & Grammatical Forms	verb_3pSg_Ved	consists is to consisted as loses is to	lost	lost	0.75	1	1	{'lost': 0.75, 'lose': 0.05, 'loss': 0.04, 'lo': 0.01, '': 0.01}	0	0.75	0	1	context	context|target	0.51	TRUE	TRUE	TRUE	target	{'lost': 0.51, 'loses': 0.5}
Morphological Modifiers	verb+er_irreg	announcer is to announce as eater is to	eat	eat	0.74	1	1	{'eat': 0.74, '______': 0.01, '__': 0.01, 'chew': 0.01, 'be': 0.01}	0	0.738281	0	1	context	context|target	0.51	TRUE	TRUE	TRUE	target	{'eat': 0.51, 'eater': 0.46}
Verbal & Grammatical Forms	verb_inf_Ving	consider is to considering as contain is to	containing	containing	0.74	1	1	{'containing': 0.74, 'contained': 0.05, 'contains': 0.03, 'containment': 0.03, 'contain': 0.02}	0	0.742188	0	1	context	context|target	0.51	TRUE	TRUE	TRUE	target	{'containing': 0.51, 'contain': 0.48}
Factual Knowledge	country_capital	Syria is to Damascus as Cuba is to	havana	Havana	0.73	1	1	{'Havana': 0.73, '__': 0.02, '______': 0.02, '': 0.02, 'Hav': 0.01}	0	0.730469	0	1	context	context|target	0.51	TRUE	TRUE	TRUE	target	{'havana': 0.51, 'cuba': 0.49}
Factual Knowledge	capital_world	Syria is to Damascus as Cuba is to	havana	Havana	0.73	1	1	{'Havana': 0.73, '__': 0.02, '______': 0.02, '': 0.02, 'Hav': 0.01}	0	0.730469	0	1	context	context|target	0.51	TRUE	TRUE	TRUE	target	{'havana': 0.51, 'cuba': 0.49}
Morphological Modifiers	un+adj_reg	unavoidable is to avoidable as undesirable is to	desirable	desirable	0.73	1	1	{'desirable': 0.73, 'undesirable': 0.07, 'des': 0.02, '______': 0.01, '"': 0.01}	0	0.734375	0	1	context	context|target	0.51	TRUE	TRUE	TRUE	target	{'desirable': 0.51, 'undesirable': 0.49}
Morphological Modifiers	adj+ness_reg	seriousness is to serious as strangeness is to	strange	strange	0.73	1	1	{'strange': 0.73, '______': 0.01, 'strang': 0.01, '...': 0.01, '_____': 0.01}	0	0.734375	0	1	context	context|target	0.51	TRUE	TRUE	TRUE	target	{'strange': 0.51, 'strangeness': 0.49}
Verbal & Grammatical Forms	verb_inf_3pSg	agrees is to agree as involves is to	involve	involve	0.73	1	1	{'involve': 0.73, 'be': 0.02, 'include': 0.02, 'have': 0.01, 'cause': 0.01}	0	0.730469	0	1	context	context|target	0.51	TRUE	TRUE	TRUE	target	{'involve': 0.51, 'involves': 0.48}
Verbal & Grammatical Forms	verb_inf_Ved	involved is to involve as replaced is to	replace	replace	0.73	1	1	{'replace': 0.73, 'be': 0.03, 'replaced': 0.02, 'involve': 0.02, '': 0.01}	0	0.726562	0	1	context	context|target	0.51	TRUE	TRUE	TRUE	target	{'replace': 0.51, 'replaced': 0.51}
Factual Knowledge	capital_world	Muscat is to Oman as Tunis is to	tunisia	Tunisia	0.72	1	1	{'Tunisia': 0.72, '__': 0.03, '______': 0.03, 'what': 0.02, '_____': 0.01}	0	0.722656	0	1	context	context|target	0.51	TRUE	TRUE	TRUE	target	{'tunisia': 0.51, 'tunis': 0.5}
Factual Knowledge	capital_world	Rabat is to Morocco as Vientiane is to	laos	Laos	0.72	1	1	{'Laos': 0.72, 'what': 0.07, '__': 0.03, '______': 0.02, 'which': 0.02}	0	0.71875	0	1	context	context|target	0.51	TRUE	TRUE	TRUE	target	{'laos': 0.51, 'vientiane': 0.5}
Factual Knowledge	capital_world	Suva is to Fiji as Algiers is to	algeria	Algeria	0.72	1	1	{'Algeria': 0.72, 'North': 0.07, 'France': 0.05, 'the': 0.03, 'French': 0.02}	0	0.722656	0	1	context	context|target	0.51	TRUE	TRUE	TRUE	target	{'algeria': 0.51, 'algiers': 0.47}
Factual Knowledge	country_capital	China is to Beijing as Syria is to	damascus	Damascus	0.71	1	1	{'Damascus': 0.71, 'Aleppo': 0.04, '______': 0.04, '__': 0.03, '...': 0.01}	0	0.710938	0	1	context	context|target	0.51	TRUE	TRUE	TRUE	target	{'damascus': 0.51, 'syria': 0.5}
Factual Knowledge	capital_world	China is to Beijing as Syria is to	damascus	Damascus	0.71	1	1	{'Damascus': 0.71, 'Aleppo': 0.04, '______': 0.04, '__': 0.03, '...': 0.01}	0	0.710938	0	1	context	context|target	0.51	TRUE	TRUE	TRUE	target	{'damascus': 0.51, 'syria': 0.5}
Morphological Modifiers	adj_superlative	hugest is to huge as ugliest is to	ugly	ugly	0.71	1	1	{'ugly': 0.71, '': 0.02, 'beautiful': 0.02, '?': 0.01}	0	0.710938	0	1	context	context|target	0.51	TRUE	TRUE	TRUE	target	{'ugly': 0.51, 'ugliest': 0.49}
Morphological Modifiers	noun+less_reg	moneyless is to money as soulless is to	soul	soul	0.71	1	1	{'soul': 0.71, 'sou': 0.05, '': 0.02, 'heart': 0.01, 'the': 0.01}	0	0.714844	0	1	context	context|target	0.51	TRUE	TRUE	TRUE	target	{'soul': 0.51, 'soulless': 0.51}
Morphological Modifiers	verb+able_reg	achieveable is to achieve as adjustable is to	adjust	adjust	0.71	1	1	{'adjust': 0.71, 'adapt': 0.03, 'be': 0.02, 'adjustable': 0.01, 'regulate': 0.01}	0	0.707031	0	1	context	context|target	0.51	TRUE	TRUE	TRUE	target	{'adjust': 0.51, 'adjustable': 0.5}
Morphological Modifiers	re+verb_reg	reassign is to assign as reintroduce is to	introduce	introduce	0.71	1	1	{'introduce': 0.71, 'present': 0.06, 'reint': 0.06, 'bring': 0.02, '': 0.02}	0	0.710938	0	1	context	context|target	0.51	TRUE	TRUE	TRUE	target	{'introduce': 0.51, 'reintroduce': 0.48}
Verbal & Grammatical Forms	verb_inf_3pSg	develops is to develop as enables is to	enable	enable	0.71	1	1	{'enable': 0.71, 'be': 0.03, 'enables': 0.02, 'make': 0.01, 'able': 0.01}	0	0.710938	0	1	context	context|target	0.51	TRUE	TRUE	TRUE	target	{'enable': 0.51, 'enables': 0.49}
Verbal & Grammatical Forms	verb_Ving_Ved	related is to relating as understood is to	understanding	understanding	0.71	1	1	{'understanding': 0.71, 'understood': 0.12, 'understand': 0.02, '______': 0.01, '__': 0.01}	0	0.714844	0	1	context	context|target	0.51	TRUE	TRUE	TRUE	target	{'understanding': 0.51, 'understood': 0.5}
Verbal & Grammatical Forms	verb_3pSg_Ved	occurs is to occurred as provides is to	provided	provided	0.71	1	1	{'provided': 0.71, '______': 0.02, '': 0.01, '__': 0.01}	0	0.714844	0	1	context	context|target	0.51	TRUE	TRUE	TRUE	target	{'provided': 0.51, 'provides': 0.48}
Factual Knowledge	country_capital	Bern is to Switzerland as Taipei is to	taiwan	Taiwan	0.7	1	1	{'Taiwan': 0.7, 'China': 0.04, '__': 0.03, 'the': 0.02, '______': 0.02}	0	0.703125	0	1	context	context|target	0.51	TRUE	TRUE	TRUE	target	{'taiwan': 0.51, 'taipei': 0.49}
Factual Knowledge	capital_world	Banjul is to Gambia as Cairo is to	egypt	Egypt	0.7	1	1	{'Egypt': 0.7, '______': 0.03, '__': 0.03, ':': 0.02, 'what': 0.02}	0	0.703125	0	1	context	context|target	0.51	TRUE	TRUE	TRUE	target	{'egypt': 0.51, 'cairo': 0.51}
Morphological Modifiers	adj_superlative	lengthiest is to lengthy as rudest is to	rude	rude	0.7	1	1	{'rude': 0.7, 'polite': 0.04, 'courteous': 0.02, 'imp': 0.01, '______': 0.01}	0	0.699219	0	1	context	context|target	0.51	TRUE	TRUE	TRUE	target	{'rude': 0.51, 'rudest': 0.5}
Morphological Modifiers	adj+ness_reg	hotness is to hot as obviousness is to	obvious	obvious	0.7	1	1	{'obvious': 0.7, 'what': 0.02, '______': 0.01, 'ob': 0.01, 'clear': 0.01}	0	0.695312	0	1	context	context|target	0.51	TRUE	TRUE	TRUE	target	{'obvious': 0.51, 'obviousness': 0.49}
Morphological Modifiers	verb+er_irreg	observer is to observe as organizer is to	organize	organize	0.7	1	1	{'organize': 0.7, '______': 0.02, '': 0.01, 'plan': 0.01}	0	0.695312	0	1	context	context|target	0.51	TRUE	TRUE	TRUE	target	{'organize': 0.51, 'organizer': 0.47}
Morphological Modifiers	verb+er_irreg	promoter is to promote as writer is to	write	write	0.7	1	1	{'write': 0.7, 'writing': 0.03, 'writer': 0.02, '______': 0.01, 'create': 0.01}	0	0.703125	0	1	context	context|target	0.51	TRUE	TRUE	TRUE	target	{'write': 0.51, 'writer': 0.49}
Verbal & Grammatical Forms	noun_plural_reg	god is to gods as government is to	governments	governments	0.7	1	1	{'governments': 0.7, 'gods': 0.04, 'the': 0.03, 'government': 0.02, 'governors': 0.02}	0	0.703125	0	1	context	context|target	0.51	TRUE	TRUE	TRUE	target	{'governments': 0.51, 'government': 0.5}
Verbal & Grammatical Forms	verb_3pSg_Ved	introduces is to introduced as relates is to	related	related	0.7	1	1	{'related': 0.7, 'relation': 0.05, 'relates': 0.05, 'relate': 0.04, 'relating': 0.02}	0	0.699219	0	1	context	context|target	0.51	TRUE	TRUE	TRUE	target	{'related': 0.51, 'relates': 0.49}
Factual Knowledge	capital_world	Rabat is to Morocco as Tallinn is to	estonia	Estonia	0.69	1	1	{'Estonia': 0.69, 'which': 0.06, 'what': 0.05, '__': 0.02, '______': 0.02}	0	0.691406	0	1	context	context|target	0.51	TRUE	TRUE	TRUE	target	{'estonia': 0.51, 'tallinn': 0.47}
Factual Knowledge	capital_world	Rabat is to Morocco as Tunis is to	tunisia	Tunisia	0.68	1	1	{'Tunisia': 0.68, 'what': 0.05, '__': 0.04, 'which': 0.03, '______': 0.02}	0	0.675781	0	1	context	context|target	0.51	TRUE	TRUE	TRUE	target	{'tunisia': 0.51, 'tunis': 0.45}
Semantic Relations	antonyms_gradable	sane is to crazy as slow is to	fast	fast	0.68	1	1	{'fast': 0.68, '______': 0.03, '__': 0.02, '_____': 0.02, 'what': 0.01}	0	0.675781	0	1	context	context|target	0.51	TRUE	TRUE	TRUE	target	{'fast': 0.51, 'slow': 0.51}
Verbal & Grammatical Forms	present_participle	going is to go as playing is to	play	play	0.68	1	1	{'play': 0.68, 'go': 0.03, 'played': 0.03, 'plays': 0.01, 'be': 0.01}	0	0.679688	0	1	context	context|target	0.51	TRUE	TRUE	TRUE	target	{'play': 0.51, 'playing': 0.45}
Verbal & Grammatical Forms	noun_plural_irreg	data is to datum as majorities is to	majority	majority	0.68	1	1	{'majority': 0.68, 'major': 0.09, '______': 0.03, '__': 0.02, 'what': 0.02}	0	0.683594	0	1	context	context|target	0.51	TRUE	TRUE	TRUE	target	{'majority': 0.51, 'majorities': 0.48}
Verbal & Grammatical Forms	verb_inf_Ved	followed is to follow as provided is to	provide	provide	0.68	1	1	{'provide': 0.68, 'provided': 0.05, 'be': 0.02, 'providing': 0.01, 'provider': 0.01}	0	0.683594	0	1	context	context|target	0.51	TRUE	TRUE	TRUE	target	{'provide': 0.51, 'provided': 0.49}
Verbal & Grammatical Forms	verb_Ving_Ved	adding is to added as including is to	included	included	0.68	1	1	{'included': 0.68, 'include': 0.05, 'excluded': 0.02, 'add': 0.02, 'added': 0.01}	0	0.683594	0	1	context	context|target	0.51	TRUE	TRUE	TRUE	target	{'included': 0.51, 'including': 0.49}
Verbal & Grammatical Forms	verb_3pSg_Ved	seems is to seemed as spends is to	spent	spent	0.68	1	1	{'spent': 0.68, '______': 0.04, 'spend': 0.04, 'sp': 0.04, '__': 0.01}	0	0.675781	0	1	context	context|target	0.51	TRUE	TRUE	TRUE	target	{'spent': 0.51, 'spends': 0.48}
Morphological Modifiers	noun+less_reg	god is to godless as home is to	homeless	homeless	0.67	1	1	{'homeless': 0.67, 'house': 0.13, 'home': 0.04, 'homelessness': 0.04, 'hom': 0.02}	0	0.667969	0	1	context	context|target	0.51	TRUE	TRUE	TRUE	target	{'homeless': 0.51, 'home': 0.49}
Morphological Modifiers	noun+less_reg	deathless is to death as lawless is to	law	law	0.67	1	1	{'law': 0.67, 'lawful': 0.18, 'justice': 0.03, 'the': 0.01, 'legal': 0.01}	0	0.667969	0	1	context	context|target	0.51	TRUE	TRUE	TRUE	target	{'law': 0.51, 'lawless': 0.49}
Semantic Relations	antonyms_gradable	extravert is to introvert as abnormal is to	normal	normal	0.67	1	1	{'normal': 0.67, '______': 0.03, '': 0.02, 'what': 0.02, 'abnormal': 0.01}	0	0.671875	0	1	context	context|target	0.51	TRUE	TRUE	TRUE	target	{'normal': 0.51, 'abnormal': 0.49}
Semantic Relations	antonyms_gradable	crazy is to sane as fast is to	slow	slow	0.67	1	1	{'slow': 0.67, '_____': 0.03, '______': 0.03, '____': 0.02, '"': 0.01}	0	0.667969	0	1	context	context|target	0.51	TRUE	TRUE	TRUE	target	{'slow': 0.51, 'fast': 0.51}
Verbal & Grammatical Forms	verb_inf_Ving	attending is to attend as teaching is to	teach	teach	0.67	1	1	{'teach': 0.67, 'instruct': 0.04, 'teaching': 0.04, 'learn': 0.03, 'be': 0.02}	0	0.671875	0	1	context	context|target	0.51	TRUE	TRUE	TRUE	target	{'teach': 0.51, 'teaching': 0.48}
Verbal & Grammatical Forms	verb_inf_3pSg	reduces is to reduce as seems is to	seem	seem	0.67	1	1	{'seem': 0.67, 'seems': 0.08, 'see': 0.04, 'appear': 0.02, 'be': 0.02}	0	0.671875	0	1	context	context|target	0.51	TRUE	TRUE	TRUE	target	{'seem': 0.51, 'seems': 0.5}
Verbal & Grammatical Forms	verb_Ving_Ved	introducing is to introduced as replacing is to	replaced	replaced	0.67	1	1	{'replaced': 0.67, '?': 0.04, '': 0.02, '__': 0.02, '______': 0.01}	0	0.671875	0	1	context	context|target	0.51	TRUE	TRUE	TRUE	target	{'replaced': 0.51, 'replacing': 0.49}
Verbal & Grammatical Forms	verb_3pSg_Ved	consisted is to consists as seemed is to	seems	seem	0.67	0.5	1	{'seem': 0.67, 'seems': 0.11, 'see': 0.03, '______': 0.02, '__': 0.01}	1	0.109375	0.5625	0.99999	context	context|target	0.51	TRUE	TRUE	TRUE	target	{'seems': 0.51, 'seemed': 0.5}
Factual Knowledge	country_capital	Hanoi is to Vietnam as London is to	england	England	0.66	1	1	{'England': 0.66, 'the': 0.13, 'Britain': 0.08, 'Great': 0.05, '______': 0.01}	0	0.660156	0	1	context	context|target	0.51	TRUE	TRUE	TRUE	target	{'england': 0.51, 'london': 0.5}
Factual Knowledge	capital_world	Podgorica is to Montenegro as Suva is to	fiji	Fiji	0.66	1	1	{'Fiji': 0.66, '______': 0.04, 'what': 0.03, '__': 0.02, '_____': 0.02}	0	0.664062	0	1	context	context|target	0.51	TRUE	TRUE	TRUE	target	{'fiji': 0.51, 'suva': 0.5}
Factual Knowledge	capital_world	Hanoi is to Vietnam as London is to	england	England	0.66	1	1	{'England': 0.66, 'the': 0.13, 'Britain': 0.08, 'Great': 0.05, '______': 0.01}	0	0.660156	0	1	context	context|target	0.51	TRUE	TRUE	TRUE	target	{'england': 0.51, 'london': 0.5}
Verbal & Grammatical Forms	verb_3pSg_Ved	adds is to added as fails is to	failed	failed	0.66	1	1	{'failed': 0.66, 'subtract': 0.06, 'fails': 0.03, 'fail': 0.02, 'failing': 0.01}	0	0.65625	0	1	context	context|target	0.51	TRUE	TRUE	TRUE	target	{'failed': 0.51, 'fails': 0.47}
Verbal & Grammatical Forms	verb_Ving_Ved	receiving is to received as understanding is to	understood	understood	0.66	1	1	{'understood': 0.66, 'understand': 0.05, '______': 0.04, '__': 0.03, 'understanding': 0.02}	0	0.664062	0	1	context	context|target	0.51	TRUE	TRUE	TRUE	target	{'understood': 0.51, 'understanding': 0.5}
Verbal & Grammatical Forms	verb_Ving_Ved	heard is to hearing as understood is to	understanding	understanding	0.66	1	1	{'understanding': 0.66, 'understood': 0.13, '______': 0.03, 'listening': 0.01, 'hearing': 0.01}	0	0.65625	0	1	context	context|target	0.51	TRUE	TRUE	TRUE	target	{'understanding': 0.51, 'understood': 0.5}
Verbal & Grammatical Forms	verb_3pSg_Ved	introduces is to introduced as loses is to	lost	lost	0.66	1	1	{'lost': 0.66, 'loss': 0.06, 'lose': 0.06, 'lo': 0.04, 'losing': 0.03}	0	0.65625	0	1	context	context|target	0.51	TRUE	TRUE	TRUE	target	{'lost': 0.51, 'loses': 0.5}
Morphological Modifiers	verb+er_irreg	learner is to learn as writer is to	write	write	0.65	1	1	{'write': 0.65, 'writing': 0.05, '______': 0.03, '__': 0.02, 'writer': 0.01}	0	0.648438	0	1	context	context|target	0.51	TRUE	TRUE	TRUE	target	{'write': 0.51, 'writer': 0.49}
Verbal & Grammatical Forms	noun_plural_irreg	economies is to economy as societies is to	society	society	0.65	1	1	{'society': 0.65, 'sociology': 0.06, '______': 0.03, 'social': 0.02, '__': 0.01}	0	0.652344	0	1	context	context|target	0.51	TRUE	TRUE	TRUE	target	{'society': 0.51, 'societies': 0.47}
Verbal & Grammatical Forms	verb_3pSg_Ved	appears is to appeared as receives is to	received	received	0.65	1	1	{'received': 0.65, 'given': 0.03, 'receive': 0.03, 'appeared': 0.01, '': 0.01}	0	0.652344	0	1	context	context|target	0.51	TRUE	TRUE	TRUE	target	{'received': 0.51, 'receives': 0.49}
Factual Knowledge	country_capital	Athens is to Greece as Jakarta is to	indonesia	Indonesia	0.64	1	1	{'Indonesia': 0.64, 'what': 0.03, '______': 0.03, '_____': 0.02, ':': 0.01}	0	0.640625	0	1	context	context|target	0.51	TRUE	TRUE	TRUE	target	{'indonesia': 0.51, 'jakarta': 0.51}
Factual Knowledge	country_capital	Bern is to Switzerland as Dhaka is to	bangladesh	Bangladesh	0.64	1	1	{'Bangladesh': 0.64, '______': 0.03, ':': 0.03, '__': 0.02, 'what': 0.02}	0	0.640625	0	1	context	context|target	0.51	TRUE	TRUE	TRUE	target	{'bangladesh': 0.51, 'dhaka': 0.5}
Factual Knowledge	country_capital	Turkey is to Ankara as Jamaica is to	kingston	Kingston	0.64	1	1	{'Kingston': 0.64, '__': 0.03, ':': 0.03, '"': 0.02, '______': 0.02}	0	0.644531	0	1	context	context|target	0.51	TRUE	TRUE	TRUE	target	{'kingston': 0.51, 'jamaica': 0.5}
Factual Knowledge	capital_world	Athens is to Greece as Jakarta is to	indonesia	Indonesia	0.64	1	1	{'Indonesia': 0.64, 'what': 0.03, '______': 0.03, '_____': 0.02, ':': 0.01}	0	0.640625	0	1	context	context|target	0.51	TRUE	TRUE	TRUE	target	{'indonesia': 0.51, 'jakarta': 0.51}
Factual Knowledge	capital_world	Bern is to Switzerland as Dhaka is to	bangladesh	Bangladesh	0.64	1	1	{'Bangladesh': 0.64, '______': 0.03, ':': 0.03, '__': 0.02, 'what': 0.02}	0	0.640625	0	1	context	context|target	0.51	TRUE	TRUE	TRUE	target	{'bangladesh': 0.51, 'dhaka': 0.5}
Morphological Modifiers	verb+er_irreg	achiever is to achieve as loser is to	lose	lose	0.64	1	1	{'lose': 0.64, 'fail': 0.11, 'win': 0.05, 'be': 0.03, 'succeed': 0.02}	0	0.636719	0	1	context	context|target	0.51	TRUE	TRUE	TRUE	target	{'lose': 0.51, 'loser': 0.51}
Verbal & Grammatical Forms	verb_Ving_3pSg	exists is to existing as involves is to	involving	involving	0.64	1	1	{'involving': 0.64, 'involvement': 0.1, 'involved': 0.09, 'involves': 0.05, 'being': 0.01}	0	0.636719	0	1	context	context|target	0.51	TRUE	TRUE	TRUE	target	{'involving': 0.51, 'involves': 0.5}
Verbal & Grammatical Forms	verb_inf_3pSg	consider is to considers as refer is to	refers	refers	0.64	1	1	{'refers': 0.64, 'refer': 0.08, 'referring': 0.07, 'referred': 0.03, 'references': 0.01}	0	0.644531	0	1	context	context|target	0.51	TRUE	TRUE	TRUE	target	{'refers': 0.51, 'refer': 0.48}
Verbal & Grammatical Forms	verb_inf_3pSg	accept is to accepts as require is to	requires	requires	0.64	1	1	{'requires': 0.64, 'require': 0.05, 'required': 0.03, 'requirements': 0.02, '': 0.02}	0	0.644531	0	1	context	context|target	0.51	TRUE	TRUE	TRUE	target	{'requires': 0.51, 'require': 0.5}
Verbal & Grammatical Forms	verb_inf_Ved	continued is to continue as replaced is to	replace	replace	0.64	1	1	{'replace': 0.64, 'replaced': 0.13, 'be': 0.05, 'repl': 0.02, '': 0.01}	0	0.640625	0	1	context	context|target	0.51	TRUE	TRUE	TRUE	target	{'replace': 0.51, 'replaced': 0.51}
Verbal & Grammatical Forms	verb_Ving_Ved	describing is to described as remaining is to	remained	remain	0.64	0.5	1	{'remain': 0.64, 'remained': 0.04, 'remaining': 0.04, 'described': 0.03, 'be': 0.03}	2	0.0412598	0.603271	0.99998	context	context|target	0.51	TRUE	TRUE	TRUE	target	{'remained': 0.51, 'remaining': 0.48}
Verbal & Grammatical Forms	verb_Ving_Ved	introducing is to introduced as telling is to	told	told	0.64	1	1	{'told': 0.64, '______': 0.04, 'tell': 0.04, '__': 0.03, '____': 0.02}	0	0.640625	0	1	context	context|target	0.51	TRUE	TRUE	TRUE	target	{'told': 0.51, 'telling': 0.48}
Verbal & Grammatical Forms	verb_3pSg_Ved	consists is to consisted as replaces is to	replaced	replaced	0.64	1	1	{'replaced': 0.64, 'replace': 0.09, 'replaces': 0.03, '': 0.01, 'repl': 0.01}	0	0.636719	0	1	context	context|target	0.51	TRUE	TRUE	TRUE	target	{'replaced': 0.51, 'replaces': 0.5}
Morphological Modifiers	adj_comparative	sexier is to sexy as tinier is to	tiny	tiny	0.63	1	1	{'tiny': 0.63, '______': 0.03, 'tin': 0.03, '____': 0.02, '_____': 0.01}	0	0.628906	0	1	context	context|target	0.51	TRUE	TRUE	TRUE	target	{'tiny': 0.51, 'tinier': 0.5}
Verbal & Grammatical Forms	verb_inf_3pSg	consider is to considers as occur is to	occurs	occurs	0.63	1	1	{'occurs': 0.63, 'occur': 0.07, 'occurred': 0.05, 'occ': 0.03, 'occurrences': 0.02}	0	0.628906	0	1	context	context|target	0.51	TRUE	TRUE	TRUE	target	{'occurs': 0.51, 'occur': 0.48}
Verbal & Grammatical Forms	verb_inf_Ving	continuing is to continue as telling is to	tell	tell	0.63	1	1	{'tell': 0.63, 'continue': 0.05, 'be': 0.04, 'listen': 0.02, 'stop': 0.01}	0	0.632812	0	1	context	context|target	0.51	TRUE	TRUE	TRUE	target	{'tell': 0.51, 'telling': 0.49}
Verbal & Grammatical Forms	verb_Ving_Ved	appeared is to appearing as managed is to	managing	managing	0.63	1	1	{'managing': 0.63, 'management': 0.09, 'managed': 0.08, 'un': 0.04, 'being': 0.03}	0	0.632812	0	1	context	context|target	0.51	TRUE	TRUE	TRUE	target	{'managing': 0.51, 'managed': 0.48}
Factual Knowledge	country_capital	Belgrade is to Serbia as Warsaw is to	poland	Poland	0.62	1	1	{'Poland': 0.62, '______': 0.07, '__': 0.03, '_____': 0.02, ':': 0.02}	0	0.617188	0	1	context	context|target	0.51	TRUE	TRUE	TRUE	target	{'poland': 0.51, 'warsaw': 0.5}
Factual Knowledge	country_capital	Syria is to Damascus as Poland is to	warsaw	Warsaw	0.62	1	1	{'Warsaw': 0.62, 'G': 0.05, '______': 0.04, '__': 0.03, 'Krak': 0.03}	0	0.621094	0	1	context	context|target	0.51	TRUE	TRUE	TRUE	target	{'warsaw': 0.51, 'poland': 0.49}
Factual Knowledge	capital_world	Muscat is to Oman as Valletta is to	malta	Malta	0.62	1	1	{'Malta': 0.62, '______': 0.05, '__': 0.05, 'which': 0.04, ':': 0.03}	0	0.621094	0	1	context	context|target	0.51	TRUE	TRUE	TRUE	target	{'malta': 0.51, 'valletta': 0.5}
Morphological Modifiers	re+verb_reg	reassign is to assign as reintegrate is to	integrate	reint	0.62	0	1	{'reint': 0.62, 'integrate': 0.07, 're': 0.06, 'merge': 0.03, 'restore': 0.02}	1	0.0693359	0.547852	0.99999	context	context|target	0.51	TRUE	TRUE	TRUE	target	{'integrate': 0.51, 'reintegrate': 0.49}
Morphological Modifiers	verb+er_irreg	manager is to manage as teacher is to	teach	teach	0.62	1	1	{'teach': 0.62, 'educate': 0.04, '__': 0.03, 'instruct': 0.02, '______': 0.02}	0	0.617188	0	1	context	context|target	0.51	TRUE	TRUE	TRUE	target	{'teach': 0.51, 'teacher': 0.51}
Morphological Modifiers	verb+er_irreg	entertainer is to entertain as teller is to	tell	tell	0.62	1	1	{'tell': 0.62, '': 0.03, '__': 0.02, '____': 0.02, '______': 0.02}	0	0.621094	0	1	context	context|target	0.51	TRUE	TRUE	TRUE	target	{'tell': 0.51, 'teller': 0.47}
Morphological Modifiers	adj+ness_reg	reasonableness is to reasonable as strangeness is to	strange	strange	0.62	1	1	{'strange': 0.62, 'stranger': 0.02, '______': 0.02, '_____': 0.01, 'strang': 0.01}	0	0.617188	0	1	context	context|target	0.51	TRUE	TRUE	TRUE	target	{'strange': 0.51, 'strangeness': 0.5}
Semantic Relations	antonyms_gradable	beautiful is to ugly as large is to	small	small	0.62	1	1	{'small': 0.62, '"': 0.02, '______': 0.02, 'tiny': 0.02, '': 0.02}	0	0.625	0	1	context	context|target	0.51	TRUE	TRUE	TRUE	target	{'small': 0.51, 'large': 0.51}
Verbal & Grammatical Forms	verb_inf_Ving	become is to becoming as remain is to	remaining	remaining	0.62	1	1	{'remaining': 0.62, 'becoming': 0.1, '______': 0.02, '': 0.02, 'staying': 0.02}	0	0.625	0	1	context	context|target	0.51	TRUE	TRUE	TRUE	target	{'remaining': 0.51, 'remain': 0.5}
Verbal & Grammatical Forms	verb_inf_3pSg	continues is to continue as understands is to	understand	understand	0.62	1	1	{'understand': 0.62, 'continue': 0.03, 'be': 0.03, 'understands': 0.01, 'know': 0.01}	0	0.621094	0	1	context	context|target	0.51	TRUE	TRUE	TRUE	target	{'understand': 0.51, 'understands': 0.48}
Verbal & Grammatical Forms	verb_inf_Ved	believe is to believed as consider is to	considered	considered	0.62	1	1	{'considered': 0.62, 'consider': 0.08, '': 0.01, 'consideration': 0.01, '__': 0.01}	0	0.617188	0	1	context	context|target	0.51	TRUE	TRUE	TRUE	target	{'considered': 0.51, 'consider': 0.47}
Verbal & Grammatical Forms	verb_inf_Ving	containing is to contain as developing is to	develop	develop	0.62	1	1	{'develop': 0.62, 'evolve': 0.04, 'development': 0.03, '______': 0.02, '__': 0.02}	0	0.625	0	1	context	context|target	0.51	TRUE	TRUE	TRUE	target	{'develop': 0.51, 'developing': 0.47}
Verbal & Grammatical Forms	verb_inf_Ved	announce is to announced as manage is to	managed	managed	0.62	1	1	{'managed': 0.62, 'management': 0.05, '?': 0.03, '': 0.02, 'manager': 0.02}	0	0.621094	0	1	context	context|target	0.51	TRUE	TRUE	TRUE	target	{'managed': 0.51, 'manage': 0.47}
Verbal & Grammatical Forms	verb_3pSg_Ved	consists is to consisted as seems is to	seemed	seemed	0.62	1	1	{'seemed': 0.62, 'seem': 0.17, 'seems': 0.04, 'seen': 0.03, 'seeming': 0.02}	0	0.621094	0	1	context	context|target	0.51	TRUE	TRUE	TRUE	target	{'seemed': 0.51, 'seems': 0.5}
Factual Knowledge	capital_world	Bratislava is to Slovakia as Jakarta is to	indonesia	Indonesia	0.61	1	1	{'Indonesia': 0.61, '______': 0.04, 'what': 0.04, '__': 0.03, '____': 0.02}	0	0.613281	0	1	context	context|target	0.51	TRUE	TRUE	TRUE	target	{'indonesia': 0.51, 'jakarta': 0.49}
Morphological Modifiers	verb+tion_irreg	illumination is to illumine as realization is to	realize	realize	0.61	1	1	{'realize': 0.61, 'real': 0.12, 'realise': 0.02, 'reality': 0.01, '': 0.01}	0	0.613281	0	1	context	context|target	0.51	TRUE	TRUE	TRUE	target	{'realize': 0.51, 'realization': 0.49}
Morphological Modifiers	noun+less_reg	pathless is to path as remorseless is to	remorse	remorse	0.61	1	1	{'remorse': 0.61, '': 0.03, 'regret': 0.03, ':': 0.02}	0	0.605469	0	1	context	context|target	0.51	TRUE	TRUE	TRUE	target	{'remorse': 0.51, 'remorseless': 0.5}
Semantic Relations	antonyms_gradable	beautiful is to ugly as big is to	small	small	0.61	1	1	{'small': 0.61, 'little': 0.08, '______': 0.02, '____': 0.02, '_____': 0.01}	0	0.613281	0	1	context	context|key	0.51	FALSE	TRUE	TRUE	key	{'big': 0.51, 'small': 0.51}
Verbal & Grammatical Forms	verb_Ving_3pSg	believes is to believing as sits is to	sitting	sitting	0.61	1	1	{'sitting': 0.61, 'sit': 0.07, 'seating': 0.03, 'standing': 0.02, 'seat': 0.02}	0	0.605469	0	1	context	context|target	0.51	TRUE	TRUE	TRUE	target	{'sitting': 0.51, 'sits': 0.51}
Verbal & Grammatical Forms	verb_inf_3pSg	learns is to learn as remembers is to	remember	remember	0.61	1	1	{'remember': 0.61, 'remembers': 0.06, 'recall': 0.05, 'memor': 0.03, 'rec': 0.03}	0	0.605469	0	1	context	context|target	0.51	TRUE	TRUE	TRUE	target	{'remember': 0.51, 'remembers': 0.49}
Verbal & Grammatical Forms	verb_inf_3pSg	involves is to involve as remains is to	remain	remain	0.61	1	1	{'remain': 0.61, 'be': 0.03, 'stay': 0.02, 'remains': 0.01, 'rem': 0.01}	0	0.609375	0	1	context	context|target	0.51	TRUE	TRUE	TRUE	target	{'remain': 0.51, 'remains': 0.48}
Verbal & Grammatical Forms	verb_inf_3pSg	describes is to describe as protects is to	protect	protect	0.61	1	1	{'protect': 0.61, 'protects': 0.16, 'describe': 0.02, 'be': 0.01, '': 0.01}	0	0.609375	0	1	context	context|target	0.51	TRUE	TRUE	TRUE	target	{'protect': 0.51, 'protects': 0.5}
Verbal & Grammatical Forms	verb_inf_3pSg	exists is to exist as remembers is to	remember	remember	0.61	1	1	{'remember': 0.61, 'be': 0.14, 'remembered': 0.03, 'forget': 0.02, 'remembering': 0.01}	0	0.609375	0	1	context	context|target	0.51	TRUE	TRUE	TRUE	target	{'remember': 0.51, 'remembers': 0.49}
Verbal & Grammatical Forms	verb_inf_Ving	learning is to learn as losing is to	lose	win	0.61	0	1	{'win': 0.61, 'winning': 0.09, 'lose': 0.04, 'gain': 0.04, 'learn': 0.01}	3	0.0415039	0.567871	0.99997	context	context|target	0.51	TRUE	TRUE	TRUE	target	{'lose': 0.51, 'losing': 0.48}
Verbal & Grammatical Forms	verb_Ving_Ved	involved is to involving as operated is to	operating	operating	0.61	1	1	{'operating': 0.61, '______': 0.05, '__': 0.04, '': 0.03}	0	0.613281	0	1	context	context|target	0.51	TRUE	TRUE	TRUE	target	{'operating': 0.51, 'operated': 0.47}
Morphological Modifiers	noun+less_reg	bone is to boneless as home is to	homeless	homeless	0.6	1	1	{'homeless': 0.6, '______': 0.04, 'house': 0.04, '?': 0.02}	0	0.597656	0	1	context	context|target	0.51	TRUE	TRUE	TRUE	target	{'homeless': 0.51, 'home': 0.49}
Morphological Modifiers	adj+ly_reg	practically is to practical as virtually is to	virtual	virtual	0.6	1	1	{'virtual': 0.6, 'virtually': 0.06, '______': 0.03, '__': 0.02, '': 0.02}	0	0.601562	0	1	context	context|target	0.51	TRUE	TRUE	TRUE	target	{'virtual': 0.51, 'virtually': 0.5}
Morphological Modifiers	verb+er_irreg	learn is to learner as listen is to	listener	listener	0.6	1	1	{'listener': 0.6, 'learner': 0.08, '______': 0.04, '?': 0.02, '__': 0.02}	0	0.601562	0	1	context	context|target	0.51	TRUE	TRUE	TRUE	target	{'listener': 0.51, 'listen': 0.48}
Verbal & Grammatical Forms	verb_inf_Ving	believe is to believing as understand is to	understanding	understanding	0.6	1	1	{'understanding': 0.6, 'understand': 0.09, '______': 0.03, '__': 0.02, 'knowing': 0.01}	0	0.601562	0	1	context	context|target	0.51	TRUE	TRUE	TRUE	target	{'understanding': 0.51, 'understand': 0.48}
Verbal & Grammatical Forms	verb_Ving_3pSg	describing is to describes as involving is to	involves	involving	0.6	0	1	{'involving': 0.6, 'involve': 0.16, 'involves': 0.04, 'invol': 0.04, 'inv': 0.02}	2	0.0393066	0.55835	0.99998	context	context|target	0.51	TRUE	TRUE	TRUE	target	{'involves': 0.51, 'involving': 0.5}
Verbal & Grammatical Forms	noun_plural_reg	development is to developments as hour is to	hours	hours	0.6	1	1	{'hours': 0.6, 'days': 0.07, 'years': 0.04, 'time': 0.03, 'minutes': 0.02}	0	0.601562	0	1	context	context|target	0.51	TRUE	TRUE	TRUE	target	{'hours': 0.51, 'hour': 0.48}
Verbal & Grammatical Forms	verb_inf_Ving	expecting is to expect as remaining is to	remain	remain	0.6	1	1	{'remain': 0.6, 'remaining': 0.04, 'remainder': 0.03, 'be': 0.02, 'rem': 0.02}	0	0.597656	0	1	context	context|target	0.51	TRUE	TRUE	TRUE	target	{'remain': 0.51, 'remaining': 0.49}
Verbal & Grammatical Forms	verb_inf_Ved	agreed is to agree as enjoyed is to	enjoy	enjoy	0.6	1	1	{'enjoy': 0.6, 'enjoyed': 0.12, 'enjoyment': 0.04, 'en': 0.04, 'enjoying': 0.02}	0	0.597656	0	1	context	context|target	0.51	TRUE	TRUE	TRUE	target	{'enjoy': 0.51, 'enjoyed': 0.49}
Factual Knowledge	capital_world	Iran is to Tehran as Thailand is to	bangkok	Bangkok	0.59	1	1	{'Bangkok': 0.59, '______': 0.05, '__': 0.04, '_____': 0.02, 'what': 0.02}	0	0.585938	0	1	context	context|target	0.51	TRUE	TRUE	TRUE	target	{'bangkok': 0.51, 'thailand': 0.5}
Morphological Modifiers	verb+ment_irreg	engage is to engagement as involve is to	involvement	involvement	0.59	1	1	{'involvement': 0.59, '______': 0.07, '__': 0.04, 'engagement': 0.02, '': 0.02}	0	0.59375	0	1	context	context|target	0.51	TRUE	TRUE	TRUE	target	{'involvement': 0.51, 'involve': 0.49}
Verbal & Grammatical Forms	verb_Ving_Ved	creating is to created as introducing is to	introduced	introduced	0.59	1	1	{'introduced': 0.59, 'introduce': 0.03, '______': 0.03, '': 0.01, '__': 0.01}	0	0.585938	0	1	context	context|target	0.51	TRUE	TRUE	TRUE	target	{'introduced': 0.51, 'introducing': 0.47}
Verbal & Grammatical Forms	verb_Ving_Ved	created is to creating as existed is to	existing	existing	0.59	1	1	{'existing': 0.59, 'exist': 0.1, 'having': 0.08, 'existed': 0.05, 'existence': 0.03}	0	0.589844	0	1	context	context|target	0.51	TRUE	TRUE	TRUE	target	{'existing': 0.51, 'existed': 0.48}
Factual Knowledge	country_capital	Athens is to Greece as Dublin is to	ireland	Ireland	0.58	1	1	{'Ireland': 0.58, '______': 0.07, 'what': 0.04, '_____': 0.03, '____': 0.03}	0	0.578125	0	1	context	context|target	0.51	TRUE	TRUE	TRUE	target	{'ireland': 0.51, 'dublin': 0.49}
Factual Knowledge	capital_world	Athens is to Greece as Dublin is to	ireland	Ireland	0.58	1	1	{'Ireland': 0.58, '______': 0.07, 'what': 0.04, '_____': 0.03, '____': 0.03}	0	0.578125	0	1	context	context|target	0.51	TRUE	TRUE	TRUE	target	{'ireland': 0.51, 'dublin': 0.49}
Verbal & Grammatical Forms	verb_inf_3pSg	agrees is to agree as reduces is to	reduce	reduce	0.58	1	1	{'reduce': 0.58, 'increase': 0.05, 'reduced': 0.03, 'reduces': 0.03, 're': 0.01}	0	0.578125	0	1	context	context|target	0.51	TRUE	TRUE	TRUE	target	{'reduce': 0.51, 'reduces': 0.49}
Verbal & Grammatical Forms	verb_inf_Ved	decided is to decide as replaced is to	replace	replace	0.58	1	1	{'replace': 0.58, 'replaced': 0.1, 'be': 0.08, '': 0.02, 'repl': 0.01}	0	0.578125	0	1	context	context|target	0.51	TRUE	TRUE	TRUE	target	{'replace': 0.51, 'replaced': 0.5}
Verbal & Grammatical Forms	verb_3pSg_Ved	applied is to applies as occurred is to	occurs	occurred	0.58	0	1	{'occurred': 0.58, 'occurrences': 0.03, 'occur': 0.03, 'occured': 0.03, 'occurs': 0.03}	3	0.0308838	0.551147	0.99997	context	context|target	0.51	TRUE	TRUE	TRUE	target	{'occurs': 0.51, 'occurred': 0.5}
Verbal & Grammatical Forms	verb_Ving_Ved	introducing is to introduced as sending is to	sent	sent	0.58	1	1	{'sent': 0.58, 'send': 0.1, '______': 0.03, '__': 0.02, '': 0.02}	0	0.582031	0	1	context	context|target	0.51	TRUE	TRUE	TRUE	target	{'sent': 0.51, 'sending': 0.49}
Factual Knowledge	country_capital	Peru is to Lima as Austria is to	vienna	Vienna	0.57	1	1	{'Vienna': 0.57, '__': 0.06, '______': 0.05, 'what': 0.02, '_____': 0.02}	0	0.574219	0	1	context	context|target	0.51	TRUE	TRUE	TRUE	target	{'vienna': 0.51, 'austria': 0.49}
Factual Knowledge	capital_world	Bratislava is to Slovakia as Bucharest is to	romania	Romania	0.57	1	1	{'Romania': 0.57, 'what': 0.05, 'which': 0.05, '______': 0.03, ':': 0.03}	0	0.574219	0	1	context	context|target	0.51	TRUE	TRUE	TRUE	target	{'romania': 0.51, 'bucharest': 0.48}
Morphological Modifiers	adj_comparative	sexier is to sexy as trickier is to	tricky	tricky	0.57	1	1	{'tricky': 0.57, 'trick': 0.04, '______': 0.04, '_____': 0.02, '': 0.02}	0	0.566406	0	1	context	context|target	0.51	TRUE	TRUE	TRUE	target	{'tricky': 0.51, 'trickier': 0.51}
Morphological Modifiers	verb+tion_irreg	authorize is to authorization as derive is to	derivation	derivation	0.57	1	1	{'derivation': 0.57, 'deduction': 0.04, '______': 0.03, '__': 0.03, 'derivative': 0.02}	0	0.574219	0	1	context	context|target	0.51	TRUE	TRUE	TRUE	target	{'derivation': 0.51, 'derive': 0.49}
Morphological Modifiers	noun+less_reg	goalless is to goal as soulless is to	soul	soul	0.57	1	1	{'soul': 0.57, '____': 0.04, '______': 0.02, '': 0.02}	0	0.574219	0	1	context	context|target	0.51	TRUE	TRUE	TRUE	target	{'soul': 0.51, 'soulless': 0.49}
Morphological Modifiers	re+verb_reg	reassign is to assign as reinvest is to	invest	invest	0.57	1	1	{'invest': 0.57, 'rein': 0.13, '__': 0.02, '______': 0.02, 're': 0.02}	0	0.566406	0	1	context	context|target	0.51	TRUE	TRUE	TRUE	target	{'invest': 0.51, 'reinvest': 0.47}
Morphological Modifiers	adj+ness_reg	markedness is to marked as vastness is to	vast	vast	0.57	1	1	{'vast': 0.57, 'v': 0.05, 'limited': 0.01, 'small': 0.01, 'spacious': 0.01}	0	0.574219	0	1	context	context|target	0.51	TRUE	TRUE	TRUE	target	{'vast': 0.51, 'vastness': 0.49}
Verbal & Grammatical Forms	verb_Ving_3pSg	becoming is to becomes as following is to	follows	follow	0.57	0.5	1	{'follow': 0.57, 'follows': 0.12, 'followed': 0.03, '__': 0.02, '______': 0.02}	1	0.120117	0.454102	0.99999	context	context|target	0.51	TRUE	TRUE	TRUE	target	{'follows': 0.51, 'following': 0.5}
Verbal & Grammatical Forms	past_tense	spent is to spending as looked is to	looking	looking	0.57	1	1	{'looking': 0.57, 'seeing': 0.08, 'look': 0.04, '______': 0.03, 'looked': 0.02}	0	0.566406	0	1	context	context|target	0.51	TRUE	TRUE	TRUE	target	{'looking': 0.51, 'looked': 0.49}
Verbal & Grammatical Forms	verb_inf_3pSg	learns is to learn as reduces is to	reduce	reduce	0.57	1	1	{'reduce': 0.57, 'add': 0.02, 'reduces': 0.02, 'reducing': 0.01, 'learn': 0.01}	0	0.570312	0	1	context	context|target	0.51	TRUE	TRUE	TRUE	target	{'reduce': 0.51, 'reduces': 0.5}
Verbal & Grammatical Forms	verb_inf_3pSg	requires is to require as sends is to	send	send	0.57	1	1	{'send': 0.57, 'be': 0.02, 'sent': 0.02, 'require': 0.02, 'receive': 0.02}	0	0.574219	0	1	context	context|target	0.51	TRUE	TRUE	TRUE	target	{'send': 0.51, 'sends': 0.5}
Verbal & Grammatical Forms	verb_inf_Ved	became is to become as identified is to	identify	identify	0.57	1	1	{'identify': 0.57, 'be': 0.16, 'become': 0.15, 'have': 0.01, 'identity': 0.01}	0	0.566406	0	1	context	context|target	0.51	TRUE	TRUE	TRUE	target	{'identify': 0.51, 'identified': 0.48}
Verbal & Grammatical Forms	verb_inf_Ved	believe is to believed as expect is to	expected	expected	0.57	1	1	{'expected': 0.57, 'expect': 0.06, 'expectation': 0.03, '______': 0.03, '__': 0.02}	0	0.574219	0	1	context	context|target	0.51	TRUE	TRUE	TRUE	target	{'expected': 0.51, 'expect': 0.49}
Verbal & Grammatical Forms	verb_3pSg_Ved	appears is to appeared as contains is to	contained	contained	0.57	1	1	{'contained': 0.57, 'contains': 0.16, 'contain': 0.05, 'containing': 0.02, 'appears': 0.02}	0	0.566406	0	1	context	context|target	0.51	TRUE	TRUE	TRUE	target	{'contained': 0.51, 'contains': 0.5}
Verbal & Grammatical Forms	verb_inf_Ving	involving is to involve as spending is to	spend	spend	0.57	1	1	{'spend': 0.57, 'expend': 0.03, 'be': 0.03, 'consume': 0.03, '': 0.03}	0	0.574219	0	1	context	context|target	0.51	TRUE	TRUE	TRUE	target	{'spend': 0.51, 'spending': 0.51}
Verbal & Grammatical Forms	verb_inf_Ved	accept is to accepted as unite is to	united	united	0.57	1	1	{'united': 0.57, '______': 0.04, '__': 0.02, '': 0.02}	0	0.566406	0	1	context	context|target	0.51	TRUE	TRUE	TRUE	target	{'united': 0.51, 'unite': 0.48}
Verbal & Grammatical Forms	verb_Ving_Ved	operated is to operating as reduced is to	reducing	reduced	0.57	0	1	{'reduced': 0.57, 'reducing': 0.08, 'reduce': 0.06, 'operated': 0.04, 'reduction': 0.04}	1	0.0830078	0.491211	0.99999	context	context|target	0.51	TRUE	TRUE	TRUE	target	{'reducing': 0.51, 'reduced': 0.5}
Morphological Modifiers	verb+able_reg	publish is to publishable as rely is to	reliable	reliable	0.56	1	1	{'reliable': 0.56, 'reliant': 0.06, 'rel': 0.02, '': 0.02, '?': 0.01}	0	0.558594	0	1	context	context|target	0.51	TRUE	TRUE	TRUE	target	{'reliable': 0.51, 'rely': 0.5}
Morphological Modifiers	noun+less_reg	emotionless is to emotion as tactless is to	tact	tact	0.56	1	1	{'tact': 0.56, '______': 0.06, '': 0.02, '_____': 0.02}	0	0.5625	0	1	context	context|target	0.51	TRUE	TRUE	TRUE	target	{'tact': 0.51, 'tactless': 0.49}
Morphological Modifiers	verb+er_irreg	announcer is to announce as learner is to	learn	learn	0.56	1	1	{'learn': 0.56, 'listen': 0.02, '______': 0.02, 'study': 0.02, 'memor': 0.02}	0	0.558594	0	1	context	context|target	0.51	TRUE	TRUE	TRUE	target	{'learn': 0.51, 'learner': 0.49}
Semantic Relations	antonyms_binary	dead is to alive as in is to	out	out	0.56	1	1	{'out': 0.56, 'on': 0.13, 'not': 0.03, 'into': 0.02, 'in': 0.02}	0	0.5625	0	1	context	context|target	0.51	TRUE	TRUE	TRUE	target	{'out': 0.51, 'in': 0.48}
Verbal & Grammatical Forms	verb_inf_Ved	believed is to believe as considered is to	consider	consider	0.56	1	1	{'consider': 0.56, 'be': 0.08, 'conceive': 0.04, 'considered': 0.03, 'believe': 0.02}	0	0.5625	0	1	context	context|target	0.51	TRUE	TRUE	TRUE	target	{'consider': 0.51, 'considered': 0.47}
Verbal & Grammatical Forms	verb_3pSg_Ved	appears is to appeared as creates is to	created	created	0.56	1	1	{'created': 0.56, 'create': 0.08, 'creates': 0.06, 'creation': 0.04, '': 0.02}	0	0.5625	0	1	context	context|target	0.51	TRUE	TRUE	TRUE	target	{'created': 0.51, 'creates': 0.48}
Factual Knowledge	capital_world	Oslo is to Norway as Tripoli is to	libya	Libya	0.55	1	1	{'Libya': 0.55, '___': 0.03, ':': 0.03, '______': 0.02, '____': 0.02}	0	0.554688	0	1	context	context|target	0.51	TRUE	TRUE	TRUE	target	{'libya': 0.51, 'tripoli': 0.48}
Morphological Modifiers	verb+ment_irreg	embarrassment is to embarrass as enforcement is to	enforce	enforce	0.55	1	1	{'enforce': 0.55, '______': 0.05, 'en': 0.04, '': 0.03, 'force': 0.03}	0	0.546875	0	1	context	context|target	0.51	TRUE	TRUE	TRUE	target	{'enforce': 0.51, 'enforcement': 0.49}
Morphological Modifiers	adj+ness_reg	creativeness is to creative as obviousness is to	obvious	obvious	0.55	1	1	{'obvious': 0.55, '______': 0.03, '__': 0.02, '_____': 0.01, 'evident': 0.01}	0	0.550781	0	1	context	context|target	0.51	TRUE	TRUE	TRUE	target	{'obvious': 0.51, 'obviousness': 0.5}
Morphological Modifiers	adj+ness_reg	creative is to creativeness as serious is to	seriousness	seriousness	0.55	1	1	{'seriousness': 0.55, 'serious': 0.04, '': 0.02, '______': 0.03}	0	0.550781	0	1	context	context|target	0.51	TRUE	TRUE	TRUE	target	{'seriousness': 0.51, 'serious': 0.49}
Morphological Modifiers	verb+er_irreg	determiner is to determine as organiser is to	organise	organise	0.55	1	1	{'organise': 0.55, 'organize': 0.2, 'organisation': 0.05, 'organ': 0.03, '': 0.01}	0	0.554688	0	1	context	context|target	0.51	TRUE	TRUE	TRUE	target	{'organise': 0.51, 'organiser': 0.5}
Verbal & Grammatical Forms	verb_inf_3pSg	occurs is to occur as reduces is to	reduce	reduce	0.55	1	1	{'reduce': 0.55, 'be': 0.14, 'occur': 0.11, 'reduced': 0.01, '': 0.01}	0	0.550781	0	1	context	context|target	0.51	TRUE	TRUE	TRUE	target	{'reduce': 0.51, 'reduces': 0.49}
Verbal & Grammatical Forms	verb_inf_3pSg	describes is to describe as reduces is to	reduce	reduce	0.55	1	1	{'reduce': 0.55, 'describe': 0.03, 'explain': 0.02, 'make': 0.01, 're': 0.01}	0	0.546875	0	1	context	context|target	0.51	TRUE	TRUE	TRUE	target	{'reduce': 0.51, 'reduces': 0.49}
Verbal & Grammatical Forms	verb_inf_Ving	expecting is to expect as promoting is to	promote	promote	0.55	1	1	{'promote': 0.55, 'promoting': 0.03, 'advertise': 0.02, 'promotion': 0.02, 'encourage': 0.01}	0	0.550781	0	1	context	context|target	0.51	TRUE	TRUE	TRUE	target	{'promote': 0.51, 'promoting': 0.47}
Verbal & Grammatical Forms	verb_inf_Ving	maintain is to maintaining as seem is to	seeming	seeming	0.55	1	1	{'seeming': 0.55, '______': 0.05, 'seeing': 0.04, '__': 0.04, '': 0.03}	0	0.546875	0	1	context	context|target	0.51	TRUE	TRUE	TRUE	target	{'seeming': 0.51, 'seem': 0.48}
Verbal & Grammatical Forms	verb_inf_Ved	accept is to accepted as announce is to	announced	announced	0.55	1	1	{'announced': 0.55, 'announcement': 0.05, '______': 0.04, '': 0.03, '__': 0.03}	0	0.554688	0	1	context	context|target	0.51	TRUE	TRUE	TRUE	target	{'announced': 0.51, 'announce': 0.49}
Factual Knowledge	country_capital	Beijing is to China as Dhaka is to	bangladesh	Bangladesh	0.54	1	1	{'Bangladesh': 0.54, '______': 0.06, 'what': 0.05, '__': 0.03, ':': 0.03}	0	0.539062	0	1	context	context|target	0.51	TRUE	TRUE	TRUE	target	{'bangladesh': 0.51, 'dhaka': 0.5}
Factual Knowledge	capital_world	Beijing is to China as Dhaka is to	bangladesh	Bangladesh	0.54	1	1	{'Bangladesh': 0.54, '______': 0.06, 'what': 0.05, '__': 0.03, ':': 0.03}	0	0.539062	0	1	context	context|target	0.51	TRUE	TRUE	TRUE	target	{'bangladesh': 0.51, 'dhaka': 0.5}
Morphological Modifiers	adj+ness_reg	hotness is to hot as strangeness is to	strange	strange	0.54	1	1	{'strange': 0.54, 'strang': 0.06, '______': 0.02, '_____': 0.01, '"': 0.01}	0	0.535156	0	1	context	context|target	0.51	TRUE	TRUE	TRUE	target	{'strange': 0.51, 'strangeness': 0.49}
Morphological Modifiers	adj+ness_reg	competitiveness is to competitive as seriousness is to	serious	serious	0.54	1	1	{'serious': 0.54, '______': 0.03, '__': 0.03, '': 0.01}	0	0.542969	0	1	context	context|target	0.51	TRUE	TRUE	TRUE	target	{'serious': 0.51, 'seriousness': 0.49}
Morphological Modifiers	un+adj_reg	unacceptable is to acceptable as unconditional is to	conditional	conditional	0.54	1	1	{'conditional': 0.54, '______': 0.04, '__': 0.03, '____': 0.02, '': 0.02}	0	0.539062	0	1	context	context|target	0.51	TRUE	TRUE	TRUE	target	{'conditional': 0.51, 'unconditional': 0.51}
Morphological Modifiers	adj+ly_reg	practical is to practically as virtual is to	virtually	virtually	0.54	1	1	{'virtually': 0.54, 'virtual': 0.06, '______': 0.03, '__': 0.03, 'theoretically': 0.02}	0	0.535156	0	1	context	context|target	0.51	TRUE	TRUE	TRUE	target	{'virtually': 0.51, 'virtual': 0.5}
Morphological Modifiers	verb+er_irreg	determiner is to determine as publisher is to	publish	publish	0.54	1	1	{'publish': 0.54, 'print': 0.04, 'publisher': 0.03, 'produce': 0.03, 'determine': 0.02}	0	0.539062	0	1	context	context|target	0.51	TRUE	TRUE	TRUE	target	{'publish': 0.51, 'publisher': 0.46}
Verbal & Grammatical Forms	verb_Ving_3pSg	believes is to believing as hears is to	hearing	hearing	0.54	1	1	{'hearing': 0.54, 'hears': 0.08, 'listening': 0.05, 'believing': 0.03, '______': 0.02}	0	0.535156	0	1	context	context|target	0.51	TRUE	TRUE	TRUE	target	{'hearing': 0.51, 'hears': 0.5}
Verbal & Grammatical Forms	verb_Ving_3pSg	appearing is to appears as consisting is to	consists	consist	0.54	0.5	1	{'consist': 0.54, 'consists': 0.08, 'be': 0.06, 'appear': 0.04, 'to': 0.02}	1	0.0825195	0.456543	0.99999	context	context|target	0.51	TRUE	TRUE	TRUE	target	{'consists': 0.51, 'consisting': 0.47}
Verbal & Grammatical Forms	verb_inf_3pSg	consider is to considers as involve is to	involves	involves	0.54	1	1	{'involves': 0.54, 'involved': 0.1, 'involve': 0.04, 'involvement': 0.04, 'inv': 0.03}	0	0.542969	0	1	context	context|target	0.51	TRUE	TRUE	TRUE	target	{'involves': 0.51, 'involve': 0.46}
Verbal & Grammatical Forms	verb_inf_Ving	maintaining is to maintain as providing is to	provide	provide	0.54	1	1	{'provide': 0.54, 'maintain': 0.05, 'give': 0.04, 'supply': 0.03, 'produce': 0.02}	0	0.535156	0	1	context	context|target	0.51	TRUE	TRUE	TRUE	target	{'provide': 0.51, 'providing': 0.49}
Verbal & Grammatical Forms	verb_Ving_Ved	involving is to involved as operating is to	operated	operated	0.54	1	1	{'operated': 0.54, 'operate': 0.09, 'involved': 0.02, '': 0.02, '"': 0.02}	0	0.535156	0	1	context	context|target	0.51	TRUE	TRUE	TRUE	target	{'operated': 0.51, 'operating': 0.47}
Verbal & Grammatical Forms	verb_3pSg_Ved	expects is to expected as happens is to	happened	happened	0.54	1	1	{'happened': 0.54, 'happens': 0.24, 'happen': 0.02, '______': 0.01, 'happening': 0.01}	0	0.535156	0	1	context	context|target	0.51	TRUE	TRUE	TRUE	target	{'happened': 0.51, 'happens': 0.49}
Verbal & Grammatical Forms	verb_3pSg_Ved	continued is to continues as received is to	receives	received	0.54	0	1	{'received': 0.54, 'receives': 0.11, 'receive': 0.06, 'receiving': 0.04, 'receipt': 0.03}	1	0.105469	0.429688	0.99999	context	context|target	0.51	TRUE	TRUE	TRUE	target	{'receives': 0.51, 'received': 0.49}
Verbal & Grammatical Forms	verb_Ving_Ved	allowing is to allowed as containing is to	contained	contained	0.54	1	1	{'contained': 0.54, 'allowed': 0.06, 'contain': 0.04, 'forbidden': 0.02, 'allow': 0.01}	0	0.542969	0	1	context	context|target	0.51	TRUE	TRUE	TRUE	target	{'contained': 0.51, 'containing': 0.49}
Morphological Modifiers	verb+able_reg	editable is to edit as executable is to	execute	execute	0.53	1	1	{'execute': 0.53, 'run': 0.26, 'do': 0.01, 'executable': 0.01, 'exec': 0.01}	0	0.527344	0	1	context	context|target	0.51	TRUE	TRUE	TRUE	target	{'execute': 0.51, 'executable': 0.49}
Verbal & Grammatical Forms	verb_inf_Ving	adding is to add as allowing is to	allow	allow	0.53	1	1	{'allow': 0.53, 'permit': 0.09, 'add': 0.01, 'be': 0.01, 'not': 0.01}	0	0.53125	0	1	context	context|target	0.51	TRUE	TRUE	TRUE	target	{'allow': 0.51, 'allowing': 0.47}
Verbal & Grammatical Forms	verb_inf_3pSg	refer is to refers as send is to	sends	sends	0.53	1	1	{'sends': 0.53, 'sent': 0.28, 'send': 0.03, 'sending': 0.02, 'goes': 0.01}	0	0.527344	0	1	context	context|target	0.51	TRUE	TRUE	TRUE	target	{'sends': 0.51, 'send': 0.51}
Verbal & Grammatical Forms	verb_3pSg_Ved	expected is to expects as managed is to	manages	manages	0.53	1	1	{'manages': 0.53, 'managed': 0.1, 'managing': 0.05, 'manage': 0.05, 'man': 0.05}	0	0.527344	0	1	context	context|target	0.51	TRUE	TRUE	TRUE	target	{'manages': 0.51, 'managed': 0.48}
Factual Knowledge	capital_world	Warsaw is to Poland as Belgrade is to	serbia	Serbia	0.52	1	1	{'Serbia': 0.52, 'what': 0.06, 'Yugoslavia': 0.05, '______': 0.05, '__': 0.03}	0	0.523438	0	1	context	context|target	0.51	TRUE	TRUE	TRUE	target	{'serbia': 0.51, 'belgrade': 0.5}
Morphological Modifiers	adj_comparative	sexier is to sexy as vaguer is to	vague	vague	0.52	1	1	{'vague': 0.52, '______': 0.06, '____': 0.03, '_____': 0.03, 'vag': 0.02}	0	0.519531	0	1	context	context|target	0.51	TRUE	TRUE	TRUE	target	{'vague': 0.51, 'vaguer': 0.49}
Morphological Modifiers	verb+er_irreg	offender is to offend as provider is to	provide	provide	0.52	1	1	{'provide': 0.52, 'provider': 0.06, '______': 0.02, '__': 0.02, 'receive': 0.01}	0	0.523438	0	1	context	context|target	0.51	TRUE	TRUE	TRUE	target	{'provide': 0.51, 'provider': 0.48}
Semantic Relations	antonyms_binary	southwest is to southeast as down is to	up	up	0.52	1	1	{'up': 0.52, 'what': 0.05, '"': 0.03, '': 0.02, 'north': 0.02}	0	0.519531	0	1	context	context|target	0.51	TRUE	TRUE	TRUE	target	{'up': 0.51, 'down': 0.47}
Semantic Relations	antonyms_gradable	cold is to hot as poor is to	rich	rich	0.52	1	1	{'rich': 0.52, 'wealthy': 0.07, '_____': 0.03, '______': 0.02, '"': 0.02}	0	0.523438	0	1	context	context|target	0.51	TRUE	TRUE	TRUE	target	{'rich': 0.51, 'poor': 0.5}
Semantic Relations	antonyms_gradable	beautiful is to ugly as tight is to	loose	loose	0.52	1	1	{'loose': 0.52, '"': 0.02, '': 0.02, '______': 0.02, 'what': 0.02}	0	0.515625	0	1	context	context|target	0.51	TRUE	TRUE	TRUE	target	{'loose': 0.51, 'tight': 0.5}
Verbal & Grammatical Forms	verb_Ving_3pSg	involving is to involves as representing is to	represents	represents	0.52	1	1	{'represents': 0.52, 'represent': 0.13, '': 0.04, '__': 0.02, 'rep': 0.02}	0	0.515625	0	1	context	context|target	0.51	TRUE	TRUE	TRUE	target	{'represents': 0.51, 'representing': 0.46}
Verbal & Grammatical Forms	verb_inf_3pSg	become is to becomes as require is to	requires	requires	0.52	1	1	{'requires': 0.52, 'required': 0.07, '': 0.04, '__': 0.02}	0	0.523438	0	1	context	context|target	0.51	TRUE	TRUE	TRUE	target	{'requires': 0.51, 'require': 0.5}
Verbal & Grammatical Forms	verb_inf_3pSg	reduces is to reduce as understands is to	understand	understand	0.52	1	1	{'understand': 0.52, 'understands': 0.18, 'understanding': 0.05, '': 0.01}	0	0.519531	0	1	context	context|target	0.51	TRUE	TRUE	TRUE	target	{'understand': 0.51, 'understands': 0.48}
Verbal & Grammatical Forms	verb_inf_Ved	describe is to described as understand is to	understood	understood	0.52	1	1	{'understood': 0.52, 'understand': 0.12, 'understanding': 0.12, '__': 0.02, '______': 0.02}	0	0.515625	0	1	context	context|target	0.51	TRUE	TRUE	TRUE	target	{'understood': 0.51, 'understand': 0.49}
Verbal & Grammatical Forms	verb_inf_Ved	accept is to accepted as reduce is to	reduced	reduced	0.52	1	1	{'reduced': 0.52, '': 0.02, '______': 0.02, 'reduction': 0.02}	0	0.515625	0	1	context	context|target	0.51	TRUE	TRUE	TRUE	target	{'reduced': 0.51, 'reduce': 0.51}
Verbal & Grammatical Forms	verb_Ving_Ved	heard is to hearing as told is to	telling	telling	0.52	1	1	{'telling': 0.52, '______': 0.06, 'saying': 0.03, 'hearing': 0.03, '__': 0.03}	0	0.519531	0	1	context	context|target	0.51	TRUE	TRUE	TRUE	target	{'telling': 0.51, 'told': 0.48}
Verbal & Grammatical Forms	verb_3pSg_Ved	consisted is to consists as lost is to	loses	lose	0.52	0.5	1	{'lose': 0.52, 'lost': 0.17, 'loose': 0.03, 'loss': 0.03, 'loses': 0.03}	4	0.0290527	0.486572	0.99996	context	context|target	0.51	TRUE	TRUE	TRUE	target	{'loses': 0.51, 'lost': 0.5}
Factual Knowledge	country_capital	China is to Beijing as Japan is to	tokyo	Tokyo	0.51	1	1	{'Tokyo': 0.51, '______': 0.06, '__': 0.04, '____': 0.02, '': 0.02}	0	0.507812	0	1	context	context|target	0.51	TRUE	TRUE	TRUE	target	{'tokyo': 0.51, 'japan': 0.49}
Factual Knowledge	country_capital	Hanoi is to Vietnam as Islamabad is to	pakistan	Pakistan	0.51	1	1	{'Pakistan': 0.51, '______': 0.08, '__': 0.04, ':': 0.03, 'what': 0.03}	0	0.511719	0	1	context	context|target	0.51	TRUE	TRUE	TRUE	target	{'pakistan': 0.51, 'islamabad': 0.5}
Factual Knowledge	capital_world	Hanoi is to Vietnam as Islamabad is to	pakistan	Pakistan	0.51	1	1	{'Pakistan': 0.51, '______': 0.08, '__': 0.04, ':': 0.03, 'what': 0.03}	0	0.511719	0	1	context	context|target	0.51	TRUE	TRUE	TRUE	target	{'pakistan': 0.51, 'islamabad': 0.5}
Factual Knowledge	capital_world	China is to Beijing as Japan is to	tokyo	Tokyo	0.51	1	1	{'Tokyo': 0.51, '______': 0.06, '__': 0.04, '____': 0.02, '': 0.02}	0	0.507812	0	1	context	context|target	0.51	TRUE	TRUE	TRUE	target	{'tokyo': 0.51, 'japan': 0.49}
Morphological Modifiers	verb+able_reg	executable is to execute as preventable is to	prevent	prevent	0.51	1	1	{'prevent': 0.51, 'be': 0.06, 'avoid': 0.02, 'make': 0.01, 'not': 0.01}	0	0.511719	0	1	context	context|target	0.51	TRUE	TRUE	TRUE	target	{'prevent': 0.51, 'preventable': 0.49}
Morphological Modifiers	verb+able_reg	believeable is to believe as replaceable is to	replace	replace	0.51	1	1	{'replace': 0.51, 'irre': 0.05, 'ir': 0.04, 'be': 0.03, 'believe': 0.02}	0	0.507812	0	1	context	context|target	0.51	TRUE	TRUE	TRUE	target	{'replace': 0.51, 'replaceable': 0.51}
Verbal & Grammatical Forms	plural_verbs	describes is to describe as provides is to	provide	provide	0.51	1	1	{'provide': 0.51, 'provides': 0.15, 'describe': 0.04, '': 0.01, 'providing': 0.01}	0	0.507812	0	1	context	context|target	0.51	TRUE	TRUE	TRUE	target	{'provide': 0.51, 'provides': 0.5}
Verbal & Grammatical Forms	verb_inf_3pSg	describes is to describe as provides is to	provide	provide	0.51	1	1	{'provide': 0.51, 'provides': 0.15, 'describe': 0.04, '': 0.01, 'providing': 0.01}	0	0.507812	0	1	context	context|target	0.51	TRUE	TRUE	TRUE	target	{'provide': 0.51, 'provides': 0.5}
Verbal & Grammatical Forms	verb_3pSg_Ved	allows is to allowed as decides is to	decided	decided	0.51	1	1	{'decided': 0.51, 'decision': 0.07, 'decides': 0.06, 'decide': 0.04, 'allowed': 0.03}	0	0.507812	0	1	context	context|target	0.51	TRUE	TRUE	TRUE	target	{'decided': 0.51, 'decides': 0.48}
Verbal & Grammatical Forms	verb_3pSg_Ved	agreed is to agrees as seemed is to	seems	seems	0.51	1	1	{'seems': 0.51, 'seemed': 0.18, '______': 0.04, 'seem': 0.02, '__': 0.02}	0	0.511719	0	1	context	context|target	0.51	TRUE	TRUE	TRUE	target	{'seems': 0.51, 'seemed': 0.48}
Verbal & Grammatical Forms	verb_inf_Ving	protecting is to protect as sitting is to	sit	sitting	0.51	0	1	{'sitting': 0.51, 'sit': 0.21, 'be': 0.02, 'walking': 0.02, 'seating': 0.01}	1	0.213867	0.297852	0.99999	context	context|target	0.51	TRUE	TRUE	TRUE	target	{'sit': 0.51, 'sitting': 0.45}
Verbal & Grammatical Forms	verb_inf_Ved	accept is to accepted as identify is to	identified	identified	0.51	1	1	{'identified': 0.51, 'identification': 0.07, 'identity': 0.04, '______': 0.03, '': 0.03}	0	0.511719	0	1	context	context|target	0.51	TRUE	TRUE	TRUE	target	{'identified': 0.51, 'identify': 0.49}
Morphological Modifiers	verb+tion_irreg	degradation is to degrade as visualization is to	visualize	visualize	0.5	1	1	{'visualize': 0.5, 'see': 0.12, '': 0.04, 'vis': 0.04, 'visual': 0.03}	0	0.503906	0	1	context	context|target	0.51	TRUE	TRUE	TRUE	target	{'visualize': 0.51, 'visualization': 0.5}
Morphological Modifiers	verb+er_irreg	examiner is to examine as learner is to	learn	learn	0.5	1	1	{'learn': 0.5, 'study': 0.09, 'be': 0.07, 'examine': 0.03, '': 0.02}	0	0.503906	0	1	context	context|target	0.51	TRUE	TRUE	TRUE	target	{'learn': 0.51, 'learner': 0.5}
Morphological Modifiers	re+verb_reg	assign is to reassign as solve is to	resolve	solve	0.5	0	1	{'solve': 0.5, 'resolve': 0.07, 'find': 0.02, 'assign': 0.02, 'calculate': 0.01}	1	0.0673828	0.428711	0.99999	context	context|target	0.51	TRUE	TRUE	TRUE	target	{'resolve': 0.51, 'solve': 0.49}
Verbal & Grammatical Forms	verb_inf_3pSg	consider is to considers as protect is to	protects	protects	0.5	1	1	{'protects': 0.5, 'protected': 0.07, 'protection': 0.04, 'protect': 0.03, 'protector': 0.03}	0	0.503906	0	1	context	context|target	0.51	TRUE	TRUE	TRUE	target	{'protects': 0.51, 'protect': 0.5}
Verbal & Grammatical Forms	verb_inf_3pSg	describes is to describe as improves is to	improve	improve	0.5	1	1	{'improve': 0.5, 'make': 0.02, 'describe': 0.02, 'improves': 0.02, 'improv': 0.01}	0	0.503906	0	1	context	context|target	0.51	TRUE	TRUE	TRUE	target	{'improve': 0.51, 'improves': 0.5}
Verbal & Grammatical Forms	noun_plural_irreg	data is to datum as duties is to	duty	duty	0.5	1	1	{'duty': 0.5, 'due': 0.04, '______': 0.03, '__': 0.02, 'du': 0.02}	0	0.5	0	1	context	context|target	0.51	TRUE	TRUE	TRUE	target	{'duty': 0.51, 'duties': 0.5}
Verbal & Grammatical Forms	verb_inf_Ved	follow is to followed as involve is to	involved	involved	0.5	1	1	{'involved': 0.5, '': 0.03, '?': 0.02, 'invol': 0.02}	0	0.503906	0	1	context	context|target	0.51	TRUE	TRUE	TRUE	target	{'involved': 0.51, 'involve': 0.5}
Verbal & Grammatical Forms	verb_inf_Ving	encouraging is to encourage as involving is to	involve	involve	0.5	1	1	{'involve': 0.5, 'engage': 0.12, '': 0.02, 'be': 0.02, 'invite': 0.01}	0	0.503906	0	1	context	context|target	0.51	TRUE	TRUE	TRUE	target	{'involve': 0.51, 'involving': 0.47}
Verbal & Grammatical Forms	verb_Ving_Ved	expected is to expecting as remained is to	remaining	remaining	0.5	1	1	{'remaining': 0.5, 'remained': 0.11, 'remain': 0.1, 'rem': 0.03, '______': 0.03}	0	0.503906	0	1	context	context|target	0.51	TRUE	TRUE	TRUE	target	{'remaining': 0.51, 'remained': 0.48}
Verbal & Grammatical Forms	verb_3pSg_Ved	expected is to expects as happened is to	happens	happened	0.5	0	1	{'happened': 0.5, 'happens': 0.09, 'has': 0.06, 'expected': 0.04, 'have': 0.04}	1	0.0874023	0.412598	0.99999	context	context|target	0.51	TRUE	TRUE	TRUE	target	{'happens': 0.51, 'happened': 0.49}
Verbal & Grammatical Forms	verb_Ving_Ved	allowed is to allowing as decided is to	deciding	deciding	0.5	1	1	{'deciding': 0.5, 'decided': 0.13, 'decision': 0.1, 'decide': 0.08, 'dec': 0.01}	0	0.5	0	1	context	context|target	0.51	TRUE	TRUE	TRUE	target	{'deciding': 0.51, 'decided': 0.5}
Verbal & Grammatical Forms	verb_3pSg_Ved	happens is to happened as occurs is to	occurred	occurs	0.5	0	1	{'occurs': 0.5, 'occur': 0.22, 'occurred': 0.14, 'occured': 0.02, 'occ': 0.02}	2	0.143555	0.356445	0.99998	context	context|target	0.51	TRUE	TRUE	TRUE	target	{'occurred': 0.51, 'occurs': 0.5}
Factual Knowledge	capital_world	Iran is to Tehran as England is to	london	London	0.49	1	1	{'London': 0.49, '______': 0.1, '__': 0.05, '': 0.03, ':': 0.02}	0	0.488281	0	1	context	context|target	0.51	TRUE	TRUE	TRUE	target	{'london': 0.51, 'england': 0.5}
Factual Knowledge	capital_world	Canada is to Ottawa as Iraq is to	baghdad	Baghdad	0.49	1	1	{'Baghdad': 0.49, '______': 0.09, '__': 0.07, '____': 0.02, 'Bag': 0.02}	0	0.492188	0	1	context	context|target	0.51	TRUE	TRUE	TRUE	target	{'baghdad': 0.51, 'iraq': 0.48}
Morphological Modifiers	verb+ment_irreg	assess is to assessment as invest is to	investment	investment	0.49	1	1	{'investment': 0.49, '______': 0.05, 'investor': 0.05, '____': 0.03, '__': 0.02}	0	0.494141	0	1	context	context|target	0.51	TRUE	TRUE	TRUE	target	{'investment': 0.51, 'invest': 0.48}
Morphological Modifiers	noun+less_reg	passionless is to passion as remorseless is to	remorse	remorse	0.49	1	1	{'remorse': 0.49, 'regret': 0.05, '______': 0.04, '__': 0.04, '': 0.03}	0	0.488281	0	1	context	context|target	0.51	TRUE	TRUE	TRUE	target	{'remorse': 0.51, 'remorseless': 0.5}
Morphological Modifiers	verb+er_irreg	learner is to learn as listener is to	listen	hear	0.49	0	1	{'hear': 0.49, 'speaker': 0.07, 'listen': 0.07, 'speak': 0.06, 'learn': 0.03}	1	0.065918	0.42041	0.99999	context	context|target	0.51	TRUE	TRUE	TRUE	target	{'listen': 0.51, 'listener': 0.48}
Morphological Modifiers	re+verb_reg	confirm is to reconfirm as create is to	recreate	create	0.49	0	1	{'create': 0.49, 'recreate': 0.19, 're': 0.04, 'creat': 0.01, 'created': 0.01}	1	0.191406	0.296875	0.99999	context	context|target	0.51	TRUE	TRUE	TRUE	target	{'recreate': 0.51, 'create': 0.47}
Verbal & Grammatical Forms	verb_Ving_3pSg	involving is to involves as suggesting is to	suggests	suggests	0.49	1	1	{'suggests': 0.49, 'suggest': 0.11, '': 0.03, '?': 0.02}	0	0.494141	0	1	context	context|target	0.51	TRUE	TRUE	TRUE	target	{'suggests': 0.51, 'suggesting': 0.46}
Verbal & Grammatical Forms	verb_inf_3pSg	consider is to considers as require is to	requires	requires	0.49	1	1	{'requires': 0.49, 'required': 0.21, 'requirements': 0.03, 'require': 0.03, 'requisite': 0.02}	0	0.494141	0	1	context	context|target	0.51	TRUE	TRUE	TRUE	target	{'requires': 0.51, 'require': 0.5}
Verbal & Grammatical Forms	verb_inf_Ved	became is to become as told is to	tell	tell	0.49	1	1	{'tell': 0.49, 'told': 0.14, 'be': 0.09, '______': 0.02, '__': 0.02}	0	0.492188	0	1	context	context|target	0.51	TRUE	TRUE	TRUE	target	{'tell': 0.51, 'told': 0.49}
Verbal & Grammatical Forms	verb_inf_Ving	improving is to improve as requiring is to	require	require	0.49	1	1	{'require': 0.49, 'demand': 0.05, 'be': 0.03, 'need': 0.03, 'request': 0.02}	0	0.492188	0	1	context	context|target	0.51	TRUE	TRUE	TRUE	target	{'require': 0.51, 'requiring': 0.45}
Verbal & Grammatical Forms	verb_Ving_Ved	introducing is to introduced as understanding is to	understood	understood	0.49	1	1	{'understood': 0.49, 'understand': 0.05, '______': 0.04, '': 0.03, '__': 0.03}	0	0.486328	0	1	context	context|target	0.51	TRUE	TRUE	TRUE	target	{'understood': 0.51, 'understanding': 0.5}
Factual Knowledge	country_capital	Vietnam is to Hanoi as Jamaica is to	kingston	Kingston	0.48	1	1	{'Kingston': 0.48, ':': 0.04, '______': 0.03, '__': 0.03, '': 0.03}	0	0.480469	0	1	context	context|target	0.51	TRUE	TRUE	TRUE	target	{'kingston': 0.51, 'jamaica': 0.5}
Factual Knowledge	capital_world	Hanoi is to Vietnam as Kampala is to	uganda	Uganda	0.48	1	1	{'Uganda': 0.48, '______': 0.07, '__': 0.05, 'what': 0.05, '_____': 0.03}	0	0.476562	0	1	context	context|target	0.51	TRUE	TRUE	TRUE	target	{'uganda': 0.51, 'kampala': 0.48}
Factual Knowledge	capital_world	Vietnam is to Hanoi as Jamaica is to	kingston	Kingston	0.48	1	1	{'Kingston': 0.48, ':': 0.04, '______': 0.03, '__': 0.03, '': 0.03}	0	0.480469	0	1	context	context|target	0.51	TRUE	TRUE	TRUE	target	{'kingston': 0.51, 'jamaica': 0.5}
Morphological Modifiers	adj_superlative	dumbest is to dumb as handiest is to	handy	handy	0.48	1	1	{'handy': 0.48, 'hand': 0.28, 'hands': 0.03, 'helpful': 0.02, '______': 0.01}	0	0.482422	0	1	context	context|target	0.51	TRUE	TRUE	TRUE	target	{'handy': 0.51, 'handiest': 0.5}
Morphological Modifiers	verb+ment_irreg	embarrass is to embarrassment as involve is to	involvement	involvement	0.48	1	1	{'involvement': 0.48, '______': 0.05, '': 0.03, '__': 0.02}	0	0.478516	0	1	context	context|target	0.51	TRUE	TRUE	TRUE	target	{'involvement': 0.51, 'involve': 0.49}
Morphological Modifiers	verb+er_irreg	determiner is to determine as receiver is to	receive	receive	0.48	1	1	{'receive': 0.48, 'receiver': 0.04, 'determine': 0.03, 'give': 0.02, '': 0.01}	0	0.482422	0	1	context	context|target	0.51	TRUE	TRUE	TRUE	target	{'receive': 0.51, 'receiver': 0.48}
Verbal & Grammatical Forms	verb_inf_Ving	attend is to attending as believe is to	believing	believing	0.48	1	1	{'believing': 0.48, 'belief': 0.06, '__': 0.04, '': 0.03, '______': 0.03}	0	0.476562	0	1	context	context|target	0.51	TRUE	TRUE	TRUE	target	{'believing': 0.51, 'believe': 0.48}
Verbal & Grammatical Forms	verb_3pSg_Ved	announces is to announced as sends is to	sent	sent	0.48	1	1	{'sent': 0.48, 'send': 0.27, 'sending': 0.05, 'sends': 0.05, '': 0.01}	0	0.482422	0	1	context	context|target	0.51	TRUE	TRUE	TRUE	target	{'sent': 0.51, 'sends': 0.48}
Verbal & Grammatical Forms	verb_Ving_Ved	expected is to expecting as taught is to	teaching	teaching	0.48	1	1	{'teaching': 0.48, 'taught': 0.11, 'teach': 0.05, 'teacher': 0.04, 'learning': 0.03}	0	0.482422	0	1	context	context|target	0.51	TRUE	TRUE	TRUE	target	{'teaching': 0.51, 'taught': 0.48}
Verbal & Grammatical Forms	verb_3pSg_Ved	creates is to created as receives is to	received	received	0.48	1	1	{'received': 0.48, 'receives': 0.09, 'given': 0.03, '______': 0.02, '': 0.02}	0	0.484375	0	1	context	context|target	0.51	TRUE	TRUE	TRUE	target	{'received': 0.51, 'receives': 0.49}
Verbal & Grammatical Forms	verb_Ving_Ved	adding is to added as relating is to	related	related	0.48	1	1	{'related': 0.48, 'relation': 0.06, 'relationship': 0.03, 'relational': 0.02, 'relative': 0.02}	0	0.482422	0	1	context	context|target	0.51	TRUE	TRUE	TRUE	target	{'related': 0.51, 'relating': 0.49}
Verbal & Grammatical Forms	verb_3pSg_Ved	occurs is to occurred as sends is to	sent	sent	0.48	1	1	{'sent': 0.48, '': 0.04, '______': 0.04, 'A': 0.02}	0	0.476562	0	1	context	context|target	0.51	TRUE	TRUE	TRUE	target	{'sent': 0.51, 'sends': 0.48}
Factual Knowledge	country_capital	Beijing is to China as Jakarta is to	indonesia	Indonesia	0.47	1	1	{'Indonesia': 0.47, 'what': 0.07, '______': 0.05, ':': 0.03, '_____': 0.03}	0	0.472656	0	1	context	context|target	0.51	TRUE	TRUE	TRUE	target	{'indonesia': 0.51, 'jakarta': 0.5}
Factual Knowledge	country_capital	Amman is to Jordan as Islamabad is to	pakistan	Pakistan	0.47	1	1	{'Pakistan': 0.47, '______': 0.1, '__': 0.06, '____': 0.04, '___': 0.04}	0	0.472656	0	1	context	context|target	0.51	TRUE	TRUE	TRUE	target	{'pakistan': 0.51, 'islamabad': 0.5}
Factual Knowledge	capital_world	Riga is to Latvia as Algiers is to	algeria	Algeria	0.47	1	1	{'Algeria': 0.47, '______': 0.08, '__': 0.06, 'what': 0.03, '___': 0.03}	0	0.472656	0	1	context	context|target	0.51	TRUE	TRUE	TRUE	target	{'algeria': 0.51, 'algiers': 0.5}
Factual Knowledge	capital_world	Beijing is to China as Jakarta is to	indonesia	Indonesia	0.47	1	1	{'Indonesia': 0.47, 'what': 0.07, '______': 0.05, ':': 0.03, '_____': 0.03}	0	0.472656	0	1	context	context|target	0.51	TRUE	TRUE	TRUE	target	{'indonesia': 0.51, 'jakarta': 0.5}
Morphological Modifiers	verb+able_reg	recognize is to recognizable as sustain is to	sustainable	sustainable	0.47	1	1	{'sustainable': 0.47, '______': 0.05, '__': 0.05, '': 0.04}	0	0.466797	0	1	context	context|target	0.51	TRUE	TRUE	TRUE	target	{'sustainable': 0.51, 'sustain': 0.48}
Morphological Modifiers	adj_comparative	dumber is to dumb as stronger is to	strong	strong	0.47	1	1	{'strong': 0.47, 'smart': 0.1, 'weak': 0.06, 'stronger': 0.06, '______': 0.02}	0	0.466797	0	1	context	context|target	0.51	TRUE	TRUE	TRUE	target	{'strong': 0.51, 'stronger': 0.5}
Morphological Modifiers	verb+ment_irreg	excitement is to excite as investment is to	invest	invest	0.47	1	1	{'invest': 0.47, 'involve': 0.03, 'interest': 0.03, '__': 0.03, '______': 0.02}	0	0.470703	0	1	context	context|target	0.51	TRUE	TRUE	TRUE	target	{'invest': 0.51, 'investment': 0.5}
Verbal & Grammatical Forms	verb_inf_3pSg	represent is to represents as seem is to	seems	seem	0.47	0.5	1	{'seem': 0.47, 'see': 0.14, 'seems': 0.11, 'be': 0.07, 'seen': 0.03}	2	0.112793	0.361816	0.99998	context	context|target	0.51	TRUE	TRUE	TRUE	target	{'seems': 0.51, 'seem': 0.49}
Verbal & Grammatical Forms	noun_plural_irreg	economies is to economy as families is to	family	family	0.47	1	1	{'family': 0.47, '______': 0.07, '__': 0.04, 'economy': 0.03, 'families': 0.02}	0	0.474609	0	1	context	context|target	0.51	TRUE	TRUE	TRUE	target	{'family': 0.51, 'families': 0.48}
Verbal & Grammatical Forms	verb_inf_Ved	agreed is to agree as replaced is to	replace	replace	0.47	1	1	{'replace': 0.47, 'replaced': 0.25, 'be': 0.04, '': 0.02, 'repl': 0.01}	0	0.470703	0	1	context	context|target	0.51	TRUE	TRUE	TRUE	target	{'replace': 0.51, 'replaced': 0.51}
Verbal & Grammatical Forms	verb_3pSg_Ved	happened is to happens as occurred is to	occurs	occur	0.47	0.5	1	{'occur': 0.47, 'occurs': 0.13, 'will': 0.05, '______': 0.02, 'occurring': 0.02}	1	0.133789	0.333008	0.99999	context	context|target	0.51	TRUE	TRUE	TRUE	target	{'occurs': 0.51, 'occurred': 0.5}
Verbal & Grammatical Forms	verb_3pSg_Ved	consists is to consisted as refers is to	referred	referred	0.47	1	1	{'referred': 0.47, 'refer': 0.19, 'referring': 0.09, 'refers': 0.05, 'reference': 0.02}	0	0.474609	0	1	context	context|target	0.51	TRUE	TRUE	TRUE	target	{'referred': 0.51, 'refers': 0.49}
Factual Knowledge	country_capital	Abuja is to Nigeria as Islamabad is to	pakistan	Pakistan	0.46	1	1	{'Pakistan': 0.46, '______': 0.17, '__': 0.07, '_____': 0.03, '____': 0.02}	0	0.457031	0	1	context	context|target	0.51	TRUE	TRUE	TRUE	target	{'pakistan': 0.51, 'islamabad': 0.5}
Morphological Modifiers	adj_superlative	hugest is to huge as riskiest is to	risky	risky	0.46	1	1	{'risky': 0.46, 'risk': 0.11, '______': 0.02, 'safe': 0.02, '': 0.02}	0	0.458984	0	1	context	context|target	0.51	TRUE	TRUE	TRUE	target	{'risky': 0.51, 'riskiest': 0.49}
Morphological Modifiers	adj_comparative	scarier is to scary as tinier is to	tiny	tiny	0.46	1	1	{'tiny': 0.46, '______': 0.05, '_____': 0.03, '____': 0.03, '': 0.02}	0	0.455078	0	1	context	context|target	0.51	TRUE	TRUE	TRUE	target	{'tiny': 0.51, 'tinier': 0.5}
Morphological Modifiers	adj_comparative	dumber is to dumb as happier is to	happy	happy	0.46	1	1	{'happy': 0.46, 'sad': 0.05, '______': 0.04, 'unhappy': 0.03, 'smart': 0.02}	0	0.462891	0	1	context	context|target	0.51	TRUE	TRUE	TRUE	target	{'happy': 0.51, 'happier': 0.49}
Morphological Modifiers	adj_comparative	dumber is to dumb as harsher is to	harsh	harsh	0.46	1	1	{'harsh': 0.46, 'gentle': 0.03, 'hard': 0.02, 'mild': 0.02, 'kind': 0.02}	0	0.457031	0	1	context	context|target	0.51	TRUE	TRUE	TRUE	target	{'harsh': 0.51, 'harsher': 0.5}
Morphological Modifiers	un+adj_reg	unable is to able as unhappy is to	happy	happy	0.46	1	1	{'happy': 0.46, '______': 0.04, '': 0.04, '__': 0.02}	0	0.455078	0	1	context	context|target	0.51	TRUE	TRUE	TRUE	target	{'happy': 0.51, 'unhappy': 0.5}
Morphological Modifiers	verb+er_irreg	advertiser is to advertise as organiser is to	organise	organise	0.46	1	1	{'organise': 0.46, 'organize': 0.06, 'organ': 0.02, '': 0.02, '______': 0.01}	0	0.457031	0	1	context	context|target	0.51	TRUE	TRUE	TRUE	target	{'organise': 0.51, 'organiser': 0.51}
Verbal & Grammatical Forms	verb_inf_3pSg	considers is to consider as prevents is to	prevent	prevent	0.46	1	1	{'prevent': 0.46, 'prevents': 0.08, 'hinder': 0.04, 'consider': 0.02, 'stop': 0.02}	0	0.462891	0	1	context	context|target	0.51	TRUE	TRUE	TRUE	target	{'prevent': 0.51, 'prevents': 0.5}
Verbal & Grammatical Forms	verb_inf_3pSg	accepts is to accept as believes is to	believe	believe	0.46	1	1	{'believe': 0.46, 'accept': 0.06, 'be': 0.03, 'have': 0.02, 'take': 0.01}	0	0.457031	0	1	context	context|target	0.51	TRUE	TRUE	TRUE	target	{'believe': 0.51, 'believes': 0.48}
Verbal & Grammatical Forms	verb_inf_Ved	develop is to developed as follow is to	followed	followed	0.46	1	1	{'followed': 0.46, '?': 0.02, '': 0.03}	0	0.464844	0	1	context	context|target	0.51	TRUE	TRUE	TRUE	target	{'followed': 0.51, 'follow': 0.49}
Verbal & Grammatical Forms	verb_Ving_Ved	agreed is to agreeing as included is to	including	included	0.46	0	1	{'included': 0.46, 'including': 0.08, '______': 0.03, 'excluded': 0.02, '__': 0.02}	1	0.0791016	0.375977	0.99999	context	context|target	0.51	TRUE	TRUE	TRUE	target	{'including': 0.51, 'included': 0.5}
Verbal & Grammatical Forms	verb_3pSg_Ved	requires is to required as seems is to	seemed	seemed	0.46	1	1	{'seemed': 0.46, 'seems': 0.1, 'seeming': 0.06, 'seem': 0.05, '______': 0.04}	0	0.455078	0	1	context	context|target	0.51	TRUE	TRUE	TRUE	target	{'seemed': 0.51, 'seems': 0.5}
Morphological Modifiers	adj_comparative	dumber is to dumb as huger is to	huge	huge	0.45	1	1	{'huge': 0.45, 'hug': 0.2, 'big': 0.06, '______': 0.01, '____': 0.01}	0	0.451172	0	1	context	context|target	0.51	TRUE	TRUE	TRUE	target	{'huge': 0.51, 'huger': 0.48}
Morphological Modifiers	re+verb_reg	publish is to republish as solve is to	resolve	solve	0.45	0	1	{'solve': 0.45, 'resolve': 0.17, 'dissolve': 0.08, 'res': 0.01, 'sol': 0.01}	1	0.166992	0.286133	0.99999	context	context|target	0.51	TRUE	TRUE	TRUE	target	{'resolve': 0.51, 'solve': 0.48}
Verbal & Grammatical Forms	verb_inf_3pSg	continues is to continue as tells is to	tell	tell	0.45	1	1	{'tell': 0.45, 'tells': 0.19, 'told': 0.07, 'continue': 0.02, 't': 0.01}	0	0.445312	0	1	context	context|target	0.51	TRUE	TRUE	TRUE	target	{'tell': 0.51, 'tells': 0.48}
Verbal & Grammatical Forms	noun_plural_irreg	basis is to bases as industry is to	industries	industries	0.45	1	1	{'industries': 0.45, 'economies': 0.1, 'economics': 0.03, 'the': 0.03, 'factories': 0.03}	0	0.447266	0	1	context	context|target	0.51	TRUE	TRUE	TRUE	target	{'industries': 0.51, 'industry': 0.47}
Verbal & Grammatical Forms	verb_inf_Ved	followed is to follow as involved is to	involve	involve	0.45	1	1	{'involve': 0.45, 'involved': 0.03, 'invol': 0.03, 'follow': 0.03, 'involvement': 0.03}	0	0.447266	0	1	context	context|target	0.51	TRUE	TRUE	TRUE	target	{'involve': 0.51, 'involved': 0.5}
Verbal & Grammatical Forms	verb_inf_Ved	expect is to expected as understand is to	understood	understood	0.45	1	1	{'understood': 0.45, 'understanding': 0.14, '______': 0.05, 'expected': 0.03, '__': 0.03}	0	0.445312	0	1	context	context|target	0.51	TRUE	TRUE	TRUE	target	{'understood': 0.51, 'understand': 0.49}
Verbal & Grammatical Forms	verb_inf_Ving	protecting is to protect as reducing is to	reduce	reduce	0.45	1	1	{'reduce': 0.45, 'protect': 0.02, 'save': 0.02, 'increase': 0.02, 'conserve': 0.02}	0	0.451172	0	1	context	context|target	0.51	TRUE	TRUE	TRUE	target	{'reduce': 0.51, 'reducing': 0.49}
Verbal & Grammatical Forms	verb_3pSg_Ved	continues is to continued as happens is to	happened	happens	0.45	0	1	{'happens': 0.45, 'happened': 0.16, 'happen': 0.06, '______': 0.03, '__': 0.02}	1	0.155273	0.293945	0.99999	context	context|target	0.51	TRUE	TRUE	TRUE	target	{'happened': 0.51, 'happens': 0.48}
Factual Knowledge	capital_world	Damascus is to Syria as Minsk is to	belarus	Belarus	0.44	1	1	{'Belarus': 0.44, 'which': 0.09, 'what': 0.08, '______': 0.03, ':': 0.03}	0	0.4375	0	1	context	context|target	0.51	TRUE	TRUE	TRUE	target	{'belarus': 0.51, 'minsk': 0.46}
Factual Knowledge	capital_world	Belmopan is to Belize as Islamabad is to	pakistan	Pakistan	0.44	1	1	{'Pakistan': 0.44, '______': 0.13, '__': 0.07, '_____': 0.03, ':': 0.03}	0	0.443359	0	1	context	context|target	0.51	TRUE	TRUE	TRUE	target	{'pakistan': 0.51, 'islamabad': 0.51}
Morphological Modifiers	adj_comparative	cheaper is to cheap as denser is to	dense	dense	0.44	1	1	{'dense': 0.44, 'dens': 0.07, 'expensive': 0.03, 'more': 0.02, '______': 0.02}	0	0.441406	0	1	context	context|target	0.51	TRUE	TRUE	TRUE	target	{'dense': 0.51, 'denser': 0.5}
Verbal & Grammatical Forms	verb_Ving_3pSg	describing is to describes as following is to	follows	follow	0.44	0.5	1	{'follow': 0.44, 'follows': 0.13, 'following': 0.12, '______': 0.02, '__': 0.02}	1	0.125977	0.31543	0.99999	context	context|target	0.51	TRUE	TRUE	TRUE	target	{'follows': 0.51, 'following': 0.5}
Verbal & Grammatical Forms	verb_inf_Ved	create is to created as tell is to	told	told	0.44	1	1	{'told': 0.44, '______': 0.04, '__': 0.03, '?': 0.03, '': 0.03}	0	0.441406	0	1	context	context|target	0.51	TRUE	TRUE	TRUE	target	{'told': 0.51, 'tell': 0.48}
Verbal & Grammatical Forms	verb_inf_Ving	considering is to consider as reducing is to	reduce	reduce	0.44	1	1	{'reduce': 0.44, 'consider': 0.06, 'be': 0.03, 'think': 0.01, 'make': 0.01}	0	0.443359	0	1	context	context|target	0.51	TRUE	TRUE	TRUE	target	{'reduce': 0.51, 'reducing': 0.48}
Verbal & Grammatical Forms	verb_3pSg_Ved	continued is to continues as described is to	describes	described	0.44	0	1	{'described': 0.44, 'describes': 0.18, 'describe': 0.17, 'descri': 0.03, 'description': 0.02}	1	0.183594	0.257812	0.99999	context	context|target	0.51	TRUE	TRUE	TRUE	target	{'describes': 0.51, 'described': 0.51}
Verbal & Grammatical Forms	verb_3pSg_Ved	introduces is to introduced as receives is to	received	received	0.44	1	1	{'received': 0.44, 'receives': 0.08, 'given': 0.06, 'receive': 0.05, 'receiving': 0.03}	0	0.443359	0	1	context	context|target	0.51	TRUE	TRUE	TRUE	target	{'received': 0.51, 'receives': 0.49}
Morphological Modifiers	adj+ness_reg	seriousness is to serious as situatedness is to	situated	situated	0.43	1	1	{'situated': 0.43, 'situ': 0.12, 'situation': 0.03, 'what': 0.01, '': 0.01}	0	0.427734	0	1	context	context|target	0.51	TRUE	TRUE	TRUE	target	{'situated': 0.51, 'situatedness': 0.47}
Verbal & Grammatical Forms	verb_Ving_3pSg	appearing is to appears as providing is to	provides	provide	0.43	0.5	1	{'provide': 0.43, 'provides': 0.17, 'provided': 0.12, 'providing': 0.04, 'to': 0.02}	1	0.168945	0.262695	0.99999	context	context|target	0.51	TRUE	TRUE	TRUE	target	{'provides': 0.51, 'providing': 0.49}
Verbal & Grammatical Forms	verb_Ving_3pSg	describing is to describes as relating is to	relates	relates	0.43	1	1	{'relates': 0.43, 'relate': 0.12, '______': 0.03, 'relating': 0.03, 'related': 0.03}	0	0.433594	0	1	context	context|target	0.51	TRUE	TRUE	TRUE	target	{'relates': 0.51, 'relating': 0.5}
Verbal & Grammatical Forms	verb_inf_3pSg	avoid is to avoids as contain is to	contains	contains	0.43	1	1	{'contains': 0.43, '__': 0.05, '': 0.03, '______': 0.05}	0	0.429688	0	1	context	context|target	0.51	TRUE	TRUE	TRUE	target	{'contains': 0.51, 'contain': 0.49}
Verbal & Grammatical Forms	noun_plural_irreg	duty is to duties as library is to	libraries	books	0.43	0	1	{'books': 0.43, 'libraries': 0.14, 'library': 0.05, 'libr': 0.02, 'book': 0.02}	1	0.137695	0.288086	0.99999	context	context|target	0.51	TRUE	TRUE	TRUE	target	{'libraries': 0.51, 'library': 0.47}
Verbal & Grammatical Forms	verb_inf_Ved	believe is to believed as decide is to	decided	decided	0.43	1	1	{'decided': 0.43, 'decision': 0.15, 'decide': 0.12, '__': 0.01, '______': 0.01}	0	0.431641	0	1	context	context|target	0.51	TRUE	TRUE	TRUE	target	{'decided': 0.51, 'decide': 0.5}
Verbal & Grammatical Forms	verb_inf_Ving	expect is to expecting as require is to	requiring	requiring	0.43	1	1	{'requiring': 0.43, 'required': 0.05, 'require': 0.03, '__': 0.03, '______': 0.02}	0	0.427734	0	1	context	context|target	0.51	TRUE	TRUE	TRUE	target	{'requiring': 0.51, 'require': 0.5}
Verbal & Grammatical Forms	verb_inf_Ving	encouraging is to encourage as including is to	include	include	0.43	1	1	{'include': 0.43, 'discourage': 0.09, 'encourage': 0.05, 'be': 0.04, 'exclude': 0.04}	0	0.433594	0	1	context	context|target	0.51	TRUE	TRUE	TRUE	target	{'include': 0.51, 'including': 0.48}
Verbal & Grammatical Forms	verb_Ving_Ved	relating is to related as representing is to	represented	represented	0.43	1	1	{'represented': 0.43, '______': 0.05, 'representative': 0.03, '__': 0.03, 'represent': 0.03}	0	0.427734	0	1	context	context|target	0.51	TRUE	TRUE	TRUE	target	{'represented': 0.51, 'representing': 0.49}
Verbal & Grammatical Forms	verb_Ving_Ved	managed is to managing as reduced is to	reducing	reducing	0.43	1	1	{'reducing': 0.43, 'reduced': 0.05, '______': 0.04, 'increasing': 0.04, '__': 0.02}	0	0.427734	0	1	context	context|target	0.51	TRUE	TRUE	TRUE	target	{'reducing': 0.51, 'reduced': 0.5}
Verbal & Grammatical Forms	verb_3pSg_Ved	continues is to continued as sends is to	sent	sent	0.43	1	1	{'sent': 0.43, 'sends': 0.12, '______': 0.03, 'send': 0.03, '__': 0.02}	0	0.433594	0	1	context	context|target	0.51	TRUE	TRUE	TRUE	target	{'sent': 0.51, 'sends': 0.49}
Verbal & Grammatical Forms	verb_3pSg_Ved	expects is to expected as involves is to	involved	involved	0.43	1	1	{'involved': 0.43, 'involves': 0.1, '______': 0.03, 'involve': 0.02, 'involving': 0.02}	0	0.427734	0	1	context	context|target	0.51	TRUE	TRUE	TRUE	target	{'involved': 0.51, 'involves': 0.48}
Factual Knowledge	country_capital	Switzerland is to Bern as Taiwan is to	taipei	Taipei	0.42	1	1	{'Taipei': 0.42, '______': 0.09, '__': 0.08, '____': 0.05, '___': 0.04}	0	0.419922	0	1	context	context|target	0.51	TRUE	TRUE	TRUE	target	{'taipei': 0.51, 'taiwan': 0.49}
Factual Knowledge	capital_world	Oslo is to Norway as Tirana is to	albania	Albania	0.42	1	1	{'Albania': 0.42, 'what': 0.06, '______': 0.06, '__': 0.06, '?': 0.03}	0	0.417969	0	1	context	context|target	0.51	TRUE	TRUE	TRUE	target	{'albania': 0.51, 'tirana': 0.5}
Factual Knowledge	capital_world	Tehran is to Iran as Islamabad is to	pakistan	Pakistan	0.42	1	1	{'Pakistan': 0.42, '______': 0.11, '__': 0.05, 'what': 0.04, '____': 0.03}	0	0.423828	0	1	context	context|target	0.51	TRUE	TRUE	TRUE	target	{'pakistan': 0.51, 'islamabad': 0.5}
Morphological Modifiers	superlative	strongest is to strong as luckiest is to	lucky	lucky	0.42	1	1	{'lucky': 0.42, 'luck': 0.16, '______': 0.03, 'unlucky': 0.02, '': 0.02}	0	0.417969	0	1	context	context|target	0.51	TRUE	TRUE	TRUE	target	{'lucky': 0.51, 'luckiest': 0.49}
Morphological Modifiers	verb+able_reg	achieveable is to achieve as replaceable is to	replace	replace	0.42	1	1	{'replace': 0.42, 'be': 0.15, 'replaced': 0.06, 'ir': 0.02, 'repl': 0.01}	0	0.423828	0	1	context	context|target	0.51	TRUE	TRUE	TRUE	target	{'replace': 0.51, 'replaceable': 0.5}
Morphological Modifiers	adj+ly_reg	historical is to historically as nice is to	nicely	nicely	0.42	1	1	{'nicely': 0.42, 'nic': 0.17, 'nice': 0.05, 'kindly': 0.02, '?': 0.02}	0	0.423828	0	1	context	context|target	0.51	TRUE	TRUE	TRUE	target	{'nicely': 0.51, 'nice': 0.5}
Verbal & Grammatical Forms	verb_inf_Ving	achieve is to achieving as believe is to	believing	believing	0.42	1	1	{'believing': 0.42, 'believe': 0.07, 'belief': 0.05, '______': 0.04, '': 0.03}	0	0.423828	0	1	context	context|target	0.51	TRUE	TRUE	TRUE	target	{'believing': 0.51, 'believe': 0.49}
Verbal & Grammatical Forms	verb_inf_Ving	applying is to apply as maintaining is to	maintain	maintain	0.42	1	1	{'maintain': 0.42, 'keep': 0.06, 'continue': 0.05, 'preserve': 0.03, 'be': 0.02}	0	0.416016	0	1	context	context|target	0.51	TRUE	TRUE	TRUE	target	{'maintain': 0.51, 'maintaining': 0.49}
Verbal & Grammatical Forms	verb_inf_Ved	expect is to expected as provide is to	provided	provided	0.42	1	1	{'provided': 0.42, '______': 0.04, '': 0.02, '?': 0.02, 'required': 0.02}	0	0.417969	0	1	context	context|target	0.51	TRUE	TRUE	TRUE	target	{'provided': 0.51, 'provide': 0.5}
Verbal & Grammatical Forms	verb_inf_Ving	consider is to considering as teach is to	teaching	teaching	0.42	1	1	{'teaching': 0.42, 'teacher': 0.08, 'learning': 0.06, 'taught': 0.05, 'teach': 0.04}	0	0.419922	0	1	context	context|target	0.51	TRUE	TRUE	TRUE	target	{'teaching': 0.51, 'teach': 0.48}
Verbal & Grammatical Forms	verb_inf_Ving	receiving is to receive as spending is to	spend	spend	0.42	1	1	{'spend': 0.42, 'give': 0.15, 'pay': 0.05, 'expend': 0.05, 'consume': 0.03}	0	0.416016	0	1	context	context|target	0.51	TRUE	TRUE	TRUE	target	{'spend': 0.51, 'spending': 0.5}
Factual Knowledge	country_capital	Greece is to Athens as Ireland is to	dublin	Dublin	0.41	1	1	{'Dublin': 0.41, '______': 0.13, '__': 0.04, '_____': 0.03, 'Cork': 0.03}	0	0.408203	0	1	context	context|target	0.51	TRUE	TRUE	TRUE	target	{'dublin': 0.51, 'ireland': 0.49}
Factual Knowledge	capital_world	Greece is to Athens as Ireland is to	dublin	Dublin	0.41	1	1	{'Dublin': 0.41, '______': 0.13, '__': 0.04, '_____': 0.03, 'Cork': 0.03}	0	0.408203	0	1	context	context|target	0.51	TRUE	TRUE	TRUE	target	{'dublin': 0.51, 'ireland': 0.49}
Factual Knowledge	capital_world	Russia is to Moscow as Pakistan is to	islamabad	Islamabad	0.41	1	1	{'Islamabad': 0.41, 'Lahore': 0.09, 'Karachi': 0.09, '______': 0.09, '__': 0.04}	0	0.40625	0	1	context	context|target	0.51	TRUE	TRUE	TRUE	target	{'islamabad': 0.51, 'pakistan': 0.5}
Morphological Modifiers	adj_superlative	strictest is to strict as strongest is to	strong	strong	0.41	1	1	{'strong': 0.41, '': 0.03, 'strongest': 0.04, ':': 0.03}	0	0.40625	0	1	context	context|target	0.51	TRUE	TRUE	TRUE	target	{'strong': 0.51, 'strongest': 0.49}
Morphological Modifiers	adj_superlative	lengthiest is to lengthy as mildest is to	mild	mild	0.41	1	1	{'mild': 0.41, 'mil': 0.21, '______': 0.03, 'milk': 0.02, 'm': 0.02}	0	0.414062	0	1	context	context|target	0.51	TRUE	TRUE	TRUE	target	{'mild': 0.51, 'mildest': 0.48}
Morphological Modifiers	verb+able_reg	deliverable is to deliver as replaceable is to	replace	replace	0.41	1	1	{'replace': 0.41, 'be': 0.08, 'repair': 0.03, '': 0.01}	0	0.408203	0	1	context	context|target	0.51	TRUE	TRUE	TRUE	target	{'replace': 0.51, 'replaceable': 0.5}
Morphological Modifiers	verb+ment_irreg	acknowledgement is to acknowledge as enjoyment is to	enjoy	enjoy	0.41	1	1	{'enjoy': 0.41, 'be': 0.06, '': 0.03, 'acknowledge': 0.02, 'use': 0.01}	0	0.410156	0	1	context	context|target	0.51	TRUE	TRUE	TRUE	target	{'enjoy': 0.51, 'enjoyment': 0.49}
Morphological Modifiers	adj_comparative	dumber is to dumb as vaguer is to	vague	vague	0.41	1	1	{'vague': 0.41, '______': 0.03, 'clear': 0.03, '"': 0.02, 'what': 0.02}	0	0.414062	0	1	context	context|target	0.51	TRUE	TRUE	TRUE	target	{'vague': 0.51, 'vaguer': 0.5}
Verbal & Grammatical Forms	verb_Ving_3pSg	refers is to referring as relates is to	relating	relating	0.41	1	1	{'relating': 0.41, 'relation': 0.21, 'relationship': 0.09, 'relations': 0.05, 'related': 0.04}	0	0.408203	0	1	context	context|target	0.51	TRUE	TRUE	TRUE	target	{'relating': 0.51, 'relates': 0.5}
Verbal & Grammatical Forms	verb_inf_Ving	believe is to believing as include is to	including	including	0.41	1	1	{'including': 0.41, 'inclusion': 0.06, 'includes': 0.05, 'included': 0.05, 'excluding': 0.04}	0	0.412109	0	1	context	context|target	0.51	TRUE	TRUE	TRUE	target	{'including': 0.51, 'include': 0.49}
Verbal & Grammatical Forms	verb_inf_3pSg	continues is to continue as provides is to	provide	provide	0.41	1	1	{'provide': 0.41, 'provides': 0.18, 'provided': 0.12, 'be': 0.01, '': 0.01}	0	0.40625	0	1	context	context|target	0.51	TRUE	TRUE	TRUE	target	{'provide': 0.51, 'provides': 0.5}
Verbal & Grammatical Forms	verb_inf_3pSg	enjoys is to enjoy as reduces is to	reduce	reduce	0.41	1	1	{'reduce': 0.41, 'enjoy': 0.12, 'increase': 0.02, 'be': 0.02, 'make': 0.01}	0	0.410156	0	1	context	context|target	0.51	TRUE	TRUE	TRUE	target	{'reduce': 0.51, 'reduces': 0.5}
Verbal & Grammatical Forms	verb_inf_Ved	developed is to develop as replaced is to	replace	replace	0.41	1	1	{'replace': 0.41, 'repair': 0.06, 'be': 0.03, 'replaced': 0.03, '______': 0.02}	0	0.40625	0	1	context	context|target	0.51	TRUE	TRUE	TRUE	target	{'replace': 0.51, 'replaced': 0.5}
Verbal & Grammatical Forms	verb_3pSg_Ved	refers is to referred as spends is to	spent	spent	0.41	1	1	{'spent': 0.41, 'spends': 0.03, 'earned': 0.03, '______': 0.03, 'spend': 0.03}	0	0.408203	0	1	context	context|target	0.51	TRUE	TRUE	TRUE	target	{'spent': 0.51, 'spends': 0.48}
Verbal & Grammatical Forms	verb_Ving_Ved	allowing is to allowed as managing is to	managed	managed	0.41	1	1	{'managed': 0.41, 'manager': 0.12, 'allowed': 0.05, 'management': 0.05, 'manage': 0.02}	0	0.410156	0	1	context	context|target	0.51	TRUE	TRUE	TRUE	target	{'managed': 0.51, 'managing': 0.49}
Verbal & Grammatical Forms	verb_Ving_Ved	allowing is to allowed as appointing is to	appointed	appointed	0.41	1	1	{'appointed': 0.41, 'appoint': 0.18, 'appointment': 0.05, 'elected': 0.03, 'allowed': 0.02}	0	0.40625	0	1	context	context|target	0.51	TRUE	TRUE	TRUE	target	{'appointed': 0.51, 'appointing': 0.46}
Factual Knowledge	country_capital	Athens is to Greece as Bucharest is to	romania	Romania	0.4	1	1	{'Romania': 0.4, 'what': 0.1, '______': 0.05, 'which': 0.04, ':': 0.04}	0	0.404297	0	1	context	context|target	0.51	TRUE	TRUE	TRUE	target	{'romania': 0.51, 'bucharest': 0.49}
Factual Knowledge	capital_world	Athens is to Greece as Bucharest is to	romania	Romania	0.4	1	1	{'Romania': 0.4, 'what': 0.1, '______': 0.05, 'which': 0.04, ':': 0.04}	0	0.404297	0	1	context	context|target	0.51	TRUE	TRUE	TRUE	target	{'romania': 0.51, 'bucharest': 0.49}
Morphological Modifiers	adj+ly_reg	historical is to historically as internal is to	internally	internal	0.4	0.5	1	{'internal': 0.4, 'external': 0.04, 'intern': 0.03, 'internally': 0.03, '______': 0.03}	4	0.0257568	0.37854	0.99996	context	context|target	0.51	TRUE	TRUE	TRUE	target	{'internally': 0.51, 'internal': 0.48}
Morphological Modifiers	re+verb_reg	adjust is to readjust as distribute is to	redistribute	distribute	0.4	0	1	{'distribute': 0.4, 'redistribute': 0.16, 'mis': 0.03, 'real': 0.02, 'red': 0.02}	1	0.155273	0.241211	0.99999	context	context|target	0.51	TRUE	TRUE	TRUE	target	{'redistribute': 0.51, 'distribute': 0.47}
Semantic Relations	antonyms_gradable	extravert is to introvert as loose is to	tight	tight	0.4	1	1	{'tight': 0.4, 'rigid': 0.06, '______': 0.06, 'strict': 0.06, '__': 0.04}	0	0.398438	0	1	context	context|target	0.51	TRUE	TRUE	TRUE	target	{'tight': 0.51, 'loose': 0.5}
Verbal & Grammatical Forms	verb_inf_3pSg	require is to requires as suggest is to	suggests	suggests	0.4	1	1	{'suggests': 0.4, 'suggest': 0.2, 'recommends': 0.08, 'recommend': 0.04, 'suggested': 0.02}	0	0.396484	0	1	context	context|target	0.51	TRUE	TRUE	TRUE	target	{'suggests': 0.51, 'suggest': 0.49}
Verbal & Grammatical Forms	noun_plural_irreg	duties is to duty as policies is to	policy	policy	0.4	1	1	{'policy': 0.4, 'policies': 0.29, 'politics': 0.08, 'pol': 0.01, '': 0.01}	0	0.396484	0	1	context	context|target	0.51	TRUE	TRUE	TRUE	target	{'policy': 0.51, 'policies': 0.48}
Verbal & Grammatical Forms	verb_inf_Ved	enjoyed is to enjoy as replaced is to	replace	replace	0.4	1	1	{'replace': 0.4, 'be': 0.09, 'replaced': 0.08, 'enjoy': 0.05, 'enjoyed': 0.03}	0	0.400391	0	1	context	context|target	0.51	TRUE	TRUE	TRUE	target	{'replace': 0.51, 'replaced': 0.51}
Verbal & Grammatical Forms	verb_inf_Ved	performed is to perform as reduced is to	reduce	reduce	0.4	1	1	{'reduce': 0.4, 'be': 0.12, 'reduced': 0.07, 'perform': 0.03, 'become': 0.02}	0	0.398438	0	1	context	context|target	0.51	TRUE	TRUE	TRUE	target	{'reduce': 0.51, 'reduced': 0.51}
Verbal & Grammatical Forms	verb_Ving_Ved	related is to relating as replaced is to	replacing	replacing	0.4	1	1	{'replacing': 0.4, 'replaced': 0.12, 'replace': 0.09, '______': 0.03, 'replacement': 0.03}	0	0.404297	0	1	context	context|target	0.51	TRUE	TRUE	TRUE	target	{'replacing': 0.51, 'replaced': 0.49}
Verbal & Grammatical Forms	verb_Ving_Ved	published is to publishing as taught is to	teaching	teaching	0.4	1	1	{'teaching': 0.4, 'learning': 0.2, 'education': 0.07, '': 0.04, 'learned': 0.02}	0	0.402344	0	1	context	context|target	0.51	TRUE	TRUE	TRUE	target	{'teaching': 0.51, 'taught': 0.47}
Verbal & Grammatical Forms	verb_3pSg_Ved	considers is to considered as replaces is to	replaced	replaced	0.4	1	1	{'replaced': 0.4, 'considered': 0.07, 'replaces': 0.07, 'replace': 0.05, 'replacing': 0.03}	0	0.404297	0	1	context	context|target	0.51	TRUE	TRUE	TRUE	target	{'replaced': 0.51, 'replaces': 0.49}
Factual Knowledge	country_capital	Egypt is to Cairo as England is to	london	London	0.39	1	1	{'London': 0.39, '______': 0.08, '__': 0.04, ':': 0.03, 'what': 0.03}	0	0.392578	0	1	context	context|target	0.51	TRUE	TRUE	TRUE	target	{'london': 0.51, 'england': 0.49}
Factual Knowledge	capital_world	Egypt is to Cairo as England is to	london	London	0.39	1	1	{'London': 0.39, '______': 0.08, '__': 0.04, ':': 0.03, 'what': 0.03}	0	0.392578	0	1	context	context|target	0.51	TRUE	TRUE	TRUE	target	{'london': 0.51, 'england': 0.49}
Morphological Modifiers	verb+able_reg	executable is to execute as learnable is to	learn	learn	0.39	1	1	{'learn': 0.39, 'execute': 0.06, 'be': 0.05, 'teach': 0.02, 'become': 0.02}	0	0.390625	0	1	context	context|target	0.51	TRUE	TRUE	TRUE	target	{'learn': 0.51, 'learnable': 0.48}
Morphological Modifiers	verb+er_irreg	borrower is to borrow as loser is to	lose	lose	0.39	1	1	{'lose': 0.39, 'loser': 0.11, 'win': 0.11, 'loss': 0.05, 'gain': 0.03}	0	0.388672	0	1	context	context|target	0.51	TRUE	TRUE	TRUE	target	{'lose': 0.51, 'loser': 0.51}
Morphological Modifiers	verb+er_irreg	achiever is to achieve as announcer is to	announce	announce	0.39	1	1	{'announce': 0.39, '__': 0.03, '______': 0.03, 'what': 0.02, 'broadcast': 0.02}	0	0.390625	0	1	context	context|target	0.51	TRUE	TRUE	TRUE	target	{'announce': 0.51, 'announcer': 0.49}
Verbal & Grammatical Forms	verb_inf_Ving	consider is to considering as reduce is to	reducing	reducing	0.39	1	1	{'reducing': 0.39, 'reduced': 0.11, 'reduction': 0.08, 'reduces': 0.03, 'increasing': 0.03}	0	0.392578	0	1	context	context|target	0.51	TRUE	TRUE	TRUE	target	{'reducing': 0.51, 'reduce': 0.48}
Verbal & Grammatical Forms	verb_inf_Ved	apply is to applied as include is to	included	included	0.39	1	1	{'included': 0.39, '__': 0.03, '______': 0.02, '?': 0.02}	0	0.394531	0	1	context	context|target	0.51	TRUE	TRUE	TRUE	target	{'included': 0.51, 'include': 0.48}
Verbal & Grammatical Forms	verb_Ving_Ved	applying is to applied as reducing is to	reduced	reduced	0.39	1	1	{'reduced': 0.39, '______': 0.06, '____': 0.03, '__': 0.03, '_____': 0.03}	0	0.394531	0	1	context	context|target	0.51	TRUE	TRUE	TRUE	target	{'reduced': 0.51, 'reducing': 0.5}
Factual Knowledge	country_capital	Greece is to Athens as Poland is to	warsaw	Warsaw	0.38	1	1	{'Warsaw': 0.38, '______': 0.09, '_____': 0.04, 'Krak': 0.04, 'G': 0.03}	0	0.384766	0	1	context	context|target	0.51	TRUE	TRUE	TRUE	target	{'warsaw': 0.51, 'poland': 0.5}
Morphological Modifiers	verb+ment_irreg	develop is to development as invest is to	investment	investment	0.38	1	1	{'investment': 0.38, '______': 0.07, '__': 0.04, '': 0.02, 'investor': 0.02}	0	0.382812	0	1	context	context|target	0.51	TRUE	TRUE	TRUE	target	{'investment': 0.51, 'invest': 0.5}
Morphological Modifiers	verb+ment_irreg	engage is to engagement as entitle is to	entitlement	entitlement	0.38	1	1	{'entitlement': 0.38, '______': 0.08, '__': 0.06, 'title': 0.03, 'ent': 0.02}	0	0.378906	0	1	context	context|target	0.51	TRUE	TRUE	TRUE	target	{'entitlement': 0.51, 'entitle': 0.48}
Morphological Modifiers	un+adj_reg	unable is to able as unsuccessful is to	successful	successful	0.38	1	1	{'successful': 0.38, ':': 0.03, 'success': 0.04, '?': 0.03}	0	0.375	0	1	context	context|target	0.51	TRUE	TRUE	TRUE	target	{'successful': 0.51, 'unsuccessful': 0.49}
Morphological Modifiers	un+adj_reg	undesirable is to desirable as unwanted is to	wanted	wanted	0.38	1	1	{'wanted': 0.38, '__': 0.09, '______': 0.08, '____': 0.07, 'desired': 0.06}	0	0.380859	0	1	context	context|target	0.51	TRUE	TRUE	TRUE	target	{'wanted': 0.51, 'unwanted': 0.46}
Morphological Modifiers	adj+ness_reg	markedness is to marked as obviousness is to	obvious	obvious	0.38	1	1	{'obvious': 0.38, 'non': 0.08, 'not': 0.07, 'obs': 0.04, 'conspicuous': 0.03}	0	0.384766	0	1	context	context|target	0.51	TRUE	TRUE	TRUE	target	{'obvious': 0.51, 'obviousness': 0.5}
Verbal & Grammatical Forms	verb_inf_3pSg	achieves is to achieve as continues is to	continue	continue	0.38	1	1	{'continue': 0.38, 'be': 0.05, 'continues': 0.02, 'go': 0.02, 'do': 0.01}	0	0.380859	0	1	context	context|target	0.51	TRUE	TRUE	TRUE	target	{'continue': 0.51, 'continues': 0.5}
Verbal & Grammatical Forms	verb_inf_Ving	expect is to expecting as prevent is to	preventing	preventing	0.38	1	1	{'preventing': 0.38, '______': 0.1, 'permitting': 0.03, '__': 0.03, 'prevention': 0.03}	0	0.382812	0	1	context	context|target	0.51	TRUE	TRUE	TRUE	target	{'preventing': 0.51, 'prevent': 0.48}
Verbal & Grammatical Forms	verb_inf_Ving	considering is to consider as teaching is to	teach	teach	0.38	1	1	{'teach': 0.38, 'learn': 0.08, 'consider': 0.07, 'be': 0.03, 'instruct': 0.02}	0	0.378906	0	1	context	context|target	0.51	TRUE	TRUE	TRUE	target	{'teach': 0.51, 'teaching': 0.47}
Verbal & Grammatical Forms	verb_inf_Ving	maintaining is to maintain as promoting is to	promote	promote	0.38	1	1	{'promote': 0.38, 'encourage': 0.04, '______': 0.03, 'enhance': 0.03, 'maintain': 0.02}	0	0.382812	0	1	context	context|target	0.51	TRUE	TRUE	TRUE	target	{'promote': 0.51, 'promoting': 0.48}
Verbal & Grammatical Forms	verb_3pSg_Ved	expects is to expected as relates is to	related	related	0.38	1	1	{'related': 0.38, '______': 0.06, 'relates': 0.03, 'relative': 0.03, '': 0.02}	0	0.375	0	1	context	context|target	0.51	TRUE	TRUE	TRUE	target	{'related': 0.51, 'relates': 0.49}
Verbal & Grammatical Forms	verb_3pSg_Ved	became is to becomes as suggested is to	suggests	suggested	0.38	0	1	{'suggested': 0.38, 'suggests': 0.14, 'suggest': 0.12, 'suggesting': 0.08, 'suggestions': 0.06}	1	0.139648	0.241211	0.99999	context	context|target	0.51	TRUE	TRUE	TRUE	target	{'suggests': 0.51, 'suggested': 0.5}
Verbal & Grammatical Forms	verb_3pSg_Ved	referred is to refers as spent is to	spends	spends	0.38	1	1	{'spends': 0.38, 'spent': 0.16, 'spend': 0.1, 'spending': 0.05, 'expense': 0.03}	0	0.382812	0	1	context	context|target	0.51	TRUE	TRUE	TRUE	target	{'spends': 0.51, 'spent': 0.48}
Verbal & Grammatical Forms	verb_3pSg_Ved	remained is to remains as replaced is to	replaces	replaced	0.38	0	1	{'replaced': 0.38, 'replaces': 0.25, 'repl': 0.06, 'replace': 0.02, 'replacing': 0.02}	1	0.248047	0.136719	0.99999	context	context|target	0.51	TRUE	TRUE	TRUE	target	{'replaces': 0.51, 'replaced': 0.49}
Morphological Modifiers	verb+ment_irreg	achievement is to achieve as enhancement is to	enhance	enhance	0.37	1	1	{'enhance': 0.37, 'achieve': 0.04, 'improve': 0.03, 'augment': 0.02, 'modify': 0.02}	0	0.365234	0	1	context	context|target	0.51	TRUE	TRUE	TRUE	target	{'enhance': 0.51, 'enhancement': 0.5}
Morphological Modifiers	adj+ly_reg	rare is to rarely as virtual is to	virtually	virtually	0.37	1	1	{'virtually': 0.37, '______': 0.08, 'virtual': 0.06, '__': 0.03, '____': 0.03}	0	0.365234	0	1	context	context|target	0.51	TRUE	TRUE	TRUE	target	{'virtually': 0.51, 'virtual': 0.51}
Semantic Relations	antonyms_gradable	sane is to crazy as sweet is to	sour	sour	0.37	1	1	{'sour': 0.37, 'bitter': 0.13, 'salty': 0.1, '______': 0.03, '__': 0.02}	0	0.365234	0	1	context	context|target	0.51	TRUE	TRUE	TRUE	target	{'sour': 0.51, 'sweet': 0.49}
Verbal & Grammatical Forms	verb_Ving_3pSg	manages is to managing as refers is to	referring	referring	0.37	1	1	{'referring': 0.37, 'refers': 0.07, 'refer': 0.06, 'referencing': 0.03, 'reference': 0.03}	0	0.365234	0	1	context	context|target	0.51	TRUE	TRUE	TRUE	target	{'referring': 0.51, 'refers': 0.47}
Verbal & Grammatical Forms	verb_Ving_3pSg	considering is to considers as understanding is to	understands	understands	0.37	1	1	{'understands': 0.37, 'understand': 0.15, 'understood': 0.09, 'understanding': 0.09, 'considers': 0.02}	0	0.367188	0	1	context	context|target	0.51	TRUE	TRUE	TRUE	target	{'understands': 0.51, 'understanding': 0.49}
Verbal & Grammatical Forms	verb_Ving_3pSg	exists is to existing as explains is to	explaining	explaining	0.37	1	1	{'explaining': 0.37, 'understanding': 0.14, 'explanation': 0.09, 'explains': 0.05, 'explained': 0.04}	0	0.373047	0	1	context	context|target	0.51	TRUE	TRUE	TRUE	target	{'explaining': 0.51, 'explains': 0.48}
Verbal & Grammatical Forms	verb_inf_3pSg	agrees is to agree as provides is to	provide	provides	0.37	0	1	{'provides': 0.37, 'provide': 0.09, 'provided': 0.09, 'providing': 0.02, 'to': 0.02}	1	0.0932617	0.275879	0.99999	context	context|target	0.51	TRUE	TRUE	TRUE	target	{'provide': 0.51, 'provides': 0.5}
Verbal & Grammatical Forms	verb_inf_3pSg	accepts is to accept as contains is to	contain	contain	0.37	1	1	{'contain': 0.37, 'have': 0.08, 'include': 0.04, 'be': 0.04, 'hold': 0.04}	0	0.371094	0	1	context	context|target	0.51	TRUE	TRUE	TRUE	target	{'contain': 0.51, 'contains': 0.49}
Verbal & Grammatical Forms	verb_inf_Ving	following is to follow as receiving is to	receive	give	0.37	0	1	{'give': 0.37, 'be': 0.05, 'follow': 0.04, 'giving': 0.04, 'receive': 0.04}	3	0.0368652	0.334229	0.99997	context	context|target	0.51	TRUE	TRUE	TRUE	target	{'receive': 0.51, 'receiving': 0.49}
Verbal & Grammatical Forms	verb_inf_Ving	improving is to improve as teaching is to	teach	teach	0.37	1	1	{'teach': 0.37, 'learn': 0.12, 'educate': 0.08, 'improve': 0.06, 'instruct': 0.03}	0	0.369141	0	1	context	context|target	0.51	TRUE	TRUE	TRUE	target	{'teach': 0.51, 'teaching': 0.47}
Verbal & Grammatical Forms	verb_3pSg_Ved	expected is to expects as received is to	receives	received	0.37	0	1	{'received': 0.37, 'receives': 0.14, 'receive': 0.11, 'receipt': 0.04, 'receipts': 0.03}	1	0.135742	0.233398	0.99999	context	context|target	0.51	TRUE	TRUE	TRUE	target	{'receives': 0.51, 'received': 0.49}
Verbal & Grammatical Forms	verb_Ving_Ved	adding is to added as receiving is to	received	received	0.37	1	1	{'received': 0.37, 'receiver': 0.05, 'taken': 0.03, 'receive': 0.02, 'the': 0.02}	0	0.367188	0	1	context	context|target	0.51	TRUE	TRUE	TRUE	target	{'received': 0.51, 'receiving': 0.49}
Verbal & Grammatical Forms	verb_Ving_Ved	allowing is to allowed as deciding is to	decided	decided	0.37	1	1	{'decided': 0.37, 'decide': 0.08, 'allowed': 0.06, 'decision': 0.05, 'forbidden': 0.03}	0	0.367188	0	1	context	context|target	0.51	TRUE	TRUE	TRUE	target	{'decided': 0.51, 'deciding': 0.51}
Morphological Modifiers	adj_superlative	purest is to pure as rarest is to	rare	rare	0.36	1	1	{'rare': 0.36, '______': 0.04, '': 0.04, '_____': 0.02, ':': 0.02}	0	0.355469	0	1	context	context|target	0.51	TRUE	TRUE	TRUE	target	{'rare': 0.51, 'rarest': 0.48}
Morphological Modifiers	adj_superlative	hottest is to hot as hungriest is to	hungry	hungry	0.36	1	1	{'hungry': 0.36, '______': 0.07, '"': 0.06, '_____': 0.04, '____': 0.02}	0	0.355469	0	1	context	context|target	0.51	TRUE	TRUE	TRUE	target	{'hungry': 0.51, 'hungriest': 0.5}
Morphological Modifiers	verb+able_reg	replace is to replaceable as understand is to	understandable	understandable	0.36	1	1	{'understandable': 0.36, 'understanding': 0.08, '?': 0.04, '': 0.04, 'compreh': 0.03}	0	0.359375	0	1	context	context|target	0.51	TRUE	TRUE	TRUE	target	{'understandable': 0.51, 'understand': 0.48}
Morphological Modifiers	verb+ment_irreg	achievement is to achieve as agreement is to	agree	agree	0.36	1	1	{'agree': 0.36, 'argue': 0.08, 'achieve': 0.06, 'disagree': 0.04, 'arrive': 0.03}	0	0.363281	0	1	context	context|target	0.51	TRUE	TRUE	TRUE	target	{'agree': 0.51, 'agreement': 0.49}
Morphological Modifiers	adj_comparative	cheaper is to cheap as luckier is to	lucky	luck	0.36	0.5	1	{'luck': 0.36, 'lucky': 0.18, '______': 0.04, '__': 0.02, '_': 0.01}	1	0.178711	0.176758	0.99999	context	context|target	0.51	TRUE	TRUE	TRUE	target	{'lucky': 0.51, 'luckier': 0.5}
Morphological Modifiers	adj_comparative	happier is to happy as stricter is to	strict	strict	0.36	1	1	{'strict': 0.36, 'stricter': 0.06, '______': 0.05, '____': 0.03, 'A': 0.02}	0	0.357422	0	1	context	context|key	0.51	FALSE	TRUE	TRUE	key	{'stricter': 0.51, 'strict': 0.51}
Morphological Modifiers	verb+ment_irreg	entertainment is to entertain as fulfilment is to	fulfil	fulfil	0.36	1	1	{'fulfil': 0.36, 'fulfill': 0.17, 'satisfy': 0.07, 'be': 0.07, 'fill': 0.02}	0	0.355469	0	1	context	context|target	0.51	TRUE	TRUE	TRUE	target	{'fulfil': 0.51, 'fulfilment': 0.48}
Morphological Modifiers	un+adj_reg	unacceptable is to acceptable as unconscious is to	conscious	conscious	0.36	1	1	{'conscious': 0.36, '______': 0.06, 'awake': 0.04, '____': 0.04, 'aware': 0.04}	0	0.359375	0	1	context	context|target	0.51	TRUE	TRUE	TRUE	target	{'conscious': 0.51, 'unconscious': 0.47}
Morphological Modifiers	re+verb_reg	assign is to reassign as connect is to	reconnect	connect	0.36	0	1	{'connect': 0.36, 'reconnect': 0.13, 'disconnect': 0.07, 'join': 0.02, 'link': 0.02}	1	0.125977	0.237305	0.99999	context	context|target	0.51	TRUE	TRUE	TRUE	target	{'reconnect': 0.51, 'connect': 0.51}
Morphological Modifiers	verb+er_irreg	announce is to announcer as interpret is to	interpreter	interpreter	0.36	1	1	{'interpreter': 0.36, '': 0.03, '?': 0.03}	0	0.357422	0	1	context	context|target	0.51	TRUE	TRUE	TRUE	target	{'interpreter': 0.51, 'interpret': 0.48}
Semantic Relations	antonyms_gradable	introvert is to extravert as sweet is to	sour	sour	0.36	1	1	{'sour': 0.36, 'bitter': 0.13, 'salty': 0.12, '__': 0.03, '______': 0.03}	0	0.361328	0	1	context	context|target	0.51	TRUE	TRUE	TRUE	target	{'sour': 0.51, 'sweet': 0.5}
Verbal & Grammatical Forms	verb_Ving_3pSg	exists is to existing as receives is to	receiving	receiving	0.36	1	1	{'receiving': 0.36, 'received': 0.12, 'reception': 0.02, '______': 0.02, 'being': 0.02}	0	0.361328	0	1	context	context|target	0.51	TRUE	TRUE	TRUE	target	{'receiving': 0.51, 'receives': 0.5}
Verbal & Grammatical Forms	verb_inf_3pSg	considers is to consider as protects is to	protect	protect	0.36	1	1	{'protect': 0.36, 'protects': 0.1, 'consider': 0.04, 'guard': 0.02, 'defend': 0.01}	0	0.357422	0	1	context	context|target	0.51	TRUE	TRUE	TRUE	target	{'protect': 0.51, 'protects': 0.5}
Verbal & Grammatical Forms	verb_inf_3pSg	identify is to identifies as send is to	sends	sends	0.36	1	1	{'sends': 0.36, 'send': 0.09, 'sent': 0.08, 'sending': 0.04, 'receives': 0.02}	0	0.359375	0	1	context	context|target	0.51	TRUE	TRUE	TRUE	target	{'sends': 0.51, 'send': 0.51}
Verbal & Grammatical Forms	verb_3pSg_Ved	applies is to applied as replaces is to	replaced	replaced	0.36	1	1	{'replaced': 0.36, 'replaces': 0.36, 'replace': 0.02, 'replacements': 0.02, 'repl': 0.02}	0	0.363281	0	1	context	context|target	0.51	TRUE	TRUE	TRUE	target	{'replaced': 0.51, 'replaces': 0.5}
[truncated: 3,775 more rows]

## Sheet: num_stats
	count	mean	std	min	25%	50%	75%	max
next_token_softmax	5181	0.307294	0.220456	0.02	0.13	0.24	0.44	0.99
next_token_precision@1	5181	0.581837	0.467227	0	0	1	1	1
[truncated: 6 more rows]

## Sheet: precision_stats
	FALSE	TRUE
precision@1	0.00714148	0.992859
[truncated: 2 more rows]

## Sheet: area_stats
area	proportion
[truncated: 5 more rows]

[truncated: 6 more sheets: domain_stats, unbunding_type_stats, extracted_factors_stats, generated_token_stats, next_token_precision@5_stats, best_item_type_stats]
