# Supplementary material
Source: ML conference proceedings conference paper supplement (https://openreview.net/forum?id=MSm0VFL9pq)
Supplement: supplementary_material [file domain_stats.xlsx]

## Sheet: cleaned_example
	target_vsa_cosine_sim								next_token_precision@1								next_token_precision@5								next_token_softmax								target_token_rank								target_token_softmax								target_token_softmax_diff
	count	mean	std	min	25%	50%	75%	max	count	mean	std	min	25%	50%	75%	max	count	mean	std	min	25%	50%	75%	max	count	mean	std	min	25%	50%	75%	max	count	mean	std	min	25%	50%	75%	max	count	mean	std	min	25%	50%	75%	max	count
domain
animal_shelter	1	-0.81		-0.81	-0.81	-0.81	-0.81	-0.81	1	0		0	0	0	0	0	1	1		1	1	1	1	1	1	0.08		0.08	0.08	0.08	0.08	0.08	1	1		1	1	1	1	1	1	0.05		0.05	0.05	0.05	0.05	0.05	1
[truncated: 15 more columns]

## Sheet: cleaned_example_key
	target_vsa_cosine_sim								next_token_precision@1								next_token_precision@5								next_token_softmax								target_token_rank								target_token_softmax								target_token_softmax_diff
	count	mean	std	min	25%	50%	75%	max	count	mean	std	min	25%	50%	75%	max	count	mean	std	min	25%	50%	75%	max	count	mean	std	min	25%	50%	75%	max	count	mean	std	min	25%	50%	75%	max	count	mean	std	min	25%	50%	75%	max	count
domain
animal_shelter	2	0.16	0.02	0.15	0.16	0.16	0.17	0.18	2	0	0	0	0	0	0	0	2	0.5	0.71	0	0.25	0.5	0.75	1	2	0.18	0.16	0.07	0.13	0.18	0.24	0.3	2	9	9.9	2	5.5	9	12.5	16	2	0.03	0.04	0.01	0.02	0.03	0.04	0.06	2
country_language	4	0.12	0.02	0.1	0.1	0.12	0.13	0.14	4	0	0	0	0	0	0	0	4	0.75	0.5	0	0.75	1	1	1	4	0.34	0.16	0.2	0.28	0.3	0.37	0.57	4	4.25	3.4	1	2.5	3.5	5.25	9	4	0.06	0.05	0.01	0.03	0.06	0.08	0.13	4
antonyms_binary	1	0.07		0.07	0.07	0.07	0.07	0.07	1	0		0	0	0	0	0	1	0		0	0	0	0	0	1	0.1		0.1	0.1	0.1	0.1	0.1	1	15		15	15	15	15	15	1	0.01		0.01	0.01	0.01	0.01	0.01	1
animal_sound	2	0.06	0.01	0.05	0.06	0.06	0.06	0.07	2	0	0	0	0	0	0	0	2	0	0	0	0	0	0	0	2	0.11	0.01	0.1	0.1	0.11	0.11	0.11	2	83.5	55.86	44	63.75	83.5	103.25	123	2	0	0	0	0	0	0	0	2
hypernyms_animals	58	0.06	0.01	0.05	0.05	0.06	0.06	0.07	58	0	0	0	0	0	0	0	58	0.02	0.13	0	0	0	0	1	58	0.13	0.09	0.05	0.08	0.11	0.15	0.5	58	87.86	148.24	1	16	32.5	66.25	629	58	0.01	0.02	0	0	0.01	0.01	0.1	58
hypernyms_misc	1	0.06		0.06	0.06	0.06	0.06	0.06	1	0		0	0	0	0	0	1	0		0	0	0	0	0	1	0.09		0.09	0.09	0.09	0.09	0.09	1	71		71	71	71	71	71	1	0		0	0	0	0	0	1
un+adj_reg	1	0.06		0.06	0.06	0.06	0.06	0.06	1	0		0	0	0	0	0	1	0		0	0	0	0	0	1	0.14		0.14	0.14	0.14	0.14	0.14	1	6		6	6	6	6	6	1	0.01		0.01	0.01	0.01	0.01	0.01	1
verb_3pSg_Ved	5	0.06	0.01	0.05	0.05	0.06	0.06	0.06	5	0.2	0.27	0	0	0	0.5	0.5	5	0.5	0.35	0	0.5	0.5	0.5	1	5	0.14	0.04	0.09	0.1	0.16	0.17	0.17	5	13.4	12.36	2	6	12	13	34	5	0.03	0.04	0	0.01	0.01	0.03	0.1	5
verb_Ving_3pSg	4	0.06	0	0.06	0.06	0.06	0.06	0.06	4	0	0	0	0	0	0	0	4	0.12	0.25	0	0	0	0.12	0.5	4	0.14	0.09	0.06	0.08	0.14	0.2	0.25	4	116.5	80.46	20	66.5	125.5	175.5	195	4	0	0	0	0	0	0	0	4
verb_Ving_Ved	3	0.06	0	0.06	0.06	0.06	0.06	0.06	3	0.33	0.58	0	0	0	0.5	1	3	0.5	0.5	0	0.25	0.5	0.75	1	3	0.17	0.04	0.13	0.15	0.16	0.18	0.21	3	2.67	2.52	0	1.5	3	4	5	3	0.09	0.1	0.03	0.03	0.04	0.12	0.21	3
verb_inf_Ved	4	0.06	0.01	0.05	0.05	0.06	0.06	0.06	4	0.25	0.5	0	0	0	0.25	1	4	1	0	1	1	1	1	1	4	0.2	0.05	0.13	0.18	0.2	0.22	0.24	4	1.75	1.71	0	0.75	1.5	2.5	4	4	0.11	0.08	0.04	0.07	0.08	0.12	0.22	4
verb_inf_3pSg	1	0.05		0.05	0.05	0.05	0.05	0.05	1	0		0	0	0	0	0	1	0		0	0	0	0	0	1	0.37		0.37	0.37	0.37	0.37	0.37	1	20		20	20	20	20	20	1	0		0	0	0	0	0	1
[truncated: 15 more columns]

## Sheet: cleaned_example_value
	target_vsa_cosine_sim								next_token_precision@1								next_token_precision@5								next_token_softmax								target_token_rank								target_token_softmax								target_token_softmax_diff
	count	mean	std	min	25%	50%	75%	max	count	mean	std	min	25%	50%	75%	max	count	mean	std	min	25%	50%	75%	max	count	mean	std	min	25%	50%	75%	max	count	mean	std	min	25%	50%	75%	max	count	mean	std	min	25%	50%	75%	max	count
domain
animal_shelter	11	0.17	0.05	0.09	0.15	0.16	0.18	0.28	11	0.09	0.3	0	0	0	0	1	11	0.09	0.3	0	0	0	0	1	11	0.11	0.05	0.05	0.08	0.1	0.12	0.22	11	19.27	17.57	0	10.5	18	22.5	67	11	0.03	0.04	0	0.01	0.01	0.03	0.14	11
name_occupation	2	0.14	0.01	0.13	0.13	0.14	0.14	0.14	2	0	0	0	0	0	0	0	2	1	0	1	1	1	1	1	2	0.08	0.01	0.08	0.08	0.08	0.09	0.09	2	1	0	1	1	1	1	1	2	0.07	0.01	0.06	0.07	0.07	0.07	0.08	2
country_language	5	0.1	0.01	0.09	0.09	0.11	0.11	0.12	5	0	0	0	0	0	0	0	5	1	0	1	1	1	1	1	5	0.26	0.19	0.13	0.17	0.18	0.23	0.59	5	1.6	0.55	1	1	2	2	2	5	0.08	0.03	0.04	0.06	0.08	0.11	0.12	5
name_nationality	1	0.1		0.1	0.1	0.1	0.1	0.1	1	0		0	0	0	0	0	1	1		1	1	1	1	1	1	0.07		0.07	0.07	0.07	0.07	0.07	1	1		1	1	1	1	1	1	0.07		0.07	0.07	0.07	0.07	0.07	1
UK_city_county	5	0.06	0	0.05	0.06	0.06	0.06	0.06	5	0	0	0	0	0	0	0	5	0	0	0	0	0	0	0	5	0.11	0.02	0.09	0.09	0.11	0.11	0.14	5	64.6	86.57	8	11	36	52	216	5	0.01	0.01	0	0	0	0.02	0.02	5
adjective_to_adverb	1	0.06		0.06	0.06	0.06	0.06	0.06	1	0		0	0	0	0	0	1	0		0	0	0	0	0	1	0.09		0.09	0.09	0.09	0.09	0.09	1	7		7	7	7	7	7	1	0.03		0.03	0.03	0.03	0.03	0.03	1
animal_sound	4	0.06	0	0.05	0.06	0.06	0.06	0.06	4	0.38	0.48	0	0	0.25	0.62	1	4	0.38	0.48	0	0	0.25	0.62	1	4	0.11	0.04	0.08	0.09	0.1	0.12	0.16	4	14.75	24.46	0	0	4	18.75	51	4	0.07	0.07	0	0.02	0.06	0.11	0.16	4
hypernyms_animals	4	0.06	0.01	0.05	0.05	0.06	0.06	0.06	4	0	0	0	0	0	0	0	4	0.12	0.25	0	0	0	0.12	0.5	4	0.12	0.03	0.09	0.1	0.13	0.15	0.15	4	327	340.99	1	61	299	565	709	4	0.04	0.07	0	0	0	0.04	0.14	4
antonyms_binary	4	0.06	0	0.06	0.06	0.06	0.06	0.06	4	0	0	0	0	0	0	0	4	0	0	0	0	0	0	0	4	0.16	0.06	0.08	0.13	0.18	0.2	0.21	4	2598.25	2510.64	39	860.25	2357	4095	5640	4	0	0	0	0	0	0	0	4
nationality_adjective	4	0.06	0	0.06	0.06	0.06	0.06	0.06	4	1	0	1	1	1	1	1	4	1	0	1	1	1	1	1	4	0.76	0.06	0.68	0.74	0.77	0.79	0.82	4	0	0	0	0	0	0	0	4	0.76	0.06	0.68	0.74	0.77	0.79	0.82	4
noun_plural_reg	1	0.06		0.06	0.06	0.06	0.06	0.06	1	0		0	0	0	0	0	1	0		0	0	0	0	0	1	0.18		0.18	0.18	0.18	0.18	0.18	1	5		5	5	5	5	5	1	0.02		0.02	0.02	0.02	0.02	0.02	1
plural_verbs	2	0.06	0.01	0.05	0.05	0.06	0.06	0.06	2	0	0	0	0	0	0	0	2	0.5	0.71	0	0.25	0.5	0.75	1	2	0.36	0.22	0.2	0.28	0.36	0.43	0.51	2	14	14.14	4	9	14	19	24	2	0.02	0.02	0	0.01	0.02	0.03	0.03	2
verb+able_reg	11	0.06	0.01	0.05	0.06	0.06	0.06	0.07	11	0.27	0.47	0	0	0	0.5	1	11	0.82	0.4	0	1	1	1	1	11	0.24	0.08	0.11	0.2	0.26	0.28	0.39	11	17.82	53.18	0	0.5	1	3	178	11	0.07	0.07	0	0.02	0.03	0.09	0.26	11
verb_3pSg_Ved	17	0.06	0	0.05	0.05	0.06	0.06	0.06	17	0.06	0.17	0	0	0	0	0.5	17	0.32	0.39	0	0	0	0.5	1	17	0.17	0.1	0.05	0.11	0.17	0.18	0.46	17	86.59	111.08	1	8	34	106	341	17	0.01	0.02	0	0	0	0.01	0.06	17
verb_Ving_3pSg	8	0.06	0	0.05	0.06	0.06	0.06	0.06	8	0.06	0.18	0	0	0	0	0.5	8	0.19	0.26	0	0	0	0.5	0.5	8	0.18	0.06	0.11	0.12	0.18	0.2	0.27	8	148.12	223.07	10	18	98.5	126.25	685	8	0	0.01	0	0	0	0.01	0.01	8
verb_Ving_Ved	7	0.06	0	0.06	0.06	0.06	0.06	0.07	7	0	0	0	0	0	0	0	7	0.14	0.38	0	0	0	0	1	7	0.14	0.06	0.08	0.09	0.13	0.18	0.25	7	27.71	24.86	2	6	25	47	61	7	0.01	0.02	0	0	0	0.01	0.06	7
verb_inf_3pSg	9	0.06	0.01	0.05	0.05	0.06	0.06	0.07	9	0.11	0.33	0	0	0	0	1	9	0.44	0.53	0	0	0	1	1	9	0.29	0.11	0.14	0.22	0.27	0.4	0.44	9	31.22	44.18	0	2	11	37	134	9	0.03	0.05	0	0	0.01	0.04	0.14	9
verb_inf_Ved	28	0.06	0.01	0.05	0.05	0.06	0.06	0.07	28	0.18	0.39	0	0	0	0	1	28	0.86	0.36	0	1	1	1	1	28	0.21	0.07	0.1	0.16	0.22	0.26	0.38	28	4.64	12.48	0	1	2	3	67	28	0.07	0.07	0	0.03	0.05	0.08	0.29	28
verb_inf_Ving	2	0.06	0	0.06	0.06	0.06	0.06	0.06	2	0	0	0	0	0	0	0	2	1	0	1	1	1	1	1	2	0.3	0.02	0.29	0.3	0.3	0.31	0.32	2	2.5	0.71	2	2.25	2.5	2.75	3	2	0.04	0.02	0.02	0.03	0.04	0.05	0.06	2
[truncated: 15 more columns]

## Sheet: cleaned_key
	target_vsa_cosine_sim								next_token_precision@1								next_token_precision@5								next_token_softmax								target_token_rank								target_token_softmax								target_token_softmax_diff
	count	mean	std	min	25%	50%	75%	max	count	mean	std	min	25%	50%	75%	max	count	mean	std	min	25%	50%	75%	max	count	mean	std	min	25%	50%	75%	max	count	mean	std	min	25%	50%	75%	max	count	mean	std	min	25%	50%	75%	max	count
domain
hypernyms_animals	3	0.06	0	0.06	0.06	0.06	0.06	0.06	3	0	0	0	0	0	0	0	3	0	0	0	0	0	0	0	3	0.08	0.01	0.07	0.08	0.09	0.09	0.09	3	145	48.88	93	122.5	152	171	190	3	0	0	0	0	0	0	0	3
hypernyms_misc	7	0.06	0	0.05	0.06	0.06	0.06	0.06	7	0	0	0	0	0	0	0	7	0.43	0.53	0	0	0	1	1	7	0.14	0.1	0.07	0.08	0.12	0.13	0.36	7	12.86	14.99	1	2	5	20	40	7	0.05	0.05	0.01	0.01	0.02	0.08	0.12	7
past_tense	1	0.06		0.06	0.06	0.06	0.06	0.06	1	0.5		0.5	0.5	0.5	0.5	0.5	1	0.5		0.5	0.5	0.5	0.5	0.5	1	0.19		0.19	0.19	0.19	0.19	0.19	1	451		451	451	451	451	451	1	0		0	0	0	0	0	1
verb_3pSg_Ved	2	0.06	0.01	0.05	0.05	0.06	0.06	0.06	2	0	0	0	0	0	0	0	2	0	0	0	0	0	0	0	2	0.2	0.01	0.19	0.2	0.2	0.2	0.21	2	566	247.49	391	478.5	566	653.5	741	2	0	0	0	0	0	0	0	2
[truncated: 15 more columns]

## Sheet: cleaned_original
	target_vsa_cosine_sim								next_token_precision@1								next_token_precision@5								next_token_softmax								target_token_rank								target_token_softmax								target_token_softmax_diff
	count	mean	std	min	25%	50%	75%	max	count	mean	std	min	25%	50%	75%	max	count	mean	std	min	25%	50%	75%	max	count	mean	std	min	25%	50%	75%	max	count	mean	std	min	25%	50%	75%	max	count	mean	std	min	25%	50%	75%	max	count
domain
name_occupation	1	-0.43		-0.43	-0.43	-0.43	-0.43	-0.43	1	1		1	1	1	1	1	1	1		1	1	1	1	1	1	0.3		0.3	0.3	0.3	0.3	0.3	1	0		0	0	0	0	0	1	0.3		0.3	0.3	0.3	0.3	0.3	1
name_nationality	6	-0.44	0.11	-0.66	-0.43	-0.39	-0.38	-0.35	6	0.17	0.41	0	0	0	0	1	6	0.33	0.52	0	0	0	0.75	1	6	0.24	0.15	0.05	0.16	0.22	0.35	0.44	6	5	3.58	0	2.25	6.5	7.75	8	6	0.03	0.03	0.01	0.02	0.02	0.04	0.09	6
country_language	8	-0.61	0.1	-0.71	-0.66	-0.64	-0.58	-0.4	8	0.88	0.35	0	1	1	1	1	8	1	0	1	1	1	1	1	8	0.22	0.09	0.15	0.18	0.18	0.21	0.43	8	0.5	1.41	0	0	0	0	4	8	0.19	0.11	0.04	0.16	0.18	0.21	0.43	8
animal_shelter	25	-0.81	0.04	-0.87	-0.84	-0.81	-0.79	-0.72	25	0.04	0.2	0	0	0	0	1	25	0.44	0.51	0	0	0	1	1	25	0.2	0.1	0.04	0.12	0.2	0.26	0.41	25	6.44	5.05	0	3	5	10	19	25	0.05	0.05	0.01	0.02	0.04	0.04	0.21	25
[truncated: 15 more columns]

## Sheet: context
	target_vsa_cosine_sim								next_token_precision@1								next_token_precision@5								next_token_softmax								target_token_rank								target_token_softmax								target_token_softmax_diff
	count	mean	std	min	25%	50%	75%	max	count	mean	std	min	25%	50%	75%	max	count	mean	std	min	25%	50%	75%	max	count	mean	std	min	25%	50%	75%	max	count	mean	std	min	25%	50%	75%	max	count	mean	std	min	25%	50%	75%	max	count
domain
capital_world	329	0.51	0.01	0.44	0.5	0.51	0.51	0.53	329	0.78	0.34	0	0.5	1	1	1	329	0.85	0.25	0	0.5	1	1	1	329	0.47	0.26	0.08	0.23	0.44	0.68	0.98	329	25	166.89	0	0	0	0	2431	329	0.44	0.29	0	0.2	0.42	0.67	0.98	329
verb_inf_Ving	365	0.51	0.02	0.24	0.5	0.51	0.51	0.54	365	0.71	0.45	0	0	1	1	1	365	0.9	0.3	0	1	1	1	1	365	0.33	0.22	0.04	0.14	0.27	0.45	0.96	365	2.73	13.29	0	0	0	1	197	365	0.3	0.24	0	0.1	0.25	0.45	0.96	365
verb_3pSg_Ved	249	0.51	0.01	0.45	0.5	0.51	0.51	0.54	249	0.63	0.45	0	0	1	1	1	249	0.92	0.24	0	1	1	1	1	249	0.36	0.18	0.05	0.21	0.34	0.5	0.85	249	1.73	8.8	0	0	0	1	134	249	0.29	0.22	0	0.1	0.24	0.46	0.85	249
country_capital	164	0.51	0.01	0.47	0.5	0.51	0.51	0.53	164	0.87	0.32	0	1	1	1	1	164	0.97	0.13	0.5	1	1	1	1	164	0.52	0.26	0.06	0.31	0.5	0.7	0.98	164	0.71	4.9	0	0	0	0	56	164	0.5	0.28	0	0.3	0.5	0.71	0.98	164
verb_inf_3pSg	470	0.51	0.04	0.08	0.51	0.51	0.52	0.54	470	0.63	0.47	0	0	1	1	1	470	0.87	0.31	0	1	1	1	1	470	0.28	0.2	0.04	0.13	0.21	0.37	0.99	470	7.7	41.21	0	0	0	2	597	470	0.24	0.23	0	0.06	0.18	0.36	0.99	470
verb_Ving_3pSg	302	0.51	0.02	0.33	0.5	0.51	0.52	0.54	302	0.47	0.45	0	0	0.5	1	1	302	0.81	0.37	0	1	1	1	1	302	0.25	0.16	0.05	0.12	0.21	0.34	0.86	302	10.58	60.39	0	0	1	4	818	302	0.15	0.16	0	0.04	0.1	0.19	0.86	302
re+verb_reg	151	0.51	0.02	0.35	0.5	0.51	0.52	0.54	151	0.26	0.43	0	0	0	0.5	1	151	0.55	0.44	0	0	0.5	1	1	151	0.49	0.21	0.06	0.32	0.48	0.66	0.95	151	18.16	75.03	0	0	2	10	874	151	0.19	0.28	0	0.01	0.04	0.28	0.95	151
verb+er_irreg	145	0.5	0.01	0.45	0.5	0.5	0.51	0.53	145	0.77	0.4	0	0.5	1	1	1	145	0.89	0.26	0	1	1	1	1	145	0.37	0.21	0.05	0.18	0.33	0.54	0.87	145	1.88	12.13	0	0	0	0	127	145	0.35	0.23	0	0.16	0.31	0.54	0.87	145
noun+less_reg	123	0.5	0.05	0.15	0.5	0.5	0.52	0.54	123	0.58	0.44	0	0	0.5	1	1	123	0.73	0.34	0	0.5	1	1	1	123	0.38	0.25	0.05	0.14	0.31	0.61	0.95	123	29.25	197.33	0	0	0	1	1942	123	0.34	0.27	0	0.09	0.25	0.59	0.95	123
verb+tion_irreg	129	0.5	0.01	0.45	0.5	0.5	0.5	0.53	129	0.44	0.46	0	0	0.5	1	1	129	0.68	0.4	0	0.5	1	1	1	129	0.26	0.2	0.03	0.1	0.21	0.36	0.87	129	5.15	14.93	0	0	0	4	122	129	0.21	0.21	0	0.04	0.12	0.28	0.87	129
verb+able_reg	187	0.5	0.03	0.23	0.5	0.5	0.51	0.54	187	0.61	0.46	0	0	1	1	1	187	0.76	0.38	0	0.5	1	1	1	187	0.31	0.21	0.06	0.12	0.24	0.44	0.92	187	4.98	17.57	0	0	0	1	132	187	0.27	0.24	0	0.08	0.2	0.42	0.92	187
verb_Ving_Ved	240	0.5	0.03	0.18	0.5	0.51	0.51	0.53	240	0.6	0.48	0	0	1	1	1	240	0.88	0.32	0	1	1	1	1	240	0.31	0.19	0.05	0.15	0.26	0.42	0.93	240	3.73	17.56	0	0	0	2	231	240	0.25	0.22	0	0.07	0.18	0.38	0.93	240
verb_inf_Ved	250	0.5	0.05	0.05	0.5	0.51	0.51	0.53	250	0.71	0.45	0	0	1	1	1	250	0.88	0.32	0	1	1	1	1	250	0.34	0.23	0.05	0.15	0.28	0.49	0.94	250	3.4	10.67	0	0	0	1	92	250	0.31	0.25	0	0.09	0.25	0.49	0.94	250
adj+ness_reg	104	0.49	0.05	0.07	0.5	0.5	0.51	0.52	104	0.62	0.41	0	0.5	0.5	1	1	104	0.78	0.31	0	0.5	1	1	1	104	0.37	0.23	0.05	0.15	0.33	0.55	0.86	104	0.89	2.3	0	0	0	1	15	104	0.32	0.24	0.01	0.1	0.28	0.5	0.86	104
adj+ly_reg	173	0.49	0.06	0.08	0.49	0.5	0.51	0.54	173	0.47	0.47	0	0	0.5	1	1	173	0.74	0.41	0	0.5	1	1	1	173	0.24	0.18	0.04	0.12	0.17	0.31	0.95	173	13.39	49.18	0	0	1	7	452	173	0.17	0.2	0	0.03	0.09	0.24	0.95	173
adj_superlative	190	0.49	0.05	0.06	0.5	0.5	0.51	0.53	190	0.47	0.45	0	0	0.5	1	1	190	0.64	0.4	0	0.5	0.75	1	1	190	0.22	0.16	0.05	0.11	0.17	0.27	0.8	190	12.79	65.83	0	0	0	4	665	190	0.17	0.17	0	0.03	0.11	0.25	0.77	190
male_female	47	0.49	0.03	0.4	0.49	0.5	0.5	0.54	47	0.61	0.44	0	0	1	1	1	47	0.71	0.39	0	0.5	1	1	1	47	0.3	0.23	0.06	0.12	0.21	0.4	0.97	47	36.23	151.6	0	0	0	3	954	47	0.26	0.25	0	0.05	0.2	0.36	0.97	47
verb+ment_irreg	227	0.49	0.05	0.19	0.5	0.51	0.51	0.54	227	0.62	0.48	0	0	1	1	1	227	0.82	0.36	0	1	1	1	1	227	0.21	0.16	0.02	0.11	0.16	0.27	0.87	227	4.52	13.29	0	0	0	2	90	227	0.18	0.17	0	0.05	0.14	0.26	0.87	227
animal_sound	74	0.49	0.06	0.06	0.5	0.5	0.51	0.52	74	0.19	0.29	0	0	0	0.5	1	74	0.29	0.34	0	0	0	0.5	1	74	0.18	0.14	0.06	0.08	0.11	0.24	0.66	74	54.62	104.38	0	0	9	48.5	515	74	0.08	0.12	0	0	0.02	0.1	0.55	74
adj_comparative	256	0.48	0.06	0.12	0.48	0.5	0.51	0.53	256	0.42	0.45	0	0	0.5	1	1	256	0.57	0.41	0	0	0.5	1	1	256	0.21	0.15	0.04	0.1	0.16	0.28	0.77	256	18.11	87.49	0	0	1	8	1265	256	0.16	0.17	0	0.02	0.07	0.26	0.77	256
antonyms_binary	40	0.48	0.09	0.06	0.49	0.5	0.5	0.52	40	0.5	0.49	0	0	0.5	1	1	40	0.62	0.48	0	0	1	1	1	40	0.35	0.27	0.05	0.11	0.22	0.55	0.89	40	98.95	387.26	0	0	0.5	23	2402	40	0.28	0.31	0	0	0.13	0.55	0.89	40
antonyms_gradable	93	0.48	0.07	0.11	0.49	0.5	0.51	0.52	93	0.69	0.44	0	0	1	1	1	93	0.85	0.34	0	1	1	1	1	93	0.32	0.21	0.05	0.13	0.28	0.52	0.75	93	7.12	26.37	0	0	0	1	187	93	0.29	0.23	0	0.07	0.25	0.49	0.75	93
un+adj_reg	57	0.48	0.07	0.08	0.49	0.5	0.51	0.52	57	0.7	0.44	0	0	1	1	1	57	0.87	0.31	0	1	1	1	1	57	0.27	0.17	0.07	0.16	0.24	0.37	0.75	57	1.68	4.96	0	0	0	1	29	57	0.25	0.18	0.01	0.11	0.22	0.36	0.75	57
family	17	0.47	0.1	0.07	0.49	0.5	0.5	0.51	17	0.65	0.49	0	0	1	1	1	17	0.88	0.33	0	1	1	1	1	17	0.27	0.21	0.06	0.11	0.19	0.37	0.86	17	1.88	3.95	0	0	0	1	12	17	0.25	0.22	0.02	0.08	0.19	0.37	0.86	17
present_participle	60	0.47	0.04	0.25	0.47	0.48	0.49	0.51	60	0.57	0.5	0	0	1	1	1	60	0.84	0.36	0	1	1	1	1	60	0.28	0.18	0.07	0.13	0.22	0.35	0.77	60	11.72	54.71	0	0	0	2	406	60	0.23	0.21	0	0.06	0.15	0.33	0.77	60
noun_plural_irreg	91	0.47	0.08	0.08	0.48	0.5	0.51	0.53	91	0.42	0.49	0	0	0	1	1	91	0.64	0.47	0	0	1	1	1	91	0.21	0.17	0.05	0.09	0.14	0.28	0.77	91	7.54	14.29	0	0	1	7	74	91	0.15	0.18	0	0.02	0.07	0.22	0.77	91
name_occupation	23	0.46	0.08	0.14	0.47	0.49	0.5	0.51	23	0.7	0.47	0	0	1	1	1	23	0.83	0.39	0	1	1	1	1	23	0.22	0.16	0.06	0.12	0.15	0.32	0.64	23	2.52	6.19	0	0	0	1	25	23	0.2	0.17	0.01	0.08	0.13	0.31	0.64	23
superlative	58	0.46	0.09	0.11	0.47	0.49	0.5	0.52	58	0.66	0.46	0	0	1	1	1	58	0.84	0.34	0	1	1	1	1	58	0.26	0.15	0.07	0.13	0.24	0.36	0.57	58	4.31	17.74	0	0	0	1	132	58	0.22	0.17	0	0.08	0.2	0.3	0.57	58
country_language	20	0.45	0.08	0.15	0.44	0.48	0.49	0.5	20	0.55	0.48	0	0	0.75	1	1	20	0.78	0.38	0	0.5	1	1	1	20	0.45	0.2	0.13	0.28	0.45	0.57	0.89	20	1.95	3.82	0	0	0	1.25	12	20	0.33	0.26	0.01	0.1	0.31	0.52	0.89	20
animal_shelter	20	0.45	0.09	0.12	0.46	0.47	0.49	0.5	20	0.3	0.47	0	0	0	1	1	20	0.3	0.47	0	0	0	1	1	20	0.14	0.07	0.07	0.1	0.14	0.16	0.38	20	1020.1	3908.32	0	0	26	99.5	17563	20	0.05	0.07	0	0	0.01	0.1	0.18	20
noun_plural_reg	90	0.44	0.1	0.06	0.43	0.48	0.5	0.53	90	0.43	0.49	0	0	0	1	1	90	0.69	0.45	0	0	1	1	1	90	0.2	0.15	0.05	0.1	0.15	0.26	0.7	90	12.74	33.21	0	0	1	11	211	90	0.13	0.16	0	0.02	0.08	0.17	0.7	90
hypernyms_misc	45	0.41	0.16	0.07	0.42	0.5	0.5	0.52	45	0.11	0.32	0	0	0	0	1	45	0.29	0.46	0	0	0	1	1	45	0.16	0.1	0.05	0.09	0.11	0.21	0.47	45	116.4	212.86	0	3	34	92	955	45	0.05	0.11	0	0	0	0.04	0.47	45
UK_city_county	8	0.4	0.17	0.07	0.4	0.48	0.5	0.5	8	0.25	0.27	0	0	0.25	0.5	0.5	8	0.31	0.26	0	0	0.5	0.5	0.5	8	0.23	0.26	0.07	0.1	0.11	0.23	0.84	8	644.12	1499.68	0	0	16	232.5	4297	8	0.09	0.13	0	0	0.03	0.14	0.37	8
past_tense	114	0.4	0.13	0.05	0.35	0.46	0.5	0.53	114	0.42	0.49	0	0	0	1	1	114	0.6	0.48	0	0	1	1	1	114	0.19	0.14	0.04	0.1	0.13	0.24	0.7	114	22.8	78.26	0	0	2	11	507	114	0.12	0.14	0	0.02	0.07	0.16	0.7	114
comparative	38	0.39	0.14	0.06	0.38	0.46	0.49	0.52	38	0.63	0.47	0	0	1	1	1	38	0.8	0.39	0	1	1	1	1	38	0.29	0.2	0.06	0.13	0.24	0.37	0.8	38	5.21	16.94	0	0	0	3	102	38	0.26	0.23	0	0.05	0.22	0.37	0.8	38
opposite	2	0.38	0.07	0.33	0.36	0.38	0.4	0.43	2	0.5	0.71	0	0.25	0.5	0.75	1	2	0.5	0.71	0	0.25	0.5	0.75	1	2	0.54	0.21	0.39	0.46	0.54	0.62	0.69	2	6.5	9.19	0	3.25	6.5	9.75	13	2	0.35	0.49	0	0.18	0.35	0.52	0.69	2
nationality_adjective	67	0.36	0.14	0.06	0.26	0.41	0.48	0.51	67	0.9	0.26	0	1	1	1	1	67	0.96	0.13	0.5	1	1	1	1	67	0.6	0.21	0.1	0.41	0.61	0.77	0.96	67	0.13	0.57	0	0	0	0	3	67	0.59	0.23	0.07	0.41	0.61	0.77	0.96	67
plural_verbs	20	0.34	0.14	0.1	0.22	0.38	0.45	0.51	20	0.38	0.48	0	0	0	1	1	20	0.85	0.33	0	1	1	1	1	20	0.21	0.14	0.06	0.12	0.18	0.25	0.51	20	11.35	31.95	0	0	1.5	2.25	139	20	0.16	0.16	0	0.03	0.12	0.17	0.51	20
plural	62	0.32	0.18	0.06	0.11	0.41	0.49	0.53	62	0.49	0.49	0	0	0.5	1	1	62	0.7	0.43	0	0.5	1	1	1	62	0.2	0.15	0.05	0.09	0.15	0.27	0.7	62	5.66	10.23	0	0	1	5.75	42	62	0.16	0.17	0	0.04	0.09	0.23	0.7	62
over+adj_reg	13	0.31	0.18	0.06	0.16	0.24	0.5	0.51	13	0.31	0.48	0	0	0	1	1	13	0.38	0.51	0	0	0	1	1	13	0.16	0.11	0.07	0.09	0.1	0.18	0.39	13	16.77	21.6	0	0	7	22	68	13	0.09	0.14	0	0.01	0.03	0.15	0.39	13
name_nationality	19	0.23	0.17	0.06	0.1	0.17	0.44	0.49	19	0.53	0.51	0	0	1	1	1	19	0.76	0.42	0	0.75	1	1	1	19	0.33	0.19	0.06	0.16	0.35	0.48	0.69	19	4.58	9	0	0	0	5	38	19	0.19	0.2	0.01	0.02	0.13	0.39	0.52	19
adjective_to_adverb	41	0.21	0.17	0.05	0.07	0.12	0.33	0.53	41	0.28	0.45	0	0	0	1	1	41	0.52	0.47	0	0	0.5	1	1	41	0.16	0.15	0.05	0.09	0.11	0.15	0.74	41	26.8	45.63	0	0	6	39	248	41	0.09	0.15	0	0	0.03	0.12	0.74	41
currency	3	0.08	0.02	0.06	0.07	0.08	0.08	0.09	3	0.17	0.29	0	0	0	0.25	0.5	3	0.5	0.5	0	0.25	0.5	0.75	1	3	0.11	0.04	0.09	0.09	0.09	0.12	0.16	3	19.67	30.66	0	2	4	29.5	55	3	0.07	0.08	0	0.02	0.05	0.1	0.16	3
hypernyms_animals	5	0.06	0.01	0.06	0.06	0.06	0.07	0.07	5	0.4	0.55	0	0	0	1	1	5	0.8	0.45	0	1	1	1	1	5	0.15	0.11	0.08	0.11	0.11	0.11	0.35	5	5	10.07	0	0	1	1	23	5	0.12	0.13	0.01	0.06	0.08	0.11	0.35	5
[truncated: 15 more columns]

## Sheet: example
	target_vsa_cosine_sim								next_token_precision@1								next_token_precision@5								next_token_softmax								target_token_rank								target_token_softmax								target_token_softmax_diff
	count	mean	std	min	25%	50%	75%	max	count	mean	std	min	25%	50%	75%	max	count	mean	std	min	25%	50%	75%	max	count	mean	std	min	25%	50%	75%	max	count	mean	std	min	25%	50%	75%	max	count	mean	std	min	25%	50%	75%	max	count
domain
noun_plural_irreg	15	0.49	0.03	0.42	0.49	0.5	0.5	0.52	15	0.33	0.49	0	0	0	1	1	15	0.73	0.46	0	0.5	1	1	1	15	0.16	0.12	0.06	0.1	0.12	0.17	0.57	15	7.53	13.56	0	0	1	6.5	40	15	0.08	0.07	0	0.03	0.08	0.14	0.2	15
animal_shelter	3	0.08	0.02	0.06	0.06	0.07	0.08	0.1	3	0	0	0	0	0	0	0	3	0	0	0	0	0	0	0	3	0.14	0.08	0.06	0.1	0.13	0.18	0.22	3	38	31.24	18	20	22	48	74	3	0.01	0	0	0	0.01	0.01	0.01	3
animal_sound	1	0.06		0.06	0.06	0.06	0.06	0.06	1	0		0	0	0	0	0	1	0		0	0	0	0	0	1	0.09		0.09	0.09	0.09	0.09	0.09	1	388		388	388	388	388	388	1	0		0	0	0	0	0	1
hyponyms_misc	1	0.06		0.06	0.06	0.06	0.06	0.06	1	0		0	0	0	0	0	1	1		1	1	1	1	1	1	0.1		0.1	0.1	0.1	0.1	0.1	1	4		4	4	4	4	4	1	0.04		0.04	0.04	0.04	0.04	0.04	1
math_division2	1	0.05		0.05	0.05	0.05	0.05	0.05	1	0		0	0	0	0	0	1	0		0	0	0	0	0	1	0.64		0.64	0.64	0.64	0.64	0.64	1	4279		4279	4279	4279	4279	4279	1	0		0	0	0	0	0	1
over+adj_reg	1	0.05		0.05	0.05	0.05	0.05	0.05	1	0		0	0	0	0	0	1	0		0	0	0	0	0	1	0.09		0.09	0.09	0.09	0.09	0.09	1	83		83	83	83	83	83	1	0		0	0	0	0	0	1
[truncated: 15 more columns]

## Sheet: example_key
	target_vsa_cosine_sim								next_token_precision@1								next_token_precision@5								next_token_softmax								target_token_rank								target_token_softmax								target_token_softmax_diff
	count	mean	std	min	25%	50%	75%	max	count	mean	std	min	25%	50%	75%	max	count	mean	std	min	25%	50%	75%	max	count	mean	std	min	25%	50%	75%	max	count	mean	std	min	25%	50%	75%	max	count	mean	std	min	25%	50%	75%	max	count
domain
name_occupation	36	0.19	0.13	0	0.09	0.18	0.22	0.51	36	0.5	0.49	0	0	0.5	1	1	36	0.72	0.44	0	0.38	1	1	1	36	0.15	0.08	0.06	0.1	0.12	0.19	0.38	36	6.28	16.05	0	0	0	4.25	81	36	0.1	0.08	0	0.04	0.09	0.15	0.31	36
name_nationality	44	0.15	0.08	-0.01	0.09	0.14	0.21	0.34	44	0.65	0.48	0	0	1	1	1	44	0.88	0.33	0	1	1	1	1	44	0.2	0.1	0.05	0.11	0.18	0.24	0.45	44	4.52	21.37	0	0	0	2	142	44	0.14	0.1	0	0.05	0.11	0.2	0.4	44
country_language	70	0.12	0.1	-0.03	0.06	0.11	0.18	0.45	70	0.3	0.45	0	0	0	1	1	70	0.66	0.43	0	0.12	1	1	1	70	0.23	0.17	0.08	0.11	0.15	0.25	0.76	70	4.67	6.98	0	0	2	5	36	70	0.1	0.12	0	0.03	0.06	0.13	0.76	70
animal_shelter	49	0.09	0.07	-0.01	0.06	0.08	0.1	0.31	49	0.04	0.2	0	0	0	0	1	49	0.14	0.35	0	0	0	0	1	49	0.18	0.12	0.05	0.1	0.13	0.23	0.56	49	87.41	264.43	0	7	15	32	1382	49	0.02	0.03	0	0	0.01	0.03	0.16	49
UK_city_county	75	0.08	0.12	-0.04	0	0.02	0.18	0.41	75	0.04	0.14	0	0	0	0	0.5	75	0.24	0.25	0	0	0	0.5	0.5	75	0.18	0.1	0.05	0.1	0.15	0.22	0.5	75	204.12	334.62	0	22	130	209.5	2108	75	0.02	0.06	0	0	0	0.01	0.5	75
math_division2	2	0.06	0.01	0.05	0.05	0.06	0.06	0.06	2	0	0	0	0	0	0	0	2	0	0	0	0	0	0	0	2	0.56	0.01	0.55	0.55	0.56	0.56	0.56	2	3652.5	1386.64	2672	3162.25	3652.5	4142.75	4633	2	0	0	0	0	0	0	0	2
hypernyms_animals	435	0.03	0.07	-0.05	-0.01	0.01	0.02	0.44	435	0.09	0.27	0	0	0	0	1	435	0.2	0.38	0	0	0	0	1	435	0.14	0.09	0.06	0.09	0.11	0.14	0.56	435	165.12	359.81	0	8	29	98.5	2562	435	0.03	0.07	0	0	0.01	0.03	0.54	435
antonyms_gradable	28	0.02	0.1	-0.05	-0.01	0	0.02	0.5	28	0.32	0.48	0	0	0	1	1	28	0.68	0.48	0	0	1	1	1	28	0.21	0.13	0.07	0.1	0.18	0.29	0.65	28	39.46	125.08	0	0	1	28.75	661	28	0.12	0.11	0	0.01	0.09	0.19	0.39	28
superlative	6	0.02	0.01	0.01	0.01	0.01	0.02	0.03	6	0.67	0.52	0	0.25	1	1	1	6	0.83	0.41	0	1	1	1	1	6	0.22	0.13	0.09	0.15	0.18	0.26	0.46	6	9.33	21.9	0	0	0	1.5	54	6	0.19	0.17	0	0.08	0.15	0.26	0.46	6
hypernyms_misc	240	0.02	0.08	-0.1	-0.01	0	0.02	0.45	240	0.05	0.21	0	0	0	0	1	240	0.11	0.31	0	0	0	0	1	240	0.14	0.07	0.05	0.08	0.11	0.16	0.45	240	231.45	421.54	0	19	60.5	191.5	3130	240	0.02	0.05	0	0	0	0.01	0.43	240
animal_sound	308	0.01	0.06	-0.05	-0.01	0	0.01	0.5	308	0.14	0.34	0	0	0	0	1	308	0.2	0.38	0	0	0	0	1	308	0.19	0.15	0.05	0.09	0.13	0.23	0.84	308	818.46	2895.07	0	10	59	538.75	38688	308	0.05	0.11	0	0	0	0.02	0.8	308
present_participle	6	0.01	0.01	0	0	0.01	0.02	0.02	6	0.5	0.55	0	0	0.5	1	1	6	0.67	0.52	0	0.25	1	1	1	6	0.2	0.05	0.12	0.19	0.2	0.22	0.27	6	17	29.01	0	0	0.5	22.75	71	6	0.13	0.11	0	0.03	0.15	0.19	0.27	6
adj+ness_reg	3	0.01	0.02	0	0	0.01	0.02	0.03	3	0.67	0.58	0	0.5	1	1	1	3	1	0	1	1	1	1	1	3	0.43	0.31	0.1	0.29	0.48	0.6	0.71	3	0.33	0.58	0	0	0	0.5	1	3	0.43	0.32	0.08	0.28	0.48	0.6	0.71	3
antonyms_binary	40	0	0.04	-0.1	-0.01	-0.01	0	0.18	40	0.35	0.47	0	0	0	1	1	40	0.5	0.49	0	0	0.5	1	1	40	0.28	0.2	0.03	0.13	0.22	0.37	0.79	40	103.32	201.56	0	0	3.5	90.25	764	40	0.18	0.24	0	0	0.03	0.32	0.79	40
verb_inf_Ved	32	0	0.02	-0.04	-0.01	0	0.01	0.04	32	0.25	0.44	0	0	0	0.25	1	32	0.69	0.47	0	0	1	1	1	32	0.25	0.12	0.1	0.18	0.22	0.29	0.71	32	6.5	14.27	0	0.75	1	6.5	73	32	0.12	0.15	0	0.02	0.07	0.19	0.71	32
past_tense	22	0	0.02	-0.03	-0.01	0	0.01	0.04	22	0.18	0.39	0	0	0	0	1	22	0.39	0.43	0	0	0.25	0.88	1	22	0.2	0.13	0.05	0.09	0.18	0.24	0.5	22	558.59	953.69	0	3.25	191	513	3229	22	0.04	0.07	0	0	0	0.04	0.22	22
country_capital	118	0	0.01	-0.03	-0.01	0	0.01	0.04	118	0.75	0.43	0	1	1	1	1	118	0.85	0.36	0	1	1	1	1	118	0.45	0.34	0.06	0.14	0.34	0.82	0.98	118	3.29	9.82	0	0	0	0	61	118	0.43	0.36	0	0.11	0.34	0.81	0.98	118
comparative	6	0	0.02	-0.03	-0.01	0.02	0.02	0.03	6	0.83	0.41	0	1	1	1	1	6	1	0	1	1	1	1	1	6	0.23	0.12	0.08	0.19	0.2	0.26	0.43	6	0.33	0.82	0	0	0	0	2	6	0.2	0.13	0.07	0.1	0.19	0.21	0.43	6
adjective_to_adverb	26	0	0.01	-0.02	-0.01	0	0.01	0.03	26	0.23	0.43	0	0	0	0	1	26	0.37	0.48	0	0	0	1	1	26	0.15	0.13	0.05	0.08	0.12	0.17	0.69	26	23.96	34.55	0	1	8.5	37.75	125	26	0.08	0.15	0	0	0.02	0.11	0.69	26
adj_superlative	8	0	0.02	-0.04	-0.01	0	0.01	0.01	8	0.25	0.46	0	0	0	0.25	1	8	0.31	0.46	0	0	0	0.62	1	8	0.21	0.27	0.06	0.07	0.09	0.19	0.84	8	26.38	25.48	0	2.25	25	51	56	8	0.15	0.3	0	0	0.01	0.1	0.84	8
capital_world	474	0	0.02	-0.05	-0.01	0	0.01	0.04	474	0.34	0.46	0	0	0	1	1	474	0.51	0.46	0	0	0.5	1	1	474	0.28	0.23	0.05	0.13	0.2	0.31	0.98	474	542.66	5239.94	0	0	2	19	68282	474	0.19	0.27	0	0.01	0.07	0.25	0.98	474
currency	62	0	0.02	-0.03	-0.01	0	0.01	0.05	62	0.38	0.46	0	0	0	1	1	62	0.61	0.45	0	0	1	1	1	62	0.25	0.11	0.06	0.16	0.25	0.33	0.57	62	69.82	333.51	0	0	1	7	2066	62	0.16	0.14	0	0.02	0.13	0.26	0.47	62
hyponyms_misc	50	0	0.01	-0.03	-0.01	0	0.01	0.03	50	0.13	0.32	0	0	0	0	1	50	0.34	0.46	0	0	0	1	1	50	0.2	0.14	0.05	0.09	0.16	0.29	0.62	50	40.82	69.58	0	2	13	41.5	300	50	0.07	0.12	0	0	0.01	0.07	0.49	50
nationality_adjective	43	0	0.01	-0.02	-0.01	0	0.01	0.03	43	0.71	0.44	0	0.25	1	1	1	43	0.93	0.21	0	1	1	1	1	43	0.53	0.28	0.13	0.29	0.51	0.76	0.98	43	0.42	0.96	0	0	0	0.5	5	43	0.5	0.31	0.06	0.2	0.51	0.76	0.98	43
noun_plural_irreg	2	0	0.01	0	0	0	0.01	0.01	2	0	0	0	0	0	0	0	2	0	0	0	0	0	0	0	2	0.07	0	0.07	0.07	0.07	0.07	0.07	2	28	15.56	17	22.5	28	33.5	39	2	0.01	0	0	0.01	0.01	0.01	0.01	2
noun_plural_reg	9	0	0.02	-0.02	-0.01	0	0.02	0.03	9	0.39	0.49	0	0	0	1	1	9	0.61	0.49	0	0	1	1	1	9	0.24	0.16	0.07	0.15	0.21	0.25	0.57	9	16.22	21.95	0	0	4	20	62	9	0.13	0.19	0	0.01	0.03	0.15	0.57	9
over+adj_reg	18	0	0.01	-0.03	-0.02	0	0.01	0.02	18	0.06	0.24	0	0	0	0	1	18	0.17	0.38	0	0	0	0	1	18	0.12	0.05	0.07	0.09	0.1	0.15	0.25	18	40.06	51.46	0	8.75	26	49.5	222	18	0.03	0.06	0	0	0.01	0.03	0.25	18
opposite	5	0	0.02	-0.02	-0.01	0	0	0.03	5	0.2	0.45	0	0	0	0	1	5	0.4	0.55	0	0	0	1	1	5	0.11	0.04	0.07	0.08	0.12	0.13	0.16	5	10.2	16.3	0	1	5	6	39	5	0.06	0.06	0	0.03	0.04	0.08	0.16	5
male_female	13	0	0.02	-0.03	-0.02	0	0.01	0.03	13	0.31	0.48	0	0	0	1	1	13	0.58	0.45	0	0	0.5	1	1	13	0.29	0.16	0.07	0.19	0.26	0.35	0.66	13	58.54	92.86	0	0	3	119	294	13	0.15	0.22	0	0	0.06	0.19	0.66	13
family	57	0	0.02	-0.04	-0.01	0	0.01	0.03	57	0.27	0.38	0	0	0	0.5	1	57	0.44	0.39	0	0	0.5	0.5	1	57	0.24	0.17	0.07	0.11	0.17	0.32	0.81	57	35.89	93.83	0	0	2	10	408	57	0.16	0.2	0	0.01	0.08	0.27	0.81	57
verb_inf_Ving	9	0	0.02	-0.02	-0.01	0	0.01	0.02	9	0.67	0.5	0	0	1	1	1	9	1	0	1	1	1	1	1	9	0.32	0.12	0.13	0.21	0.35	0.41	0.5	9	0.44	0.73	0	0	0	1	2	9	0.28	0.16	0.08	0.13	0.25	0.41	0.5	9
verb_inf_3pSg	28	0	0.01	-0.03	-0.01	0	0.01	0.03	28	0.21	0.42	0	0	0	0	1	28	0.43	0.5	0	0	0	1	1	28	0.26	0.12	0.1	0.18	0.24	0.32	0.54	28	14.21	18.76	0	1	10	19	83	28	0.07	0.14	0	0.01	0.01	0.06	0.54	28
un+adj_reg	5	0	0	-0.01	0	0	0	0	5	0.2	0.45	0	0	0	0	1	5	0.6	0.55	0	0	1	1	1	5	0.15	0.1	0.07	0.1	0.12	0.15	0.32	5	9.8	18.1	0	1	1	5	42	5	0.09	0.07	0	0.03	0.08	0.15	0.16	5
plural_verbs	6	0	0.02	-0.02	-0.02	-0.01	0.01	0.02	6	0.17	0.41	0	0	0	0	1	6	0.67	0.52	0	0.25	1	1	1	6	0.28	0.07	0.17	0.23	0.3	0.34	0.35	6	3.33	3.72	0	1	1.5	5.75	9	6	0.09	0.13	0.01	0.02	0.06	0.08	0.35	6
verb+able_reg	17	0	0.02	-0.03	-0.02	0	0.02	0.04	17	0.35	0.49	0	0	0	1	1	17	0.41	0.51	0	0	0	1	1	17	0.28	0.21	0.08	0.16	0.2	0.32	0.9	17	32.35	52.51	0	0	5	40	161	17	0.17	0.26	0	0	0.02	0.27	0.9	17
verb_Ving_3pSg	8	0	0.01	-0.02	-0.01	-0.01	0	0.01	8	0.56	0.5	0	0	0.75	1	1	8	0.81	0.26	0.5	0.5	1	1	1	8	0.23	0.16	0.07	0.11	0.17	0.33	0.52	8	3.38	4.31	0	0	2	5.25	12	8	0.16	0.18	0.01	0.03	0.1	0.22	0.52	8
verb_3pSg_Ved	16	0	0.01	-0.02	-0.01	0	0	0.02	16	0.06	0.25	0	0	0	0	1	16	0.28	0.45	0	0	0	0.62	1	16	0.2	0.16	0.07	0.15	0.16	0.2	0.77	16	184.5	316.58	0	18.5	69	181.25	1253	16	0.07	0.19	0	0	0	0.02	0.77	16
verb+tion_irreg	12	0	0.01	-0.01	0	0	0.01	0.02	12	0.5	0.37	0	0.38	0.5	0.62	1	12	0.62	0.31	0	0.5	0.5	1	1	12	0.29	0.26	0.08	0.11	0.16	0.36	0.88	12	1.92	6.02	0	0	0	0.25	21	12	0.27	0.27	0.01	0.08	0.17	0.37	0.88	12
verb_Ving_Ved	15	0	0.02	-0.03	-0.01	0	0.01	0.03	15	0.37	0.48	0	0	0	1	1	15	0.37	0.48	0	0	0	1	1	15	0.18	0.14	0.06	0.08	0.15	0.18	0.62	15	81.2	147.45	0	0	10	55.5	503	15	0.11	0.18	0	0	0.02	0.16	0.62	15
adj_comparative	7	-0.01	0.01	-0.02	-0.02	-0.01	0	0.01	7	0.29	0.39	0	0	0	0.5	1	7	0.29	0.39	0	0	0	0.5	1	7	0.2	0.13	0.08	0.09	0.13	0.3	0.39	7	32.14	39.05	0	1	12	61.5	88	7	0.12	0.18	0	0	0.02	0.21	0.39	7
plural	11	-0.01	0.01	-0.03	-0.01	0	0	0.01	11	0.18	0.4	0	0	0	0	1	11	0.36	0.5	0	0	0	1	1	11	0.11	0.03	0.07	0.1	0.1	0.12	0.18	11	8.73	9.31	0	2.5	6	12.5	30	11	0.05	0.05	0.01	0.02	0.03	0.06	0.18	11
noun+less_reg	3	-0.01	0.02	-0.03	-0.02	0	0	0	3	0.83	0.29	0.5	0.75	1	1	1	3	0.83	0.29	0.5	0.75	1	1	1	3	0.17	0.12	0.08	0.11	0.13	0.22	0.31	3	0	0	0	0	0	0	0	3	0.17	0.13	0.08	0.1	0.13	0.22	0.31	3
verb+ment_irreg	7	-0.01	0.01	-0.02	-0.02	-0.02	-0.01	0	7	0.29	0.49	0	0	0	0.5	1	7	0.29	0.49	0	0	0	0.5	1	7	0.15	0.12	0.06	0.08	0.1	0.18	0.38	7	38	34.39	0	9	45	54	95	7	0.09	0.16	0	0	0	0.13	0.38	7
re+verb_reg	1	-0.01		-0.01	-0.01	-0.01	-0.01	-0.01	1	0		0	0	0	0	0	1	1		1	1	1	1	1	1	0.36		0.36	0.36	0.36	0.36	0.36	1	1		1	1	1	1	1	1	0.16		0.16	0.16	0.16	0.16	0.16	1
adj+ly_reg	4	-0.02	0.01	-0.03	-0.03	-0.02	-0.02	0	4	0.5	0.58	0	0	0.5	1	1	4	0.5	0.58	0	0	0.5	1	1	4	0.36	0.35	0.07	0.12	0.26	0.5	0.84	4	130.75	160.17	0	0	98	228.75	327	4	0.31	0.4	0	0	0.19	0.5	0.84	4
verb+er_irreg	5	-0.02	0.01	-0.03	-0.02	-0.02	-0.01	0	5	0.6	0.42	0	0.5	0.5	1	1	5	0.7	0.45	0	0.5	1	1	1	5	0.27	0.14	0.06	0.25	0.28	0.33	0.45	5	471.2	1049.17	0	0	1	7	2348	5	0.21	0.19	0	0.03	0.25	0.33	0.45	5
[truncated: 15 more columns]

## Sheet: example_key&key
	target_vsa_cosine_sim								next_token_precision@1								next_token_precision@5								next_token_softmax								target_token_rank								target_token_softmax								target_token_softmax_diff
	count	mean	std	min	25%	50%	75%	max	count	mean	std	min	25%	50%	75%	max	count	mean	std	min	25%	50%	75%	max	count	mean	std	min	25%	50%	75%	max	count	mean	std	min	25%	50%	75%	max	count	mean	std	min	25%	50%	75%	max	count
domain
capital_world	1	0.05		0.05	0.05	0.05	0.05	0.05	1	1		1	1	1	1	1	1	1		1	1	1	1	1	1	0.87		0.87	0.87	0.87	0.87	0.87	1	0		0	0	0	0	0	1	0.87		0.87	0.87	0.87	0.87	0.87	1
country_capital	1	0.05		0.05	0.05	0.05	0.05	0.05	1	1		1	1	1	1	1	1	1		1	1	1	1	1	1	0.87		0.87	0.87	0.87	0.87	0.87	1	0		0	0	0	0	0	1	0.87		0.87	0.87	0.87	0.87	0.87	1
hypernyms_animals	2	0.05	0	0.05	0.05	0.05	0.05	0.05	2	0	0	0	0	0	0	0	2	0	0	0	0	0	0	0	2	0.08	0.01	0.07	0.07	0.08	0.08	0.08	2	20	7.07	15	17.5	20	22.5	25	2	0.01	0.01	0.01	0.01	0.01	0.02	0.02	2
past_tense	1	0.05		0.05	0.05	0.05	0.05	0.05	1	0		0	0	0	0	0	1	0		0	0	0	0	0	1	0.09		0.09	0.09	0.09	0.09	0.09	1	348		348	348	348	348	348	1	0		0	0	0	0	0	1
[truncated: 15 more columns]

## Sheet: example_value
	target_vsa_cosine_sim								next_token_precision@1								next_token_precision@5								next_token_softmax								target_token_rank								target_token_softmax								target_token_softmax_diff
	count	mean	std	min	25%	50%	75%	max	count	mean	std	min	25%	50%	75%	max	count	mean	std	min	25%	50%	75%	max	count	mean	std	min	25%	50%	75%	max	count	mean	std	min	25%	50%	75%	max	count	mean	std	min	25%	50%	75%	max	count
domain
verb+ment_irreg	1	0.72		0.72	0.72	0.72	0.72	0.72	1	0.5		0.5	0.5	0.5	0.5	0.5	1	0.5		0.5	0.5	0.5	0.5	0.5	1	0.35		0.35	0.35	0.35	0.35	0.35	1	0		0	0	0	0	0	1	0.35		0.35	0.35	0.35	0.35	0.35	1
noun_plural_irreg	37	0.53	0.15	0.16	0.48	0.53	0.62	0.77	37	0.03	0.16	0	0	0	0	1	37	0.16	0.35	0	0	0	0	1	37	0.29	0.17	0.08	0.15	0.25	0.37	0.77	37	53.78	95.39	0	7	14	49	426	37	0.03	0.06	0	0	0	0.02	0.34	37
plural	3	0.46	0.45	-0.03	0.26	0.54	0.7	0.86	3	0.67	0.58	0	0.5	1	1	1	3	0.67	0.58	0	0.5	1	1	1	3	0.55	0.36	0.16	0.38	0.61	0.74	0.87	3	3	5.2	0	0	0	4.5	9	3	0.5	0.43	0.02	0.31	0.61	0.74	0.87	3
verb+tion_irreg	1	0.35		0.35	0.35	0.35	0.35	0.35	1	0.5		0.5	0.5	0.5	0.5	0.5	1	0.5		0.5	0.5	0.5	0.5	0.5	1	0.17		0.17	0.17	0.17	0.17	0.17	1	0		0	0	0	0	0	1	0.17		0.17	0.17	0.17	0.17	0.17	1
antonyms_binary	3	0.28	0.18	0.08	0.21	0.34	0.38	0.42	3	0.33	0.58	0	0	0	0.5	1	3	0.67	0.58	0	0.5	1	1	1	3	0.49	0.29	0.16	0.36	0.57	0.65	0.73	3	6.67	8.33	0	2	4	10	16	3	0.06	0.09	0.01	0.01	0.01	0.08	0.16	3
comparative	1	0.17		0.17	0.17	0.17	0.17	0.17	1	1		1	1	1	1	1	1	1		1	1	1	1	1	1	0.65		0.65	0.65	0.65	0.65	0.65	1	0		0	0	0	0	0	1	0.65		0.65	0.65	0.65	0.65	0.65	1
animal_sound	38	0.14	0.15	-0.13	0.01	0.17	0.23	0.47	38	0.12	0.29	0	0	0	0	1	38	0.24	0.4	0	0	0	0.5	1	38	0.19	0.11	0.04	0.09	0.16	0.31	0.43	38	445.05	1128.22	0	6.25	38	437	6367	38	0.04	0.09	0	0	0	0.03	0.43	38
antonyms_gradable	3	0.12	0.01	0.12	0.12	0.12	0.12	0.13	3	0	0	0	0	0	0	0	3	0.33	0.58	0	0	0	0.5	1	3	0.2	0.2	0.06	0.08	0.1	0.26	0.43	3	9.33	7.51	2	5.5	9	13	17	3	0.03	0.03	0.01	0.02	0.02	0.05	0.07	3
hypernyms_animals	89	0.06	0.2	-0.8	0.09	0.1	0.13	0.19	89	0.06	0.22	0	0	0	0	1	89	0.29	0.41	0	0	0	0.5	1	89	0.12	0.05	0.06	0.09	0.11	0.15	0.23	89	71.67	171.65	0	3	8	29	919	89	0.03	0.04	0	0.01	0.02	0.05	0.23	89
nationality_adjective	3	0.06	0.05	0.01	0.04	0.07	0.08	0.1	3	0.33	0.58	0	0	0	0.5	1	3	0.33	0.58	0	0	0	0.5	1	3	0.4	0.44	0.14	0.15	0.16	0.54	0.91	3	6.67	6.51	0	3.5	7	10	13	3	0.32	0.51	0.03	0.03	0.03	0.47	0.91	3
verb+able_reg	5	0.01	0.02	-0.02	-0.01	0.02	0.03	0.03	5	0.2	0.45	0	0	0	0	1	5	0.6	0.55	0	0	1	1	1	5	0.24	0.16	0.06	0.12	0.28	0.29	0.47	5	4.6	5.03	0	1	2	9	11	5	0.12	0.2	0.01	0.01	0.04	0.05	0.47	5
verb_inf_3pSg	1	0		0	0	0	0	0	1	0		0	0	0	0	0	1	0.5		0.5	0.5	0.5	0.5	0.5	1	0.29		0.29	0.29	0.29	0.29	0.29	1	6		6	6	6	6	6	1	0.02		0.02	0.02	0.02	0.02	0.02	1
hyponyms_misc	36	0	0.01	-0.03	-0.01	0	0.01	0.03	36	0.25	0.42	0	0	0	0.5	1	36	0.47	0.49	0	0	0.25	1	1	36	0.17	0.12	0.06	0.09	0.14	0.2	0.53	36	16.81	22.61	0	1	7.5	22.5	88	36	0.08	0.13	0	0.01	0.03	0.08	0.53	36
verb_inf_Ving	6	0	0.01	-0.02	0	0.01	0.01	0.02	6	0	0	0	0	0	0	0	6	0.83	0.41	0	1	1	1	1	6	0.19	0.07	0.14	0.15	0.17	0.2	0.32	6	5.5	8.67	1	1	2	3.75	23	6	0.06	0.05	0.01	0.03	0.05	0.08	0.15	6
verb_inf_Ved	62	0	0.01	-0.03	-0.01	0	0.01	0.03	62	0.13	0.34	0	0	0	0	1	62	0.74	0.44	0	0.25	1	1	1	62	0.28	0.14	0.07	0.2	0.28	0.35	0.84	62	5.35	9.42	0	1	2	4.75	49	62	0.09	0.15	0	0.02	0.04	0.08	0.84	62
past_tense	2	0	0.01	-0.01	0	0	0	0.01	2	0	0	0	0	0	0	0	2	0	0	0	0	0	0	0	2	0.11	0	0.11	0.11	0.11	0.11	0.11	2	289.5	316.08	66	177.75	289.5	401.25	513	2	0	0	0	0	0	0	0	2
plural_verbs	1	-0.01		-0.01	-0.01	-0.01	-0.01	-0.01	1	1		1	1	1	1	1	1	1		1	1	1	1	1	1	0.22		0.22	0.22	0.22	0.22	0.22	1	0		0	0	0	0	0	1	0.22		0.22	0.22	0.22	0.22	0.22	1
verb_3pSg_Ved	1	-0.02		-0.02	-0.02	-0.02	-0.02	-0.02	1	0		0	0	0	0	0	1	0.5		0.5	0.5	0.5	0.5	0.5	1	0.14		0.14	0.14	0.14	0.14	0.14	1	7		7	7	7	7	7	1	0.02		0.02	0.02	0.02	0.02	0.02	1
verb_Ving_Ved	2	-0.02	0.01	-0.03	-0.02	-0.02	-0.02	-0.01	2	0	0	0	0	0	0	0	2	0.5	0.71	0	0.25	0.5	0.75	1	2	0.22	0.13	0.13	0.18	0.22	0.26	0.31	2	265.5	371.23	3	134.25	265.5	396.75	528	2	0.01	0.01	0	0	0.01	0.01	0.02	2
hypernyms_misc	21	-0.02	0.39	-0.85	-0.16	0.17	0.23	0.42	21	0.05	0.22	0	0	0	0	1	21	0.24	0.44	0	0	0	0	1	21	0.14	0.06	0.06	0.1	0.12	0.18	0.27	21	46.86	76.51	0	5	19	53	299	21	0.03	0.06	0	0	0.01	0.03	0.24	21
UK_city_county	12	-0.04	0.09	-0.2	-0.05	0	0.01	0.03	12	0.04	0.14	0	0	0	0	0.5	12	0.21	0.26	0	0	0	0.5	0.5	12	0.2	0.13	0.07	0.1	0.16	0.23	0.46	12	120.75	116.19	0	6.5	105.5	208.75	339	12	0.06	0.13	0	0	0	0.03	0.46	12
name_occupation	32	-0.21	0.21	-0.88	-0.21	-0.16	-0.1	-0.03	32	0.5	0.51	0	0	0.5	1	1	32	0.75	0.44	0	0.75	1	1	1	32	0.19	0.09	0.04	0.13	0.19	0.24	0.43	32	3.66	10.28	0	0	0.5	3.5	58	32	0.13	0.1	0	0.04	0.13	0.21	0.36	32
country_language	26	-0.33	0.22	-0.82	-0.51	-0.25	-0.15	-0.09	26	0.38	0.5	0	0	0	1	1	26	0.77	0.43	0	1	1	1	1	26	0.26	0.14	0.08	0.15	0.24	0.36	0.59	26	3.96	7.34	0	0	1	3.75	30	26	0.16	0.15	0.01	0.05	0.11	0.26	0.59	26
name_nationality	17	-0.36	0.25	-0.88	-0.48	-0.23	-0.22	-0.14	17	0.38	0.49	0	0	0	1	1	17	1	0	1	1	1	1	1	17	0.13	0.05	0.06	0.1	0.12	0.15	0.26	17	1.24	1.3	0	0	1	2	4	17	0.09	0.05	0.03	0.06	0.07	0.13	0.18	17
animal_shelter	40	-0.69	0.27	-0.9	-0.88	-0.82	-0.68	-0.09	40	0.05	0.22	0	0	0	0	1	40	0.2	0.41	0	0	0	0	1	40	0.16	0.12	0.06	0.09	0.12	0.16	0.61	40	158.75	525.07	0	6	14.5	42.25	3026	40	0.02	0.03	0	0	0.01	0.03	0.15	40
[truncated: 15 more columns]

[truncated: 4 more sheets: example_value&key, greedy, key, original]
