# Supplementary material
Source: ML conference proceedings conference paper supplement (https://openreview.net/forum?id=MSm0VFL9pq)
Supplement: supplementary_material [file example.xlsx]

## Sheet: items
area	domain	doc	target	generated_token	next_token_softmax	next_token_precision@1	next_token_precision@5	top5_tokens	target_token_rank	target_token_softmax	target_token_softmax_diff	normalized_target_token_rank	unbunding_type	extracted_factors	target_vsa_cosine_sim	precision@1	precision@3	precision@5	best_item_type	vsa_sim
Verbal & Grammatical Forms	noun_plural_irreg	opportunity is to opportunities as series is to	series	series	0.16	1	1	{'series': 0.16, 'opportunities': 0.13, '______': 0.05, '__': 0.04, '': 0.03}	0	0.163086	0	1	example	example|target	0.52	TRUE	TRUE	TRUE	target	{'series': 0.52}
Verbal & Grammatical Forms	noun_plural_irreg	library is to libraries as series is to	series	books	0.1	0	1	{'books': 0.1, '______': 0.08, 'series': 0.08, '__': 0.04, 'novels': 0.04}	1	0.0751953	0.0273438	0.99999	example	example|target	0.51	TRUE	TRUE	TRUE	target	{'series': 0.51}
Verbal & Grammatical Forms	noun_plural_irreg	species is to species as variety is to	varieties	species	0.24	0	0	{'species': 0.24, 'variety': 0.23, 'genus': 0.11, 'subs': 0.07, 'race': 0.05}	39	0.00167084	0.238564	0.999611	example	example|target	0.51	TRUE	TRUE	TRUE	target	{'varieties': 0.51, 'variety': 0.47}
Verbal & Grammatical Forms	noun_plural_irreg	datum is to data as series is to	series	datum	0.12	0	0	{'datum': 0.12, 'numbers': 0.05, 'data': 0.04, '______': 0.04, 'number': 0.04}	14	0.0116577	0.106018	0.99986	example	example|target	0.51	TRUE	TRUE	TRUE	target	{'series': 0.51}
Verbal & Grammatical Forms	noun_plural_irreg	family is to families as species is to	species	species	0.2	1	1	{'species': 0.2, '______': 0.1, 'genus': 0.04, 'what': 0.04, 'animals': 0.04}	0	0.203125	0	1	example	example|target	0.5	TRUE	TRUE	TRUE	target	{'species': 0.5}
Verbal & Grammatical Forms	noun_plural_irreg	lives is to life as species is to	species	species	0.16	1	1	{'species': 0.16, 'evolution': 0.09, 'the': 0.07, 'spec': 0.05, 'living': 0.03}	0	0.164062	0	1	example	example|target	0.5	TRUE	TRUE	TRUE	target	{'species': 0.5}
Verbal & Grammatical Forms	noun_plural_irreg	communities is to community as species is to	species	ecosystem	0.12	0	1	{'ecosystem': 0.12, 'population': 0.1, '______': 0.06, 'species': 0.06, 'community': 0.06}	4	0.0554199	0.0622559	0.99996	example	example|target	0.5	TRUE	TRUE	TRUE	target	{'species': 0.5}
Verbal & Grammatical Forms	noun_plural_irreg	majorities is to majority as series is to	series	______	0.08	0	1	{'______': 0.08, 'series': 0.05, '': 0.04, '____': 0.03}	1	0.0549316	0.0300293	0.99999	example	example|target	0.5	TRUE	TRUE	TRUE	target	{'series': 0.5}
Verbal & Grammatical Forms	noun_plural_irreg	lives is to life as series is to	series	time	0.06	0	1	{'time': 0.06, 'parallel': 0.04, 'numbers': 0.04, 'series': 0.03, 'sequence': 0.02}	3	0.0339355	0.029541	0.99997	example	example|target	0.5	TRUE	TRUE	TRUE	target	{'series': 0.5}
Verbal & Grammatical Forms	noun_plural_irreg	century is to centuries as species is to	species	species	0.18	1	1	{'species': 0.18, 'centuries': 0.06, 'spec': 0.04, '______': 0.04, 'genus': 0.04}	0	0.181641	0	1	example	example|target	0.49	TRUE	TRUE	TRUE	target	{'species': 0.49}
Verbal & Grammatical Forms	noun_plural_irreg	responsibility is to responsibilities as series is to	series	series	0.11	1	1	{'series': 0.11, 'serial': 0.08, 'responsibilities': 0.06, '______': 0.03, 'responsibility': 0.03}	0	0.11377	0	1	example	example|target	0.49	TRUE	TRUE	TRUE	target	{'series': 0.49}
Verbal & Grammatical Forms	noun_plural_irreg	centuries is to century as species is to	species	genus	0.09	0	1	{'genus': 0.09, 'species': 0.09, '______': 0.08, 'century': 0.05, '__': 0.03}	1	0.0883789	0.00537109	0.99999	example	example|target	0.49	TRUE	TRUE	TRUE	target	{'species': 0.49}
Verbal & Grammatical Forms	noun_plural_irreg	data is to datum as series is to	series	______	0.07	0	0	{'______': 0.07, '_____': 0.06, '"': 0.05, '...': 0.04, 'what': 0.03}	9	0.020874	0.0518799	0.99991	example	example|target	0.49	TRUE	TRUE	TRUE	target	{'series': 0.49}
Verbal & Grammatical Forms	noun_plural_irreg	losses is to loss as species is to	species	extinction	0.12	0	1	{'extinction': 0.12, 'species': 0.08, '?': 0.07, '______': 0.06, '': 0.03}	1	0.0795898	0.0361328	0.99999	example	example|target	0.42	TRUE	TRUE	TRUE	target	{'species': 0.42}
Verbal & Grammatical Forms	noun_plural_irreg	families is to family as species is to	species	genus	0.57	0	0	{'genus': 0.57, '': 0.02, '______': 0.04, '?': 0.03}	40	0.00174713	0.564659	0.999601	example	example|target	0.42	TRUE	TRUE	TRUE	target	{'species': 0.42}
Semantic Relations	animal_shelter	fly is to nest as scorpion is to	nest	______	0.06	0	0	{'______': 0.06, '_____': 0.05, ':': 0.05, 'bur': 0.05, '': 0.05}	22	0.00622559	0.0567627	0.999781	example	example|target	0.1	TRUE	TRUE	TRUE	target	{'nest': 0.1}
Semantic Relations	animal_shelter	cockroach is to nest as rat is to	nest	_____	0.13	0	0	{'_____': 0.13, 'bur': 0.11, '______': 0.1, '__': 0.06, '____': 0.05}	18	0.00823975	0.120667	0.999821	example	example	0.07	TRUE	TRUE	TRUE	target	{}
Semantic Hierarchies	hyponyms_misc	pouch is to bag as pepper is to	spice	pepper	0.1	0	1	{'pepper': 0.1, '______': 0.1, 'salt': 0.08, 'spice': 0.04, 'what': 0.04}	4	0.0405273	0.0629883	0.99996	example	example	0.06	TRUE	TRUE	TRUE	target	{}
Semantic Relations	animal_shelter	hamster is to nest as hedgehog is to	nest	bur	0.22	0	0	{'bur': 0.22, '______': 0.05, '': 0.05, '_____': 0.05, 'what': 0.04}	74	0.00109863	0.222534	0.999263	example	example	0.06	TRUE	TRUE	TRUE	target	{}
Semantic Relations	animal_sound	meow is to cat as chirp is to	cricket	bird	0.09	0	0	{'bird': 0.09, 'what': 0.08, '______': 0.06, '': 0.06, ':': 0.05}	388	6.96182e-05	0.0887976	0.996134	example	example	0.06	TRUE	TRUE	TRUE	target	{}
Mathematics	math_division2	22 is to 11 as 100 is to	50	x	0.64	0	0	{'x': 0.64, 'y': 0.12, 'what': 0.08, 'X': 0.04, '': 0.03}	4279	3.11993e-08	0.644531	0.95736	example	example	0.05	TRUE	TRUE	TRUE	target	{}
Morphological Modifiers	over+adj_reg	arching is to overarching as sold is to	oversold	______	0.09	0	0	{'______': 0.09, 'sold': 0.08, '?': 0.08, '': 0.05}	83	0.00101471	0.0932236	0.999173	example	example	0.05	TRUE	TRUE	TRUE	target	{}

## Sheet: num_stats
	count	mean	std	min	25%	50%	75%	max
next_token_softmax	22	0.168636	0.150152	0.06	0.09	0.12	0.175	0.64
next_token_precision@1	22	0.227273	0.428932	0	0	0	0	1
next_token_precision@5	22	0.545455	0.509647	0	0	1	1	1
target_token_rank	22	226.409	908.931	0	1	4	34.75	4279
target_token_softmax	22	0.0593755	0.0663753	3.11993e-08	0.00286674	0.0372314	0.0861816	0.203125
target_token_softmax_diff	22	0.110968	0.173174	0	0.0108643	0.0543213	0.102819	0.644531
normalized_target_token_rank	22	0.997744	0.00905743	0.95736	0.999654	0.99996	0.99999	1
target_vsa_cosine_sim	22	0.354545	0.204607	0.05	0.0775	0.49	0.5	0.52

## Sheet: precision_stats
	TRUE
precision@1	1
precision@3	1
precision@5	1

## Sheet: area_stats
area	proportion
Verbal & Grammatical Forms	0.681818
Semantic Relations	0.181818
Semantic Hierarchies	0.0454545
Mathematics	0.0454545
Morphological Modifiers	0.0454545

## Sheet: domain_stats
domain	proportion
noun_plural_irreg	0.681818
animal_shelter	0.136364
hyponyms_misc	0.0454545
animal_sound	0.0454545
math_division2	0.0454545
over+adj_reg	0.0454545

## Sheet: unbunding_type_stats
unbunding_type	proportion
example	1

## Sheet: extracted_factors_stats
extracted_factors	proportion
example|target	0.727273
example	0.272727

## Sheet: generated_token_stats
generated_token	proportion
______	0.181818
species	0.181818
series	0.0909091
genus	0.0909091
datum	0.0454545
books	0.0454545
ecosystem	0.0454545
time	0.0454545
extinction	0.0454545
_____	0.0454545
pepper	0.0454545
bur	0.0454545
bird	0.0454545
x	0.0454545

## Sheet: next_token_precision@5_stats
next_token_precision@5	proportion
1	0.545455
0	0.454545

## Sheet: best_item_type_stats
best_item_type	proportion
target	1
