# Supplementary material
Source: ML conference proceedings conference paper supplement (https://openreview.net/forum?id=MSm0VFL9pq)
Supplement: supplementary_material [file extracted_factors_byArea.xlsx]

## Sheet: Factual Knowledge
	TRUE	FALSE	0.5
precision@1	0.898032	0.101968	0
precision@3	0.901489	0.0985106	0
precision@5	0.901649	0.0983511	0
next_token_precision@1	0.511223	0.340745	0.148032
next_token_precision@5	0.619628	0.161809	0.218564

## Sheet: Mathematics
	FALSE	TRUE
precision@1	0.911385	0.088615
precision@3	0.910945	0.0890552
precision@5	0.909918	0.0900822
next_token_precision@1	1	0
next_token_precision@5	1	0

## Sheet: Morphological Modifiers
	TRUE	FALSE	0.5
precision@1	0.985106	0.0148945	0
precision@3	0.989274	0.0107264	0
precision@5	0.989303	0.0106972	0
next_token_precision@1	0.462225	0.417454	0.120322
next_token_precision@5	0.617698	0.197447	0.184855

## Sheet: Semantic Hierarchies
	TRUE	FALSE	0.5
precision@1	0.580082	0.419918	0
precision@3	0.638694	0.361306	0
precision@5	0.677388	0.322612	0
next_token_precision@1	0.113469	0.853224	0.0333061
next_token_precision@5	0.222041	0.71102	0.0669388

## Sheet: Semantic Relations
	TRUE	FALSE	0.5
precision@1	0.923772	0.0762284	0
precision@3	0.948547	0.0514527	0
precision@5	0.949914	0.0500862	0
next_token_precision@1	0.486127	0.424871	0.0890024
next_token_precision@5	0.594498	0.275801	0.129701

## Sheet: Verbal & Grammatical Forms
	TRUE	FALSE	0.5
precision@1	0.958583	0.0414171	0
precision@3	0.965726	0.034274	0
precision@5	0.965822	0.0341779	0
next_token_precision@1	0.488453	0.441654	0.0698933
next_token_precision@5	0.742272	0.197316	0.0604119
