# Supplementary material
Source: ML conference proceedings conference paper supplement (https://openreview.net/forum?id=MSm0VFL9pq)
Supplement: supplementary_material [file extracted_factors_byDomain.xlsx]

## Sheet: capital_world
	TRUE	FALSE	0.5
precision@1	0.90142	0.09858	0
precision@3	0.902243	0.0977567	0
precision@5	0.902449	0.0975509	0
next_token_precision@1	0.474275	0.33227	0.193455
next_token_precision@5	0.571105	0.151677	0.277218

## Sheet: UK_city_county
	TRUE	FALSE	0.5
precision@1	0.848163	0.151837	0
precision@3	0.848163	0.151837	0
precision@5	0.848163	0.151837	0
next_token_precision@1	0	0.599184	0.400816
next_token_precision@5	0	0.383673	0.616327

## Sheet: country_language
	TRUE	FALSE	0.5
precision@1	0.926531	0.0734694	0
precision@3	0.941224	0.0587755	0
precision@5	0.941224	0.0587755	0
next_token_precision@1	0.620408	0.317551	0.0620408
next_token_precision@5	0.750204	0.117551	0.132245

## Sheet: name_occupation
	TRUE	FALSE	0.5
precision@1	0.952653	0.0473469	0
precision@3	0.954286	0.0457143	0
precision@5	0.955102	0.044898	0
next_token_precision@1	0.592653	0.386122	0.0212245
next_token_precision@5	0.782041	0.164082	0.0538776

## Sheet: currency
	TRUE	FALSE	0.5
precision@1	0.777714	0.222286	0
precision@3	0.794457	0.205543	0
precision@5	0.794457	0.205543	0
next_token_precision@1	0.457275	0.435912	0.106813
next_token_precision@5	0.564088	0.26963	0.166282

## Sheet: country_capital
	TRUE	FALSE	0.5
precision@1	0.946531	0.0534694	0
precision@3	0.946939	0.0530612	0
precision@5	0.946939	0.0530612	0
next_token_precision@1	0.793469	0.164898	0.0416327
next_token_precision@5	0.903265	0.0461224	0.0506122

## Sheet: name_nationality
	TRUE	FALSE	0.5
precision@1	0.91102	0.0889796	0
precision@3	0.916735	0.0832653	0
precision@5	0.916735	0.0832653	0
next_token_precision@1	0.636735	0.34449	0.0187755
next_token_precision@5	0.842449	0.141224	0.0163265

## Sheet: math_double
	FALSE	TRUE
precision@1	0.941808	0.0581921
precision@3	0.941243	0.0587571
precision@5	0.941243	0.0587571
next_token_precision@1	1	0
next_token_precision@5	1	0

## Sheet: math_squares
	FALSE	TRUE
precision@1	0.95098	0.0490196
precision@3	0.95098	0.0490196
precision@5	0.95098	0.0490196
next_token_precision@1	1	0
next_token_precision@5	1	0

## Sheet: math_root
	FALSE	TRUE
precision@1	0.833333	0.166667
precision@3	0.833333	0.166667
precision@5	0.833333	0.166667
next_token_precision@1	1	0
next_token_precision@5	1	0

[truncated: 42 more sheets: math_division2, math_cubes, math_division5, math_division10, adj_comparative, adj_superlative, verb+ment_irreg, verb+able_reg, adj+ness_reg, verb+tion_irreg, over+adj_reg, superlative, comparative, noun+less_reg, un+adj_reg, adj+ly_reg, re+verb_reg, verb+er_irreg, hypernyms_misc, hypernyms_animals …]
