# Supplementary material
Source: ML conference proceedings conference paper supplement (https://openreview.net/forum?id=MSm0VFL9pq)
Supplement: supplementary_material [file Factual Knowledge.xlsx]

## Sheet: items
area	domain	doc	target	generated_token	next_token_softmax	next_token_precision@1	next_token_precision@5	top5_tokens	target_token_rank	target_token_softmax	target_token_softmax_diff	normalized_target_token_rank	unbunding_type	extracted_factors	target_vsa_cosine_sim	precision@1	precision@3	precision@5	best_item_type	vsa_sim
Factual Knowledge	country_capital	Nairobi is to Kenya as Ottawa is to	canada	Canada	0.95	1	1	{'Canada': 0.95, '__': 0.01, '______': 0.01, '': 0.0, '_____': 0.0}	0	0.949219	0	1	key	key|target	1	TRUE	TRUE	TRUE	target	{'canada': 1.0}
Factual Knowledge	capital_world	Nairobi is to Kenya as Ottawa is to	canada	Canada	0.95	1	1	{'Canada': 0.95, '__': 0.01, '______': 0.01, '': 0.0, '_____': 0.0}	0	0.949219	0	1	key	key|target	1	TRUE	TRUE	TRUE	target	{'canada': 1.0}
Factual Knowledge	country_capital	Beirut is to Lebanon as Canberra is to	australia	Australia	0.93	1	1	{'Australia': 0.93, '______': 0.01, '__': 0.01, 'what': 0.0, 'the': 0.0}	0	0.925781	0	1	key	key|target	1	TRUE	TRUE	TRUE	target	{'australia': 1.0}
Factual Knowledge	country_capital	Nairobi is to Kenya as Stockholm is to	sweden	Sweden	0.93	1	1	{'Sweden': 0.93, 'Scandin': 0.01, '______': 0.01, 'what': 0.0, '__': 0.0}	0	0.925781	0	1	key	key|target	1	TRUE	TRUE	TRUE	target	{'sweden': 1.0}
Factual Knowledge	capital_world	Nairobi is to Kenya as Stockholm is to	sweden	Sweden	0.93	1	1	{'Sweden': 0.93, 'Scandin': 0.01, '______': 0.01, 'what': 0.0, '__': 0.0}	0	0.925781	0	1	key	key|target	1	TRUE	TRUE	TRUE	target	{'sweden': 1.0}
Factual Knowledge	capital_world	Beirut is to Lebanon as Canberra is to	australia	Australia	0.93	1	1	{'Australia': 0.93, '______': 0.01, '__': 0.01, 'what': 0.0, 'the': 0.0}	0	0.925781	0	1	key	key|target	1	TRUE	TRUE	TRUE	target	{'australia': 1.0}
Factual Knowledge	country_capital	Nairobi is to Kenya as Vienna is to	austria	Austria	0.9	1	1	{'Austria': 0.9, '______': 0.01, 'the': 0.01, 'what': 0.01, '__': 0.01}	0	0.898438	0	1	key	key|target	1	TRUE	TRUE	TRUE	target	{'austria': 1.0}
Factual Knowledge	country_capital	Nairobi is to Kenya as Oslo is to	norway	Norway	0.9	1	1	{'Norway': 0.9, 'A': 0.01, '______': 0.01, 'Sweden': 0.01, '__': 0.01}	0	0.902344	0	1	key	key|target	1	TRUE	TRUE	TRUE	target	{'norway': 1.0}
Factual Knowledge	capital_world	Nairobi is to Kenya as Oslo is to	norway	Norway	0.9	1	1	{'Norway': 0.9, 'A': 0.01, '______': 0.01, 'Sweden': 0.01, '__': 0.01}	0	0.902344	0	1	key	key|target	1	TRUE	TRUE	TRUE	target	{'norway': 1.0}
Factual Knowledge	capital_world	Nairobi is to Kenya as Vienna is to	austria	Austria	0.9	1	1	{'Austria': 0.9, '______': 0.01, 'the': 0.01, 'what': 0.01, '__': 0.01}	0	0.898438	0	1	key	key|target	1	TRUE	TRUE	TRUE	target	{'austria': 1.0}
Factual Knowledge	capital_world	Algiers is to Algeria as Bern is to	switzerland	Switzerland	0.9	1	1	{'Switzerland': 0.9, 'what': 0.01, '__': 0.01, 'which': 0.01, '______': 0.01}	0	0.898438	0	1	key	key|target	1	TRUE	TRUE	TRUE	target	{'switzerland': 1.0}
Factual Knowledge	country_capital	Santiago is to Chile as Stockholm is to	sweden	Sweden	0.88	1	1	{'Sweden': 0.88, '______': 0.02, '__': 0.01, 'what': 0.01, 'Scandin': 0.01}	0	0.882812	0	1	key	key|target	1	TRUE	TRUE	TRUE	target	{'sweden': 1.0}
Factual Knowledge	capital_world	Santiago is to Chile as Stockholm is to	sweden	Sweden	0.88	1	1	{'Sweden': 0.88, '______': 0.02, '__': 0.01, 'what': 0.01, 'Scandin': 0.01}	0	0.882812	0	1	key	key|target	1	TRUE	TRUE	TRUE	target	{'sweden': 1.0}
Factual Knowledge	country_capital	Beirut is to Lebanon as Bern is to	switzerland	Switzerland	0.87	1	1	{'Switzerland': 0.87, 'what': 0.01, 'which': 0.01, '__': 0.01, 'Germany': 0.01}	0	0.871094	0	1	key	key|target	1	TRUE	TRUE	TRUE	target	{'switzerland': 1.0}
Factual Knowledge	capital_world	Beirut is to Lebanon as Bern is to	switzerland	Switzerland	0.87	1	1	{'Switzerland': 0.87, 'what': 0.01, 'which': 0.01, '__': 0.01, 'Germany': 0.01}	0	0.871094	0	1	key	key|target	1	TRUE	TRUE	TRUE	target	{'switzerland': 1.0}
Factual Knowledge	capital_world	Warsaw is to Poland as Bern is to	switzerland	Switzerland	0.87	1	1	{'Switzerland': 0.87, 'what': 0.01, 'which': 0.01, '______': 0.01, 'Germany': 0.01}	0	0.867188	0	1	key	key|target	1	TRUE	TRUE	TRUE	target	{'switzerland': 1.0}
Factual Knowledge	country_capital	Nairobi is to Kenya as Tehran is to	iran	Iran	0.86	1	1	{'Iran': 0.86, 'what': 0.01, '______': 0.01, 'Pers': 0.01, '__': 0.01}	0	0.863281	0	1	key	key|target	1	TRUE	TRUE	TRUE	target	{'iran': 1.0}
Factual Knowledge	country_capital	Islamabad is to Pakistan as Lima is to	peru	Peru	0.86	1	1	{'Peru': 0.86, 'what': 0.02, '______': 0.02, '__': 0.01, 'which': 0.01}	0	0.855469	0	1	key	key|target	1	TRUE	TRUE	TRUE	target	{'peru': 1.0}
Factual Knowledge	capital_world	Nairobi is to Kenya as Tehran is to	iran	Iran	0.86	1	1	{'Iran': 0.86, 'what': 0.01, '______': 0.01, 'Pers': 0.01, '__': 0.01}	0	0.863281	0	1	key	key|target	1	TRUE	TRUE	TRUE	target	{'iran': 1.0}
Factual Knowledge	capital_world	Islamabad is to Pakistan as Lima is to	peru	Peru	0.86	1	1	{'Peru': 0.86, 'what': 0.02, '______': 0.02, '__': 0.01, 'which': 0.01}	0	0.855469	0	1	key	key|target	1	TRUE	TRUE	TRUE	target	{'peru': 1.0}
Factual Knowledge	country_capital	Jakarta is to Indonesia as Lima is to	peru	Peru	0.85	1	1	{'Peru': 0.85, 'what': 0.03, '______': 0.01, '__': 0.01, 'Per': 0.01}	0	0.851562	0	1	key	key|target	1	TRUE	TRUE	TRUE	target	{'peru': 1.0}
Factual Knowledge	capital_world	Jakarta is to Indonesia as Lima is to	peru	Peru	0.85	1	1	{'Peru': 0.85, 'what': 0.03, '______': 0.01, '__': 0.01, 'Per': 0.01}	0	0.851562	0	1	key	key|target	1	TRUE	TRUE	TRUE	target	{'peru': 1.0}
Factual Knowledge	capital_world	Skopje is to Macedonia as Abuja is to	nigeria	Nigeria	0.84	1	1	{'Nigeria': 0.84, '______': 0.02, '__': 0.02, 'what': 0.01, '': 0.01}	0	0.839844	0	1	key	key|target	1	TRUE	TRUE	TRUE	target	{'nigeria': 1.0}
Factual Knowledge	capital_world	Algiers is to Algeria as Bucharest is to	romania	Romania	0.84	1	1	{'Romania': 0.84, 'what': 0.02, '______': 0.02, '__': 0.01, 'which': 0.01}	0	0.835938	0	1	key	key|target	1	TRUE	TRUE	TRUE	target	{'romania': 1.0}
Factual Knowledge	capital_world	Santiago is to Chile as Athens is to	greece	Greece	0.83	1	1	{'Greece': 0.83, '__': 0.03, '______': 0.02, 'what': 0.01, '_____': 0.01}	0	0.828125	0	1	key	key|target	1	TRUE	TRUE	TRUE	target	{'greece': 1.0}
Factual Knowledge	capital_world	Algiers is to Algeria as Amman is to	jordan	Jordan	0.83	1	1	{'Jordan': 0.83, '__': 0.03, 'what': 0.03, '______': 0.02, '___': 0.01}	0	0.828125	0	1	key	key|target	1	TRUE	TRUE	TRUE	target	{'jordan': 1.0}
Factual Knowledge	capital_world	Apia is to Samoa as Bratislava is to	slovakia	Slovakia	0.77	1	1	{'Slovakia': 0.77, 'the': 0.05, '______': 0.02, 'what': 0.02, '__': 0.01}	0	0.765625	0	1	key	key|target	1	TRUE	TRUE	TRUE	target	{'slovakia': 1.0}
Factual Knowledge	country_capital	Nairobi is to Kenya as Taipei is to	taiwan	Taiwan	0.76	1	1	{'Taiwan': 0.76, 'China': 0.02, '__': 0.02, '______': 0.02, 'the': 0.01}	0	0.757812	0	1	key	key|target	1	TRUE	TRUE	TRUE	target	{'taiwan': 1.0}
Factual Knowledge	capital_world	Nairobi is to Kenya as Taipei is to	taiwan	Taiwan	0.76	1	1	{'Taiwan': 0.76, 'China': 0.02, '__': 0.02, '______': 0.02, 'the': 0.01}	0	0.757812	0	1	key	key|target	1	TRUE	TRUE	TRUE	target	{'taiwan': 1.0}
Factual Knowledge	country_capital	Santiago is to Chile as Tehran is to	iran	Iran	0.74	1	1	{'Iran': 0.74, '______': 0.03, 'what': 0.03, '__': 0.02, '___': 0.01}	0	0.738281	0	1	key	key|target	1	TRUE	TRUE	TRUE	target	{'iran': 1.0}
Factual Knowledge	country_capital	Santiago is to Chile as Vienna is to	austria	Austria	0.74	1	1	{'Austria': 0.74, '______': 0.05, '__': 0.03, '_____': 0.02, 'what': 0.02}	0	0.742188	0	1	key	key|target	1	TRUE	TRUE	TRUE	target	{'austria': 1.0}
Factual Knowledge	capital_world	Santiago is to Chile as Vienna is to	austria	Austria	0.74	1	1	{'Austria': 0.74, '______': 0.05, '__': 0.03, '_____': 0.02, 'what': 0.02}	0	0.742188	0	1	key	key|target	1	TRUE	TRUE	TRUE	target	{'austria': 1.0}
Factual Knowledge	capital_world	Santiago is to Chile as Tehran is to	iran	Iran	0.74	1	1	{'Iran': 0.74, '______': 0.03, 'what': 0.03, '__': 0.02, '___': 0.01}	0	0.738281	0	1	key	key|target	1	TRUE	TRUE	TRUE	target	{'iran': 1.0}
Factual Knowledge	capital_world	Nairobi is to Kenya as Tripoli is to	libya	Libya	0.71	1	1	{'Libya': 0.71, '___': 0.02, ':': 0.02, 'what': 0.02, '______': 0.01}	0	0.707031	0	1	key	key|target	1	TRUE	TRUE	TRUE	target	{'libya': 1.0}
Factual Knowledge	capital_world	Algiers is to Algeria as Ankara is to	turkey	Turkey	0.71	1	1	{'Turkey': 0.71, '______': 0.05, '__': 0.05, 'what': 0.02, '____': 0.01}	0	0.714844	0	1	key	key|target	1	TRUE	TRUE	TRUE	target	{'turkey': 1.0}
Factual Knowledge	capital_world	Santiago is to Chile as Baghdad is to	iraq	Iraq	0.7	1	1	{'Iraq': 0.7, '______': 0.05, '__': 0.03, 'what': 0.03, '_____': 0.02}	0	0.699219	0	1	key	key|target	1	TRUE	TRUE	TRUE	target	{'iraq': 1.0}
Factual Knowledge	capital_world	Nairobi is to Kenya as Tunis is to	tunisia	Tunisia	0.67	1	1	{'Tunisia': 0.67, 'what': 0.04, '__': 0.03, '______': 0.02, 'which': 0.02}	0	0.671875	0	1	key	key|target	1	TRUE	TRUE	TRUE	target	{'tunisia': 1.0}
Factual Knowledge	capital_world	Algiers is to Algeria as Bratislava is to	slovakia	Slovakia	0.67	1	1	{'Slovakia': 0.67, 'the': 0.05, 'what': 0.05, '______': 0.03, '__': 0.03}	0	0.667969	0	1	key	key|target	1	TRUE	TRUE	TRUE	target	{'slovakia': 1.0}
Factual Knowledge	capital_world	Tunis is to Tunisia as Bratislava is to	slovakia	Slovakia	0.66	1	1	{'Slovakia': 0.66, 'what': 0.06, '______': 0.03, '__': 0.03, 'the': 0.02}	0	0.664062	0	1	key	key|target	1	TRUE	TRUE	TRUE	target	{'slovakia': 1.0}
Factual Knowledge	capital_world	Kabul is to Afghanistan as Hanoi is to	vietnam	Vietnam	0.66	1	1	{'Vietnam': 0.66, 'Viet': 0.05, '______': 0.04, 'North': 0.04, 'what': 0.03}	0	0.664062	0	1	key	key|target	1	TRUE	TRUE	TRUE	target	{'vietnam': 1.0}
Factual Knowledge	capital_world	Nairobi is to Kenya as Nassau is to	bahamas	the	0.65	0	1	{'the': 0.65, 'The': 0.16, 'Bahamas': 0.05, '______': 0.01, '___': 0.01}	2	0.0515137	0.596924	0.99998	key	key|target	1	TRUE	TRUE	TRUE	target	{'bahamas': 1.0}
Factual Knowledge	capital_world	Nairobi is to Kenya as Tirana is to	albania	Albania	0.65	1	1	{'Albania': 0.65, '______': 0.05, '__': 0.04, 'what': 0.04, 'which': 0.02}	0	0.652344	0	1	key	key|target	1	TRUE	TRUE	TRUE	target	{'albania': 1.0}
Factual Knowledge	capital_world	Caracas is to Venezuela as Hanoi is to	vietnam	Vietnam	0.64	1	1	{'Vietnam': 0.64, '______': 0.05, 'Viet': 0.04, 'what': 0.04, '__': 0.03}	0	0.640625	0	1	key	key|target	1	TRUE	TRUE	TRUE	target	{'vietnam': 1.0}
Factual Knowledge	capital_world	Tashkent is to Uzbekistan as Bern is to	switzerland	Switzerland	0.62	1	1	{'Switzerland': 0.62, 'what': 0.04, '__': 0.03, '______': 0.03, 'which': 0.03}	0	0.617188	0	1	key	key|target	1	TRUE	TRUE	TRUE	target	{'switzerland': 1.0}
Factual Knowledge	capital_world	Paramaribo is to Suriname as Tehran is to	iran	Iran	0.62	1	1	{'Iran': 0.62, 'what': 0.07, ':': 0.06, '__': 0.03, '______': 0.03}	0	0.617188	0	1	key	key|target	1	TRUE	TRUE	TRUE	target	{'iran': 1.0}
Factual Knowledge	capital_world	Jakarta is to Indonesia as Khartoum is to	sudan	Sudan	0.61	1	1	{'Sudan': 0.61, 'what': 0.07, 'the': 0.07, '__': 0.05, '______': 0.03}	0	0.609375	0	1	key	key|target	1	TRUE	TRUE	TRUE	target	{'sudan': 1.0}
Factual Knowledge	country_capital	Kabul is to Afghanistan as Lisbon is to	portugal	Portugal	0.6	1	1	{'Portugal': 0.6, 'what': 0.06, '__': 0.04, 'which': 0.03, '______': 0.03}	0	0.597656	0	1	key	key|target	1	TRUE	TRUE	TRUE	target	{'portugal': 1.0}
Factual Knowledge	capital_world	Kampala is to Uganda as Manila is to	philippines	the	0.6	0	1	{'the': 0.6, '______': 0.08, '__': 0.05, 'Philippines': 0.04, '___': 0.02}	3	0.0373535	0.564209	0.99997	key	key|target	1	TRUE	TRUE	TRUE	target	{'philippines': 1.0}
Factual Knowledge	capital_world	Kabul is to Afghanistan as Lisbon is to	portugal	Portugal	0.6	1	1	{'Portugal': 0.6, 'what': 0.06, '__': 0.04, 'which': 0.03, '______': 0.03}	0	0.597656	0	1	key	key|target	1	TRUE	TRUE	TRUE	target	{'portugal': 1.0}
Factual Knowledge	capital_world	Havana is to Cuba as Nassau is to	bahamas	the	0.59	0	1	{'the': 0.59, 'The': 0.15, 'Bahamas': 0.05, 'what': 0.02, '___': 0.02}	2	0.0466309	0.539307	0.99998	key	key|target	1	TRUE	TRUE	TRUE	target	{'bahamas': 1.0}
Factual Knowledge	country_capital	Nairobi is to Kenya as Sofia is to	bulgaria	Bulgaria	0.58	1	1	{'Bulgaria': 0.58, 'what': 0.07, 'which': 0.03, '______': 0.03, ':': 0.03}	0	0.582031	0	1	key	key|target	1	TRUE	TRUE	TRUE	target	{'bulgaria': 1.0}
Factual Knowledge	capital_world	Nairobi is to Kenya as Sofia is to	bulgaria	Bulgaria	0.58	1	1	{'Bulgaria': 0.58, 'what': 0.07, 'which': 0.03, '______': 0.03, ':': 0.03}	0	0.582031	0	1	key	key|target	1	TRUE	TRUE	TRUE	target	{'bulgaria': 1.0}
Factual Knowledge	capital_world	Kabul is to Afghanistan as Kigali is to	rwanda	Rwanda	0.55	1	1	{'Rwanda': 0.55, '______': 0.04, '__': 0.03, 'what': 0.03, 'which': 0.02}	0	0.554688	0	1	key	key|target	1	TRUE	TRUE	TRUE	target	{'rwanda': 1.0}
Factual Knowledge	capital_world	Jakarta is to Indonesia as Muscat is to	oman	Oman	0.54	1	1	{'Oman': 0.54, 'what': 0.06, 'which': 0.05, '?': 0.05, '__': 0.03}	0	0.535156	0	1	key	key|target	1	TRUE	TRUE	TRUE	target	{'oman': 1.0}
Factual Knowledge	capital_world	Kampala is to Uganda as Lima is to	peru	Peru	0.52	1	1	{'Peru': 0.52, '______': 0.09, '__': 0.05, 'what': 0.04, '___': 0.03}	0	0.523438	0	1	key	key|target	1	TRUE	TRUE	TRUE	target	{'peru': 1.0}
Factual Knowledge	capital_world	Stockholm is to Sweden as Bern is to	switzerland	Switzerland	0.5	1	1	{'Switzerland': 0.5, 'what': 0.05, '______': 0.04, 'which': 0.04, '?': 0.03}	0	0.5	0	1	key	key|target	1	TRUE	TRUE	TRUE	target	{'switzerland': 1.0}
Factual Knowledge	capital_world	Kathmandu is to Nepal as Khartoum is to	sudan	Sudan	0.49	1	1	{'Sudan': 0.49, 'what': 0.08, '__': 0.07, '______': 0.05, 'the': 0.03}	0	0.492188	0	1	key	key|target	1	TRUE	TRUE	TRUE	target	{'sudan': 1.0}
Factual Knowledge	capital_world	Jakarta is to Indonesia as Nicosia is to	cyprus	Cyprus	0.49	1	1	{'Cyprus': 0.49, 'which': 0.12, 'what': 0.11, '__': 0.04, '______': 0.03}	0	0.488281	0	1	key	key|target	1	TRUE	TRUE	TRUE	target	{'cyprus': 1.0}
Factual Knowledge	capital_world	Vientiane is to Laos as Ankara is to	turkey	Turkey	0.47	1	1	{'Turkey': 0.47, '______': 0.09, '__': 0.07, 'what': 0.06, 'which': 0.03}	0	0.470703	0	1	key	key|target	1	TRUE	TRUE	TRUE	target	{'turkey': 1.0}
Factual Knowledge	capital_world	Jakarta is to Indonesia as Rabat is to	morocco	Morocco	0.47	1	1	{'Morocco': 0.47, 'what': 0.1, '__': 0.05, 'which': 0.04, '______': 0.04}	0	0.472656	0	1	key	key|target	1	TRUE	TRUE	TRUE	target	{'morocco': 1.0}
Factual Knowledge	country_capital	Dhaka is to Bangladesh as Lima is to	peru	Peru	0.45	1	1	{'Peru': 0.45, '______': 0.09, 'what': 0.05, '__': 0.04, '___': 0.03}	0	0.453125	0	1	key	key|target	1	TRUE	TRUE	TRUE	target	{'peru': 1.0}
Factual Knowledge	capital_world	Dhaka is to Bangladesh as Lima is to	peru	Peru	0.45	1	1	{'Peru': 0.45, '______': 0.09, 'what': 0.05, '__': 0.04, '___': 0.03}	0	0.453125	0	1	key	key|target	1	TRUE	TRUE	TRUE	target	{'peru': 1.0}
Factual Knowledge	country_capital	Chile is to Santiago as Iran is to	tehran	Tehran	0.43	1	1	{'Tehran': 0.43, '______': 0.06, '__': 0.05, '___': 0.04, '____': 0.04}	0	0.429688	0	1	key	key|target	1	TRUE	TRUE	TRUE	target	{'tehran': 1.0}
Factual Knowledge	capital_world	Chile is to Santiago as Iran is to	tehran	Tehran	0.43	1	1	{'Tehran': 0.43, '______': 0.06, '__': 0.05, '___': 0.04, '____': 0.04}	0	0.429688	0	1	key	key|target	1	TRUE	TRUE	TRUE	target	{'tehran': 1.0}
Factual Knowledge	capital_world	Kathmandu is to Nepal as Nicosia is to	cyprus	Cyprus	0.41	1	1	{'Cyprus': 0.41, 'which': 0.08, '______': 0.07, 'what': 0.07, '__': 0.06}	0	0.414062	0	1	key	key|target	1	TRUE	TRUE	TRUE	target	{'cyprus': 1.0}
Factual Knowledge	capital_world	Tirana is to Albania as Abuja is to	nigeria	Nigeria	0.38	1	1	{'Nigeria': 0.38, '______': 0.13, '__': 0.09, '___': 0.03, '_____': 0.03}	0	0.384766	0	1	key	key|target	1	TRUE	TRUE	TRUE	target	{'nigeria': 1.0}
Factual Knowledge	capital_world	Montevideo is to Uruguay as Muscat is to	oman	Oman	0.37	1	1	{'Oman': 0.37, '__': 0.06, '____': 0.05, 'what': 0.05, '_____': 0.05}	0	0.373047	0	1	key	key|target	1	TRUE	TRUE	TRUE	target	{'oman': 1.0}
Factual Knowledge	capital_world	Guyana is to Georgetown as Norway is to	oslo	Oslo	0.21	1	1	{'Oslo': 0.21, '______': 0.12, ':': 0.04, '__': 0.05}	0	0.209961	0	1	key	key|target	1	TRUE	TRUE	TRUE	target	{'oslo': 1.0}
Factual Knowledge	capital_world	Dakar is to Senegal as Georgetown is to	guyana	Guy	0.47	0.5	0.5	{'Guy': 0.47, 'what': 0.05, '__': 0.05, '______': 0.04, 'which': 0.04}	0	0.46875	0	1	key	key|target	1	TRUE	TRUE	TRUE	target	{'guyana': 1.0}
Factual Knowledge	capital_world	Antananarivo is to Madagascar as Asmara is to	eritrea	E	0.45	0.5	0.5	{'E': 0.45, 'what': 0.15, 'which': 0.04, '?': 0.04, '__': 0.03}	13	0.00747681	0.441742	0.99987	key	key|target	1	TRUE	TRUE	TRUE	target	{'eritrea': 1.0}
Factual Knowledge	capital_world	Algiers is to Algeria as Bishkek is to	kyrgyzstan	Ky	0.44	0.5	0.5	{'Ky': 0.44, 'what': 0.1, 'which': 0.06, '?': 0.03, '__': 0.03}	0	0.441406	0	1	key	key|target	1	TRUE	TRUE	TRUE	target	{'kyrgyzstan': 1.0}
Factual Knowledge	capital_world	Chile is to Santiago as Albania is to	tirana	Tir	0.37	0.5	0.5	{'Tir': 0.37, '______': 0.04, '__': 0.03, ':': 0.03, '?': 0.02}	0	0.367188	0	1	key	key|target	1	TRUE	TRUE	TRUE	target	{'tirana': 1.0}
Factual Knowledge	capital_world	Lithuania is to Vilnius as Romania is to	bucharest	Buch	0.29	0.5	0.5	{'Buch': 0.29, '__': 0.06, '______': 0.06, 'B': 0.04, '"': 0.03}	0	0.285156	0	1	key	key|target	1	TRUE	TRUE	TRUE	target	{'bucharest': 1.0}
Factual Knowledge	capital_world	Nepal is to Kathmandu as Rwanda is to	kigali	K	0.29	0.5	0.5	{'K': 0.29, '______': 0.13, '__': 0.07, '____': 0.03, '_____': 0.03}	563	2.36034e-05	0.285133	0.99439	key	key|target	1	TRUE	TRUE	TRUE	target	{'kigali': 1.0}
Factual Knowledge	capital_world	Gaborone is to Botswana as Georgetown is to	guyana	which	0.24	0	0.5	{'which': 0.24, 'Guy': 0.21, 'what': 0.17, '______': 0.04, '__': 0.04}	1	0.208008	0.0273438	0.99999	key	key|target	1	TRUE	TRUE	TRUE	target	{'guyana': 1.0}
Factual Knowledge	capital_world	Canberra is to Australia as Georgetown is to	guyana	Malaysia	0.23	0	0.5	{'Malaysia': 0.23, 'Guy': 0.21, 'the': 0.09, '______': 0.05, 'what': 0.05}	1	0.213867	0.0136719	0.99999	key	key|target	1	TRUE	TRUE	TRUE	target	{'guyana': 1.0}
Factual Knowledge	capital_world	Liberia is to Monrovia as Montenegro is to	podgorica	Pod	0.21	0.5	0.5	{'Pod': 0.21, '__': 0.09, '______': 0.04, ':': 0.04, 'what': 0.04}	0	0.207031	0	1	key	key|target	1	TRUE	TRUE	TRUE	target	{'podgorica': 1.0}
Factual Knowledge	capital_world	Chisinau is to Moldova as Georgetown is to	guyana	Guy	0.18	0.5	0.5	{'Guy': 0.18, 'what': 0.16, 'the': 0.1, 'which': 0.08, '______': 0.06}	0	0.183594	0	1	key	key|target	1	TRUE	TRUE	TRUE	target	{'guyana': 1.0}
Factual Knowledge	capital_world	Chile is to Santiago as Jordan is to	amman	Am	0.16	0.5	0.5	{'Am': 0.16, '__': 0.14, '______': 0.11, 'A': 0.07, '___': 0.04}	0	0.158203	0	1	key	key|target	1	TRUE	TRUE	TRUE	target	{'amman': 1.0}
Factual Knowledge	capital_world	Mozambique is to Maputo as Liechtenstein is to	vaduz	Vad	0.15	0.5	0.5	{'Vad': 0.15, '__': 0.08, '______': 0.07, '': 0.04, ':': 0.04}	0	0.152344	0	1	key	key|target	1	TRUE	TRUE	TRUE	target	{'vaduz': 1.0}
Factual Knowledge	capital_world	Chile is to Santiago as Macedonia is to	skopje	Sk	0.15	0.5	0.5	{'Sk': 0.15, '______': 0.09, '__': 0.09, 'Athens': 0.06, 'what': 0.05}	0	0.15332	0	1	key	key|target	1	TRUE	TRUE	TRUE	target	{'skopje': 1.0}
Factual Knowledge	capital_world	Chile is to Santiago as Eritrea is to	asmara	As	0.14	0.5	0.5	{'As': 0.14, '__': 0.11, '______': 0.08, '?': 0.06, '____': 0.04}	0	0.137695	0	1	key	key|target	1	TRUE	TRUE	TRUE	target	{'asmara': 1.0}
Factual Knowledge	capital_world	Liberia is to Monrovia as Liechtenstein is to	vaduz	__	0.11	0	0.5	{'__': 0.11, 'Vad': 0.11, '______': 0.09, 'what': 0.06, 'Lie': 0.04}	1	0.110352	0	0.99999	key	key|target	1	TRUE	TRUE	TRUE	target	{'vaduz': 1.0}
Factual Knowledge	capital_world	Liberia is to Monrovia as Oman is to	muscat	______	0.1	0	0.5	{'______': 0.1, '____': 0.09, 'Mus': 0.08, '__': 0.08, '_____': 0.07}	3	0.0830078	0.0170898	0.99997	key	key|target	1	TRUE	TRUE	TRUE	target	{'muscat': 1.0}
Factual Knowledge	capital_world	Apia is to Samoa as Canberra is to	australia	Australia	0.97	1	1	{'Australia': 0.97, 'the': 0.01, '': 0.0, 'New': 0.0, 'mainland': 0.0}	0	0.96875	0	1	key	key|target	0.99	TRUE	TRUE	TRUE	target	{'australia': 0.99}
Factual Knowledge	country_capital	Beirut is to Lebanon as Kingston is to	jamaica	Jamaica	0.93	1	1	{'Jamaica': 0.93, '__': 0.01, '______': 0.01, 'what': 0.0, 'the': 0.0}	0	0.925781	0	1	key	key|target	0.99	TRUE	TRUE	TRUE	target	{'jamaica': 0.99}
Factual Knowledge	capital_world	Beirut is to Lebanon as Kingston is to	jamaica	Jamaica	0.93	1	1	{'Jamaica': 0.93, '__': 0.01, '______': 0.01, 'what': 0.0, 'the': 0.0}	0	0.925781	0	1	key	key|target	0.99	TRUE	TRUE	TRUE	target	{'jamaica': 0.99}
Factual Knowledge	capital_world	Helsinki is to Finland as Athens is to	greece	Greece	0.9	1	1	{'Greece': 0.9, '__': 0.01, '______': 0.01, 'what': 0.01, 'which': 0.0}	0	0.902344	0	1	key	key|target	0.99	TRUE	TRUE	TRUE	target	{'greece': 0.99}
Factual Knowledge	country_capital	Helsinki is to Finland as Lisbon is to	portugal	Portugal	0.88	1	1	{'Portugal': 0.88, '______': 0.01, 'which': 0.01, '__': 0.01, 'what': 0.01}	0	0.882812	0	1	key	key|target	0.99	TRUE	TRUE	TRUE	target	{'portugal': 0.99}
Factual Knowledge	capital_world	Helsinki is to Finland as Lisbon is to	portugal	Portugal	0.88	1	1	{'Portugal': 0.88, '______': 0.01, 'which': 0.01, '__': 0.01, 'what': 0.01}	0	0.882812	0	1	key	key|target	0.99	TRUE	TRUE	TRUE	target	{'portugal': 0.99}
Factual Knowledge	capital_world	Algiers is to Algeria as Budapest is to	hungary	Hungary	0.86	1	1	{'Hungary': 0.86, '______': 0.02, '__': 0.01, 'what': 0.01, 'Austria': 0.0}	0	0.863281	0	1	key	key|target	0.99	TRUE	TRUE	TRUE	target	{'hungary': 0.99}
Factual Knowledge	capital_world	Vilnius is to Lithuania as Bern is to	switzerland	Switzerland	0.84	1	1	{'Switzerland': 0.84, 'which': 0.01, 'what': 0.01, '__': 0.01, '______': 0.01}	0	0.84375	0	1	key	key|target	0.99	TRUE	TRUE	TRUE	target	{'switzerland': 0.99}
Factual Knowledge	capital_world	Baku is to Azerbaijan as Bucharest is to	romania	Romania	0.84	1	1	{'Romania': 0.84, '______': 0.03, '__': 0.02, 'what': 0.01, '_____': 0.01}	0	0.839844	0	1	key	key|target	0.99	TRUE	TRUE	TRUE	target	{'romania': 0.99}
Factual Knowledge	capital_world	Gaborone is to Botswana as Havana is to	cuba	Cuba	0.84	1	1	{'Cuba': 0.84, '______': 0.03, '__': 0.02, 'what': 0.01, '': 0.01}	0	0.839844	0	1	key	key|target	0.99	TRUE	TRUE	TRUE	target	{'cuba': 0.99}
Factual Knowledge	country_capital	Helsinki is to Finland as Lima is to	peru	Peru	0.83	1	1	{'Peru': 0.83, '______': 0.02, '__': 0.01, 'what': 0.01, 'Per': 0.01}	0	0.832031	0	1	key	key|target	0.99	TRUE	TRUE	TRUE	target	{'peru': 0.99}
Factual Knowledge	capital_world	Helsinki is to Finland as Lima is to	peru	Peru	0.83	1	1	{'Peru': 0.83, '______': 0.02, '__': 0.01, 'what': 0.01, 'Per': 0.01}	0	0.832031	0	1	key	key|target	0.99	TRUE	TRUE	TRUE	target	{'peru': 0.99}
Factual Knowledge	capital_world	Dakar is to Senegal as Havana is to	cuba	Cuba	0.81	1	1	{'Cuba': 0.81, '______': 0.03, ':': 0.02, '__': 0.02, 'what': 0.01}	0	0.808594	0	1	key	key|target	0.99	TRUE	TRUE	TRUE	target	{'cuba': 0.99}
Factual Knowledge	capital_world	Gaborone is to Botswana as Lisbon is to	portugal	Portugal	0.8	1	1	{'Portugal': 0.8, '______': 0.04, '__': 0.04, 'which': 0.02, 'what': 0.02}	0	0.804688	0	1	key	key|target	0.99	TRUE	TRUE	TRUE	target	{'portugal': 0.99}
Factual Knowledge	capital_world	Kathmandu is to Nepal as Kigali is to	rwanda	Rwanda	0.77	1	1	{'Rwanda': 0.77, '': 0.02, '______': 0.02, 'what': 0.01, '__': 0.01}	0	0.773438	0	1	key	key|target	0.99	TRUE	TRUE	TRUE	target	{'rwanda': 0.99}
Factual Knowledge	capital_world	Kabul is to Afghanistan as Cairo is to	egypt	Egypt	0.77	1	1	{'Egypt': 0.77, '______': 0.03, '__': 0.02, 'what': 0.02, '_____': 0.01}	0	0.773438	0	1	key	key|target	0.99	TRUE	TRUE	TRUE	target	{'egypt': 0.99}
Factual Knowledge	capital_world	Kathmandu is to Nepal as Lima is to	peru	Peru	0.76	1	1	{'Peru': 0.76, '______': 0.04, '__': 0.03, 'what': 0.02, '_____': 0.01}	0	0.757812	0	1	key	key|target	0.99	TRUE	TRUE	TRUE	target	{'peru': 0.99}
Factual Knowledge	capital_world	Muscat is to Oman as Tegucigalpa is to	honduras	Honduras	0.73	1	1	{'Honduras': 0.73, 'what': 0.05, '______': 0.04, '__': 0.03, 'which': 0.01}	0	0.730469	0	1	key	key|target	0.99	TRUE	TRUE	TRUE	target	{'honduras': 0.99}
Factual Knowledge	capital_world	Montevideo is to Uruguay as Tehran is to	iran	Iran	0.71	1	1	{'Iran': 0.71, '__': 0.03, '______': 0.03, 'what': 0.03, '___': 0.01}	0	0.714844	0	1	key	key|target	0.99	TRUE	TRUE	TRUE	target	{'iran': 0.99}
Factual Knowledge	capital_world	Baku is to Azerbaijan as Belmopan is to	belize	Belize	0.68	1	1	{'Belize': 0.68, 'what': 0.06, '______': 0.05, '__': 0.03, 'which': 0.02}	0	0.679688	0	1	key	key|target	0.99	TRUE	TRUE	TRUE	target	{'belize': 0.99}
Factual Knowledge	country_capital	Kabul is to Afghanistan as Lima is to	peru	Peru	0.66	1	1	{'Peru': 0.66, 'what': 0.04, '______': 0.04, '__': 0.03, '___': 0.01}	0	0.664062	0	1	key	key|target	0.99	TRUE	TRUE	TRUE	target	{'peru': 0.99}
Factual Knowledge	capital_world	Kabul is to Afghanistan as Lima is to	peru	Peru	0.66	1	1	{'Peru': 0.66, 'what': 0.04, '______': 0.04, '__': 0.03, '___': 0.01}	0	0.664062	0	1	key	key|target	0.99	TRUE	TRUE	TRUE	target	{'peru': 0.99}
Factual Knowledge	country_capital	Kabul is to Afghanistan as Manila is to	philippines	the	0.65	0	1	{'the': 0.65, '______': 0.05, 'Philippines': 0.04, '__': 0.04, '___': 0.02}	2	0.0429688	0.609375	0.99998	key	key|target	0.99	TRUE	TRUE	TRUE	target	{'philippines': 0.99}
Factual Knowledge	capital_world	Kabul is to Afghanistan as Manila is to	philippines	the	0.65	0	1	{'the': 0.65, '______': 0.05, 'Philippines': 0.04, '__': 0.04, '___': 0.02}	2	0.0429688	0.609375	0.99998	key	key|target	0.99	TRUE	TRUE	TRUE	target	{'philippines': 0.99}
Factual Knowledge	country_capital	Budapest is to Hungary as Havana is to	cuba	Cuba	0.64	1	1	{'Cuba': 0.64, '______': 0.07, '__': 0.03, 'what': 0.02, '_____': 0.02}	0	0.640625	0	1	key	key|target	0.99	TRUE	TRUE	TRUE	target	{'cuba': 0.99}
Factual Knowledge	capital_world	Budapest is to Hungary as Havana is to	cuba	Cuba	0.64	1	1	{'Cuba': 0.64, '______': 0.07, '__': 0.03, 'what': 0.02, '_____': 0.02}	0	0.640625	0	1	key	key|target	0.99	TRUE	TRUE	TRUE	target	{'cuba': 0.99}
Factual Knowledge	capital_world	Santiago is to Chile as Tripoli is to	libya	Libya	0.63	1	1	{'Libya': 0.63, 'what': 0.03, '___': 0.03, ':': 0.03, '__': 0.01}	0	0.632812	0	1	key	key|target	0.99	TRUE	TRUE	TRUE	target	{'libya': 0.99}
Factual Knowledge	capital_world	Nairobi is to Kenya as Tallinn is to	estonia	Estonia	0.62	1	1	{'Estonia': 0.62, 'which': 0.06, 'what': 0.06, ':': 0.02, '______': 0.02}	0	0.621094	0	1	key	key|target	0.99	TRUE	TRUE	TRUE	target	{'estonia': 0.99}
Factual Knowledge	capital_world	Tashkent is to Uzbekistan as Tehran is to	iran	Iran	0.62	1	1	{'Iran': 0.62, 'what': 0.05, '__': 0.03, ':': 0.02, 'which': 0.02}	0	0.625	0	1	key	key|target	0.99	TRUE	TRUE	TRUE	target	{'iran': 0.99}
Factual Knowledge	capital_world	Beirut is to Lebanon as Bratislava is to	slovakia	Slovakia	0.62	1	1	{'Slovakia': 0.62, 'the': 0.09, 'Czech': 0.04, '______': 0.03, 'what': 0.02}	0	0.625	0	1	key	key|target	0.99	TRUE	TRUE	TRUE	target	{'slovakia': 0.99}
Factual Knowledge	capital_world	Luanda is to Angola as Taipei is to	taiwan	Taiwan	0.61	1	1	{'Taiwan': 0.61, '__': 0.04, 'the': 0.04, '______': 0.03, 'China': 0.03}	0	0.605469	0	1	key	key|target	0.99	TRUE	TRUE	TRUE	target	{'taiwan': 0.99}
Factual Knowledge	capital_world	Stockholm is to Sweden as Madrid is to	spain	Spain	0.59	1	1	{'Spain': 0.59, '______': 0.07, 'what': 0.05, '_____': 0.02, '____': 0.02}	0	0.589844	0	1	key	key|target	0.99	TRUE	TRUE	TRUE	target	{'spain': 0.99}
Factual Knowledge	capital_world	Kathmandu is to Nepal as Minsk is to	belarus	Belarus	0.58	1	1	{'Belarus': 0.58, 'what': 0.06, 'which': 0.05, '______': 0.03, '': 0.02}	0	0.578125	0	1	key	key|target	0.99	TRUE	TRUE	TRUE	target	{'belarus': 0.99}
Factual Knowledge	capital_world	Kabul is to Afghanistan as Kampala is to	uganda	Uganda	0.55	1	1	{'Uganda': 0.55, '______': 0.07, '__': 0.05, 'what': 0.04, '_____': 0.03}	0	0.546875	0	1	key	key|target	0.99	TRUE	TRUE	TRUE	target	{'uganda': 0.99}
Factual Knowledge	capital_world	Paramaribo is to Suriname as Taipei is to	taiwan	Taiwan	0.53	1	1	{'Taiwan': 0.53, ':': 0.05, '______': 0.04, '__': 0.04, 'the': 0.03}	0	0.53125	0	1	key	key|target	0.99	TRUE	TRUE	TRUE	target	{'taiwan': 0.99}
Factual Knowledge	country_capital	Beirut is to Lebanon as Sofia is to	bulgaria	Bulgaria	0.52	1	1	{'Bulgaria': 0.52, 'what': 0.07, ':': 0.07, 'which': 0.04, '______': 0.04}	0	0.519531	0	1	key	key|target	0.99	TRUE	TRUE	TRUE	target	{'bulgaria': 0.99}
Factual Knowledge	capital_world	Montevideo is to Uruguay as Taipei is to	taiwan	Taiwan	0.52	1	1	{'Taiwan': 0.52, '______': 0.07, '__': 0.06, 'the': 0.02, 'China': 0.02}	0	0.519531	0	1	key	key|target	0.99	TRUE	TRUE	TRUE	target	{'taiwan': 0.99}
Factual Knowledge	capital_world	Luanda is to Angola as Tehran is to	iran	Iran	0.51	1	1	{'Iran': 0.51, 'what': 0.09, '______': 0.06, '__': 0.04, ':': 0.03}	0	0.511719	0	1	key	key|target	0.99	TRUE	TRUE	TRUE	target	{'iran': 0.99}
Factual Knowledge	capital_world	Kabul is to Afghanistan as Managua is to	nicaragua	Nicaragua	0.49	1	1	{'Nicaragua': 0.49, '______': 0.09, 'what': 0.07, '_____': 0.04, '__': 0.04}	0	0.488281	0	1	key	key|target	0.99	TRUE	TRUE	TRUE	target	{'nicaragua': 0.99}
Factual Knowledge	country_capital	Santiago is to Chile as Taipei is to	taiwan	Taiwan	0.46	1	1	{'Taiwan': 0.46, '______': 0.08, '__': 0.07, '_____': 0.04, '____': 0.03}	0	0.458984	0	1	key	key|target	0.99	TRUE	TRUE	TRUE	target	{'taiwan': 0.99}
Factual Knowledge	capital_world	Santiago is to Chile as Taipei is to	taiwan	Taiwan	0.46	1	1	{'Taiwan': 0.46, '______': 0.08, '__': 0.07, '_____': 0.04, '____': 0.03}	0	0.458984	0	1	key	key|target	0.99	TRUE	TRUE	TRUE	target	{'taiwan': 0.99}
Factual Knowledge	capital_world	Tashkent is to Uzbekistan as Baghdad is to	iraq	Iraq	0.44	1	1	{'Iraq': 0.44, 'what': 0.08, '__': 0.06, '______': 0.05, ':': 0.04}	0	0.443359	0	1	key	key|target	0.99	TRUE	TRUE	TRUE	target	{'iraq': 0.99}
Factual Knowledge	capital_world	Mozambique is to Maputo as Iran is to	tehran	Tehran	0.43	1	1	{'Tehran': 0.43, '__': 0.05, '______': 0.04, '': 0.03, '___': 0.03}	0	0.425781	0	1	key	key|target	0.99	TRUE	TRUE	TRUE	target	{'tehran': 0.99}
Factual Knowledge	country_capital	Ukraine is to Kiev as Iran is to	tehran	Tehran	0.41	1	1	{'Tehran': 0.41, '______': 0.08, '__': 0.06, '____': 0.05, '___': 0.04}	0	0.414062	0	1	key	key|target	0.99	TRUE	TRUE	TRUE	target	{'tehran': 0.99}
Factual Knowledge	capital_world	Harare is to Zimbabwe as Lima is to	peru	Peru	0.39	1	1	{'Peru': 0.39, 'what': 0.1, ':': 0.04, '______': 0.05}	0	0.394531	0	1	key	key|target	0.99	TRUE	TRUE	TRUE	target	{'peru': 0.99}
Factual Knowledge	capital_world	Stockholm is to Sweden as Abuja is to	nigeria	Nigeria	0.37	1	1	{'Nigeria': 0.37, '______': 0.13, '__': 0.07, '____': 0.04, '_____': 0.03}	0	0.371094	0	1	key	key|target	0.99	TRUE	TRUE	TRUE	target	{'nigeria': 0.99}
Factual Knowledge	capital_world	Kyrgyzstan is to Bishkek as Cuba is to	havana	Havana	0.33	1	1	{'Havana': 0.33, '': 0.07, ':': 0.06, '______': 0.04}	0	0.330078	0	1	key	key|target	0.99	TRUE	TRUE	TRUE	target	{'havana': 0.99}
Factual Knowledge	country_capital	Kenya is to Nairobi as Iran is to	tehran	Tehran	0.32	1	1	{'Tehran': 0.32, '______': 0.06, '__': 0.05, '___': 0.04, ':': 0.04}	0	0.324219	0	1	key	key|target	0.99	TRUE	TRUE	TRUE	target	{'tehran': 0.99}
Factual Knowledge	capital_world	Kenya is to Nairobi as Iran is to	tehran	Tehran	0.32	1	1	{'Tehran': 0.32, '______': 0.06, '__': 0.05, '___': 0.04, ':': 0.04}	0	0.324219	0	1	key	key|target	0.99	TRUE	TRUE	TRUE	target	{'tehran': 0.99}
Factual Knowledge	capital_world	Yerevan is to Armenia as Abuja is to	nigeria	Nigeria	0.32	1	1	{'Nigeria': 0.32, '______': 0.12, '__': 0.09, 'which': 0.04, '?': 0.04}	0	0.322266	0	1	key	key|target	0.99	TRUE	TRUE	TRUE	target	{'nigeria': 0.99}
Factual Knowledge	country_capital	Kabul is to Afghanistan as Tehran is to	iran	Iran	0.31	1	1	{'Iran': 0.31, 'what': 0.1, '__': 0.04, 'which': 0.04, ':': 0.04}	0	0.308594	0	1	key	key|target	0.99	TRUE	TRUE	TRUE	target	{'iran': 0.99}
Factual Knowledge	capital_world	Kabul is to Afghanistan as Tehran is to	iran	Iran	0.31	1	1	{'Iran': 0.31, 'what': 0.1, '__': 0.04, 'which': 0.04, ':': 0.04}	0	0.308594	0	1	key	key|target	0.99	TRUE	TRUE	TRUE	target	{'iran': 0.99}
Factual Knowledge	capital_world	Ljubljana is to Slovenia as Nicosia is to	cyprus	Cyprus	0.29	1	1	{'Cyprus': 0.29, 'what': 0.12, 'which': 0.12, '__': 0.06, '______': 0.05}	0	0.292969	0	1	key	key|target	0.99	TRUE	TRUE	TRUE	target	{'cyprus': 0.99}
Factual Knowledge	country_capital	Chile is to Santiago as Austria is to	vienna	Vienna	0.27	1	1	{'Vienna': 0.27, '__': 0.09, '______': 0.08, '____': 0.04, ':': 0.03}	0	0.271484	0	1	key	key|target	0.99	TRUE	TRUE	TRUE	target	{'vienna': 0.99}
Factual Knowledge	capital_world	Chile is to Santiago as Austria is to	vienna	Vienna	0.27	1	1	{'Vienna': 0.27, '__': 0.09, '______': 0.08, '____': 0.04, ':': 0.03}	0	0.271484	0	1	key	key|target	0.99	TRUE	TRUE	TRUE	target	{'vienna': 0.99}
Factual Knowledge	capital_world	Uruguay is to Montevideo as Iran is to	tehran	Tehran	0.22	1	1	{'Tehran': 0.22, '______': 0.08, '__': 0.06, '____': 0.04, '___': 0.04}	0	0.220703	0	1	key	key|target	0.99	TRUE	TRUE	TRUE	target	{'tehran': 0.99}
Factual Knowledge	capital_world	Tashkent is to Uzbekistan as Abuja is to	nigeria	Nigeria	0.21	1	1	{'Nigeria': 0.21, '__': 0.12, '______': 0.1, 'which': 0.07, 'what': 0.05}	0	0.214844	0	1	key	key|target	0.99	TRUE	TRUE	TRUE	target	{'nigeria': 0.99}
Factual Knowledge	country_capital	Kenya is to Nairobi as Norway is to	oslo	Oslo	0.18	1	1	{'Oslo': 0.18, '______': 0.1, ':': 0.04, '_____': 0.04}	0	0.177734	0	1	key	key|target	0.99	TRUE	TRUE	TRUE	target	{'oslo': 0.99}
Factual Knowledge	capital_world	Kenya is to Nairobi as Norway is to	oslo	Oslo	0.18	1	1	{'Oslo': 0.18, '______': 0.1, ':': 0.04, '_____': 0.04}	0	0.177734	0	1	key	key|target	0.99	TRUE	TRUE	TRUE	target	{'oslo': 0.99}
Factual Knowledge	capital_world	Uruguay is to Montevideo as Norway is to	oslo	Oslo	0.16	1	1	{'Oslo': 0.16, '______': 0.13, '__': 0.06, '____': 0.05, '_____': 0.04}	0	0.160156	0	1	key	key|target	0.99	TRUE	TRUE	TRUE	target	{'oslo': 0.99}
Factual Knowledge	capital_world	Uruguay is to Montevideo as Montenegro is to	podgorica	Pod	0.35	0.5	0.5	{'Pod': 0.35, '__': 0.05, ':': 0.03, '______': 0.03}	0	0.353516	0	1	key	key|target	0.99	TRUE	TRUE	TRUE	target	{'podgorica': 0.99}
Factual Knowledge	capital_world	Nepal is to Kathmandu as Belarus is to	minsk	M	0.27	0.5	0.5	{'M': 0.27, '______': 0.05, '__': 0.04, 'what': 0.03, ':': 0.03}	227	0.000144958	0.269386	0.997738	key	key|target	0.99	TRUE	TRUE	TRUE	target	{'minsk': 0.99}
Factual Knowledge	capital_world	Nepal is to Kathmandu as Cyprus is to	nicosia	N	0.22	0.5	0.5	{'N': 0.22, '__': 0.11, '______': 0.05, 'L': 0.05, '____': 0.04}	240	0.000106335	0.224503	0.997608	key	key|target	0.99	TRUE	TRUE	TRUE	target	{'nicosia': 0.99}
Factual Knowledge	capital_world	Nepal is to Kathmandu as Sudan is to	khartoum	Kh	0.16	0.5	0.5	{'Kh': 0.16, '__': 0.08, '______': 0.07, 'what': 0.04, '____': 0.04}	0	0.157227	0	1	key	key|target	0.99	TRUE	TRUE	TRUE	target	{'khartoum': 0.99}
Factual Knowledge	capital_world	Sweden is to Stockholm as Jordan is to	amman	Am	0.16	0.5	0.5	{'Am': 0.16, 'A': 0.1, '__': 0.07, '______': 0.05, '?': 0.05}	0	0.158203	0	1	key	key|target	0.99	TRUE	TRUE	TRUE	target	{'amman': 0.99}
Factual Knowledge	capital_world	Mozambique is to Maputo as Oman is to	muscat	Mus	0.13	0.5	0.5	{'Mus': 0.13, '__': 0.07, '____': 0.07, '_____': 0.06, '______': 0.06}	0	0.12793	0	1	key	key|target	0.99	TRUE	TRUE	TRUE	target	{'muscat': 0.99}
Factual Knowledge	capital_world	Uzbekistan is to Tashkent as Eritrea is to	asmara	As	0.13	0.5	0.5	{'As': 0.13, '?': 0.1, 'what': 0.07, '?"': 0.06, '__': 0.06}	0	0.129883	0	1	key	key|target	0.99	TRUE	TRUE	TRUE	target	{'asmara': 0.99}
Factual Knowledge	capital_world	Luanda is to Angola as Nassau is to	bahamas	the	0.46	0	0	{'the': 0.46, 'The': 0.22, '__': 0.05, '______': 0.05, '___': 0.03}	6	0.0284424	0.430542	0.99994	key	key|target	0.99	TRUE	TRUE	TRUE	target	{'bahamas': 0.99}
Factual Knowledge	country_capital	Chile is to Santiago as Georgia is to	tbilisi	Atlanta	0.45	0	0	{'Atlanta': 0.45, '______': 0.05, '__': 0.05, ':': 0.02}	364	3.76701e-05	0.451134	0.996373	key	key|target	0.99	TRUE	TRUE	TRUE	target	{'tbilisi': 0.99}
Factual Knowledge	capital_world	Chile is to Santiago as Georgia is to	tbilisi	Atlanta	0.45	0	0	{'Atlanta': 0.45, '______': 0.05, '__': 0.05, ':': 0.02}	364	3.76701e-05	0.451134	0.996373	key	key|target	0.99	TRUE	TRUE	TRUE	target	{'tbilisi': 0.99}
Factual Knowledge	capital_world	Cyprus is to Nicosia as Norway is to	oslo	?	0.17	0	0	{'?': 0.07, 'what': 0.09, '______': 0.06, '': 0.03}	7	0.0252686	0.139771	0.99993	key	key|target	0.99	TRUE	TRUE	TRUE	target	{'oslo': 0.99}
Factual Knowledge	country_capital	Afghanistan is to Kabul as Norway is to	oslo	?	0.09	0	0	{'?': 0.09, 'what': 0.08, ':': 0.06}	6	0.0463867	0.0458984	0.99994	key	key|target	0.99	TRUE	TRUE	TRUE	target	{'oslo': 0.99}
Factual Knowledge	capital_world	Afghanistan is to Kabul as Norway is to	oslo	?	0.09	0	0	{'?': 0.09, 'what': 0.08, ':': 0.06}	6	0.0463867	0.0458984	0.99994	key	key|target	0.99	TRUE	TRUE	TRUE	target	{'oslo': 0.99}
Factual Knowledge	country_capital	Beirut is to Lebanon as Dublin is to	ireland	Ireland	0.92	1	1	{'Ireland': 0.92, 'the': 0.02, '______': 0.01, '__': 0.01, 'E': 0.0}	0	0.921875	0	1	key	key|target	0.98	TRUE	TRUE	TRUE	target	{'ireland': 0.98}
Factual Knowledge	capital_world	Beirut is to Lebanon as Dublin is to	ireland	Ireland	0.92	1	1	{'Ireland': 0.92, 'the': 0.02, '______': 0.01, '__': 0.01, 'E': 0.0}	0	0.921875	0	1	key	key|target	0.98	TRUE	TRUE	TRUE	target	{'ireland': 0.98}
Factual Knowledge	capital_world	Suva is to Fiji as Tegucigalpa is to	honduras	Honduras	0.91	1	1	{'Honduras': 0.91, 'what': 0.01, '______': 0.01, '__': 0.01, '': 0.01}	0	0.90625	0	1	key	key|target	0.98	TRUE	TRUE	TRUE	target	{'honduras': 0.98}
Factual Knowledge	capital_world	Baku is to Azerbaijan as Bern is to	switzerland	Switzerland	0.89	1	1	{'Switzerland': 0.89, 'what': 0.01, '__': 0.01, '______': 0.01, 'which': 0.01}	0	0.890625	0	1	key	key|target	0.98	TRUE	TRUE	TRUE	target	{'switzerland': 0.98}
Factual Knowledge	country_capital	Islamabad is to Pakistan as Lisbon is to	portugal	Portugal	0.86	1	1	{'Portugal': 0.86, 'what': 0.02, '______': 0.02, '__': 0.01, 'which': 0.01}	0	0.863281	0	1	key	key|target	0.98	TRUE	TRUE	TRUE	target	{'portugal': 0.98}
Factual Knowledge	capital_world	Islamabad is to Pakistan as Lisbon is to	portugal	Portugal	0.86	1	1	{'Portugal': 0.86, 'what': 0.02, '______': 0.02, '__': 0.01, 'which': 0.01}	0	0.863281	0	1	key	key|target	0.98	TRUE	TRUE	TRUE	target	{'portugal': 0.98}
Factual Knowledge	capital_world	Tallinn is to Estonia as Tegucigalpa is to	honduras	Honduras	0.84	1	1	{'Honduras': 0.84, 'what': 0.03, '______': 0.02, '__': 0.02, '': 0.01}	0	0.84375	0	1	key	key|target	0.98	TRUE	TRUE	TRUE	target	{'honduras': 0.98}
Factual Knowledge	capital_world	Skopje is to Macedonia as Tegucigalpa is to	honduras	Honduras	0.84	1	1	{'Honduras': 0.84, 'what': 0.02, '______': 0.02, '__': 0.02, '': 0.02}	0	0.835938	0	1	key	key|target	0.98	TRUE	TRUE	TRUE	target	{'honduras': 0.98}
Factual Knowledge	capital_world	Helsinki is to Finland as Bern is to	switzerland	Switzerland	0.82	1	1	{'Switzerland': 0.82, 'what': 0.01, '______': 0.01, 'which': 0.01, '__': 0.01}	0	0.816406	0	1	key	key|target	0.98	TRUE	TRUE	TRUE	target	{'switzerland': 0.98}
Factual Knowledge	country_capital	Nairobi is to Kenya as Warsaw is to	poland	Poland	0.81	1	1	{'Poland': 0.81, '______': 0.03, '__': 0.01, '_____': 0.01, '': 0.01}	0	0.808594	0	1	key	key|target	0.98	TRUE	TRUE	TRUE	target	{'poland': 0.98}
Factual Knowledge	capital_world	Nairobi is to Kenya as Warsaw is to	poland	Poland	0.81	1	1	{'Poland': 0.81, '______': 0.03, '__': 0.01, '_____': 0.01, '': 0.01}	0	0.808594	0	1	key	key|target	0.98	TRUE	TRUE	TRUE	target	{'poland': 0.98}
Factual Knowledge	capital_world	Windhoek is to Namibia as Bratislava is to	slovakia	Slovakia	0.79	1	1	{'Slovakia': 0.79, 'what': 0.03, 'the': 0.03, 'which': 0.02, '__': 0.02}	0	0.792969	0	1	key	key|target	0.98	TRUE	TRUE	TRUE	target	{'slovakia': 0.98}
Factual Knowledge	capital_world	Canberra is to Australia as Cairo is to	egypt	Egypt	0.77	1	1	{'Egypt': 0.77, '__': 0.03, '______': 0.02, '?': 0.01, '_____': 0.01}	0	0.773438	0	1	key	key|target	0.98	TRUE	TRUE	TRUE	target	{'egypt': 0.98}
Factual Knowledge	capital_world	Antananarivo is to Madagascar as Bern is to	switzerland	Switzerland	0.76	1	1	{'Switzerland': 0.76, 'what': 0.02, 'which': 0.02, '__': 0.02, '______': 0.02}	0	0.757812	0	1	key	key|target	0.98	TRUE	TRUE	TRUE	target	{'switzerland': 0.98}
Factual Knowledge	capital_world	Caracas is to Venezuela as Lisbon is to	portugal	Portugal	0.75	1	1	{'Portugal': 0.75, '__': 0.04, '______': 0.04, 'what': 0.03, '_____': 0.02}	0	0.746094	0	1	key	key|target	0.98	TRUE	TRUE	TRUE	target	{'portugal': 0.98}
Factual Knowledge	country_capital	Helsinki is to Finland as Tehran is to	iran	Iran	0.73	1	1	{'Iran': 0.73, 'what': 0.03, '______': 0.02, '__': 0.02, 'Pers': 0.01}	0	0.734375	0	1	key	key|target	0.98	TRUE	TRUE	TRUE	target	{'iran': 0.98}
Factual Knowledge	capital_world	Helsinki is to Finland as Tehran is to	iran	Iran	0.73	1	1	{'Iran': 0.73, 'what': 0.03, '______': 0.02, '__': 0.02, 'Pers': 0.01}	0	0.734375	0	1	key	key|target	0.98	TRUE	TRUE	TRUE	target	{'iran': 0.98}
Factual Knowledge	capital_world	Baku is to Azerbaijan as Bratislava is to	slovakia	Slovakia	0.72	1	1	{'Slovakia': 0.72, 'the': 0.04, '______': 0.03, '__': 0.02, 'what': 0.02}	0	0.722656	0	1	key	key|target	0.98	TRUE	TRUE	TRUE	target	{'slovakia': 0.98}
Factual Knowledge	capital_world	Bangkok is to Thailand as Bratislava is to	slovakia	Slovakia	0.61	1	1	{'Slovakia': 0.61, 'what': 0.06, '______': 0.04, 'which': 0.03, 'the': 0.03}	0	0.605469	0	1	key	key|target	0.98	TRUE	TRUE	TRUE	target	{'slovakia': 0.98}
Factual Knowledge	capital_world	Kathmandu is to Nepal as Riga is to	latvia	Latvia	0.59	1	1	{'Latvia': 0.59, 'which': 0.05, 'what': 0.04, '______': 0.03, '?': 0.02}	0	0.589844	0	1	key	key|target	0.98	TRUE	TRUE	TRUE	target	{'latvia': 0.98}
Factual Knowledge	capital_world	Tallinn is to Estonia as Abuja is to	nigeria	Nigeria	0.59	1	1	{'Nigeria': 0.59, '______': 0.08, '__': 0.05, 'what': 0.03, '_____': 0.02}	0	0.589844	0	1	key	key|target	0.98	TRUE	TRUE	TRUE	target	{'nigeria': 0.98}
Factual Knowledge	capital_world	Islamabad is to Pakistan as Nassau is to	bahamas	the	0.58	0	1	{'the': 0.58, 'The': 0.16, 'Bahamas': 0.05, '______': 0.02, '__': 0.02}	2	0.0493164	0.532715	0.99998	key	key|target	0.98	TRUE	TRUE	TRUE	target	{'bahamas': 0.98}
Factual Knowledge	capital_world	Harare is to Zimbabwe as Nassau is to	bahamas	the	0.57	0	1	{'the': 0.57, 'The': 0.18, '__': 0.03, 'Bahamas': 0.03, '___': 0.02}	3	0.032959	0.533447	0.99997	key	key|target	0.98	TRUE	TRUE	TRUE	target	{'bahamas': 0.98}
Factual Knowledge	capital_world	Tbilisi is to Georgia as Valletta is to	malta	Malta	0.56	1	1	{'Malta': 0.56, 'which': 0.09, '______': 0.03, ':': 0.03, 'what': 0.03}	0	0.5625	0	1	key	key|target	0.98	TRUE	TRUE	TRUE	target	{'malta': 0.98}
Factual Knowledge	capital_world	Chile is to Santiago as Greece is to	athens	Athens	0.56	1	1	{'Athens': 0.56, '______': 0.05, '__': 0.04, ':': 0.02}	0	0.558594	0	1	key	key|target	0.98	TRUE	TRUE	TRUE	target	{'athens': 0.98}
Factual Knowledge	capital_world	Stockholm is to Sweden as Amman is to	jordan	Jordan	0.53	1	1	{'Jordan': 0.53, 'what': 0.14, '__': 0.05, '______': 0.04, '___': 0.03}	0	0.527344	0	1	key	key|target	0.98	TRUE	TRUE	TRUE	target	{'jordan': 0.98}
Factual Knowledge	capital_world	Kathmandu is to Nepal as Monrovia is to	liberia	Liberia	0.51	1	1	{'Liberia': 0.51, '__': 0.06, 'what': 0.05, '______': 0.04, '____': 0.03}	0	0.507812	0	1	key	key|target	0.98	TRUE	TRUE	TRUE	target	{'liberia': 0.98}
Factual Knowledge	capital_world	Santiago is to Chile as Tunis is to	tunisia	Tunisia	0.51	1	1	{'Tunisia': 0.51, '______': 0.06, '__': 0.06, 'what': 0.05, '____': 0.03}	0	0.507812	0	1	key	key|target	0.98	TRUE	TRUE	TRUE	target	{'tunisia': 0.98}
Factual Knowledge	capital_world	Ljubljana is to Slovenia as Muscat is to	oman	Oman	0.5	1	1	{'Oman': 0.5, 'which': 0.05, 'what': 0.05, '__': 0.04, '_____': 0.03}	0	0.5	0	1	key	key|target	0.98	TRUE	TRUE	TRUE	target	{'oman': 0.98}
Factual Knowledge	country_capital	Islamabad is to Pakistan as Taipei is to	taiwan	Taiwan	0.46	1	1	{'Taiwan': 0.46, 'China': 0.08, '______': 0.05, 'the': 0.05, '__': 0.05}	0	0.462891	0	1	key	key|target	0.98	TRUE	TRUE	TRUE	target	{'taiwan': 0.98}
Factual Knowledge	capital_world	Stockholm is to Sweden as Athens is to	greece	Greece	0.46	1	1	{'Greece': 0.46, '__': 0.06, 'what': 0.05, '______': 0.05, ':': 0.05}	0	0.464844	0	1	key	key|target	0.98	TRUE	TRUE	TRUE	target	{'greece': 0.98}
Factual Knowledge	capital_world	Doha is to Qatar as Lisbon is to	portugal	Portugal	0.46	1	1	{'Portugal': 0.46, 'what': 0.07, ':': 0.07, '______': 0.05, '?': 0.04}	0	0.460938	0	1	key	key|target	0.98	TRUE	TRUE	TRUE	target	{'portugal': 0.98}
Factual Knowledge	capital_world	Kabul is to Afghanistan as Nicosia is to	cyprus	Cyprus	0.42	1	1	{'Cyprus': 0.42, 'which': 0.12, 'what': 0.09, '__': 0.05, '______': 0.03}	0	0.421875	0	1	key	key|target	0.98	TRUE	TRUE	TRUE	target	{'cyprus': 0.98}
Factual Knowledge	capital_world	Nairobi is to Kenya as Yerevan is to	armenia	Armenia	0.39	1	1	{'Armenia': 0.39, 'what': 0.06, '__': 0.05, 'which': 0.05, '______': 0.04}	0	0.388672	0	1	key	key|target	0.98	TRUE	TRUE	TRUE	target	{'armenia': 0.98}
Factual Knowledge	capital_world	Madagascar is to Antananarivo as Syria is to	damascus	Damascus	0.39	1	1	{'Damascus': 0.39, '__': 0.11, '______': 0.09, '____': 0.03, '_____': 0.02}	0	0.386719	0	1	key	key|target	0.98	TRUE	TRUE	TRUE	target	{'damascus': 0.98}
Factual Knowledge	capital_world	Nairobi is to Kenya as Rabat is to	morocco	Morocco	0.38	1	1	{'Morocco': 0.38, 'what': 0.06, '______': 0.05, '__': 0.05, '___': 0.04}	0	0.380859	0	1	key	key|target	0.98	TRUE	TRUE	TRUE	target	{'morocco': 0.98}
Factual Knowledge	country_capital	Santiago is to Chile as Sofia is to	bulgaria	Bulgaria	0.28	1	1	{'Bulgaria': 0.28, 'what': 0.12, '______': 0.08, '__': 0.05, '____': 0.05}	0	0.277344	0	1	key	key|target	0.98	TRUE	TRUE	TRUE	target	{'bulgaria': 0.98}
Factual Knowledge	capital_world	Santiago is to Chile as Sofia is to	bulgaria	Bulgaria	0.28	1	1	{'Bulgaria': 0.28, 'what': 0.12, '______': 0.08, '__': 0.05, '____': 0.05}	0	0.277344	0	1	key	key|target	0.98	TRUE	TRUE	TRUE	target	{'bulgaria': 0.98}
Factual Knowledge	capital_world	Eritrea is to Asmara as China is to	beijing	Beijing	0.21	1	1	{'Beijing': 0.21, '?': 0.04, '______': 0.08, '': 0.03}	0	0.208008	0	1	key	key|target	0.98	TRUE	TRUE	TRUE	target	{'beijing': 0.98}
Factual Knowledge	capital_world	Thimphu is to Bhutan as Ankara is to	turkey	Turkey	0.2	1	1	{'Turkey': 0.2, 'what': 0.17, '______': 0.12, 'which': 0.1, '__': 0.08}	0	0.196289	0	1	key	key|target	0.98	TRUE	TRUE	TRUE	target	{'turkey': 0.98}
Factual Knowledge	country_capital	Bangladesh is to Dhaka as Norway is to	oslo	?	0.19	0	1	{'?': 0.19, '______': 0.1, 'Oslo': 0.08, '__': 0.06, ':': 0.05}	2	0.0805664	0.112793	0.99998	key	key|target	0.98	TRUE	TRUE	TRUE	target	{'oslo': 0.98}
Factual Knowledge	capital_world	Manila is to Philippines as Nassau is to	bahamas	Bahamas	0.19	1	1	{'Bahamas': 0.19, 'the': 0.17, 'The': 0.07, '__': 0.06, '______': 0.05}	0	0.185547	0	1	key	key|target	0.98	TRUE	TRUE	TRUE	target	{'bahamas': 0.98}
Factual Knowledge	country_capital	Indonesia is to Jakarta as Norway is to	oslo	Oslo	0.18	1	1	{'Oslo': 0.18, '______': 0.09, '?': 0.06, '__': 0.05, 'A': 0.05}	0	0.177734	0	1	key	key|target	0.98	TRUE	TRUE	TRUE	target	{'oslo': 0.98}
Factual Knowledge	capital_world	Indonesia is to Jakarta as Norway is to	oslo	Oslo	0.18	1	1	{'Oslo': 0.18, '______': 0.09, '?': 0.06, '__': 0.05, 'A': 0.05}	0	0.177734	0	1	key	key|target	0.98	TRUE	TRUE	TRUE	target	{'oslo': 0.98}
Factual Knowledge	capital_world	Apia is to Samoa as Dushanbe is to	tajikistan	Taj	0.81	0.5	0.5	{'Taj': 0.81, 'what': 0.02, 'T': 0.02, '?': 0.01, 'which': 0.01}	0	0.808594	0	1	key	key|target	0.98	TRUE	TRUE	TRUE	target	{'tajikistan': 0.98}
Factual Knowledge	capital_world	Nepal is to Kathmandu as Latvia is to	riga	R	0.32	0.5	0.5	{'R': 0.32, '______': 0.06, '__': 0.04, ':': 0.03, '"': 0.02}	123	0.000583649	0.319729	0.998774	key	key|target	0.98	TRUE	TRUE	TRUE	target	{'riga': 0.98}
Factual Knowledge	capital_world	Lithuania is to Vilnius as Turkmenistan is to	ashgabat	Ash	0.28	0.5	0.5	{'Ash': 0.28, '__': 0.06, ':"': 0.04, 'A': 0.04, 'what': 0.03}	0	0.279297	0	1	key	key|target	0.98	TRUE	TRUE	TRUE	target	{'ashgabat': 0.98}
Factual Knowledge	capital_world	Tallinn is to Estonia as Banjul is to	gambia	G	0.24	0.5	0.5	{'G': 0.24, 'The': 0.17, 'the': 0.15, 'what': 0.05, '?': 0.04}	56	0.000759125	0.235569	0.999442	key	key|target	0.98	TRUE	TRUE	TRUE	target	{'gambia': 0.98}
Factual Knowledge	capital_world	Chile is to Santiago as Nigeria is to	abuja	Abu	0.21	0.5	0.5	{'Abu': 0.21, '______': 0.11, '_____': 0.1, 'Lagos': 0.08, '____': 0.08}	0	0.208984	0	1	key	key|target	0.98	TRUE	TRUE	TRUE	target	{'abuja': 0.98}
Factual Knowledge	capital_world	Madagascar is to Antananarivo as Belize is to	belmopan	Bel	0.17	0.5	0.5	{'Bel': 0.17, '______': 0.14, '__': 0.12, 'Belize': 0.05, ':': 0.05}	0	0.173828	0	1	key	key|target	0.98	TRUE	TRUE	TRUE	target	{'belmopan': 0.98}
Factual Knowledge	capital_world	Algeria is to Algiers as Jordan is to	amman	?	0.15	0	0.5	{'?': 0.08, 'what': 0.09, 'Am': 0.07, '': 0.03}	3	0.0678711	0.0844727	0.99997	key	key|target	0.98	TRUE	TRUE	TRUE	target	{'amman': 0.98}
Factual Knowledge	capital_world	Chile is to Santiago as Estonia is to	tallinn	Tall	0.14	0.5	0.5	{'Tall': 0.14, '______': 0.09, ':': 0.09, '____': 0.05, '__': 0.05}	0	0.137695	0	1	key	key|target	0.98	TRUE	TRUE	TRUE	target	{'tallinn': 0.98}
Factual Knowledge	country_capital	Jakarta is to Indonesia as Kingston is to	jamaica	Jamaica	0.96	1	1	{'Jamaica': 0.96, '__': 0.0, 'what': 0.0, '______': 0.0, 'the': 0.0}	0	0.957031	0	1	key	key|target	0.97	TRUE	TRUE	TRUE	target	{'jamaica': 0.97}
Factual Knowledge	capital_world	Jakarta is to Indonesia as Kingston is to	jamaica	Jamaica	0.96	1	1	{'Jamaica': 0.96, '__': 0.0, 'what': 0.0, '______': 0.0, 'the': 0.0}	0	0.957031	0	1	key	key|target	0.97	TRUE	TRUE	TRUE	target	{'jamaica': 0.97}
Factual Knowledge	capital_world	Warsaw is to Poland as Athens is to	greece	Greece	0.95	1	1	{'Greece': 0.95, '______': 0.0, 'the': 0.0, '__': 0.0, '': 0.0}	0	0.949219	0	1	key	key|target	0.97	TRUE	TRUE	TRUE	target	{'greece': 0.97}
Factual Knowledge	capital_world	Vilnius is to Lithuania as Canberra is to	australia	Australia	0.92	1	1	{'Australia': 0.92, '______': 0.01, '__': 0.01, '': 0.01, 'what': 0.0}	0	0.921875	0	1	key	key|target	0.97	TRUE	TRUE	TRUE	target	{'australia': 0.97}
Factual Knowledge	capital_world	Tbilisi is to Georgia as Bern is to	switzerland	Switzerland	0.89	1	1	{'Switzerland': 0.89, 'which': 0.01, 'what': 0.01, '__': 0.01, '______': 0.01}	0	0.894531	0	1	key	key|target	0.97	TRUE	TRUE	TRUE	target	{'switzerland': 0.97}
Factual Knowledge	capital_world	Baku is to Azerbaijan as Budapest is to	hungary	Hungary	0.88	1	1	{'Hungary': 0.88, '______': 0.02, '__': 0.01, 'what': 0.01, 'Budapest': 0.01}	0	0.875	0	1	key	key|target	0.97	TRUE	TRUE	TRUE	target	{'hungary': 0.97}
Factual Knowledge	capital_world	Caracas is to Venezuela as Dublin is to	ireland	Ireland	0.87	1	1	{'Ireland': 0.87, 'the': 0.03, '______': 0.02, '__': 0.01, 'what': 0.01}	0	0.871094	0	1	key	key|target	0.97	TRUE	TRUE	TRUE	target	{'ireland': 0.97}
Factual Knowledge	country_capital	Beirut is to Lebanon as Bucharest is to	romania	Romania	0.86	1	1	{'Romania': 0.86, '______': 0.02, 'what': 0.01, '__': 0.01, 'which': 0.01}	0	0.863281	0	1	key	key|target	0.97	TRUE	TRUE	TRUE	target	{'romania': 0.97}
Factual Knowledge	capital_world	Antananarivo is to Madagascar as Canberra is to	australia	Australia	0.86	1	1	{'Australia': 0.86, '__': 0.02, '______': 0.02, 'what': 0.01, 'which': 0.01}	0	0.859375	0	1	key	key|target	0.97	TRUE	TRUE	TRUE	target	{'australia': 0.97}
Factual Knowledge	capital_world	Beirut is to Lebanon as Bucharest is to	romania	Romania	0.86	1	1	{'Romania': 0.86, '______': 0.02, 'what': 0.01, '__': 0.01, 'which': 0.01}	0	0.863281	0	1	key	key|target	0.97	TRUE	TRUE	TRUE	target	{'romania': 0.97}
Factual Knowledge	capital_world	Jakarta is to Indonesia as Mogadishu is to	somalia	Somalia	0.83	1	1	{'Somalia': 0.83, 'Som': 0.02, 'what': 0.02, '______': 0.02, '__': 0.01}	0	0.828125	0	1	key	key|target	0.97	TRUE	TRUE	TRUE	target	{'somalia': 0.97}
Factual Knowledge	capital_world	Kabul is to Afghanistan as Baghdad is to	iraq	Iraq	0.71	1	1	{'Iraq': 0.71, 'what': 0.04, '______': 0.04, '__': 0.03, '_____': 0.01}	0	0.707031	0	1	key	key|target	0.97	TRUE	TRUE	TRUE	target	{'iraq': 0.97}
Factual Knowledge	capital_world	Quito is to Ecuador as Vienna is to	austria	Austria	0.67	1	1	{'Austria': 0.67, '______': 0.05, '__': 0.04, 'what': 0.03, '_____': 0.02}	0	0.671875	0	1	key	key|target	0.97	TRUE	TRUE	TRUE	target	{'austria': 0.97}
Factual Knowledge	country_capital	Helsinki is to Finland as Islamabad is to	pakistan	Pakistan	0.66	1	1	{'Pakistan': 0.66, '______': 0.07, '__': 0.04, '_____': 0.02, '____': 0.02}	0	0.660156	0	1	key	key|target	0.97	TRUE	TRUE	TRUE	target	{'pakistan': 0.97}
Factual Knowledge	capital_world	Helsinki is to Finland as Islamabad is to	pakistan	Pakistan	0.66	1	1	{'Pakistan': 0.66, '______': 0.07, '__': 0.04, '_____': 0.02, '____': 0.02}	0	0.660156	0	1	key	key|target	0.97	TRUE	TRUE	TRUE	target	{'pakistan': 0.97}
Factual Knowledge	capital_world	Quito is to Ecuador as Tripoli is to	libya	Libya	0.64	1	1	{'Libya': 0.64, '___': 0.04, 'what': 0.04, ':': 0.02, '__': 0.02}	0	0.644531	0	1	key	key|target	0.97	TRUE	TRUE	TRUE	target	{'libya': 0.97}
Factual Knowledge	capital_world	Quito is to Ecuador as Tunis is to	tunisia	Tunisia	0.61	1	1	{'Tunisia': 0.61, '__': 0.05, 'what': 0.04, '______': 0.03, '___': 0.03}	0	0.605469	0	1	key	key|target	0.97	TRUE	TRUE	TRUE	target	{'tunisia': 0.97}
Factual Knowledge	country_capital	Dhaka is to Bangladesh as Tehran is to	iran	Iran	0.6	1	1	{'Iran': 0.6, '______': 0.05, 'what': 0.04, '__': 0.04, ':': 0.02}	0	0.601562	0	1	key	key|target	0.97	TRUE	TRUE	TRUE	target	{'iran': 0.97}
Factual Knowledge	country_capital	Ukraine is to Kiev as England is to	london	London	0.58	1	1	{'London': 0.58, '______': 0.09, '__': 0.04, '': 0.02, ':': 0.02}	0	0.582031	0	1	key	key|target	0.97	TRUE	TRUE	TRUE	target	{'london': 0.97}
Factual Knowledge	capital_world	Ukraine is to Kiev as England is to	london	London	0.58	1	1	{'London': 0.58, '______': 0.09, '__': 0.04, '': 0.02, ':': 0.02}	0	0.582031	0	1	key	key|target	0.97	TRUE	TRUE	TRUE	target	{'london': 0.97}
Factual Knowledge	capital_world	Thimphu is to Bhutan as Tripoli is to	libya	Libya	0.57	1	1	{'Libya': 0.57, 'what': 0.08, ':': 0.05, '___': 0.03, 'which': 0.02}	0	0.574219	0	1	key	key|target	0.97	TRUE	TRUE	TRUE	target	{'libya': 0.97}
Factual Knowledge	capital_world	Ljubljana is to Slovenia as Taipei is to	taiwan	Taiwan	0.55	1	1	{'Taiwan': 0.55, '__': 0.05, '______': 0.04, 'the': 0.02, '?': 0.02}	0	0.546875	0	1	key	key|target	0.97	TRUE	TRUE	TRUE	target	{'taiwan': 0.97}
Factual Knowledge	country_capital	Ukraine is to Kiev as Norway is to	oslo	Oslo	0.52	1	1	{'Oslo': 0.52, '______': 0.06, '__': 0.03, ':': 0.03, '____': 0.03}	0	0.515625	0	1	key	key|target	0.97	TRUE	TRUE	TRUE	target	{'oslo': 0.97}
Factual Knowledge	capital_world	Montevideo is to Uruguay as Tripoli is to	libya	Libya	0.52	1	1	{'Libya': 0.52, 'what': 0.05, ':': 0.05, '___': 0.03, '': 0.02}	0	0.515625	0	1	key	key|target	0.97	TRUE	TRUE	TRUE	target	{'libya': 0.97}
Factual Knowledge	capital_world	Ukraine is to Kiev as Norway is to	oslo	Oslo	0.52	1	1	{'Oslo': 0.52, '______': 0.06, '__': 0.03, ':': 0.03, '____': 0.03}	0	0.515625	0	1	key	key|target	0.97	TRUE	TRUE	TRUE	target	{'oslo': 0.97}
Factual Knowledge	capital_world	Jakarta is to Indonesia as Kampala is to	uganda	Uganda	0.47	1	1	{'Uganda': 0.47, 'what': 0.11, '______': 0.04, '__': 0.04, 'which': 0.04}	0	0.46875	0	1	key	key|target	0.97	TRUE	TRUE	TRUE	target	{'uganda': 0.97}
Factual Knowledge	capital_world	Islamabad is to Pakistan as Hanoi is to	vietnam	Vietnam	0.46	1	1	{'Vietnam': 0.46, '______': 0.11, '_____': 0.04, '__': 0.04, '____': 0.03}	0	0.462891	0	1	key	key|target	0.97	TRUE	TRUE	TRUE	target	{'vietnam': 0.97}
Factual Knowledge	capital_world	Kathmandu is to Nepal as Muscat is to	oman	Oman	0.39	1	1	{'Oman': 0.39, '______': 0.05, 'which': 0.05, '_____': 0.05, '__': 0.05}	0	0.392578	0	1	key	key|target	0.97	TRUE	TRUE	TRUE	target	{'oman': 0.97}
Factual Knowledge	capital_world	Madagascar is to Antananarivo as Hungary is to	budapest	Budapest	0.39	1	1	{'Budapest': 0.39, '______': 0.1, '__': 0.07, 'B': 0.04, '____': 0.02}	0	0.386719	0	1	key	key|target	0.97	TRUE	TRUE	TRUE	target	{'budapest': 0.97}
Factual Knowledge	capital_world	Santiago is to Chile as Tallinn is to	estonia	Estonia	0.36	1	1	{'Estonia': 0.36, 'what': 0.12, 'which': 0.06, '__': 0.04, ':': 0.04}	0	0.355469	0	1	key	key|target	0.97	TRUE	TRUE	TRUE	target	{'estonia': 0.97}
Factual Knowledge	capital_world	Stockholm is to Sweden as Tirana is to	albania	Albania	0.33	1	1	{'Albania': 0.33, 'what': 0.11, '______': 0.07, '__': 0.06, '?': 0.05}	0	0.333984	0	1	key	key|target	0.97	TRUE	TRUE	TRUE	target	{'albania': 0.97}
Factual Knowledge	capital_world	Stockholm is to Sweden as Astana is to	kazakhstan	Kazakhstan	0.33	1	1	{'Kazakhstan': 0.33, 'what': 0.07, '______': 0.06, '__': 0.05, 'which': 0.04}	0	0.333984	0	1	key	key|target	0.97	TRUE	TRUE	TRUE	target	{'kazakhstan': 0.97}
Factual Knowledge	capital_world	Mozambique is to Maputo as Norway is to	oslo	Oslo	0.32	1	1	{'Oslo': 0.32, '______': 0.06, '__': 0.04, '': 0.03, ':': 0.03}	0	0.322266	0	1	key	key|target	0.97	TRUE	TRUE	TRUE	target	{'oslo': 0.97}
Factual Knowledge	capital_world	Santiago is to Chile as Abuja is to	nigeria	Nigeria	0.31	1	1	{'Nigeria': 0.31, '______': 0.13, '__': 0.09, '___': 0.06, '____': 0.05}	0	0.308594	0	1	key	key|target	0.97	TRUE	TRUE	TRUE	target	{'nigeria': 0.97}
Factual Knowledge	country_capital	Budapest is to Hungary as Lima is to	peru	Peru	0.21	1	1	{'Peru': 0.21, '______': 0.1, 'what': 0.1, '___': 0.05, '__': 0.05}	0	0.208008	0	1	key	key|target	0.97	TRUE	TRUE	TRUE	target	{'peru': 0.97}
Factual Knowledge	country_capital	Indonesia is to Jakarta as England is to	london	London	0.21	1	1	{'London': 0.21, '______': 0.07, ':': 0.07, 'England': 0.05, '__': 0.05}	0	0.211914	0	1	key	key|target	0.97	TRUE	TRUE	TRUE	target	{'london': 0.97}
Factual Knowledge	capital_world	Budapest is to Hungary as Lima is to	peru	Peru	0.21	1	1	{'Peru': 0.21, '______': 0.1, 'what': 0.1, '___': 0.05, '__': 0.05}	0	0.208008	0	1	key	key|target	0.97	TRUE	TRUE	TRUE	target	{'peru': 0.97}
Factual Knowledge	capital_world	Indonesia is to Jakarta as England is to	london	London	0.21	1	1	{'London': 0.21, '______': 0.07, ':': 0.07, 'England': 0.05, '__': 0.05}	0	0.211914	0	1	key	key|target	0.97	TRUE	TRUE	TRUE	target	{'london': 0.97}
Factual Knowledge	capital_world	Vilnius is to Lithuania as Ankara is to	turkey	Turkey	0.2	1	1	{'Turkey': 0.2, 'what': 0.15, 'which': 0.09, '______': 0.08, '__': 0.07}	0	0.198242	0	1	key	key|target	0.97	TRUE	TRUE	TRUE	target	{'turkey': 0.97}
Factual Knowledge	country_capital	Australia is to Canberra as Philippines is to	manila	______	0.17	0	1	{'______': 0.17, 'Manila': 0.09, '__': 0.06, '____': 0.05, '?': 0.04}	1	0.0932617	0.081543	0.99999	key	key|target	0.97	TRUE	TRUE	TRUE	target	{'manila': 0.97}
Factual Knowledge	capital_world	Australia is to Canberra as Philippines is to	manila	______	0.17	0	1	{'______': 0.17, 'Manila': 0.09, '__': 0.06, '____': 0.05, '?': 0.04}	1	0.0932617	0.081543	0.99999	key	key|target	0.97	TRUE	TRUE	TRUE	target	{'manila': 0.97}
Factual Knowledge	capital_world	Algeria is to Algiers as China is to	beijing	Beijing	0.14	1	1	{'Beijing': 0.14, '______': 0.07, '?': 0.04, ':': 0.04}	0	0.143555	0	1	key	key|target	0.97	TRUE	TRUE	TRUE	target	{'beijing': 0.97}
Factual Knowledge	country_language	Fiji is to English as Iran is to	persian	______	0.13	0	1	{'______': 0.13, '_____': 0.1, '___': 0.06, 'Persian': 0.05, '____': 0.05}	3	0.0522461	0.0805664	0.99997	key	key|target	0.97	TRUE	TRUE	TRUE	target	{'persian': 0.97}
Factual Knowledge	capital_world	Kabul is to Afghanistan as Muscat is to	oman	Oman	0.12	1	1	{'Oman': 0.12, '?': 0.08, 'which': 0.08, '__': 0.05, '_____': 0.05}	0	0.122559	0	1	key	key|target	0.97	TRUE	TRUE	TRUE	target	{'oman': 0.97}
Factual Knowledge	capital_world	Uzbekistan is to Tashkent as China is to	beijing	Beijing	0.12	1	1	{'Beijing': 0.12, '______': 0.06, ':': 0.04, '': 0.04, '?': 0.03}	0	0.121094	0	1	key	key|target	0.97	TRUE	TRUE	TRUE	target	{'beijing': 0.97}
Factual Knowledge	capital_world	Uzbekistan is to Tashkent as Tunisia is to	tunis	__	0.07	0	1	{'__': 0.07, 'what': 0.06, '"': 0.04, 'Tunis': 0.04, ':': 0.04}	4	0.041748	0.0314941	0.99996	key	key|target	0.97	TRUE	TRUE	TRUE	target	{'tunis': 0.97}
Factual Knowledge	capital_world	Ukraine is to Kiev as Rwanda is to	kigali	K	0.57	0.5	0.5	{'K': 0.57, '______': 0.06, '__': 0.03, '_____': 0.03, '____': 0.02}	241	8.91685e-05	0.566317	0.997598	key	key|target	0.97	TRUE	TRUE	TRUE	target	{'kigali': 0.97}
Factual Knowledge	capital_world	Bujumbura is to Burundi as Georgetown is to	guyana	what	0.44	0	0.5	{'what': 0.44, 'which': 0.2, 'Guy': 0.1, 'where': 0.04, '': 0.03}	2	0.104492	0.336914	0.99998	key	key|target	0.97	TRUE	TRUE	TRUE	target	{'guyana': 0.97}
Factual Knowledge	capital_world	Lithuania is to Vilnius as Azerbaijan is to	baku	B	0.32	0.5	0.5	{'B': 0.32, '?"': 0.06, '"': 0.05, 'what': 0.05, '__': 0.05}	94	0.000427246	0.321838	0.999063	key	key|target	0.97	TRUE	TRUE	TRUE	target	{'baku': 0.97}
Factual Knowledge	capital_world	Algiers is to Algeria as Asmara is to	eritrea	E	0.29	0.5	0.5	{'E': 0.29, 'what': 0.17, '?': 0.11, 'which': 0.1, '__': 0.03}	29	0.00308228	0.287933	0.999711	key	key|target	0.97	TRUE	TRUE	TRUE	target	{'eritrea': 0.97}
Factual Knowledge	capital_world	Suriname is to Paramaribo as Macedonia is to	skopje	Sk	0.29	0.5	0.5	{'Sk': 0.29, 'what': 0.06, ':': 0.06, '__': 0.06, '______': 0.05}	0	0.285156	0	1	key	key|target	0.97	TRUE	TRUE	TRUE	target	{'skopje': 0.97}
Factual Knowledge	capital_world	Azerbaijan is to Baku as Romania is to	bucharest	Buch	0.24	0.5	0.5	{'Buch': 0.24, ':': 0.05, '': 0.04}	0	0.240234	0	1	key	key|target	0.97	TRUE	TRUE	TRUE	target	{'bucharest': 0.97}
Factual Knowledge	capital_world	Warsaw is to Poland as Banjul is to	gambia	G	0.19	0.5	0.5	{'G': 0.19, 'The': 0.12, 'the': 0.11, 'what': 0.08, '?': 0.06}	98	0.000518799	0.189911	0.999023	key	key|target	0.97	TRUE	TRUE	TRUE	target	{'gambia': 0.97}
Factual Knowledge	capital_world	Lithuania is to Vilnius as Kazakhstan is to	astana	Ast	0.14	0.5	0.5	{'Ast': 0.14, 'Al': 0.13, 'A': 0.09, '__': 0.07, '______': 0.05}	0	0.144531	0	1	key	key|target	0.97	TRUE	TRUE	TRUE	target	{'astana': 0.97}
Factual Knowledge	capital_world	Madagascar is to Antananarivo as Eritrea is to	asmara	As	0.13	0.5	0.5	{'As': 0.13, '?': 0.09, '__': 0.09, '______': 0.06, 'what': 0.05}	0	0.126953	0	1	key	key|target	0.97	TRUE	TRUE	TRUE	target	{'asmara': 0.97}
Factual Knowledge	capital_world	Algeria is to Algiers as Romania is to	bucharest	what	0.08	0	0.5	{'what': 0.08, 'Buch': 0.07, ':': 0.05, '?': 0.05}	2	0.0664062	0.0185547	0.99998	key	key|target	0.97	TRUE	TRUE	TRUE	target	{'bucharest': 0.97}
Factual Knowledge	country_capital	France is to Paris as Georgia is to	tbilisi	Atlanta	0.4	0	0	{'Atlanta': 0.4, '__': 0.08, '______': 0.07, '?': 0.02, 'what': 0.02}	1243	6.4671e-06	0.396478	0.987614	key	key|target	0.97	TRUE	TRUE	TRUE	target	{'tbilisi': 0.97}
Factual Knowledge	capital_world	France is to Paris as Georgia is to	tbilisi	Atlanta	0.4	0	0	{'Atlanta': 0.4, '__': 0.08, '______': 0.07, '?': 0.02, 'what': 0.02}	1243	6.4671e-06	0.396478	0.987614	key	key|target	0.97	TRUE	TRUE	TRUE	target	{'tbilisi': 0.97}
Factual Knowledge	country_capital	Conakry is to Guinea as Lisbon is to	portugal	Portugal	0.94	1	1	{'Portugal': 0.94, '__': 0.01, '______': 0.0, '': 0.0, 'what': 0.0}	0	0.941406	0	1	key	key|target	0.96	TRUE	TRUE	TRUE	target	{'portugal': 0.96}
Factual Knowledge	capital_world	Apia is to Samoa as Copenhagen is to	denmark	Denmark	0.94	1	1	{'Denmark': 0.94, 'Scandin': 0.02, 'the': 0.01, 'Europe': 0.0, 'Sweden': 0.0}	0	0.9375	0	1	key	key|target	0.96	TRUE	TRUE	TRUE	target	{'denmark': 0.96}
Factual Knowledge	capital_world	Conakry is to Guinea as Lisbon is to	portugal	Portugal	0.94	1	1	{'Portugal': 0.94, '__': 0.01, '______': 0.0, '': 0.0, 'what': 0.0}	0	0.941406	0	1	key	key|target	0.96	TRUE	TRUE	TRUE	target	{'portugal': 0.96}
Factual Knowledge	capital_world	Roseau is to Dominica as Abuja is to	nigeria	Nigeria	0.91	1	1	{'Nigeria': 0.91, 'the': 0.01, '______': 0.01, 'what': 0.0, '__': 0.0}	0	0.914062	0	1	key	key|target	0.96	TRUE	TRUE	TRUE	target	{'nigeria': 0.96}
Factual Knowledge	capital_world	Apia is to Samoa as Bucharest is to	romania	Romania	0.91	1	1	{'Romania': 0.91, 'Trans': 0.03, 'R': 0.01, 'the': 0.01, '': 0.0}	0	0.90625	0	1	key	key|target	0.96	TRUE	TRUE	TRUE	target	{'romania': 0.96}
Factual Knowledge	capital_world	Helsinki is to Finland as Cairo is to	egypt	Egypt	0.91	1	1	{'Egypt': 0.91, '______': 0.01, '__': 0.01, 'what': 0.0, 'Eq': 0.0}	0	0.914062	0	1	key	key|target	0.96	TRUE	TRUE	TRUE	target	{'egypt': 0.96}
Factual Knowledge	capital_world	Tbilisi is to Georgia as Tegucigalpa is to	honduras	Honduras	0.86	1	1	{'Honduras': 0.86, 'what': 0.02, '______': 0.02, '__': 0.02, '': 0.01}	0	0.863281	0	1	key	key|target	0.96	TRUE	TRUE	TRUE	target	{'honduras': 0.96}
Factual Knowledge	capital_world	Managua is to Nicaragua as Tegucigalpa is to	honduras	Honduras	0.83	1	1	{'Honduras': 0.83, 'what': 0.04, '______': 0.02, '__': 0.02, 'which': 0.01}	0	0.828125	0	1	key	key|target	0.96	TRUE	TRUE	TRUE	target	{'honduras': 0.96}
Factual Knowledge	capital_world	Paris is to France as Havana is to	cuba	Cuba	0.82	1	1	{'Cuba': 0.82, '______': 0.02, 'what': 0.02, '': 0.01, '__': 0.01}	0	0.816406	0	1	key	key|target	0.96	TRUE	TRUE	TRUE	target	{'cuba': 0.96}
Factual Knowledge	capital_world	Jakarta is to Indonesia as Montevideo is to	uruguay	Uruguay	0.78	1	1	{'Uruguay': 0.78, 'what': 0.09, 'which': 0.02, '______': 0.01, '__': 0.01}	0	0.777344	0	1	key	key|target	0.96	TRUE	TRUE	TRUE	target	{'uruguay': 0.96}
Factual Knowledge	country_capital	Iraq is to Baghdad as Denmark is to	copenhagen	Copenhagen	0.76	1	1	{'Copenhagen': 0.76, 'Denmark': 0.02, ':': 0.02, 'A': 0.01, 'what': 0.01}	0	0.761719	0	1	key	key|target	0.96	TRUE	TRUE	TRUE	target	{'copenhagen': 0.96}
Factual Knowledge	capital_world	Tbilisi is to Georgia as Tunis is to	tunisia	Tunisia	0.76	1	1	{'Tunisia': 0.76, '__': 0.03, '______': 0.03, 'what': 0.02, '_____': 0.01}	0	0.761719	0	1	key	key|target	0.96	TRUE	TRUE	TRUE	target	{'tunisia': 0.96}
Factual Knowledge	capital_world	Iraq is to Baghdad as Denmark is to	copenhagen	Copenhagen	0.76	1	1	{'Copenhagen': 0.76, 'Denmark': 0.02, ':': 0.02, 'A': 0.01, 'what': 0.01}	0	0.761719	0	1	key	key|target	0.96	TRUE	TRUE	TRUE	target	{'copenhagen': 0.96}
Factual Knowledge	capital_world	Baku is to Azerbaijan as Hanoi is to	vietnam	Vietnam	0.74	1	1	{'Vietnam': 0.74, 'Viet': 0.08, '______': 0.04, '__': 0.02, '_____': 0.01}	0	0.742188	0	1	key	key|target	0.96	TRUE	TRUE	TRUE	target	{'vietnam': 0.96}
Factual Knowledge	capital_world	Ottawa is to Canada as Madrid is to	spain	Spain	0.73	1	1	{'Spain': 0.73, '______': 0.05, '_____': 0.03, '____': 0.02, 'what': 0.02}	0	0.734375	0	1	key	key|target	0.96	TRUE	TRUE	TRUE	target	{'spain': 0.96}
Factual Knowledge	country_capital	Kabul is to Afghanistan as Ottawa is to	canada	Canada	0.72	1	1	{'Canada': 0.72, '__': 0.06, '______': 0.04, '____': 0.01, '_____': 0.01}	0	0.71875	0	1	key	key|target	0.96	TRUE	TRUE	TRUE	target	{'canada': 0.96}
Factual Knowledge	capital_world	Kabul is to Afghanistan as Ottawa is to	canada	Canada	0.72	1	1	{'Canada': 0.72, '__': 0.06, '______': 0.04, '____': 0.01, '_____': 0.01}	0	0.71875	0	1	key	key|target	0.96	TRUE	TRUE	TRUE	target	{'canada': 0.96}
Factual Knowledge	capital_world	Lithuania is to Vilnius as Denmark is to	copenhagen	Copenhagen	0.71	1	1	{'Copenhagen': 0.71, 'what': 0.02, '______': 0.02, '__': 0.02, 'A': 0.02}	0	0.710938	0	1	key	key|target	0.96	TRUE	TRUE	TRUE	target	{'copenhagen': 0.96}
Factual Knowledge	country_capital	Belgrade is to Serbia as Lima is to	peru	Peru	0.7	1	1	{'Peru': 0.7, '______': 0.05, '__': 0.03, 'what': 0.02, '_____': 0.01}	0	0.699219	0	1	key	key|target	0.96	TRUE	TRUE	TRUE	target	{'peru': 0.96}
Factual Knowledge	country_capital	Conakry is to Guinea as Taipei is to	taiwan	Taiwan	0.69	1	1	{'Taiwan': 0.69, '__': 0.04, 'the': 0.04, '______': 0.03, 'China': 0.02}	0	0.6875	0	1	key	key|target	0.96	TRUE	TRUE	TRUE	target	{'taiwan': 0.96}
Factual Knowledge	country_capital	Abuja is to Nigeria as Lima is to	peru	Peru	0.67	1	1	{'Peru': 0.67, 'what': 0.05, '______': 0.04, '__': 0.03, ':': 0.02}	0	0.667969	0	1	key	key|target	0.96	TRUE	TRUE	TRUE	target	{'peru': 0.96}
Factual Knowledge	capital_world	Dakar is to Senegal as Lisbon is to	portugal	Portugal	0.67	1	1	{'Portugal': 0.67, '______': 0.04, ':': 0.04, '__': 0.03, 'what': 0.03}	0	0.671875	0	1	key	key|target	0.96	TRUE	TRUE	TRUE	target	{'portugal': 0.96}
Factual Knowledge	capital_world	Jakarta is to Indonesia as Quito is to	ecuador	Ecuador	0.65	1	1	{'Ecuador': 0.65, 'what': 0.09, '__': 0.05, '______': 0.04, '?': 0.02}	0	0.648438	0	1	key	key|target	0.96	TRUE	TRUE	TRUE	target	{'ecuador': 0.96}
Factual Knowledge	capital_world	Nairobi is to Kenya as Quito is to	ecuador	Ecuador	0.6	1	1	{'Ecuador': 0.6, '______': 0.08, '__': 0.06, 'what': 0.04, '_____': 0.02}	0	0.601562	0	1	key	key|target	0.96	TRUE	TRUE	TRUE	target	{'ecuador': 0.96}
Factual Knowledge	capital_world	Ottawa is to Canada as Cairo is to	egypt	Egypt	0.6	1	1	{'Egypt': 0.6, '______': 0.05, '__': 0.03, 'what': 0.03, '_____': 0.03}	0	0.597656	0	1	key	key|target	0.96	TRUE	TRUE	TRUE	target	{'egypt': 0.96}
Factual Knowledge	capital_world	Somalia is to Mogadishu as Iran is to	tehran	Tehran	0.56	1	1	{'Tehran': 0.56, '__': 0.06, '______': 0.04, 'Te': 0.03, '?': 0.02}	0	0.558594	0	1	key	key|target	0.96	TRUE	TRUE	TRUE	target	{'tehran': 0.96}
Factual Knowledge	capital_world	Tallinn is to Estonia as Valletta is to	malta	Malta	0.51	1	1	{'Malta': 0.51, 'which': 0.12, '__': 0.04, '______': 0.04, ':': 0.04}	0	0.507812	0	1	key	key|target	0.96	TRUE	TRUE	TRUE	target	{'malta': 0.96}
Factual Knowledge	capital_world	Beirut is to Lebanon as Kampala is to	uganda	Uganda	0.46	1	1	{'Uganda': 0.46, '______': 0.09, '__': 0.06, 'what': 0.04, '_____': 0.03}	0	0.462891	0	1	key	key|target	0.96	TRUE	TRUE	TRUE	target	{'uganda': 0.96}
Factual Knowledge	capital_world	Doha is to Qatar as Havana is to	cuba	Cuba	0.46	1	1	{'Cuba': 0.46, ':': 0.12, '______': 0.06, '_____': 0.03, '___': 0.03}	0	0.458984	0	1	key	key|target	0.96	TRUE	TRUE	TRUE	target	{'cuba': 0.96}
Factual Knowledge	capital_world	Kyrgyzstan is to Bishkek as Finland is to	helsinki	Helsinki	0.44	1	1	{'Helsinki': 0.44, '______': 0.05, '__': 0.05, ':': 0.03}	0	0.439453	0	1	key	key|target	0.96	TRUE	TRUE	TRUE	target	{'helsinki': 0.96}
Factual Knowledge	country_capital	Ukraine is to Kiev as Philippines is to	manila	Manila	0.43	1	1	{'Manila': 0.43, '______': 0.12, '__': 0.06, '____': 0.05, '_____': 0.04}	0	0.425781	0	1	key	key|target	0.96	TRUE	TRUE	TRUE	target	{'manila': 0.96}
Factual Knowledge	capital_world	Ukraine is to Kiev as Philippines is to	manila	Manila	0.43	1	1	{'Manila': 0.43, '______': 0.12, '__': 0.06, '____': 0.05, '_____': 0.04}	0	0.425781	0	1	key	key|target	0.96	TRUE	TRUE	TRUE	target	{'manila': 0.96}
Factual Knowledge	capital_world	Vilnius is to Lithuania as Abuja is to	nigeria	Nigeria	0.41	1	1	{'Nigeria': 0.41, '______': 0.1, '__': 0.07, 'which': 0.05, 'what': 0.05}	0	0.412109	0	1	key	key|target	0.96	TRUE	TRUE	TRUE	target	{'nigeria': 0.96}
Factual Knowledge	country_capital	Brussels is to Belgium as Taipei is to	taiwan	Taiwan	0.36	1	1	{'Taiwan': 0.36, 'China': 0.09, '______': 0.07, '__': 0.07, 'the': 0.05}	0	0.361328	0	1	key	key|target	0.96	TRUE	TRUE	TRUE	target	{'taiwan': 0.96}
Factual Knowledge	capital_world	Nairobi is to Kenya as Nicosia is to	cyprus	Cyprus	0.32	1	1	{'Cyprus': 0.32, 'which': 0.09, 'what': 0.08, '______': 0.06, '__': 0.06}	0	0.318359	0	1	key	key|target	0.96	TRUE	TRUE	TRUE	target	{'cyprus': 0.96}
Factual Knowledge	capital_world	Dublin is to Ireland as Khartoum is to	sudan	Sudan	0.27	1	1	{'Sudan': 0.27, 'what': 0.13, '__': 0.07, '______': 0.06, 'the': 0.04}	0	0.265625	0	1	key	key|target	0.96	TRUE	TRUE	TRUE	target	{'sudan': 0.96}
Factual Knowledge	capital_world	Tunis is to Tunisia as Astana is to	kazakhstan	Kazakhstan	0.24	1	1	{'Kazakhstan': 0.24, 'what': 0.11, 'which': 0.11, '?': 0.05, '__': 0.03}	0	0.240234	0	1	key	key|target	0.96	TRUE	TRUE	TRUE	target	{'kazakhstan': 0.96}
Factual Knowledge	capital_world	Fiji is to Suva as Iran is to	tehran	Tehran	0.24	1	1	{'Tehran': 0.24, '__': 0.07, '______': 0.06, '___': 0.05, ':': 0.04}	0	0.237305	0	1	key	key|target	0.96	TRUE	TRUE	TRUE	target	{'tehran': 0.96}
Factual Knowledge	country_capital	Bangladesh is to Dhaka as Cuba is to	havana	Havana	0.22	1	1	{'Havana': 0.22, ':': 0.07, '______': 0.07, '__': 0.06}	0	0.22168	0	1	key	key|target	0.96	TRUE	TRUE	TRUE	target	{'havana': 0.96}
Factual Knowledge	capital_world	Bangladesh is to Dhaka as Cuba is to	havana	Havana	0.22	1	1	{'Havana': 0.22, ':': 0.07, '______': 0.07, '__': 0.06}	0	0.22168	0	1	key	key|target	0.96	TRUE	TRUE	TRUE	target	{'havana': 0.96}
Factual Knowledge	capital_world	Nairobi is to Kenya as Skopje is to	macedonia	Macedonia	0.2	1	1	{'Macedonia': 0.2, 'what': 0.18, 'which': 0.08, '______': 0.04, '__': 0.04}	0	0.202148	0	1	key	key|target	0.96	TRUE	TRUE	TRUE	target	{'macedonia': 0.96}
Factual Knowledge	capital_world	Nepal is to Kathmandu as Peru is to	lima	Lima	0.13	1	1	{'Lima': 0.13, 'C': 0.13, '______': 0.1, '__': 0.1, ':': 0.03}	0	0.134766	0	1	key	key|target	0.96	TRUE	TRUE	TRUE	target	{'lima': 0.96}
Factual Knowledge	country_capital	Serbia is to Belgrade as Philippines is to	manila	______	0.12	0	1	{'______': 0.12, 'Manila': 0.12, '?': 0.09, '__': 0.06, '____': 0.04}	1	0.121582	0	0.99999	key	key|target	0.96	TRUE	TRUE	TRUE	target	{'manila': 0.96}
Factual Knowledge	capital_world	Managua is to Nicaragua as Maputo is to	mozambique	Moz	0.73	0.5	0.5	{'Moz': 0.73, 'what': 0.07, '__': 0.03, 'which': 0.02, '______': 0.02}	0	0.730469	0	1	key	key|target	0.96	TRUE	TRUE	TRUE	target	{'mozambique': 0.96}
Factual Knowledge	capital_world	Doha is to Qatar as Georgetown is to	guyana	Guy	0.45	0.5	0.5	{'Guy': 0.45, ':': 0.04, 'the': 0.04, 'what': 0.04, '__': 0.03}	0	0.449219	0	1	key	key|target	0.96	TRUE	TRUE	TRUE	target	{'guyana': 0.96}
Factual Knowledge	capital_world	Accra is to Ghana as Asmara is to	eritrea	E	0.42	0.5	0.5	{'E': 0.42, 'what': 0.12, 'which': 0.05, '__': 0.04, '?': 0.03}	28	0.00427246	0.411743	0.999721	key	key|target	0.96	TRUE	TRUE	TRUE	target	{'eritrea': 0.96}
Factual Knowledge	capital_world	Nepal is to Kathmandu as Montenegro is to	podgorica	Pod	0.29	0.5	0.5	{'Pod': 0.29, '__': 0.06, '?"': 0.03, 'what': 0.03}	0	0.285156	0	1	key	key|target	0.96	TRUE	TRUE	TRUE	target	{'podgorica': 0.96}
Factual Knowledge	capital_world	Uzbekistan is to Tashkent as Nigeria is to	abuja	Abu	0.29	0.5	0.5	{'Abu': 0.29, 'Lagos': 0.07, '______': 0.05, '_____': 0.05, '__': 0.04}	0	0.294922	0	1	key	key|target	0.96	TRUE	TRUE	TRUE	target	{'abuja': 0.96}
Factual Knowledge	capital_world	Mozambique is to Maputo as Cyprus is to	nicosia	N	0.22	0.5	0.5	{'N': 0.22, '__': 0.16, '': 0.05, 'L': 0.04, 'Lim': 0.03}	112	0.000432968	0.224176	0.998884	key	key|target	0.96	TRUE	TRUE	TRUE	target	{'nicosia': 0.96}
Factual Knowledge	capital_world	France is to Paris as Jordan is to	amman	Am	0.22	0.5	0.5	{'Am': 0.22, 'A': 0.09, '__': 0.09, '______': 0.05, 'what': 0.04}	0	0.217773	0	1	key	key|target	0.96	TRUE	TRUE	TRUE	target	{'amman': 0.96}
Factual Knowledge	capital_world	Uzbekistan is to Tashkent as Jordan is to	amman	Am	0.21	0.5	0.5	{'Am': 0.21, 'what': 0.07, '?': 0.05, '__': 0.04, '______': 0.03}	0	0.206055	0	1	key	key|target	0.96	TRUE	TRUE	TRUE	target	{'amman': 0.96}
Factual Knowledge	capital_world	Uruguay is to Montevideo as Macedonia is to	skopje	Sk	0.19	0.5	0.5	{'Sk': 0.19, '______': 0.1, '__': 0.09, 'what': 0.05, ':': 0.04}	0	0.192383	0	1	key	key|target	0.96	TRUE	TRUE	TRUE	target	{'skopje': 0.96}
Factual Knowledge	capital_world	Fiji is to Suva as Liechtenstein is to	vaduz	Vad	0.17	0.5	0.5	{'Vad': 0.17, '__': 0.1, '______': 0.05, ':': 0.04}	0	0.166016	0	1	key	key|target	0.96	TRUE	TRUE	TRUE	target	{'vaduz': 0.96}
Factual Knowledge	capital_world	Ghana is to Accra as Romania is to	bucharest	:	0.09	0	0.5	{':': 0.08, '______': 0.06, 'Buch': 0.06, '': 0.04}	3	0.0561523	0.0307617	0.99997	key	key|target	0.96	TRUE	TRUE	TRUE	target	{'bucharest': 0.96}
Factual Knowledge	capital_world	Uruguay is to Montevideo as Georgia is to	tbilisi	Atlanta	0.28	0	0	{'Atlanta': 0.28, '______': 0.09, '__': 0.07, ':': 0.03}	425	3.43323e-05	0.275356	0.995765	key	key|target	0.96	TRUE	TRUE	TRUE	target	{'tbilisi': 0.96}
Factual Knowledge	capital_world	Albania is to Tirana as Eritrea is to	asmara	?	0.28	0	0	{'?': 0.05, '?"': 0.08, 'what': 0.05}	10	0.0166016	0.260742	0.9999	key	key|target	0.96	TRUE	TRUE	TRUE	target	{'asmara': 0.96}
Factual Knowledge	country_language	Guam is to English as Iran is to	persian	______	0.16	0	0	{'______': 0.16, '_____': 0.12, '___': 0.06, 'Arabic': 0.06, '____': 0.06}	5	0.0336914	0.126465	0.99995	key	key|target	0.96	TRUE	TRUE	TRUE	target	{'persian': 0.96}
Factual Knowledge	capital_world	Guyana is to Georgetown as Oman is to	muscat	?	0.13	0	0	{'?': 0.11, '____': 0.05, '______': 0.05, '_____': 0.05}	11	0.0257568	0.105103	0.99989	key	key|target	0.96	TRUE	TRUE	TRUE	target	{'muscat': 0.96}
Factual Knowledge	capital_world	Yerevan is to Armenia as Athens is to	greece	Greece	0.97	1	1	{'Greece': 0.97, '': 0.0, 'the': 0.0, 'modern': 0.0}	0	0.96875	0	1	key	key|target	0.95	TRUE	TRUE	TRUE	target	{'greece': 0.95}
Factual Knowledge	country_capital	Jakarta is to Indonesia as Ottawa is to	canada	Canada	0.96	1	1	{'Canada': 0.96, '__': 0.0, '______': 0.0, 'the': 0.0, 'what': 0.0}	0	0.964844	0	1	key	key|target	0.95	TRUE	TRUE	TRUE	target	{'canada': 0.95}
Factual Knowledge	capital_world	Apia is to Samoa as Bern is to	switzerland	Switzerland	0.96	1	1	{'Switzerland': 0.96, 'the': 0.01, 'Europe': 0.0, 'Sw': 0.0, 'Lie': 0.0}	0	0.960938	0	1	key	key|target	0.95	TRUE	TRUE	TRUE	target	{'switzerland': 0.95}
Factual Knowledge	capital_world	Jakarta is to Indonesia as Ottawa is to	canada	Canada	0.96	1	1	{'Canada': 0.96, '__': 0.0, '______': 0.0, 'the': 0.0, 'what': 0.0}	0	0.964844	0	1	key	key|target	0.95	TRUE	TRUE	TRUE	target	{'canada': 0.95}
Factual Knowledge	capital_world	Yerevan is to Armenia as Copenhagen is to	denmark	Denmark	0.96	1	1	{'Denmark': 0.96, 'Scandin': 0.01, 'the': 0.0, 'Sweden': 0.0, '': 0.0}	0	0.957031	0	1	key	key|target	0.95	TRUE	TRUE	TRUE	target	{'denmark': 0.95}
Factual Knowledge	capital_world	Helsinki is to Finland as Canberra is to	australia	Australia	0.94	1	1	{'Australia': 0.94, '______': 0.01, '__': 0.0, 'which': 0.0, 'what': 0.0}	0	0.941406	0	1	key	key|target	0.95	TRUE	TRUE	TRUE	target	{'australia': 0.95}
Factual Knowledge	country_capital	Beirut is to Lebanon as Lima is to	peru	Peru	0.92	1	1	{'Peru': 0.92, '______': 0.01, 'Per': 0.01, '__': 0.01, 'what': 0.01}	0	0.921875	0	1	key	key|target	0.95	TRUE	TRUE	TRUE	target	{'peru': 0.95}
Factual Knowledge	country_capital	Helsinki is to Finland as Madrid is to	spain	Spain	0.86	1	1	{'Spain': 0.86, '______': 0.02, 'what': 0.01, '__': 0.01, '_____': 0.01}	0	0.855469	0	1	key	key|target	0.95	TRUE	TRUE	TRUE	target	{'spain': 0.95}
Factual Knowledge	capital_world	Beirut is to Lebanon as Kigali is to	rwanda	Rwanda	0.86	1	1	{'Rwanda': 0.86, '': 0.02, 'what': 0.01, '______': 0.01, 'the': 0.01}	0	0.863281	0	1	key	key|target	0.95	TRUE	TRUE	TRUE	target	{'rwanda': 0.95}
Factual Knowledge	capital_world	Helsinki is to Finland as Madrid is to	spain	Spain	0.86	1	1	{'Spain': 0.86, '______': 0.02, 'what': 0.01, '__': 0.01, '_____': 0.01}	0	0.855469	0	1	key	key|target	0.95	TRUE	TRUE	TRUE	target	{'spain': 0.95}
Factual Knowledge	capital_world	Podgorica is to Montenegro as Tegucigalpa is to	honduras	Honduras	0.84	1	1	{'Honduras': 0.84, 'what': 0.03, '__': 0.02, '______': 0.02, '': 0.01}	0	0.839844	0	1	key	key|target	0.95	TRUE	TRUE	TRUE	target	{'honduras': 0.95}
Factual Knowledge	capital_world	Roseau is to Dominica as Tegucigalpa is to	honduras	Honduras	0.82	1	1	{'Honduras': 0.82, 'what': 0.04, 'which': 0.02, '______': 0.01, '__': 0.01}	0	0.816406	0	1	key	key|target	0.95	TRUE	TRUE	TRUE	target	{'honduras': 0.95}
Factual Knowledge	capital_world	Santiago is to Chile as Bangkok is to	thailand	Thailand	0.8	1	1	{'Thailand': 0.8, 'what': 0.02, '______': 0.02, '__': 0.01, '_____': 0.01}	0	0.800781	0	1	key	key|target	0.95	TRUE	TRUE	TRUE	target	{'thailand': 0.95}
Factual Knowledge	country_capital	Conakry is to Guinea as Vienna is to	austria	Austria	0.79	1	1	{'Austria': 0.79, '______': 0.04, '__': 0.03, 'what': 0.02, 'the': 0.01}	0	0.789062	0	1	key	key|target	0.95	TRUE	TRUE	TRUE	target	{'austria': 0.95}
Factual Knowledge	capital_world	Kabul is to Afghanistan as Canberra is to	australia	Australia	0.75	1	1	{'Australia': 0.75, '______': 0.04, '__': 0.03, 'what': 0.01, 'which': 0.01}	0	0.75	0	1	key	key|target	0.95	TRUE	TRUE	TRUE	target	{'australia': 0.95}
Factual Knowledge	capital_world	Kyrgyzstan is to Bishkek as Denmark is to	copenhagen	Copenhagen	0.71	1	1	{'Copenhagen': 0.71, ':': 0.02, '': 0.01}	0	0.707031	0	1	key	key|target	0.95	TRUE	TRUE	TRUE	target	{'copenhagen': 0.95}
Factual Knowledge	country_capital	Beirut is to Lebanon as Taipei is to	taiwan	Taiwan	0.69	1	1	{'Taiwan': 0.69, 'China': 0.04, '__': 0.03, '______': 0.03, 'the': 0.02}	0	0.6875	0	1	key	key|target	0.95	TRUE	TRUE	TRUE	target	{'taiwan': 0.95}
Factual Knowledge	capital_world	Helsinki is to Finland as Hanoi is to	vietnam	Vietnam	0.68	1	1	{'Vietnam': 0.68, 'Viet': 0.08, '______': 0.04, 'what': 0.02, '__': 0.02}	0	0.675781	0	1	key	key|target	0.95	TRUE	TRUE	TRUE	target	{'vietnam': 0.95}
Factual Knowledge	capital_world	Vientiane is to Laos as Abuja is to	nigeria	Nigeria	0.64	1	1	{'Nigeria': 0.64, '______': 0.06, '__': 0.05, 'what': 0.03, 'which': 0.03}	0	0.636719	0	1	key	key|target	0.95	TRUE	TRUE	TRUE	target	{'nigeria': 0.95}
Factual Knowledge	capital_world	Kyrgyzstan is to Bishkek as Jamaica is to	kingston	Kingston	0.62	1	1	{'Kingston': 0.62, '': 0.02, '__': 0.04, ':': 0.03}	0	0.621094	0	1	key	key|target	0.95	TRUE	TRUE	TRUE	target	{'kingston': 0.95}
Factual Knowledge	country_capital	Ukraine is to Kiev as Italy is to	rome	Rome	0.59	1	1	{'Rome': 0.59, '__': 0.04, ':': 0.03, '______': 0.03}	0	0.589844	0	1	key	key|target	0.95	TRUE	TRUE	TRUE	target	{'rome': 0.95}
Factual Knowledge	capital_world	Ukraine is to Kiev as Italy is to	rome	Rome	0.59	1	1	{'Rome': 0.59, '__': 0.04, ':': 0.03, '______': 0.03}	0	0.589844	0	1	key	key|target	0.95	TRUE	TRUE	TRUE	target	{'rome': 0.95}
Factual Knowledge	capital_world	Cairo is to Egypt as Bern is to	switzerland	Switzerland	0.58	1	1	{'Switzerland': 0.58, 'what': 0.03, '?': 0.02, 'which': 0.02, '______': 0.02}	0	0.582031	0	1	key	key|target	0.95	TRUE	TRUE	TRUE	target	{'switzerland': 0.95}
Factual Knowledge	capital_world	Kathmandu is to Nepal as Managua is to	nicaragua	Nicaragua	0.51	1	1	{'Nicaragua': 0.51, '______': 0.09, 'what': 0.09, '_____': 0.04, '__': 0.03}	0	0.511719	0	1	key	key|target	0.95	TRUE	TRUE	TRUE	target	{'nicaragua': 0.95}
Factual Knowledge	country_capital	Helsinki is to Finland as Taipei is to	taiwan	Taiwan	0.5	1	1	{'Taiwan': 0.5, '__': 0.05, '______': 0.05, '?': 0.04, '_____': 0.03}	0	0.5	0	1	key	key|target	0.95	TRUE	TRUE	TRUE	target	{'taiwan': 0.95}
Factual Knowledge	capital_world	Paris is to France as Cairo is to	egypt	Egypt	0.46	1	1	{'Egypt': 0.46, 'what': 0.07, '______': 0.05, '__': 0.03, '?': 0.02}	0	0.462891	0	1	key	key|target	0.95	TRUE	TRUE	TRUE	target	{'egypt': 0.95}
Factual Knowledge	capital_world	Tirana is to Albania as Ankara is to	turkey	Turkey	0.44	1	1	{'Turkey': 0.44, '______': 0.1, '__': 0.1, 'what': 0.03, '____': 0.03}	0	0.441406	0	1	key	key|target	0.95	TRUE	TRUE	TRUE	target	{'turkey': 0.95}
Factual Knowledge	capital_world	Somalia is to Mogadishu as Bulgaria is to	sofia	Sofia	0.44	1	1	{'Sofia': 0.44, ':': 0.05, 'what': 0.04, '?': 0.03}	0	0.441406	0	1	key	key|target	0.95	TRUE	TRUE	TRUE	target	{'sofia': 0.95}
Factual Knowledge	capital_world	Guyana is to Georgetown as Finland is to	helsinki	Helsinki	0.43	1	1	{'Helsinki': 0.43, '______': 0.07, '?': 0.04, ':': 0.03}	0	0.425781	0	1	key	key|target	0.95	TRUE	TRUE	TRUE	target	{'helsinki': 0.95}
Factual Knowledge	country_capital	Ukraine is to Kiev as Austria is to	vienna	Vienna	0.42	1	1	{'Vienna': 0.42, '__': 0.08, '______': 0.06, '____': 0.03, 'what': 0.03}	0	0.423828	0	1	key	key|target	0.95	TRUE	TRUE	TRUE	target	{'vienna': 0.95}
Factual Knowledge	country_capital	Stockholm is to Sweden as Taipei is to	taiwan	Taiwan	0.42	1	1	{'Taiwan': 0.42, '__': 0.06, '______': 0.05, '?': 0.04, ':': 0.03}	0	0.421875	0	1	key	key|target	0.95	TRUE	TRUE	TRUE	target	{'taiwan': 0.95}
Factual Knowledge	capital_world	Tbilisi is to Georgia as Abuja is to	nigeria	Nigeria	0.42	1	1	{'Nigeria': 0.42, '______': 0.11, '__': 0.07, '_____': 0.03, '___': 0.03}	0	0.419922	0	1	key	key|target	0.95	TRUE	TRUE	TRUE	target	{'nigeria': 0.95}
Factual Knowledge	capital_world	Stockholm is to Sweden as Taipei is to	taiwan	Taiwan	0.42	1	1	{'Taiwan': 0.42, '__': 0.06, '______': 0.05, '?': 0.04, ':': 0.03}	0	0.421875	0	1	key	key|target	0.95	TRUE	TRUE	TRUE	target	{'taiwan': 0.95}
Factual Knowledge	capital_world	Paramaribo is to Suriname as Vienna is to	austria	Austria	0.41	1	1	{'Austria': 0.41, 'what': 0.13, '__': 0.08, '______': 0.07, ':': 0.05}	0	0.410156	0	1	key	key|target	0.95	TRUE	TRUE	TRUE	target	{'austria': 0.95}
Factual Knowledge	country_language	Guadeloupe is to French as Netherlands is to	dutch	Dutch	0.37	1	1	{'Dutch': 0.37, 'Belgium': 0.06, 'English': 0.05, 'what': 0.04, '?': 0.04}	0	0.373047	0	1	key	key|target	0.95	TRUE	TRUE	TRUE	target	{'dutch': 0.95}
Factual Knowledge	capital_world	Montevideo is to Uruguay as Nicosia is to	cyprus	Cyprus	0.35	1	1	{'Cyprus': 0.35, 'what': 0.11, 'which': 0.1, '__': 0.07, ':': 0.04}	0	0.351562	0	1	key	key|target	0.95	TRUE	TRUE	TRUE	target	{'cyprus': 0.95}
Factual Knowledge	capital_world	Ljubljana is to Slovenia as Suva is to	fiji	Fiji	0.35	1	1	{'Fiji': 0.35, 'what': 0.1, 'which': 0.06, '______': 0.05, '____': 0.03}	0	0.351562	0	1	key	key|target	0.95	TRUE	TRUE	TRUE	target	{'fiji': 0.95}
Factual Knowledge	name_occupation	descartes is to mathematician as hawking is to	physicist	physicist	0.34	1	1	{'physicist': 0.34, 'scientist': 0.1, 'cosm': 0.06, '?': 0.04, 'ast': 0.03}	0	0.337891	0	1	key	key|target	0.95	TRUE	TRUE	TRUE	target	{'physicist': 0.95}
Factual Knowledge	capital_world	Harare is to Zimbabwe as Khartoum is to	sudan	Sudan	0.32	1	1	{'Sudan': 0.32, '__': 0.1, 'what': 0.1, '______': 0.06, '___': 0.05}	0	0.324219	0	1	key	key|target	0.95	TRUE	TRUE	TRUE	target	{'sudan': 0.95}
Factual Knowledge	capital_world	Uzbekistan is to Tashkent as Austria is to	vienna	Vienna	0.31	1	1	{'Vienna': 0.31, 'what': 0.05, '__': 0.04, '?': 0.04, ':': 0.03}	0	0.308594	0	1	key	key|target	0.95	TRUE	TRUE	TRUE	target	{'vienna': 0.95}
Factual Knowledge	capital_world	Ljubljana is to Slovenia as Skopje is to	macedonia	what	0.26	0	1	{'what': 0.26, 'which': 0.14, 'Macedonia': 0.1, '?': 0.08, '______': 0.02}	2	0.0981445	0.159668	0.99998	key	key|target	0.95	TRUE	TRUE	TRUE	target	{'macedonia': 0.95}
Factual Knowledge	capital_world	Dakar is to Senegal as Lima is to	peru	Peru	0.25	1	1	{'Peru': 0.25, ':': 0.05, '______': 0.1, 'what': 0.06}	0	0.248047	0	1	key	key|target	0.95	TRUE	TRUE	TRUE	target	{'peru': 0.95}
Factual Knowledge	capital_world	Suriname is to Paramaribo as Iran is to	tehran	Tehran	0.25	1	1	{'Tehran': 0.25, ':': 0.1, '?': 0.06, '__': 0.04, '': 0.04}	0	0.25	0	1	key	key|target	0.95	TRUE	TRUE	TRUE	target	{'tehran': 0.95}
Factual Knowledge	country_capital	Indonesia is to Jakarta as Iran is to	tehran	Tehran	0.23	1	1	{'Tehran': 0.23, ':': 0.06, '?': 0.05, '______': 0.04, '__': 0.04}	0	0.225586	0	1	key	key|target	0.95	TRUE	TRUE	TRUE	target	{'tehran': 0.95}
Factual Knowledge	country_capital	Chile is to Santiago as Sweden is to	stockholm	Stockholm	0.22	1	1	{'Stockholm': 0.22, '______': 0.09, '_____': 0.05, '____': 0.05, 'A': 0.04}	0	0.22168	0	1	key	key|target	0.95	TRUE	TRUE	TRUE	target	{'stockholm': 0.95}
Factual Knowledge	capital_world	Chile is to Santiago as Sweden is to	stockholm	Stockholm	0.22	1	1	{'Stockholm': 0.22, '______': 0.09, '_____': 0.05, '____': 0.05, 'A': 0.04}	0	0.22168	0	1	key	key|target	0.95	TRUE	TRUE	TRUE	target	{'stockholm': 0.95}
Factual Knowledge	capital_world	Tallinn is to Estonia as Ankara is to	turkey	Turkey	0.21	1	1	{'Turkey': 0.21, '__': 0.13, '______': 0.1, 'what': 0.1, 'which': 0.04}	0	0.208984	0	1	key	key|target	0.95	TRUE	TRUE	TRUE	target	{'turkey': 0.95}
Factual Knowledge	capital_world	Tashkent is to Uzbekistan as Ankara is to	turkey	Turkey	0.16	1	1	{'Turkey': 0.16, '__': 0.12, 'what': 0.1, '______': 0.09, 'which': 0.06}	0	0.158203	0	1	key	key|target	0.95	TRUE	TRUE	TRUE	target	{'turkey': 0.95}
Factual Knowledge	capital_world	Bucharest is to Romania as Kigali is to	rwanda	Rwanda	0.15	1	1	{'Rwanda': 0.15, 'what': 0.08, ':': 0.07, '______': 0.06, '__': 0.06}	0	0.154297	0	1	key	key|target	0.95	TRUE	TRUE	TRUE	target	{'rwanda': 0.95}
Factual Knowledge	capital_world	Chile is to Santiago as Tunisia is to	tunis	__	0.14	0	1	{'__': 0.14, 'Tunis': 0.14, '______': 0.09, '____': 0.07, '_____': 0.04}	1	0.135742	0	0.99999	key	key|target	0.95	TRUE	TRUE	TRUE	target	{'tunis': 0.95}
Factual Knowledge	capital_world	Venezuela is to Caracas as Philippines is to	manila	?	0.12	0	1	{'?': 0.12, 'Manila': 0.12, '______': 0.1, '__': 0.07, '': 0.05}	1	0.117676	0.00732422	0.99999	key	key|target	0.95	TRUE	TRUE	TRUE	target	{'manila': 0.95}
Factual Knowledge	capital_world	Burundi is to Bujumbura as Cuba is to	havana		0.11	0	1	{'': 0.06, 'Havana': 0.11, '______': 0.08, '__': 0.06}	1	0.109863	0	0.99999	key	key|target	0.95	TRUE	TRUE	TRUE	target	{'havana': 0.95}
Factual Knowledge	capital_world	Niamey is to Niger as Oslo is to	norway	Norway	0.08	1	1	{'Norway': 0.08, '______': 0.08, 'which': 0.07, '?': 0.06, 'A': 0.06}	0	0.0839844	0	1	key	key|target	0.95	TRUE	TRUE	TRUE	target	{'norway': 0.95}
Factual Knowledge	capital_world	Algiers is to Algeria as Gaborone is to	botswana	Bot	0.82	0.5	0.5	{'Bot': 0.82, 'what': 0.02, '______': 0.02, '__': 0.01, 'which': 0.01}	0	0.824219	0	1	key	key|target	0.95	TRUE	TRUE	TRUE	target	{'botswana': 0.95}
Factual Knowledge	capital_world	Antananarivo is to Madagascar as Georgetown is to	guyana	Guy	0.7	0.5	0.5	{'Guy': 0.7, 'British': 0.03, 'which': 0.02, 'what': 0.02, '______': 0.02}	0	0.699219	0	1	key	key|target	0.95	TRUE	TRUE	TRUE	target	{'guyana': 0.95}
Factual Knowledge	capital_world	Yerevan is to Armenia as Asmara is to	eritrea	E	0.6	0.5	0.5	{'E': 0.6, '__': 0.07, 'what': 0.04, '______': 0.04, '____': 0.02}	41	0.00119781	0.600365	0.999591	key	key|target	0.95	TRUE	TRUE	TRUE	target	{'eritrea': 0.95}
Factual Knowledge	capital_world	Algiers is to Algeria as Dushanbe is to	tajikistan	Taj	0.42	0.5	0.5	{'Taj': 0.42, 'what': 0.12, 'which': 0.09, '?': 0.04, '__': 0.02}	0	0.419922	0	1	key	key|target	0.95	TRUE	TRUE	TRUE	target	{'tajikistan': 0.95}
Factual Knowledge	capital_world	Nepal is to Kathmandu as Zambia is to	lusaka	L	0.24	0.5	0.5	{'L': 0.24, '__': 0.07, '______': 0.06, '____': 0.03, ':': 0.03}	91	0.000976562	0.237305	0.999093	key	key|target	0.95	TRUE	TRUE	TRUE	target	{'lusaka': 0.95}
Factual Knowledge	capital_world	Bulgaria is to Sofia as Jordan is to	amman	Am	0.22	0.5	0.5	{'Am': 0.22, '__': 0.09, '______': 0.06, '?': 0.05, 'A': 0.05}	0	0.219727	0	1	key	key|target	0.95	TRUE	TRUE	TRUE	target	{'amman': 0.95}
Factual Knowledge	capital_world	Chile is to Santiago as Libya is to	tripoli	Trip	0.22	0.5	0.5	{'Trip': 0.22, ':': 0.06, '______': 0.06, '__': 0.04, '"': 0.04}	0	0.224609	0	1	key	key|target	0.95	TRUE	TRUE	TRUE	target	{'tripoli': 0.95}
Factual Knowledge	capital_world	Madagascar is to Antananarivo as Romania is to	bucharest	Buch	0.2	0.5	0.5	{'Buch': 0.2, '______': 0.09, '__': 0.08, ':': 0.04}	0	0.201172	0	1	key	key|target	0.95	TRUE	TRUE	TRUE	target	{'bucharest': 0.95}
Factual Knowledge	capital_world	Zagreb is to Croatia as Banjul is to	gambia	G	0.2	0.5	0.5	{'G': 0.2, 'The': 0.14, 'the': 0.11, 'what': 0.06, '___': 0.05}	84	0.000488281	0.194824	0.999163	key	key|target	0.95	TRUE	TRUE	TRUE	target	{'gambia': 0.95}
Factual Knowledge	capital_world	Baku is to Azerbaijan as Funafuti is to	tuvalu	Tu	0.18	0.5	0.5	{'Tu': 0.18, '_____': 0.09, '__': 0.08, '___': 0.08, '______': 0.06}	0	0.183594	0	1	key	key|target	0.95	TRUE	TRUE	TRUE	target	{'tuvalu': 0.95}
Factual Knowledge	capital_world	Yerevan is to Armenia as Banjul is to	gambia	The	0.17	0	0.5	{'The': 0.17, 'G': 0.17, 'the': 0.14, 'what': 0.07, '?': 0.05}	87	0.000425339	0.170473	0.999133	key	key|target	0.95	TRUE	TRUE	TRUE	target	{'gambia': 0.95}
Factual Knowledge	capital_world	Sweden is to Stockholm as Vietnam is to	hanoi	H	0.12	0.5	0.5	{'H': 0.12, '______': 0.09, '?': 0.07, '__': 0.07, 'Ho': 0.05}	49	0.0025177	0.122482	0.999512	key	key|target	0.95	TRUE	TRUE	TRUE	target	{'hanoi': 0.95}
Factual Knowledge	country_capital	Indonesia is to Jakarta as Philippines is to	manila	______	0.11	0	0	{'______': 0.11, ':': 0.08, '____': 0.06, '': 0.06, '?': 0.05}	6	0.050293	0.0561523	0.99994	key	key|target	0.95	TRUE	TRUE	TRUE	target	{'manila': 0.95}
Factual Knowledge	capital_world	Indonesia is to Jakarta as Philippines is to	manila	______	0.11	0	0	{'______': 0.11, ':': 0.08, '____': 0.06, '': 0.06, '?': 0.05}	6	0.050293	0.0561523	0.99994	key	key|target	0.95	TRUE	TRUE	TRUE	target	{'manila': 0.95}
Factual Knowledge	capital_world	Georgetown is to Guyana as Lisbon is to	portugal	Portugal	0.92	1	1	{'Portugal': 0.92, 'Brazil': 0.03, 'Angola': 0.01, '': 0.01, 'the': 0.01}	0	0.917969	0	1	key	key|target	0.94	TRUE	TRUE	TRUE	target	{'portugal': 0.94}
Factual Knowledge	capital_world	Algiers is to Algeria as Damascus is to	syria	Syria	0.91	1	1	{'Syria': 0.91, '______': 0.01, '__': 0.01, 'what': 0.01, '_____': 0.0}	0	0.90625	0	1	key	key|target	0.94	TRUE	TRUE	TRUE	target	{'syria': 0.94}
Factual Knowledge	capital_world	Baku is to Azerbaijan as Dublin is to	ireland	Ireland	0.91	1	1	{'Ireland': 0.91, 'the': 0.03, '______': 0.01, '__': 0.01, 'what': 0.0}	0	0.90625	0	1	key	key|target	0.94	TRUE	TRUE	TRUE	target	{'ireland': 0.94}
Factual Knowledge	country_capital	Helsinki is to Finland as Kingston is to	jamaica	Jamaica	0.9	1	1	{'Jamaica': 0.9, 'Canada': 0.03, 'England': 0.01, 'the': 0.0, 'what': 0.0}	0	0.898438	0	1	key	key|target	0.94	TRUE	TRUE	TRUE	target	{'jamaica': 0.94}
Factual Knowledge	capital_world	Apia is to Samoa as Budapest is to	hungary	Hungary	0.9	1	1	{'Hungary': 0.9, 'Europe': 0.01, 'Austria': 0.01, 'the': 0.01, 'Hung': 0.01}	0	0.902344	0	1	key	key|target	0.94	TRUE	TRUE	TRUE	target	{'hungary': 0.94}
Factual Knowledge	capital_world	Helsinki is to Finland as Kingston is to	jamaica	Jamaica	0.9	1	1	{'Jamaica': 0.9, 'Canada': 0.03, 'England': 0.01, 'the': 0.0, 'what': 0.0}	0	0.898438	0	1	key	key|target	0.94	TRUE	TRUE	TRUE	target	{'jamaica': 0.94}
Factual Knowledge	capital_world	Islamabad is to Pakistan as Bern is to	switzerland	Switzerland	0.82	1	1	{'Switzerland': 0.82, '______': 0.02, 'which': 0.02, 'what': 0.02, '__': 0.01}	0	0.816406	0	1	key	key|target	0.94	TRUE	TRUE	TRUE	target	{'switzerland': 0.94}
Factual Knowledge	capital_world	Managua is to Nicaragua as Montevideo is to	uruguay	Uruguay	0.8	1	1	{'Uruguay': 0.8, 'what': 0.07, 'which': 0.02, '______': 0.01, '__': 0.01}	0	0.804688	0	1	key	key|target	0.94	TRUE	TRUE	TRUE	target	{'uruguay': 0.94}
Factual Knowledge	capital_world	Georgetown is to Guyana as Lusaka is to	zambia	Zambia	0.8	1	1	{'Zambia': 0.8, '__': 0.03, '': 0.02, 'what': 0.02, '______': 0.01}	0	0.800781	0	1	key	key|target	0.94	TRUE	TRUE	TRUE	target	{'zambia': 0.94}
Factual Knowledge	capital_world	Managua is to Nicaragua as Mogadishu is to	somalia	Somalia	0.79	1	1	{'Somalia': 0.79, '______': 0.03, '__': 0.03, 'what': 0.02, '': 0.02}	0	0.789062	0	1	key	key|target	0.94	TRUE	TRUE	TRUE	target	{'somalia': 0.94}
Factual Knowledge	capital_world	Canberra is to Australia as Bern is to	switzerland	Switzerland	0.77	1	1	{'Switzerland': 0.77, '______': 0.02, '__': 0.02, '?': 0.02, '_____': 0.02}	0	0.769531	0	1	key	key|target	0.94	TRUE	TRUE	TRUE	target	{'switzerland': 0.94}
Factual Knowledge	capital_world	Jakarta is to Indonesia as Nassau is to	bahamas	the	0.77	0	1	{'the': 0.77, 'The': 0.18, 'Bahamas': 0.02, 'Bermuda': 0.0, '': 0.0}	2	0.0168457	0.752686	0.99998	key	key|target	0.94	TRUE	TRUE	TRUE	target	{'bahamas': 0.94}
Factual Knowledge	country_capital	Conakry is to Guinea as Dublin is to	ireland	Ireland	0.76	1	1	{'Ireland': 0.76, 'the': 0.06, '______': 0.03, '__': 0.03, 'Republic': 0.01}	0	0.761719	0	1	key	key|target	0.94	TRUE	TRUE	TRUE	target	{'ireland': 0.94}
Factual Knowledge	capital_world	Conakry is to Guinea as Dublin is to	ireland	Ireland	0.76	1	1	{'Ireland': 0.76, 'the': 0.06, '______': 0.03, '__': 0.03, 'Republic': 0.01}	0	0.761719	0	1	key	key|target	0.94	TRUE	TRUE	TRUE	target	{'ireland': 0.94}
Factual Knowledge	country_capital	Conakry is to Guinea as Lima is to	peru	Peru	0.75	1	1	{'Peru': 0.75, '__': 0.04, '______': 0.03, 'what': 0.01, '___': 0.01}	0	0.746094	0	1	key	key|target	0.94	TRUE	TRUE	TRUE	target	{'peru': 0.94}
Factual Knowledge	capital_world	Conakry is to Guinea as Lima is to	peru	Peru	0.75	1	1	{'Peru': 0.75, '__': 0.04, '______': 0.03, 'what': 0.01, '___': 0.01}	0	0.746094	0	1	key	key|target	0.94	TRUE	TRUE	TRUE	target	{'peru': 0.94}
Factual Knowledge	capital_world	Antananarivo is to Madagascar as Budapest is to	hungary	Hungary	0.71	1	1	{'Hungary': 0.71, 'Europe': 0.05, '______': 0.03, '__': 0.02, 'what': 0.01}	0	0.714844	0	1	key	key|target	0.94	TRUE	TRUE	TRUE	target	{'hungary': 0.94}
Factual Knowledge	capital_world	Helsinki is to Finland as Mogadishu is to	somalia	Somalia	0.7	1	1	{'Somalia': 0.7, 'what': 0.04, '______': 0.03, '__': 0.02, 'which': 0.02}	0	0.695312	0	1	key	key|target	0.94	TRUE	TRUE	TRUE	target	{'somalia': 0.94}
Factual Knowledge	capital_world	Helsinki is to Finland as Nassau is to	bahamas	the	0.69	0	1	{'the': 0.69, 'The': 0.18, 'Bahamas': 0.02, 'what': 0.01, '___': 0.01}	2	0.0178223	0.673584	0.99998	key	key|target	0.94	TRUE	TRUE	TRUE	target	{'bahamas': 0.94}
Factual Knowledge	capital_world	Kathmandu is to Nepal as Mogadishu is to	somalia	Somalia	0.68	1	1	{'Somalia': 0.68, '______': 0.04, '__': 0.03, '': 0.03, 'what': 0.02}	0	0.679688	0	1	key	key|target	0.94	TRUE	TRUE	TRUE	target	{'somalia': 0.94}
Factual Knowledge	capital_world	Managua is to Nicaragua as Taipei is to	taiwan	Taiwan	0.67	1	1	{'Taiwan': 0.67, 'China': 0.07, 'the': 0.05, '__': 0.04, '______': 0.03}	0	0.667969	0	1	key	key|target	0.94	TRUE	TRUE	TRUE	target	{'taiwan': 0.94}
Factual Knowledge	capital_world	Taipei is to Taiwan as Tegucigalpa is to	honduras	Honduras	0.67	1	1	{'Honduras': 0.67, 'what': 0.08, '______': 0.04, '__': 0.04, 'which': 0.01}	0	0.667969	0	1	key	key|target	0.94	TRUE	TRUE	TRUE	target	{'honduras': 0.94}
Factual Knowledge	country_language	Bolivia is to Spanish as Netherlands is to	dutch	Dutch	0.64	1	1	{'Dutch': 0.64, '______': 0.03, 'Flem': 0.02, '': 0.02, 'English': 0.02}	0	0.640625	0	1	key	key|target	0.94	TRUE	TRUE	TRUE	target	{'dutch': 0.94}
Factual Knowledge	capital_world	Algiers is to Algeria as Dhaka is to	bangladesh	Bangladesh	0.64	1	1	{'Bangladesh': 0.64, '______': 0.05, 'what': 0.05, '__': 0.03, '_____': 0.02}	0	0.640625	0	1	key	key|target	0.94	TRUE	TRUE	TRUE	target	{'bangladesh': 0.94}
Factual Knowledge	country_capital	Dhaka is to Bangladesh as Lisbon is to	portugal	Portugal	0.63	1	1	{'Portugal': 0.63, '______': 0.05, '__': 0.04, 'which': 0.02, 'what': 0.02}	0	0.632812	0	1	key	key|target	0.94	TRUE	TRUE	TRUE	target	{'portugal': 0.94}
Factual Knowledge	capital_world	Dhaka is to Bangladesh as Lisbon is to	portugal	Portugal	0.63	1	1	{'Portugal': 0.63, '______': 0.05, '__': 0.04, 'which': 0.02, 'what': 0.02}	0	0.632812	0	1	key	key|target	0.94	TRUE	TRUE	TRUE	target	{'portugal': 0.94}
Factual Knowledge	capital_world	Beirut is to Lebanon as Harare is to	zimbabwe	Zimbabwe	0.61	1	1	{'Zimbabwe': 0.61, 'what': 0.1, '______': 0.03, 'which': 0.02, ':': 0.02}	0	0.605469	0	1	key	key|target	0.94	TRUE	TRUE	TRUE	target	{'zimbabwe': 0.94}
Factual Knowledge	capital_world	Vilnius is to Lithuania as Amman is to	jordan	Jordan	0.6	1	1	{'Jordan': 0.6, 'what': 0.09, '__': 0.05, '______': 0.04, 'which': 0.02}	0	0.597656	0	1	key	key|target	0.94	TRUE	TRUE	TRUE	target	{'jordan': 0.94}
Factual Knowledge	capital_world	Managua is to Nicaragua as Rabat is to	morocco	Morocco	0.59	1	1	{'Morocco': 0.59, 'what': 0.07, '__': 0.05, '______': 0.03, 'which': 0.03}	0	0.59375	0	1	key	key|target	0.94	TRUE	TRUE	TRUE	target	{'morocco': 0.94}
Factual Knowledge	capital_world	Jakarta is to Indonesia as Managua is to	nicaragua	Nicaragua	0.59	1	1	{'Nicaragua': 0.59, 'what': 0.11, '______': 0.06, '_____': 0.03, '__': 0.03}	0	0.589844	0	1	key	key|target	0.94	TRUE	TRUE	TRUE	target	{'nicaragua': 0.94}
Factual Knowledge	capital_world	Dakar is to Senegal as Madrid is to	spain	Spain	0.57	1	1	{'Spain': 0.57, '______': 0.09, ':': 0.04, '____': 0.03, '_____': 0.03}	0	0.566406	0	1	key	key|target	0.94	TRUE	TRUE	TRUE	target	{'spain': 0.94}
Factual Knowledge	capital_world	Kiev is to Ukraine as Rabat is to	morocco	Morocco	0.54	1	1	{'Morocco': 0.54, 'what': 0.05, '__': 0.04, '______': 0.03, '___': 0.02}	0	0.542969	0	1	key	key|target	0.94	TRUE	TRUE	TRUE	target	{'morocco': 0.94}
Factual Knowledge	capital_world	Kabul is to Afghanistan as Nassau is to	bahamas	the	0.49	0	1	{'the': 0.49, 'The': 0.14, 'Bahamas': 0.04, '__': 0.03, 'what': 0.03}	2	0.0444336	0.449707	0.99998	key	key|target	0.94	TRUE	TRUE	TRUE	target	{'bahamas': 0.94}
Factual Knowledge	country_capital	Indonesia is to Jakarta as Jamaica is to	kingston	Kingston	0.46	1	1	{'Kingston': 0.46, '__': 0.06, ':': 0.06, '': 0.04, '______': 0.03}	0	0.462891	0	1	key	key|target	0.94	TRUE	TRUE	TRUE	target	{'kingston': 0.94}
Factual Knowledge	capital_world	Indonesia is to Jakarta as Jamaica is to	kingston	Kingston	0.46	1	1	{'Kingston': 0.46, '__': 0.06, ':': 0.06, '': 0.04, '______': 0.03}	0	0.462891	0	1	key	key|target	0.94	TRUE	TRUE	TRUE	target	{'kingston': 0.94}
Factual Knowledge	country_capital	Beirut is to Lebanon as Islamabad is to	pakistan	Pakistan	0.45	1	1	{'Pakistan': 0.45, '______': 0.12, '__': 0.06, '_____': 0.04, ':': 0.03}	0	0.449219	0	1	key	key|target	0.94	TRUE	TRUE	TRUE	target	{'pakistan': 0.94}
Factual Knowledge	capital_world	Beirut is to Lebanon as Islamabad is to	pakistan	Pakistan	0.45	1	1	{'Pakistan': 0.45, '______': 0.12, '__': 0.06, '_____': 0.04, ':': 0.03}	0	0.449219	0	1	key	key|target	0.94	TRUE	TRUE	TRUE	target	{'pakistan': 0.94}
Factual Knowledge	name_occupation	hume is to philosopher as shakespeare is to	playwright	playwright	0.41	1	1	{'playwright': 0.41, 'poet': 0.1, 'writer': 0.1, 'dram': 0.04, 'author': 0.03}	0	0.412109	0	1	key	key|target	0.94	TRUE	TRUE	TRUE	target	{'playwright': 0.94}
Factual Knowledge	capital_world	Madagascar is to Antananarivo as China is to	beijing	Beijing	0.4	1	1	{'Beijing': 0.4, '______': 0.08, 'Shanghai': 0.04, '__': 0.04, '____': 0.02}	0	0.398438	0	1	key	key|target	0.94	TRUE	TRUE	TRUE	target	{'beijing': 0.94}
Factual Knowledge	capital_world	Stockholm is to Sweden as Suva is to	fiji	Fiji	0.38	1	1	{'Fiji': 0.38, '______': 0.06, '____': 0.05, 'what': 0.04, '__': 0.04}	0	0.384766	0	1	key	key|target	0.94	TRUE	TRUE	TRUE	target	{'fiji': 0.94}
Factual Knowledge	capital_world	London is to England as Muscat is to	oman	Oman	0.33	1	1	{'Oman': 0.33, '_____': 0.07, '______': 0.07, 'what': 0.06, '__': 0.06}	0	0.330078	0	1	key	key|target	0.94	TRUE	TRUE	TRUE	target	{'oman': 0.94}
Factual Knowledge	capital_world	Venezuela is to Caracas as England is to	london	London	0.33	1	1	{'London': 0.33, '______': 0.07, ':': 0.04, '__': 0.03}	0	0.328125	0	1	key	key|target	0.94	TRUE	TRUE	TRUE	target	{'london': 0.94}
Factual Knowledge	capital_world	Liberia is to Monrovia as Norway is to	oslo	Oslo	0.32	1	1	{'Oslo': 0.32, '______': 0.09, '__': 0.06, '____': 0.03, '___': 0.03}	0	0.324219	0	1	key	key|target	0.94	TRUE	TRUE	TRUE	target	{'oslo': 0.94}
Factual Knowledge	capital_world	Brussels is to Belgium as Khartoum is to	sudan	Sudan	0.31	1	1	{'Sudan': 0.31, 'what': 0.11, '__': 0.06, '______': 0.06, 'the': 0.05}	0	0.310547	0	1	key	key|target	0.94	TRUE	TRUE	TRUE	target	{'sudan': 0.94}
Factual Knowledge	capital_world	Helsinki is to Finland as Nicosia is to	cyprus	Cyprus	0.29	1	1	{'Cyprus': 0.29, 'which': 0.16, 'what': 0.12, '__': 0.04, '______': 0.04}	0	0.287109	0	1	key	key|target	0.94	TRUE	TRUE	TRUE	target	{'cyprus': 0.94}
Factual Knowledge	capital_world	Lusaka is to Zambia as Taipei is to	taiwan	Taiwan	0.27	1	1	{'Taiwan': 0.27, '__': 0.11, '______': 0.06, '_____': 0.04, ':': 0.04}	0	0.273438	0	1	key	key|target	0.94	TRUE	TRUE	TRUE	target	{'taiwan': 0.94}
Factual Knowledge	capital_world	Mali is to Bamako as Cuba is to	havana	:	0.26	0	1	{':': 0.07, 'Havana': 0.12, '______': 0.04}	1	0.124512	0.13916	0.99999	key	key|target	0.94	TRUE	TRUE	TRUE	target	{'havana': 0.94}
Factual Knowledge	capital_world	Niger is to Niamey as Iran is to	tehran	Tehran	0.25	1	1	{'Tehran': 0.25, '?': 0.05, '': 0.03, ':': 0.04}	0	0.25	0	1	key	key|target	0.94	TRUE	TRUE	TRUE	target	{'tehran': 0.94}
Factual Knowledge	capital_world	Azerbaijan is to Baku as Egypt is to	cairo	Cairo	0.22	1	1	{'Cairo': 0.22, ':': 0.06, '______': 0.05, '?': 0.05}	0	0.219727	0	1	key	key|target	0.94	TRUE	TRUE	TRUE	target	{'cairo': 0.94}
Factual Knowledge	capital_world	Australia is to Canberra as Egypt is to	cairo	Cairo	0.2	1	1	{'Cairo': 0.2, ':': 0.08, '?': 0.07, '__': 0.04}	0	0.195312	0	1	key	key|target	0.94	TRUE	TRUE	TRUE	target	{'cairo': 0.94}
Factual Knowledge	capital_world	Lithuania is to Vilnius as Egypt is to	cairo	Cairo	0.19	1	1	{'Cairo': 0.19, '______': 0.09, '__': 0.08, 'what': 0.06, ':': 0.06}	0	0.185547	0	1	key	key|target	0.94	TRUE	TRUE	TRUE	target	{'cairo': 0.94}
Factual Knowledge	capital_world	Mali is to Bamako as Syria is to	damascus	:	0.17	0	1	{':': 0.07, '?': 0.08, 'Damascus': 0.08, '__': 0.06}	2	0.0771484	0.0966797	0.99998	key	key|target	0.94	TRUE	TRUE	TRUE	target	{'damascus': 0.94}
Factual Knowledge	capital_world	Kampala is to Uganda as Kigali is to	rwanda	Rwanda	0.1	1	1	{'Rwanda': 0.1, 'which': 0.08, '__': 0.06, '______': 0.06, 'what': 0.06}	0	0.102539	0	1	key	key|target	0.94	TRUE	TRUE	TRUE	target	{'rwanda': 0.94}
Factual Knowledge	capital_world	Warsaw is to Poland as Asmara is to	eritrea	E	0.76	0.5	0.5	{'E': 0.76, 'Ethiopia': 0.03, 'what': 0.03, '______': 0.02, '__': 0.02}	31	0.00115204	0.760567	0.999691	key	key|target	0.94	TRUE	TRUE	TRUE	target	{'eritrea': 0.94}
Factual Knowledge	capital_world	Baku is to Azerbaijan as Georgetown is to	guyana	Guy	0.52	0.5	0.5	{'Guy': 0.52, 'the': 0.11, 'Washington': 0.09, 'Malaysia': 0.03, 'Georgetown': 0.02}	0	0.515625	0	1	key	key|target	0.94	TRUE	TRUE	TRUE	target	{'guyana': 0.94}
Factual Knowledge	capital_world	Ukraine is to Kiev as Macedonia is to	skopje	Sk	0.41	0.5	0.5	{'Sk': 0.41, '__': 0.1, '______': 0.08, 'what': 0.05, '____': 0.03}	0	0.408203	0	1	key	key|target	0.94	TRUE	TRUE	TRUE	target	{'skopje': 0.94}
Factual Knowledge	capital_world	Lithuania is to Vilnius as Eritrea is to	asmara	As	0.3	0.5	0.5	{'As': 0.3, '______': 0.09, '__': 0.08, 'what': 0.04, '?': 0.03}	0	0.302734	0	1	key	key|target	0.94	TRUE	TRUE	TRUE	target	{'asmara': 0.94}
Factual Knowledge	capital_world	Mozambique is to Maputo as Montenegro is to	podgorica	Pod	0.27	0.5	0.5	{'Pod': 0.27, '?': 0.04, '': 0.05, '__': 0.03}	0	0.265625	0	1	key	key|target	0.94	TRUE	TRUE	TRUE	target	{'podgorica': 0.94}
Factual Knowledge	capital_world	Vilnius is to Lithuania as Banjul is to	gambia	G	0.25	0.5	0.5	{'G': 0.25, 'The': 0.16, 'the': 0.15, 'what': 0.06, '?': 0.04}	67	0.000648499	0.245445	0.999332	key	key|target	0.94	TRUE	TRUE	TRUE	target	{'gambia': 0.94}
Factual Knowledge	capital_world	Tbilisi is to Georgia as Banjul is to	gambia	The	0.21	0	0.5	{'The': 0.21, 'G': 0.15, 'the': 0.14, 'what': 0.05, '__': 0.04}	76	0.000774384	0.204304	0.999243	key	key|target	0.94	TRUE	TRUE	TRUE	target	{'gambia': 0.94}
Factual Knowledge	capital_world	Apia is to Samoa as Funafuti is to	tuvalu	Tu	0.19	0.5	0.5	{'Tu': 0.19, '?': 0.03, 'what': 0.04, '___': 0.04}	0	0.194336	0	1	key	key|target	0.94	TRUE	TRUE	TRUE	target	{'tuvalu': 0.94}
Factual Knowledge	capital_world	Vientiane is to Laos as Banjul is to	gambia	G	0.18	0.5	0.5	{'G': 0.18, 'The': 0.16, 'the': 0.12, 'what': 0.06, '?': 0.05}	82	0.000530243	0.183064	0.999183	key	key|target	0.94	TRUE	TRUE	TRUE	target	{'gambia': 0.94}
Factual Knowledge	capital_world	Algiers is to Algeria as Banjul is to	gambia	G	0.18	0.5	0.5	{'G': 0.18, 'The': 0.17, 'the': 0.09, '?': 0.07, 'what': 0.07}	84	0.00069809	0.181919	0.999163	key	key|target	0.94	TRUE	TRUE	TRUE	target	{'gambia': 0.94}
Factual Knowledge	capital_world	Valletta is to Malta as Banjul is to	gambia	G	0.15	0.5	0.5	{'G': 0.15, 'The': 0.12, 'the': 0.12, '?': 0.07, 'what': 0.06}	98	0.000514984	0.145969	0.999023	key	key|target	0.94	TRUE	TRUE	TRUE	target	{'gambia': 0.94}
Factual Knowledge	capital_world	Kenya is to Nairobi as Macedonia is to	skopje	Sk	0.13	0.5	0.5	{'Sk': 0.13, '______': 0.08, '__': 0.07, ':': 0.07, 'what': 0.06}	0	0.131836	0	1	key	key|target	0.94	TRUE	TRUE	TRUE	target	{'skopje': 0.94}
Factual Knowledge	capital_world	Nepal is to Kathmandu as Mauritania is to	nouakchott	__	0.12	0	0.5	{'__': 0.12, '______': 0.08, 'Nou': 0.07, '"': 0.06, ':': 0.05}	2	0.0664062	0.0581055	0.99998	key	key|target	0.94	TRUE	TRUE	TRUE	target	{'nouakchott': 0.94}
Factual Knowledge	capital_world	Uruguay is to Montevideo as Latvia is to	riga	R	0.11	0.5	0.5	{'R': 0.11, '______': 0.07, '"': 0.06, 'what': 0.04, ':': 0.04}	235	0.000208855	0.106236	0.997658	key	key|target	0.94	TRUE	TRUE	TRUE	target	{'riga': 0.94}
Factual Knowledge	capital_world	Ghana is to Accra as Jordan is to	amman	?	0.08	0	0.5	{'?': 0.07, 'Am': 0.07, ':': 0.06, '______': 0.05}	1	0.0712891	0.00927734	0.99999	key	key|target	0.94	TRUE	TRUE	TRUE	target	{'amman': 0.94}
Factual Knowledge	capital_world	Mozambique is to Maputo as Georgia is to	tbilisi	Atlanta	0.37	0	0	{'Atlanta': 0.37, '______': 0.04, '__': 0.04, '?': 0.04, ':': 0.03}	243	0.000102043	0.370992	0.997579	key	key|target	0.94	TRUE	TRUE	TRUE	target	{'tbilisi': 0.94}
Factual Knowledge	country_capital	Australia is to Canberra as Georgia is to	tbilisi	Atlanta	0.14	0	0	{'Atlanta': 0.14, '?"': 0.06, '?': 0.08, ':': 0.07}	413	3.40939e-05	0.143521	0.995884	key	key|target	0.94	TRUE	TRUE	TRUE	target	{'tbilisi': 0.94}
Factual Knowledge	country_capital	Conakry is to Guinea as Tehran is to	iran	Iran	0.94	1	1	{'Iran': 0.94, '__': 0.0, 'what': 0.0, 'Pers': 0.0, '______': 0.0}	0	0.9375	0	1	key	key|target	0.93	TRUE	TRUE	TRUE	target	{'iran': 0.93}
Factual Knowledge	country_capital	Jakarta is to Indonesia as Lisbon is to	portugal	Portugal	0.94	1	1	{'Portugal': 0.94, 'Brazil': 0.01, '': 0.01, 'the': 0.01, 'Europe': 0.0}	0	0.941406	0	1	key	key|target	0.93	TRUE	TRUE	TRUE	target	{'portugal': 0.93}
Factual Knowledge	capital_world	Jakarta is to Indonesia as Lisbon is to	portugal	Portugal	0.94	1	1	{'Portugal': 0.94, 'Brazil': 0.01, '': 0.01, 'the': 0.01, 'Europe': 0.0}	0	0.941406	0	1	key	key|target	0.93	TRUE	TRUE	TRUE	target	{'portugal': 0.93}
Factual Knowledge	capital_world	Yerevan is to Armenia as Bern is to	switzerland	Switzerland	0.89	1	1	{'Switzerland': 0.89, 'which': 0.01, '__': 0.01, 'what': 0.01, '______': 0.01}	0	0.886719	0	1	key	key|target	0.93	TRUE	TRUE	TRUE	target	{'switzerland': 0.93}
Factual Knowledge	country_capital	Islamabad is to Pakistan as Madrid is to	spain	Spain	0.84	1	1	{'Spain': 0.84, '______': 0.03, 'what': 0.02, '__': 0.01, 'which': 0.01}	0	0.84375	0	1	key	key|target	0.93	TRUE	TRUE	TRUE	target	{'spain': 0.93}
Factual Knowledge	capital_world	Islamabad is to Pakistan as Madrid is to	spain	Spain	0.84	1	1	{'Spain': 0.84, '______': 0.03, 'what': 0.02, '__': 0.01, 'which': 0.01}	0	0.84375	0	1	key	key|target	0.93	TRUE	TRUE	TRUE	target	{'spain': 0.93}
Factual Knowledge	capital_world	Kingston is to Jamaica as Montevideo is to	uruguay	Uruguay	0.8	1	1	{'Uruguay': 0.8, 'what': 0.04, 'which': 0.02, '______': 0.01, '__': 0.01}	0	0.804688	0	1	key	key|target	0.93	TRUE	TRUE	TRUE	target	{'uruguay': 0.93}
Factual Knowledge	capital_world	Algiers is to Algeria as Baghdad is to	iraq	Iraq	0.79	1	1	{'Iraq': 0.79, '______': 0.03, '__': 0.02, 'what': 0.02, '_____': 0.01}	0	0.792969	0	1	key	key|target	0.93	TRUE	TRUE	TRUE	target	{'iraq': 0.93}
Factual Knowledge	capital_world	Manama is to Bahrain as Tegucigalpa is to	honduras	Honduras	0.78	1	1	{'Honduras': 0.78, 'what': 0.06, '______': 0.02, '__': 0.02, 'which': 0.01}	0	0.78125	0	1	key	key|target	0.93	TRUE	TRUE	TRUE	target	{'honduras': 0.93}
Factual Knowledge	capital_world	Islamabad is to Pakistan as Cairo is to	egypt	Egypt	0.78	1	1	{'Egypt': 0.78, '______': 0.02, 'what': 0.02, '__': 0.02, ':': 0.02}	0	0.78125	0	1	key	key|target	0.93	TRUE	TRUE	TRUE	target	{'egypt': 0.93}
Factual Knowledge	capital_world	Antananarivo is to Madagascar as Bratislava is to	slovakia	Slovakia	0.74	1	1	{'Slovakia': 0.74, 'what': 0.05, 'the': 0.03, '______': 0.02, '__': 0.02}	0	0.738281	0	1	key	key|target	0.93	TRUE	TRUE	TRUE	target	{'slovakia': 0.93}
Factual Knowledge	capital_world	Tirana is to Albania as Bern is to	switzerland	Switzerland	0.72	1	1	{'Switzerland': 0.72, 'what': 0.02, 'which': 0.02, '?': 0.02, '______': 0.02}	0	0.71875	0	1	key	key|target	0.93	TRUE	TRUE	TRUE	target	{'switzerland': 0.93}
Factual Knowledge	capital_world	Accra is to Ghana as Bratislava is to	slovakia	Slovakia	0.71	1	1	{'Slovakia': 0.71, 'the': 0.05, 'what': 0.03, '______': 0.02, '__': 0.02}	0	0.707031	0	1	key	key|target	0.93	TRUE	TRUE	TRUE	target	{'slovakia': 0.93}
Factual Knowledge	name_occupation	balzac is to novelist as depp is to	actor	actor	0.7	1	1	{'actor': 0.7, 'movie': 0.02, '...': 0.01, 'film': 0.01, 'what': 0.01}	0	0.703125	0	1	key	key|target	0.93	TRUE	TRUE	TRUE	target	{'actor': 0.93}
Factual Knowledge	capital_world	Managua is to Nicaragua as Nassau is to	bahamas	the	0.68	0	1	{'the': 0.68, 'The': 0.19, 'Bahamas': 0.02, '___': 0.01, '__': 0.01}	2	0.0224609	0.65332	0.99998	key	key|target	0.93	TRUE	TRUE	TRUE	target	{'bahamas': 0.93}
Factual Knowledge	capital_world	Tunis is to Tunisia as Bucharest is to	romania	Romania	0.68	1	1	{'Romania': 0.68, 'what': 0.04, '______': 0.03, 'which': 0.02, '__': 0.02}	0	0.683594	0	1	key	key|target	0.93	TRUE	TRUE	TRUE	target	{'romania': 0.93}
Factual Knowledge	capital_world	Caracas is to Venezuela as Lima is to	peru	Peru	0.68	1	1	{'Peru': 0.68, '______': 0.05, 'what': 0.04, '__': 0.03, '?': 0.02}	0	0.675781	0	1	key	key|target	0.93	TRUE	TRUE	TRUE	target	{'peru': 0.93}
Factual Knowledge	capital_world	Madagascar is to Antananarivo as Belgium is to	brussels	Brussels	0.68	1	1	{'Brussels': 0.68, '______': 0.05, '__': 0.02, 'what': 0.01, ':': 0.01}	0	0.683594	0	1	key	key|target	0.93	TRUE	TRUE	TRUE	target	{'brussels': 0.93}
Factual Knowledge	capital_world	Kabul is to Afghanistan as Bern is to	switzerland	Switzerland	0.65	1	1	{'Switzerland': 0.65, 'what': 0.03, '__': 0.03, '______': 0.02, 'which': 0.02}	0	0.652344	0	1	key	key|target	0.93	TRUE	TRUE	TRUE	target	{'switzerland': 0.93}
Factual Knowledge	capital_world	Montevideo is to Uruguay as Riga is to	latvia	Latvia	0.55	1	1	{'Latvia': 0.55, 'which': 0.07, 'what': 0.06, ':': 0.03, '?': 0.03}	0	0.554688	0	1	key	key|target	0.93	TRUE	TRUE	TRUE	target	{'latvia': 0.93}
Factual Knowledge	capital_world	Caracas is to Venezuela as Kingston is to	jamaica	Jamaica	0.49	1	1	{'Jamaica': 0.49, '__': 0.05, '______': 0.05, 'what': 0.04, ':': 0.04}	0	0.486328	0	1	key	key|target	0.93	TRUE	TRUE	TRUE	target	{'jamaica': 0.93}
Factual Knowledge	capital_world	Bishkek is to Kyrgyzstan as Lima is to	peru	Peru	0.46	1	1	{'Peru': 0.46, ':': 0.08, '______': 0.05, '__': 0.05, 'what': 0.04}	0	0.464844	0	1	key	key|target	0.93	TRUE	TRUE	TRUE	target	{'peru': 0.93}
Factual Knowledge	country_capital	Ukraine is to Kiev as Peru is to	lima	Lima	0.41	1	1	{'Lima': 0.41, '______': 0.07, '__': 0.07, 'C': 0.04, ':': 0.03}	0	0.40625	0	1	key	key|target	0.93	TRUE	TRUE	TRUE	target	{'lima': 0.93}
Factual Knowledge	capital_world	Ukraine is to Kiev as Peru is to	lima	Lima	0.41	1	1	{'Lima': 0.41, '______': 0.07, '__': 0.07, 'C': 0.04, ':': 0.03}	0	0.40625	0	1	key	key|target	0.93	TRUE	TRUE	TRUE	target	{'lima': 0.93}
Factual Knowledge	capital_world	Montevideo is to Uruguay as Skopje is to	macedonia	what	0.3	0	1	{'what': 0.3, 'Macedonia': 0.15, 'which': 0.09, '__': 0.04, '______': 0.03}	1	0.149414	0.147461	0.99999	key	key|target	0.93	TRUE	TRUE	TRUE	target	{'macedonia': 0.93}
Factual Knowledge	capital_world	Monrovia is to Liberia as Tripoli is to	libya	Libya	0.3	1	1	{'Libya': 0.3, ':': 0.08, 'what': 0.07, '__': 0.05, '___': 0.05}	0	0.296875	0	1	key	key|target	0.93	TRUE	TRUE	TRUE	target	{'libya': 0.93}
Factual Knowledge	capital_world	Paramaribo is to Suriname as Ankara is to	turkey	Turkey	0.25	1	1	{'Turkey': 0.25, 'what': 0.18, 'which': 0.08, '______': 0.08, '__': 0.08}	0	0.246094	0	1	key	key|target	0.93	TRUE	TRUE	TRUE	target	{'turkey': 0.93}
Factual Knowledge	capital_world	Uzbekistan is to Tashkent as Iran is to	tehran	Tehran	0.23	1	1	{'Tehran': 0.23, 'what': 0.04, '': 0.04, ':': 0.04, '?': 0.04}	0	0.225586	0	1	key	key|target	0.93	TRUE	TRUE	TRUE	target	{'tehran': 0.93}
Factual Knowledge	capital_world	Honduras is to Tegucigalpa as China is to	beijing	Beijing	0.22	1	1	{'Beijing': 0.22, '______': 0.12, '__': 0.07, 'what': 0.04, '___': 0.03}	0	0.222656	0	1	key	key|target	0.93	TRUE	TRUE	TRUE	target	{'beijing': 0.93}
Factual Knowledge	capital_world	Uruguay is to Montevideo as Japan is to	tokyo	Tokyo	0.2	1	1	{'Tokyo': 0.2, '______': 0.09, '__': 0.05, '____': 0.04, ':': 0.03}	0	0.200195	0	1	key	key|target	0.93	TRUE	TRUE	TRUE	target	{'tokyo': 0.93}
Factual Knowledge	country_language	Bolivia is to Spanish as Iran is to	persian	F	0.17	0	1	{'F': 0.17, 'Arabic': 0.14, 'Persian': 0.13, '______': 0.1, '_____': 0.06}	2	0.131836	0.0371094	0.99998	key	key|target	0.93	TRUE	TRUE	TRUE	target	{'persian': 0.93}
Factual Knowledge	country_language	Colombia is to Spanish as Iran is to	persian	F	0.14	0	1	{'F': 0.14, 'Persian': 0.14, 'Arabic': 0.13, '______': 0.12, '_____': 0.04}	1	0.135742	0.00878906	0.99999	key	key|target	0.93	TRUE	TRUE	TRUE	target	{'persian': 0.93}
Factual Knowledge	capital_world	Vilnius is to Lithuania as Windhoek is to	namibia	Nam	0.75	0.5	0.5	{'Nam': 0.75, 'which': 0.06, 'what': 0.04, '__': 0.02, '______': 0.02}	0	0.75	0	1	key	key|target	0.93	TRUE	TRUE	TRUE	target	{'namibia': 0.93}
Factual Knowledge	capital_world	Caracas is to Venezuela as Georgetown is to	guyana	Guy	0.71	0.5	0.5	{'Guy': 0.71, 'British': 0.03, 'what': 0.03, '______': 0.03, 'the': 0.02}	0	0.714844	0	1	key	key|target	0.93	TRUE	TRUE	TRUE	target	{'guyana': 0.93}
Factual Knowledge	capital_world	Ukraine is to Kiev as Cyprus is to	nicosia	N	0.48	0.5	0.5	{'N': 0.48, '__': 0.11, 'Lim': 0.03, '______': 0.03, 'L': 0.03}	110	0.000208855	0.482213	0.998904	key	key|target	0.93	TRUE	TRUE	TRUE	target	{'nicosia': 0.93}
Factual Knowledge	capital_world	Mozambique is to Maputo as Macedonia is to	skopje	Sk	0.41	0.5	0.5	{'Sk': 0.41, '______': 0.05, '__': 0.04, 'what': 0.04, '': 0.03}	0	0.40625	0	1	key	key|target	0.93	TRUE	TRUE	TRUE	target	{'skopje': 0.93}
Factual Knowledge	capital_world	Ukraine is to Kiev as Liberia is to	monrovia	Mon	0.35	0.5	0.5	{'Mon': 0.35, '__': 0.15, '______': 0.11, '____': 0.06, ':': 0.02}	0	0.349609	0	1	key	key|target	0.93	TRUE	TRUE	TRUE	target	{'monrovia': 0.93}
Factual Knowledge	capital_world	Lithuania is to Vilnius as Nigeria is to	abuja	Abu	0.34	0.5	0.5	{'Abu': 0.34, 'Lagos': 0.08, '______': 0.08, '__': 0.06, 'what': 0.04}	0	0.34375	0	1	key	key|target	0.93	TRUE	TRUE	TRUE	target	{'abuja': 0.93}
Factual Knowledge	capital_world	Mozambique is to Maputo as Latvia is to	riga	R	0.32	0.5	0.5	{'R': 0.32, ':': 0.04, '______': 0.04, '__': 0.03, '': 0.03}	112	0.000713348	0.315693	0.998884	key	key|target	0.93	TRUE	TRUE	TRUE	target	{'riga': 0.93}
Factual Knowledge	capital_world	Baku is to Azerbaijan as Bishkek is to	kyrgyzstan	Ky	0.3	0.5	0.5	{'Ky': 0.3, 'what': 0.1, '__': 0.05, 'which': 0.04, '___': 0.04}	0	0.298828	0	1	key	key|target	0.93	TRUE	TRUE	TRUE	target	{'kyrgyzstan': 0.93}
Factual Knowledge	capital_world	Vienna is to Austria as Asmara is to	eritrea	E	0.26	0.5	0.5	{'E': 0.26, 'what': 0.16, '__': 0.06, '?': 0.05, 'which': 0.05}	41	0.00209045	0.255722	0.999591	key	key|target	0.93	TRUE	TRUE	TRUE	target	{'eritrea': 0.93}
Factual Knowledge	capital_world	Lithuania is to Vilnius as Jordan is to	amman	Am	0.25	0.5	0.5	{'Am': 0.25, '__': 0.12, '______': 0.12, 'what': 0.05, '_': 0.03}	0	0.249023	0	1	key	key|target	0.93	TRUE	TRUE	TRUE	target	{'amman': 0.93}
Factual Knowledge	capital_world	Afghanistan is to Kabul as Vietnam is to	hanoi	H	0.21	0.5	0.5	{'H': 0.21, 'Ho': 0.09, 'Sa': 0.07, '______': 0.06, '__': 0.05}	54	0.00148773	0.212379	0.999462	key	key|target	0.93	TRUE	TRUE	TRUE	target	{'hanoi': 0.93}
Factual Knowledge	capital_world	Venezuela is to Caracas as Sudan is to	khartoum	Kh	0.14	0.5	0.5	{'Kh': 0.14, ':': 0.06, '__': 0.07, 'what': 0.07}	0	0.137695	0	1	key	key|target	0.93	TRUE	TRUE	TRUE	target	{'khartoum': 0.93}
Factual Knowledge	capital_world	Malta is to Valletta as Eritrea is to	asmara	?	0.1	0	0.5	{'?': 0.05, '?"': 0.09, 'As': 0.08, '"': 0.04}	2	0.0839844	0.0170898	0.99998	key	key|target	0.93	TRUE	TRUE	TRUE	target	{'asmara': 0.93}
Factual Knowledge	capital_world	Kyrgyzstan is to Bishkek as Romania is to	bucharest	:	0.1	0	0.5	{':': 0.07, '': 0.06, 'Buch': 0.08}	2	0.0810547	0.0229492	0.99998	key	key|target	0.93	TRUE	TRUE	TRUE	target	{'bucharest': 0.93}
Factual Knowledge	capital_world	Nepal is to Kathmandu as Oman is to	muscat	:	0.06	0	0.5	{':': 0.06, '__': 0.06, '____': 0.05, '______': 0.05, 'Mus': 0.05}	4	0.0493164	0.0141602	0.99996	key	key|target	0.93	TRUE	TRUE	TRUE	target	{'muscat': 0.93}
Factual Knowledge	capital_world	London is to England as Nassau is to	bahamas	the	0.38	0	0	{'the': 0.38, 'The': 0.13, 'what': 0.05, '______': 0.04, '__': 0.03}	5	0.0327148	0.342285	0.99995	key	key|target	0.93	TRUE	TRUE	TRUE	target	{'bahamas': 0.93}
Factual Knowledge	capital_world	Sudan is to Khartoum as Norway is to	oslo	______	0.12	0	0	{'______': 0.12, '?': 0.07, '__': 0.06, 'what': 0.06}	5	0.0583496	0.0578613	0.99995	key	key|target	0.93	TRUE	TRUE	TRUE	target	{'oslo': 0.93}
Factual Knowledge	country_capital	Berlin is to Germany as Kingston is to	jamaica	Jamaica	0.95	1	1	{'Jamaica': 0.95, 'Canada': 0.01, 'England': 0.0, 'the': 0.0, '______': 0.0}	0	0.945312	0	1	key	key|target	0.92	TRUE	TRUE	TRUE	target	{'jamaica': 0.92}
Factual Knowledge	capital_world	Algiers is to Algeria as Canberra is to	australia	Australia	0.95	1	1	{'Australia': 0.95, '______': 0.01, '__': 0.01, 'the': 0.0, 'what': 0.0}	0	0.949219	0	1	key	key|target	0.92	TRUE	TRUE	TRUE	target	{'australia': 0.92}
Factual Knowledge	capital_world	Berlin is to Germany as Kingston is to	jamaica	Jamaica	0.95	1	1	{'Jamaica': 0.95, 'Canada': 0.01, 'England': 0.0, 'the': 0.0, '______': 0.0}	0	0.945312	0	1	key	key|target	0.92	TRUE	TRUE	TRUE	target	{'jamaica': 0.92}
Factual Knowledge	capital_world	Helsinki is to Finland as Havana is to	cuba	Cuba	0.94	1	1	{'Cuba': 0.94, '______': 0.01, '': 0.0, 'the': 0.0, '__': 0.0}	0	0.9375	0	1	key	key|target	0.92	TRUE	TRUE	TRUE	target	{'cuba': 0.92}
Factual Knowledge	capital_world	Algiers is to Algeria as Copenhagen is to	denmark	Denmark	0.93	1	1	{'Denmark': 0.93, '__': 0.01, 'Scandin': 0.01, '______': 0.0, 'the': 0.0}	0	0.925781	0	1	key	key|target	0.92	TRUE	TRUE	TRUE	target	{'denmark': 0.92}
Factual Knowledge	capital_world	Helsinki is to Finland as Bangkok is to	thailand	Thailand	0.93	1	1	{'Thailand': 0.93, 'what': 0.01, '______': 0.0, '__': 0.0, '_____': 0.0}	0	0.929688	0	1	key	key|target	0.92	TRUE	TRUE	TRUE	target	{'thailand': 0.92}
Factual Knowledge	country_capital	Beirut is to Lebanon as Copenhagen is to	denmark	Denmark	0.88	1	1	{'Denmark': 0.88, 'Scandin': 0.03, '__': 0.01, '______': 0.01, 'Sweden': 0.01}	0	0.882812	0	1	key	key|target	0.92	TRUE	TRUE	TRUE	target	{'denmark': 0.92}
Factual Knowledge	capital_world	Minsk is to Belarus as Tripoli is to	libya	Libya	0.88	1	1	{'Libya': 0.88, 'what': 0.01, '______': 0.01, '__': 0.01, ':': 0.01}	0	0.875	0	1	key	key|target	0.92	TRUE	TRUE	TRUE	target	{'libya': 0.92}
Factual Knowledge	capital_world	Beirut is to Lebanon as Copenhagen is to	denmark	Denmark	0.88	1	1	{'Denmark': 0.88, 'Scandin': 0.03, '__': 0.01, '______': 0.01, 'Sweden': 0.01}	0	0.882812	0	1	key	key|target	0.92	TRUE	TRUE	TRUE	target	{'denmark': 0.92}
Factual Knowledge	capital_world	Nicosia is to Cyprus as Tegucigalpa is to	honduras	Honduras	0.84	1	1	{'Honduras': 0.84, 'what': 0.04, '______': 0.02, '__': 0.02, '': 0.01}	0	0.839844	0	1	key	key|target	0.92	TRUE	TRUE	TRUE	target	{'honduras': 0.92}
Factual Knowledge	country_capital	Conakry is to Guinea as Ottawa is to	canada	Canada	0.81	1	1	{'Canada': 0.81, '__': 0.04, '______': 0.03, '': 0.01, '____': 0.01}	0	0.8125	0	1	key	key|target	0.92	TRUE	TRUE	TRUE	target	{'canada': 0.92}
Factual Knowledge	capital_world	Antananarivo is to Madagascar as Bucharest is to	romania	Romania	0.81	1	1	{'Romania': 0.81, 'what': 0.02, '______': 0.01, '__': 0.01, ':': 0.01}	0	0.808594	0	1	key	key|target	0.92	TRUE	TRUE	TRUE	target	{'romania': 0.92}
Factual Knowledge	capital_world	Tashkent is to Uzbekistan as Vienna is to	austria	Austria	0.8	1	1	{'Austria': 0.8, 'what': 0.02, '______': 0.02, '__': 0.02, 'the': 0.01}	0	0.800781	0	1	key	key|target	0.92	TRUE	TRUE	TRUE	target	{'austria': 0.92}
Factual Knowledge	capital_world	Kathmandu is to Nepal as Kingston is to	jamaica	Jamaica	0.69	1	1	{'Jamaica': 0.69, '__': 0.05, '______': 0.03, 'what': 0.02, 'which': 0.01}	0	0.6875	0	1	key	key|target	0.92	TRUE	TRUE	TRUE	target	{'jamaica': 0.92}
Factual Knowledge	country_capital	Dhaka is to Bangladesh as Dublin is to	ireland	Ireland	0.68	1	1	{'Ireland': 0.68, '______': 0.06, 'the': 0.04, '__': 0.03, 'what': 0.02}	0	0.675781	0	1	key	key|target	0.92	TRUE	TRUE	TRUE	target	{'ireland': 0.92}
Factual Knowledge	capital_world	Dhaka is to Bangladesh as Dublin is to	ireland	Ireland	0.68	1	1	{'Ireland': 0.68, '______': 0.06, 'the': 0.04, '__': 0.03, 'what': 0.02}	0	0.675781	0	1	key	key|target	0.92	TRUE	TRUE	TRUE	target	{'ireland': 0.92}
Factual Knowledge	country_language	Kosovo is to Albanian as Netherlands is to	dutch	Dutch	0.65	1	1	{'Dutch': 0.65, '': 0.02, 'Flem': 0.02, 'what': 0.01, 'N': 0.01}	0	0.652344	0	1	key	key|target	0.92	TRUE	TRUE	TRUE	target	{'dutch': 0.92}
Factual Knowledge	capital_world	Bishkek is to Kyrgyzstan as Lisbon is to	portugal	Portugal	0.62	1	1	{'Portugal': 0.62, '__': 0.05, '______': 0.05, 'what': 0.05, 'which': 0.04}	0	0.621094	0	1	key	key|target	0.92	TRUE	TRUE	TRUE	target	{'portugal': 0.92}
Factual Knowledge	country_language	Fiji is to English as Netherlands is to	dutch	Dutch	0.61	1	1	{'Dutch': 0.61, '______': 0.04, 'Holland': 0.02, '__': 0.01, 'Flem': 0.01}	0	0.605469	0	1	key	key|target	0.92	TRUE	TRUE	TRUE	target	{'dutch': 0.92}
Factual Knowledge	capital_world	Ljubljana is to Slovenia as Nassau is to	bahamas	the	0.61	0	1	{'the': 0.61, 'The': 0.18, 'Bahamas': 0.02, 'what': 0.02, 'Bermuda': 0.01}	2	0.019043	0.594238	0.99998	key	key|target	0.92	TRUE	TRUE	TRUE	target	{'bahamas': 0.92}
Factual Knowledge	capital_world	Tashkent is to Uzbekistan as Tunis is to	tunisia	Tunisia	0.61	1	1	{'Tunisia': 0.61, '__': 0.05, 'what': 0.03, '______': 0.03, ':': 0.02}	0	0.605469	0	1	key	key|target	0.92	TRUE	TRUE	TRUE	target	{'tunisia': 0.92}
Factual Knowledge	capital_world	Stockholm is to Sweden as Hanoi is to	vietnam	Vietnam	0.61	1	1	{'Vietnam': 0.61, 'Viet': 0.08, '______': 0.07, '__': 0.03, 'what': 0.03}	0	0.613281	0	1	key	key|target	0.92	TRUE	TRUE	TRUE	target	{'vietnam': 0.92}
Factual Knowledge	country_capital	Baghdad is to Iraq as Hanoi is to	vietnam	Vietnam	0.6	1	1	{'Vietnam': 0.6, '______': 0.09, '__': 0.04, 'Viet': 0.03, 'what': 0.03}	0	0.601562	0	1	key	key|target	0.92	TRUE	TRUE	TRUE	target	{'vietnam': 0.92}
Factual Knowledge	capital_world	Baghdad is to Iraq as Hanoi is to	vietnam	Vietnam	0.6	1	1	{'Vietnam': 0.6, '______': 0.09, '__': 0.04, 'Viet': 0.03, 'what': 0.03}	0	0.601562	0	1	key	key|target	0.92	TRUE	TRUE	TRUE	target	{'vietnam': 0.92}
Factual Knowledge	capital_world	Kathmandu is to Nepal as Quito is to	ecuador	Ecuador	0.56	1	1	{'Ecuador': 0.56, '______': 0.09, '__': 0.08, 'what': 0.05, '_____': 0.02}	0	0.5625	0	1	key	key|target	0.92	TRUE	TRUE	TRUE	target	{'ecuador': 0.92}
Factual Knowledge	capital_world	Tashkent is to Uzbekistan as Tripoli is to	libya	Libya	0.49	1	1	{'Libya': 0.49, 'what': 0.06, ':': 0.04, '___': 0.03, 'which': 0.03}	0	0.486328	0	1	key	key|target	0.92	TRUE	TRUE	TRUE	target	{'libya': 0.92}
Factual Knowledge	capital_world	Helsinki is to Finland as Kigali is to	rwanda	Rwanda	0.48	1	1	{'Rwanda': 0.48, 'what': 0.05, '______': 0.05, '__': 0.04, 'Bur': 0.03}	0	0.476562	0	1	key	key|target	0.92	TRUE	TRUE	TRUE	target	{'rwanda': 0.92}
Factual Knowledge	capital_world	Azerbaijan is to Baku as Cuba is to	havana	Havana	0.48	1	1	{'Havana': 0.48, '______': 0.06, ':': 0.06, '__': 0.05, '': 0.03}	0	0.482422	0	1	key	key|target	0.92	TRUE	TRUE	TRUE	target	{'havana': 0.92}
Factual Knowledge	name_occupation	hegel is to philosopher as shakespeare is to	playwright	playwright	0.44	1	1	{'playwright': 0.44, 'writer': 0.13, 'poet': 0.07, 'author': 0.04, 'dram': 0.04}	0	0.443359	0	1	key	key|target	0.92	TRUE	TRUE	TRUE	target	{'playwright': 0.92}
Factual Knowledge	capital_world	Stockholm is to Sweden as Islamabad is to	pakistan	Pakistan	0.37	1	1	{'Pakistan': 0.37, '______': 0.11, '__': 0.05, '?': 0.05, 'what': 0.04}	0	0.373047	0	1	key	key|target	0.92	TRUE	TRUE	TRUE	target	{'pakistan': 0.92}
Factual Knowledge	capital_world	Helsinki is to Finland as Muscat is to	oman	Oman	0.36	1	1	{'Oman': 0.36, 'which': 0.06, '?': 0.05, '_____': 0.04, '__': 0.04}	0	0.355469	0	1	key	key|target	0.92	TRUE	TRUE	TRUE	target	{'oman': 0.92}
Factual Knowledge	capital_world	Antananarivo is to Madagascar as Astana is to	kazakhstan	Kazakhstan	0.35	1	1	{'Kazakhstan': 0.35, 'which': 0.11, 'what': 0.1, '?': 0.07, '__': 0.03}	0	0.347656	0	1	key	key|target	0.92	TRUE	TRUE	TRUE	target	{'kazakhstan': 0.92}
Factual Knowledge	country_capital	Kabul is to Afghanistan as Taipei is to	taiwan	Taiwan	0.34	1	1	{'Taiwan': 0.34, '__': 0.07, '______': 0.07, 'China': 0.06, '_____': 0.03}	0	0.34375	0	1	key	key|target	0.92	TRUE	TRUE	TRUE	target	{'taiwan': 0.92}
Factual Knowledge	capital_world	Tirana is to Albania as Astana is to	kazakhstan	Kazakhstan	0.34	1	1	{'Kazakhstan': 0.34, 'which': 0.12, 'what': 0.09, '?': 0.08, '__': 0.04}	0	0.339844	0	1	key	key|target	0.92	TRUE	TRUE	TRUE	target	{'kazakhstan': 0.92}
Factual Knowledge	capital_world	Greenland is to Nuuk as Iran is to	tehran	Tehran	0.33	1	1	{'Tehran': 0.33, '___': 0.04, '____': 0.04, '______': 0.04, '__': 0.04}	0	0.330078	0	1	key	key|target	0.92	TRUE	TRUE	TRUE	target	{'tehran': 0.92}
Factual Knowledge	capital_world	Warsaw is to Poland as Abuja is to	nigeria	Nigeria	0.32	1	1	{'Nigeria': 0.32, '______': 0.09, 'which': 0.07, 'what': 0.05, '__': 0.05}	0	0.322266	0	1	key	key|target	0.92	TRUE	TRUE	TRUE	target	{'nigeria': 0.92}
Factual Knowledge	capital_world	Yerevan is to Armenia as Ankara is to	turkey	Turkey	0.32	1	1	{'Turkey': 0.32, '__': 0.13, '______': 0.11, 'what': 0.06, 'which': 0.04}	0	0.322266	0	1	key	key|target	0.92	TRUE	TRUE	TRUE	target	{'turkey': 0.92}
Factual Knowledge	capital_world	Caracas is to Venezuela as Kigali is to	rwanda	Rwanda	0.28	1	1	{'Rwanda': 0.28, 'Bur': 0.08, '__': 0.07, 'what': 0.06, '______': 0.05}	0	0.279297	0	1	key	key|target	0.92	TRUE	TRUE	TRUE	target	{'rwanda': 0.92}
Factual Knowledge	capital_world	Madagascar is to Antananarivo as Thailand is to	bangkok	Bangkok	0.26	1	1	{'Bangkok': 0.26, '______': 0.07, '__': 0.07, 'what': 0.04, '_____': 0.04}	0	0.259766	0	1	key	key|target	0.92	TRUE	TRUE	TRUE	target	{'bangkok': 0.92}
Factual Knowledge	capital_world	Paris is to France as Oslo is to	norway	Norway	0.25	1	1	{'Norway': 0.25, 'what': 0.14, 'which': 0.08, '______': 0.04, 'A': 0.04}	0	0.248047	0	1	key	key|target	0.92	TRUE	TRUE	TRUE	target	{'norway': 0.92}
Factual Knowledge	capital_world	Uruguay is to Montevideo as Taiwan is to	taipei	Taipei	0.25	1	1	{'Taipei': 0.25, '______': 0.15, '__': 0.11, '____': 0.05, '___': 0.05}	0	0.253906	0	1	key	key|target	0.92	TRUE	TRUE	TRUE	target	{'taipei': 0.92}
Factual Knowledge	capital_world	Montevideo is to Uruguay as Sofia is to	bulgaria	what	0.21	0	1	{'what': 0.21, 'Bulgaria': 0.18, 'which': 0.09, '______': 0.06, ':': 0.05}	1	0.175781	0.0292969	0.99999	key	key|target	0.92	TRUE	TRUE	TRUE	target	{'bulgaria': 0.92}
Factual Knowledge	capital_world	Tallinn is to Estonia as Astana is to	kazakhstan	Kazakhstan	0.2	1	1	{'Kazakhstan': 0.2, 'which': 0.18, '?': 0.15, 'what': 0.14, '__': 0.05}	0	0.195312	0	1	key	key|target	0.92	TRUE	TRUE	TRUE	target	{'kazakhstan': 0.92}
Factual Knowledge	capital_world	Ottawa is to Canada as Abuja is to	nigeria	Nigeria	0.18	1	1	{'Nigeria': 0.18, '______': 0.13, '____': 0.08, '__': 0.07, 'which': 0.06}	0	0.177734	0	1	key	key|target	0.92	TRUE	TRUE	TRUE	target	{'nigeria': 0.92}
Factual Knowledge	capital_world	Chile is to Santiago as Thailand is to	bangkok	Bangkok	0.17	1	1	{'Bangkok': 0.17, '______': 0.09, '_____': 0.07, '__': 0.07, '____': 0.04}	0	0.168945	0	1	key	key|target	0.92	TRUE	TRUE	TRUE	target	{'bangkok': 0.92}
Factual Knowledge	capital_world	Slovenia is to Ljubljana as Norway is to	oslo	what	0.15	0	1	{'what': 0.15, '?': 0.09, 'Oslo': 0.05, '______': 0.05}	4	0.0537109	0.0917969	0.99996	key	key|target	0.92	TRUE	TRUE	TRUE	target	{'oslo': 0.92}
Factual Knowledge	name_occupation	spinoza is to philosopher as strauss is to	composer	political	0.14	0	1	{'political': 0.14, 'musician': 0.12, 'composer': 0.1, 'philosopher': 0.08, 'politician': 0.05}	2	0.103027	0.0375977	0.99998	key	key|target	0.92	TRUE	TRUE	TRUE	target	{'composer': 0.92}
Factual Knowledge	country_capital	Afghanistan is to Kabul as Iran is to	tehran	Tehran	0.14	1	1	{'Tehran': 0.14, ':': 0.06, '': 0.05, '?': 0.05, 'what': 0.05}	0	0.135742	0	1	key	key|target	0.92	TRUE	TRUE	TRUE	target	{'tehran': 0.92}
Factual Knowledge	capital_world	Afghanistan is to Kabul as Iran is to	tehran	Tehran	0.14	1	1	{'Tehran': 0.14, ':': 0.06, '': 0.05, '?': 0.05, 'what': 0.05}	0	0.135742	0	1	key	key|target	0.92	TRUE	TRUE	TRUE	target	{'tehran': 0.92}
Factual Knowledge	capital_world	Kyrgyzstan is to Bishkek as Portugal is to	lisbon	Lisbon	0.13	1	1	{'Lisbon': 0.13, ':': 0.05, '__': 0.06}	0	0.126953	0	1	key	key|target	0.92	TRUE	TRUE	TRUE	target	{'lisbon': 0.92}
Factual Knowledge	capital_world	Nairobi is to Kenya as Podgorica is to	montenegro	Mont	0.67	0.5	0.5	{'Mont': 0.67, 'what': 0.05, 'which': 0.03, '______': 0.01, '__': 0.01}	0	0.671875	0	1	key	key|target	0.92	TRUE	TRUE	TRUE	target	{'montenegro': 0.92}
Factual Knowledge	capital_world	Thimphu is to Bhutan as Asmara is to	eritrea	what	0.52	0	0.5	{'what': 0.52, 'which': 0.12, 'E': 0.08, '__': 0.05, '?': 0.04}	30	0.00137329	0.522064	0.999701	key	key|target	0.92	TRUE	TRUE	TRUE	target	{'eritrea': 0.92}
Factual Knowledge	capital_world	Tallinn is to Estonia as Asmara is to	eritrea	E	0.5	0.5	0.5	{'E': 0.5, 'what': 0.11, '__': 0.07, '______': 0.04, 'which': 0.03}	37	0.00141144	0.494682	0.999631	key	key|target	0.92	TRUE	TRUE	TRUE	target	{'eritrea': 0.92}
Factual Knowledge	capital_world	Antananarivo is to Madagascar as Bishkek is to	kyrgyzstan	Ky	0.41	0.5	0.5	{'Ky': 0.41, 'what': 0.08, '__': 0.05, 'which': 0.04, '?': 0.04}	0	0.40625	0	1	key	key|target	0.92	TRUE	TRUE	TRUE	target	{'kyrgyzstan': 0.92}
Factual Knowledge	capital_world	Ukraine is to Kiev as Belarus is to	minsk	M	0.41	0.5	0.5	{'M': 0.41, ':': 0.06, '______': 0.05, '__': 0.04, '____': 0.04}	144	0.000231743	0.411878	0.998565	key	key|target	0.92	TRUE	TRUE	TRUE	target	{'minsk': 0.92}
Factual Knowledge	capital_world	Uzbekistan is to Tashkent as Albania is to	tirana	Tir	0.38	0.5	0.5	{'Tir': 0.38, '?': 0.04, '?"': 0.03, 'what': 0.03, ':': 0.03}	0	0.382812	0	1	key	key|target	0.92	TRUE	TRUE	TRUE	target	{'tirana': 0.92}
Factual Knowledge	country_capital	Ukraine is to Kiev as Georgia is to	tbilisi	T	0.33	0.5	0.5	{'T': 0.33, '__': 0.12, '______': 0.05, '____': 0.04, ':': 0.04}	45	0.0022583	0.331726	0.999552	key	key|target	0.92	TRUE	TRUE	TRUE	target	{'tbilisi': 0.92}
Factual Knowledge	capital_world	Venezuela is to Caracas as Vietnam is to	hanoi	H	0.31	0.5	0.5	{'H': 0.31, '______': 0.06, 'Ho': 0.05, '__': 0.05, ':': 0.05}	24	0.00524902	0.309204	0.999761	key	key|target	0.92	TRUE	TRUE	TRUE	target	{'hanoi': 0.92}
Factual Knowledge	capital_world	Lithuania is to Vilnius as Namibia is to	windhoek	Wind	0.28	0.5	0.5	{'Wind': 0.28, '__': 0.16, '______': 0.1, '____': 0.05, '_____': 0.04}	0	0.283203	0	1	key	key|target	0.92	TRUE	TRUE	TRUE	target	{'windhoek': 0.92}
Factual Knowledge	capital_world	Bangkok is to Thailand as Banjul is to	gambia	G	0.22	0.5	0.5	{'G': 0.22, 'The': 0.11, 'the': 0.07, 'what': 0.07, '__': 0.05}	88	0.000614166	0.221066	0.999123	key	key|target	0.92	TRUE	TRUE	TRUE	target	{'gambia': 0.92}
Factual Knowledge	capital_world	Madagascar is to Antananarivo as Vietnam is to	hanoi	H	0.19	0.5	0.5	{'H': 0.19, '______': 0.11, '__': 0.1, 'Ho': 0.07, 'Sa': 0.03}	27	0.00494385	0.187439	0.999731	key	key|target	0.92	TRUE	TRUE	TRUE	target	{'hanoi': 0.92}
Factual Knowledge	capital_world	Kenya is to Nairobi as Montenegro is to	podgorica	Pod	0.18	0.5	0.5	{'Pod': 0.18, '?': 0.03, '__': 0.05, 'what': 0.03}	0	0.176758	0	1	key	key|target	0.92	TRUE	TRUE	TRUE	target	{'podgorica': 0.92}
Factual Knowledge	capital_world	Fiji is to Suva as Jordan is to	amman	__	0.18	0	0.5	{'__': 0.18, 'Am': 0.12, '______': 0.09, '___': 0.05, ':': 0.05}	1	0.124023	0.0566406	0.99999	key	key|target	0.92	TRUE	TRUE	TRUE	target	{'amman': 0.92}
Factual Knowledge	capital_world	Bhutan is to Thimphu as Jordan is to	amman	Am	0.16	0.5	0.5	{'Am': 0.16, '__': 0.07, '______': 0.06, '___': 0.05, '?': 0.05}	0	0.157227	0	1	key	key|target	0.92	TRUE	TRUE	TRUE	target	{'amman': 0.92}
Factual Knowledge	capital_world	Madagascar is to Antananarivo as Tuvalu is to	funafuti	__	0.14	0	0.5	{'__': 0.14, '______': 0.07, '____': 0.06, 'Fun': 0.04, ':': 0.03}	3	0.0366211	0.0991211	0.99997	key	key|target	0.92	TRUE	TRUE	TRUE	target	{'funafuti': 0.92}
Factual Knowledge	capital_world	Fiji is to Suva as Eritrea is to	asmara	__	0.1	0	0.5	{'__': 0.1, 'As': 0.07, '?"': 0.07, '?': 0.07, '______': 0.04}	1	0.074707	0.0302734	0.99999	key	key|target	0.92	TRUE	TRUE	TRUE	target	{'asmara': 0.92}
Factual Knowledge	capital_world	Mali is to Bamako as Belize is to	belmopan	:	0.25	0	0	{':': 0.05, '?': 0.1, '______': 0.04}	6	0.0283203	0.223633	0.99994	key	key|target	0.92	TRUE	TRUE	TRUE	target	{'belmopan': 0.92}
Factual Knowledge	capital_world	Pakistan is to Islamabad as Egypt is to	cairo	:	0.2	0	0	{':': 0.06, '?': 0.04}	5	0.034668	0.164551	0.99995	key	key|target	0.92	TRUE	TRUE	TRUE	target	{'cairo': 0.92}
Factual Knowledge	capital_world	Baku is to Azerbaijan as Cairo is to	egypt	Egypt	0.95	1	1	{'Egypt': 0.95, 'Eq': 0.0, '______': 0.0, '__': 0.0, 'what': 0.0}	0	0.949219	0	1	key	key|target	0.91	TRUE	TRUE	TRUE	target	{'egypt': 0.91}
Factual Knowledge	country_capital	Kiev is to Ukraine as Lima is to	peru	Peru	0.88	1	1	{'Peru': 0.88, '______': 0.02, '__': 0.02, 'what': 0.01, 'Per': 0.01}	0	0.878906	0	1	key	key|target	0.91	TRUE	TRUE	TRUE	target	{'peru': 0.91}
Factual Knowledge	capital_world	Kiev is to Ukraine as Lima is to	peru	Peru	0.88	1	1	{'Peru': 0.88, '______': 0.02, '__': 0.02, 'what': 0.01, 'Per': 0.01}	0	0.878906	0	1	key	key|target	0.91	TRUE	TRUE	TRUE	target	{'peru': 0.91}
Factual Knowledge	capital_world	Windhoek is to Namibia as Budapest is to	hungary	Hungary	0.88	1	1	{'Hungary': 0.88, '______': 0.01, 'what': 0.01, 'the': 0.01, '__': 0.01}	0	0.875	0	1	key	key|target	0.91	TRUE	TRUE	TRUE	target	{'hungary': 0.91}
Factual Knowledge	country_capital	Islamabad is to Pakistan as Oslo is to	norway	Norway	0.87	1	1	{'Norway': 0.87, '______': 0.01, 'which': 0.01, '__': 0.01, 'what': 0.01}	0	0.867188	0	1	key	key|target	0.91	TRUE	TRUE	TRUE	target	{'norway': 0.91}
Factual Knowledge	capital_world	Islamabad is to Pakistan as Oslo is to	norway	Norway	0.87	1	1	{'Norway': 0.87, '______': 0.01, 'which': 0.01, '__': 0.01, 'what': 0.01}	0	0.867188	0	1	key	key|target	0.91	TRUE	TRUE	TRUE	target	{'norway': 0.91}
Factual Knowledge	capital_world	Tashkent is to Uzbekistan as Bangkok is to	thailand	Thailand	0.86	1	1	{'Thailand': 0.86, 'what': 0.02, '______': 0.01, '__': 0.01, 'which': 0.01}	0	0.855469	0	1	key	key|target	0.91	TRUE	TRUE	TRUE	target	{'thailand': 0.91}
Factual Knowledge	country_capital	Kiev is to Ukraine as Lisbon is to	portugal	Portugal	0.84	1	1	{'Portugal': 0.84, '______': 0.02, '__': 0.02, 'what': 0.02, '_____': 0.01}	0	0.839844	0	1	key	key|target	0.91	TRUE	TRUE	TRUE	target	{'portugal': 0.91}
Factual Knowledge	capital_world	Kiev is to Ukraine as Lisbon is to	portugal	Portugal	0.84	1	1	{'Portugal': 0.84, '______': 0.02, '__': 0.02, 'what': 0.02, '_____': 0.01}	0	0.839844	0	1	key	key|target	0.91	TRUE	TRUE	TRUE	target	{'portugal': 0.91}
Factual Knowledge	capital_world	Antananarivo is to Madagascar as Athens is to	greece	Greece	0.84	1	1	{'Greece': 0.84, '__': 0.02, '______': 0.01, 'Cre': 0.01, 'the': 0.01}	0	0.835938	0	1	key	key|target	0.91	TRUE	TRUE	TRUE	target	{'greece': 0.91}
Factual Knowledge	country_capital	Helsinki is to Finland as Kabul is to	afghanistan	Afghanistan	0.81	1	1	{'Afghanistan': 0.81, 'A': 0.02, 'what': 0.02, '______': 0.01, '__': 0.01}	0	0.808594	0	1	key	key|target	0.91	TRUE	TRUE	TRUE	target	{'afghanistan': 0.91}
Factual Knowledge	capital_world	Helsinki is to Finland as Kabul is to	afghanistan	Afghanistan	0.81	1	1	{'Afghanistan': 0.81, 'A': 0.02, 'what': 0.02, '______': 0.01, '__': 0.01}	0	0.808594	0	1	key	key|target	0.91	TRUE	TRUE	TRUE	target	{'afghanistan': 0.91}
Factual Knowledge	capital_world	Caracas is to Venezuela as Madrid is to	spain	Spain	0.8	1	1	{'Spain': 0.8, '______': 0.04, '__': 0.02, '_____': 0.02, 'what': 0.01}	0	0.800781	0	1	key	key|target	0.91	TRUE	TRUE	TRUE	target	{'spain': 0.91}
Factual Knowledge	capital_world	Baku is to Azerbaijan as Kampala is to	uganda	Uganda	0.79	1	1	{'Uganda': 0.79, '______': 0.03, '__': 0.03, '_____': 0.01, 'what': 0.01}	0	0.785156	0	1	key	key|target	0.91	TRUE	TRUE	TRUE	target	{'uganda': 0.91}
Factual Knowledge	capital_world	Ottawa is to Canada as Havana is to	cuba	Cuba	0.79	1	1	{'Cuba': 0.79, '______': 0.03, 'what': 0.02, 'the': 0.02, '__': 0.01}	0	0.792969	0	1	key	key|target	0.91	TRUE	TRUE	TRUE	target	{'cuba': 0.91}
Factual Knowledge	capital_world	Yerevan is to Armenia as Bratislava is to	slovakia	Slovakia	0.78	1	1	{'Slovakia': 0.78, 'what': 0.03, 'which': 0.02, 'the': 0.02, '______': 0.02}	0	0.78125	0	1	key	key|target	0.91	TRUE	TRUE	TRUE	target	{'slovakia': 0.91}
Factual Knowledge	capital_world	Stockholm is to Sweden as Cairo is to	egypt	Egypt	0.76	1	1	{'Egypt': 0.76, '______': 0.02, '__': 0.02, 'what': 0.01, '?': 0.01}	0	0.761719	0	1	key	key|target	0.91	TRUE	TRUE	TRUE	target	{'egypt': 0.91}
Factual Knowledge	capital_world	Lisbon is to Portugal as Nassau is to	bahamas	the	0.75	0	1	{'the': 0.75, 'The': 0.16, 'Bahamas': 0.01, 'Bermuda': 0.01, '______': 0.0}	2	0.00964355	0.744263	0.99998	key	key|target	0.91	TRUE	TRUE	TRUE	target	{'bahamas': 0.91}
Factual Knowledge	capital_world	Tbilisi is to Georgia as Amman is to	jordan	Jordan	0.74	1	1	{'Jordan': 0.74, 'what': 0.05, '__': 0.04, '______': 0.03, '___': 0.02}	0	0.742188	0	1	key	key|target	0.91	TRUE	TRUE	TRUE	target	{'jordan': 0.91}
Factual Knowledge	country_capital	Canberra is to Australia as Lima is to	peru	Peru	0.68	1	1	{'Peru': 0.68, '______': 0.05, '__': 0.04, 'what': 0.02, '___': 0.02}	0	0.683594	0	1	key	key|target	0.91	TRUE	TRUE	TRUE	target	{'peru': 0.91}
Factual Knowledge	capital_world	Canberra is to Australia as Lima is to	peru	Peru	0.68	1	1	{'Peru': 0.68, '______': 0.05, '__': 0.04, 'what': 0.02, '___': 0.02}	0	0.683594	0	1	key	key|target	0.91	TRUE	TRUE	TRUE	target	{'peru': 0.91}
Factual Knowledge	capital_world	Antananarivo is to Madagascar as Hanoi is to	vietnam	Vietnam	0.66	1	1	{'Vietnam': 0.66, 'Viet': 0.06, '______': 0.04, '__': 0.03, 'what': 0.02}	0	0.65625	0	1	key	key|target	0.91	TRUE	TRUE	TRUE	target	{'vietnam': 0.91}
Factual Knowledge	capital_world	Yerevan is to Armenia as Amman is to	jordan	Jordan	0.66	1	1	{'Jordan': 0.66, '__': 0.08, 'what': 0.04, '______': 0.04, '___': 0.03}	0	0.664062	0	1	key	key|target	0.91	TRUE	TRUE	TRUE	target	{'jordan': 0.91}
Factual Knowledge	name_occupation	hume is to philosopher as pacino is to	actor	actor	0.65	1	1	{'actor': 0.65, 'movie': 0.02, 'the': 0.02, '__': 0.01, 'gang': 0.01}	0	0.648438	0	1	key	key|target	0.91	TRUE	TRUE	TRUE	target	{'actor': 0.91}
Factual Knowledge	capital_world	Harare is to Zimbabwe as Manila is to	philippines	the	0.65	0	1	{'the': 0.65, '______': 0.05, '__': 0.05, 'Philippines': 0.02, ':': 0.02}	3	0.0211182	0.627319	0.99997	key	key|target	0.91	TRUE	TRUE	TRUE	target	{'philippines': 0.91}
Factual Knowledge	country_capital	Kabul is to Afghanistan as Vienna is to	austria	Austria	0.64	1	1	{'Austria': 0.64, '______': 0.04, 'what': 0.03, '__': 0.03, 'A': 0.02}	0	0.644531	0	1	key	key|target	0.91	TRUE	TRUE	TRUE	target	{'austria': 0.91}
Factual Knowledge	country_capital	Kabul is to Afghanistan as London is to	england	England	0.62	1	1	{'England': 0.62, 'the': 0.09, 'Great': 0.05, 'Britain': 0.03, '______': 0.03}	0	0.617188	0	1	key	key|target	0.91	TRUE	TRUE	TRUE	target	{'england': 0.91}
Factual Knowledge	capital_world	Kabul is to Afghanistan as London is to	england	England	0.62	1	1	{'England': 0.62, 'the': 0.09, 'Great': 0.05, 'Britain': 0.03, '______': 0.03}	0	0.617188	0	1	key	key|target	0.91	TRUE	TRUE	TRUE	target	{'england': 0.91}
Factual Knowledge	capital_world	Paris is to France as Athens is to	greece	Greece	0.62	1	1	{'Greece': 0.62, 'what': 0.05, '______': 0.03, '__': 0.03, 'which': 0.03}	0	0.621094	0	1	key	key|target	0.91	TRUE	TRUE	TRUE	target	{'greece': 0.91}
Factual Knowledge	capital_world	Algiers is to Algeria as Belmopan is to	belize	Belize	0.61	1	1	{'Belize': 0.61, 'what': 0.12, 'which': 0.05, '?': 0.03, '______': 0.02}	0	0.609375	0	1	key	key|target	0.91	TRUE	TRUE	TRUE	target	{'belize': 0.91}
Factual Knowledge	capital_world	Dublin is to Ireland as Nassau is to	bahamas	the	0.6	0	1	{'the': 0.6, 'The': 0.18, 'Bahamas': 0.02, 'what': 0.01, '___': 0.01}	2	0.0218506	0.579712	0.99998	key	key|target	0.91	TRUE	TRUE	TRUE	target	{'bahamas': 0.91}
Factual Knowledge	capital_world	Dakar is to Senegal as Manila is to	philippines	the	0.6	0	1	{'the': 0.6, '______': 0.09, '__': 0.04, ':': 0.03, 'Philippines': 0.02}	4	0.0230713	0.574585	0.99996	key	key|target	0.91	TRUE	TRUE	TRUE	target	{'philippines': 0.91}
Factual Knowledge	capital_world	Jakarta is to Indonesia as Monrovia is to	liberia	Liberia	0.6	1	1	{'Liberia': 0.6, '__': 0.07, 'what': 0.04, '______': 0.04, '____': 0.03}	0	0.601562	0	1	key	key|target	0.91	TRUE	TRUE	TRUE	target	{'liberia': 0.91}
Factual Knowledge	capital_world	Montevideo is to Uruguay as Nassau is to	bahamas	the	0.59	0	1	{'the': 0.59, 'The': 0.16, 'Bahamas': 0.03, '__': 0.03, '___': 0.02}	2	0.026123	0.567627	0.99998	key	key|target	0.91	TRUE	TRUE	TRUE	target	{'bahamas': 0.91}
Factual Knowledge	capital_world	Tirana is to Albania as Bratislava is to	slovakia	Slovakia	0.59	1	1	{'Slovakia': 0.59, 'what': 0.1, 'which': 0.05, '______': 0.02, '__': 0.02}	0	0.589844	0	1	key	key|target	0.91	TRUE	TRUE	TRUE	target	{'slovakia': 0.91}
Factual Knowledge	capital_world	Havana is to Cuba as Nicosia is to	cyprus	Cyprus	0.57	1	1	{'Cyprus': 0.57, 'what': 0.07, 'which': 0.05, '__': 0.05, '______': 0.04}	0	0.574219	0	1	key	key|target	0.91	TRUE	TRUE	TRUE	target	{'cyprus': 0.91}
Factual Knowledge	capital_world	Bishkek is to Kyrgyzstan as Budapest is to	hungary	Hungary	0.57	1	1	{'Hungary': 0.57, '______': 0.07, '__': 0.05, 'what': 0.03, 'which': 0.03}	0	0.570312	0	1	key	key|target	0.91	TRUE	TRUE	TRUE	target	{'hungary': 0.91}
Factual Knowledge	capital_world	Maputo is to Mozambique as Muscat is to	oman	Oman	0.51	1	1	{'Oman': 0.51, '?': 0.05, '__': 0.04, '_____': 0.03, 'which': 0.03}	0	0.507812	0	1	key	key|target	0.91	TRUE	TRUE	TRUE	target	{'oman': 0.91}
Factual Knowledge	name_occupation	dante is to poet as moses is to	prophet	prophet	0.5	1	1	{'prophet': 0.5, 'law': 0.06, 'leader': 0.03, '______': 0.02, 'what': 0.01}	0	0.503906	0	1	key	key|target	0.91	TRUE	TRUE	TRUE	target	{'prophet': 0.91}
Factual Knowledge	capital_world	Cairo is to Egypt as Kigali is to	rwanda	Rwanda	0.5	1	1	{'Rwanda': 0.5, '______': 0.05, '__': 0.04, 'what': 0.03, 'Bur': 0.03}	0	0.5	0	1	key	key|target	0.91	TRUE	TRUE	TRUE	target	{'rwanda': 0.91}
Factual Knowledge	capital_world	Nepal is to Kathmandu as Norway is to	oslo	Oslo	0.5	1	1	{'Oslo': 0.5, '______': 0.07, '__': 0.04, '____': 0.02, '?': 0.02}	0	0.496094	0	1	key	key|target	0.91	TRUE	TRUE	TRUE	target	{'oslo': 0.91}
Factual Knowledge	capital_world	Managua is to Nicaragua as Monrovia is to	liberia	Liberia	0.41	1	1	{'Liberia': 0.41, '__': 0.11, 'what': 0.08, '____': 0.06, '______': 0.06}	0	0.40625	0	1	key	key|target	0.91	TRUE	TRUE	TRUE	target	{'liberia': 0.91}
Factual Knowledge	capital_world	Managua is to Nicaragua as Skopje is to	macedonia	what	0.39	0	1	{'what': 0.39, 'Macedonia': 0.15, 'which': 0.07, '__': 0.05, '______': 0.04}	1	0.15332	0.237305	0.99999	key	key|target	0.91	TRUE	TRUE	TRUE	target	{'macedonia': 0.91}
Factual Knowledge	capital_world	Doha is to Qatar as Lima is to	peru	Peru	0.32	1	1	{'Peru': 0.32, ':': 0.06, '______': 0.05, 'what': 0.05}	0	0.316406	0	1	key	key|target	0.91	TRUE	TRUE	TRUE	target	{'peru': 0.91}
Factual Knowledge	country_capital	Australia is to Canberra as Cuba is to	havana	Havana	0.3	1	1	{'Havana': 0.3, '______': 0.06, '__': 0.05, ':': 0.03}	0	0.296875	0	1	key	key|target	0.91	TRUE	TRUE	TRUE	target	{'havana': 0.91}
Factual Knowledge	capital_world	Australia is to Canberra as Cuba is to	havana	Havana	0.3	1	1	{'Havana': 0.3, '______': 0.06, '__': 0.05, ':': 0.03}	0	0.296875	0	1	key	key|target	0.91	TRUE	TRUE	TRUE	target	{'havana': 0.91}
Factual Knowledge	capital_world	Nicosia is to Cyprus as Skopje is to	macedonia	what	0.24	0	1	{'what': 0.24, 'Macedonia': 0.14, 'which': 0.13, '__': 0.05, 'the': 0.04}	1	0.139648	0.0976562	0.99999	key	key|target	0.91	TRUE	TRUE	TRUE	target	{'macedonia': 0.91}
Factual Knowledge	capital_world	Tbilisi is to Georgia as Ankara is to	turkey	Turkey	0.22	1	1	{'Turkey': 0.22, '______': 0.1, 'what': 0.09, '__': 0.08, '___': 0.06}	0	0.21582	0	1	key	key|target	0.91	TRUE	TRUE	TRUE	target	{'turkey': 0.91}
Factual Knowledge	capital_world	Vienna is to Austria as Abuja is to	nigeria	Nigeria	0.21	1	1	{'Nigeria': 0.21, '______': 0.11, '__': 0.07, '____': 0.06, 'what': 0.05}	0	0.208984	0	1	key	key|target	0.91	TRUE	TRUE	TRUE	target	{'nigeria': 0.91}
Factual Knowledge	capital_world	London is to England as Skopje is to	macedonia	Macedonia	0.19	1	1	{'Macedonia': 0.19, 'what': 0.16, '______': 0.05, '__': 0.05, 'which': 0.04}	0	0.193359	0	1	key	key|target	0.91	TRUE	TRUE	TRUE	target	{'macedonia': 0.91}
Factual Knowledge	capital_world	Kyrgyzstan is to Bishkek as Peru is to	lima	Lima	0.19	1	1	{'Lima': 0.19, ':': 0.06, '': 0.05, '__': 0.05}	0	0.19043	0	1	key	key|target	0.91	TRUE	TRUE	TRUE	target	{'lima': 0.91}
Factual Knowledge	name_occupation	lincoln is to president as raphael is to	painter	artist	0.15	0	1	{'artist': 0.15, 'painter': 0.11, '__': 0.05, '____': 0.05, '___': 0.04}	1	0.106445	0.0390625	0.99999	key	key|target	0.91	TRUE	TRUE	TRUE	target	{'painter': 0.91}
Factual Knowledge	capital_world	Manila is to Philippines as Muscat is to	oman	?	0.14	0	1	{'?': 0.04, 'Oman': 0.09, 'which': 0.06, '______': 0.05}	1	0.0859375	0.0507812	0.99999	key	key|target	0.91	TRUE	TRUE	TRUE	target	{'oman': 0.91}
Factual Knowledge	capital_world	Nepal is to Kathmandu as Philippines is to	manila	Manila	0.14	1	1	{'Manila': 0.14, '______': 0.11, '__': 0.09, '____': 0.06, ':': 0.05}	0	0.143555	0	1	key	key|target	0.91	TRUE	TRUE	TRUE	target	{'manila': 0.91}
Factual Knowledge	capital_world	Sweden is to Stockholm as Egypt is to	cairo	:	0.14	0	1	{':': 0.08, '?': 0.1, 'Cairo': 0.07, 'what': 0.05}	3	0.074707	0.0649414	0.99997	key	key|target	0.91	TRUE	TRUE	TRUE	target	{'cairo': 0.91}
Factual Knowledge	capital_world	Canberra is to Australia as Kigali is to	rwanda	Rwanda	0.13	1	1	{'Rwanda': 0.13, 'what': 0.11, '__': 0.07, '?': 0.06, 'which': 0.06}	0	0.132812	0	1	key	key|target	0.91	TRUE	TRUE	TRUE	target	{'rwanda': 0.91}
Factual Knowledge	capital_world	Apia is to Samoa as Bishkek is to	kyrgyzstan	Ky	0.67	0.5	0.5	{'Ky': 0.67, 'the': 0.04, 'what': 0.04, '__': 0.03, 'Kir': 0.01}	0	0.671875	0	1	key	key|target	0.91	TRUE	TRUE	TRUE	target	{'kyrgyzstan': 0.91}
Factual Knowledge	capital_world	Beirut is to Lebanon as Bishkek is to	kyrgyzstan	Ky	0.54	0.5	0.5	{'Ky': 0.54, 'what': 0.07, 'which': 0.04, '__': 0.03, 'the': 0.03}	0	0.539062	0	1	key	key|target	0.91	TRUE	TRUE	TRUE	target	{'kyrgyzstan': 0.91}
Factual Knowledge	capital_world	Ukraine is to Kiev as Latvia is to	riga	R	0.32	0.5	0.5	{'R': 0.32, ':': 0.06, '______': 0.03, '__': 0.03, '': 0.03}	163	0.000274658	0.321991	0.998376	key	key|target	0.91	TRUE	TRUE	TRUE	target	{'riga': 0.91}
Factual Knowledge	capital_world	Uzbekistan is to Tashkent as Libya is to	tripoli	Trip	0.24	0.5	0.5	{'Trip': 0.24, ':': 0.05, '"': 0.04, '': 0.04}	0	0.237305	0	1	key	key|target	0.91	TRUE	TRUE	TRUE	target	{'tripoli': 0.91}
Factual Knowledge	capital_world	Uzbekistan is to Tashkent as Honduras is to	tegucigalpa	T	0.2	0.5	0.5	{'T': 0.2, '______': 0.07, 'what': 0.06, ':': 0.06, '__': 0.05}	67	0.000946045	0.197296	0.999332	key	key|target	0.91	TRUE	TRUE	TRUE	target	{'tegucigalpa': 0.91}
Factual Knowledge	capital_world	Taiwan is to Taipei as Eritrea is to	asmara	As	0.2	0.5	0.5	{'As': 0.2, '__': 0.1, '______': 0.06, '?': 0.04}	0	0.195312	0	1	key	key|target	0.91	TRUE	TRUE	TRUE	target	{'asmara': 0.91}
Factual Knowledge	capital_world	Niger is to Niamey as Macedonia is to	skopje	Sk	0.19	0.5	0.5	{'Sk': 0.19, 'what': 0.06, '__': 0.04, ':': 0.04, '': 0.04}	0	0.192383	0	1	key	key|target	0.91	TRUE	TRUE	TRUE	target	{'skopje': 0.91}
Factual Knowledge	capital_world	Austria is to Vienna as Eritrea is to	asmara	As	0.12	0.5	0.5	{'As': 0.12, '__': 0.1, '______': 0.06, '____': 0.05, '?': 0.04}	0	0.115234	0	1	key	key|target	0.91	TRUE	TRUE	TRUE	target	{'asmara': 0.91}
Factual Knowledge	capital_world	Sweden is to Stockholm as Eritrea is to	asmara	As	0.1	0.5	0.5	{'As': 0.1, '__': 0.1, '______': 0.06, '?': 0.05, 'what': 0.04}	0	0.101562	0	1	key	key|target	0.91	TRUE	TRUE	TRUE	target	{'asmara': 0.91}
Factual Knowledge	capital_world	Chile is to Santiago as Liechtenstein is to	vaduz	__	0.09	0	0.5	{'__': 0.09, '______': 0.08, 'Vad': 0.06, 'what': 0.04, '____': 0.04}	2	0.0629883	0.0229492	0.99998	key	key|target	0.91	TRUE	TRUE	TRUE	target	{'vaduz': 0.91}
Factual Knowledge	capital_world	Lusaka is to Zambia as Nassau is to	bahamas	the	0.37	0	0	{'the': 0.37, 'The': 0.13, '__': 0.08, '___': 0.07, '______': 0.05}	6	0.0218506	0.343384	0.99994	key	key|target	0.91	TRUE	TRUE	TRUE	target	{'bahamas': 0.91}
Factual Knowledge	capital_world	Guyana is to Georgetown as Philippines is to	manila		0.17	0	0	{'': 0.05, '______': 0.13, '"': 0.07, '?': 0.05}	6	0.0412598	0.132568	0.99994	key	key|target	0.91	TRUE	TRUE	TRUE	target	{'manila': 0.91}
Factual Knowledge	capital_world	Yerevan is to Armenia as Cairo is to	egypt	Egypt	0.97	1	1	{'Egypt': 0.97, '': 0.0, '__': 0.0, 'Eq': 0.0, 'the': 0.0}	0	0.96875	0	1	key	key|target	0.9	TRUE	TRUE	TRUE	target	{'egypt': 0.9}
Factual Knowledge	country_capital	Jakarta is to Indonesia as Tehran is to	iran	Iran	0.95	1	1	{'Iran': 0.95, 'Pers': 0.01, 'the': 0.01, 'what': 0.0, '': 0.0}	0	0.953125	0	1	key	key|target	0.9	TRUE	TRUE	TRUE	target	{'iran': 0.9}
Factual Knowledge	capital_world	Baku is to Azerbaijan as Havana is to	cuba	Cuba	0.95	1	1	{'Cuba': 0.95, 'the': 0.01, '': 0.0, 'Cub': 0.0}	0	0.953125	0	1	key	key|target	0.9	TRUE	TRUE	TRUE	target	{'cuba': 0.9}
Factual Knowledge	country_capital	Beirut is to Lebanon as Madrid is to	spain	Spain	0.89	1	1	{'Spain': 0.89, '______': 0.01, 'what': 0.01, '__': 0.01, '_____': 0.01}	0	0.890625	0	1	key	key|target	0.9	TRUE	TRUE	TRUE	target	{'spain': 0.9}
Factual Knowledge	capital_world	Algiers is to Algeria as Dublin is to	ireland	Ireland	0.89	1	1	{'Ireland': 0.89, 'the': 0.03, 'E': 0.01, '______': 0.01, '__': 0.01}	0	0.894531	0	1	key	key|target	0.9	TRUE	TRUE	TRUE	target	{'ireland': 0.9}
Factual Knowledge	capital_world	Tbilisi is to Georgia as Tripoli is to	libya	Libya	0.81	1	1	{'Libya': 0.81, 'Lebanon': 0.02, 'what': 0.02, '___': 0.01, '__': 0.01}	0	0.808594	0	1	key	key|target	0.9	TRUE	TRUE	TRUE	target	{'libya': 0.9}
Factual Knowledge	capital_world	Kathmandu is to Nepal as Ljubljana is to	slovenia	Slovenia	0.8	1	1	{'Slovenia': 0.8, 'what': 0.02, '__': 0.02, 'which': 0.01, '______': 0.01}	0	0.800781	0	1	key	key|target	0.9	TRUE	TRUE	TRUE	target	{'slovenia': 0.9}
Factual Knowledge	capital_world	Kingston is to Jamaica as Mogadishu is to	somalia	Somalia	0.77	1	1	{'Somalia': 0.77, '______': 0.03, 'what': 0.02, '__': 0.02, 'Som': 0.02}	0	0.773438	0	1	key	key|target	0.9	TRUE	TRUE	TRUE	target	{'somalia': 0.9}
Factual Knowledge	capital_world	Harare is to Zimbabwe as Madrid is to	spain	Spain	0.75	1	1	{'Spain': 0.75, '______': 0.04, '__': 0.02, 'what': 0.02, '_____': 0.01}	0	0.746094	0	1	key	key|target	0.9	TRUE	TRUE	TRUE	target	{'spain': 0.9}
Factual Knowledge	name_occupation	mencius is to philosopher as pacino is to	actor	actor	0.62	1	1	{'actor': 0.62, 'the': 0.02, '__': 0.01, '...': 0.01, 'what': 0.01}	0	0.621094	0	1	key	key|target	0.9	TRUE	TRUE	TRUE	target	{'actor': 0.9}
Factual Knowledge	name_occupation	kant is to philosopher as wagner is to	composer	composer	0.6	1	1	{'composer': 0.6, 'musician': 0.15, 'opera': 0.05, 'music': 0.03, 'what': 0.01}	0	0.597656	0	1	key	key|target	0.9	TRUE	TRUE	TRUE	target	{'composer': 0.9}
Factual Knowledge	capital_world	Yerevan is to Armenia as Belmopan is to	belize	Belize	0.59	1	1	{'Belize': 0.59, 'what': 0.12, 'which': 0.05, '______': 0.03, '__': 0.03}	0	0.59375	0	1	key	key|target	0.9	TRUE	TRUE	TRUE	target	{'belize': 0.9}
Factual Knowledge	capital_world	Kabul is to Afghanistan as Monrovia is to	liberia	Liberia	0.55	1	1	{'Liberia': 0.55, '__': 0.06, 'what': 0.04, '______': 0.03, '____': 0.03}	0	0.550781	0	1	key	key|target	0.9	TRUE	TRUE	TRUE	target	{'liberia': 0.9}
Factual Knowledge	capital_world	Uzbekistan is to Tashkent as Poland is to	warsaw	Warsaw	0.48	1	1	{'Warsaw': 0.48, '______': 0.04, ':': 0.02, '__': 0.02, '': 0.02}	0	0.476562	0	1	key	key|target	0.9	TRUE	TRUE	TRUE	target	{'warsaw': 0.9}
Factual Knowledge	country_language	Mozambique is to Portuguese as Netherlands is to	dutch	Dutch	0.47	1	1	{'Dutch': 0.47, 'English': 0.05, '': 0.05, '?': 0.04, ':': 0.03}	0	0.46875	0	1	key	key|target	0.9	TRUE	TRUE	TRUE	target	{'dutch': 0.9}
Factual Knowledge	name_occupation	andersen is to writer as newton is to	scientist	scientist	0.45	1	1	{'scientist': 0.45, 'physicist': 0.14, 'physics': 0.06, 'inventor': 0.02, 'science': 0.02}	0	0.451172	0	1	key	key|target	0.9	TRUE	TRUE	TRUE	target	{'scientist': 0.9}
Factual Knowledge	name_occupation	mencius is to philosopher as newton is to	scientist	scientist	0.45	1	1	{'scientist': 0.45, 'physicist': 0.17, 'mathematic': 0.03, 'physics': 0.02, '?': 0.02}	0	0.449219	0	1	key	key|target	0.9	TRUE	TRUE	TRUE	target	{'scientist': 0.9}
Factual Knowledge	capital_world	Caracas is to Venezuela as Kampala is to	uganda	Uganda	0.45	1	1	{'Uganda': 0.45, 'what': 0.08, '______': 0.08, '__': 0.06, '_____': 0.03}	0	0.445312	0	1	key	key|target	0.9	TRUE	TRUE	TRUE	target	{'uganda': 0.9}
Factual Knowledge	capital_world	Uzbekistan is to Tashkent as Japan is to	tokyo	Tokyo	0.44	1	1	{'Tokyo': 0.44, '': 0.03, '______': 0.03, 'what': 0.03}	0	0.441406	0	1	key	key|target	0.9	TRUE	TRUE	TRUE	target	{'tokyo': 0.9}
Factual Knowledge	capital_world	Montevideo is to Uruguay as Tallinn is to	estonia	Estonia	0.43	1	1	{'Estonia': 0.43, 'what': 0.09, 'which': 0.09, ':': 0.04, '______': 0.04}	0	0.429688	0	1	key	key|target	0.9	TRUE	TRUE	TRUE	target	{'estonia': 0.9}
Factual Knowledge	capital_world	Bamako is to Mali as Damascus is to	syria	Syria	0.42	1	1	{'Syria': 0.42, '______': 0.1, '__': 0.08, ':': 0.07, 'what': 0.04}	0	0.417969	0	1	key	key|target	0.9	TRUE	TRUE	TRUE	target	{'syria': 0.9}
Factual Knowledge	capital_world	Montenegro is to Podgorica as Iran is to	tehran	Tehran	0.42	1	1	{'Tehran': 0.42, '__': 0.07, '______': 0.04, ':': 0.03}	0	0.421875	0	1	key	key|target	0.9	TRUE	TRUE	TRUE	target	{'tehran': 0.9}
Factual Knowledge	name_occupation	hume is to philosopher as moses is to	prophet	prophet	0.39	1	1	{'prophet': 0.39, 'religion': 0.05, 'religious': 0.04, 'law': 0.03, 'jew': 0.03}	0	0.392578	0	1	key	key|target	0.9	TRUE	TRUE	TRUE	target	{'prophet': 0.9}
Factual Knowledge	name_occupation	kant is to philosopher as tolstoi is to	novelist	writer	0.39	0	1	{'writer': 0.39, 'novelist': 0.22, 'author': 0.08, 'russian': 0.01, 'artist': 0.01}	1	0.222656	0.167969	0.99999	key	key|target	0.9	TRUE	TRUE	TRUE	target	{'novelist': 0.9}
Factual Knowledge	capital_world	Kiev is to Ukraine as Muscat is to	oman	Oman	0.39	1	1	{'Oman': 0.39, '_____': 0.08, '__': 0.07, '______': 0.05, '____': 0.05}	0	0.392578	0	1	key	key|target	0.9	TRUE	TRUE	TRUE	target	{'oman': 0.9}
Factual Knowledge	capital_world	Manila is to Philippines as Tripoli is to	libya	Libya	0.38	1	1	{'Libya': 0.38, 'what': 0.11, '?': 0.05, ':': 0.03, '___': 0.03}	0	0.384766	0	1	key	key|target	0.9	TRUE	TRUE	TRUE	target	{'libya': 0.9}
Factual Knowledge	name_occupation	kant is to philosopher as moses is to	prophet	prophet	0.36	1	1	{'prophet': 0.36, 'religion': 0.05, 'jew': 0.04, 'religious': 0.04, 'law': 0.04}	0	0.359375	0	1	key	key|target	0.9	TRUE	TRUE	TRUE	target	{'prophet': 0.9}
Factual Knowledge	name_occupation	haydn is to composer as moses is to	prophet	prophet	0.36	1	1	{'prophet': 0.36, 'law': 0.08, 'leader': 0.04, '?': 0.02, 'what': 0.02}	0	0.357422	0	1	key	key|target	0.9	TRUE	TRUE	TRUE	target	{'prophet': 0.9}
Factual Knowledge	capital_world	Lusaka is to Zambia as Tehran is to	iran	Iran	0.33	1	1	{'Iran': 0.33, 'what': 0.1, '___': 0.06, '__': 0.06, '______': 0.05}	0	0.332031	0	1	key	key|target	0.9	TRUE	TRUE	TRUE	target	{'iran': 0.9}
Factual Knowledge	capital_world	Paris is to France as Abuja is to	nigeria	Nigeria	0.32	1	1	{'Nigeria': 0.32, '______': 0.09, '__': 0.05, 'what': 0.04, 'which': 0.03}	0	0.316406	0	1	key	key|target	0.9	TRUE	TRUE	TRUE	target	{'nigeria': 0.9}
Factual Knowledge	capital_world	Algiers is to Algeria as Astana is to	kazakhstan	which	0.31	0	1	{'which': 0.31, 'what': 0.16, 'Kazakhstan': 0.15, '?': 0.06, '____': 0.03}	2	0.154297	0.152344	0.99998	key	key|target	0.9	TRUE	TRUE	TRUE	target	{'kazakhstan': 0.9}
Factual Knowledge	name_occupation	descartes is to mathematician as einstein is to	physicist	physicist	0.3	1	1	{'physicist': 0.3, 'scientist': 0.14, '?': 0.03, '': 0.03}	0	0.296875	0	1	key	key|target	0.9	TRUE	TRUE	TRUE	target	{'physicist': 0.9}
Factual Knowledge	name_occupation	balzac is to novelist as moses is to	prophet	prophet	0.27	1	1	{'prophet': 0.27, '?': 0.04, 'law': 0.04, ':': 0.03}	0	0.269531	0	1	key	key|target	0.9	TRUE	TRUE	TRUE	target	{'prophet': 0.9}
Factual Knowledge	country_capital	Iraq is to Baghdad as Philippines is to	manila	Manila	0.25	1	1	{'Manila': 0.25, '______': 0.14, '_____': 0.06, '__': 0.05, '': 0.04}	0	0.24707	0	1	key	key|target	0.9	TRUE	TRUE	TRUE	target	{'manila': 0.9}
Factual Knowledge	country_capital	Ottawa is to Canada as Taipei is to	taiwan	Taiwan	0.23	1	1	{'Taiwan': 0.23, '______': 0.1, '__': 0.06, '_____': 0.05, '____': 0.05}	0	0.229492	0	1	key	key|target	0.9	TRUE	TRUE	TRUE	target	{'taiwan': 0.9}
Factual Knowledge	capital_world	Ottawa is to Canada as Taipei is to	taiwan	Taiwan	0.23	1	1	{'Taiwan': 0.23, '______': 0.1, '__': 0.06, '_____': 0.05, '____': 0.05}	0	0.229492	0	1	key	key|target	0.9	TRUE	TRUE	TRUE	target	{'taiwan': 0.9}
Factual Knowledge	capital_world	Somalia is to Mogadishu as Norway is to	oslo	Oslo	0.23	1	1	{'Oslo': 0.23, '?': 0.07, '______': 0.08, '__': 0.05}	0	0.230469	0	1	key	key|target	0.9	TRUE	TRUE	TRUE	target	{'oslo': 0.9}
Factual Knowledge	country_capital	Helsinki is to Finland as Sofia is to	bulgaria	Bulgaria	0.18	1	1	{'Bulgaria': 0.18, 'what': 0.14, 'which': 0.1, ':': 0.08, '?': 0.04}	0	0.18457	0	1	key	key|target	0.9	TRUE	TRUE	TRUE	target	{'bulgaria': 0.9}
Factual Knowledge	capital_world	Mozambique is to Maputo as Tunisia is to	tunis	__	0.14	0	1	{'__': 0.14, 'Tunis': 0.09, '': 0.05, '______': 0.05, '____': 0.04}	1	0.0864258	0.0561523	0.99999	key	key|target	0.9	TRUE	TRUE	TRUE	target	{'tunis': 0.9}
Factual Knowledge	capital_world	Algeria is to Algiers as Syria is to	damascus	Damascus	0.11	1	1	{'Damascus': 0.11, '?': 0.07, ':': 0.07, 'what': 0.06, '': 0.05}	0	0.105957	0	1	key	key|target	0.9	TRUE	TRUE	TRUE	target	{'damascus': 0.9}
Factual Knowledge	capital_world	Guyana is to Georgetown as Peru is to	lima	Lima	0.11	1	1	{'Lima': 0.11, '?': 0.08, ':': 0.06, '______': 0.06}	0	0.112793	0	1	key	key|target	0.9	TRUE	TRUE	TRUE	target	{'lima': 0.9}
Factual Knowledge	capital_world	Vilnius is to Lithuania as Asmara is to	eritrea	E	0.74	0.5	0.5	{'E': 0.74, 'what': 0.05, '__': 0.03, '______': 0.02, 'which': 0.01}	32	0.00102234	0.737259	0.999681	key	key|target	0.9	TRUE	TRUE	TRUE	target	{'eritrea': 0.9}
Factual Knowledge	capital_world	Managua is to Nicaragua as Podgorica is to	montenegro	Mont	0.71	0.5	0.5	{'Mont': 0.71, 'what': 0.08, 'which': 0.03, '__': 0.02, '?': 0.01}	0	0.714844	0	1	key	key|target	0.9	TRUE	TRUE	TRUE	target	{'montenegro': 0.9}
Factual Knowledge	capital_world	Mozambique is to Maputo as Uruguay is to	montevideo	Mont	0.29	0.5	0.5	{'Mont': 0.29, '______': 0.06, '': 0.05, '__': 0.04, ':': 0.03}	0	0.287109	0	1	key	key|target	0.9	TRUE	TRUE	TRUE	target	{'montevideo': 0.9}
Factual Knowledge	capital_world	Mozambique is to Maputo as Estonia is to	tallinn	Tall	0.26	0.5	0.5	{'Tall': 0.26, ':': 0.07, '______': 0.04, 'what': 0.04, '?': 0.03}	0	0.257812	0	1	key	key|target	0.9	TRUE	TRUE	TRUE	target	{'tallinn': 0.9}
Factual Knowledge	name_occupation	dante is to poet as michelangelo is to	sculptor	sculpt	0.24	0.5	0.5	{'sculpt': 0.24, 'artist': 0.18, 'painter': 0.06, 'a': 0.04, '?': 0.03}	0	0.235352	0	1	key	key|target	0.9	TRUE	TRUE	TRUE	target	{'sculptor': 0.9}
Factual Knowledge	capital_world	Ukraine is to Kiev as Nicaragua is to	managua	Man	0.24	0.5	0.5	{'Man': 0.24, '_____': 0.13, '______': 0.1, '____': 0.07, '__': 0.07}	0	0.235352	0	1	key	key|target	0.9	TRUE	TRUE	TRUE	target	{'managua': 0.9}
Factual Knowledge	capital_world	Somalia is to Mogadishu as Oman is to	muscat	?	0.23	0	0.5	{'?': 0.08, '__': 0.06, '______': 0.05, 'Mus': 0.04}	4	0.0444336	0.181152	0.99996	key	key|target	0.9	TRUE	TRUE	TRUE	target	{'muscat': 0.9}
Factual Knowledge	capital_world	Mozambique is to Maputo as Libya is to	tripoli	Trip	0.21	0.5	0.5	{'Trip': 0.21, '__': 0.05, '______': 0.04, '': 0.04, '"': 0.04}	0	0.213867	0	1	key	key|target	0.9	TRUE	TRUE	TRUE	target	{'tripoli': 0.9}
Factual Knowledge	capital_world	Tajikistan is to Dushanbe as Rwanda is to	kigali	K	0.2	0.5	0.5	{'K': 0.2, '______': 0.08, '__': 0.07, ':': 0.04, '': 0.04}	636	2.01464e-05	0.204081	0.993662	key	key|target	0.9	TRUE	TRUE	TRUE	target	{'kigali': 0.9}
Factual Knowledge	capital_world	Dublin is to Ireland as Funafuti is to	tuvalu	Tu	0.14	0.5	0.5	{'Tu': 0.14, 'what': 0.09, '_____': 0.05, '?': 0.05, '__': 0.05}	0	0.137695	0	1	key	key|target	0.9	TRUE	TRUE	TRUE	target	{'tuvalu': 0.9}
Factual Knowledge	capital_world	Senegal is to Dakar as Vietnam is to	hanoi	:	0.13	0	0.5	{':': 0.13, '______': 0.08, 'H': 0.07, 'Ho': 0.06, '?': 0.06}	42	0.00292969	0.125977	0.999581	key	key|target	0.9	TRUE	TRUE	TRUE	target	{'hanoi': 0.9}
Factual Knowledge	capital_world	Ukraine is to Kiev as Oman is to	muscat	____	0.11	0	0.5	{'____': 0.11, '__': 0.1, '______': 0.06, '_____': 0.06, 'Mus': 0.05}	4	0.0512695	0.0571289	0.99996	key	key|target	0.9	TRUE	TRUE	TRUE	target	{'muscat': 0.9}
Factual Knowledge	capital_world	Estonia is to Tallinn as Liechtenstein is to	vaduz	Vad	0.11	0.5	0.5	{'Vad': 0.11, '?': 0.09, '__': 0.08, '______': 0.05, ':': 0.05}	0	0.106934	0	1	key	key|target	0.9	TRUE	TRUE	TRUE	target	{'vaduz': 0.9}
Factual Knowledge	UK_city_county	lancaster is to lancashire as newport is to	gwent	w	0.21	0	0	{'w': 0.21, 'mon': 0.1, 'south': 0.07, 'som': 0.06, 'which': 0.05}	137	0.000339508	0.208645	0.998635	key	key|target	0.9	TRUE	TRUE	TRUE	target	{'gwent': 0.9}
Factual Knowledge	capital_world	Ireland is to Dublin as Oman is to	muscat	____	0.1	0	0	{'____': 0.1, '__': 0.1, '______': 0.07, '_____': 0.07, '___': 0.06}	9	0.0234375	0.081543	0.99991	key	key|target	0.9	TRUE	TRUE	TRUE	target	{'muscat': 0.9}
Factual Knowledge	country_capital	Beirut is to Lebanon as Havana is to	cuba	Cuba	0.96	1	1	{'Cuba': 0.96, '': 0.0, 'the': 0.0, '______': 0.0}	0	0.964844	0	1	key	key|target	0.89	TRUE	TRUE	TRUE	target	{'cuba': 0.89}
Factual Knowledge	capital_world	Beirut is to Lebanon as Havana is to	cuba	Cuba	0.96	1	1	{'Cuba': 0.96, '': 0.0, 'the': 0.0, '______': 0.0}	0	0.964844	0	1	key	key|target	0.89	TRUE	TRUE	TRUE	target	{'cuba': 0.89}
Factual Knowledge	capital_world	Apia is to Samoa as Athens is to	greece	Greece	0.95	1	1	{'Greece': 0.95, 'the': 0.02, 'ancient': 0.01, 'Ancient': 0.0, 'Europe': 0.0}	0	0.945312	0	1	key	key|target	0.89	TRUE	TRUE	TRUE	target	{'greece': 0.89}
Factual Knowledge	country_capital	Beirut is to Lebanon as Lisbon is to	portugal	Portugal	0.93	1	1	{'Portugal': 0.93, '': 0.01, 'what': 0.0, '__': 0.0, '______': 0.0}	0	0.925781	0	1	key	key|target	0.89	TRUE	TRUE	TRUE	target	{'portugal': 0.89}
Factual Knowledge	capital_world	Suva is to Fiji as Tripoli is to	libya	Libya	0.93	1	1	{'Libya': 0.93, 'Ly': 0.01, 'Lebanon': 0.01, '': 0.01, 'the': 0.0}	0	0.933594	0	1	key	key|target	0.89	TRUE	TRUE	TRUE	target	{'libya': 0.89}
Factual Knowledge	capital_world	Baku is to Azerbaijan as Copenhagen is to	denmark	Denmark	0.93	1	1	{'Denmark': 0.93, 'the': 0.0, '__': 0.0, 'Scandin': 0.0, '______': 0.0}	0	0.933594	0	1	key	key|target	0.89	TRUE	TRUE	TRUE	target	{'denmark': 0.89}
Factual Knowledge	capital_world	Havana is to Cuba as Athens is to	greece	Greece	0.92	1	1	{'Greece': 0.92, '__': 0.01, '______': 0.01, '': 0.0, '...': 0.0}	0	0.921875	0	1	key	key|target	0.89	TRUE	TRUE	TRUE	target	{'greece': 0.89}
Factual Knowledge	capital_world	Antananarivo is to Madagascar as Cairo is to	egypt	Egypt	0.91	1	1	{'Egypt': 0.91, '__': 0.01, '______': 0.01, 'the': 0.01, 'Africa': 0.0}	0	0.914062	0	1	key	key|target	0.89	TRUE	TRUE	TRUE	target	{'egypt': 0.89}
Factual Knowledge	capital_world	Yerevan is to Armenia as Canberra is to	australia	Australia	0.91	1	1	{'Australia': 0.91, '__': 0.01, 'the': 0.01, '______': 0.01, 'what': 0.01}	0	0.90625	0	1	key	key|target	0.89	TRUE	TRUE	TRUE	target	{'australia': 0.89}
Factual Knowledge	capital_world	Yerevan is to Armenia as Bucharest is to	romania	Romania	0.91	1	1	{'Romania': 0.91, '______': 0.01, '__': 0.01, 'what': 0.01, '': 0.0}	0	0.910156	0	1	key	key|target	0.89	TRUE	TRUE	TRUE	target	{'romania': 0.89}
Factual Knowledge	country_capital	Conakry is to Guinea as Oslo is to	norway	Norway	0.89	1	1	{'Norway': 0.89, '__': 0.01, '______': 0.01, 'Sweden': 0.01, '': 0.0}	0	0.894531	0	1	key	key|target	0.89	TRUE	TRUE	TRUE	target	{'norway': 0.89}
Factual Knowledge	capital_world	Skopje is to Macedonia as Suva is to	fiji	Fiji	0.87	1	1	{'Fiji': 0.87, '______': 0.01, 'the': 0.01, 'what': 0.01, '__': 0.01}	0	0.867188	0	1	key	key|target	0.89	TRUE	TRUE	TRUE	target	{'fiji': 0.89}
Factual Knowledge	country_capital	Belgrade is to Serbia as Canberra is to	australia	Australia	0.86	1	1	{'Australia': 0.86, '______': 0.02, '__': 0.02, 'what': 0.01, '_____': 0.0}	0	0.859375	0	1	key	key|target	0.89	TRUE	TRUE	TRUE	target	{'australia': 0.89}
Factual Knowledge	capital_world	Kingston is to Jamaica as Rabat is to	morocco	Morocco	0.86	1	1	{'Morocco': 0.86, 'what': 0.01, '__': 0.01, 'Mor': 0.01, '______': 0.01}	0	0.855469	0	1	key	key|target	0.89	TRUE	TRUE	TRUE	target	{'morocco': 0.89}
Factual Knowledge	capital_world	Belgrade is to Serbia as Canberra is to	australia	Australia	0.86	1	1	{'Australia': 0.86, '______': 0.02, '__': 0.02, 'what': 0.01, '_____': 0.0}	0	0.859375	0	1	key	key|target	0.89	TRUE	TRUE	TRUE	target	{'australia': 0.89}
Factual Knowledge	capital_world	Caracas is to Venezuela as Copenhagen is to	denmark	Denmark	0.86	1	1	{'Denmark': 0.86, '__': 0.02, '______': 0.01, ':': 0.01, 'what': 0.01}	0	0.855469	0	1	key	key|target	0.89	TRUE	TRUE	TRUE	target	{'denmark': 0.89}
Factual Knowledge	capital_world	Jakarta is to Indonesia as Kigali is to	rwanda	Rwanda	0.84	1	1	{'Rwanda': 0.84, 'what': 0.02, '': 0.01, 'Bur': 0.01, '______': 0.01}	0	0.835938	0	1	key	key|target	0.89	TRUE	TRUE	TRUE	target	{'rwanda': 0.89}
Factual Knowledge	capital_world	Madagascar is to Antananarivo as Denmark is to	copenhagen	Copenhagen	0.84	1	1	{'Copenhagen': 0.84, '__': 0.01, ':': 0.01, '______': 0.01}	0	0.835938	0	1	key	key|target	0.89	TRUE	TRUE	TRUE	target	{'copenhagen': 0.89}
Factual Knowledge	capital_world	Harare is to Zimbabwe as Lisbon is to	portugal	Portugal	0.83	1	1	{'Portugal': 0.83, '__': 0.03, 'what': 0.02, '______': 0.02, 'which': 0.01}	0	0.828125	0	1	key	key|target	0.89	TRUE	TRUE	TRUE	target	{'portugal': 0.89}
Factual Knowledge	capital_world	Nuuk is to Greenland as Tripoli is to	libya	Libya	0.76	1	1	{'Libya': 0.76, ':': 0.01, '___': 0.01, 'what': 0.01}	0	0.761719	0	1	key	key|target	0.89	TRUE	TRUE	TRUE	target	{'libya': 0.89}
Factual Knowledge	capital_world	Kampala is to Uganda as Lisbon is to	portugal	Portugal	0.76	1	1	{'Portugal': 0.76, '__': 0.04, '______': 0.03, 'what': 0.02, '_____': 0.01}	0	0.757812	0	1	key	key|target	0.89	TRUE	TRUE	TRUE	target	{'portugal': 0.89}
Factual Knowledge	capital_world	Montevideo is to Uruguay as Stockholm is to	sweden	Sweden	0.73	1	1	{'Sweden': 0.73, '______': 0.03, '__': 0.03, 'what': 0.02, 'Scandin': 0.01}	0	0.730469	0	1	key	key|target	0.89	TRUE	TRUE	TRUE	target	{'sweden': 0.89}
Factual Knowledge	capital_world	Tirana is to Albania as Amman is to	jordan	Jordan	0.66	1	1	{'Jordan': 0.66, '__': 0.07, 'what': 0.05, '______': 0.04, '___': 0.03}	0	0.660156	0	1	key	key|target	0.89	TRUE	TRUE	TRUE	target	{'jordan': 0.89}
Factual Knowledge	capital_world	Luanda is to Angola as Oslo is to	norway	Norway	0.64	1	1	{'Norway': 0.64, '______': 0.08, '__': 0.06, 'which': 0.05, 'what': 0.02}	0	0.636719	0	1	key	key|target	0.89	TRUE	TRUE	TRUE	target	{'norway': 0.89}
Factual Knowledge	capital_world	Paramaribo is to Suriname as Stockholm is to	sweden	Sweden	0.62	1	1	{'Sweden': 0.62, 'what': 0.07, 'which': 0.04, '__': 0.04, ':': 0.04}	0	0.625	0	1	key	key|target	0.89	TRUE	TRUE	TRUE	target	{'sweden': 0.89}
Factual Knowledge	capital_world	Baku is to Azerbaijan as Harare is to	zimbabwe	Zimbabwe	0.62	1	1	{'Zimbabwe': 0.62, 'what': 0.06, '______': 0.04, '__': 0.04, ':': 0.02}	0	0.617188	0	1	key	key|target	0.89	TRUE	TRUE	TRUE	target	{'zimbabwe': 0.89}
Factual Knowledge	country_capital	Islamabad is to Pakistan as Manila is to	philippines	the	0.57	0	1	{'the': 0.57, '______': 0.08, '__': 0.06, 'Philippines': 0.03, 'what': 0.03}	3	0.0319824	0.53833	0.99997	key	key|target	0.89	TRUE	TRUE	TRUE	target	{'philippines': 0.89}
Factual Knowledge	capital_world	Islamabad is to Pakistan as Manila is to	philippines	the	0.57	0	1	{'the': 0.57, '______': 0.08, '__': 0.06, 'Philippines': 0.03, 'what': 0.03}	3	0.0319824	0.53833	0.99997	key	key|target	0.89	TRUE	TRUE	TRUE	target	{'philippines': 0.89}
Factual Knowledge	capital_world	Paris is to France as Tallinn is to	estonia	Estonia	0.56	1	1	{'Estonia': 0.56, 'what': 0.09, 'which': 0.05, '__': 0.02, '______': 0.02}	0	0.558594	0	1	key	key|target	0.89	TRUE	TRUE	TRUE	target	{'estonia': 0.89}
Factual Knowledge	capital_world	Havana is to Cuba as Bern is to	switzerland	Switzerland	0.52	1	1	{'Switzerland': 0.52, 'what': 0.06, '__': 0.03, 'which': 0.03, '______': 0.02}	0	0.523438	0	1	key	key|target	0.89	TRUE	TRUE	TRUE	target	{'switzerland': 0.89}
Factual Knowledge	country_capital	Kabul is to Afghanistan as Madrid is to	spain	Spain	0.5	1	1	{'Spain': 0.5, 'what': 0.07, '______': 0.06, '__': 0.03, '_____': 0.03}	0	0.503906	0	1	key	key|target	0.89	TRUE	TRUE	TRUE	target	{'spain': 0.89}
Factual Knowledge	capital_world	Kabul is to Afghanistan as Madrid is to	spain	Spain	0.5	1	1	{'Spain': 0.5, 'what': 0.07, '______': 0.06, '__': 0.03, '_____': 0.03}	0	0.503906	0	1	key	key|target	0.89	TRUE	TRUE	TRUE	target	{'spain': 0.89}
Factual Knowledge	country_capital	Budapest is to Hungary as Tehran is to	iran	Iran	0.49	1	1	{'Iran': 0.49, '______': 0.06, 'what': 0.06, '__': 0.04, '___': 0.03}	0	0.488281	0	1	key	key|target	0.89	TRUE	TRUE	TRUE	target	{'iran': 0.89}
Factual Knowledge	country_capital	Dhaka is to Bangladesh as Hanoi is to	vietnam	Vietnam	0.49	1	1	{'Vietnam': 0.49, '______': 0.07, '__': 0.03, 'what': 0.03, '____': 0.03}	0	0.486328	0	1	key	key|target	0.89	TRUE	TRUE	TRUE	target	{'vietnam': 0.89}
Factual Knowledge	capital_world	Dhaka is to Bangladesh as Hanoi is to	vietnam	Vietnam	0.49	1	1	{'Vietnam': 0.49, '______': 0.07, '__': 0.03, 'what': 0.03, '____': 0.03}	0	0.486328	0	1	key	key|target	0.89	TRUE	TRUE	TRUE	target	{'vietnam': 0.89}
Factual Knowledge	name_occupation	hume is to philosopher as newton is to	scientist	scientist	0.48	1	1	{'scientist': 0.48, 'physicist': 0.2, 'physics': 0.02, 'mathematic': 0.02, '?': 0.01}	0	0.480469	0	1	key	key|target	0.89	TRUE	TRUE	TRUE	target	{'scientist': 0.89}
Factual Knowledge	country_capital	Kabul is to Afghanistan as Kingston is to	jamaica	Jamaica	0.46	1	1	{'Jamaica': 0.46, '__': 0.08, '______': 0.04, 'what': 0.03, 'which': 0.02}	0	0.462891	0	1	key	key|target	0.89	TRUE	TRUE	TRUE	target	{'jamaica': 0.89}
Factual Knowledge	capital_world	Skopje is to Macedonia as Taipei is to	taiwan	Taiwan	0.46	1	1	{'Taiwan': 0.46, 'China': 0.23, 'the': 0.06, '__': 0.02, '______': 0.02}	0	0.455078	0	1	key	key|target	0.89	TRUE	TRUE	TRUE	target	{'taiwan': 0.89}
Factual Knowledge	capital_world	Kabul is to Afghanistan as Kingston is to	jamaica	Jamaica	0.46	1	1	{'Jamaica': 0.46, '__': 0.08, '______': 0.04, 'what': 0.03, 'which': 0.02}	0	0.462891	0	1	key	key|target	0.89	TRUE	TRUE	TRUE	target	{'jamaica': 0.89}
Factual Knowledge	capital_world	Helsinki is to Finland as Kampala is to	uganda	Uganda	0.41	1	1	{'Uganda': 0.41, '______': 0.08, 'what': 0.06, '__': 0.06, '_____': 0.03}	0	0.412109	0	1	key	key|target	0.89	TRUE	TRUE	TRUE	target	{'uganda': 0.89}
Factual Knowledge	name_occupation	hegel is to philosopher as moses is to	prophet	prophet	0.4	1	1	{'prophet': 0.4, 'religious': 0.03, 'religion': 0.03, 'law': 0.03, 'jew': 0.02}	0	0.398438	0	1	key	key|target	0.89	TRUE	TRUE	TRUE	target	{'prophet': 0.89}
Factual Knowledge	country_capital	Nairobi is to Kenya as Tbilisi is to	georgia	Georgia	0.39	1	1	{'Georgia': 0.39, 'what': 0.07, 'which': 0.04, '__': 0.04, '____': 0.04}	0	0.386719	0	1	key	key|target	0.89	TRUE	TRUE	TRUE	target	{'georgia': 0.89}
Factual Knowledge	capital_world	Nairobi is to Kenya as Tbilisi is to	georgia	Georgia	0.39	1	1	{'Georgia': 0.39, 'what': 0.07, 'which': 0.04, '__': 0.04, '____': 0.04}	0	0.386719	0	1	key	key|target	0.89	TRUE	TRUE	TRUE	target	{'georgia': 0.89}
Factual Knowledge	country_capital	Indonesia is to Jakarta as Japan is to	tokyo	Tokyo	0.36	1	1	{'Tokyo': 0.36, ':': 0.05, '______': 0.05, 'A': 0.04, '': 0.04}	0	0.361328	0	1	key	key|target	0.89	TRUE	TRUE	TRUE	target	{'tokyo': 0.89}
Factual Knowledge	capital_world	Quito is to Ecuador as Sofia is to	bulgaria	Bulgaria	0.35	1	1	{'Bulgaria': 0.35, 'what': 0.15, '______': 0.05, ':': 0.04, '__': 0.04}	0	0.345703	0	1	key	key|target	0.89	TRUE	TRUE	TRUE	target	{'bulgaria': 0.89}
Factual Knowledge	capital_world	Honduras is to Tegucigalpa as Iran is to	tehran	Tehran	0.33	1	1	{'Tehran': 0.33, '__': 0.09, 'what': 0.05, '______': 0.04, '?': 0.03}	0	0.326172	0	1	key	key|target	0.89	TRUE	TRUE	TRUE	target	{'tehran': 0.89}
Factual Knowledge	country_capital	Ukraine is to Kiev as Sweden is to	stockholm	Stockholm	0.29	1	1	{'Stockholm': 0.29, '______': 0.08, '_____': 0.05, ':': 0.05, 'what': 0.04}	0	0.292969	0	1	key	key|target	0.89	TRUE	TRUE	TRUE	target	{'stockholm': 0.89}
Factual Knowledge	capital_world	Santiago is to Chile as Skopje is to	macedonia	what	0.24	0	1	{'what': 0.24, 'Macedonia': 0.16, 'which': 0.07, '?': 0.04, '__': 0.03}	1	0.157227	0.0859375	0.99999	key	key|target	0.89	TRUE	TRUE	TRUE	target	{'macedonia': 0.89}
Factual Knowledge	capital_world	Nepal is to Kathmandu as Portugal is to	lisbon	Lisbon	0.24	1	1	{'Lisbon': 0.24, '______': 0.07, '__': 0.07, ':': 0.03}	0	0.242188	0	1	key	key|target	0.89	TRUE	TRUE	TRUE	target	{'lisbon': 0.89}
Factual Knowledge	capital_world	Niamey is to Niger as Taipei is to	taiwan	Taiwan	0.21	1	1	{'Taiwan': 0.21, ':': 0.06, '__': 0.06, '______': 0.05}	0	0.213867	0	1	key	key|target	0.89	TRUE	TRUE	TRUE	target	{'taiwan': 0.89}
Factual Knowledge	country_capital	Serbia is to Belgrade as Norway is to	oslo	Oslo	0.19	1	1	{'Oslo': 0.19, '______': 0.09, '?': 0.03, '__': 0.05}	0	0.1875	0	1	key	key|target	0.89	TRUE	TRUE	TRUE	target	{'oslo': 0.89}
Factual Knowledge	country_capital	Belgium is to Brussels as Philippines is to	manila	______	0.18	0	1	{'______': 0.18, 'Manila': 0.15, '__': 0.08, '____': 0.07, '___': 0.05}	1	0.152344	0.03125	0.99999	key	key|target	0.89	TRUE	TRUE	TRUE	target	{'manila': 0.89}
Factual Knowledge	capital_world	Havana is to Cuba as Khartoum is to	sudan	Sudan	0.18	1	1	{'Sudan': 0.18, 'what': 0.15, '__': 0.09, '______': 0.07, '___': 0.07}	0	0.182617	0	1	key	key|target	0.89	TRUE	TRUE	TRUE	target	{'sudan': 0.89}
Factual Knowledge	country_language	Austria is to German as Iran is to	persian	Arabic	0.17	0	1	{'Arabic': 0.17, 'Persian': 0.15, '______': 0.13, 'F': 0.08, '_____': 0.05}	1	0.152344	0.0205078	0.99999	key	key|target	0.89	TRUE	TRUE	TRUE	target	{'persian': 0.89}
Factual Knowledge	name_occupation	dante is to poet as hitler is to	dictator	politician	0.17	0	1	{'politician': 0.17, 'dictator': 0.14, 'states': 0.05, 'leader': 0.04, 'what': 0.02}	1	0.142578	0.0292969	0.99999	key	key|target	0.89	TRUE	TRUE	TRUE	target	{'dictator': 0.89}
Factual Knowledge	capital_world	Senegal is to Dakar as Syria is to	damascus	Damascus	0.14	1	1	{'Damascus': 0.14, ':': 0.08, '______': 0.06}	0	0.135742	0	1	key	key|target	0.89	TRUE	TRUE	TRUE	target	{'damascus': 0.89}
Factual Knowledge	name_occupation	balzac is to novelist as hitler is to	dictator	dictator	0.13	1	1	{'dictator': 0.13, 'politician': 0.1, 'states': 0.03, ':': 0.03, 'leader': 0.03}	0	0.128906	0	1	key	key|target	0.89	TRUE	TRUE	TRUE	target	{'dictator': 0.89}
Factual Knowledge	capital_world	Luanda is to Angola as Muscat is to	oman	?	0.13	0	1	{'?': 0.13, 'Oman': 0.1, '______': 0.1, '_____': 0.09, '__': 0.06}	2	0.0957031	0.0390625	0.99998	key	key|target	0.89	TRUE	TRUE	TRUE	target	{'oman': 0.89}
Factual Knowledge	country_capital	Brussels is to Belgium as Sofia is to	bulgaria	Bulgaria	0.12	1	1	{'Bulgaria': 0.12, 'what': 0.1, 'which': 0.1, ':': 0.09, '______': 0.06}	0	0.117188	0	1	key	key|target	0.89	TRUE	TRUE	TRUE	target	{'bulgaria': 0.89}
Factual Knowledge	capital_world	Beirut is to Lebanon as Dushanbe is to	tajikistan	Taj	0.66	0.5	0.5	{'Taj': 0.66, 'what': 0.06, 'which': 0.05, '?': 0.01, '__': 0.01}	0	0.65625	0	1	key	key|target	0.89	TRUE	TRUE	TRUE	target	{'tajikistan': 0.89}
Factual Knowledge	capital_world	Chile is to Santiago as Lithuania is to	vilnius	Vil	0.25	0.5	0.5	{'Vil': 0.25, '______': 0.08, '__': 0.06, '____': 0.05, ':': 0.03}	0	0.248047	0	1	key	key|target	0.89	TRUE	TRUE	TRUE	target	{'vilnius': 0.89}
Factual Knowledge	capital_world	Germany is to Berlin as Burundi is to	bujumbura	B	0.24	0.5	0.5	{'B': 0.24, '______': 0.11, '_____': 0.07, '__': 0.06, 'K': 0.04}	222	0.000149727	0.243014	0.997788	key	key|target	0.89	TRUE	TRUE	TRUE	target	{'bujumbura': 0.89}
Factual Knowledge	capital_world	Riga is to Latvia as Asmara is to	eritrea	what	0.22	0	0.5	{'what': 0.22, 'E': 0.19, '?': 0.1, 'which': 0.09, '__': 0.04}	26	0.00482178	0.210999	0.999741	key	key|target	0.89	TRUE	TRUE	TRUE	target	{'eritrea': 0.89}
Factual Knowledge	capital_world	Budapest is to Hungary as Georgetown is to	guyana	the	0.21	0	0.5	{'the': 0.21, 'Guy': 0.13, 'Malaysia': 0.06, 'Washington': 0.06, 'what': 0.06}	1	0.126953	0.0820312	0.99999	key	key|target	0.89	TRUE	TRUE	TRUE	target	{'guyana': 0.89}
Factual Knowledge	capital_world	Tirana is to Albania as Banjul is to	gambia	The	0.19	0	0.5	{'The': 0.19, 'G': 0.17, 'the': 0.08, '': 0.07, 'what': 0.06}	77	0.000728607	0.193607	0.999233	key	key|target	0.89	TRUE	TRUE	TRUE	target	{'gambia': 0.89}
Factual Knowledge	capital_world	Mozambique is to Maputo as Ecuador is to	quito	__	0.14	0	0.5	{'__': 0.14, 'Q': 0.13, '______': 0.11, ':': 0.06, '_____': 0.05}	752	1.5974e-05	0.136703	0.992506	key	key|target	0.89	TRUE	TRUE	TRUE	target	{'quito': 0.89}
Factual Knowledge	capital_world	Fiji is to Suva as Libya is to	tripoli	Trip	0.13	0.5	0.5	{'Trip': 0.13, ':': 0.06, '__': 0.05}	0	0.126953	0	1	key	key|target	0.89	TRUE	TRUE	TRUE	target	{'tripoli': 0.89}
Factual Knowledge	capital_world	Uzbekistan is to Tashkent as Liechtenstein is to	vaduz	Vad	0.12	0.5	0.5	{'Vad': 0.12, '__': 0.06, '______': 0.06, ':': 0.05, 'what': 0.05}	0	0.123535	0	1	key	key|target	0.89	TRUE	TRUE	TRUE	target	{'vaduz': 0.89}
Factual Knowledge	UK_city_county	newcastle is to northumberland as oxford is to	oxfordshire	berk	0.1	0	0.5	{'berk': 0.1, '______': 0.07, 'what': 0.07, 'wilt': 0.06, 'o': 0.04}	24	0.00891113	0.0936279	0.999761	key	key|target	0.89	TRUE	TRUE	TRUE	target	{'oxfordshire': 0.89}
Factual Knowledge	capital_world	Algeria is to Algiers as Belize is to	belmopan	______	0.1	0	0.5	{'______': 0.1, '__': 0.09, 'Bel': 0.07, '?': 0.07, ':': 0.05}	2	0.0703125	0.0258789	0.99998	key	key|target	0.89	TRUE	TRUE	TRUE	target	{'belmopan': 0.89}
Factual Knowledge	country_capital	Iraq is to Baghdad as Georgia is to	tbilisi	Atlanta	0.42	0	0	{'Atlanta': 0.42, '______': 0.06, '__': 0.06, ':': 0.04, '?"': 0.02}	395	3.43323e-05	0.417934	0.996064	key	key|target	0.89	TRUE	TRUE	TRUE	target	{'tbilisi': 0.89}
Factual Knowledge	UK_city_county	gloucester is to gloucestershire as newport is to	gwent	which	0.15	0	0	{'which': 0.15, 'new': 0.12, 'mon': 0.11, 'what': 0.09, 'w': 0.05}	275	5.67436e-05	0.146428	0.99726	key	key|target	0.89	TRUE	TRUE	TRUE	target	{'gwent': 0.89}
Factual Knowledge	capital_world	Sudan is to Khartoum as Philippines is to	manila	?	0.14	0	0	{'?': 0.12, '"': 0.08, '?"': 0.07, '______': 0.07}	8	0.0290527	0.109619	0.99992	key	key|target	0.89	TRUE	TRUE	TRUE	target	{'manila': 0.89}
Factual Knowledge	capital_world	Gabon is to Libreville as Norway is to	oslo	?	0.12	0	0	{'?': 0.06, ':': 0.07, '______': 0.06}	10	0.0222168	0.0979004	0.9999	key	key|target	0.89	TRUE	TRUE	TRUE	target	{'oslo': 0.89}
Factual Knowledge	capital_world	Baku is to Azerbaijan as Canberra is to	australia	Australia	0.94	1	1	{'Australia': 0.94, '__': 0.01, '______': 0.01, 'what': 0.0, 'the': 0.0}	0	0.9375	0	1	key	key|target	0.88	TRUE	TRUE	TRUE	target	{'australia': 0.88}
Factual Knowledge	capital_world	Accra is to Ghana as Canberra is to	australia	Australia	0.94	1	1	{'Australia': 0.94, '__': 0.01, '______': 0.01, 'what': 0.0, '': 0.0}	0	0.9375	0	1	key	key|target	0.88	TRUE	TRUE	TRUE	target	{'australia': 0.88}
Factual Knowledge	country_capital	Brussels is to Belgium as Canberra is to	australia	Australia	0.93	1	1	{'Australia': 0.93, '______': 0.01, '__': 0.01, 'what': 0.0, '': 0.0}	0	0.929688	0	1	key	key|target	0.88	TRUE	TRUE	TRUE	target	{'australia': 0.88}
Factual Knowledge	country_capital	Helsinki is to Finland as Ottawa is to	canada	Canada	0.93	1	1	{'Canada': 0.93, '__': 0.01, '______': 0.01, 'what': 0.0, 'the': 0.0}	0	0.933594	0	1	key	key|target	0.88	TRUE	TRUE	TRUE	target	{'canada': 0.88}
Factual Knowledge	capital_world	Algiers is to Algeria as Cairo is to	egypt	Egypt	0.93	1	1	{'Egypt': 0.93, 'Eq': 0.01, '______': 0.01, '__': 0.01, 'what': 0.0}	0	0.929688	0	1	key	key|target	0.88	TRUE	TRUE	TRUE	target	{'egypt': 0.88}
Factual Knowledge	capital_world	Helsinki is to Finland as Ottawa is to	canada	Canada	0.93	1	1	{'Canada': 0.93, '__': 0.01, '______': 0.01, 'what': 0.0, 'the': 0.0}	0	0.933594	0	1	key	key|target	0.88	TRUE	TRUE	TRUE	target	{'canada': 0.88}
Factual Knowledge	capital_world	Brussels is to Belgium as Canberra is to	australia	Australia	0.93	1	1	{'Australia': 0.93, '______': 0.01, '__': 0.01, 'what': 0.0, '': 0.0}	0	0.929688	0	1	key	key|target	0.88	TRUE	TRUE	TRUE	target	{'australia': 0.88}
Factual Knowledge	country_capital	Kiev is to Ukraine as Oslo is to	norway	Norway	0.91	1	1	{'Norway': 0.91, '______': 0.01, 'Sweden': 0.01, '__': 0.01, 'what': 0.0}	0	0.914062	0	1	key	key|target	0.88	TRUE	TRUE	TRUE	target	{'norway': 0.88}
Factual Knowledge	capital_world	Kiev is to Ukraine as Oslo is to	norway	Norway	0.91	1	1	{'Norway': 0.91, '______': 0.01, 'Sweden': 0.01, '__': 0.01, 'what': 0.0}	0	0.914062	0	1	key	key|target	0.88	TRUE	TRUE	TRUE	target	{'norway': 0.88}
Factual Knowledge	capital_world	Algiers is to Algeria as Athens is to	greece	Greece	0.91	1	1	{'Greece': 0.91, '__': 0.01, '______': 0.01, 'what': 0.0, '_____': 0.0}	0	0.910156	0	1	key	key|target	0.88	TRUE	TRUE	TRUE	target	{'greece': 0.88}
Factual Knowledge	capital_world	Stockholm is to Sweden as Canberra is to	australia	Australia	0.91	1	1	{'Australia': 0.91, '______': 0.01, '__': 0.01, 'what': 0.0, 'the': 0.0}	0	0.910156	0	1	key	key|target	0.88	TRUE	TRUE	TRUE	target	{'australia': 0.88}
Factual Knowledge	capital_world	Beirut is to Lebanon as Kathmandu is to	nepal	Nepal	0.88	1	1	{'Nepal': 0.88, '______': 0.01, '__': 0.01, '': 0.01, 'the': 0.01}	0	0.882812	0	1	key	key|target	0.88	TRUE	TRUE	TRUE	target	{'nepal': 0.88}
Factual Knowledge	capital_world	Accra is to Ghana as Bucharest is to	romania	Romania	0.84	1	1	{'Romania': 0.84, '______': 0.02, 'what': 0.01, '__': 0.01, 'which': 0.01}	0	0.839844	0	1	key	key|target	0.88	TRUE	TRUE	TRUE	target	{'romania': 0.88}
Factual Knowledge	country_capital	Helsinki is to Finland as Jakarta is to	indonesia	Indonesia	0.81	1	1	{'Indonesia': 0.81, 'what': 0.02, '______': 0.01, 'Java': 0.01, '?': 0.01}	0	0.808594	0	1	key	key|target	0.88	TRUE	TRUE	TRUE	target	{'indonesia': 0.88}
Factual Knowledge	capital_world	Accra is to Ghana as Budapest is to	hungary	Hungary	0.81	1	1	{'Hungary': 0.81, '______': 0.03, '__': 0.01, 'Romania': 0.01, 'what': 0.01}	0	0.8125	0	1	key	key|target	0.88	TRUE	TRUE	TRUE	target	{'hungary': 0.88}
Factual Knowledge	capital_world	Helsinki is to Finland as Jakarta is to	indonesia	Indonesia	0.81	1	1	{'Indonesia': 0.81, 'what': 0.02, '______': 0.01, 'Java': 0.01, '?': 0.01}	0	0.808594	0	1	key	key|target	0.88	TRUE	TRUE	TRUE	target	{'indonesia': 0.88}
Factual Knowledge	capital_world	Taipei is to Taiwan as Tripoli is to	libya	Libya	0.77	1	1	{'Libya': 0.77, 'what': 0.02, '___': 0.02, ':': 0.02, '__': 0.01}	0	0.769531	0	1	key	key|target	0.88	TRUE	TRUE	TRUE	target	{'libya': 0.88}
Factual Knowledge	capital_world	Yerevan is to Armenia as Dhaka is to	bangladesh	Bangladesh	0.75	1	1	{'Bangladesh': 0.75, 'what': 0.04, '______': 0.03, '__': 0.02, ':': 0.02}	0	0.746094	0	1	key	key|target	0.88	TRUE	TRUE	TRUE	target	{'bangladesh': 0.88}
Factual Knowledge	country_capital	Belgrade is to Serbia as Lisbon is to	portugal	Portugal	0.71	1	1	{'Portugal': 0.71, '______': 0.04, '__': 0.03, 'what': 0.02, '_____': 0.02}	0	0.707031	0	1	key	key|target	0.88	TRUE	TRUE	TRUE	target	{'portugal': 0.88}
Factual Knowledge	country_capital	Manila is to Philippines as Oslo is to	norway	Norway	0.68	1	1	{'Norway': 0.68, '______': 0.03, '__': 0.03, 'what': 0.02, 'which': 0.02}	0	0.683594	0	1	key	key|target	0.88	TRUE	TRUE	TRUE	target	{'norway': 0.88}
Factual Knowledge	capital_world	Manila is to Philippines as Oslo is to	norway	Norway	0.68	1	1	{'Norway': 0.68, '______': 0.03, '__': 0.03, 'what': 0.02, 'which': 0.02}	0	0.683594	0	1	key	key|target	0.88	TRUE	TRUE	TRUE	target	{'norway': 0.88}
Factual Knowledge	capital_world	Brussels is to Belgium as Kigali is to	rwanda	Rwanda	0.66	1	1	{'Rwanda': 0.66, '______': 0.04, '__': 0.03, '': 0.02, 'what': 0.02}	0	0.664062	0	1	key	key|target	0.88	TRUE	TRUE	TRUE	target	{'rwanda': 0.88}
Factual Knowledge	capital_world	Kathmandu is to Nepal as Manila is to	philippines	the	0.65	0	1	{'the': 0.65, 'Philippines': 0.08, '______': 0.06, '__': 0.03, 'The': 0.02}	1	0.0751953	0.573242	0.99999	key	key|target	0.88	TRUE	TRUE	TRUE	target	{'philippines': 0.88}
Factual Knowledge	capital_world	Bishkek is to Kyrgyzstan as Bratislava is to	slovakia	Slovakia	0.65	1	1	{'Slovakia': 0.65, 'what': 0.06, ':': 0.05, 'which': 0.03, '______': 0.02}	0	0.652344	0	1	key	key|target	0.88	TRUE	TRUE	TRUE	target	{'slovakia': 0.88}
Factual Knowledge	capital_world	Montevideo is to Uruguay as Tegucigalpa is to	honduras	Honduras	0.59	1	1	{'Honduras': 0.59, 'what': 0.14, 'which': 0.03, '______': 0.03, '__': 0.03}	0	0.585938	0	1	key	key|target	0.88	TRUE	TRUE	TRUE	target	{'honduras': 0.88}
Factual Knowledge	name_occupation	spinoza is to philosopher as wagner is to	composer	composer	0.54	1	1	{'composer': 0.54, 'musician': 0.15, 'music': 0.13, 'opera': 0.05, 'composers': 0.01}	0	0.535156	0	1	key	key|target	0.88	TRUE	TRUE	TRUE	target	{'composer': 0.88}
Factual Knowledge	capital_world	Antananarivo is to Madagascar as Belmopan is to	belize	Belize	0.52	1	1	{'Belize': 0.52, 'what': 0.08, 'which': 0.05, ':': 0.04, '______': 0.03}	0	0.515625	0	1	key	key|target	0.88	TRUE	TRUE	TRUE	target	{'belize': 0.88}
Factual Knowledge	name_occupation	mencius is to philosopher as mozart is to	composer	composer	0.51	1	1	{'composer': 0.51, 'musician': 0.26, 'pian': 0.03, 'music': 0.02, '?': 0.01}	0	0.511719	0	1	key	key|target	0.88	TRUE	TRUE	TRUE	target	{'composer': 0.88}
Factual Knowledge	capital_world	Maputo is to Mozambique as Taipei is to	taiwan	Taiwan	0.5	1	1	{'Taiwan': 0.5, '__': 0.05, 'China': 0.04, 'the': 0.03, '______': 0.03}	0	0.503906	0	1	key	key|target	0.88	TRUE	TRUE	TRUE	target	{'taiwan': 0.88}
Factual Knowledge	country_capital	Kabul is to Afghanistan as Stockholm is to	sweden	Sweden	0.49	1	1	{'Sweden': 0.49, 'what': 0.08, '__': 0.04, '______': 0.04, 'which': 0.03}	0	0.488281	0	1	key	key|target	0.88	TRUE	TRUE	TRUE	target	{'sweden': 0.88}
Factual Knowledge	capital_world	Kabul is to Afghanistan as Stockholm is to	sweden	Sweden	0.49	1	1	{'Sweden': 0.49, 'what': 0.08, '__': 0.04, '______': 0.04, 'which': 0.03}	0	0.488281	0	1	key	key|target	0.88	TRUE	TRUE	TRUE	target	{'sweden': 0.88}
Factual Knowledge	name_occupation	hume is to philosopher as maxwell is to	physicist	physicist	0.46	1	1	{'physicist': 0.46, 'scientist': 0.19, 'physics': 0.06, 'physicists': 0.01, 'mathematic': 0.01}	0	0.462891	0	1	key	key|target	0.88	TRUE	TRUE	TRUE	target	{'physicist': 0.88}
Factual Knowledge	capital_world	Paramaribo is to Suriname as Tripoli is to	libya	Libya	0.46	1	1	{'Libya': 0.46, 'what': 0.27, ':': 0.04, '___': 0.03, '?': 0.03}	0	0.464844	0	1	key	key|target	0.88	TRUE	TRUE	TRUE	target	{'libya': 0.88}
Factual Knowledge	country_capital	Iraq is to Baghdad as Norway is to	oslo	Oslo	0.43	1	1	{'Oslo': 0.43, '______': 0.07, 'what': 0.04, '_____': 0.03, '____': 0.03}	0	0.433594	0	1	key	key|target	0.88	TRUE	TRUE	TRUE	target	{'oslo': 0.88}
Factual Knowledge	capital_world	Iraq is to Baghdad as Norway is to	oslo	Oslo	0.43	1	1	{'Oslo': 0.43, '______': 0.07, 'what': 0.04, '_____': 0.03, '____': 0.03}	0	0.433594	0	1	key	key|target	0.88	TRUE	TRUE	TRUE	target	{'oslo': 0.88}
Factual Knowledge	capital_world	Paramaribo is to Suriname as Sofia is to	bulgaria	what	0.41	0	1	{'what': 0.41, 'which': 0.12, 'Bulgaria': 0.1, '?': 0.09, '______': 0.05}	2	0.0986328	0.31543	0.99998	key	key|target	0.88	TRUE	TRUE	TRUE	target	{'bulgaria': 0.88}
Factual Knowledge	capital_world	Madagascar is to Antananarivo as Egypt is to	cairo	Cairo	0.41	1	1	{'Cairo': 0.41, '__': 0.08, '______': 0.07, ':': 0.03}	0	0.412109	0	1	key	key|target	0.88	TRUE	TRUE	TRUE	target	{'cairo': 0.88}
Factual Knowledge	country_capital	Budapest is to Hungary as Lisbon is to	portugal	Portugal	0.37	1	1	{'Portugal': 0.37, 'what': 0.08, '______': 0.07, 'which': 0.07, '__': 0.05}	0	0.367188	0	1	key	key|target	0.88	TRUE	TRUE	TRUE	target	{'portugal': 0.88}
Factual Knowledge	capital_world	Budapest is to Hungary as Lisbon is to	portugal	Portugal	0.37	1	1	{'Portugal': 0.37, 'what': 0.08, '______': 0.07, 'which': 0.07, '__': 0.05}	0	0.367188	0	1	key	key|target	0.88	TRUE	TRUE	TRUE	target	{'portugal': 0.88}
Factual Knowledge	capital_world	Quito is to Ecuador as Ankara is to	turkey	Turkey	0.35	1	1	{'Turkey': 0.35, '______': 0.13, '__': 0.1, 'what': 0.09, '____': 0.04}	0	0.345703	0	1	key	key|target	0.88	TRUE	TRUE	TRUE	target	{'turkey': 0.88}
Factual Knowledge	country_capital	Dhaka is to Bangladesh as Kingston is to	jamaica	Jamaica	0.33	1	1	{'Jamaica': 0.33, '__': 0.07, '______': 0.07, 'which': 0.04, ':': 0.04}	0	0.332031	0	1	key	key|target	0.88	TRUE	TRUE	TRUE	target	{'jamaica': 0.88}
Factual Knowledge	capital_world	Dhaka is to Bangladesh as Kingston is to	jamaica	Jamaica	0.33	1	1	{'Jamaica': 0.33, '__': 0.07, '______': 0.07, 'which': 0.04, ':': 0.04}	0	0.332031	0	1	key	key|target	0.88	TRUE	TRUE	TRUE	target	{'jamaica': 0.88}
Factual Knowledge	country_language	Ireland is to English as Netherlands is to	dutch	Dutch	0.32	1	1	{'Dutch': 0.32, '______': 0.12, '': 0.03, 'A': 0.02}	0	0.324219	0	1	key	key|target	0.88	TRUE	TRUE	TRUE	target	{'dutch': 0.88}
Factual Knowledge	country_capital	Bangladesh is to Dhaka as Iran is to	tehran	Tehran	0.29	1	1	{'Tehran': 0.29, '?': 0.12, ':': 0.05, '__': 0.04, '': 0.04}	0	0.285156	0	1	key	key|target	0.88	TRUE	TRUE	TRUE	target	{'tehran': 0.88}
Factual Knowledge	name_nationality	lenin is to Soviet as locke is to	english	American	0.22	0	1	{'American': 0.22, 'English': 0.11, 'British': 0.06, 'american': 0.04, 'America': 0.03}	1	0.113281	0.111328	0.99999	key	key|target	0.88	TRUE	TRUE	TRUE	target	{'english': 0.88}
Factual Knowledge	capital_world	Uzbekistan is to Tashkent as Thailand is to	bangkok	Bangkok	0.19	1	1	{'Bangkok': 0.19, 'what': 0.06, '______': 0.05, '_____': 0.03, '__': 0.03}	0	0.194336	0	1	key	key|target	0.88	TRUE	TRUE	TRUE	target	{'bangkok': 0.88}
Factual Knowledge	country_capital	Budapest is to Hungary as Taipei is to	taiwan	Taiwan	0.17	1	1	{'Taiwan': 0.17, '______': 0.07, '__': 0.06, '?': 0.06, ':': 0.05}	0	0.169922	0	1	key	key|target	0.88	TRUE	TRUE	TRUE	target	{'taiwan': 0.88}
Factual Knowledge	capital_world	Somalia is to Mogadishu as Tunisia is to	tunis	__	0.16	0	1	{'__': 0.16, 'Tunis': 0.15, '______': 0.09, '?': 0.04}	1	0.148438	0.00976562	0.99999	key	key|target	0.88	TRUE	TRUE	TRUE	target	{'tunis': 0.88}
Factual Knowledge	capital_world	Kyrgyzstan is to Bishkek as Syria is to	damascus	Damascus	0.14	1	1	{'Damascus': 0.14, '______': 0.07, '': 0.06, '__': 0.06}	0	0.142578	0	1	key	key|target	0.88	TRUE	TRUE	TRUE	target	{'damascus': 0.88}
Factual Knowledge	capital_world	Suriname is to Paramaribo as Poland is to	warsaw	Warsaw	0.13	1	1	{'Warsaw': 0.13, '______': 0.11, ':': 0.1, '?': 0.06, '__': 0.06}	0	0.134766	0	1	key	key|target	0.88	TRUE	TRUE	TRUE	target	{'warsaw': 0.88}
Factual Knowledge	capital_world	Afghanistan is to Kabul as Cuba is to	havana	Havana	0.13	1	1	{'Havana': 0.13, '______': 0.09, ':': 0.09, '__': 0.07, '_____': 0.06}	0	0.128906	0	1	key	key|target	0.88	TRUE	TRUE	TRUE	target	{'havana': 0.88}
Factual Knowledge	country_capital	Chile is to Santiago as Bulgaria is to	sofia	______	0.11	0	1	{'______': 0.11, 'Sofia': 0.11, ':': 0.05, '__': 0.05}	1	0.105957	0.00683594	0.99999	key	key|target	0.88	TRUE	TRUE	TRUE	target	{'sofia': 0.88}
Factual Knowledge	capital_world	Chile is to Santiago as Bulgaria is to	sofia	______	0.11	0	1	{'______': 0.11, 'Sofia': 0.11, ':': 0.05, '__': 0.05}	1	0.105957	0.00683594	0.99999	key	key|target	0.88	TRUE	TRUE	TRUE	target	{'sofia': 0.88}
Factual Knowledge	capital_world	Nicosia is to Cyprus as Podgorica is to	montenegro	Mont	0.71	0.5	0.5	{'Mont': 0.71, 'what': 0.06, 'which': 0.03, '__': 0.02, '?': 0.01}	0	0.714844	0	1	key	key|target	0.88	TRUE	TRUE	TRUE	target	{'montenegro': 0.88}
Factual Knowledge	name_occupation	andersen is to writer as euler is to	mathematician	mathematic	0.67	0.5	0.5	{'mathematic': 0.67, 'math': 0.05, 'mathematics': 0.05, 'scientist': 0.02, '______': 0.01}	0	0.667969	0	1	key	key|target	0.88	TRUE	TRUE	TRUE	target	{'mathematician': 0.88}
Factual Knowledge	capital_world	Venezuela is to Caracas as Zimbabwe is to	harare	Har	0.61	0.5	0.5	{'Har': 0.61, '______': 0.05, 'what': 0.03, '__': 0.03, ':': 0.02}	0	0.609375	0	1	key	key|target	0.88	TRUE	TRUE	TRUE	target	{'harare': 0.88}
Factual Knowledge	capital_world	Valletta is to Malta as Bishkek is to	kyrgyzstan	Ky	0.6	0.5	0.5	{'Ky': 0.6, 'what': 0.06, '__': 0.03, 'the': 0.03, 'which': 0.02}	0	0.597656	0	1	key	key|target	0.88	TRUE	TRUE	TRUE	target	{'kyrgyzstan': 0.88}
Factual Knowledge	capital_world	Jakarta is to Indonesia as Podgorica is to	montenegro	Mont	0.58	0.5	0.5	{'Mont': 0.58, 'what': 0.11, 'which': 0.05, '?': 0.03, '__': 0.02}	0	0.582031	0	1	key	key|target	0.88	TRUE	TRUE	TRUE	target	{'montenegro': 0.88}
Factual Knowledge	capital_world	Somalia is to Mogadishu as Latvia is to	riga	R	0.4	0.5	0.5	{'R': 0.4, 'what': 0.05, '?': 0.03, ':': 0.03}	122	0.000343323	0.402	0.998784	key	key|target	0.88	TRUE	TRUE	TRUE	target	{'riga': 0.88}
Factual Knowledge	capital_world	Belarus is to Minsk as Macedonia is to	skopje	Sk	0.39	0.5	0.5	{'Sk': 0.39, '?': 0.08, ':': 0.06, '__': 0.05, 'what': 0.05}	0	0.386719	0	1	key	key|target	0.88	TRUE	TRUE	TRUE	target	{'skopje': 0.88}
Factual Knowledge	capital_world	Somalia is to Mogadishu as Macedonia is to	skopje	Sk	0.37	0.5	0.5	{'Sk': 0.37, 'what': 0.09, 'Th': 0.07, '__': 0.06, '______': 0.04}	0	0.367188	0	1	key	key|target	0.88	TRUE	TRUE	TRUE	target	{'skopje': 0.88}
Factual Knowledge	capital_world	Tashkent is to Uzbekistan as Asmara is to	eritrea	E	0.28	0.5	0.5	{'E': 0.28, 'what': 0.2, 'which': 0.07, '__': 0.07, '?': 0.04}	31	0.00352478	0.271866	0.999691	key	key|target	0.88	TRUE	TRUE	TRUE	target	{'eritrea': 0.88}
Factual Knowledge	UK_city_county	newcastle is to northumberland as worcester is to	worcestershire	wor	0.26	0.5	0.5	{'wor': 0.26, 'merc': 0.06, 'west': 0.04, '______': 0.04, 'what': 0.04}	0	0.259766	0	1	key	key|target	0.88	TRUE	TRUE	TRUE	target	{'worcestershire': 0.88}
Factual Knowledge	capital_world	Nepal is to Kathmandu as Liberia is to	monrovia	Mon	0.23	0.5	0.5	{'Mon': 0.23, '______': 0.13, '__': 0.13, '____': 0.04, ':': 0.03}	0	0.229492	0	1	key	key|target	0.88	TRUE	TRUE	TRUE	target	{'monrovia': 0.88}
Factual Knowledge	capital_world	Guyana is to Georgetown as Zambia is to	lusaka	L	0.21	0.5	0.5	{'L': 0.21, '?': 0.06, '______': 0.05, '__': 0.05}	220	0.000120163	0.213747	0.997808	key	key|target	0.88	TRUE	TRUE	TRUE	target	{'lusaka': 0.88}
Factual Knowledge	capital_world	Tunis is to Tunisia as Asmara is to	eritrea	E	0.2	0.5	0.5	{'E': 0.2, 'what': 0.17, 'which': 0.1, '?': 0.07, '__': 0.05}	37	0.00306702	0.193222	0.999631	key	key|target	0.88	TRUE	TRUE	TRUE	target	{'eritrea': 0.88}
Factual Knowledge	capital_world	Apia is to Samoa as Banjul is to	gambia	G	0.2	0.5	0.5	{'G': 0.2, 'the': 0.18, 'The': 0.13, '?': 0.07, 'what': 0.05}	92	0.000385284	0.201763	0.999083	key	key|target	0.88	TRUE	TRUE	TRUE	target	{'gambia': 0.88}
Factual Knowledge	capital_world	Greenland is to Nuuk as Jordan is to	amman	Am	0.18	0.5	0.5	{'Am': 0.18, '__': 0.09, 'A': 0.06, '______': 0.06, '___': 0.05}	0	0.181641	0	1	key	key|target	0.88	TRUE	TRUE	TRUE	target	{'amman': 0.88}
Factual Knowledge	capital_world	Madagascar is to Antananarivo as Kazakhstan is to	astana	____	0.08	0	0.5	{'____': 0.08, 'Al': 0.07, '__': 0.07, 'Ast': 0.06, '______': 0.06}	3	0.0639648	0.0131836	0.99997	key	key|target	0.88	TRUE	TRUE	TRUE	target	{'astana': 0.88}
Factual Knowledge	UK_city_county	newcastle is to northumberland as newport is to	gwent	mon	0.2	0	0	{'mon': 0.2, 'som': 0.16, 'w': 0.06, 'glam': 0.05, 'south': 0.05}	109	0.000534058	0.195755	0.998914	key	key|target	0.88	TRUE	TRUE	TRUE	target	{'gwent': 0.88}
Factual Knowledge	capital_world	Ghana is to Accra as Eritrea is to	asmara	?	0.11	0	0	{'?': 0.07, '': 0.06, '"': 0.04, 'what': 0.04}	11	0.0216064	0.0882568	0.99989	key	key|target	0.88	TRUE	TRUE	TRUE	target	{'asmara': 0.88}
Factual Knowledge	country_capital	Afghanistan is to Kabul as Philippines is to	manila	______	0.09	0	0	{'______': 0.09, '': 0.06, '?': 0.07, '__': 0.05}	8	0.0444336	0.0498047	0.99992	key	key|target	0.88	TRUE	TRUE	TRUE	target	{'manila': 0.88}
Factual Knowledge	capital_world	Afghanistan is to Kabul as Philippines is to	manila	______	0.09	0	0	{'______': 0.09, '': 0.06, '?': 0.07, '__': 0.05}	8	0.0444336	0.0498047	0.99992	key	key|target	0.88	TRUE	TRUE	TRUE	target	{'manila': 0.88}
Factual Knowledge	capital_world	Apia is to Samoa as Havana is to	cuba	Cuba	0.99	1	1	{'Cuba': 0.99, 'the': 0.0, '': 0.0, 'Cub': 0.0}	0	0.988281	0	1	key	key|target	0.87	TRUE	TRUE	TRUE	target	{'cuba': 0.87}
Factual Knowledge	country_capital	Beirut is to Lebanon as Oslo is to	norway	Norway	0.95	1	1	{'Norway': 0.95, 'Scandin': 0.01, 'Oslo': 0.0, '': 0.0, 'Sweden': 0.0}	0	0.945312	0	1	key	key|target	0.87	TRUE	TRUE	TRUE	target	{'norway': 0.87}
Factual Knowledge	country_capital	Beirut is to Lebanon as Ottawa is to	canada	Canada	0.9	1	1	{'Canada': 0.9, '__': 0.02, '______': 0.01, '_____': 0.0, 'what': 0.0}	0	0.902344	0	1	key	key|target	0.87	TRUE	TRUE	TRUE	target	{'canada': 0.87}
Factual Knowledge	country_capital	Beirut is to Lebanon as Kabul is to	afghanistan	Afghanistan	0.9	1	1	{'Afghanistan': 0.9, '': 0.01, 'what': 0.01, 'A': 0.01, '__': 0.01}	0	0.902344	0	1	key	key|target	0.87	TRUE	TRUE	TRUE	target	{'afghanistan': 0.87}
Factual Knowledge	capital_world	Beirut is to Lebanon as Kabul is to	afghanistan	Afghanistan	0.9	1	1	{'Afghanistan': 0.9, '': 0.01, 'what': 0.01, 'A': 0.01, '__': 0.01}	0	0.902344	0	1	key	key|target	0.87	TRUE	TRUE	TRUE	target	{'afghanistan': 0.87}
Factual Knowledge	country_language	Moldova is to Moldovan as Taiwan is to	chinese	Chinese	0.88	1	1	{'Chinese': 0.88, 'Taiwanese': 0.04, 'Mandarin': 0.03, 'China': 0.01, '': 0.01}	0	0.882812	0	1	key	key|target	0.87	TRUE	TRUE	TRUE	target	{'chinese': 0.87}
Factual Knowledge	capital_world	Antananarivo is to Madagascar as Damascus is to	syria	Syria	0.88	1	1	{'Syria': 0.88, 'the': 0.02, '__': 0.01, '______': 0.01, 'what': 0.01}	0	0.875	0	1	key	key|target	0.87	TRUE	TRUE	TRUE	target	{'syria': 0.87}
Factual Knowledge	capital_world	Monrovia is to Liberia as Tehran is to	iran	Iran	0.85	1	1	{'Iran': 0.85, 'what': 0.02, '__': 0.01, '______': 0.01, '': 0.01}	0	0.847656	0	1	key	key|target	0.87	TRUE	TRUE	TRUE	target	{'iran': 0.87}
Factual Knowledge	country_capital	Jakarta is to Indonesia as Sofia is to	bulgaria	Bulgaria	0.83	1	1	{'Bulgaria': 0.83, 'what': 0.03, 'which': 0.02, '______': 0.01, '__': 0.01}	0	0.828125	0	1	key	key|target	0.87	TRUE	TRUE	TRUE	target	{'bulgaria': 0.87}
Factual Knowledge	capital_world	Ljubljana is to Slovenia as Madrid is to	spain	Spain	0.79	1	1	{'Spain': 0.79, '______': 0.03, 'what': 0.02, '__': 0.02, '_____': 0.01}	0	0.792969	0	1	key	key|target	0.87	TRUE	TRUE	TRUE	target	{'spain': 0.87}
Factual Knowledge	country_capital	Kiev is to Ukraine as Manila is to	philippines	the	0.77	0	1	{'the': 0.77, 'Philippines': 0.07, '______': 0.04, '__': 0.02, 'The': 0.02}	1	0.0673828	0.702148	0.99999	key	key|target	0.87	TRUE	TRUE	TRUE	target	{'philippines': 0.87}
Factual Knowledge	capital_world	Kiev is to Ukraine as Manila is to	philippines	the	0.77	0	1	{'the': 0.77, 'Philippines': 0.07, '______': 0.04, '__': 0.02, 'The': 0.02}	1	0.0673828	0.702148	0.99999	key	key|target	0.87	TRUE	TRUE	TRUE	target	{'philippines': 0.87}
Factual Knowledge	capital_world	Tallinn is to Estonia as Tripoli is to	libya	Libya	0.77	1	1	{'Libya': 0.77, 'what': 0.02, '__': 0.02, '___': 0.01, '______': 0.01}	0	0.773438	0	1	key	key|target	0.87	TRUE	TRUE	TRUE	target	{'libya': 0.87}
Factual Knowledge	capital_world	Kampala is to Uganda as Ottawa is to	canada	Canada	0.74	1	1	{'Canada': 0.74, '______': 0.05, '__': 0.05, '____': 0.01, '_____': 0.01}	0	0.742188	0	1	key	key|target	0.87	TRUE	TRUE	TRUE	target	{'canada': 0.87}
Factual Knowledge	capital_world	Tashkent is to Uzbekistan as Athens is to	greece	Greece	0.71	1	1	{'Greece': 0.71, '__': 0.05, '______': 0.02, 'what': 0.02, 'which': 0.02}	0	0.714844	0	1	key	key|target	0.87	TRUE	TRUE	TRUE	target	{'greece': 0.87}
Factual Knowledge	capital_world	Kathmandu is to Nepal as Nassau is to	bahamas	the	0.7	0	1	{'the': 0.7, 'The': 0.19, 'Bahamas': 0.03, '__': 0.01, '______': 0.0}	2	0.0327148	0.662598	0.99998	key	key|target	0.87	TRUE	TRUE	TRUE	target	{'bahamas': 0.87}
Factual Knowledge	country_capital	Manila is to Philippines as Ottawa is to	canada	Canada	0.69	1	1	{'Canada': 0.69, '__': 0.06, '______': 0.05, '_____': 0.02, '____': 0.01}	0	0.691406	0	1	key	key|target	0.87	TRUE	TRUE	TRUE	target	{'canada': 0.87}
Factual Knowledge	name_occupation	hegel is to philosopher as pacino is to	actor	actor	0.69	1	1	{'actor': 0.69, 'the': 0.02, 'movie': 0.01, 'mob': 0.01, 'gang': 0.01}	0	0.691406	0	1	key	key|target	0.87	TRUE	TRUE	TRUE	target	{'actor': 0.87}
Factual Knowledge	capital_world	Manila is to Philippines as Ottawa is to	canada	Canada	0.69	1	1	{'Canada': 0.69, '__': 0.06, '______': 0.05, '_____': 0.02, '____': 0.01}	0	0.691406	0	1	key	key|target	0.87	TRUE	TRUE	TRUE	target	{'canada': 0.87}
Factual Knowledge	country_capital	Bucharest is to Romania as Lima is to	peru	Peru	0.68	1	1	{'Peru': 0.68, '______': 0.05, '__': 0.04, 'what': 0.03, '_____': 0.02}	0	0.683594	0	1	key	key|target	0.87	TRUE	TRUE	TRUE	target	{'peru': 0.87}
Factual Knowledge	capital_world	Rabat is to Morocco as Tegucigalpa is to	honduras	Honduras	0.68	1	1	{'Honduras': 0.68, 'what': 0.1, '______': 0.02, 'which': 0.02, '__': 0.02}	0	0.683594	0	1	key	key|target	0.87	TRUE	TRUE	TRUE	target	{'honduras': 0.87}
Factual Knowledge	capital_world	Bucharest is to Romania as Lima is to	peru	Peru	0.68	1	1	{'Peru': 0.68, '______': 0.05, '__': 0.04, 'what': 0.03, '_____': 0.02}	0	0.683594	0	1	key	key|target	0.87	TRUE	TRUE	TRUE	target	{'peru': 0.87}
Factual Knowledge	capital_world	Roseau is to Dominica as Taipei is to	taiwan	Taiwan	0.61	1	1	{'Taiwan': 0.61, 'China': 0.24, 'the': 0.07, 'Form': 0.02, 'Republic': 0.01}	0	0.613281	0	1	key	key|target	0.87	TRUE	TRUE	TRUE	target	{'taiwan': 0.87}
Factual Knowledge	capital_world	Zagreb is to Croatia as Bratislava is to	slovakia	Slovakia	0.59	1	1	{'Slovakia': 0.59, 'what': 0.1, 'which': 0.08, '______': 0.02, '__': 0.02}	0	0.59375	0	1	key	key|target	0.87	TRUE	TRUE	TRUE	target	{'slovakia': 0.87}
Factual Knowledge	capital_world	Venezuela is to Caracas as Denmark is to	copenhagen	Copenhagen	0.58	1	1	{'Copenhagen': 0.58, ':': 0.02, '______': 0.02}	0	0.578125	0	1	key	key|target	0.87	TRUE	TRUE	TRUE	target	{'copenhagen': 0.87}
Factual Knowledge	capital_world	Mogadishu is to Somalia as Tehran is to	iran	Iran	0.52	1	1	{'Iran': 0.52, '______': 0.07, '__': 0.06, 'what': 0.04, '____': 0.04}	0	0.515625	0	1	key	key|target	0.87	TRUE	TRUE	TRUE	target	{'iran': 0.87}
Factual Knowledge	capital_world	Santiago is to Chile as Amman is to	jordan	Jordan	0.5	1	1	{'Jordan': 0.5, 'what': 0.14, '___': 0.04, '__': 0.04, '______': 0.03}	0	0.503906	0	1	key	key|target	0.87	TRUE	TRUE	TRUE	target	{'jordan': 0.87}
Factual Knowledge	capital_world	Kiev is to Ukraine as Nicosia is to	cyprus	Cyprus	0.49	1	1	{'Cyprus': 0.49, 'which': 0.09, 'what': 0.07, '__': 0.06, '______': 0.04}	0	0.488281	0	1	key	key|target	0.87	TRUE	TRUE	TRUE	target	{'cyprus': 0.87}
Factual Knowledge	capital_world	Managua is to Nicaragua as Sofia is to	bulgaria	Bulgaria	0.47	1	1	{'Bulgaria': 0.47, 'what': 0.15, 'which': 0.07, '______': 0.04, ':': 0.04}	0	0.474609	0	1	key	key|target	0.87	TRUE	TRUE	TRUE	target	{'bulgaria': 0.87}
Factual Knowledge	name_occupation	mencius is to philosopher as wagner is to	composer	composer	0.44	1	1	{'composer': 0.44, 'musician': 0.08, 'opera': 0.04, '?': 0.03, 'what': 0.03}	0	0.4375	0	1	key	key|target	0.87	TRUE	TRUE	TRUE	target	{'composer': 0.87}
Factual Knowledge	capital_world	Quito is to Ecuador as Tallinn is to	estonia	Estonia	0.43	1	1	{'Estonia': 0.43, 'what': 0.14, 'which': 0.06, ':': 0.03, '__': 0.03}	0	0.427734	0	1	key	key|target	0.87	TRUE	TRUE	TRUE	target	{'estonia': 0.87}
Factual Knowledge	country_capital	Chile is to Santiago as Taiwan is to	taipei	Taipei	0.41	1	1	{'Taipei': 0.41, '__': 0.1, '______': 0.09, '____': 0.05, '___': 0.04}	0	0.414062	0	1	key	key|target	0.87	TRUE	TRUE	TRUE	target	{'taipei': 0.87}
Factual Knowledge	capital_world	Chile is to Santiago as Taiwan is to	taipei	Taipei	0.41	1	1	{'Taipei': 0.41, '__': 0.1, '______': 0.09, '____': 0.05, '___': 0.04}	0	0.414062	0	1	key	key|target	0.87	TRUE	TRUE	TRUE	target	{'taipei': 0.87}
Factual Knowledge	country_capital	Manila is to Philippines as Tehran is to	iran	Iran	0.4	1	1	{'Iran': 0.4, 'what': 0.07, '______': 0.06, '__': 0.05, '____': 0.03}	0	0.398438	0	1	key	key|target	0.87	TRUE	TRUE	TRUE	target	{'iran': 0.87}
Factual Knowledge	capital_world	Manila is to Philippines as Tehran is to	iran	Iran	0.4	1	1	{'Iran': 0.4, 'what': 0.07, '______': 0.06, '__': 0.05, '____': 0.03}	0	0.398438	0	1	key	key|target	0.87	TRUE	TRUE	TRUE	target	{'iran': 0.87}
Factual Knowledge	capital_world	Kyrgyzstan is to Bishkek as Belgium is to	brussels	Brussels	0.38	1	1	{'Brussels': 0.38, '______': 0.07, '': 0.04, ':': 0.04}	0	0.382812	0	1	key	key|target	0.87	TRUE	TRUE	TRUE	target	{'brussels': 0.87}
Factual Knowledge	capital_world	Vienna is to Austria as Bucharest is to	romania	Romania	0.37	1	1	{'Romania': 0.37, 'what': 0.09, 'which': 0.06, ':': 0.05, '______': 0.04}	0	0.369141	0	1	key	key|target	0.87	TRUE	TRUE	TRUE	target	{'romania': 0.87}
Factual Knowledge	capital_world	Paris is to France as Tripoli is to	libya	Libya	0.35	1	1	{'Libya': 0.35, 'what': 0.1, '"': 0.04, 'which': 0.03, ':': 0.03}	0	0.351562	0	1	key	key|target	0.87	TRUE	TRUE	TRUE	target	{'libya': 0.87}
Factual Knowledge	capital_world	Mozambique is to Maputo as Taiwan is to	taipei	Taipei	0.35	1	1	{'Taipei': 0.35, '__': 0.11, '______': 0.08, '____': 0.04, '___': 0.03}	0	0.347656	0	1	key	key|target	0.87	TRUE	TRUE	TRUE	target	{'taipei': 0.87}
Factual Knowledge	country_capital	Kenya is to Nairobi as Italy is to	rome	Rome	0.31	1	1	{'Rome': 0.31, '__': 0.05, '______': 0.05, ':': 0.05}	0	0.314453	0	1	key	key|target	0.87	TRUE	TRUE	TRUE	target	{'rome': 0.87}
Factual Knowledge	capital_world	Tunis is to Tunisia as Abuja is to	nigeria	Nigeria	0.31	1	1	{'Nigeria': 0.31, '______': 0.12, '__': 0.09, '___': 0.04, '____': 0.04}	0	0.306641	0	1	key	key|target	0.87	TRUE	TRUE	TRUE	target	{'nigeria': 0.87}
Factual Knowledge	capital_world	Kenya is to Nairobi as Italy is to	rome	Rome	0.31	1	1	{'Rome': 0.31, '__': 0.05, '______': 0.05, ':': 0.05}	0	0.314453	0	1	key	key|target	0.87	TRUE	TRUE	TRUE	target	{'rome': 0.87}
Factual Knowledge	capital_world	Sofia is to Bulgaria as Amman is to	jordan	Jordan	0.3	1	1	{'Jordan': 0.3, 'what': 0.1, '__': 0.07, '______': 0.06, '___': 0.05}	0	0.298828	0	1	key	key|target	0.87	TRUE	TRUE	TRUE	target	{'jordan': 0.87}
Factual Knowledge	name_occupation	dante is to poet as hawking is to	physicist	physicist	0.29	1	1	{'physicist': 0.29, 'scientist': 0.17, 'ast': 0.02, 'what': 0.02, '______': 0.02}	0	0.292969	0	1	key	key|target	0.87	TRUE	TRUE	TRUE	target	{'physicist': 0.87}
Factual Knowledge	country_capital	Taiwan is to Taipei as Iran is to	tehran	Tehran	0.26	1	1	{'Tehran': 0.26, '______': 0.07, '__': 0.06, ':': 0.05, '___': 0.04}	0	0.259766	0	1	key	key|target	0.87	TRUE	TRUE	TRUE	target	{'tehran': 0.87}
Factual Knowledge	capital_world	Taiwan is to Taipei as Iran is to	tehran	Tehran	0.26	1	1	{'Tehran': 0.26, '______': 0.07, '__': 0.06, ':': 0.05, '___': 0.04}	0	0.259766	0	1	key	key|target	0.87	TRUE	TRUE	TRUE	target	{'tehran': 0.87}
Factual Knowledge	capital_world	Senegal is to Dakar as Cuba is to	havana	Havana	0.26	1	1	{'Havana': 0.26, ':': 0.05, '______': 0.05}	0	0.263672	0	1	key	key|target	0.87	TRUE	TRUE	TRUE	target	{'havana': 0.87}
Factual Knowledge	name_occupation	mencius is to philosopher as stalin is to	dictator	politician	0.25	0	1	{'politician': 0.25, 'dictator': 0.09, 'communist': 0.06, 'leader': 0.04, 'states': 0.03}	1	0.0922852	0.157715	0.99999	key	key|target	0.87	TRUE	TRUE	TRUE	target	{'dictator': 0.87}
Factual Knowledge	capital_world	Budapest is to Hungary as Kigali is to	rwanda	Rwanda	0.24	1	1	{'Rwanda': 0.24, '______': 0.09, '__': 0.07, 'what': 0.06, 'which': 0.04}	0	0.236328	0	1	key	key|target	0.87	TRUE	TRUE	TRUE	target	{'rwanda': 0.87}
Factual Knowledge	name_occupation	descartes is to mathematician as wittgenstein is to	philosopher	philosopher	0.23	1	1	{'philosopher': 0.23, 'lingu': 0.07, '?': 0.06, '___': 0.04, 'what': 0.04}	0	0.228516	0	1	key	key|target	0.87	TRUE	TRUE	TRUE	target	{'philosopher': 0.87}
Factual Knowledge	capital_world	Madrid is to Spain as Muscat is to	oman	Oman	0.23	1	1	{'Oman': 0.23, '_____': 0.08, '____': 0.08, '___': 0.07, '__': 0.07}	0	0.233398	0	1	key	key|target	0.87	TRUE	TRUE	TRUE	target	{'oman': 0.87}
Factual Knowledge	capital_world	Bangkok is to Thailand as Khartoum is to	sudan	Sudan	0.23	1	1	{'Sudan': 0.23, 'what': 0.17, '______': 0.08, '__': 0.08, '____': 0.04}	0	0.229492	0	1	key	key|target	0.87	TRUE	TRUE	TRUE	target	{'sudan': 0.87}
Factual Knowledge	country_capital	Ireland is to Dublin as Philippines is to	manila	______	0.21	0	1	{'______': 0.21, 'Manila': 0.11, '__': 0.09, '____': 0.08, '_____': 0.07}	1	0.107422	0.106445	0.99999	key	key|target	0.87	TRUE	TRUE	TRUE	target	{'manila': 0.87}
Factual Knowledge	capital_world	Ireland is to Dublin as Philippines is to	manila	______	0.21	0	1	{'______': 0.21, 'Manila': 0.11, '__': 0.09, '____': 0.08, '_____': 0.07}	1	0.107422	0.106445	0.99999	key	key|target	0.87	TRUE	TRUE	TRUE	target	{'manila': 0.87}
Factual Knowledge	name_nationality	hegel is to German as spinoza is to	dutch	Jewish	0.2	0	1	{'Jewish': 0.2, 'Dutch': 0.18, 'French': 0.05, 'English': 0.04, 'the': 0.04}	1	0.18457	0.0117188	0.99999	key	key|target	0.87	TRUE	TRUE	TRUE	target	{'dutch': 0.87}
Factual Knowledge	name_occupation	descartes is to mathematician as hitler is to	dictator	politician	0.18	0	1	{'politician': 0.18, 'jew': 0.13, 'dictator': 0.04, 'states': 0.03, 'german': 0.02}	2	0.0419922	0.134766	0.99998	key	key|target	0.87	TRUE	TRUE	TRUE	target	{'dictator': 0.87}
Factual Knowledge	country_capital	Pakistan is to Islamabad as Norway is to	oslo	Oslo	0.17	1	1	{'Oslo': 0.17, '______': 0.09, '?': 0.07, '__': 0.06, ':': 0.06}	0	0.170898	0	1	key	key|target	0.87	TRUE	TRUE	TRUE	target	{'oslo': 0.87}
Factual Knowledge	capital_world	Niamey is to Niger as Tehran is to	iran	Iran	0.17	1	1	{'Iran': 0.17, 'what': 0.11, ':': 0.1, '___': 0.04, '': 0.04}	0	0.166016	0	1	key	key|target	0.87	TRUE	TRUE	TRUE	target	{'iran': 0.87}
Factual Knowledge	capital_world	Cyprus is to Nicosia as Iran is to	tehran	?	0.17	0	1	{'?': 0.04, 'Tehran': 0.14, 'what': 0.08, '': 0.05}	1	0.141602	0.0292969	0.99999	key	key|target	0.87	TRUE	TRUE	TRUE	target	{'tehran': 0.87}
Factual Knowledge	capital_world	Dominica is to Roseau as Iran is to	tehran	Tehran	0.17	1	1	{'Tehran': 0.17, ':': 0.09, '?': 0.06, '': 0.06, '__': 0.05}	0	0.171875	0	1	key	key|target	0.87	TRUE	TRUE	TRUE	target	{'tehran': 0.87}
Factual Knowledge	capital_world	Pakistan is to Islamabad as Norway is to	oslo	Oslo	0.17	1	1	{'Oslo': 0.17, '______': 0.09, '?': 0.07, '__': 0.06, ':': 0.06}	0	0.170898	0	1	key	key|target	0.87	TRUE	TRUE	TRUE	target	{'oslo': 0.87}
Factual Knowledge	capital_world	Azerbaijan is to Baku as Hungary is to	budapest	Budapest	0.15	1	1	{'Budapest': 0.15, '______': 0.11, '__': 0.08, '': 0.07, ':': 0.06}	0	0.150391	0	1	key	key|target	0.87	TRUE	TRUE	TRUE	target	{'budapest': 0.87}
Factual Knowledge	capital_world	Venezuela is to Caracas as Portugal is to	lisbon	:	0.15	0	1	{':': 0.08, 'Lisbon': 0.08, '______': 0.06, '__': 0.06}	1	0.0834961	0.0629883	0.99999	key	key|target	0.87	TRUE	TRUE	TRUE	target	{'lisbon': 0.87}
Factual Knowledge	capital_world	Ghana is to Accra as China is to	beijing	Beijing	0.14	1	1	{'Beijing': 0.14, '______': 0.09, '____': 0.04, '?': 0.03, ':': 0.03}	0	0.137695	0	1	key	key|target	0.87	TRUE	TRUE	TRUE	target	{'beijing': 0.87}
Factual Knowledge	capital_world	Burundi is to Bujumbura as Spain is to	madrid	Madrid	0.12	1	1	{'Madrid': 0.12, 'what': 0.1, '______': 0.1, 'Barcelona': 0.06, '?': 0.05}	0	0.116211	0	1	key	key|target	0.87	TRUE	TRUE	TRUE	target	{'madrid': 0.87}
Factual Knowledge	capital_world	Niger is to Niamey as Norway is to	oslo	______	0.07	0	1	{'______': 0.07, 'Oslo': 0.06, '?': 0.05, 'what': 0.05}	2	0.0566406	0.0161133	0.99998	key	key|target	0.87	TRUE	TRUE	TRUE	target	{'oslo': 0.87}
Factual Knowledge	capital_world	Apia is to Samoa as Georgetown is to	guyana	Guy	0.79	0.5	0.5	{'Guy': 0.79, 'the': 0.05, 'St': 0.02, 'Belize': 0.01, 'Gu': 0.01}	0	0.792969	0	1	key	key|target	0.87	TRUE	TRUE	TRUE	target	{'guyana': 0.87}
Factual Knowledge	capital_world	Apia is to Samoa as Asmara is to	eritrea	E	0.6	0.5	0.5	{'E': 0.6, 'what': 0.1, 'which': 0.04, '__': 0.03, '?': 0.03}	29	0.0019989	0.595657	0.999711	key	key|target	0.87	TRUE	TRUE	TRUE	target	{'eritrea': 0.87}
Factual Knowledge	capital_world	Belgium is to Brussels as Tajikistan is to	dushanbe	D	0.46	0.5	0.5	{'D': 0.46, ':': 0.02, '__': 0.03, '...': 0.02}	1004	1.30534e-05	0.458971	0.989995	key	key|target	0.87	TRUE	TRUE	TRUE	target	{'dushanbe': 0.87}
Factual Knowledge	capital_world	Kathmandu is to Nepal as Maputo is to	mozambique	Moz	0.42	0.5	0.5	{'Moz': 0.42, 'what': 0.1, '__': 0.05, 'which': 0.05, '______': 0.05}	0	0.419922	0	1	key	key|target	0.87	TRUE	TRUE	TRUE	target	{'mozambique': 0.87}
Factual Knowledge	capital_world	France is to Paris as Estonia is to	tallinn	Tall	0.4	0.5	0.5	{'Tall': 0.4, '______': 0.05, 'what': 0.05, '...': 0.03, '__': 0.02}	0	0.402344	0	1	key	key|target	0.87	TRUE	TRUE	TRUE	target	{'tallinn': 0.87}
Factual Knowledge	capital_world	Antananarivo is to Madagascar as Dushanbe is to	tajikistan	Taj	0.39	0.5	0.5	{'Taj': 0.39, 'what': 0.1, 'which': 0.06, '?': 0.05, 'Turk': 0.03}	0	0.388672	0	1	key	key|target	0.87	TRUE	TRUE	TRUE	target	{'tajikistan': 0.87}
Factual Knowledge	capital_world	Ukraine is to Kiev as Montenegro is to	podgorica	Pod	0.35	0.5	0.5	{'Pod': 0.35, '__': 0.06, 'what': 0.04, '?': 0.03, ':': 0.03}	0	0.353516	0	1	key	key|target	0.87	TRUE	TRUE	TRUE	target	{'podgorica': 0.87}
Factual Knowledge	capital_world	Uzbekistan is to Tashkent as Gambia is to	banjul	Ban	0.32	0.5	0.5	{'Ban': 0.32, '?': 0.04, '"': 0.03, ':': 0.03, 'what': 0.03}	0	0.324219	0	1	key	key|target	0.87	TRUE	TRUE	TRUE	target	{'banjul': 0.87}
Factual Knowledge	capital_world	Mozambique is to Maputo as Belarus is to	minsk	M	0.31	0.5	0.5	{'M': 0.31, '______': 0.05, ':': 0.04, '__': 0.03, '': 0.03}	121	0.000545502	0.310001	0.998794	key	key|target	0.87	TRUE	TRUE	TRUE	target	{'minsk': 0.87}
Factual Knowledge	capital_world	Somalia is to Mogadishu as Honduras is to	tegucigalpa	T	0.29	0.5	0.5	{'T': 0.29, '______': 0.12, '__': 0.08, '?': 0.05, ':': 0.04}	62	0.000801086	0.284355	0.999382	key	key|target	0.87	TRUE	TRUE	TRUE	target	{'tegucigalpa': 0.87}
Factual Knowledge	capital_world	Liberia is to Monrovia as Mauritania is to	nouakchott	__	0.2	0	0.5	{'__': 0.2, 'Nou': 0.08, '______': 0.07, '"': 0.06, ':': 0.03}	1	0.0834961	0.116699	0.99999	key	key|target	0.87	TRUE	TRUE	TRUE	target	{'nouakchott': 0.87}
Factual Knowledge	capital_world	Honduras is to Tegucigalpa as Croatia is to	zagreb	what	0.19	0	0.5	{'what': 0.19, 'Zag': 0.16, '______': 0.05, '__': 0.04, '_': 0.04}	1	0.163086	0.0283203	0.99999	key	key|target	0.87	TRUE	TRUE	TRUE	target	{'zagreb': 0.87}
Factual Knowledge	capital_world	Chile is to Santiago as Honduras is to	tegucigalpa	T	0.19	0.5	0.5	{'T': 0.19, '______': 0.12, ':': 0.07, '__': 0.06, '?': 0.03}	52	0.0014801	0.191879	0.999482	key	key|target	0.87	TRUE	TRUE	TRUE	target	{'tegucigalpa': 0.87}
Factual Knowledge	capital_world	Algiers is to Algeria as Funafuti is to	tuvalu	Tu	0.16	0.5	0.5	{'Tu': 0.16, '?': 0.1, '_____': 0.07, 'what': 0.07, '____': 0.06}	0	0.155273	0	1	key	key|target	0.87	TRUE	TRUE	TRUE	target	{'tuvalu': 0.87}
Factual Knowledge	capital_world	Latvia is to Riga as Eritrea is to	asmara	?	0.14	0	0.5	{'?': 0.04, 'As': 0.1, '__': 0.06, 'what': 0.05}	1	0.101074	0.0375977	0.99999	key	key|target	0.87	TRUE	TRUE	TRUE	target	{'asmara': 0.87}
Factual Knowledge	capital_world	Kyrgyzstan is to Bishkek as Sudan is to	khartoum	Kh	0.13	0.5	0.5	{'Kh': 0.13, '': 0.06, '?': 0.06, 'what': 0.06}	0	0.126953	0	1	key	key|target	0.87	TRUE	TRUE	TRUE	target	{'khartoum': 0.87}
Factual Knowledge	capital_world	Bangkok is to Thailand as Funafuti is to	tuvalu	what	0.12	0	0.5	{'what': 0.12, '?': 0.08, 'Tu': 0.08, '_____': 0.06, '__': 0.05}	2	0.0771484	0.0390625	0.99998	key	key|target	0.87	TRUE	TRUE	TRUE	target	{'tuvalu': 0.87}
Factual Knowledge	capital_world	Bhutan is to Thimphu as Eritrea is to	asmara	?	0.12	0	0.5	{'?': 0.07, 'what': 0.07, '__': 0.05, 'As': 0.05}	4	0.0507812	0.0708008	0.99996	key	key|target	0.87	TRUE	TRUE	TRUE	target	{'asmara': 0.87}
Factual Knowledge	capital_world	Greenland is to Nuuk as Liechtenstein is to	vaduz	Vad	0.12	0.5	0.5	{'Vad': 0.12, '__': 0.08, 'what': 0.06, '______': 0.06, '___': 0.05}	0	0.118164	0	1	key	key|target	0.87	TRUE	TRUE	TRUE	target	{'vaduz': 0.87}
Factual Knowledge	capital_world	Bulgaria is to Sofia as Liechtenstein is to	vaduz	Vad	0.11	0.5	0.5	{'Vad': 0.11, '__': 0.08, '______': 0.08, '?': 0.05, '_': 0.05}	0	0.11084	0	1	key	key|target	0.87	TRUE	TRUE	TRUE	target	{'vaduz': 0.87}
Factual Knowledge	capital_world	France is to Paris as Liechtenstein is to	vaduz	__	0.1	0	0.5	{'__': 0.1, '______': 0.09, 'Vad': 0.06, 'what': 0.06, '...': 0.05}	3	0.0612793	0.0397949	0.99997	key	key|target	0.87	TRUE	TRUE	TRUE	target	{'vaduz': 0.87}
Factual Knowledge	capital_world	Copenhagen is to Denmark as Georgetown is to	guyana	Washington	0.3	0	0	{'Washington': 0.3, 'the': 0.21, 'D': 0.07, 'DC': 0.03, 'what': 0.03}	6	0.0227051	0.281982	0.99994	key	key|target	0.87	TRUE	TRUE	TRUE	target	{'guyana': 0.87}
Factual Knowledge	UK_city_county	cambridge is to cambridgeshire as newport is to	gwent	new	0.24	0	0	{'new': 0.24, '?': 0.06, 'w': 0.06, 'what': 0.04, 'mon': 0.03}	344	6.91414e-05	0.242118	0.996572	key	key|target	0.87	TRUE	TRUE	TRUE	target	{'gwent': 0.87}
Factual Knowledge	name_nationality	lenin is to Soviet as maxwell is to	scottish	English	0.19	0	0	{'English': 0.19, 'British': 0.18, 'American': 0.16, 'american': 0.04, 'english': 0.04}	11	0.00842285	0.18396	0.99989	key	key|target	0.87	TRUE	TRUE	TRUE	target	{'scottish': 0.87}
Factual Knowledge	name_occupation	columbus is to explorer as michelangelo is to	sculptor	artist	0.18	0	0	{'artist': 0.18, '': 0.05, 'what': 0.04, ':': 0.03}	13	0.0186768	0.158081	0.99987	key	key|target	0.87	TRUE	TRUE	TRUE	target	{'sculptor': 0.87}
Factual Knowledge	capital_world	Indonesia is to Jakarta as Sudan is to	khartoum	?	0.09	0	0	{'?': 0.09, '__': 0.08, 'what': 0.07, '______': 0.07, '____': 0.07}	6	0.0441895	0.0437012	0.99994	key	key|target	0.87	TRUE	TRUE	TRUE	target	{'khartoum': 0.87}
Factual Knowledge	capital_world	Vientiane is to Laos as Canberra is to	australia	Australia	0.98	1	1	{'Australia': 0.98, 'the': 0.0, '__': 0.0, 'which': 0.0, 'A': 0.0}	0	0.976562	0	1	key	key|target	0.86	TRUE	TRUE	TRUE	target	{'australia': 0.86}
Factual Knowledge	capital_world	Apia is to Samoa as Cairo is to	egypt	Egypt	0.98	1	1	{'Egypt': 0.98, 'the': 0.0, 'Eq': 0.0, 'Ey': 0.0, '': 0.0}	0	0.976562	0	1	key	key|target	0.86	TRUE	TRUE	TRUE	target	{'egypt': 0.86}
Factual Knowledge	country_capital	Bangkok is to Thailand as Canberra is to	australia	Australia	0.94	1	1	{'Australia': 0.94, '______': 0.01, 'what': 0.0, '__': 0.0, 'which': 0.0}	0	0.9375	0	1	key	key|target	0.86	TRUE	TRUE	TRUE	target	{'australia': 0.86}
Factual Knowledge	capital_world	Bangkok is to Thailand as Canberra is to	australia	Australia	0.94	1	1	{'Australia': 0.94, '______': 0.01, 'what': 0.0, '__': 0.0, 'which': 0.0}	0	0.9375	0	1	key	key|target	0.86	TRUE	TRUE	TRUE	target	{'australia': 0.86}
Factual Knowledge	capital_world	Suva is to Fiji as Abuja is to	nigeria	Nigeria	0.93	1	1	{'Nigeria': 0.93, '______': 0.01, '__': 0.01, '': 0.0}	0	0.933594	0	1	key	key|target	0.86	TRUE	TRUE	TRUE	target	{'nigeria': 0.86}
Factual Knowledge	country_capital	Kiev is to Ukraine as Stockholm is to	sweden	Sweden	0.91	1	1	{'Sweden': 0.91, 'Scandin': 0.01, 'what': 0.01, 'Finland': 0.01, '______': 0.0}	0	0.914062	0	1	key	key|target	0.86	TRUE	TRUE	TRUE	target	{'sweden': 0.86}
Factual Knowledge	country_capital	Brussels is to Belgium as Kingston is to	jamaica	Jamaica	0.87	1	1	{'Jamaica': 0.87, 'Canada': 0.02, 'England': 0.01, '__': 0.01, '______': 0.01}	0	0.867188	0	1	key	key|target	0.86	TRUE	TRUE	TRUE	target	{'jamaica': 0.86}
Factual Knowledge	capital_world	Brussels is to Belgium as Kingston is to	jamaica	Jamaica	0.87	1	1	{'Jamaica': 0.87, 'Canada': 0.02, 'England': 0.01, '__': 0.01, '______': 0.01}	0	0.867188	0	1	key	key|target	0.86	TRUE	TRUE	TRUE	target	{'jamaica': 0.86}
Factual Knowledge	capital_world	Kabul is to Afghanistan as Havana is to	cuba	Cuba	0.85	1	1	{'Cuba': 0.85, '______': 0.02, 'what': 0.01, '__': 0.01, 'which': 0.01}	0	0.851562	0	1	key	key|target	0.86	TRUE	TRUE	TRUE	target	{'cuba': 0.86}
Factual Knowledge	capital_world	Ljubljana is to Slovenia as Stockholm is to	sweden	Sweden	0.84	1	1	{'Sweden': 0.84, 'what': 0.02, 'Scandin': 0.01, 'which': 0.01, '______': 0.01}	0	0.84375	0	1	key	key|target	0.86	TRUE	TRUE	TRUE	target	{'sweden': 0.86}
Factual Knowledge	capital_world	Caracas is to Venezuela as Jakarta is to	indonesia	Indonesia	0.83	1	1	{'Indonesia': 0.83, 'what': 0.03, ':': 0.02, '______': 0.01, 'Java': 0.01}	0	0.828125	0	1	key	key|target	0.86	TRUE	TRUE	TRUE	target	{'indonesia': 0.86}
Factual Knowledge	country_capital	Beirut is to Lebanon as Hanoi is to	vietnam	Vietnam	0.78	1	1	{'Vietnam': 0.78, 'Viet': 0.04, 'North': 0.04, '______': 0.02, '': 0.02}	0	0.78125	0	1	key	key|target	0.86	TRUE	TRUE	TRUE	target	{'vietnam': 0.86}
Factual Knowledge	capital_world	Beirut is to Lebanon as Hanoi is to	vietnam	Vietnam	0.78	1	1	{'Vietnam': 0.78, 'Viet': 0.04, 'North': 0.04, '______': 0.02, '': 0.02}	0	0.78125	0	1	key	key|target	0.86	TRUE	TRUE	TRUE	target	{'vietnam': 0.86}
Factual Knowledge	capital_world	Ljubljana is to Slovenia as Manila is to	philippines	the	0.74	0	1	{'the': 0.74, 'Philippines': 0.07, '______': 0.03, 'The': 0.02, '__': 0.02}	1	0.0708008	0.66748	0.99999	key	key|target	0.86	TRUE	TRUE	TRUE	target	{'philippines': 0.86}
Factual Knowledge	capital_world	Thimphu is to Bhutan as Bratislava is to	slovakia	Slovakia	0.71	1	1	{'Slovakia': 0.71, 'what': 0.06, 'which': 0.04, '______': 0.03, '__': 0.02}	0	0.710938	0	1	key	key|target	0.86	TRUE	TRUE	TRUE	target	{'slovakia': 0.86}
Factual Knowledge	name_occupation	hume is to philosopher as jolie is to	actress	actress	0.7	1	1	{'actress': 0.7, 'actor': 0.03, 'model': 0.01, 'movie': 0.01, 'what': 0.01}	0	0.703125	0	1	key	key|target	0.86	TRUE	TRUE	TRUE	target	{'actress': 0.86}
Factual Knowledge	country_capital	Copenhagen is to Denmark as Tehran is to	iran	Iran	0.68	1	1	{'Iran': 0.68, 'what': 0.03, '______': 0.02, '__': 0.02, 'Pers': 0.01}	0	0.675781	0	1	key	key|target	0.86	TRUE	TRUE	TRUE	target	{'iran': 0.86}
Factual Knowledge	country_capital	Lebanon is to Beirut as England is to	london	London	0.68	1	1	{'London': 0.68, '______': 0.06, '__': 0.03, 'Manchester': 0.01, 'the': 0.01}	0	0.683594	0	1	key	key|target	0.86	TRUE	TRUE	TRUE	target	{'london': 0.86}
Factual Knowledge	capital_world	Ottawa is to Canada as Bern is to	switzerland	Switzerland	0.63	1	1	{'Switzerland': 0.63, '______': 0.05, 'what': 0.03, '_____': 0.03, 'which': 0.03}	0	0.628906	0	1	key	key|target	0.86	TRUE	TRUE	TRUE	target	{'switzerland': 0.86}
Factual Knowledge	capital_world	Dakar is to Senegal as London is to	england	England	0.63	1	1	{'England': 0.63, 'the': 0.1, 'Great': 0.06, '______': 0.03, ':': 0.02}	0	0.632812	0	1	key	key|target	0.86	TRUE	TRUE	TRUE	target	{'england': 0.86}
Factual Knowledge	country_capital	Iraq is to Baghdad as Belgium is to	brussels	Brussels	0.62	1	1	{'Brussels': 0.62, '______': 0.07, 'what': 0.02, '_____': 0.02, '____': 0.02}	0	0.621094	0	1	key	key|target	0.86	TRUE	TRUE	TRUE	target	{'brussels': 0.86}
Factual Knowledge	capital_world	Tirana is to Albania as Tripoli is to	libya	Libya	0.62	1	1	{'Libya': 0.62, 'what': 0.03, '___': 0.03, '______': 0.02, '__': 0.02}	0	0.625	0	1	key	key|target	0.86	TRUE	TRUE	TRUE	target	{'libya': 0.86}
Factual Knowledge	capital_world	Iraq is to Baghdad as Belgium is to	brussels	Brussels	0.62	1	1	{'Brussels': 0.62, '______': 0.07, 'what': 0.02, '_____': 0.02, '____': 0.02}	0	0.621094	0	1	key	key|target	0.86	TRUE	TRUE	TRUE	target	{'brussels': 0.86}
Factual Knowledge	country_capital	Beirut is to Lebanon as London is to	england	England	0.6	1	1	{'England': 0.6, 'Britain': 0.16, 'the': 0.12, 'Great': 0.06, '______': 0.01}	0	0.601562	0	1	key	key|target	0.86	TRUE	TRUE	TRUE	target	{'england': 0.86}
Factual Knowledge	capital_world	Taipei is to Taiwan as Tirana is to	albania	Albania	0.6	1	1	{'Albania': 0.6, 'what': 0.06, '__': 0.05, '______': 0.04, 'which': 0.02}	0	0.601562	0	1	key	key|target	0.86	TRUE	TRUE	TRUE	target	{'albania': 0.86}
Factual Knowledge	capital_world	Ottawa is to Canada as Tripoli is to	libya	Libya	0.57	1	1	{'Libya': 0.57, 'what': 0.06, '___': 0.05, '____': 0.02, ':': 0.02}	0	0.570312	0	1	key	key|target	0.86	TRUE	TRUE	TRUE	target	{'libya': 0.86}
Factual Knowledge	name_nationality	leibniz is to German as newton is to	english	English	0.55	1	1	{'English': 0.55, 'english': 0.11, 'British': 0.07, 'England': 0.02, 'british': 0.02}	0	0.550781	0	1	key	key|target	0.86	TRUE	TRUE	TRUE	target	{'english': 0.86}
Factual Knowledge	capital_world	Minsk is to Belarus as Rabat is to	morocco	Morocco	0.54	1	1	{'Morocco': 0.54, 'what': 0.05, '__': 0.03, ':': 0.03, 'which': 0.02}	0	0.539062	0	1	key	key|target	0.86	TRUE	TRUE	TRUE	target	{'morocco': 0.86}
Factual Knowledge	country_capital	Chile is to Santiago as Japan is to	tokyo	Tokyo	0.52	1	1	{'Tokyo': 0.52, '______': 0.04, 'A': 0.04, '__': 0.03, '': 0.03}	0	0.523438	0	1	key	key|target	0.86	TRUE	TRUE	TRUE	target	{'tokyo': 0.86}
Factual Knowledge	capital_world	Nairobi is to Kenya as Riga is to	latvia	Latvia	0.52	1	1	{'Latvia': 0.52, 'which': 0.05, 'what': 0.04, ':': 0.04, '______': 0.03}	0	0.519531	0	1	key	key|target	0.86	TRUE	TRUE	TRUE	target	{'latvia': 0.86}
Factual Knowledge	capital_world	Chile is to Santiago as Japan is to	tokyo	Tokyo	0.52	1	1	{'Tokyo': 0.52, '______': 0.04, 'A': 0.04, '__': 0.03, '': 0.03}	0	0.523438	0	1	key	key|target	0.86	TRUE	TRUE	TRUE	target	{'tokyo': 0.86}
Factual Knowledge	country_language	Jamaica is to English as Taiwan is to	chinese	Chinese	0.49	1	1	{'Chinese': 0.49, 'Mandarin': 0.13, '______': 0.07, 'China': 0.03, '__': 0.02}	0	0.492188	0	1	key	key|target	0.86	TRUE	TRUE	TRUE	target	{'chinese': 0.86}
Factual Knowledge	capital_world	Managua is to Nicaragua as Tallinn is to	estonia	Estonia	0.47	1	1	{'Estonia': 0.47, 'what': 0.13, 'which': 0.07, '__': 0.04, '______': 0.04}	0	0.474609	0	1	key	key|target	0.86	TRUE	TRUE	TRUE	target	{'estonia': 0.86}
Factual Knowledge	capital_world	Sofia is to Bulgaria as Tunis is to	tunisia	Tunisia	0.43	1	1	{'Tunisia': 0.43, '__': 0.07, 'what': 0.07, '______': 0.04, '___': 0.04}	0	0.431641	0	1	key	key|target	0.86	TRUE	TRUE	TRUE	target	{'tunisia': 0.86}
Factual Knowledge	country_capital	Budapest is to Hungary as Cairo is to	egypt	Egypt	0.42	1	1	{'Egypt': 0.42, '______': 0.08, '__': 0.06, 'what': 0.03, ':': 0.03}	0	0.419922	0	1	key	key|target	0.86	TRUE	TRUE	TRUE	target	{'egypt': 0.86}
Factual Knowledge	capital_world	Budapest is to Hungary as Cairo is to	egypt	Egypt	0.42	1	1	{'Egypt': 0.42, '______': 0.08, '__': 0.06, 'what': 0.03, ':': 0.03}	0	0.419922	0	1	key	key|target	0.86	TRUE	TRUE	TRUE	target	{'egypt': 0.86}
Factual Knowledge	name_occupation	dante is to poet as einstein is to	physicist	scientist	0.4	0	1	{'scientist': 0.4, 'physicist': 0.21, 'genius': 0.03, '______': 0.02, '': 0.02}	1	0.212891	0.185547	0.99999	key	key|target	0.86	TRUE	TRUE	TRUE	target	{'physicist': 0.86}
Factual Knowledge	name_occupation	dante is to poet as newton is to	scientist	scientist	0.39	1	1	{'scientist': 0.39, 'physicist': 0.14, 'mathematic': 0.03, '"': 0.02, 'physics': 0.02}	0	0.394531	0	1	key	key|target	0.86	TRUE	TRUE	TRUE	target	{'scientist': 0.86}
Factual Knowledge	country_capital	Serbia is to Belgrade as Iran is to	tehran	Tehran	0.35	1	1	{'Tehran': 0.35, '______': 0.11, '__': 0.09, '____': 0.04, '___': 0.03}	0	0.347656	0	1	key	key|target	0.86	TRUE	TRUE	TRUE	target	{'tehran': 0.86}
Factual Knowledge	capital_world	Venezuela is to Caracas as Syria is to	damascus	Damascus	0.34	1	1	{'Damascus': 0.34, '______': 0.09, '__': 0.08, ':': 0.03}	0	0.34375	0	1	key	key|target	0.86	TRUE	TRUE	TRUE	target	{'damascus': 0.86}
Factual Knowledge	country_capital	Paris is to France as Vienna is to	austria	Austria	0.3	1	1	{'Austria': 0.3, 'what': 0.11, '______': 0.08, 'which': 0.05, '__': 0.04}	0	0.304688	0	1	key	key|target	0.86	TRUE	TRUE	TRUE	target	{'austria': 0.86}
Factual Knowledge	capital_world	Paris is to France as Vienna is to	austria	Austria	0.3	1	1	{'Austria': 0.3, 'what': 0.11, '______': 0.08, 'which': 0.05, '__': 0.04}	0	0.304688	0	1	key	key|target	0.86	TRUE	TRUE	TRUE	target	{'austria': 0.86}
Factual Knowledge	capital_world	Lithuania is to Vilnius as Thailand is to	bangkok	Bangkok	0.28	1	1	{'Bangkok': 0.28, '______': 0.09, '__': 0.08, 'what': 0.08, '_____': 0.03}	0	0.28125	0	1	key	key|target	0.86	TRUE	TRUE	TRUE	target	{'bangkok': 0.86}
Factual Knowledge	country_capital	Indonesia is to Jakarta as Italy is to	rome	Rome	0.28	1	1	{'Rome': 0.28, ':': 0.07, '?': 0.06, '__': 0.05, '______': 0.04}	0	0.275391	0	1	key	key|target	0.86	TRUE	TRUE	TRUE	target	{'rome': 0.86}
Factual Knowledge	country_capital	Germany is to Berlin as Philippines is to	manila	Manila	0.27	1	1	{'Manila': 0.27, '______': 0.14, '__': 0.05, '____': 0.05, '_____': 0.04}	0	0.267578	0	1	key	key|target	0.86	TRUE	TRUE	TRUE	target	{'manila': 0.86}
Factual Knowledge	capital_world	Canada is to Ottawa as Norway is to	oslo	Oslo	0.25	1	1	{'Oslo': 0.25, '______': 0.09, '__': 0.06, '____': 0.03, '?': 0.03}	0	0.251953	0	1	key	key|target	0.86	TRUE	TRUE	TRUE	target	{'oslo': 0.86}
Factual Knowledge	capital_world	Ljubljana is to Slovenia as Sofia is to	bulgaria	what	0.21	0	1	{'what': 0.21, 'which': 0.16, 'Bulgaria': 0.07, '?': 0.07, ':': 0.06}	2	0.0727539	0.137207	0.99998	key	key|target	0.86	TRUE	TRUE	TRUE	target	{'bulgaria': 0.86}
Factual Knowledge	country_language	Guatemala is to Spanish as Iran is to	persian	F	0.2	0	1	{'F': 0.2, 'Persian': 0.14, 'Arabic': 0.13, '______': 0.1, '_____': 0.05}	1	0.139648	0.0625	0.99999	key	key|target	0.86	TRUE	TRUE	TRUE	target	{'persian': 0.86}
Factual Knowledge	name_occupation	aristotle is to philosopher as moses is to	prophet	prophet	0.18	1	1	{'prophet': 0.18, 'what': 0.05, '': 0.03, '?': 0.03}	0	0.18457	0	1	key	key|target	0.86	TRUE	TRUE	TRUE	target	{'prophet': 0.86}
Factual Knowledge	capital_world	Venezuela is to Caracas as Spain is to	madrid	Madrid	0.18	1	1	{'Madrid': 0.18, ':': 0.05, '______': 0.08, 'Barcelona': 0.07}	0	0.183594	0	1	key	key|target	0.86	TRUE	TRUE	TRUE	target	{'madrid': 0.86}
Factual Knowledge	capital_world	Algeria is to Algiers as Egypt is to	cairo	?	0.16	0	1	{'?': 0.16, ':': 0.05, 'what': 0.05, 'Cairo': 0.04}	4	0.0444336	0.11084	0.99996	key	key|target	0.86	TRUE	TRUE	TRUE	target	{'cairo': 0.86}
Factual Knowledge	capital_world	Paramaribo is to Suriname as Abuja is to	nigeria	Nigeria	0.15	1	1	{'Nigeria': 0.15, '______': 0.13, '__': 0.11, 'what': 0.09, 'which': 0.08}	0	0.147461	0	1	key	key|target	0.86	TRUE	TRUE	TRUE	target	{'nigeria': 0.86}
Factual Knowledge	capital_world	Fiji is to Suva as Thailand is to	bangkok	Bangkok	0.14	1	1	{'Bangkok': 0.14, '_____': 0.09, '______': 0.09, '__': 0.06, ':': 0.04}	0	0.139648	0	1	key	key|target	0.86	TRUE	TRUE	TRUE	target	{'bangkok': 0.86}
Factual Knowledge	country_language	Chile is to Spanish as Iran is to	persian	______	0.13	0	1	{'______': 0.13, 'Persian': 0.1, 'F': 0.1, '_____': 0.08, 'Arabic': 0.08}	2	0.0991211	0.0288086	0.99998	key	key|target	0.86	TRUE	TRUE	TRUE	target	{'persian': 0.86}
Factual Knowledge	country_capital	Bangladesh is to Dhaka as Ireland is to	dublin	______	0.13	0	1	{'______': 0.13, 'Dublin': 0.11, ':': 0.09, '__': 0.07, '____': 0.07}	1	0.106934	0.0219727	0.99999	key	key|target	0.86	TRUE	TRUE	TRUE	target	{'dublin': 0.86}
Factual Knowledge	capital_world	Bangladesh is to Dhaka as Ireland is to	dublin	______	0.13	0	1	{'______': 0.13, 'Dublin': 0.11, ':': 0.09, '__': 0.07, '____': 0.07}	1	0.106934	0.0219727	0.99999	key	key|target	0.86	TRUE	TRUE	TRUE	target	{'dublin': 0.86}
Factual Knowledge	name_occupation	hume is to philosopher as strauss is to	composer	political	0.08	0	1	{'political': 0.08, 'musician': 0.07, 'politician': 0.07, 'composer': 0.06, 'philosopher': 0.04}	3	0.0649414	0.0136719	0.99997	key	key|target	0.86	TRUE	TRUE	TRUE	target	{'composer': 0.86}
Factual Knowledge	capital_world	Canada is to Ottawa as Nigeria is to	abuja	Abu	0.57	0.5	0.5	{'Abu': 0.57, '______': 0.05, 'Lagos': 0.04, '_____': 0.03, '__': 0.03}	0	0.574219	0	1	key	key|target	0.86	TRUE	TRUE	TRUE	target	{'abuja': 0.86}
Factual Knowledge	capital_world	Tbilisi is to Georgia as Asmara is to	eritrea	E	0.54	0.5	0.5	{'E': 0.54, 'what': 0.1, '__': 0.05, 'Ethiopia': 0.03, 'which': 0.02}	32	0.00218201	0.540787	0.999681	key	key|target	0.86	TRUE	TRUE	TRUE	target	{'eritrea': 0.86}
Factual Knowledge	capital_world	Jakarta is to Indonesia as Maputo is to	mozambique	Moz	0.5	0.5	0.5	{'Moz': 0.5, 'what': 0.14, 'which': 0.07, '?': 0.03, '__': 0.03}	0	0.498047	0	1	key	key|target	0.86	TRUE	TRUE	TRUE	target	{'mozambique': 0.86}
Factual Knowledge	capital_world	Taipei is to Taiwan as Asmara is to	eritrea	E	0.47	0.5	0.5	{'E': 0.47, 'what': 0.16, '__': 0.04, '?': 0.03, 'which': 0.02}	29	0.00308228	0.467621	0.999711	key	key|target	0.86	TRUE	TRUE	TRUE	target	{'eritrea': 0.86}
Factual Knowledge	capital_world	Lithuania is to Vilnius as Slovakia is to	bratislava	Br	0.41	0.5	0.5	{'Br': 0.41, '______': 0.11, '__': 0.04, 'what': 0.04, '"': 0.02}	0	0.414062	0	1	key	key|target	0.86	TRUE	TRUE	TRUE	target	{'bratislava': 0.86}
Factual Knowledge	capital_world	Canada is to Ottawa as Jordan is to	amman	Am	0.36	0.5	0.5	{'Am': 0.36, '__': 0.12, 'A': 0.06, '______': 0.05, 'what': 0.03}	0	0.355469	0	1	key	key|target	0.86	TRUE	TRUE	TRUE	target	{'amman': 0.86}
Factual Knowledge	capital_world	Malta is to Valletta as Nigeria is to	abuja	Abu	0.35	0.5	0.5	{'Abu': 0.35, 'Lagos': 0.09, '______': 0.08, '__': 0.04, '_____': 0.04}	0	0.345703	0	1	key	key|target	0.86	TRUE	TRUE	TRUE	target	{'abuja': 0.86}
Factual Knowledge	name_occupation	hume is to philosopher as michelangelo is to	sculptor	artist	0.35	0	0.5	{'artist': 0.35, 'sculpt': 0.2, 'painter': 0.04, '__': 0.02, '?': 0.02}	1	0.197266	0.148438	0.99999	key	key|target	0.86	TRUE	TRUE	TRUE	target	{'sculptor': 0.86}
Factual Knowledge	capital_world	Eritrea is to Asmara as Vietnam is to	hanoi	H	0.32	0.5	0.5	{'H': 0.32, '______': 0.07, '?': 0.05, '__': 0.05, 'what': 0.03}	12	0.0166016	0.305664	0.99988	key	key|target	0.86	TRUE	TRUE	TRUE	target	{'hanoi': 0.86}
Factual Knowledge	capital_world	Santiago is to Chile as Asmara is to	eritrea	what	0.31	0	0.5	{'what': 0.31, 'E': 0.16, '?': 0.1, 'which': 0.06, '__': 0.03}	28	0.0039978	0.308502	0.999721	key	key|target	0.86	TRUE	TRUE	TRUE	target	{'eritrea': 0.86}
Factual Knowledge	capital_world	Uzbekistan is to Tashkent as Malta is to	valletta	Val	0.31	0.5	0.5	{'Val': 0.31, '__': 0.05, '': 0.05, ':': 0.04, 'what': 0.04}	0	0.314453	0	1	key	key|target	0.86	TRUE	TRUE	TRUE	target	{'valletta': 0.86}
Factual Knowledge	capital_world	Madagascar is to Antananarivo as Gambia is to	banjul	Ban	0.31	0.5	0.5	{'Ban': 0.31, '__': 0.06, '"': 0.05, '____': 0.05, '______': 0.04}	0	0.314453	0	1	key	key|target	0.86	TRUE	TRUE	TRUE	target	{'banjul': 0.86}
Factual Knowledge	capital_world	Mozambique is to Maputo as Honduras is to	tegucigalpa	T	0.3	0.5	0.5	{'T': 0.3, '______': 0.1, '__': 0.07, ':': 0.05, '': 0.03}	45	0.00224304	0.300491	0.999552	key	key|target	0.86	TRUE	TRUE	TRUE	target	{'tegucigalpa': 0.86}
Factual Knowledge	name_occupation	dickens is to novelist as euler is to	mathematician	mathematic	0.29	0.5	0.5	{'mathematic': 0.29, ':': 0.03, '': 0.02, '"': 0.02}	0	0.294922	0	1	key	key|target	0.86	TRUE	TRUE	TRUE	target	{'mathematician': 0.86}
Factual Knowledge	capital_world	Chile is to Santiago as Malta is to	valletta	Val	0.28	0.5	0.5	{'Val': 0.28, '__': 0.08, '______': 0.07, 'Va': 0.05, ':': 0.04}	0	0.279297	0	1	key	key|target	0.86	TRUE	TRUE	TRUE	target	{'valletta': 0.86}
Factual Knowledge	capital_world	France is to Paris as Libya is to	tripoli	Trip	0.27	0.5	0.5	{'Trip': 0.27, '______': 0.06, 'Benghazi': 0.04, '__': 0.04, ':': 0.04}	0	0.265625	0	1	key	key|target	0.86	TRUE	TRUE	TRUE	target	{'tripoli': 0.86}
Factual Knowledge	capital_world	Madagascar is to Antananarivo as Moldova is to	chisinau	Ch	0.25	0.5	0.5	{'Ch': 0.25, 'K': 0.07, ':': 0.04, '______': 0.04}	0	0.249023	0	1	key	key|target	0.86	TRUE	TRUE	TRUE	target	{'chisinau': 0.86}
Factual Knowledge	capital_world	France is to Paris as Albania is to	tirana	Tir	0.23	0.5	0.5	{'Tir': 0.23, '______': 0.05, '?': 0.04, '__': 0.04, ':': 0.03}	0	0.230469	0	1	key	key|target	0.86	TRUE	TRUE	TRUE	target	{'tirana': 0.86}
Factual Knowledge	capital_world	Kyrgyzstan is to Bishkek as Rwanda is to	kigali	K	0.23	0.5	0.5	{'K': 0.23, '______': 0.08, '__': 0.05, ':': 0.05, '?': 0.04}	667	1.57356e-05	0.23143	0.993353	key	key|target	0.86	TRUE	TRUE	TRUE	target	{'kigali': 0.86}
Factual Knowledge	capital_world	Honduras is to Tegucigalpa as Nigeria is to	abuja	Abu	0.22	0.5	0.5	{'Abu': 0.22, '______': 0.1, '__': 0.07, 'what': 0.06, '____': 0.04}	0	0.21582	0	1	key	key|target	0.86	TRUE	TRUE	TRUE	target	{'abuja': 0.86}
Factual Knowledge	capital_world	Fiji is to Suva as Gambia is to	banjul	Ban	0.21	0.5	0.5	{'Ban': 0.21, ':': 0.05, '"': 0.06, '__': 0.05}	0	0.214844	0	1	key	key|target	0.86	TRUE	TRUE	TRUE	target	{'banjul': 0.86}
Factual Knowledge	capital_world	Azerbaijan is to Baku as Belize is to	belmopan	Bel	0.19	0.5	0.5	{'Bel': 0.19, ':': 0.13, '______': 0.07, 'Belize': 0.06, '__': 0.06}	0	0.1875	0	1	key	key|target	0.86	TRUE	TRUE	TRUE	target	{'belmopan': 0.86}
Factual Knowledge	capital_world	Nepal is to Kathmandu as Ecuador is to	quito	Q	0.17	0.5	0.5	{'Q': 0.17, '__': 0.14, '______': 0.13, ':': 0.03}	1488	4.32134e-06	0.165035	0.985172	key	key|target	0.86	TRUE	TRUE	TRUE	target	{'quito': 0.86}
Factual Knowledge	capital_world	Venezuela is to Caracas as Tajikistan is to	dushanbe	D	0.15	0.5	0.5	{'D': 0.15, ':': 0.06, '?': 0.06, '': 0.03}	1319	6.85453e-06	0.146478	0.986856	key	key|target	0.86	TRUE	TRUE	TRUE	target	{'dushanbe': 0.86}
Factual Knowledge	country_capital	Kenya is to Nairobi as Croatia is to	zagreb	Zag	0.12	0.5	0.5	{'Zag': 0.12, ':': 0.07, '______': 0.05, 'what': 0.05, '__': 0.04}	0	0.115723	0	1	key	key|target	0.86	TRUE	TRUE	TRUE	target	{'zagreb': 0.86}
Factual Knowledge	capital_world	Eritrea is to Asmara as Romania is to	bucharest	?	0.1	0	0.5	{'?': 0.1, 'Buch': 0.06, '______': 0.06, '': 0.05}	1	0.0615234	0.0400391	0.99999	key	key|target	0.86	TRUE	TRUE	TRUE	target	{'bucharest': 0.86}
Factual Knowledge	capital_world	Uzbekistan is to Tashkent as Turkmenistan is to	ashgabat		0.08	0	0.5	{'': 0.08, 'Ash': 0.07, '?': 0.05, ':': 0.05, 'A': 0.05}	1	0.0727539	0.00488281	0.99999	key	key|target	0.86	TRUE	TRUE	TRUE	target	{'ashgabat': 0.86}
Factual Knowledge	country_capital	Canberra is to Australia as Manila is to	philippines	the	0.57	0	0	{'the': 0.57, '______': 0.08, '__': 0.05, '___': 0.03, 'what': 0.03}	8	0.0151978	0.555115	0.99992	key	key|target	0.86	TRUE	TRUE	TRUE	target	{'philippines': 0.86}
Factual Knowledge	capital_world	Canberra is to Australia as Manila is to	philippines	the	0.57	0	0	{'the': 0.57, '______': 0.08, '__': 0.05, '___': 0.03, 'what': 0.03}	8	0.0151978	0.555115	0.99992	key	key|target	0.86	TRUE	TRUE	TRUE	target	{'philippines': 0.86}
Factual Knowledge	capital_world	Suva is to Fiji as Valletta is to	malta	Malta	0.96	1	1	{'Malta': 0.96, 'the': 0.0, '': 0.0, '______': 0.0, 'what': 0.0}	0	0.964844	0	1	key	key|target	0.85	TRUE	TRUE	TRUE	target	{'malta': 0.85}
Factual Knowledge	capital_world	Caracas is to Venezuela as Damascus is to	syria	Syria	0.95	1	1	{'Syria': 0.95, '______': 0.01, '': 0.01, 'what': 0.0, '__': 0.0}	0	0.949219	0	1	key	key|target	0.85	TRUE	TRUE	TRUE	target	{'syria': 0.85}
Factual Knowledge	country_language	Moldova is to Moldovan as Norway is to	norwegian	Norwegian	0.94	1	1	{'Norwegian': 0.94, 'Nor': 0.02, 'Norse': 0.01, 'N': 0.0, 'Nordic': 0.0}	0	0.941406	0	1	key	key|target	0.85	TRUE	TRUE	TRUE	target	{'norwegian': 0.85}
Factual Knowledge	country_capital	Kiev is to Ukraine as Tehran is to	iran	Iran	0.92	1	1	{'Iran': 0.92, 'Pers': 0.01, '______': 0.01, 'what': 0.01, 'the': 0.0}	0	0.917969	0	1	key	key|target	0.85	TRUE	TRUE	TRUE	target	{'iran': 0.85}
Factual Knowledge	capital_world	Ljubljana is to Slovenia as Ottawa is to	canada	Canada	0.92	1	1	{'Canada': 0.92, '__': 0.01, '______': 0.01, 'what': 0.0, '': 0.0}	0	0.917969	0	1	key	key|target	0.85	TRUE	TRUE	TRUE	target	{'canada': 0.85}
Factual Knowledge	country_capital	Conakry is to Guinea as Copenhagen is to	denmark	Denmark	0.91	1	1	{'Denmark': 0.91, '__': 0.01, '______': 0.01, 'Sweden': 0.01, '': 0.0}	0	0.914062	0	1	key	key|target	0.85	TRUE	TRUE	TRUE	target	{'denmark': 0.85}
Factual Knowledge	country_capital	Beirut is to Lebanon as Stockholm is to	sweden	Sweden	0.91	1	1	{'Sweden': 0.91, 'Scandin': 0.03, 'the': 0.0, 'what': 0.0, '': 0.0}	0	0.914062	0	1	key	key|target	0.85	TRUE	TRUE	TRUE	target	{'sweden': 0.85}
Factual Knowledge	capital_world	Vientiane is to Laos as Amman is to	jordan	Jordan	0.91	1	1	{'Jordan': 0.91, '__': 0.01, 'Iraq': 0.01, 'what': 0.01, '______': 0.01}	0	0.90625	0	1	key	key|target	0.85	TRUE	TRUE	TRUE	target	{'jordan': 0.85}
Factual Knowledge	capital_world	Conakry is to Guinea as Copenhagen is to	denmark	Denmark	0.91	1	1	{'Denmark': 0.91, '__': 0.01, '______': 0.01, 'Sweden': 0.01, '': 0.0}	0	0.914062	0	1	key	key|target	0.85	TRUE	TRUE	TRUE	target	{'denmark': 0.85}
Factual Knowledge	country_capital	Ottawa is to Canada as Stockholm is to	sweden	Sweden	0.86	1	1	{'Sweden': 0.86, 'what': 0.02, '______': 0.02, 'which': 0.01, '__': 0.01}	0	0.859375	0	1	key	key|target	0.85	TRUE	TRUE	TRUE	target	{'sweden': 0.85}
Factual Knowledge	capital_world	Ottawa is to Canada as Stockholm is to	sweden	Sweden	0.86	1	1	{'Sweden': 0.86, 'what': 0.02, '______': 0.02, 'which': 0.01, '__': 0.01}	0	0.859375	0	1	key	key|target	0.85	TRUE	TRUE	TRUE	target	{'sweden': 0.85}
Factual Knowledge	country_capital	Beirut is to Lebanon as Budapest is to	hungary	Hungary	0.84	1	1	{'Hungary': 0.84, '______': 0.03, 'Romania': 0.01, '__': 0.01, 'what': 0.01}	0	0.835938	0	1	key	key|target	0.85	TRUE	TRUE	TRUE	target	{'hungary': 0.85}
Factual Knowledge	capital_world	Beirut is to Lebanon as Budapest is to	hungary	Hungary	0.84	1	1	{'Hungary': 0.84, '______': 0.03, 'Romania': 0.01, '__': 0.01, 'what': 0.01}	0	0.835938	0	1	key	key|target	0.85	TRUE	TRUE	TRUE	target	{'hungary': 0.85}
Factual Knowledge	capital_world	Kingston is to Jamaica as Quito is to	ecuador	Ecuador	0.83	1	1	{'Ecuador': 0.83, '__': 0.03, '______': 0.02, 'what': 0.02, '_____': 0.01}	0	0.832031	0	1	key	key|target	0.85	TRUE	TRUE	TRUE	target	{'ecuador': 0.85}
Factual Knowledge	country_capital	Helsinki is to Finland as Manila is to	philippines	the	0.82	0	1	{'the': 0.82, 'Philippines': 0.05, '______': 0.02, 'The': 0.02, '__': 0.01}	1	0.0495605	0.774658	0.99999	key	key|target	0.85	TRUE	TRUE	TRUE	target	{'philippines': 0.85}
Factual Knowledge	capital_world	Helsinki is to Finland as Manila is to	philippines	the	0.82	0	1	{'the': 0.82, 'Philippines': 0.05, '______': 0.02, 'The': 0.02, '__': 0.01}	1	0.0495605	0.774658	0.99999	key	key|target	0.85	TRUE	TRUE	TRUE	target	{'philippines': 0.85}
Factual Knowledge	capital_world	Bujumbura is to Burundi as Damascus is to	syria	Syria	0.82	1	1	{'Syria': 0.82, 'what': 0.04, '______': 0.02, '__': 0.02, 'which': 0.01}	0	0.816406	0	1	key	key|target	0.85	TRUE	TRUE	TRUE	target	{'syria': 0.85}
Factual Knowledge	country_capital	Belgrade is to Serbia as Madrid is to	spain	Spain	0.81	1	1	{'Spain': 0.81, '______': 0.04, '__': 0.02, '_____': 0.01, 'what': 0.01}	0	0.8125	0	1	key	key|target	0.85	TRUE	TRUE	TRUE	target	{'spain': 0.85}
Factual Knowledge	name_occupation	dante is to poet as pacino is to	actor	actor	0.71	1	1	{'actor': 0.71, '': 0.01, 'what': 0.01, '?': 0.01, '____': 0.01}	0	0.714844	0	1	key	key|target	0.85	TRUE	TRUE	TRUE	target	{'actor': 0.85}
Factual Knowledge	capital_world	Paris is to France as Valletta is to	malta	Malta	0.68	1	1	{'Malta': 0.68, 'which': 0.04, 'what': 0.03, '______': 0.02, '__': 0.02}	0	0.675781	0	1	key	key|target	0.85	TRUE	TRUE	TRUE	target	{'malta': 0.85}
Factual Knowledge	capital_world	Bishkek is to Kyrgyzstan as Cairo is to	egypt	Egypt	0.68	1	1	{'Egypt': 0.68, '__': 0.03, ':': 0.03, '______': 0.03, '': 0.01}	0	0.679688	0	1	key	key|target	0.85	TRUE	TRUE	TRUE	target	{'egypt': 0.85}
Factual Knowledge	capital_world	Harare is to Zimbabwe as Kigali is to	rwanda	Rwanda	0.67	1	1	{'Rwanda': 0.67, '__': 0.03, '______': 0.03, '': 0.02, 'what': 0.02}	0	0.667969	0	1	key	key|target	0.85	TRUE	TRUE	TRUE	target	{'rwanda': 0.85}
Factual Knowledge	country_capital	Jakarta is to Indonesia as Taipei is to	taiwan	Taiwan	0.64	1	1	{'Taiwan': 0.64, '__': 0.04, '?': 0.03, '______': 0.02, 'which': 0.02}	0	0.636719	0	1	key	key|target	0.85	TRUE	TRUE	TRUE	target	{'taiwan': 0.85}
Factual Knowledge	capital_world	Kampala is to Uganda as Madrid is to	spain	Spain	0.64	1	1	{'Spain': 0.64, '______': 0.07, 'what': 0.03, '__': 0.03, '_____': 0.02}	0	0.636719	0	1	key	key|target	0.85	TRUE	TRUE	TRUE	target	{'spain': 0.85}
Factual Knowledge	capital_world	Madagascar is to Antananarivo as Greece is to	athens	Athens	0.64	1	1	{'Athens': 0.64, '__': 0.05, '______': 0.03, ':': 0.02, 'what': 0.02}	0	0.644531	0	1	key	key|target	0.85	TRUE	TRUE	TRUE	target	{'athens': 0.85}
Factual Knowledge	capital_world	Nairobi is to Kenya as Tegucigalpa is to	honduras	Honduras	0.63	1	1	{'Honduras': 0.63, 'what': 0.08, '______': 0.04, '__': 0.03, 'which': 0.02}	0	0.632812	0	1	key	key|target	0.85	TRUE	TRUE	TRUE	target	{'honduras': 0.85}
Factual Knowledge	name_nationality	hegel is to German as newton is to	english	English	0.62	1	1	{'English': 0.62, 'British': 0.09, 'english': 0.07, 'physics': 0.05, 'England': 0.02}	0	0.621094	0	1	key	key|target	0.85	TRUE	TRUE	TRUE	target	{'english': 0.85}
Factual Knowledge	capital_world	Skopje is to Macedonia as Astana is to	kazakhstan	Kazakhstan	0.6	1	1	{'Kazakhstan': 0.6, '': 0.04, '______': 0.04, '__': 0.03, 'what': 0.03}	0	0.597656	0	1	key	key|target	0.85	TRUE	TRUE	TRUE	target	{'kazakhstan': 0.85}
Factual Knowledge	country_language	Barbados is to English as Netherlands is to	dutch	Dutch	0.59	1	1	{'Dutch': 0.59, '______': 0.06, '__': 0.02, '': 0.02, '____': 0.01}	0	0.585938	0	1	key	key|target	0.85	TRUE	TRUE	TRUE	target	{'dutch': 0.85}
Factual Knowledge	capital_world	Islamabad is to Pakistan as Baghdad is to	iraq	Iraq	0.59	1	1	{'Iraq': 0.59, 'what': 0.07, '______': 0.06, '__': 0.04, ':': 0.02}	0	0.585938	0	1	key	key|target	0.85	TRUE	TRUE	TRUE	target	{'iraq': 0.85}
Factual Knowledge	country_language	Colombia is to Spanish as Netherlands is to	dutch	Dutch	0.57	1	1	{'Dutch': 0.57, '______': 0.05, ':': 0.03, '__': 0.02, '?': 0.02}	0	0.566406	0	1	key	key|target	0.85	TRUE	TRUE	TRUE	target	{'dutch': 0.85}
Factual Knowledge	name_occupation	andersen is to writer as hegel is to	philosopher	philosopher	0.55	1	1	{'philosopher': 0.55, 'thinker': 0.03, 'what': 0.01, 'philosophy': 0.01, 'logic': 0.01}	0	0.554688	0	1	key	key|target	0.85	TRUE	TRUE	TRUE	target	{'philosopher': 0.85}
Factual Knowledge	capital_world	Islamabad is to Pakistan as Kigali is to	rwanda	Rwanda	0.55	1	1	{'Rwanda': 0.55, '______': 0.04, '__': 0.03, 'what': 0.03, 'Bur': 0.02}	0	0.546875	0	1	key	key|target	0.85	TRUE	TRUE	TRUE	target	{'rwanda': 0.85}
Factual Knowledge	country_capital	Australia is to Canberra as England is to	london	London	0.5	1	1	{'London': 0.5, '______': 0.06, '__': 0.05, ':': 0.02}	0	0.503906	0	1	key	key|target	0.85	TRUE	TRUE	TRUE	target	{'london': 0.85}
Factual Knowledge	name_occupation	descartes is to mathematician as pacino is to	actor	actor	0.5	1	1	{'actor': 0.5, '': 0.02, 'what': 0.02, '__': 0.01, 'the': 0.01}	0	0.496094	0	1	key	key|target	0.85	TRUE	TRUE	TRUE	target	{'actor': 0.85}
Factual Knowledge	capital_world	Australia is to Canberra as England is to	london	London	0.5	1	1	{'London': 0.5, '______': 0.06, '__': 0.05, ':': 0.02}	0	0.503906	0	1	key	key|target	0.85	TRUE	TRUE	TRUE	target	{'london': 0.85}
Factual Knowledge	name_nationality	leibniz is to German as pascal is to	french	French	0.46	1	1	{'French': 0.46, 'french': 0.28, 'what': 0.02, 'France': 0.01, 'france': 0.01}	0	0.464844	0	1	key	key|target	0.85	TRUE	TRUE	TRUE	target	{'french': 0.85}
Factual Knowledge	country_capital	Baghdad is to Iraq as Canberra is to	australia	Australia	0.45	1	1	{'Australia': 0.45, '______': 0.11, '__': 0.07, '____': 0.04, '___': 0.03}	0	0.453125	0	1	key	key|target	0.85	TRUE	TRUE	TRUE	target	{'australia': 0.85}
Factual Knowledge	capital_world	Baghdad is to Iraq as Canberra is to	australia	Australia	0.45	1	1	{'Australia': 0.45, '______': 0.11, '__': 0.07, '____': 0.04, '___': 0.03}	0	0.453125	0	1	key	key|target	0.85	TRUE	TRUE	TRUE	target	{'australia': 0.85}
Factual Knowledge	capital_world	Lilongwe is to Malawi as Lima is to	peru	Peru	0.43	1	1	{'Peru': 0.43, 'what': 0.07, '______': 0.06, '__': 0.05, ':': 0.04}	0	0.433594	0	1	key	key|target	0.85	TRUE	TRUE	TRUE	target	{'peru': 0.85}
Factual Knowledge	country_capital	Islamabad is to Pakistan as Sofia is to	bulgaria	Bulgaria	0.42	1	1	{'Bulgaria': 0.42, 'what': 0.13, 'which': 0.08, ':': 0.06, '______': 0.04}	0	0.417969	0	1	key	key|target	0.85	TRUE	TRUE	TRUE	target	{'bulgaria': 0.85}
Factual Knowledge	capital_world	France is to Paris as Finland is to	helsinki	Helsinki	0.42	1	1	{'Helsinki': 0.42, '______': 0.05, '__': 0.03, 'what': 0.03, '____': 0.03}	0	0.423828	0	1	key	key|target	0.85	TRUE	TRUE	TRUE	target	{'helsinki': 0.85}
Factual Knowledge	name_occupation	mencius is to philosopher as shakespeare is to	playwright	playwright	0.4	1	1	{'playwright': 0.4, 'writer': 0.11, 'poet': 0.07, 'dram': 0.04, 'author': 0.04}	0	0.396484	0	1	key	key|target	0.85	TRUE	TRUE	TRUE	target	{'playwright': 0.85}
Factual Knowledge	capital_world	Montevideo is to Uruguay as Vilnius is to	lithuania	Lithuania	0.38	1	1	{'Lithuania': 0.38, 'what': 0.13, 'which': 0.09, '______': 0.03, ':': 0.03}	0	0.382812	0	1	key	key|target	0.85	TRUE	TRUE	TRUE	target	{'lithuania': 0.85}
Factual Knowledge	capital_world	Paris is to France as Skopje is to	macedonia	Macedonia	0.38	1	1	{'Macedonia': 0.38, 'what': 0.1, '______': 0.05, '__': 0.04, 'the': 0.04}	0	0.380859	0	1	key	key|target	0.85	TRUE	TRUE	TRUE	target	{'macedonia': 0.85}
Factual Knowledge	capital_world	Windhoek is to Namibia as Ankara is to	turkey	Turkey	0.37	1	1	{'Turkey': 0.37, 'what': 0.11, 'which': 0.11, '______': 0.09, '__': 0.07}	0	0.373047	0	1	key	key|target	0.85	TRUE	TRUE	TRUE	target	{'turkey': 0.85}
Factual Knowledge	country_capital	Australia is to Canberra as Iran is to	tehran	Tehran	0.36	1	1	{'Tehran': 0.36, '__': 0.07, '______': 0.05, ':': 0.03, '____': 0.03}	0	0.355469	0	1	key	key|target	0.85	TRUE	TRUE	TRUE	target	{'tehran': 0.85}
Factual Knowledge	capital_world	Apia is to Samoa as Astana is to	kazakhstan	Kazakhstan	0.36	1	1	{'Kazakhstan': 0.36, 'which': 0.2, 'what': 0.09, '?': 0.07, ':': 0.02}	0	0.359375	0	1	key	key|target	0.85	TRUE	TRUE	TRUE	target	{'kazakhstan': 0.85}
Factual Knowledge	capital_world	Australia is to Canberra as Iran is to	tehran	Tehran	0.36	1	1	{'Tehran': 0.36, '__': 0.07, '______': 0.05, ':': 0.03, '____': 0.03}	0	0.355469	0	1	key	key|target	0.85	TRUE	TRUE	TRUE	target	{'tehran': 0.85}
Factual Knowledge	name_nationality	kant is to German as pascal is to	french	French	0.35	1	1	{'French': 0.35, 'french': 0.22, 'English': 0.03, 'Pascal': 0.03, 'C': 0.02}	0	0.345703	0	1	key	key|target	0.85	TRUE	TRUE	TRUE	target	{'french': 0.85}
Factual Knowledge	capital_world	Kingston is to Jamaica as Skopje is to	macedonia	Macedonia	0.32	1	1	{'Macedonia': 0.32, 'what': 0.16, 'which': 0.09, 'the': 0.04, '__': 0.03}	0	0.318359	0	1	key	key|target	0.85	TRUE	TRUE	TRUE	target	{'macedonia': 0.85}
Factual Knowledge	capital_world	Nicosia is to Cyprus as Yerevan is to	armenia	Armenia	0.3	1	1	{'Armenia': 0.3, 'what': 0.14, 'which': 0.13, '__': 0.07, '____': 0.03}	0	0.304688	0	1	key	key|target	0.85	TRUE	TRUE	TRUE	target	{'armenia': 0.85}
Factual Knowledge	capital_world	Tuvalu is to Funafuti as Peru is to	lima	Lima	0.3	1	1	{'Lima': 0.3, '__': 0.06, '______': 0.06, 'C': 0.04, '____': 0.04}	0	0.298828	0	1	key	key|target	0.85	TRUE	TRUE	TRUE	target	{'lima': 0.85}
Factual Knowledge	name_nationality	balzac is to French as newton is to	english	English	0.29	1	1	{'English': 0.29, 'physics': 0.15, 'english': 0.11, 'British': 0.03, 'british': 0.02}	0	0.291016	0	1	key	key|target	0.85	TRUE	TRUE	TRUE	target	{'english': 0.85}
Factual Knowledge	capital_world	Helsinki is to Finland as Khartoum is to	sudan	Sudan	0.28	1	1	{'Sudan': 0.28, 'what': 0.15, '__': 0.08, '______': 0.07, '____': 0.04}	0	0.28125	0	1	key	key|target	0.85	TRUE	TRUE	TRUE	target	{'sudan': 0.85}
Factual Knowledge	country_capital	Dhaka is to Bangladesh as Taipei is to	taiwan	Taiwan	0.26	1	1	{'Taiwan': 0.26, '______': 0.06, ':': 0.06, '?': 0.05, '__': 0.05}	0	0.255859	0	1	key	key|target	0.85	TRUE	TRUE	TRUE	target	{'taiwan': 0.85}
Factual Knowledge	name_occupation	kepler is to mathematician as moses is to	prophet	prophet	0.26	1	1	{'prophet': 0.26, 'religious': 0.05, 'law': 0.04, 'politician': 0.03, 'jew': 0.03}	0	0.255859	0	1	key	key|target	0.85	TRUE	TRUE	TRUE	target	{'prophet': 0.85}
Factual Knowledge	name_occupation	descartes is to mathematician as newton is to	scientist	physicist	0.25	0	1	{'physicist': 0.25, 'scientist': 0.21, '': 0.03, 'physics': 0.02, '?': 0.02}	1	0.209961	0.0439453	0.99999	key	key|target	0.85	TRUE	TRUE	TRUE	target	{'scientist': 0.85}
Factual Knowledge	country_language	Ecuador is to Spanish as Iran is to	persian	F	0.24	0	1	{'F': 0.24, 'Persian': 0.18, 'Arabic': 0.13, '______': 0.08, '_____': 0.04}	1	0.183594	0.0517578	0.99999	key	key|target	0.85	TRUE	TRUE	TRUE	target	{'persian': 0.85}
Factual Knowledge	country_capital	Ukraine is to Kiev as Portugal is to	lisbon	Lisbon	0.23	1	1	{'Lisbon': 0.23, '______': 0.08, '__': 0.07, ':': 0.04}	0	0.227539	0	1	key	key|target	0.85	TRUE	TRUE	TRUE	target	{'lisbon': 0.85}
Factual Knowledge	capital_world	Bishkek is to Kyrgyzstan as Kigali is to	rwanda	Rwanda	0.23	1	1	{'Rwanda': 0.23, '__': 0.06, '?': 0.06, ':': 0.06, 'what': 0.06}	0	0.225586	0	1	key	key|target	0.85	TRUE	TRUE	TRUE	target	{'rwanda': 0.85}
Factual Knowledge	capital_world	Ukraine is to Kiev as Portugal is to	lisbon	Lisbon	0.23	1	1	{'Lisbon': 0.23, '______': 0.08, '__': 0.07, ':': 0.04}	0	0.227539	0	1	key	key|target	0.85	TRUE	TRUE	TRUE	target	{'lisbon': 0.85}
Factual Knowledge	country_capital	Dhaka is to Bangladesh as Sofia is to	bulgaria	Bulgaria	0.2	1	1	{'Bulgaria': 0.2, 'what': 0.1, ':': 0.1, 'which': 0.08, '______': 0.07}	0	0.200195	0	1	key	key|target	0.85	TRUE	TRUE	TRUE	target	{'bulgaria': 0.85}
Factual Knowledge	name_occupation	descartes is to mathematician as stalin is to	dictator	politician	0.16	0	1	{'politician': 0.16, 'dictator': 0.12, 'communist': 0.03, 'states': 0.03, 'russian': 0.03}	1	0.115234	0.0429688	0.99999	key	key|target	0.85	TRUE	TRUE	TRUE	target	{'dictator': 0.85}
Factual Knowledge	capital_world	France is to Paris as Tunisia is to	tunis	Tunis	0.16	1	1	{'Tunis': 0.16, '__': 0.11, '______': 0.09, '____': 0.05, 'what': 0.04}	0	0.163086	0	1	key	key|target	0.85	TRUE	TRUE	TRUE	target	{'tunis': 0.85}
Factual Knowledge	capital_world	Ottawa is to Canada as Ankara is to	turkey	Turkey	0.15	1	1	{'Turkey': 0.15, 'what': 0.14, '______': 0.09, 'which': 0.07, '__': 0.06}	0	0.150391	0	1	key	key|target	0.85	TRUE	TRUE	TRUE	target	{'turkey': 0.85}
Factual Knowledge	country_language	Barbados is to English as Iran is to	persian	Arabic	0.14	0	1	{'Arabic': 0.14, 'Persian': 0.14, '______': 0.09, 'F': 0.07, '_____': 0.05}	1	0.142578	0	0.99999	key	key|target	0.85	TRUE	TRUE	TRUE	target	{'persian': 0.85}
Factual Knowledge	name_occupation	dickens is to novelist as hitler is to	dictator	dictator	0.12	1	1	{'dictator': 0.12, 'politician': 0.07, ':': 0.03, 'leader': 0.03, 'states': 0.03}	0	0.120605	0	1	key	key|target	0.85	TRUE	TRUE	TRUE	target	{'dictator': 0.85}
Factual Knowledge	capital_world	Germany is to Berlin as Zimbabwe is to	harare	Har	0.79	0.5	0.5	{'Har': 0.79, '______': 0.02, 'Zimbabwe': 0.01, 'Bul': 0.01, '__': 0.01}	0	0.789062	0	1	key	key|target	0.85	TRUE	TRUE	TRUE	target	{'harare': 0.85}
Factual Knowledge	capital_world	Ukraine is to Kiev as Somalia is to	mogadishu	Mog	0.64	0.5	0.5	{'Mog': 0.64, '______': 0.05, '__': 0.04, '_____': 0.02, 'what': 0.02}	0	0.644531	0	1	key	key|target	0.85	TRUE	TRUE	TRUE	target	{'mogadishu': 0.85}
Factual Knowledge	UK_city_county	cambridge is to cambridgeshire as chester is to	cheshire	ch	0.59	0.5	0.5	{'ch': 0.59, 'che': 0.05, '': 0.01, '__': 0.01}	0	0.589844	0	1	key	key|target	0.85	TRUE	TRUE	TRUE	target	{'cheshire': 0.85}
Factual Knowledge	capital_world	Vientiane is to Laos as Asmara is to	eritrea	E	0.58	0.5	0.5	{'E': 0.58, 'what': 0.11, '__': 0.04, 'which': 0.03, 'Ethiopia': 0.02}	36	0.00125885	0.580772	0.999641	key	key|target	0.85	TRUE	TRUE	TRUE	target	{'eritrea': 0.85}
Factual Knowledge	capital_world	Dhaka is to Bangladesh as Georgetown is to	guyana	Guy	0.47	0.5	0.5	{'Guy': 0.47, '______': 0.05, 'what': 0.05, 'which': 0.04, '__': 0.03}	0	0.470703	0	1	key	key|target	0.85	TRUE	TRUE	TRUE	target	{'guyana': 0.85}
Factual Knowledge	capital_world	Ukraine is to Kiev as Zambia is to	lusaka	L	0.41	0.5	0.5	{'L': 0.41, '__': 0.06, ':': 0.04, '______': 0.04, '____': 0.03}	124	0.000354767	0.413708	0.998764	key	key|target	0.85	TRUE	TRUE	TRUE	target	{'lusaka': 0.85}
Factual Knowledge	UK_city_county	norwich is to norfolk as worcester is to	worcestershire	wor	0.37	0.5	0.5	{'wor': 0.37, 'mass': 0.07, '______': 0.05, 'what': 0.05, '_____': 0.03}	0	0.373047	0	1	key	key|target	0.85	TRUE	TRUE	TRUE	target	{'worcestershire': 0.85}
Factual Knowledge	capital_world	Uzbekistan is to Tashkent as Croatia is to	zagreb	Zag	0.37	0.5	0.5	{'Zag': 0.37, 'what': 0.05, '"': 0.05, '__': 0.03, '': 0.03}	0	0.371094	0	1	key	key|target	0.85	TRUE	TRUE	TRUE	target	{'zagreb': 0.85}
Factual Knowledge	UK_city_county	salford is to manchester as worcester is to	worcestershire	b	0.29	0	0.5	{'b': 0.29, 'br': 0.07, 'gl': 0.06, 'wor': 0.03, 'what': 0.03}	4	0.0303955	0.258667	0.99996	key	key|target	0.85	TRUE	TRUE	TRUE	target	{'worcestershire': 0.85}
Factual Knowledge	name_occupation	descartes is to mathematician as michelangelo is to	sculptor	artist	0.29	0	0.5	{'artist': 0.29, 'sculpt': 0.18, 'painter': 0.04, 'what': 0.02, '__': 0.02}	1	0.18457	0.100586	0.99999	key	key|target	0.85	TRUE	TRUE	TRUE	target	{'sculptor': 0.85}
Factual Knowledge	capital_world	Baku is to Azerbaijan as Banjul is to	gambia	G	0.28	0.5	0.5	{'G': 0.28, 'The': 0.18, 'the': 0.12, '__': 0.04, '___': 0.04}	61	0.000793457	0.27655	0.999392	key	key|target	0.85	TRUE	TRUE	TRUE	target	{'gambia': 0.85}
Factual Knowledge	capital_world	Laos is to Vientiane as Eritrea is to	asmara	As	0.24	0.5	0.5	{'As': 0.24, '?': 0.04, 'what': 0.05, '__': 0.05}	0	0.235352	0	1	key	key|target	0.85	TRUE	TRUE	TRUE	target	{'asmara': 0.85}
Factual Knowledge	capital_world	Somalia is to Mogadishu as Georgia is to	tbilisi	T	0.22	0.5	0.5	{'T': 0.22, 'what': 0.07, '?': 0.06, '__': 0.06, 'Atlanta': 0.05}	53	0.00143433	0.217316	0.999472	key	key|target	0.85	TRUE	TRUE	TRUE	target	{'tbilisi': 0.85}
Factual Knowledge	capital_world	Indonesia is to Jakarta as Cyprus is to	nicosia	__	0.2	0	0.5	{'__': 0.2, 'N': 0.13, '____': 0.06, '?': 0.05, ':': 0.05}	182	0.000132561	0.200063	0.998186	key	key|target	0.85	TRUE	TRUE	TRUE	target	{'nicosia': 0.85}
Factual Knowledge	capital_world	Mozambique is to Maputo as Uzbekistan is to	tashkent	T	0.16	0.5	0.5	{'T': 0.16, ':': 0.05, '__': 0.05, '______': 0.04, '': 0.04}	1420	8.82149e-06	0.160147	0.98585	key	key|target	0.85	TRUE	TRUE	TRUE	target	{'tashkent': 0.85}
Factual Knowledge	capital_world	Uruguay is to Montevideo as Libya is to	tripoli	Trip	0.13	0.5	0.5	{'Trip': 0.13, '______': 0.07, '"': 0.06, ':': 0.05, '__': 0.05}	0	0.134766	0	1	key	key|target	0.85	TRUE	TRUE	TRUE	target	{'tripoli': 0.85}
Factual Knowledge	capital_world	Honduras is to Tegucigalpa as Eritrea is to	asmara	As	0.13	0.5	0.5	{'As': 0.13, '__': 0.08, 'what': 0.08, '?': 0.07, '______': 0.05}	0	0.130859	0	1	key	key|target	0.85	TRUE	TRUE	TRUE	target	{'asmara': 0.85}
Factual Knowledge	capital_world	Cyprus is to Nicosia as Liechtenstein is to	vaduz	?	0.11	0	0.5	{'?': 0.11, 'what': 0.08, 'Vad': 0.06, '__': 0.06, '______': 0.05}	2	0.0620117	0.043457	0.99998	key	key|target	0.85	TRUE	TRUE	TRUE	target	{'vaduz': 0.85}
Factual Knowledge	name_nationality	hegel is to German as maxwell is to	scottish	English	0.54	0	0	{'English': 0.54, 'British': 0.09, 'english': 0.07, 'American': 0.04, 'physics': 0.03}	5	0.0288086	0.51416	0.99995	key	key|target	0.85	TRUE	TRUE	TRUE	target	{'scottish': 0.85}
Factual Knowledge	country_capital	Jamaica is to Kingston as Georgia is to	tbilisi	Atlanta	0.49	0	0	{'Atlanta': 0.49, '______': 0.04, '__': 0.04, ':': 0.02}	562	1.66893e-05	0.486311	0.9944	key	key|target	0.85	TRUE	TRUE	TRUE	target	{'tbilisi': 0.85}
Factual Knowledge	UK_city_county	birmingham is to midlands as newport is to	gwent	south	0.23	0	0	{'south': 0.23, 'w': 0.18, 'mon': 0.03, '?': 0.02, 'what': 0.02}	520	4.17233e-05	0.228474	0.994818	key	key|target	0.85	TRUE	TRUE	TRUE	target	{'gwent': 0.85}
Factual Knowledge	capital_world	Baghdad is to Iraq as Georgetown is to	guyana	the	0.23	0	0	{'the': 0.23, 'Washington': 0.18, '______': 0.08, 'what': 0.05, 'D': 0.04}	137	0.000268936	0.229223	0.998635	key	key|target	0.85	TRUE	TRUE	TRUE	target	{'guyana': 0.85}
Factual Knowledge	country_capital	Conakry is to Guinea as Damascus is to	syria	Syria	0.96	1	1	{'Syria': 0.96, '': 0.0, 'the': 0.0, '______': 0.0, '__': 0.0}	0	0.960938	0	1	key	key|target	0.84	TRUE	TRUE	TRUE	target	{'syria': 0.84}
Factual Knowledge	capital_world	Conakry is to Guinea as Damascus is to	syria	Syria	0.96	1	1	{'Syria': 0.96, '': 0.0, 'the': 0.0, '______': 0.0, '__': 0.0}	0	0.960938	0	1	key	key|target	0.84	TRUE	TRUE	TRUE	target	{'syria': 0.84}
Factual Knowledge	capital_world	Warsaw is to Poland as Canberra is to	australia	Australia	0.93	1	1	{'Australia': 0.93, '______': 0.01, 'what': 0.0, '__': 0.0, 'which': 0.0}	0	0.933594	0	1	key	key|target	0.84	TRUE	TRUE	TRUE	target	{'australia': 0.84}
Factual Knowledge	country_capital	Kiev is to Ukraine as Madrid is to	spain	Spain	0.91	1	1	{'Spain': 0.91, '______': 0.02, '__': 0.01, '_____': 0.01, 'what': 0.01}	0	0.90625	0	1	key	key|target	0.84	TRUE	TRUE	TRUE	target	{'spain': 0.84}
Factual Knowledge	capital_world	Kiev is to Ukraine as Madrid is to	spain	Spain	0.91	1	1	{'Spain': 0.91, '______': 0.02, '__': 0.01, '_____': 0.01, 'what': 0.01}	0	0.90625	0	1	key	key|target	0.84	TRUE	TRUE	TRUE	target	{'spain': 0.84}
Factual Knowledge	capital_world	Kathmandu is to Nepal as Lisbon is to	portugal	Portugal	0.9	1	1	{'Portugal': 0.9, '': 0.01, 'Europe': 0.01, '__': 0.01, 'what': 0.01}	0	0.902344	0	1	key	key|target	0.84	TRUE	TRUE	TRUE	target	{'portugal': 0.84}
Factual Knowledge	country_capital	Brussels is to Belgium as Damascus is to	syria	Syria	0.89	1	1	{'Syria': 0.89, '______': 0.01, '__': 0.01, 'what': 0.01, 'the': 0.01}	0	0.890625	0	1	key	key|target	0.84	TRUE	TRUE	TRUE	target	{'syria': 0.84}
Factual Knowledge	capital_world	Brussels is to Belgium as Damascus is to	syria	Syria	0.89	1	1	{'Syria': 0.89, '______': 0.01, '__': 0.01, 'what': 0.01, 'the': 0.01}	0	0.890625	0	1	key	key|target	0.84	TRUE	TRUE	TRUE	target	{'syria': 0.84}
Factual Knowledge	country_capital	Bangkok is to Thailand as Lisbon is to	portugal	Portugal	0.87	1	1	{'Portugal': 0.87, '______': 0.01, 'what': 0.01, '__': 0.01, '_____': 0.01}	0	0.867188	0	1	key	key|target	0.84	TRUE	TRUE	TRUE	target	{'portugal': 0.84}
Factual Knowledge	country_capital	Bangkok is to Thailand as Bucharest is to	romania	Romania	0.85	1	1	{'Romania': 0.85, '______': 0.02, 'what': 0.02, '__': 0.01, 'which': 0.01}	0	0.847656	0	1	key	key|target	0.84	TRUE	TRUE	TRUE	target	{'romania': 0.84}
Factual Knowledge	capital_world	Bangkok is to Thailand as Bucharest is to	romania	Romania	0.85	1	1	{'Romania': 0.85, '______': 0.02, 'what': 0.02, '__': 0.01, 'which': 0.01}	0	0.847656	0	1	key	key|target	0.84	TRUE	TRUE	TRUE	target	{'romania': 0.84}
Factual Knowledge	capital_world	Vientiane is to Laos as Yerevan is to	armenia	Armenia	0.8	1	1	{'Armenia': 0.8, 'what': 0.03, '__': 0.02, 'which': 0.02, '______': 0.01}	0	0.796875	0	1	key	key|target	0.84	TRUE	TRUE	TRUE	target	{'armenia': 0.84}
Factual Knowledge	country_capital	Taipei is to Taiwan as Tehran is to	iran	Iran	0.78	1	1	{'Iran': 0.78, 'what': 0.02, '______': 0.02, '__': 0.01, ':': 0.01}	0	0.78125	0	1	key	key|target	0.84	TRUE	TRUE	TRUE	target	{'iran': 0.84}
Factual Knowledge	capital_world	Kathmandu is to Nepal as Lusaka is to	zambia	Zambia	0.78	1	1	{'Zambia': 0.78, 'what': 0.03, '': 0.02, '__': 0.02, 'which': 0.01}	0	0.78125	0	1	key	key|target	0.84	TRUE	TRUE	TRUE	target	{'zambia': 0.84}
Factual Knowledge	capital_world	Kiev is to Ukraine as Montevideo is to	uruguay	Uruguay	0.78	1	1	{'Uruguay': 0.78, 'what': 0.06, '______': 0.02, '__': 0.01, 'which': 0.01}	0	0.78125	0	1	key	key|target	0.84	TRUE	TRUE	TRUE	target	{'uruguay': 0.84}
Factual Knowledge	capital_world	Valletta is to Malta as Bratislava is to	slovakia	Slovakia	0.78	1	1	{'Slovakia': 0.78, 'the': 0.03, 'what': 0.03, 'which': 0.02, '______': 0.02}	0	0.777344	0	1	key	key|target	0.84	TRUE	TRUE	TRUE	target	{'slovakia': 0.84}
Factual Knowledge	capital_world	Taipei is to Taiwan as Tehran is to	iran	Iran	0.78	1	1	{'Iran': 0.78, 'what': 0.02, '______': 0.02, '__': 0.01, ':': 0.01}	0	0.78125	0	1	key	key|target	0.84	TRUE	TRUE	TRUE	target	{'iran': 0.84}
Factual Knowledge	capital_world	Bishkek is to Kyrgyzstan as Bucharest is to	romania	Romania	0.77	1	1	{'Romania': 0.77, 'which': 0.03, 'what': 0.03, ':': 0.03, '______': 0.02}	0	0.769531	0	1	key	key|target	0.84	TRUE	TRUE	TRUE	target	{'romania': 0.84}
Factual Knowledge	capital_world	Caracas is to Venezuela as Dhaka is to	bangladesh	Bangladesh	0.72	1	1	{'Bangladesh': 0.72, '______': 0.04, 'what': 0.03, '__': 0.02, ':': 0.02}	0	0.722656	0	1	key	key|target	0.84	TRUE	TRUE	TRUE	target	{'bangladesh': 0.84}
Factual Knowledge	capital_world	Kabul is to Afghanistan as Mogadishu is to	somalia	Somalia	0.7	1	1	{'Somalia': 0.7, '______': 0.05, '__': 0.04, 'what': 0.02, '': 0.02}	0	0.695312	0	1	key	key|target	0.84	TRUE	TRUE	TRUE	target	{'somalia': 0.84}
Factual Knowledge	name_occupation	hegel is to philosopher as jolie is to	actress	actress	0.68	1	1	{'actress': 0.68, 'actor': 0.03, 'h': 0.02, '______': 0.01, 'what': 0.01}	0	0.675781	0	1	key	key|target	0.84	TRUE	TRUE	TRUE	target	{'actress': 0.84}
Factual Knowledge	country_language	Ecuador is to Spanish as Taiwan is to	chinese	Chinese	0.64	1	1	{'Chinese': 0.64, 'Mandarin': 0.24, '______': 0.02, '__': 0.01, 'Taiwanese': 0.01}	0	0.636719	0	1	key	key|target	0.84	TRUE	TRUE	TRUE	target	{'chinese': 0.84}
Factual Knowledge	capital_world	Dakar is to Senegal as Damascus is to	syria	Syria	0.63	1	1	{'Syria': 0.63, '______': 0.05, 'what': 0.05, '__': 0.04, ':': 0.03}	0	0.628906	0	1	key	key|target	0.84	TRUE	TRUE	TRUE	target	{'syria': 0.84}
Factual Knowledge	country_language	Bolivia is to Spanish as Taiwan is to	chinese	Chinese	0.62	1	1	{'Chinese': 0.62, 'Mandarin': 0.17, '______': 0.03, 'China': 0.02, '__': 0.01}	0	0.625	0	1	key	key|target	0.84	TRUE	TRUE	TRUE	target	{'chinese': 0.84}
Factual Knowledge	capital_world	Canada is to Ottawa as England is to	london	London	0.62	1	1	{'London': 0.62, '______': 0.06, '__': 0.04, ':': 0.02, '': 0.01}	0	0.621094	0	1	key	key|target	0.84	TRUE	TRUE	TRUE	target	{'london': 0.84}
Factual Knowledge	country_language	Cuba is to Spanish as Netherlands is to	dutch	Dutch	0.54	1	1	{'Dutch': 0.54, '______': 0.04, '': 0.03, 'English': 0.02, '?': 0.02}	0	0.542969	0	1	key	key|target	0.84	TRUE	TRUE	TRUE	target	{'dutch': 0.84}
Factual Knowledge	capital_world	Nairobi is to Kenya as Vilnius is to	lithuania	Lithuania	0.49	1	1	{'Lithuania': 0.49, 'what': 0.09, 'which': 0.09, '______': 0.03, ':': 0.02}	0	0.494141	0	1	key	key|target	0.84	TRUE	TRUE	TRUE	target	{'lithuania': 0.84}
Factual Knowledge	name_occupation	balzac is to novelist as beethoven is to	composer	composer	0.44	1	1	{'composer': 0.44, 'musician': 0.13, '?': 0.03, 'pian': 0.02, ':': 0.02}	0	0.443359	0	1	key	key|target	0.84	TRUE	TRUE	TRUE	target	{'composer': 0.84}
Factual Knowledge	country_language	Guyana is to English as Netherlands is to	dutch	Dutch	0.43	1	1	{'Dutch': 0.43, '______': 0.07, '': 0.04, ':': 0.03, '?': 0.03}	0	0.429688	0	1	key	key|target	0.84	TRUE	TRUE	TRUE	target	{'dutch': 0.84}
Factual Knowledge	name_nationality	leibniz is to German as maxwell is to	scottish	English	0.43	0	1	{'English': 0.43, 'english': 0.11, 'Scottish': 0.06, 'British': 0.05, 'sc': 0.02}	2	0.0620117	0.367676	0.99998	key	key|target	0.84	TRUE	TRUE	TRUE	target	{'scottish': 0.84}
Factual Knowledge	name_nationality	hegel is to German as pascal is to	french	French	0.43	1	1	{'French': 0.43, 'french': 0.29, 'France': 0.04, 'france': 0.03, 'English': 0.01}	0	0.425781	0	1	key	key|target	0.84	TRUE	TRUE	TRUE	target	{'french': 0.84}
Factual Knowledge	capital_world	Monrovia is to Liberia as Taipei is to	taiwan	Taiwan	0.41	1	1	{'Taiwan': 0.41, '__': 0.09, '______': 0.08, 'the': 0.04, ':': 0.04}	0	0.414062	0	1	key	key|target	0.84	TRUE	TRUE	TRUE	target	{'taiwan': 0.84}
Factual Knowledge	country_capital	Canberra is to Australia as Dhaka is to	bangladesh	Bangladesh	0.4	1	1	{'Bangladesh': 0.4, '______': 0.06, '?': 0.05, '__': 0.04, ':': 0.03}	0	0.402344	0	1	key	key|target	0.84	TRUE	TRUE	TRUE	target	{'bangladesh': 0.84}
Factual Knowledge	capital_world	Canberra is to Australia as Dhaka is to	bangladesh	Bangladesh	0.4	1	1	{'Bangladesh': 0.4, '______': 0.06, '?': 0.05, '__': 0.04, ':': 0.03}	0	0.402344	0	1	key	key|target	0.84	TRUE	TRUE	TRUE	target	{'bangladesh': 0.84}
Factual Knowledge	name_occupation	balzac is to novelist as pacino is to	actor	actor	0.39	1	1	{'actor': 0.39, '?': 0.03, ':': 0.03, '': 0.02}	0	0.390625	0	1	key	key|target	0.84	TRUE	TRUE	TRUE	target	{'actor': 0.84}
Factual Knowledge	capital_world	Quito is to Ecuador as Abuja is to	nigeria	Nigeria	0.37	1	1	{'Nigeria': 0.37, '______': 0.11, '__': 0.08, 'what': 0.04, '____': 0.04}	0	0.365234	0	1	key	key|target	0.84	TRUE	TRUE	TRUE	target	{'nigeria': 0.84}
Factual Knowledge	capital_world	Accra is to Ghana as Astana is to	kazakhstan	Kazakhstan	0.36	1	1	{'Kazakhstan': 0.36, 'which': 0.12, 'what': 0.09, '?': 0.06, '____': 0.03}	0	0.361328	0	1	key	key|target	0.84	TRUE	TRUE	TRUE	target	{'kazakhstan': 0.84}
Factual Knowledge	name_nationality	rousseau is to French as spinoza is to	dutch	Dutch	0.35	1	1	{'Dutch': 0.35, 'Hebrew': 0.08, 'Jewish': 0.06, 'English': 0.05, 'Latin': 0.04}	0	0.347656	0	1	key	key|target	0.84	TRUE	TRUE	TRUE	target	{'dutch': 0.84}
Factual Knowledge	name_occupation	balzac is to novelist as hawking is to	physicist	physicist	0.34	1	1	{'physicist': 0.34, 'scientist': 0.14, 'ast': 0.04, '?': 0.02, 'theoretical': 0.02}	0	0.335938	0	1	key	key|target	0.84	TRUE	TRUE	TRUE	target	{'physicist': 0.84}
Factual Knowledge	country_capital	Sweden is to Stockholm as Iran is to	tehran	Tehran	0.34	1	1	{'Tehran': 0.34, '______': 0.06, '__': 0.06, 'what': 0.03, ':': 0.03}	0	0.337891	0	1	key	key|target	0.84	TRUE	TRUE	TRUE	target	{'tehran': 0.84}
Factual Knowledge	capital_world	Chisinau is to Moldova as Dublin is to	ireland	Ireland	0.34	1	1	{'Ireland': 0.34, '______': 0.12, 'what': 0.1, 'the': 0.08, '__': 0.05}	0	0.335938	0	1	key	key|target	0.84	TRUE	TRUE	TRUE	target	{'ireland': 0.84}
Factual Knowledge	capital_world	Sweden is to Stockholm as Iran is to	tehran	Tehran	0.34	1	1	{'Tehran': 0.34, '______': 0.06, '__': 0.06, 'what': 0.03, ':': 0.03}	0	0.337891	0	1	key	key|target	0.84	TRUE	TRUE	TRUE	target	{'tehran': 0.84}
Factual Knowledge	country_capital	Germany is to Berlin as Peru is to	lima	Lima	0.32	1	1	{'Lima': 0.32, '______': 0.09, '__': 0.06, 'C': 0.05, 'what': 0.02}	0	0.324219	0	1	key	key|target	0.84	TRUE	TRUE	TRUE	target	{'lima': 0.84}
Factual Knowledge	capital_world	Germany is to Berlin as Peru is to	lima	Lima	0.32	1	1	{'Lima': 0.32, '______': 0.09, '__': 0.06, 'C': 0.05, 'what': 0.02}	0	0.324219	0	1	key	key|target	0.84	TRUE	TRUE	TRUE	target	{'lima': 0.84}
Factual Knowledge	capital_world	Doha is to Qatar as Hanoi is to	vietnam	Vietnam	0.3	1	1	{'Vietnam': 0.3, ':': 0.11, '______': 0.06, 'what': 0.04, '?': 0.04}	0	0.300781	0	1	key	key|target	0.84	TRUE	TRUE	TRUE	target	{'vietnam': 0.84}
Factual Knowledge	capital_world	Monrovia is to Liberia as Skopje is to	macedonia	what	0.29	0	1	{'what': 0.29, 'Macedonia': 0.12, 'which': 0.1, '__': 0.08, ':': 0.06}	1	0.122559	0.162598	0.99999	key	key|target	0.84	TRUE	TRUE	TRUE	target	{'macedonia': 0.84}
Factual Knowledge	name_occupation	descartes is to mathematician as moses is to	prophet	prophet	0.25	1	1	{'prophet': 0.25, 'law': 0.09, 'jew': 0.04, 'religious': 0.04, 'politician': 0.02}	0	0.24707	0	1	key	key|target	0.84	TRUE	TRUE	TRUE	target	{'prophet': 0.84}
Factual Knowledge	name_occupation	descartes is to mathematician as marx is to	philosopher	economist	0.25	0	1	{'economist': 0.25, 'philosopher': 0.21, 'politician': 0.03, 'political': 0.02, 'soci': 0.02}	1	0.205078	0.0419922	0.99999	key	key|target	0.84	TRUE	TRUE	TRUE	target	{'philosopher': 0.84}
Factual Knowledge	capital_world	Uzbekistan is to Tashkent as Iraq is to	baghdad	Baghdad	0.24	1	1	{'Baghdad': 0.24, '______': 0.09, '__': 0.07, 'what': 0.04, ':': 0.04}	0	0.238281	0	1	key	key|target	0.84	TRUE	TRUE	TRUE	target	{'baghdad': 0.84}
Factual Knowledge	capital_world	Guyana is to Georgetown as Cuba is to	havana	Havana	0.22	1	1	{'Havana': 0.22, '': 0.04, ':': 0.1, '______': 0.07}	0	0.217773	0	1	key	key|target	0.84	TRUE	TRUE	TRUE	target	{'havana': 0.84}
Factual Knowledge	country_language	Cuba is to Spanish as Iran is to	persian	Arabic	0.19	0	1	{'Arabic': 0.19, 'English': 0.12, 'Persian': 0.11, '______': 0.09, 'F': 0.07}	2	0.112305	0.0732422	0.99998	key	key|target	0.84	TRUE	TRUE	TRUE	target	{'persian': 0.84}
Factual Knowledge	capital_world	Libreville is to Gabon as Oslo is to	norway	Norway	0.18	1	1	{'Norway': 0.18, 'which': 0.17, '?': 0.16, 'what': 0.11, '______': 0.1}	0	0.181641	0	1	key	key|target	0.84	TRUE	TRUE	TRUE	target	{'norway': 0.84}
Factual Knowledge	capital_world	Cyprus is to Nicosia as Japan is to	tokyo	Tokyo	0.18	1	1	{'Tokyo': 0.18, 'what': 0.08, '?': 0.07, '': 0.04}	0	0.177734	0	1	key	key|target	0.84	TRUE	TRUE	TRUE	target	{'tokyo': 0.84}
Factual Knowledge	capital_world	Guyana is to Georgetown as Portugal is to	lisbon	______	0.17	0	1	{'______': 0.17, 'Lisbon': 0.11, '__': 0.1, ':': 0.05}	1	0.109863	0.0600586	0.99999	key	key|target	0.84	TRUE	TRUE	TRUE	target	{'lisbon': 0.84}
Factual Knowledge	capital_world	Malawi is to Lilongwe as Norway is to	oslo	?	0.11	0	1	{'?': 0.09, '______': 0.08, 'what': 0.07, 'Oslo': 0.04}	4	0.0419922	0.0717773	0.99996	key	key|target	0.84	TRUE	TRUE	TRUE	target	{'oslo': 0.84}
Factual Knowledge	capital_world	Burundi is to Bujumbura as Syria is to	damascus	Damascus	0.11	1	1	{'Damascus': 0.11, '______': 0.11, '__': 0.11, 'what': 0.05, '': 0.05}	0	0.114258	0	1	key	key|target	0.84	TRUE	TRUE	TRUE	target	{'damascus': 0.84}
Factual Knowledge	capital_world	Skopje is to Macedonia as Thimphu is to	bhutan	Bh	0.84	0.5	0.5	{'Bh': 0.84, '__': 0.02, '______': 0.02, '___': 0.01, 'what': 0.01}	0	0.84375	0	1	key	key|target	0.84	TRUE	TRUE	TRUE	target	{'bhutan': 0.84}
Factual Knowledge	capital_world	Baku is to Azerbaijan as Gaborone is to	botswana	Bot	0.79	0.5	0.5	{'Bot': 0.79, '______': 0.03, '__': 0.02, 'what': 0.01, '_____': 0.01}	0	0.789062	0	1	key	key|target	0.84	TRUE	TRUE	TRUE	target	{'botswana': 0.84}
Factual Knowledge	name_occupation	dante is to poet as euler is to	mathematician	mathematic	0.75	0.5	0.5	{'mathematic': 0.75, 'math': 0.04, 'scientist': 0.01, 'mathematics': 0.01, '______': 0.01}	0	0.746094	0	1	key	key|target	0.84	TRUE	TRUE	TRUE	target	{'mathematician': 0.84}
Factual Knowledge	capital_world	Stockholm is to Sweden as Asmara is to	eritrea	E	0.62	0.5	0.5	{'E': 0.62, 'Ethiopia': 0.04, 'what': 0.04, '______': 0.04, '__': 0.03}	31	0.00174713	0.623253	0.999691	key	key|target	0.84	TRUE	TRUE	TRUE	target	{'eritrea': 0.84}
Factual Knowledge	capital_world	Germany is to Berlin as Sudan is to	khartoum	Kh	0.46	0.5	0.5	{'Kh': 0.46, '______': 0.07, '__': 0.05, '_____': 0.04, 'what': 0.03}	0	0.462891	0	1	key	key|target	0.84	TRUE	TRUE	TRUE	target	{'khartoum': 0.84}
Factual Knowledge	capital_world	Quito is to Ecuador as Asmara is to	eritrea	E	0.35	0.5	0.5	{'E': 0.35, 'what': 0.2, '?': 0.04, '__': 0.03, 'which': 0.03}	12	0.0107422	0.334961	0.99988	key	key|target	0.84	TRUE	TRUE	TRUE	target	{'eritrea': 0.84}
Factual Knowledge	capital_world	Mali is to Bamako as Vietnam is to	hanoi	?	0.28	0	0.5	{'?': 0.12, ':': 0.1, 'H': 0.06, 'what': 0.04}	57	0.000797272	0.274593	0.999432	key	key|target	0.84	TRUE	TRUE	TRUE	target	{'hanoi': 0.84}
Factual Knowledge	capital_world	Armenia is to Yerevan as Jordan is to	amman	Am	0.2	0.5	0.5	{'Am': 0.2, '__': 0.12, '______': 0.08, 'A': 0.03, ':': 0.03}	0	0.195312	0	1	key	key|target	0.84	TRUE	TRUE	TRUE	target	{'amman': 0.84}
Factual Knowledge	capital_world	Uzbekistan is to Tashkent as Namibia is to	windhoek	Wind	0.16	0.5	0.5	{'Wind': 0.16, '__': 0.1, '?': 0.06, '______': 0.04, '': 0.04}	0	0.160156	0	1	key	key|target	0.84	TRUE	TRUE	TRUE	target	{'windhoek': 0.84}
Factual Knowledge	capital_world	Indonesia is to Jakarta as Montenegro is to	podgorica	Pod	0.12	0.5	0.5	{'Pod': 0.12, '?': 0.1, '__': 0.09, 'what': 0.07, 'Bel': 0.03}	0	0.124512	0	1	key	key|target	0.84	TRUE	TRUE	TRUE	target	{'podgorica': 0.84}
Factual Knowledge	capital_world	Honduras is to Tegucigalpa as Turkmenistan is to	ashgabat	Ash	0.12	0.5	0.5	{'Ash': 0.12, '?': 0.06, 'what': 0.05, '__': 0.04, ':': 0.04}	0	0.122559	0	1	key	key|target	0.84	TRUE	TRUE	TRUE	target	{'ashgabat': 0.84}
Factual Knowledge	capital_world	Malta is to Valletta as Jordan is to	amman	Am	0.11	0.5	0.5	{'Am': 0.11, '__': 0.08, '': 0.06, '?': 0.05, '"': 0.05}	0	0.106445	0	1	key	key|target	0.84	TRUE	TRUE	TRUE	target	{'amman': 0.84}
Factual Knowledge	capital_world	Cyprus is to Nicosia as Macedonia is to	skopje	?	0.1	0	0.5	{'?': 0.06, 'what': 0.09, 'Sk': 0.08, '': 0.08}	3	0.0751953	0.0273438	0.99997	key	key|target	0.84	TRUE	TRUE	TRUE	target	{'skopje': 0.84}
Factual Knowledge	name_occupation	mencius is to philosopher as strauss is to	composer	philosopher	0.09	0	0	{'philosopher': 0.09, 'political': 0.07, 'politician': 0.03, 'what': 0.02, '...': 0.02}	240	0.000495911	0.0859299	0.997608	key	key|target	0.84	TRUE	TRUE	TRUE	target	{'composer': 0.84}
Factual Knowledge	country_capital	Jakarta is to Indonesia as Madrid is to	spain	Spain	0.96	1	1	{'Spain': 0.96, 'what': 0.01, '______': 0.0, '': 0.0, '__': 0.0}	0	0.957031	0	1	key	key|target	0.83	TRUE	TRUE	TRUE	target	{'spain': 0.83}
Factual Knowledge	capital_world	Roseau is to Dominica as Vienna is to	austria	Austria	0.96	1	1	{'Austria': 0.96, 'the': 0.02, 'Europe': 0.0, 'Vienna': 0.0, 'Sal': 0.0}	0	0.957031	0	1	key	key|target	0.83	TRUE	TRUE	TRUE	target	{'austria': 0.83}
Factual Knowledge	capital_world	Jakarta is to Indonesia as Madrid is to	spain	Spain	0.96	1	1	{'Spain': 0.96, 'what': 0.01, '______': 0.0, '': 0.0, '__': 0.0}	0	0.957031	0	1	key	key|target	0.83	TRUE	TRUE	TRUE	target	{'spain': 0.83}
Factual Knowledge	country_capital	Dublin is to Ireland as Havana is to	cuba	Cuba	0.94	1	1	{'Cuba': 0.94, '______': 0.01, '': 0.0, 'what': 0.0, 'the': 0.0}	0	0.9375	0	1	key	key|target	0.83	TRUE	TRUE	TRUE	target	{'cuba': 0.83}
Factual Knowledge	capital_world	Dublin is to Ireland as Havana is to	cuba	Cuba	0.94	1	1	{'Cuba': 0.94, '______': 0.01, '': 0.0, 'what': 0.0, 'the': 0.0}	0	0.9375	0	1	key	key|target	0.83	TRUE	TRUE	TRUE	target	{'cuba': 0.83}
Factual Knowledge	capital_world	Tbilisi is to Georgia as Athens is to	greece	Greece	0.93	1	1	{'Greece': 0.93, '__': 0.01, 'the': 0.01, '______': 0.01, '': 0.0}	0	0.925781	0	1	key	key|target	0.83	TRUE	TRUE	TRUE	target	{'greece': 0.83}
Factual Knowledge	capital_world	Roseau is to Dominica as Athens is to	greece	Greece	0.93	1	1	{'Greece': 0.93, 'the': 0.02, 'Ancient': 0.01, 'ancient': 0.01, 'Att': 0.01}	0	0.925781	0	1	key	key|target	0.83	TRUE	TRUE	TRUE	target	{'greece': 0.83}
Factual Knowledge	capital_world	Yerevan is to Armenia as Budapest is to	hungary	Hungary	0.93	1	1	{'Hungary': 0.93, '': 0.01, '______': 0.01, '__': 0.0, 'the': 0.0}	0	0.929688	0	1	key	key|target	0.83	TRUE	TRUE	TRUE	target	{'hungary': 0.83}
Factual Knowledge	country_capital	Helsinki is to Finland as Vienna is to	austria	Austria	0.9	1	1	{'Austria': 0.9, '______': 0.01, 'what': 0.01, 'the': 0.01, '__': 0.01}	0	0.902344	0	1	key	key|target	0.83	TRUE	TRUE	TRUE	target	{'austria': 0.83}
Factual Knowledge	capital_world	Kiev is to Ukraine as Mogadishu is to	somalia	Somalia	0.88	1	1	{'Somalia': 0.88, 'Som': 0.02, '': 0.02, '______': 0.01, 'what': 0.01}	0	0.875	0	1	key	key|target	0.83	TRUE	TRUE	TRUE	target	{'somalia': 0.83}
Factual Knowledge	capital_world	Apia is to Samoa as Caracas is to	venezuela	Venezuela	0.88	1	1	{'Venezuela': 0.88, 'Venez': 0.01, 'the': 0.01, '__': 0.01, 'what': 0.01}	0	0.875	0	1	key	key|target	0.83	TRUE	TRUE	TRUE	target	{'venezuela': 0.83}
Factual Knowledge	capital_world	Berlin is to Germany as Kigali is to	rwanda	Rwanda	0.88	1	1	{'Rwanda': 0.88, '': 0.03, 'what': 0.01, '______': 0.01, 'the': 0.01}	0	0.875	0	1	key	key|target	0.83	TRUE	TRUE	TRUE	target	{'rwanda': 0.83}
Factual Knowledge	country_capital	Belgrade is to Serbia as Ottawa is to	canada	Canada	0.86	1	1	{'Canada': 0.86, '__': 0.03, '______': 0.02, '_____': 0.01, '____': 0.01}	0	0.859375	0	1	key	key|target	0.83	TRUE	TRUE	TRUE	target	{'canada': 0.83}
Factual Knowledge	capital_world	Skopje is to Macedonia as Valletta is to	malta	Malta	0.86	1	1	{'Malta': 0.86, 'which': 0.01, '______': 0.01, '__': 0.01, 'what': 0.01}	0	0.863281	0	1	key	key|target	0.83	TRUE	TRUE	TRUE	target	{'malta': 0.83}
Factual Knowledge	capital_world	Antananarivo is to Madagascar as Dublin is to	ireland	Ireland	0.84	1	1	{'Ireland': 0.84, 'the': 0.03, '__': 0.01, '______': 0.01, 'what': 0.01}	0	0.84375	0	1	key	key|target	0.83	TRUE	TRUE	TRUE	target	{'ireland': 0.83}
Factual Knowledge	country_language	Iran is to Persian as Netherlands is to	dutch	Dutch	0.82	1	1	{'Dutch': 0.82, '______': 0.02, 'Holland': 0.02, 'English': 0.01, 'N': 0.01}	0	0.816406	0	1	key	key|target	0.83	TRUE	TRUE	TRUE	target	{'dutch': 0.83}
Factual Knowledge	country_capital	Belgrade is to Serbia as Dublin is to	ireland	Ireland	0.81	1	1	{'Ireland': 0.81, '______': 0.03, 'the': 0.02, '__': 0.02, 'what': 0.01}	0	0.8125	0	1	key	key|target	0.83	TRUE	TRUE	TRUE	target	{'ireland': 0.83}
Factual Knowledge	capital_world	Belgrade is to Serbia as Dublin is to	ireland	Ireland	0.81	1	1	{'Ireland': 0.81, '______': 0.03, 'the': 0.02, '__': 0.02, 'what': 0.01}	0	0.8125	0	1	key	key|target	0.83	TRUE	TRUE	TRUE	target	{'ireland': 0.83}
Factual Knowledge	capital_world	Tirana is to Albania as Tunis is to	tunisia	Tunisia	0.8	1	1	{'Tunisia': 0.8, '__': 0.03, '______': 0.02, 'what': 0.01, '____': 0.01}	0	0.804688	0	1	key	key|target	0.83	TRUE	TRUE	TRUE	target	{'tunisia': 0.83}
Factual Knowledge	name_occupation	andersen is to writer as depp is to	actor	actor	0.76	1	1	{'actor': 0.76, 'director': 0.01, 'what': 0.01, '______': 0.01, '...': 0.01}	0	0.757812	0	1	key	key|target	0.83	TRUE	TRUE	TRUE	target	{'actor': 0.83}
Factual Knowledge	capital_world	Minsk is to Belarus as Montevideo is to	uruguay	Uruguay	0.75	1	1	{'Uruguay': 0.75, 'what': 0.08, 'which': 0.02, '______': 0.01, ':': 0.01}	0	0.75	0	1	key	key|target	0.83	TRUE	TRUE	TRUE	target	{'uruguay': 0.83}
Factual Knowledge	name_occupation	spinoza is to philosopher as truman is to	president	president	0.73	1	1	{'president': 0.73, 'politician': 0.03, 'u': 0.01, 'us': 0.01, 'what': 0.01}	0	0.734375	0	1	key	key|target	0.83	TRUE	TRUE	TRUE	target	{'president': 0.83}
Factual Knowledge	capital_world	Stockholm is to Sweden as Baghdad is to	iraq	Iraq	0.73	1	1	{'Iraq': 0.73, '______': 0.04, '__': 0.03, 'what': 0.02, '_____': 0.01}	0	0.730469	0	1	key	key|target	0.83	TRUE	TRUE	TRUE	target	{'iraq': 0.83}
Factual Knowledge	capital_world	Berlin is to Germany as Harare is to	zimbabwe	Zimbabwe	0.73	1	1	{'Zimbabwe': 0.73, 'what': 0.05, '______': 0.04, '__': 0.02, 'which': 0.01}	0	0.726562	0	1	key	key|target	0.83	TRUE	TRUE	TRUE	target	{'zimbabwe': 0.83}
Factual Knowledge	country_capital	Canada is to Ottawa as Iran is to	tehran	Tehran	0.71	1	1	{'Tehran': 0.71, '__': 0.04, '______': 0.03, '____': 0.01, '___': 0.01}	0	0.707031	0	1	key	key|target	0.83	TRUE	TRUE	TRUE	target	{'tehran': 0.83}
Factual Knowledge	capital_world	Tbilisi is to Georgia as Belmopan is to	belize	Belize	0.71	1	1	{'Belize': 0.71, 'what': 0.06, '______': 0.03, '__': 0.02, 'which': 0.02}	0	0.714844	0	1	key	key|target	0.83	TRUE	TRUE	TRUE	target	{'belize': 0.83}
Factual Knowledge	capital_world	Ottawa is to Canada as Canberra is to	australia	Australia	0.71	1	1	{'Australia': 0.71, '______': 0.05, '__': 0.03, '_____': 0.02, '____': 0.01}	0	0.707031	0	1	key	key|target	0.83	TRUE	TRUE	TRUE	target	{'australia': 0.83}
Factual Knowledge	capital_world	Canada is to Ottawa as Iran is to	tehran	Tehran	0.71	1	1	{'Tehran': 0.71, '__': 0.04, '______': 0.03, '____': 0.01, '___': 0.01}	0	0.707031	0	1	key	key|target	0.83	TRUE	TRUE	TRUE	target	{'tehran': 0.83}
Factual Knowledge	capital_world	Nuuk is to Greenland as Taipei is to	taiwan	Taiwan	0.69	1	1	{'Taiwan': 0.69, 'China': 0.04, '__': 0.04, 'the': 0.03, '______': 0.03}	0	0.6875	0	1	key	key|target	0.83	TRUE	TRUE	TRUE	target	{'taiwan': 0.83}
Factual Knowledge	capital_world	Managua is to Nicaragua as Muscat is to	oman	Oman	0.67	1	1	{'Oman': 0.67, '__': 0.04, 'what': 0.04, '_____': 0.03, '______': 0.03}	0	0.667969	0	1	key	key|target	0.83	TRUE	TRUE	TRUE	target	{'oman': 0.83}
Factual Knowledge	country_language	Switzerland is to German as Taiwan is to	chinese	Chinese	0.66	1	1	{'Chinese': 0.66, 'Mandarin': 0.12, 'China': 0.07, '______': 0.03, '__': 0.01}	0	0.65625	0	1	key	key|target	0.83	TRUE	TRUE	TRUE	target	{'chinese': 0.83}
Factual Knowledge	country_capital	Islamabad is to Pakistan as Tehran is to	iran	Iran	0.66	1	1	{'Iran': 0.66, 'what': 0.05, ':': 0.03, '______': 0.03, 'which': 0.03}	0	0.664062	0	1	key	key|target	0.83	TRUE	TRUE	TRUE	target	{'iran': 0.83}
Factual Knowledge	name_nationality	marx is to German as newton is to	english	English	0.66	1	1	{'English': 0.66, 'physics': 0.08, 'english': 0.05, 'British': 0.05, 'Physics': 0.01}	0	0.660156	0	1	key	key|target	0.83	TRUE	TRUE	TRUE	target	{'english': 0.83}
Factual Knowledge	capital_world	Vientiane is to Laos as Bratislava is to	slovakia	Slovakia	0.66	1	1	{'Slovakia': 0.66, 'the': 0.1, 'what': 0.04, 'Czech': 0.03, 'which': 0.01}	0	0.664062	0	1	key	key|target	0.83	TRUE	TRUE	TRUE	target	{'slovakia': 0.83}
Factual Knowledge	capital_world	Islamabad is to Pakistan as Tehran is to	iran	Iran	0.66	1	1	{'Iran': 0.66, 'what': 0.05, ':': 0.03, '______': 0.03, 'which': 0.03}	0	0.664062	0	1	key	key|target	0.83	TRUE	TRUE	TRUE	target	{'iran': 0.83}
Factual Knowledge	name_nationality	fermi is to Italian as pascal is to	french	French	0.64	1	1	{'French': 0.64, 'french': 0.06, 'metric': 0.03, 'what': 0.03, 'English': 0.02}	0	0.644531	0	1	key	key|target	0.83	TRUE	TRUE	TRUE	target	{'french': 0.83}
Factual Knowledge	country_capital	Ukraine is to Kiev as Spain is to	madrid	Madrid	0.59	1	1	{'Madrid': 0.59, 'Barcelona': 0.09, '______': 0.05, '__': 0.02, ':': 0.02}	0	0.589844	0	1	key	key|target	0.83	TRUE	TRUE	TRUE	target	{'madrid': 0.83}
Factual Knowledge	capital_world	Ukraine is to Kiev as Spain is to	madrid	Madrid	0.59	1	1	{'Madrid': 0.59, 'Barcelona': 0.09, '______': 0.05, '__': 0.02, ':': 0.02}	0	0.589844	0	1	key	key|target	0.83	TRUE	TRUE	TRUE	target	{'madrid': 0.83}
Factual Knowledge	country_capital	Islamabad is to Pakistan as Kingston is to	jamaica	Jamaica	0.56	1	1	{'Jamaica': 0.56, '__': 0.05, '______': 0.04, 'which': 0.03, ':': 0.03}	0	0.5625	0	1	key	key|target	0.83	TRUE	TRUE	TRUE	target	{'jamaica': 0.83}
Factual Knowledge	capital_world	Islamabad is to Pakistan as Kingston is to	jamaica	Jamaica	0.56	1	1	{'Jamaica': 0.56, '__': 0.05, '______': 0.04, 'which': 0.03, ':': 0.03}	0	0.5625	0	1	key	key|target	0.83	TRUE	TRUE	TRUE	target	{'jamaica': 0.83}
Factual Knowledge	capital_world	Paramaribo is to Suriname as Skopje is to	macedonia	what	0.54	0	1	{'what': 0.54, '?': 0.03, 'Macedonia': 0.09, 'which': 0.05}	2	0.090332	0.444824	0.99998	key	key|target	0.83	TRUE	TRUE	TRUE	target	{'macedonia': 0.83}
Factual Knowledge	capital_world	Antananarivo is to Madagascar as Dhaka is to	bangladesh	Bangladesh	0.54	1	1	{'Bangladesh': 0.54, 'what': 0.06, ':': 0.04, '______': 0.03, '__': 0.03}	0	0.535156	0	1	key	key|target	0.83	TRUE	TRUE	TRUE	target	{'bangladesh': 0.83}
Factual Knowledge	name_occupation	mencius is to philosopher as moses is to	prophet	prophet	0.5	1	1	{'prophet': 0.5, 'religion': 0.06, 'religious': 0.05, 'law': 0.02, 'what': 0.02}	0	0.5	0	1	key	key|target	0.83	TRUE	TRUE	TRUE	target	{'prophet': 0.83}
Factual Knowledge	capital_world	Islamabad is to Pakistan as Quito is to	ecuador	Ecuador	0.5	1	1	{'Ecuador': 0.5, 'what': 0.13, '______': 0.08, '__': 0.08, '___': 0.02}	0	0.496094	0	1	key	key|target	0.83	TRUE	TRUE	TRUE	target	{'ecuador': 0.83}
Factual Knowledge	name_occupation	dante is to poet as wagner is to	composer	composer	0.49	1	1	{'composer': 0.49, 'musician': 0.07, '____': 0.02, '_____': 0.02, '': 0.02}	0	0.486328	0	1	key	key|target	0.83	TRUE	TRUE	TRUE	target	{'composer': 0.83}
Factual Knowledge	capital_world	Chisinau is to Moldova as Damascus is to	syria	Syria	0.49	1	1	{'Syria': 0.49, 'what': 0.15, '______': 0.06, '__': 0.05, ':': 0.04}	0	0.490234	0	1	key	key|target	0.83	TRUE	TRUE	TRUE	target	{'syria': 0.83}
Factual Knowledge	capital_world	Tirana is to Albania as Belmopan is to	belize	Belize	0.47	1	1	{'Belize': 0.47, 'what': 0.15, 'which': 0.08, '______': 0.04, ':': 0.03}	0	0.474609	0	1	key	key|target	0.83	TRUE	TRUE	TRUE	target	{'belize': 0.83}
Factual Knowledge	capital_world	Ottawa is to Canada as Amman is to	jordan	Jordan	0.47	1	1	{'Jordan': 0.47, 'what': 0.15, '___': 0.04, '______': 0.03, 'which': 0.03}	0	0.466797	0	1	key	key|target	0.83	TRUE	TRUE	TRUE	target	{'jordan': 0.83}
Factual Knowledge	name_occupation	balzac is to novelist as shakespeare is to	playwright	playwright	0.46	1	1	{'playwright': 0.46, 'poet': 0.05, 'dram': 0.04, 'play': 0.03, '?': 0.02}	0	0.457031	0	1	key	key|target	0.83	TRUE	TRUE	TRUE	target	{'playwright': 0.83}
Factual Knowledge	capital_world	Somalia is to Mogadishu as Japan is to	tokyo	Tokyo	0.45	1	1	{'Tokyo': 0.45, '______': 0.05, '?': 0.04, '__': 0.04, ':': 0.03}	0	0.451172	0	1	key	key|target	0.83	TRUE	TRUE	TRUE	target	{'tokyo': 0.83}
Factual Knowledge	country_language	Guam is to English as Netherlands is to	dutch	Dutch	0.42	1	1	{'Dutch': 0.42, '______': 0.12, '__': 0.03, 'Holland': 0.02, '____': 0.02}	0	0.417969	0	1	key	key|target	0.83	TRUE	TRUE	TRUE	target	{'dutch': 0.83}
Factual Knowledge	capital_world	Ljubljana is to Slovenia as Riga is to	latvia	Latvia	0.42	1	1	{'Latvia': 0.42, 'what': 0.13, 'which': 0.11, '?': 0.04, '______': 0.03}	0	0.421875	0	1	key	key|target	0.83	TRUE	TRUE	TRUE	target	{'latvia': 0.83}
Factual Knowledge	name_nationality	hegel is to German as napoleon is to	french	French	0.41	1	1	{'French': 0.41, 'french': 0.11, 'France': 0.06, 'English': 0.06, 'the': 0.02}	0	0.410156	0	1	key	key|target	0.83	TRUE	TRUE	TRUE	target	{'french': 0.83}
Factual Knowledge	capital_world	Thimphu is to Bhutan as Abuja is to	nigeria	Nigeria	0.41	1	1	{'Nigeria': 0.41, '______': 0.13, '__': 0.08, '____': 0.03, '_____': 0.03}	0	0.410156	0	1	key	key|target	0.83	TRUE	TRUE	TRUE	target	{'nigeria': 0.83}
Factual Knowledge	capital_world	Conakry is to Guinea as Kigali is to	rwanda	Rwanda	0.41	1	1	{'Rwanda': 0.41, '__': 0.06, 'Bur': 0.05, ':': 0.04, '______': 0.03}	0	0.408203	0	1	key	key|target	0.83	TRUE	TRUE	TRUE	target	{'rwanda': 0.83}
Factual Knowledge	country_capital	Iraq is to Baghdad as Italy is to	rome	Rome	0.4	1	1	{'Rome': 0.4, '__': 0.05, ':': 0.04, '______': 0.04, '': 0.03}	0	0.400391	0	1	key	key|target	0.83	TRUE	TRUE	TRUE	target	{'rome': 0.83}
Factual Knowledge	capital_world	Liberia is to Monrovia as Iran is to	tehran	Tehran	0.4	1	1	{'Tehran': 0.4, '______': 0.08, '__': 0.07, '___': 0.04, '____': 0.03}	0	0.398438	0	1	key	key|target	0.83	TRUE	TRUE	TRUE	target	{'tehran': 0.83}
Factual Knowledge	capital_world	Iraq is to Baghdad as Italy is to	rome	Rome	0.4	1	1	{'Rome': 0.4, '__': 0.05, ':': 0.04, '______': 0.04, '': 0.03}	0	0.400391	0	1	key	key|target	0.83	TRUE	TRUE	TRUE	target	{'rome': 0.83}
Factual Knowledge	country_capital	Canberra is to Australia as Tehran is to	iran	Iran	0.39	1	1	{'Iran': 0.39, 'what': 0.12, ':': 0.04, 'which': 0.03, '___': 0.03}	0	0.392578	0	1	key	key|target	0.83	TRUE	TRUE	TRUE	target	{'iran': 0.83}
Factual Knowledge	capital_world	Canberra is to Australia as Tehran is to	iran	Iran	0.39	1	1	{'Iran': 0.39, 'what': 0.12, ':': 0.04, 'which': 0.03, '___': 0.03}	0	0.392578	0	1	key	key|target	0.83	TRUE	TRUE	TRUE	target	{'iran': 0.83}
Factual Knowledge	country_capital	Paris is to France as Taipei is to	taiwan	Taiwan	0.38	1	1	{'Taiwan': 0.38, '______': 0.07, '__': 0.05, '_____': 0.04, '____': 0.03}	0	0.382812	0	1	key	key|target	0.83	TRUE	TRUE	TRUE	target	{'taiwan': 0.83}
Factual Knowledge	name_occupation	kepler is to mathematician as pacino is to	actor	actor	0.38	1	1	{'actor': 0.38, '?': 0.03, '': 0.04, 'what': 0.03}	0	0.375	0	1	key	key|target	0.83	TRUE	TRUE	TRUE	target	{'actor': 0.83}
Factual Knowledge	capital_world	Paris is to France as Taipei is to	taiwan	Taiwan	0.38	1	1	{'Taiwan': 0.38, '______': 0.07, '__': 0.05, '_____': 0.04, '____': 0.03}	0	0.382812	0	1	key	key|target	0.83	TRUE	TRUE	TRUE	target	{'taiwan': 0.83}
Factual Knowledge	name_occupation	mencius is to philosopher as schwarzenegger is to	actor	actor	0.36	1	1	{'actor': 0.36, 'governor': 0.18, 'body': 0.06, 'politician': 0.05, 'terminator': 0.02}	0	0.363281	0	1	key	key|target	0.83	TRUE	TRUE	TRUE	target	{'actor': 0.83}
Factual Knowledge	name_occupation	pascal is to mathematician as tolstoi is to	novelist	novelist	0.36	1	1	{'novelist': 0.36, 'writer': 0.14, 'russian': 0.05, 'what': 0.03, 'author': 0.02}	0	0.357422	0	1	key	key|target	0.83	TRUE	TRUE	TRUE	target	{'novelist': 0.83}
Factual Knowledge	name_occupation	andersen is to writer as hawking is to	physicist	physicist	0.35	1	1	{'physicist': 0.35, 'scientist': 0.2, 'physics': 0.04, 'ast': 0.02, 'science': 0.02}	0	0.351562	0	1	key	key|target	0.83	TRUE	TRUE	TRUE	target	{'physicist': 0.83}
Factual Knowledge	capital_world	London is to England as Monrovia is to	liberia	Liberia	0.35	1	1	{'Liberia': 0.35, '__': 0.07, '______': 0.06, 'what': 0.06, '____': 0.05}	0	0.345703	0	1	key	key|target	0.83	TRUE	TRUE	TRUE	target	{'liberia': 0.83}
Factual Knowledge	capital_world	Paris is to France as Tirana is to	albania	Albania	0.35	1	1	{'Albania': 0.35, 'what': 0.12, '______': 0.06, '__': 0.05, 'which': 0.04}	0	0.345703	0	1	key	key|target	0.83	TRUE	TRUE	TRUE	target	{'albania': 0.83}
Factual Knowledge	country_language	Jamaica is to English as Netherlands is to	dutch	Dutch	0.32	1	1	{'Dutch': 0.32, '______': 0.07, ':': 0.04, '': 0.04, '?': 0.04}	0	0.316406	0	1	key	key|target	0.83	TRUE	TRUE	TRUE	target	{'dutch': 0.83}
Factual Knowledge	name_occupation	hume is to philosopher as tolstoi is to	novelist	novelist	0.31	1	1	{'novelist': 0.31, 'writer': 0.14, 'author': 0.06, '': 0.05, '?': 0.03}	0	0.306641	0	1	key	key|target	0.83	TRUE	TRUE	TRUE	target	{'novelist': 0.83}
Factual Knowledge	country_capital	Indonesia is to Jakarta as Spain is to	madrid	Madrid	0.28	1	1	{'Madrid': 0.28, 'Barcelona': 0.09, '______': 0.06, ':': 0.06, '?': 0.05}	0	0.275391	0	1	key	key|target	0.83	TRUE	TRUE	TRUE	target	{'madrid': 0.83}
Factual Knowledge	capital_world	Indonesia is to Jakarta as Spain is to	madrid	Madrid	0.28	1	1	{'Madrid': 0.28, 'Barcelona': 0.09, '______': 0.06, ':': 0.06, '?': 0.05}	0	0.275391	0	1	key	key|target	0.83	TRUE	TRUE	TRUE	target	{'madrid': 0.83}
Factual Knowledge	capital_world	Azerbaijan is to Baku as China is to	beijing	Beijing	0.28	1	1	{'Beijing': 0.28, '______': 0.08, ':': 0.05, '___': 0.04, 'Shanghai': 0.03}	0	0.277344	0	1	key	key|target	0.83	TRUE	TRUE	TRUE	target	{'beijing': 0.83}
Factual Knowledge	country_capital	Chile is to Santiago as Poland is to	warsaw	Warsaw	0.27	1	1	{'Warsaw': 0.27, '______': 0.11, '_____': 0.05, '____': 0.05, '__': 0.05}	0	0.267578	0	1	key	key|target	0.83	TRUE	TRUE	TRUE	target	{'warsaw': 0.83}
Factual Knowledge	name_nationality	lenin is to Soviet as plato is to	greek	Greek	0.27	1	1	{'Greek': 0.27, 'g': 0.11, 'Greece': 0.07, 'western': 0.03, 'S': 0.03}	0	0.269531	0	1	key	key|target	0.83	TRUE	TRUE	TRUE	target	{'greek': 0.83}
Factual Knowledge	capital_world	Chile is to Santiago as Poland is to	warsaw	Warsaw	0.27	1	1	{'Warsaw': 0.27, '______': 0.11, '_____': 0.05, '____': 0.05, '__': 0.05}	0	0.267578	0	1	key	key|target	0.83	TRUE	TRUE	TRUE	target	{'warsaw': 0.83}
Factual Knowledge	name_occupation	hume is to philosopher as napoleon is to	emperor	emperor	0.24	1	1	{'emperor': 0.24, 'general': 0.15, 'dictator': 0.04, 'conquer': 0.04, 'military': 0.03}	0	0.237305	0	1	key	key|target	0.83	TRUE	TRUE	TRUE	target	{'emperor': 0.83}
Factual Knowledge	capital_world	Mozambique is to Maputo as Sweden is to	stockholm	Stockholm	0.24	1	1	{'Stockholm': 0.24, '______': 0.06, ':': 0.03, '': 0.03}	0	0.237305	0	1	key	key|target	0.83	TRUE	TRUE	TRUE	target	{'stockholm': 0.83}
Factual Knowledge	capital_world	Dushanbe is to Tajikistan as Lima is to	peru	what	0.22	0	1	{'what': 0.22, 'Peru': 0.17, ':': 0.08, '?': 0.08, 'which': 0.05}	1	0.168945	0.0488281	0.99999	key	key|target	0.83	TRUE	TRUE	TRUE	target	{'peru': 0.83}
Factual Knowledge	country_capital	Afghanistan is to Kabul as Poland is to	warsaw	Warsaw	0.21	1	1	{'Warsaw': 0.21, '______': 0.09, '_____': 0.06, '__': 0.05, '____': 0.05}	0	0.211914	0	1	key	key|target	0.83	TRUE	TRUE	TRUE	target	{'warsaw': 0.83}
Factual Knowledge	capital_world	France is to Paris as Cuba is to	havana	Havana	0.18	1	1	{'Havana': 0.18, '______': 0.12, '__': 0.07, '_____': 0.05, ':': 0.05}	0	0.177734	0	1	key	key|target	0.83	TRUE	TRUE	TRUE	target	{'havana': 0.83}
Factual Knowledge	name_occupation	aristotle is to philosopher as pacino is to	actor	actor	0.16	1	1	{'actor': 0.16, '': 0.04, '?': 0.05, 'what': 0.04}	0	0.157227	0	1	key	key|target	0.83	TRUE	TRUE	TRUE	target	{'actor': 0.83}
Factual Knowledge	name_occupation	columbus is to explorer as hitler is to	dictator	dictator	0.16	1	1	{'dictator': 0.16, 'leader': 0.04, 'what': 0.04, 'ruler': 0.03, '______': 0.03}	0	0.155273	0	1	key	key|target	0.83	TRUE	TRUE	TRUE	target	{'dictator': 0.83}
Factual Knowledge	capital_world	Samoa is to Apia as Cuba is to	havana	Havana	0.16	1	1	{'Havana': 0.16, ':': 0.12, '______': 0.06, '__': 0.05, '_____': 0.04}	0	0.162109	0	1	key	key|target	0.83	TRUE	TRUE	TRUE	target	{'havana': 0.83}
Factual Knowledge	capital_world	Stockholm is to Sweden as Tallinn is to	estonia	what	0.14	0	1	{'what': 0.14, 'which': 0.13, 'Estonia': 0.11, ':': 0.07, '?': 0.06}	2	0.106934	0.0297852	0.99998	key	key|target	0.83	TRUE	TRUE	TRUE	target	{'estonia': 0.83}
Factual Knowledge	country_capital	Iraq is to Baghdad as Egypt is to	cairo	:	0.13	0	1	{':': 0.09, 'Cairo': 0.1, '______': 0.06, '?': 0.05}	1	0.104492	0.0292969	0.99999	key	key|target	0.83	TRUE	TRUE	TRUE	target	{'cairo': 0.83}
Factual Knowledge	capital_world	Iraq is to Baghdad as Egypt is to	cairo	:	0.13	0	1	{':': 0.09, 'Cairo': 0.1, '______': 0.06, '?': 0.05}	1	0.104492	0.0292969	0.99999	key	key|target	0.83	TRUE	TRUE	TRUE	target	{'cairo': 0.83}
Factual Knowledge	country_capital	Indonesia is to Jakarta as Sweden is to	stockholm	______	0.1	0	1	{'______': 0.1, 'Stockholm': 0.09, ':': 0.05, '?': 0.05}	1	0.090332	0.00585938	0.99999	key	key|target	0.83	TRUE	TRUE	TRUE	target	{'stockholm': 0.83}
Factual Knowledge	capital_world	Cyprus is to Nicosia as Poland is to	warsaw	Warsaw	0.1	1	1	{'Warsaw': 0.1, '?': 0.08, '': 0.07, '______': 0.06, 'what': 0.05}	0	0.0952148	0	1	key	key|target	0.83	TRUE	TRUE	TRUE	target	{'warsaw': 0.83}
Factual Knowledge	name_occupation	andersen is to writer as hitler is to	dictator	politician	0.08	0	1	{'politician': 0.08, 'leader': 0.06, 'jew': 0.05, 'dictator': 0.04, 'painter': 0.04}	4	0.0427246	0.0368652	0.99996	key	key|target	0.83	TRUE	TRUE	TRUE	target	{'dictator': 0.83}
Factual Knowledge	capital_world	Suva is to Fiji as Thimphu is to	bhutan	Bh	0.91	0.5	0.5	{'Bh': 0.91, '______': 0.01, '__': 0.01, '': 0.01, 'what': 0.01}	0	0.910156	0	1	key	key|target	0.83	TRUE	TRUE	TRUE	target	{'bhutan': 0.83}
Factual Knowledge	UK_city_county	lancaster is to lancashire as wells is to	somerset	som	0.86	0.5	0.5	{'som': 0.86, 'corn': 0.02, 'wilt': 0.01, 'what': 0.01, 'dor': 0.0}	64	0.00031662	0.859058	0.999362	key	key|target	0.83	TRUE	TRUE	TRUE	target	{'somerset': 0.83}
Factual Knowledge	capital_world	Apia is to Samoa as Chisinau is to	moldova	Mold	0.74	0.5	0.5	{'Mold': 0.74, 'what': 0.03, '?': 0.02, 'which': 0.02, 'the': 0.02}	0	0.738281	0	1	key	key|target	0.83	TRUE	TRUE	TRUE	target	{'moldova': 0.83}
Factual Knowledge	name_occupation	aristotle is to philosopher as euler is to	mathematician	mathematic	0.52	0.5	0.5	{'mathematic': 0.52, 'what': 0.02, 'math': 0.02, '?': 0.02, '': 0.02}	0	0.515625	0	1	key	key|target	0.83	TRUE	TRUE	TRUE	target	{'mathematician': 0.83}
Factual Knowledge	capital_world	Vientiane is to Laos as Bishkek is to	kyrgyzstan	Ky	0.49	0.5	0.5	{'Ky': 0.49, 'what': 0.12, 'which': 0.09, '?': 0.04, 'the': 0.02}	0	0.490234	0	1	key	key|target	0.83	TRUE	TRUE	TRUE	target	{'kyrgyzstan': 0.83}
Factual Knowledge	capital_world	Baku is to Azerbaijan as Dushanbe is to	tajikistan	Taj	0.46	0.5	0.5	{'Taj': 0.46, 'what': 0.05, '?': 0.04, 'which': 0.04, '__': 0.03}	0	0.458984	0	1	key	key|target	0.83	TRUE	TRUE	TRUE	target	{'tajikistan': 0.83}
Factual Knowledge	UK_city_county	cardiff is to glamorgan as liverpool is to	lancashire	mer	0.42	0	0.5	{'mer': 0.42, 'lanc': 0.25, 'which': 0.02, '-': 0.02, '': 0.02}	1	0.251953	0.164062	0.99999	key	key|target	0.83	TRUE	TRUE	TRUE	target	{'lancashire': 0.83}
Factual Knowledge	capital_world	Nepal is to Kathmandu as Somalia is to	mogadishu	Mog	0.39	0.5	0.5	{'Mog': 0.39, '______': 0.08, '__': 0.06, '_____': 0.02, '"': 0.02}	0	0.388672	0	1	key	key|target	0.83	TRUE	TRUE	TRUE	target	{'mogadishu': 0.83}
Factual Knowledge	capital_world	Canada is to Ottawa as Montenegro is to	podgorica	Pod	0.39	0.5	0.5	{'Pod': 0.39, '__': 0.07, '?"': 0.03, '?': 0.03, '______': 0.03}	0	0.392578	0	1	key	key|target	0.83	TRUE	TRUE	TRUE	target	{'podgorica': 0.83}
Factual Knowledge	UK_city_county	hull is to yorkshire as oxford is to	oxfordshire	cam	0.37	0	0.5	{'cam': 0.37, 'o': 0.04, 'eng': 0.03, 'the': 0.03, 'som': 0.02}	13	0.00817871	0.360962	0.99987	key	key|target	0.83	TRUE	TRUE	TRUE	target	{'oxfordshire': 0.83}
Factual Knowledge	capital_world	Kyrgyzstan is to Bishkek as Zimbabwe is to	harare	Har	0.36	0.5	0.5	{'Har': 0.36, '______': 0.07, ':': 0.07, '': 0.04, '__': 0.04}	0	0.355469	0	1	key	key|target	0.83	TRUE	TRUE	TRUE	target	{'harare': 0.83}
Factual Knowledge	capital_world	Uzbekistan is to Tashkent as Lithuania is to	vilnius	Vil	0.31	0.5	0.5	{'Vil': 0.31, 'what': 0.06, '': 0.04, '__': 0.03, '?': 0.03}	0	0.308594	0	1	key	key|target	0.83	TRUE	TRUE	TRUE	target	{'vilnius': 0.83}
Factual Knowledge	name_occupation	edison is to inventor as euler is to	mathematician	mathematic	0.27	0.5	0.5	{'mathematic': 0.27, '_': 0.03, '__': 0.03, '___': 0.02, 'math': 0.02}	0	0.273438	0	1	key	key|target	0.83	TRUE	TRUE	TRUE	target	{'mathematician': 0.83}
Factual Knowledge	capital_world	Madagascar is to Antananarivo as Turkmenistan is to	ashgabat	Ash	0.2	0.5	0.5	{'Ash': 0.2, ':': 0.06, '__': 0.06, '____': 0.05}	0	0.198242	0	1	key	key|target	0.83	TRUE	TRUE	TRUE	target	{'ashgabat': 0.83}
Factual Knowledge	capital_world	Slovenia is to Ljubljana as Zambia is to	lusaka	?	0.15	0	0.5	{'?': 0.09, 'what': 0.1, 'L': 0.07, '_': 0.05}	154	0.000177383	0.150213	0.998465	key	key|target	0.83	TRUE	TRUE	TRUE	target	{'lusaka': 0.83}
Factual Knowledge	capital_world	Nepal is to Kathmandu as Nicaragua is to	managua	Man	0.14	0.5	0.5	{'Man': 0.14, '______': 0.12, '__': 0.08, '_____': 0.05, '____': 0.05}	0	0.142578	0	1	key	key|target	0.83	TRUE	TRUE	TRUE	target	{'managua': 0.83}
Factual Knowledge	capital_world	Brussels is to Belgium as Georgetown is to	guyana	Washington	0.43	0	0	{'Washington': 0.43, 'the': 0.23, 'D': 0.09, 'DC': 0.06, 'Virginia': 0.02}	31	0.00111389	0.42662	0.999691	key	key|target	0.83	TRUE	TRUE	TRUE	target	{'guyana': 0.83}
Factual Knowledge	capital_world	Doha is to Qatar as Nassau is to	bahamas	the	0.32	0	0	{'the': 0.32, 'The': 0.13, ':': 0.08, '__': 0.06, '___': 0.04}	7	0.0224609	0.297852	0.99993	key	key|target	0.83	TRUE	TRUE	TRUE	target	{'bahamas': 0.83}
Factual Knowledge	capital_world	Ukraine is to Kiev as Morocco is to	rabat	:	0.08	0	0	{':': 0.03, '__': 0.05, '______': 0.04, 'what': 0.03}	12	0.0281982	0.0484619	0.99988	key	key|target	0.83	TRUE	TRUE	TRUE	target	{'rabat': 0.83}
Factual Knowledge	capital_world	Bulgaria is to Sofia as Tunisia is to	tunis	__	0.07	0	0	{'__': 0.07, '?': 0.05, '': 0.05, 'what': 0.05, ':': 0.04}	5	0.0395508	0.0297852	0.99995	key	key|target	0.83	TRUE	TRUE	TRUE	target	{'tunis': 0.83}
Factual Knowledge	capital_world	Apia is to Samoa as Dublin is to	ireland	Ireland	0.96	1	1	{'Ireland': 0.96, 'the': 0.02, 'E': 0.01, '': 0.0}	0	0.957031	0	1	key	key|target	0.82	TRUE	TRUE	TRUE	target	{'ireland': 0.82}
Factual Knowledge	country_capital	Jakarta is to Indonesia as Oslo is to	norway	Norway	0.94	1	1	{'Norway': 0.94, 'Scandin': 0.02, 'Sweden': 0.0, 'which': 0.0, 'the': 0.0}	0	0.941406	0	1	key	key|target	0.82	TRUE	TRUE	TRUE	target	{'norway': 0.82}
Factual Knowledge	capital_world	Jakarta is to Indonesia as Oslo is to	norway	Norway	0.94	1	1	{'Norway': 0.94, 'Scandin': 0.02, 'Sweden': 0.0, 'which': 0.0, 'the': 0.0}	0	0.941406	0	1	key	key|target	0.82	TRUE	TRUE	TRUE	target	{'norway': 0.82}
Factual Knowledge	country_capital	Bangkok is to Thailand as Havana is to	cuba	Cuba	0.92	1	1	{'Cuba': 0.92, '______': 0.01, '': 0.01, '_____': 0.0, 'what': 0.0}	0	0.921875	0	1	key	key|target	0.82	TRUE	TRUE	TRUE	target	{'cuba': 0.82}
Factual Knowledge	capital_world	Bangkok is to Thailand as Havana is to	cuba	Cuba	0.92	1	1	{'Cuba': 0.92, '______': 0.01, '': 0.01, '_____': 0.0, 'what': 0.0}	0	0.921875	0	1	key	key|target	0.82	TRUE	TRUE	TRUE	target	{'cuba': 0.82}
Factual Knowledge	capital_world	Kathmandu is to Nepal as Ottawa is to	canada	Canada	0.91	1	1	{'Canada': 0.91, '__': 0.02, '______': 0.02, '_____': 0.0, 'what': 0.0}	0	0.90625	0	1	key	key|target	0.82	TRUE	TRUE	TRUE	target	{'canada': 0.82}
Factual Knowledge	country_capital	Kiev is to Ukraine as Kingston is to	jamaica	Jamaica	0.89	1	1	{'Jamaica': 0.89, '__': 0.01, '______': 0.01, 'Canada': 0.01, 'what': 0.01}	0	0.894531	0	1	key	key|target	0.82	TRUE	TRUE	TRUE	target	{'jamaica': 0.82}
Factual Knowledge	capital_world	Kiev is to Ukraine as Kingston is to	jamaica	Jamaica	0.89	1	1	{'Jamaica': 0.89, '__': 0.01, '______': 0.01, 'Canada': 0.01, 'what': 0.01}	0	0.894531	0	1	key	key|target	0.82	TRUE	TRUE	TRUE	target	{'jamaica': 0.82}
Factual Knowledge	capital_world	Apia is to Samoa as Dhaka is to	bangladesh	Bangladesh	0.86	1	1	{'Bangladesh': 0.86, '______': 0.01, 'what': 0.01, '__': 0.01, '': 0.01}	0	0.863281	0	1	key	key|target	0.82	TRUE	TRUE	TRUE	target	{'bangladesh': 0.82}
Factual Knowledge	capital_world	Accra is to Ghana as Bern is to	switzerland	Switzerland	0.86	1	1	{'Switzerland': 0.86, 'what': 0.01, 'which': 0.01, '______': 0.01, '__': 0.01}	0	0.859375	0	1	key	key|target	0.82	TRUE	TRUE	TRUE	target	{'switzerland': 0.82}
Factual Knowledge	capital_world	Jakarta is to Indonesia as Lusaka is to	zambia	Zambia	0.83	1	1	{'Zambia': 0.83, 'what': 0.04, 'which': 0.01, '?': 0.01, '__': 0.01}	0	0.828125	0	1	key	key|target	0.82	TRUE	TRUE	TRUE	target	{'zambia': 0.82}
Factual Knowledge	capital_world	Jakarta is to Indonesia as Ljubljana is to	slovenia	Slovenia	0.8	1	1	{'Slovenia': 0.8, 'what': 0.04, 'which': 0.02, '__': 0.02, '______': 0.01}	0	0.800781	0	1	key	key|target	0.82	TRUE	TRUE	TRUE	target	{'slovenia': 0.82}
Factual Knowledge	capital_world	Accra is to Ghana as Amman is to	jordan	Jordan	0.79	1	1	{'Jordan': 0.79, '__': 0.04, '______': 0.02, 'what': 0.02, '___': 0.02}	0	0.789062	0	1	key	key|target	0.82	TRUE	TRUE	TRUE	target	{'jordan': 0.82}
Factual Knowledge	capital_world	Caracas is to Venezuela as Manila is to	philippines	the	0.79	0	1	{'the': 0.79, 'Philippines': 0.05, '______': 0.03, '__': 0.02, 'The': 0.02}	1	0.045166	0.743896	0.99999	key	key|target	0.82	TRUE	TRUE	TRUE	target	{'philippines': 0.82}
Factual Knowledge	capital_world	Kiev is to Ukraine as Nassau is to	bahamas	the	0.77	0	1	{'the': 0.77, 'The': 0.14, 'Bahamas': 0.02, 'New': 0.01, 'what': 0.0}	2	0.0198975	0.75354	0.99998	key	key|target	0.82	TRUE	TRUE	TRUE	target	{'bahamas': 0.82}
Factual Knowledge	capital_world	Georgetown is to Guyana as Muscat is to	oman	Oman	0.77	1	1	{'Oman': 0.77, '______': 0.02, '__': 0.02, '_____': 0.02, '': 0.02}	0	0.765625	0	1	key	key|target	0.82	TRUE	TRUE	TRUE	target	{'oman': 0.82}
Factual Knowledge	country_capital	Beirut is to Lebanon as Dhaka is to	bangladesh	Bangladesh	0.76	1	1	{'Bangladesh': 0.76, '______': 0.04, 'what': 0.02, '__': 0.02, '_____': 0.01}	0	0.761719	0	1	key	key|target	0.82	TRUE	TRUE	TRUE	target	{'bangladesh': 0.82}
Factual Knowledge	capital_world	Beirut is to Lebanon as Dhaka is to	bangladesh	Bangladesh	0.76	1	1	{'Bangladesh': 0.76, '______': 0.04, 'what': 0.02, '__': 0.02, '_____': 0.01}	0	0.761719	0	1	key	key|target	0.82	TRUE	TRUE	TRUE	target	{'bangladesh': 0.82}
Factual Knowledge	capital_world	Moscow is to Russia as Nassau is to	bahamas	the	0.68	0	1	{'the': 0.68, 'The': 0.12, 'Bahamas': 0.03, '__': 0.01, '______': 0.01}	2	0.0310059	0.652588	0.99998	key	key|target	0.82	TRUE	TRUE	TRUE	target	{'bahamas': 0.82}
Factual Knowledge	country_capital	Belgrade is to Serbia as Hanoi is to	vietnam	Vietnam	0.65	1	1	{'Vietnam': 0.65, '______': 0.06, 'Viet': 0.05, '__': 0.03, 'what': 0.02}	0	0.652344	0	1	key	key|target	0.82	TRUE	TRUE	TRUE	target	{'vietnam': 0.82}
Factual Knowledge	capital_world	Belgrade is to Serbia as Hanoi is to	vietnam	Vietnam	0.65	1	1	{'Vietnam': 0.65, '______': 0.06, 'Viet': 0.05, '__': 0.03, 'what': 0.02}	0	0.652344	0	1	key	key|target	0.82	TRUE	TRUE	TRUE	target	{'vietnam': 0.82}
Factual Knowledge	capital_world	Minsk is to Belarus as Nicosia is to	cyprus	Cyprus	0.64	1	1	{'Cyprus': 0.64, 'which': 0.08, 'what': 0.05, '__': 0.04, '______': 0.02}	0	0.636719	0	1	key	key|target	0.82	TRUE	TRUE	TRUE	target	{'cyprus': 0.82}
Factual Knowledge	capital_world	Apia is to Samoa as Belmopan is to	belize	Belize	0.62	1	1	{'Belize': 0.62, 'what': 0.09, 'which': 0.05, '?': 0.02, ':': 0.02}	0	0.625	0	1	key	key|target	0.82	TRUE	TRUE	TRUE	target	{'belize': 0.82}
Factual Knowledge	capital_world	Pakistan is to Islamabad as Finland is to	helsinki	Helsinki	0.61	1	1	{'Helsinki': 0.61, ':': 0.03, '______': 0.03}	0	0.609375	0	1	key	key|target	0.82	TRUE	TRUE	TRUE	target	{'helsinki': 0.82}
Factual Knowledge	capital_world	Luanda is to Angola as Manila is to	philippines	the	0.6	0	1	{'the': 0.6, '______': 0.08, '__': 0.05, 'Philippines': 0.05, '?': 0.02}	3	0.045166	0.556396	0.99997	key	key|target	0.82	TRUE	TRUE	TRUE	target	{'philippines': 0.82}
Factual Knowledge	name_occupation	haydn is to composer as pacino is to	actor	actor	0.57	1	1	{'actor': 0.57, '?': 0.03, 'what': 0.02, '': 0.02, ':': 0.02}	0	0.566406	0	1	key	key|target	0.82	TRUE	TRUE	TRUE	target	{'actor': 0.82}
Factual Knowledge	capital_world	Paris is to France as Baghdad is to	iraq	Iraq	0.53	1	1	{'Iraq': 0.53, 'what': 0.1, '______': 0.05, '__': 0.03, '_____': 0.02}	0	0.527344	0	1	key	key|target	0.82	TRUE	TRUE	TRUE	target	{'iraq': 0.82}
Factual Knowledge	name_occupation	hegel is to philosopher as tolstoi is to	novelist	novelist	0.52	1	1	{'novelist': 0.52, 'writer': 0.19, 'author': 0.05, 'fiction': 0.01, 'novel': 0.01}	0	0.515625	0	1	key	key|target	0.82	TRUE	TRUE	TRUE	target	{'novelist': 0.82}
Factual Knowledge	capital_world	Windhoek is to Namibia as Abuja is to	nigeria	Nigeria	0.5	1	1	{'Nigeria': 0.5, '______': 0.1, '__': 0.07, 'which': 0.03, '': 0.03}	0	0.496094	0	1	key	key|target	0.82	TRUE	TRUE	TRUE	target	{'nigeria': 0.82}
Factual Knowledge	country_capital	Canada is to Ottawa as Italy is to	rome	Rome	0.49	1	1	{'Rome': 0.49, '__': 0.07, '______': 0.04, '': 0.03, ':': 0.02}	0	0.492188	0	1	key	key|target	0.82	TRUE	TRUE	TRUE	target	{'rome': 0.82}
Factual Knowledge	capital_world	Warsaw is to Poland as Ankara is to	turkey	Turkey	0.49	1	1	{'Turkey': 0.49, '______': 0.11, '__': 0.05, 'what': 0.05, 'which': 0.02}	0	0.492188	0	1	key	key|target	0.82	TRUE	TRUE	TRUE	target	{'turkey': 0.82}
Factual Knowledge	capital_world	Canada is to Ottawa as Italy is to	rome	Rome	0.49	1	1	{'Rome': 0.49, '__': 0.07, '______': 0.04, '': 0.03, ':': 0.02}	0	0.492188	0	1	key	key|target	0.82	TRUE	TRUE	TRUE	target	{'rome': 0.82}
Factual Knowledge	capital_world	Paris is to France as Vilnius is to	lithuania	Lithuania	0.47	1	1	{'Lithuania': 0.47, 'what': 0.11, 'which': 0.07, '______': 0.03, ':': 0.01}	0	0.474609	0	1	key	key|target	0.82	TRUE	TRUE	TRUE	target	{'lithuania': 0.82}
Factual Knowledge	name_occupation	andersen is to writer as beethoven is to	composer	composer	0.46	1	1	{'composer': 0.46, 'musician': 0.19, 'music': 0.05, 'pian': 0.02, 'what': 0.02}	0	0.455078	0	1	key	key|target	0.82	TRUE	TRUE	TRUE	target	{'composer': 0.82}
Factual Knowledge	country_capital	Germany is to Berlin as Jamaica is to	kingston	Kingston	0.45	1	1	{'Kingston': 0.45, 'Mont': 0.06, '______': 0.04, '__': 0.03, ':': 0.02}	0	0.449219	0	1	key	key|target	0.82	TRUE	TRUE	TRUE	target	{'kingston': 0.82}
Factual Knowledge	capital_world	Eritrea is to Asmara as Finland is to	helsinki	Helsinki	0.45	1	1	{'Helsinki': 0.45, '______': 0.05, '?': 0.04, '__': 0.04}	0	0.447266	0	1	key	key|target	0.82	TRUE	TRUE	TRUE	target	{'helsinki': 0.82}
Factual Knowledge	capital_world	Germany is to Berlin as Jamaica is to	kingston	Kingston	0.45	1	1	{'Kingston': 0.45, 'Mont': 0.06, '______': 0.04, '__': 0.03, ':': 0.02}	0	0.449219	0	1	key	key|target	0.82	TRUE	TRUE	TRUE	target	{'kingston': 0.82}
Factual Knowledge	name_nationality	machiavelli is to Italian as newton is to	english	English	0.44	1	1	{'English': 0.44, 'english': 0.09, 'British': 0.06, 'England': 0.05, 'physics': 0.03}	0	0.443359	0	1	key	key|target	0.82	TRUE	TRUE	TRUE	target	{'english': 0.82}
Factual Knowledge	country_capital	Copenhagen is to Denmark as Taipei is to	taiwan	Taiwan	0.4	1	1	{'Taiwan': 0.4, '______': 0.06, '__': 0.06, '?': 0.04, '_____': 0.03}	0	0.396484	0	1	key	key|target	0.82	TRUE	TRUE	TRUE	target	{'taiwan': 0.82}
Factual Knowledge	country_capital	Canberra is to Australia as Taipei is to	taiwan	Taiwan	0.37	1	1	{'Taiwan': 0.37, '?': 0.07, '__': 0.07, '______': 0.06, '_____': 0.03}	0	0.371094	0	1	key	key|target	0.82	TRUE	TRUE	TRUE	target	{'taiwan': 0.82}
Factual Knowledge	country_capital	Kiev is to Ukraine as Taipei is to	taiwan	Taiwan	0.36	1	1	{'Taiwan': 0.36, 'China': 0.3, '______': 0.05, 'the': 0.04, '__': 0.04}	0	0.357422	0	1	key	key|target	0.82	TRUE	TRUE	TRUE	target	{'taiwan': 0.82}
Factual Knowledge	capital_world	Uzbekistan is to Tashkent as Switzerland is to	bern	Bern	0.36	1	1	{'Bern': 0.36, 'Zurich': 0.08, '______': 0.03, 'what': 0.03, ':': 0.03}	0	0.359375	0	1	key	key|target	0.82	TRUE	TRUE	TRUE	target	{'bern': 0.82}
Factual Knowledge	name_occupation	descartes is to mathematician as mozart is to	composer	composer	0.35	1	1	{'composer': 0.35, 'musician': 0.32, 'pian': 0.07, 'music': 0.01, '?': 0.01}	0	0.345703	0	1	key	key|target	0.82	TRUE	TRUE	TRUE	target	{'composer': 0.82}
Factual Knowledge	capital_world	Berlin is to Germany as Bratislava is to	slovakia	Slovakia	0.35	1	1	{'Slovakia': 0.35, 'what': 0.11, 'which': 0.11, '______': 0.04, '__': 0.02}	0	0.347656	0	1	key	key|target	0.82	TRUE	TRUE	TRUE	target	{'slovakia': 0.82}
Factual Knowledge	capital_world	Vientiane is to Laos as Astana is to	kazakhstan	which	0.32	0	1	{'which': 0.32, '?': 0.02, 'Kazakhstan': 0.17, 'what': 0.11}	2	0.167969	0.15625	0.99998	key	key|target	0.82	TRUE	TRUE	TRUE	target	{'kazakhstan': 0.82}
Factual Knowledge	country_capital	Indonesia is to Jakarta as Portugal is to	lisbon	Lisbon	0.29	1	1	{'Lisbon': 0.29, '______': 0.06, ':': 0.06, '__': 0.06, '?': 0.06}	0	0.291016	0	1	key	key|target	0.82	TRUE	TRUE	TRUE	target	{'lisbon': 0.82}
Factual Knowledge	capital_world	Indonesia is to Jakarta as Portugal is to	lisbon	Lisbon	0.29	1	1	{'Lisbon': 0.29, '______': 0.06, ':': 0.06, '__': 0.06, '?': 0.06}	0	0.291016	0	1	key	key|target	0.82	TRUE	TRUE	TRUE	target	{'lisbon': 0.82}
Factual Knowledge	capital_world	Canada is to Ottawa as Egypt is to	cairo	Cairo	0.29	1	1	{'Cairo': 0.29, ':': 0.07, '__': 0.06, '______': 0.04}	0	0.287109	0	1	key	key|target	0.82	TRUE	TRUE	TRUE	target	{'cairo': 0.82}
Factual Knowledge	country_capital	Iraq is to Baghdad as Cuba is to	havana	Havana	0.28	1	1	{'Havana': 0.28, '______': 0.09, '__': 0.06, ':': 0.06, '_____': 0.05}	0	0.277344	0	1	key	key|target	0.82	TRUE	TRUE	TRUE	target	{'havana': 0.82}
Factual Knowledge	capital_world	Iraq is to Baghdad as Cuba is to	havana	Havana	0.28	1	1	{'Havana': 0.28, '______': 0.09, '__': 0.06, ':': 0.06, '_____': 0.05}	0	0.277344	0	1	key	key|target	0.82	TRUE	TRUE	TRUE	target	{'havana': 0.82}
Factual Knowledge	name_occupation	balzac is to novelist as einstein is to	physicist	scientist	0.27	0	1	{'scientist': 0.27, 'physicist': 0.17, '?': 0.04, '______': 0.03, ':': 0.02}	1	0.166016	0.107422	0.99999	key	key|target	0.82	TRUE	TRUE	TRUE	target	{'physicist': 0.82}
Factual Knowledge	country_capital	Kenya is to Nairobi as Taiwan is to	taipei	Taipei	0.24	1	1	{'Taipei': 0.24, '______': 0.11, '__': 0.09, '___': 0.05, '_____': 0.04}	0	0.243164	0	1	key	key|target	0.82	TRUE	TRUE	TRUE	target	{'taipei': 0.82}
Factual Knowledge	capital_world	Kenya is to Nairobi as Taiwan is to	taipei	Taipei	0.24	1	1	{'Taipei': 0.24, '______': 0.11, '__': 0.09, '___': 0.05, '_____': 0.04}	0	0.243164	0	1	key	key|target	0.82	TRUE	TRUE	TRUE	target	{'taipei': 0.82}
Factual Knowledge	capital_world	Santiago is to Chile as Ankara is to	turkey	Turkey	0.22	1	1	{'Turkey': 0.22, 'what': 0.12, '______': 0.11, '__': 0.09, '___': 0.05}	0	0.21582	0	1	key	key|target	0.82	TRUE	TRUE	TRUE	target	{'turkey': 0.82}
Factual Knowledge	name_occupation	andersen is to writer as marx is to	philosopher	philosopher	0.2	1	1	{'philosopher': 0.2, 'economist': 0.16, 'politician': 0.04, 'thinker': 0.03, 'scientist': 0.02}	0	0.198242	0	1	key	key|target	0.82	TRUE	TRUE	TRUE	target	{'philosopher': 0.82}
Factual Knowledge	capital_world	Rwanda is to Kigali as Peru is to	lima	Lima	0.19	1	1	{'Lima': 0.19, '______': 0.07, '__': 0.05, 'C': 0.05, ':': 0.04}	0	0.189453	0	1	key	key|target	0.82	TRUE	TRUE	TRUE	target	{'lima': 0.82}
Factual Knowledge	country_capital	Indonesia is to Jakarta as Taiwan is to	taipei	Taipei	0.17	1	1	{'Taipei': 0.17, '__': 0.12, '______': 0.09, '____': 0.07, '?': 0.07}	0	0.172852	0	1	key	key|target	0.82	TRUE	TRUE	TRUE	target	{'taipei': 0.82}
Factual Knowledge	name_nationality	lenin is to Soviet as spinoza is to	dutch	Jewish	0.17	0	1	{'Jewish': 0.17, 'Dutch': 0.11, 'jewish': 0.08, 'Jew': 0.04, 'jew': 0.03}	1	0.110352	0.0605469	0.99999	key	key|target	0.82	TRUE	TRUE	TRUE	target	{'dutch': 0.82}
Factual Knowledge	country_language	Bahamas is to English as Taiwan is to	chinese	Chinese	0.16	1	1	{'Chinese': 0.16, '______': 0.13, 'Mandarin': 0.09, '____': 0.05, '_____': 0.05}	0	0.15918	0	1	key	key|target	0.82	TRUE	TRUE	TRUE	target	{'chinese': 0.82}
Factual Knowledge	country_language	Guyana is to English as Iran is to	persian	______	0.11	0	1	{'______': 0.11, 'Arabic': 0.1, 'F': 0.1, '_____': 0.08, 'Persian': 0.08}	3	0.0795898	0.0288086	0.99997	key	key|target	0.82	TRUE	TRUE	TRUE	target	{'persian': 0.82}
Factual Knowledge	capital_world	Burundi is to Bujumbura as Portugal is to	lisbon	what	0.11	0	1	{'what': 0.11, '______': 0.09, '__': 0.07, 'Lisbon': 0.06, ':': 0.05}	3	0.0634766	0.0478516	0.99997	key	key|target	0.82	TRUE	TRUE	TRUE	target	{'lisbon': 0.82}
Factual Knowledge	capital_world	Sudan is to Khartoum as Spain is to	madrid	Madrid	0.09	1	1	{'Madrid': 0.09, '?': 0.04, 'what': 0.09, '______': 0.08}	2	0.0917969	0	0.99998	key	key|target	0.82	TRUE	TRUE	TRUE	target	{'madrid': 0.82}
Factual Knowledge	capital_world	Kampala is to Uganda as Muscat is to	oman	__	0.08	0	1	{'__': 0.08, 'Oman': 0.08, '______': 0.08, '___': 0.07, '?': 0.07}	2	0.0805664	0.00244141	0.99998	key	key|target	0.82	TRUE	TRUE	TRUE	target	{'oman': 0.82}
Factual Knowledge	UK_city_county	newcastle is to northumberland as wells is to	somerset	som	0.93	0.5	0.5	{'som': 0.93, 'what': 0.0, '-': 0.0, 'corn': 0.0, 'wilt': 0.0}	28	0.000530243	0.933064	0.999721	key	key|target	0.82	TRUE	TRUE	TRUE	target	{'somerset': 0.82, 'bath': 0.1}
Factual Knowledge	name_occupation	balzac is to novelist as euler is to	mathematician	mathematic	0.69	0.5	0.5	{'mathematic': 0.69, 'math': 0.02, 'mathematics': 0.02, '______': 0.01, ':': 0.01}	0	0.6875	0	1	key	key|target	0.82	TRUE	TRUE	TRUE	target	{'mathematician': 0.82}
Factual Knowledge	capital_world	Laos is to Vientiane as Gambia is to	banjul	Ban	0.42	0.5	0.5	{'Ban': 0.42, '?': 0.05, '__': 0.03, '____': 0.03, '': 0.03}	0	0.423828	0	1	key	key|target	0.82	TRUE	TRUE	TRUE	target	{'banjul': 0.82}
Factual Knowledge	capital_world	Croatia is to Zagreb as Nigeria is to	abuja	Abu	0.33	0.5	0.5	{'Abu': 0.33, '______': 0.07, '____': 0.05, '_____': 0.05, 'Lagos': 0.04}	0	0.333984	0	1	key	key|target	0.82	TRUE	TRUE	TRUE	target	{'abuja': 0.82}
Factual Knowledge	UK_city_county	hull is to yorkshire as lincoln is to	lincolnshire	lin	0.26	0.5	0.5	{'lin': 0.26, 'k': 0.05, 'not': 0.03, 'mass': 0.03, 'eng': 0.03}	0	0.255859	0	1	key	key|target	0.82	TRUE	TRUE	TRUE	target	{'lincolnshire': 0.82}
Factual Knowledge	capital_world	Madagascar is to Antananarivo as Kyrgyzstan is to	bishkek	B	0.26	0.5	0.5	{'B': 0.26, '__': 0.08, '____': 0.04, 'what': 0.04, '______': 0.04}	331	7.39098e-05	0.257739	0.996702	key	key|target	0.82	TRUE	TRUE	TRUE	target	{'bishkek': 0.82}
Factual Knowledge	capital_world	Sofia is to Bulgaria as Asmara is to	eritrea	what	0.18	0	0.5	{'what': 0.18, '?': 0.13, 'which': 0.09, 'E': 0.09, '?"': 0.07}	29	0.00363159	0.174103	0.999711	key	key|target	0.82	TRUE	TRUE	TRUE	target	{'eritrea': 0.82}
Factual Knowledge	capital_world	France is to Paris as Namibia is to	windhoek	__	0.15	0	0.5	{'__': 0.15, 'Wind': 0.1, '______': 0.09, '_____': 0.07, '____': 0.06}	1	0.0957031	0.0527344	0.99999	key	key|target	0.82	TRUE	TRUE	TRUE	target	{'windhoek': 0.82}
Factual Knowledge	capital_world	Azerbaijan is to Baku as Vietnam is to	hanoi	H	0.15	0.5	0.5	{'H': 0.15, '______': 0.1, '__': 0.07, ':': 0.07, '': 0.05}	31	0.00408936	0.144348	0.999691	key	key|target	0.82	TRUE	TRUE	TRUE	target	{'hanoi': 0.82}
Factual Knowledge	capital_world	Venezuela is to Caracas as Zambia is to	lusaka	L	0.14	0.5	0.5	{'L': 0.14, '?': 0.06, ':': 0.05}	107	0.000511169	0.136208	0.998934	key	key|target	0.82	TRUE	TRUE	TRUE	target	{'lusaka': 0.82}
Factual Knowledge	capital_world	Slovenia is to Ljubljana as Latvia is to	riga	R	0.13	0.5	0.5	{'R': 0.13, '?': 0.04, 'what': 0.08, '?"': 0.05}	302	8.24928e-05	0.131753	0.996991	key	key|target	0.82	TRUE	TRUE	TRUE	target	{'riga': 0.82}
Factual Knowledge	capital_world	Chile is to Santiago as Namibia is to	windhoek	__	0.13	0	0.5	{'__': 0.13, '____': 0.11, '_____': 0.1, '______': 0.09, 'Wind': 0.07}	4	0.0732422	0.0556641	0.99996	key	key|target	0.82	TRUE	TRUE	TRUE	target	{'windhoek': 0.82}
Factual Knowledge	capital_world	Stockholm is to Sweden as Banjul is to	gambia	?	0.12	0	0.5	{'?': 0.12, 'what': 0.1, 'The': 0.07, 'G': 0.06, '___': 0.04}	111	0.000457764	0.118683	0.998894	key	key|target	0.82	TRUE	TRUE	TRUE	target	{'gambia': 0.82}
Factual Knowledge	capital_world	Liberia is to Monrovia as Morocco is to	rabat	__	0.1	0	0.5	{'__': 0.1, '______': 0.09, 'Rab': 0.08, 'Cas': 0.07, '____': 0.04}	2	0.0761719	0.027832	0.99998	key	key|target	0.82	TRUE	TRUE	TRUE	target	{'rabat': 0.82}
Factual Knowledge	capital_world	Samoa is to Apia as Vietnam is to	hanoi	______	0.1	0	0.5	{'______': 0.1, '__': 0.07, '?': 0.06, 'Ho': 0.05, 'H': 0.04}	47	0.00294495	0.097641	0.999532	key	key|target	0.82	TRUE	TRUE	TRUE	target	{'hanoi': 0.82}
Factual Knowledge	UK_city_county	cardiff is to glamorgan as oxford is to	oxfordshire	o	0.09	0.5	0.5	{'o': 0.09, '___': 0.06, 'what': 0.05, '______': 0.04, '____': 0.03}	28	0.0102539	0.0810547	0.999721	key	key|target	0.82	TRUE	TRUE	TRUE	target	{'oxfordshire': 0.82}
Factual Knowledge	capital_world	Beirut is to Lebanon as Georgetown is to	guyana	Washington	0.67	0	0	{'Washington': 0.67, 'the': 0.09, 'D': 0.08, 'DC': 0.06, 'Georgetown': 0.01}	9	0.00213623	0.669739	0.99991	key	key|target	0.82	TRUE	TRUE	TRUE	target	{'guyana': 0.82}
Factual Knowledge	country_capital	Philippines is to Manila as Georgia is to	tbilisi	Atlanta	0.62	0	0	{'Atlanta': 0.62, '__': 0.05, '______': 0.04, '?': 0.01, ':': 0.01}	647	1.04308e-05	0.617177	0.993553	key	key|target	0.82	TRUE	TRUE	TRUE	target	{'tbilisi': 0.82}
Factual Knowledge	capital_world	Philippines is to Manila as Georgia is to	tbilisi	Atlanta	0.62	0	0	{'Atlanta': 0.62, '__': 0.05, '______': 0.04, '?': 0.01, ':': 0.01}	647	1.04308e-05	0.617177	0.993553	key	key|target	0.82	TRUE	TRUE	TRUE	target	{'tbilisi': 0.82}
Factual Knowledge	country_capital	England is to London as Georgia is to	tbilisi	Atlanta	0.59	0	0	{'Atlanta': 0.59, '______': 0.06, '__': 0.05, 'what': 0.03, '?': 0.01}	1014	4.91738e-06	0.585933	0.989896	key	key|target	0.82	TRUE	TRUE	TRUE	target	{'tbilisi': 0.82}
Factual Knowledge	capital_world	England is to London as Georgia is to	tbilisi	Atlanta	0.59	0	0	{'Atlanta': 0.59, '______': 0.06, '__': 0.05, 'what': 0.03, '?': 0.01}	1014	4.91738e-06	0.585933	0.989896	key	key|target	0.82	TRUE	TRUE	TRUE	target	{'tbilisi': 0.82}
Factual Knowledge	name_occupation	hegel is to philosopher as strauss is to	composer	political	0.21	0	0	{'political': 0.21, 'historian': 0.09, 'philosopher': 0.08, 'politician': 0.02, 'scholar': 0.02}	97	0.00119019	0.2117	0.999033	key	key|target	0.82	TRUE	TRUE	TRUE	target	{'composer': 0.82}
Factual Knowledge	capital_world	Zagreb is to Croatia as Canberra is to	australia	Australia	0.95	1	1	{'Australia': 0.95, '__': 0.0, '______': 0.0, '': 0.0, 'what': 0.0}	0	0.953125	0	1	key	key|target	0.81	TRUE	TRUE	TRUE	target	{'australia': 0.81}
Factual Knowledge	capital_world	Baku is to Azerbaijan as Bangkok is to	thailand	Thailand	0.94	1	1	{'Thailand': 0.94, 'what': 0.01, 'S': 0.0, '______': 0.0, 'Th': 0.0}	0	0.941406	0	1	key	key|target	0.81	TRUE	TRUE	TRUE	target	{'thailand': 0.81}
Factual Knowledge	country_language	Moldova is to Moldovan as Netherlands is to	dutch	Dutch	0.93	1	1	{'Dutch': 0.93, 'N': 0.02, '______': 0.0, '': 0.0, 'Holland': 0.0}	0	0.925781	0	1	key	key|target	0.81	TRUE	TRUE	TRUE	target	{'dutch': 0.81}
Factual Knowledge	country_capital	Conakry is to Guinea as Stockholm is to	sweden	Sweden	0.92	1	1	{'Sweden': 0.92, '__': 0.01, '______': 0.01, 'what': 0.0, '': 0.0}	0	0.921875	0	1	key	key|target	0.81	TRUE	TRUE	TRUE	target	{'sweden': 0.81}
Factual Knowledge	country_capital	Helsinki is to Finland as Stockholm is to	sweden	Sweden	0.92	1	1	{'Sweden': 0.92, 'what': 0.01, '______': 0.01, 'which': 0.01, '__': 0.0}	0	0.917969	0	1	key	key|target	0.81	TRUE	TRUE	TRUE	target	{'sweden': 0.81}
Factual Knowledge	capital_world	Baku is to Azerbaijan as Damascus is to	syria	Syria	0.92	1	1	{'Syria': 0.92, '__': 0.01, '______': 0.01, 'what': 0.01, '...': 0.0}	0	0.921875	0	1	key	key|target	0.81	TRUE	TRUE	TRUE	target	{'syria': 0.81}
Factual Knowledge	capital_world	Helsinki is to Finland as Stockholm is to	sweden	Sweden	0.92	1	1	{'Sweden': 0.92, 'what': 0.01, '______': 0.01, 'which': 0.01, '__': 0.0}	0	0.917969	0	1	key	key|target	0.81	TRUE	TRUE	TRUE	target	{'sweden': 0.81}
Factual Knowledge	country_capital	Conakry is to Guinea as Madrid is to	spain	Spain	0.89	1	1	{'Spain': 0.89, '______': 0.02, '__': 0.01, 'what': 0.01, '_____': 0.01}	0	0.886719	0	1	key	key|target	0.81	TRUE	TRUE	TRUE	target	{'spain': 0.81}
Factual Knowledge	country_capital	Beirut is to Lebanon as Vienna is to	austria	Austria	0.89	1	1	{'Austria': 0.89, 'the': 0.01, '______': 0.01, '__': 0.01, '': 0.01}	0	0.894531	0	1	key	key|target	0.81	TRUE	TRUE	TRUE	target	{'austria': 0.81}
Factual Knowledge	capital_world	Conakry is to Guinea as Madrid is to	spain	Spain	0.89	1	1	{'Spain': 0.89, '______': 0.02, '__': 0.01, 'what': 0.01, '_____': 0.01}	0	0.886719	0	1	key	key|target	0.81	TRUE	TRUE	TRUE	target	{'spain': 0.81}
Factual Knowledge	capital_world	Tunis is to Tunisia as Canberra is to	australia	Australia	0.84	1	1	{'Australia': 0.84, '______': 0.02, '__': 0.02, 'what': 0.01, 'the': 0.01}	0	0.839844	0	1	key	key|target	0.81	TRUE	TRUE	TRUE	target	{'australia': 0.81}
Factual Knowledge	country_capital	Dublin is to Ireland as Lima is to	peru	Peru	0.8	1	1	{'Peru': 0.8, '______': 0.03, '__': 0.02, 'what': 0.02, '_____': 0.01}	0	0.800781	0	1	key	key|target	0.81	TRUE	TRUE	TRUE	target	{'peru': 0.81}
Factual Knowledge	capital_world	Dublin is to Ireland as Lima is to	peru	Peru	0.8	1	1	{'Peru': 0.8, '______': 0.03, '__': 0.02, 'what': 0.02, '_____': 0.01}	0	0.800781	0	1	key	key|target	0.81	TRUE	TRUE	TRUE	target	{'peru': 0.81}
Factual Knowledge	capital_world	Tallinn is to Estonia as Amman is to	jordan	Jordan	0.79	1	1	{'Jordan': 0.79, '__': 0.04, 'what': 0.03, '______': 0.02, '___': 0.01}	0	0.792969	0	1	key	key|target	0.81	TRUE	TRUE	TRUE	target	{'jordan': 0.81}
Factual Knowledge	country_capital	Syria is to Damascus as Norway is to	oslo	Oslo	0.77	1	1	{'Oslo': 0.77, '______': 0.02, '__': 0.02, '...': 0.01, 'Norway': 0.01}	0	0.765625	0	1	key	key|target	0.81	TRUE	TRUE	TRUE	target	{'oslo': 0.81}
Factual Knowledge	country_capital	Lebanon is to Beirut as Denmark is to	copenhagen	Copenhagen	0.77	1	1	{'Copenhagen': 0.77, 'Denmark': 0.02, '...': 0.01, '______': 0.01, '__': 0.01}	0	0.765625	0	1	key	key|target	0.81	TRUE	TRUE	TRUE	target	{'copenhagen': 0.81}
Factual Knowledge	capital_world	Bishkek is to Kyrgyzstan as Copenhagen is to	denmark	Denmark	0.77	1	1	{'Denmark': 0.77, '__': 0.04, ':': 0.02, '______': 0.02, '': 0.02}	0	0.765625	0	1	key	key|target	0.81	TRUE	TRUE	TRUE	target	{'denmark': 0.81}
Factual Knowledge	capital_world	Lebanon is to Beirut as Denmark is to	copenhagen	Copenhagen	0.77	1	1	{'Copenhagen': 0.77, 'Denmark': 0.02, '...': 0.01, '______': 0.01, '__': 0.01}	0	0.765625	0	1	key	key|target	0.81	TRUE	TRUE	TRUE	target	{'copenhagen': 0.81}
Factual Knowledge	country_capital	Belgrade is to Serbia as Oslo is to	norway	Norway	0.75	1	1	{'Norway': 0.75, '______': 0.03, '__': 0.02, 'which': 0.01, ':': 0.01}	0	0.75	0	1	key	key|target	0.81	TRUE	TRUE	TRUE	target	{'norway': 0.81}
Factual Knowledge	capital_world	Montevideo is to Uruguay as Oslo is to	norway	Norway	0.74	1	1	{'Norway': 0.74, '__': 0.03, '______': 0.02, 'what': 0.01, 'which': 0.01}	0	0.738281	0	1	key	key|target	0.81	TRUE	TRUE	TRUE	target	{'norway': 0.81}
Factual Knowledge	country_capital	Paris is to France as Tehran is to	iran	Iran	0.73	1	1	{'Iran': 0.73, 'what': 0.04, 'Pers': 0.02, '______': 0.02, '...': 0.01}	0	0.726562	0	1	key	key|target	0.81	TRUE	TRUE	TRUE	target	{'iran': 0.81}
Factual Knowledge	name_occupation	dante is to poet as depp is to	actor	actor	0.73	1	1	{'actor': 0.73, '...': 0.01, 'what': 0.01, 'movie': 0.01, 'pirate': 0.01}	0	0.734375	0	1	key	key|target	0.81	TRUE	TRUE	TRUE	target	{'actor': 0.81}
Factual Knowledge	capital_world	Kiev is to Ukraine as Managua is to	nicaragua	Nicaragua	0.73	1	1	{'Nicaragua': 0.73, '______': 0.06, 'what': 0.03, '_____': 0.02, '__': 0.02}	0	0.730469	0	1	key	key|target	0.81	TRUE	TRUE	TRUE	target	{'nicaragua': 0.81}
Factual Knowledge	capital_world	Baku is to Azerbaijan as Belgrade is to	serbia	Serbia	0.73	1	1	{'Serbia': 0.73, 'Yugoslavia': 0.04, '__': 0.03, '______': 0.03, 'what': 0.02}	0	0.726562	0	1	key	key|target	0.81	TRUE	TRUE	TRUE	target	{'serbia': 0.81}
Factual Knowledge	capital_world	Paris is to France as Tehran is to	iran	Iran	0.73	1	1	{'Iran': 0.73, 'what': 0.04, 'Pers': 0.02, '______': 0.02, '...': 0.01}	0	0.726562	0	1	key	key|target	0.81	TRUE	TRUE	TRUE	target	{'iran': 0.81}
Factual Knowledge	capital_world	Kabul is to Afghanistan as Athens is to	greece	Greece	0.69	1	1	{'Greece': 0.69, '__': 0.05, '______': 0.03, 'what': 0.02, '_____': 0.01}	0	0.691406	0	1	key	key|target	0.81	TRUE	TRUE	TRUE	target	{'greece': 0.81}
Factual Knowledge	name_occupation	kant is to philosopher as pacino is to	actor	actor	0.67	1	1	{'actor': 0.67, 'the': 0.02, 'movie': 0.02, 'gang': 0.01, 'mob': 0.01}	0	0.667969	0	1	key	key|target	0.81	TRUE	TRUE	TRUE	target	{'actor': 0.81}
Factual Knowledge	country_capital	Conakry is to Guinea as Hanoi is to	vietnam	Vietnam	0.66	1	1	{'Vietnam': 0.66, 'Viet': 0.17, '______': 0.04, '__': 0.02, '_____': 0.01}	0	0.664062	0	1	key	key|target	0.81	TRUE	TRUE	TRUE	target	{'vietnam': 0.81}
Factual Knowledge	capital_world	Moscow is to Russia as Baghdad is to	iraq	Iraq	0.66	1	1	{'Iraq': 0.66, '______': 0.05, 'what': 0.04, '__': 0.04, '_____': 0.02}	0	0.65625	0	1	key	key|target	0.81	TRUE	TRUE	TRUE	target	{'iraq': 0.81}
Factual Knowledge	capital_world	Conakry is to Guinea as Hanoi is to	vietnam	Vietnam	0.66	1	1	{'Vietnam': 0.66, 'Viet': 0.17, '______': 0.04, '__': 0.02, '_____': 0.01}	0	0.664062	0	1	key	key|target	0.81	TRUE	TRUE	TRUE	target	{'vietnam': 0.81}
Factual Knowledge	country_language	Mozambique is to Portuguese as Taiwan is to	chinese	Chinese	0.65	1	1	{'Chinese': 0.65, 'Mandarin': 0.17, '______': 0.02, 'China': 0.02, '': 0.01}	0	0.648438	0	1	key	key|target	0.81	TRUE	TRUE	TRUE	target	{'chinese': 0.81}
Factual Knowledge	country_language	Colombia is to Spanish as Taiwan is to	chinese	Chinese	0.64	1	1	{'Chinese': 0.64, 'Mandarin': 0.18, 'China': 0.02, '______': 0.02, '': 0.02}	0	0.644531	0	1	key	key|target	0.81	TRUE	TRUE	TRUE	target	{'chinese': 0.81}
Factual Knowledge	name_occupation	hawking is to physicist as pacino is to	actor	actor	0.64	1	1	{'actor': 0.64, 'gang': 0.03, 'acting': 0.02, 'mob': 0.01, 'movie': 0.01}	0	0.644531	0	1	key	key|target	0.81	TRUE	TRUE	TRUE	target	{'actor': 0.81}
Factual Knowledge	country_capital	Canberra is to Australia as Kingston is to	jamaica	Jamaica	0.63	1	1	{'Jamaica': 0.63, 'Canada': 0.1, '__': 0.03, '______': 0.02, 'what': 0.02}	0	0.628906	0	1	key	key|target	0.81	TRUE	TRUE	TRUE	target	{'jamaica': 0.81}
Factual Knowledge	capital_world	Canberra is to Australia as Kingston is to	jamaica	Jamaica	0.63	1	1	{'Jamaica': 0.63, 'Canada': 0.1, '__': 0.03, '______': 0.02, 'what': 0.02}	0	0.628906	0	1	key	key|target	0.81	TRUE	TRUE	TRUE	target	{'jamaica': 0.81}
Factual Knowledge	capital_world	Kingston is to Jamaica as Nicosia is to	cyprus	Cyprus	0.62	1	1	{'Cyprus': 0.62, 'which': 0.08, 'what': 0.05, '__': 0.03, '______': 0.02}	0	0.617188	0	1	key	key|target	0.81	TRUE	TRUE	TRUE	target	{'cyprus': 0.81}
Factual Knowledge	capital_world	Tunis is to Tunisia as Budapest is to	hungary	Hungary	0.61	1	1	{'Hungary': 0.61, '______': 0.07, '__': 0.03, 'what': 0.03, '_____': 0.01}	0	0.605469	0	1	key	key|target	0.81	TRUE	TRUE	TRUE	target	{'hungary': 0.81}
Factual Knowledge	capital_world	Paris is to France as Bangkok is to	thailand	Thailand	0.61	1	1	{'Thailand': 0.61, 'what': 0.06, '______': 0.04, '_____': 0.03, 'which': 0.02}	0	0.605469	0	1	key	key|target	0.81	TRUE	TRUE	TRUE	target	{'thailand': 0.81}
Factual Knowledge	country_capital	Budapest is to Hungary as Kingston is to	jamaica	Jamaica	0.57	1	1	{'Jamaica': 0.57, '__': 0.05, '______': 0.04, 'Canada': 0.03, 'what': 0.02}	0	0.566406	0	1	key	key|target	0.81	TRUE	TRUE	TRUE	target	{'jamaica': 0.81}
Factual Knowledge	country_capital	Baghdad is to Iraq as Dublin is to	ireland	Ireland	0.57	1	1	{'Ireland': 0.57, '______': 0.09, '__': 0.04, 'what': 0.04, '____': 0.04}	0	0.574219	0	1	key	key|target	0.81	TRUE	TRUE	TRUE	target	{'ireland': 0.81}
Factual Knowledge	capital_world	Baghdad is to Iraq as Dublin is to	ireland	Ireland	0.57	1	1	{'Ireland': 0.57, '______': 0.09, '__': 0.04, 'what': 0.04, '____': 0.04}	0	0.574219	0	1	key	key|target	0.81	TRUE	TRUE	TRUE	target	{'ireland': 0.81}
Factual Knowledge	capital_world	Budapest is to Hungary as Kingston is to	jamaica	Jamaica	0.57	1	1	{'Jamaica': 0.57, '__': 0.05, '______': 0.04, 'Canada': 0.03, 'what': 0.02}	0	0.566406	0	1	key	key|target	0.81	TRUE	TRUE	TRUE	target	{'jamaica': 0.81}
Factual Knowledge	name_occupation	dante is to poet as mozart is to	composer	composer	0.54	1	1	{'composer': 0.54, 'musician': 0.18, 'pian': 0.02, 'music': 0.01, '': 0.01}	0	0.542969	0	1	key	key|target	0.81	TRUE	TRUE	TRUE	target	{'composer': 0.81}
Factual Knowledge	country_capital	Brussels is to Belgium as Islamabad is to	pakistan	Pakistan	0.53	1	1	{'Pakistan': 0.53, '______': 0.09, '__': 0.04, ':': 0.03, '_____': 0.02}	0	0.53125	0	1	key	key|target	0.81	TRUE	TRUE	TRUE	target	{'pakistan': 0.81}
Factual Knowledge	capital_world	Brussels is to Belgium as Islamabad is to	pakistan	Pakistan	0.53	1	1	{'Pakistan': 0.53, '______': 0.09, '__': 0.04, ':': 0.03, '_____': 0.02}	0	0.53125	0	1	key	key|target	0.81	TRUE	TRUE	TRUE	target	{'pakistan': 0.81}
Factual Knowledge	name_occupation	hume is to philosopher as wagner is to	composer	composer	0.5	1	1	{'composer': 0.5, 'musician': 0.1, 'opera': 0.04, 'music': 0.03, '?': 0.02}	0	0.5	0	1	key	key|target	0.81	TRUE	TRUE	TRUE	target	{'composer': 0.81}
Factual Knowledge	name_occupation	hegel is to philosopher as maxwell is to	physicist	physicist	0.5	1	1	{'physicist': 0.5, 'scientist': 0.22, 'physics': 0.06, 'physicists': 0.03, 'mathematic': 0.01}	0	0.503906	0	1	key	key|target	0.81	TRUE	TRUE	TRUE	target	{'physicist': 0.81}
Factual Knowledge	capital_world	Madagascar is to Antananarivo as Lebanon is to	beirut	Beirut	0.5	1	1	{'Beirut': 0.5, '__': 0.12, '______': 0.07, '___': 0.02, '____': 0.02}	0	0.496094	0	1	key	key|target	0.81	TRUE	TRUE	TRUE	target	{'beirut': 0.81}
Factual Knowledge	country_capital	Ukraine is to Kiev as Poland is to	warsaw	Warsaw	0.42	1	1	{'Warsaw': 0.42, '______': 0.09, '_____': 0.04, '__': 0.04, '____': 0.04}	0	0.419922	0	1	key	key|target	0.81	TRUE	TRUE	TRUE	target	{'warsaw': 0.81}
Factual Knowledge	capital_world	Burundi is to Bujumbura as Jamaica is to	kingston	Kingston	0.42	1	1	{'Kingston': 0.42, '__': 0.06, ':': 0.04, '': 0.03}	0	0.417969	0	1	key	key|target	0.81	TRUE	TRUE	TRUE	target	{'kingston': 0.81}
Factual Knowledge	name_occupation	locke is to philosopher as pacino is to	actor	actor	0.41	1	1	{'actor': 0.41, 'the': 0.03, '__': 0.02, '': 0.02, '?': 0.02}	0	0.410156	0	1	key	key|target	0.81	TRUE	TRUE	TRUE	target	{'actor': 0.81}
Factual Knowledge	name_occupation	hegel is to philosopher as lincoln is to	president	president	0.39	1	1	{'president': 0.39, 'politician': 0.12, 'states': 0.04, 'lawyer': 0.03, '______': 0.02}	0	0.390625	0	1	key	key|target	0.81	TRUE	TRUE	TRUE	target	{'president': 0.81}
Factual Knowledge	country_capital	Australia is to Canberra as Poland is to	warsaw	Warsaw	0.36	1	1	{'Warsaw': 0.36, '______': 0.08, '__': 0.04, 'G': 0.03, '?': 0.03}	0	0.359375	0	1	key	key|target	0.81	TRUE	TRUE	TRUE	target	{'warsaw': 0.81}
Factual Knowledge	capital_world	Monrovia is to Liberia as Nicosia is to	cyprus	Cyprus	0.35	1	1	{'Cyprus': 0.35, 'what': 0.12, '__': 0.09, 'which': 0.08, ':': 0.07}	0	0.347656	0	1	key	key|target	0.81	TRUE	TRUE	TRUE	target	{'cyprus': 0.81}
Factual Knowledge	capital_world	Montevideo is to Uruguay as Tunis is to	tunisia	Tunisia	0.34	1	1	{'Tunisia': 0.34, 'what': 0.09, '__': 0.07, '______': 0.05, '___': 0.04}	0	0.341797	0	1	key	key|target	0.81	TRUE	TRUE	TRUE	target	{'tunisia': 0.81}
Factual Knowledge	country_language	Fiji is to English as Taiwan is to	chinese	Chinese	0.32	1	1	{'Chinese': 0.32, 'Mandarin': 0.15, '______': 0.1, '__': 0.03, '_____': 0.03}	0	0.320312	0	1	key	key|target	0.81	TRUE	TRUE	TRUE	target	{'chinese': 0.81}
Factual Knowledge	country_capital	Hungary is to Budapest as Iran is to	tehran	Tehran	0.31	1	1	{'Tehran': 0.31, '______': 0.11, '__': 0.07, '____': 0.04, '___': 0.03}	0	0.3125	0	1	key	key|target	0.81	TRUE	TRUE	TRUE	target	{'tehran': 0.81}
Factual Knowledge	capital_world	Venezuela is to Caracas as Cuba is to	havana	Havana	0.31	1	1	{'Havana': 0.31, ':': 0.03, '______': 0.06, '__': 0.06}	0	0.314453	0	1	key	key|target	0.81	TRUE	TRUE	TRUE	target	{'havana': 0.81}
Factual Knowledge	name_nationality	lenin is to Soviet as pascal is to	french	French	0.3	1	1	{'French': 0.3, 'french': 0.22, 'Pascal': 0.04, 'France': 0.02, 'computer': 0.02}	0	0.302734	0	1	key	key|target	0.81	TRUE	TRUE	TRUE	target	{'french': 0.81}
Factual Knowledge	country_capital	Pakistan is to Islamabad as Iran is to	tehran	Tehran	0.29	1	1	{'Tehran': 0.29, ':': 0.06, '?': 0.04}	0	0.292969	0	1	key	key|target	0.81	TRUE	TRUE	TRUE	target	{'tehran': 0.81}
Factual Knowledge	capital_world	Pakistan is to Islamabad as Iran is to	tehran	Tehran	0.29	1	1	{'Tehran': 0.29, ':': 0.06, '?': 0.04}	0	0.292969	0	1	key	key|target	0.81	TRUE	TRUE	TRUE	target	{'tehran': 0.81}
Factual Knowledge	capital_world	Ottawa is to Canada as Skopje is to	macedonia	Macedonia	0.28	1	1	{'Macedonia': 0.28, 'what': 0.1, 'the': 0.08, '______': 0.07, '__': 0.06}	0	0.279297	0	1	key	key|target	0.81	TRUE	TRUE	TRUE	target	{'macedonia': 0.81}
Factual Knowledge	country_language	Guam is to English as Taiwan is to	chinese	Chinese	0.27	1	1	{'Chinese': 0.27, 'Mandarin': 0.18, '______': 0.12, '__': 0.03, '_____': 0.02}	0	0.265625	0	1	key	key|target	0.81	TRUE	TRUE	TRUE	target	{'chinese': 0.81}
Factual Knowledge	name_occupation	goethe is to poet as hawking is to	physicist	physicist	0.25	1	1	{'physicist': 0.25, 'scientist': 0.11, 'ast': 0.03, '______': 0.02, '?': 0.02}	0	0.251953	0	1	key	key|target	0.81	TRUE	TRUE	TRUE	target	{'physicist': 0.81}
Factual Knowledge	name_nationality	lenin is to Soviet as newton is to	english	English	0.25	1	1	{'English': 0.25, 'British': 0.16, 'England': 0.08, 'American': 0.07, 'english': 0.05}	0	0.253906	0	1	key	key|target	0.81	TRUE	TRUE	TRUE	target	{'english': 0.81}
Factual Knowledge	name_occupation	andersen is to writer as lincoln is to	president	president	0.24	1	1	{'president': 0.24, 'politician': 0.09, '______': 0.03, 'lawyer': 0.03, 'actor': 0.02}	0	0.242188	0	1	key	key|target	0.81	TRUE	TRUE	TRUE	target	{'president': 0.81}
Factual Knowledge	capital_world	Rome is to Italy as Tallinn is to	estonia	Estonia	0.22	1	1	{'Estonia': 0.22, 'what': 0.1, 'which': 0.07, '______': 0.06, '__': 0.05}	0	0.22168	0	1	key	key|target	0.81	TRUE	TRUE	TRUE	target	{'estonia': 0.81}
Factual Knowledge	capital_world	Valletta is to Malta as Bamako is to	mali	what	0.19	0	1	{'what': 0.19, 'Mali': 0.12, 'which': 0.07, '"': 0.04, '__': 0.04}	1	0.123047	0.0673828	0.99999	key	key|target	0.81	TRUE	TRUE	TRUE	target	{'mali': 0.81}
Factual Knowledge	name_occupation	andersen is to writer as moses is to	prophet	prophet	0.17	1	1	{'prophet': 0.17, 'leader': 0.06, '______': 0.05, '__': 0.03, 'law': 0.03}	0	0.168945	0	1	key	key|target	0.81	TRUE	TRUE	TRUE	target	{'prophet': 0.81}
Factual Knowledge	country_capital	Kenya is to Nairobi as Austria is to	vienna	Vienna	0.17	1	1	{'Vienna': 0.17, '______': 0.07, '__': 0.07, ':': 0.05, 'what': 0.05}	0	0.167969	0	1	key	key|target	0.81	TRUE	TRUE	TRUE	target	{'vienna': 0.81}
Factual Knowledge	capital_world	Kenya is to Nairobi as Austria is to	vienna	Vienna	0.17	1	1	{'Vienna': 0.17, '______': 0.07, '__': 0.07, ':': 0.05, 'what': 0.05}	0	0.167969	0	1	key	key|target	0.81	TRUE	TRUE	TRUE	target	{'vienna': 0.81}
Factual Knowledge	name_occupation	columbus is to explorer as pacino is to	actor	actor	0.16	1	1	{'actor': 0.16, '': 0.03, 'what': 0.05, '"': 0.04}	0	0.158203	0	1	key	key|target	0.81	TRUE	TRUE	TRUE	target	{'actor': 0.81}
Factual Knowledge	name_occupation	haydn is to composer as hitler is to	dictator	politician	0.14	0	1	{'politician': 0.14, 'dictator': 0.09, 'leader': 0.05, 'states': 0.04, 'painter': 0.03}	1	0.0913086	0.050293	0.99999	key	key|target	0.81	TRUE	TRUE	TRUE	target	{'dictator': 0.81}
Factual Knowledge	capital_world	Venezuela is to Caracas as Peru is to	lima	:	0.12	0	1	{':': 0.06, 'Lima': 0.07, '______': 0.05, '?': 0.05}	1	0.0717773	0.0463867	0.99999	key	key|target	0.81	TRUE	TRUE	TRUE	target	{'lima': 0.81}
Factual Knowledge	capital_world	Kyrgyzstan is to Bishkek as Hungary is to	budapest	______	0.1	0	1	{'______': 0.1, '': 0.09, 'Budapest': 0.07, '__': 0.07, ':': 0.06}	3	0.0742188	0.0209961	0.99997	key	key|target	0.81	TRUE	TRUE	TRUE	target	{'budapest': 0.81}
Factual Knowledge	UK_city_county	cambridge is to cambridgeshire as wells is to	somerset	som	0.61	0.5	0.5	{'som': 0.61, '?': 0.02, 'what': 0.02, 'wells': 0.02, '': 0.02}	77	0.000614166	0.612667	0.999233	key	key|target	0.81	TRUE	TRUE	TRUE	target	{'somerset': 0.81}
Factual Knowledge	UK_city_county	lancaster is to lancashire as lincoln is to	lincolnshire	lin	0.55	0.5	0.5	{'lin': 0.55, '______': 0.06, '__': 0.04, '_____': 0.02, 'what': 0.02}	0	0.554688	0	1	key	key|target	0.81	TRUE	TRUE	TRUE	target	{'lincolnshire': 0.81}
Factual Knowledge	capital_world	Bangkok is to Thailand as Georgetown is to	guyana	Malaysia	0.51	0	0.5	{'Malaysia': 0.51, 'Pen': 0.21, 'Guy': 0.06, 'the': 0.02, 'Br': 0.02}	2	0.0629883	0.44873	0.99998	key	key|target	0.81	TRUE	TRUE	TRUE	target	{'guyana': 0.81}
Factual Knowledge	name_occupation	hegel is to philosopher as michelangelo is to	sculptor	artist	0.49	0	0.5	{'artist': 0.49, 'sculpt': 0.18, 'painter': 0.07, 'what': 0.01, '__': 0.01}	1	0.180664	0.311523	0.99999	key	key|target	0.81	TRUE	TRUE	TRUE	target	{'sculptor': 0.81}
Factual Knowledge	country_capital	Ukraine is to Kiev as Croatia is to	zagreb	Zag	0.48	0.5	0.5	{'Zag': 0.48, '__': 0.06, '______': 0.04, 'what': 0.03, '"': 0.02}	0	0.476562	0	1	key	key|target	0.81	TRUE	TRUE	TRUE	target	{'zagreb': 0.81}
Factual Knowledge	UK_city_county	wakefield is to yorkshire as worcester is to	worcestershire	wor	0.43	0.5	0.5	{'wor': 0.43, 'gl': 0.08, 'som': 0.07, 'war': 0.04, 'here': 0.03}	0	0.427734	0	1	key	key|target	0.81	TRUE	TRUE	TRUE	target	{'worcestershire': 0.81}
Factual Knowledge	capital_world	Somalia is to Mogadishu as Libya is to	tripoli	Trip	0.36	0.5	0.5	{'Trip': 0.36, '______': 0.07, '__': 0.06, ':': 0.02}	0	0.363281	0	1	key	key|target	0.81	TRUE	TRUE	TRUE	target	{'tripoli': 0.81}
Factual Knowledge	capital_world	Canada is to Ottawa as Libya is to	tripoli	Trip	0.32	0.5	0.5	{'Trip': 0.32, '"': 0.05, '______': 0.04, '__': 0.04, ':': 0.03}	0	0.324219	0	1	key	key|target	0.81	TRUE	TRUE	TRUE	target	{'tripoli': 0.81}
Factual Knowledge	capital_world	Lithuania is to Vilnius as Gambia is to	banjul	Ban	0.27	0.5	0.5	{'Ban': 0.27, '______': 0.11, '__': 0.06, '?': 0.04, '____': 0.04}	0	0.269531	0	1	key	key|target	0.81	TRUE	TRUE	TRUE	target	{'banjul': 0.81}
Factual Knowledge	capital_world	France is to Paris as Latvia is to	riga	R	0.26	0.5	0.5	{'R': 0.26, '______': 0.06, 'what': 0.04, '...': 0.04, '__': 0.03}	118	0.000656128	0.263016	0.998824	key	key|target	0.81	TRUE	TRUE	TRUE	target	{'riga': 0.81}
Factual Knowledge	country_language	Fiji is to English as Philippines is to	tagalog	Filipino	0.24	0	0.5	{'Filipino': 0.24, 'Spanish': 0.22, '______': 0.1, 'Tag': 0.05, '__': 0.05}	4	0.0480957	0.196045	0.99996	key	key|target	0.81	TRUE	TRUE	TRUE	target	{'tagalog': 0.81}
Factual Knowledge	country_capital	Iraq is to Baghdad as Romania is to	bucharest	Buch	0.22	0.5	0.5	{'Buch': 0.22, '______': 0.08, '__': 0.06, ':': 0.06, '_____': 0.05}	0	0.217773	0	1	key	key|target	0.81	TRUE	TRUE	TRUE	target	{'bucharest': 0.81}
Factual Knowledge	capital_world	Iraq is to Baghdad as Romania is to	bucharest	Buch	0.22	0.5	0.5	{'Buch': 0.22, '______': 0.08, '__': 0.06, ':': 0.06, '_____': 0.05}	0	0.217773	0	1	key	key|target	0.81	TRUE	TRUE	TRUE	target	{'bucharest': 0.81}
Factual Knowledge	capital_world	Venezuela is to Caracas as Belarus is to	minsk	M	0.21	0.5	0.5	{'M': 0.21, ':': 0.05, '______': 0.04}	211	0.000131607	0.2069	0.997897	key	key|target	0.81	TRUE	TRUE	TRUE	target	{'minsk': 0.81}
Factual Knowledge	capital_world	Mozambique is to Maputo as Mauritania is to	nouakchott	Nou	0.18	0.5	0.5	{'Nou': 0.18, '__': 0.12, '"': 0.06, '______': 0.06, ':': 0.03}	0	0.181641	0	1	key	key|target	0.81	TRUE	TRUE	TRUE	target	{'nouakchott': 0.81}
Factual Knowledge	country_capital	Serbia is to Belgrade as Georgia is to	tbilisi	__	0.17	0	0.5	{'__': 0.17, 'T': 0.12, '______': 0.1, '____': 0.05, ':': 0.04}	106	0.000648499	0.168297	0.998944	key	key|target	0.81	TRUE	TRUE	TRUE	target	{'tbilisi': 0.81}
Factual Knowledge	capital_world	Liberia is to Monrovia as Macedonia is to	skopje	Sk	0.16	0.5	0.5	{'Sk': 0.16, '__': 0.14, '______': 0.1, 'what': 0.06, '': 0.04}	0	0.158203	0	1	key	key|target	0.81	TRUE	TRUE	TRUE	target	{'skopje': 0.81}
Factual Knowledge	capital_world	Hungary is to Budapest as Sudan is to	khartoum	Kh	0.16	0.5	0.5	{'Kh': 0.16, '______': 0.12, '__': 0.09, '_____': 0.07, '____': 0.06}	0	0.164062	0	1	key	key|target	0.81	TRUE	TRUE	TRUE	target	{'khartoum': 0.81}
Factual Knowledge	name_occupation	goethe is to poet as michelangelo is to	sculptor	artist	0.1	0	0.5	{'artist': 0.1, '?': 0.07, 'sculpt': 0.06, 'a': 0.06, '': 0.04}	2	0.0639648	0.0351562	0.99998	key	key|target	0.81	TRUE	TRUE	TRUE	target	{'sculptor': 0.81}
Factual Knowledge	capital_world	Uruguay is to Montevideo as Liechtenstein is to	vaduz	______	0.1	0	0.5	{'______': 0.1, '__': 0.09, 'what': 0.06, ':': 0.05, 'Vad': 0.05}	4	0.0454102	0.0537109	0.99996	key	key|target	0.81	TRUE	TRUE	TRUE	target	{'vaduz': 0.81}
Factual Knowledge	capital_world	Dominica is to Roseau as Macedonia is to	skopje		0.1	0	0.5	{'': 0.05, '?': 0.08, ':': 0.06, 'Sk': 0.05}	3	0.0544434	0.0412598	0.99997	key	key|target	0.81	TRUE	TRUE	TRUE	target	{'skopje': 0.81}
Factual Knowledge	UK_city_county	bradford is to yorkshire as glasgow is to	lowlands	sc	0.51	0	0	{'sc': 0.51, '______': 0.04, '__': 0.03, '-': 0.02, '?': 0.02}	62	0.000953674	0.506859	0.999382	key	key|target	0.81	TRUE	TRUE	TRUE	target	{'lowlands': 0.81}
Factual Knowledge	country_capital	Ireland is to Dublin as Georgia is to	tbilisi	Atlanta	0.49	0	0	{'Atlanta': 0.49, '__': 0.07, '______': 0.06, '?': 0.01, 'what': 0.01}	595	1.75238e-05	0.488264	0.994071	key	key|target	0.81	TRUE	TRUE	TRUE	target	{'tbilisi': 0.81}
Factual Knowledge	name_nationality	lenin is to Soviet as mozart is to	german	music	0.16	0	0	{'music': 0.16, 'classical': 0.08, 'Mozart': 0.07, 'Bach': 0.03, 'Be': 0.03}	5	0.0291748	0.128052	0.99995	key	key|target	0.81	TRUE	TRUE	TRUE	target	{'german': 0.81}
Factual Knowledge	capital_world	Suva is to Fiji as Bangkok is to	thailand	Thailand	0.97	1	1	{'Thailand': 0.97, 'the': 0.0, 'Southeast': 0.0, 'Asia': 0.0, '': 0.0}	0	0.972656	0	1	key	key|target	0.8	TRUE	TRUE	TRUE	target	{'thailand': 0.8}
Factual Knowledge	capital_world	Kathmandu is to Nepal as Madrid is to	spain	Spain	0.94	1	1	{'Spain': 0.94, '______': 0.01, 'what': 0.0, '': 0.0, 'the': 0.0}	0	0.9375	0	1	key	key|target	0.8	TRUE	TRUE	TRUE	target	{'spain': 0.8}
Factual Knowledge	capital_world	Islamabad is to Pakistan as Athens is to	greece	Greece	0.94	1	1	{'Greece': 0.94, '__': 0.01, '______': 0.01, 'what': 0.0, '': 0.0}	0	0.9375	0	1	key	key|target	0.8	TRUE	TRUE	TRUE	target	{'greece': 0.8}
Factual Knowledge	capital_world	Georgetown is to Guyana as Madrid is to	spain	Spain	0.93	1	1	{'Spain': 0.93, '': 0.0, 'Cast': 0.0, '______': 0.0, 'the': 0.0}	0	0.933594	0	1	key	key|target	0.8	TRUE	TRUE	TRUE	target	{'spain': 0.8}
Factual Knowledge	capital_world	Warsaw is to Poland as Baghdad is to	iraq	Iraq	0.91	1	1	{'Iraq': 0.91, '______': 0.01, 'what': 0.01, 'Iran': 0.01, 'the': 0.01}	0	0.90625	0	1	key	key|target	0.8	TRUE	TRUE	TRUE	target	{'iraq': 0.8}
Factual Knowledge	country_capital	Moscow is to Russia as Ottawa is to	canada	Canada	0.89	1	1	{'Canada': 0.89, '__': 0.02, '______': 0.01, '_____': 0.01, '____': 0.0}	0	0.894531	0	1	key	key|target	0.8	TRUE	TRUE	TRUE	target	{'canada': 0.8}
Factual Knowledge	capital_world	Moscow is to Russia as Ottawa is to	canada	Canada	0.89	1	1	{'Canada': 0.89, '__': 0.02, '______': 0.01, '_____': 0.01, '____': 0.0}	0	0.894531	0	1	key	key|target	0.8	TRUE	TRUE	TRUE	target	{'canada': 0.8}
Factual Knowledge	capital_world	Windhoek is to Namibia as Bucharest is to	romania	Romania	0.89	1	1	{'Romania': 0.89, 'which': 0.02, 'what': 0.01, '______': 0.01, '__': 0.01}	0	0.886719	0	1	key	key|target	0.8	TRUE	TRUE	TRUE	target	{'romania': 0.8}
Factual Knowledge	capital_world	Caracas is to Venezuela as Kabul is to	afghanistan	Afghanistan	0.88	1	1	{'Afghanistan': 0.88, 'A': 0.02, '______': 0.01, '__': 0.01, 'what': 0.01}	0	0.875	0	1	key	key|target	0.8	TRUE	TRUE	TRUE	target	{'afghanistan': 0.8}
Factual Knowledge	capital_world	Baku is to Azerbaijan as Kathmandu is to	nepal	Nepal	0.87	1	1	{'Nepal': 0.87, '______': 0.02, '__': 0.01, 'Tibet': 0.01, 'what': 0.01}	0	0.867188	0	1	key	key|target	0.8	TRUE	TRUE	TRUE	target	{'nepal': 0.8}
Factual Knowledge	capital_world	Antananarivo is to Madagascar as Copenhagen is to	denmark	Denmark	0.86	1	1	{'Denmark': 0.86, '__': 0.01, 'Scandin': 0.01, '______': 0.01, 'Europe': 0.01}	0	0.863281	0	1	key	key|target	0.8	TRUE	TRUE	TRUE	target	{'denmark': 0.8}
Factual Knowledge	capital_world	Kingston is to Jamaica as Luanda is to	angola	Angola	0.84	1	1	{'Angola': 0.84, '__': 0.02, 'what': 0.02, '______': 0.01, 'which': 0.01}	0	0.839844	0	1	key	key|target	0.8	TRUE	TRUE	TRUE	target	{'angola': 0.8}
Factual Knowledge	capital_world	Helsinki is to Finland as Baghdad is to	iraq	Iraq	0.84	1	1	{'Iraq': 0.84, '______': 0.02, 'Iran': 0.01, 'what': 0.01, '__': 0.01}	0	0.84375	0	1	key	key|target	0.8	TRUE	TRUE	TRUE	target	{'iraq': 0.8}
Factual Knowledge	capital_world	Kiev is to Ukraine as Kigali is to	rwanda	Rwanda	0.82	1	1	{'Rwanda': 0.82, '': 0.02, 'what': 0.01, '______': 0.01, '__': 0.01}	0	0.816406	0	1	key	key|target	0.8	TRUE	TRUE	TRUE	target	{'rwanda': 0.8}
Factual Knowledge	country_capital	Copenhagen is to Denmark as Havana is to	cuba	Cuba	0.81	1	1	{'Cuba': 0.81, '______': 0.03, '__': 0.01, 'what': 0.01, '_____': 0.01}	0	0.8125	0	1	key	key|target	0.8	TRUE	TRUE	TRUE	target	{'cuba': 0.8}
Factual Knowledge	capital_world	Copenhagen is to Denmark as Havana is to	cuba	Cuba	0.81	1	1	{'Cuba': 0.81, '______': 0.03, '__': 0.01, 'what': 0.01, '_____': 0.01}	0	0.8125	0	1	key	key|target	0.8	TRUE	TRUE	TRUE	target	{'cuba': 0.8}
Factual Knowledge	country_capital	Helsinki is to Finland as Oslo is to	norway	Norway	0.79	1	1	{'Norway': 0.79, '______': 0.02, 'which': 0.02, '__': 0.01, 'Sweden': 0.01}	0	0.785156	0	1	key	key|target	0.8	TRUE	TRUE	TRUE	target	{'norway': 0.8}
Factual Knowledge	capital_world	Helsinki is to Finland as Oslo is to	norway	Norway	0.79	1	1	{'Norway': 0.79, '______': 0.02, 'which': 0.02, '__': 0.01, 'Sweden': 0.01}	0	0.785156	0	1	key	key|target	0.8	TRUE	TRUE	TRUE	target	{'norway': 0.8}
Factual Knowledge	capital_world	Berlin is to Germany as Kathmandu is to	nepal	Nepal	0.78	1	1	{'Nepal': 0.78, '______': 0.04, '__': 0.02, 'Tibet': 0.01, '_____': 0.01}	0	0.78125	0	1	key	key|target	0.8	TRUE	TRUE	TRUE	target	{'nepal': 0.8}
Factual Knowledge	name_occupation	andersen is to writer as pacino is to	actor	actor	0.77	1	1	{'actor': 0.77, 'the': 0.01, 'movie': 0.01, 'what': 0.01, 'director': 0.01}	0	0.773438	0	1	key	key|target	0.8	TRUE	TRUE	TRUE	target	{'actor': 0.8}
Factual Knowledge	capital_world	Bucharest is to Romania as Kathmandu is to	nepal	Nepal	0.77	1	1	{'Nepal': 0.77, '______': 0.03, '__': 0.03, '_____': 0.01, 'what': 0.01}	0	0.773438	0	1	key	key|target	0.8	TRUE	TRUE	TRUE	target	{'nepal': 0.8}
Factual Knowledge	capital_world	Tegucigalpa is to Honduras as Tehran is to	iran	Iran	0.76	1	1	{'Iran': 0.76, 'what': 0.04, '______': 0.03, '__': 0.02, '___': 0.01}	0	0.757812	0	1	key	key|target	0.8	TRUE	TRUE	TRUE	target	{'iran': 0.8}
Factual Knowledge	capital_world	Kiev is to Ukraine as Monrovia is to	liberia	Liberia	0.74	1	1	{'Liberia': 0.74, '__': 0.04, '______': 0.03, 'what': 0.03, '____': 0.02}	0	0.742188	0	1	key	key|target	0.8	TRUE	TRUE	TRUE	target	{'liberia': 0.8}
Factual Knowledge	country_capital	Canberra is to Australia as Havana is to	cuba	Cuba	0.71	1	1	{'Cuba': 0.71, '______': 0.05, '__': 0.03, 'what': 0.02, '_____': 0.02}	0	0.714844	0	1	key	key|target	0.8	TRUE	TRUE	TRUE	target	{'cuba': 0.8}
Factual Knowledge	capital_world	Ljubljana is to Slovenia as Mogadishu is to	somalia	Somalia	0.71	1	1	{'Somalia': 0.71, 'what': 0.03, '__': 0.03, '______': 0.02, '': 0.02}	0	0.707031	0	1	key	key|target	0.8	TRUE	TRUE	TRUE	target	{'somalia': 0.8}
Factual Knowledge	capital_world	Canberra is to Australia as Havana is to	cuba	Cuba	0.71	1	1	{'Cuba': 0.71, '______': 0.05, '__': 0.03, 'what': 0.02, '_____': 0.02}	0	0.714844	0	1	key	key|target	0.8	TRUE	TRUE	TRUE	target	{'cuba': 0.8}
Factual Knowledge	capital_world	Tunis is to Tunisia as Bern is to	switzerland	Switzerland	0.7	1	1	{'Switzerland': 0.7, 'what': 0.03, '______': 0.02, '__': 0.02, 'which': 0.01}	0	0.703125	0	1	key	key|target	0.8	TRUE	TRUE	TRUE	target	{'switzerland': 0.8}
Factual Knowledge	country_capital	Belgrade is to Serbia as London is to	england	England	0.67	1	1	{'England': 0.67, 'the': 0.09, 'Great': 0.06, 'Britain': 0.04, '______': 0.03}	0	0.671875	0	1	key	key|target	0.8	TRUE	TRUE	TRUE	target	{'england': 0.8}
Factual Knowledge	capital_world	Dublin is to Ireland as Muscat is to	oman	Oman	0.67	1	1	{'Oman': 0.67, '_____': 0.03, '______': 0.03, '__': 0.03, 'what': 0.02}	0	0.667969	0	1	key	key|target	0.8	TRUE	TRUE	TRUE	target	{'oman': 0.8}
Factual Knowledge	country_capital	Belgium is to Brussels as Taiwan is to	taipei	Taipei	0.66	1	1	{'Taipei': 0.66, '__': 0.04, '______': 0.04, 'Taiwan': 0.02, '...': 0.02}	0	0.660156	0	1	key	key|target	0.8	TRUE	TRUE	TRUE	target	{'taipei': 0.8}
Factual Knowledge	capital_world	Valletta is to Malta as Belmopan is to	belize	Belize	0.66	1	1	{'Belize': 0.66, 'what': 0.09, 'which': 0.04, '______': 0.02, '?': 0.02}	0	0.65625	0	1	key	key|target	0.8	TRUE	TRUE	TRUE	target	{'belize': 0.8}
Factual Knowledge	country_capital	Islamabad is to Pakistan as Jakarta is to	indonesia	Indonesia	0.62	1	1	{'Indonesia': 0.62, 'what': 0.05, '(': 0.03, ':': 0.03, '______': 0.03}	0	0.617188	0	1	key	key|target	0.8	TRUE	TRUE	TRUE	target	{'indonesia': 0.8}
Factual Knowledge	name_occupation	spinoza is to philosopher as tolstoi is to	novelist	novelist	0.62	1	1	{'novelist': 0.62, 'writer': 0.12, 'fiction': 0.04, 'the': 0.03, 'novel': 0.03}	0	0.621094	0	1	key	key|target	0.8	TRUE	TRUE	TRUE	target	{'novelist': 0.8}
Factual Knowledge	capital_world	Islamabad is to Pakistan as Jakarta is to	indonesia	Indonesia	0.62	1	1	{'Indonesia': 0.62, 'what': 0.05, '(': 0.03, ':': 0.03, '______': 0.03}	0	0.617188	0	1	key	key|target	0.8	TRUE	TRUE	TRUE	target	{'indonesia': 0.8}
Factual Knowledge	country_language	Ecuador is to Spanish as Netherlands is to	dutch	Dutch	0.61	1	1	{'Dutch': 0.61, '______': 0.04, ':': 0.03, '': 0.02, '__': 0.01}	0	0.605469	0	1	key	key|target	0.8	TRUE	TRUE	TRUE	target	{'dutch': 0.8}
Factual Knowledge	capital_world	Caracas is to Venezuela as Islamabad is to	pakistan	Pakistan	0.61	1	1	{'Pakistan': 0.61, '______': 0.07, '__': 0.03, ':': 0.03, 'what': 0.03}	0	0.609375	0	1	key	key|target	0.8	TRUE	TRUE	TRUE	target	{'pakistan': 0.8}
Factual Knowledge	country_capital	Stockholm is to Sweden as Vienna is to	austria	Austria	0.58	1	1	{'Austria': 0.58, '______': 0.07, 'what': 0.04, '__': 0.04, '_____': 0.02}	0	0.582031	0	1	key	key|target	0.8	TRUE	TRUE	TRUE	target	{'austria': 0.8}
Factual Knowledge	country_capital	Iraq is to Baghdad as Jamaica is to	kingston	Kingston	0.58	1	1	{'Kingston': 0.58, ':': 0.03, '"': 0.02, '__': 0.02, 'Mont': 0.02}	0	0.582031	0	1	key	key|target	0.8	TRUE	TRUE	TRUE	target	{'kingston': 0.8}
Factual Knowledge	capital_world	Stockholm is to Sweden as Vienna is to	austria	Austria	0.58	1	1	{'Austria': 0.58, '______': 0.07, 'what': 0.04, '__': 0.04, '_____': 0.02}	0	0.582031	0	1	key	key|target	0.8	TRUE	TRUE	TRUE	target	{'austria': 0.8}
Factual Knowledge	capital_world	Georgetown is to Guyana as Khartoum is to	sudan	Sudan	0.5	1	1	{'Sudan': 0.5, '__': 0.09, '______': 0.05, 'what': 0.05, 'the': 0.04}	0	0.503906	0	1	key	key|target	0.8	TRUE	TRUE	TRUE	target	{'sudan': 0.8}
Factual Knowledge	country_capital	Philippines is to Manila as Norway is to	oslo	Oslo	0.48	1	1	{'Oslo': 0.48, '______': 0.07, '__': 0.03, '____': 0.03, '_____': 0.02}	0	0.484375	0	1	key	key|target	0.8	TRUE	TRUE	TRUE	target	{'oslo': 0.8}
Factual Knowledge	capital_world	Ottawa is to Canada as Tallinn is to	estonia	Estonia	0.48	1	1	{'Estonia': 0.48, 'which': 0.08, 'what': 0.07, '______': 0.04, '__': 0.03}	0	0.484375	0	1	key	key|target	0.8	TRUE	TRUE	TRUE	target	{'estonia': 0.8}
Factual Knowledge	capital_world	Philippines is to Manila as Norway is to	oslo	Oslo	0.48	1	1	{'Oslo': 0.48, '______': 0.07, '__': 0.03, '____': 0.03, '_____': 0.02}	0	0.484375	0	1	key	key|target	0.8	TRUE	TRUE	TRUE	target	{'oslo': 0.8}
Factual Knowledge	capital_world	Paris is to France as Hanoi is to	vietnam	Vietnam	0.47	1	1	{'Vietnam': 0.47, '______': 0.07, 'what': 0.06, 'Viet': 0.04, '_____': 0.03}	0	0.474609	0	1	key	key|target	0.8	TRUE	TRUE	TRUE	target	{'vietnam': 0.8}
Factual Knowledge	name_occupation	pascal is to mathematician as wittgenstein is to	philosopher	philosopher	0.46	1	1	{'philosopher': 0.46, '?': 0.04, '...': 0.03, '______': 0.02, 'logic': 0.02}	0	0.464844	0	1	key	key|target	0.8	TRUE	TRUE	TRUE	target	{'philosopher': 0.8}
Factual Knowledge	name_occupation	caesar is to emperor as mozart is to	composer	composer	0.44	1	1	{'composer': 0.44, 'musician': 0.07, 'pian': 0.03, 'what': 0.02, '______': 0.02}	0	0.4375	0	1	key	key|target	0.8	TRUE	TRUE	TRUE	target	{'composer': 0.8}
Factual Knowledge	name_occupation	locke is to philosopher as moses is to	prophet	prophet	0.4	1	1	{'prophet': 0.4, 'religious': 0.07, 'religion': 0.04, 'law': 0.03, 'the': 0.02}	0	0.400391	0	1	key	key|target	0.8	TRUE	TRUE	TRUE	target	{'prophet': 0.8}
Factual Knowledge	country_capital	Belgium is to Brussels as Egypt is to	cairo	Cairo	0.39	1	1	{'Cairo': 0.39, '__': 0.06, '______': 0.05, ':': 0.03}	0	0.386719	0	1	key	key|target	0.8	TRUE	TRUE	TRUE	target	{'cairo': 0.8}
Factual Knowledge	capital_world	Tunis is to Tunisia as Vilnius is to	lithuania	Lithuania	0.39	1	1	{'Lithuania': 0.39, 'what': 0.11, 'which': 0.08, '______': 0.04, '__': 0.03}	0	0.394531	0	1	key	key|target	0.8	TRUE	TRUE	TRUE	target	{'lithuania': 0.8}
Factual Knowledge	capital_world	Belgium is to Brussels as Egypt is to	cairo	Cairo	0.39	1	1	{'Cairo': 0.39, '__': 0.06, '______': 0.05, ':': 0.03}	0	0.386719	0	1	key	key|target	0.8	TRUE	TRUE	TRUE	target	{'cairo': 0.8}
Factual Knowledge	country_language	Bolivia is to Spanish as Cyprus is to	greek	Greek	0.37	1	1	{'Greek': 0.37, 'English': 0.14, 'Turkish': 0.13, '______': 0.07, '__': 0.03}	0	0.369141	0	1	key	key|target	0.8	TRUE	TRUE	TRUE	target	{'greek': 0.8}
Factual Knowledge	capital_world	Laos is to Vientiane as Thailand is to	bangkok	Bangkok	0.37	1	1	{'Bangkok': 0.37, 'what': 0.06, '______': 0.04, '__': 0.04, '_____': 0.03}	0	0.373047	0	1	key	key|target	0.8	TRUE	TRUE	TRUE	target	{'bangkok': 0.8}
Factual Knowledge	name_occupation	hume is to philosopher as lincoln is to	president	president	0.37	1	1	{'president': 0.37, 'politician': 0.17, 'lawyer': 0.05, 'states': 0.05, '______': 0.02}	0	0.365234	0	1	key	key|target	0.8	TRUE	TRUE	TRUE	target	{'president': 0.8}
Factual Knowledge	capital_world	Azerbaijan is to Baku as Syria is to	damascus	Damascus	0.34	1	1	{'Damascus': 0.34, '__': 0.12, '______': 0.11, ':': 0.05, '____': 0.03}	0	0.335938	0	1	key	key|target	0.8	TRUE	TRUE	TRUE	target	{'damascus': 0.8}
Factual Knowledge	name_occupation	truman is to president as wittgenstein is to	philosopher	philosopher	0.31	1	1	{'philosopher': 0.31, 'what': 0.04, 'lingu': 0.03, '___': 0.03, '_': 0.03}	0	0.308594	0	1	key	key|target	0.8	TRUE	TRUE	TRUE	target	{'philosopher': 0.8}
Factual Knowledge	capital_world	Tallinn is to Estonia as Yerevan is to	armenia	Armenia	0.3	1	1	{'Armenia': 0.3, 'what': 0.1, '__': 0.08, 'which': 0.07, '____': 0.05}	0	0.304688	0	1	key	key|target	0.8	TRUE	TRUE	TRUE	target	{'armenia': 0.8}
Factual Knowledge	name_occupation	dickens is to novelist as shakespeare is to	playwright	playwright	0.29	1	1	{'playwright': 0.29, '____': 0.04, 'poet': 0.03, 'what': 0.03, 'dram': 0.03}	0	0.294922	0	1	key	key|target	0.8	TRUE	TRUE	TRUE	target	{'playwright': 0.8}
Factual Knowledge	capital_world	Zagreb is to Croatia as Abuja is to	nigeria	Nigeria	0.29	1	1	{'Nigeria': 0.29, '______': 0.13, '__': 0.09, '____': 0.05, '___': 0.04}	0	0.289062	0	1	key	key|target	0.8	TRUE	TRUE	TRUE	target	{'nigeria': 0.8}
Factual Knowledge	country_capital	Australia is to Canberra as Norway is to	oslo	Oslo	0.27	1	1	{'Oslo': 0.27, '______': 0.07, 'A': 0.05, '?': 0.04, '__': 0.04}	0	0.271484	0	1	key	key|target	0.8	TRUE	TRUE	TRUE	target	{'oslo': 0.8}
Factual Knowledge	country_capital	Serbia is to Belgrade as Cuba is to	havana	Havana	0.27	1	1	{'Havana': 0.27, '______': 0.13, '__': 0.08, ':': 0.06, '_____': 0.04}	0	0.265625	0	1	key	key|target	0.8	TRUE	TRUE	TRUE	target	{'havana': 0.8}
Factual Knowledge	capital_world	France is to Paris as Norway is to	oslo	Oslo	0.27	1	1	{'Oslo': 0.27, 'A': 0.09, '______': 0.07, 'what': 0.03, '__': 0.03}	0	0.267578	0	1	key	key|target	0.8	TRUE	TRUE	TRUE	target	{'oslo': 0.8}
Factual Knowledge	capital_world	Australia is to Canberra as Norway is to	oslo	Oslo	0.27	1	1	{'Oslo': 0.27, '______': 0.07, 'A': 0.05, '?': 0.04, '__': 0.04}	0	0.271484	0	1	key	key|target	0.8	TRUE	TRUE	TRUE	target	{'oslo': 0.8}
Factual Knowledge	capital_world	Serbia is to Belgrade as Cuba is to	havana	Havana	0.27	1	1	{'Havana': 0.27, '______': 0.13, '__': 0.08, ':': 0.06, '_____': 0.04}	0	0.265625	0	1	key	key|target	0.8	TRUE	TRUE	TRUE	target	{'havana': 0.8}
Factual Knowledge	capital_world	Germany is to Berlin as Thailand is to	bangkok	Bangkok	0.26	1	1	{'Bangkok': 0.26, '______': 0.1, '__': 0.08, '_____': 0.05, 'what': 0.03}	0	0.257812	0	1	key	key|target	0.8	TRUE	TRUE	TRUE	target	{'bangkok': 0.8}
Factual Knowledge	country_capital	Kenya is to Nairobi as Poland is to	warsaw	Warsaw	0.24	1	1	{'Warsaw': 0.24, '______': 0.12, '_____': 0.05, '__': 0.04, ':': 0.03}	0	0.240234	0	1	key	key|target	0.8	TRUE	TRUE	TRUE	target	{'warsaw': 0.8}
Factual Knowledge	capital_world	Kenya is to Nairobi as Poland is to	warsaw	Warsaw	0.24	1	1	{'Warsaw': 0.24, '______': 0.12, '_____': 0.05, '__': 0.04, ':': 0.03}	0	0.240234	0	1	key	key|target	0.8	TRUE	TRUE	TRUE	target	{'warsaw': 0.8}
Factual Knowledge	capital_world	Venezuela is to Caracas as Ireland is to	dublin	Dublin	0.23	1	1	{'Dublin': 0.23, '______': 0.12, ':': 0.07, '__': 0.06, '____': 0.04}	0	0.233398	0	1	key	key|target	0.8	TRUE	TRUE	TRUE	target	{'dublin': 0.8}
Factual Knowledge	country_capital	Budapest is to Hungary as Damascus is to	syria	Syria	0.2	1	1	{'Syria': 0.2, 'what': 0.15, ':': 0.06, 'which': 0.05, '______': 0.05}	0	0.201172	0	1	key	key|target	0.8	TRUE	TRUE	TRUE	target	{'syria': 0.8}
Factual Knowledge	name_nationality	lenin is to Soviet as wagner is to	german	German	0.2	1	1	{'German': 0.2, 'german': 0.16, 'n': 0.05, 'Germany': 0.05, 'germany': 0.04}	0	0.204102	0	1	key	key|target	0.8	TRUE	TRUE	TRUE	target	{'german': 0.8}
Factual Knowledge	capital_world	Budapest is to Hungary as Damascus is to	syria	Syria	0.2	1	1	{'Syria': 0.2, 'what': 0.15, ':': 0.06, 'which': 0.05, '______': 0.05}	0	0.201172	0	1	key	key|target	0.8	TRUE	TRUE	TRUE	target	{'syria': 0.8}
Factual Knowledge	capital_world	Uruguay is to Montevideo as Italy is to	rome	Rome	0.2	1	1	{'Rome': 0.2, '______': 0.08, '__': 0.08, ':': 0.05, 'what': 0.04}	0	0.196289	0	1	key	key|target	0.8	TRUE	TRUE	TRUE	target	{'rome': 0.8}
Factual Knowledge	country_capital	Pakistan is to Islamabad as Sweden is to	stockholm	Stockholm	0.19	1	1	{'Stockholm': 0.19, '______': 0.08, ':': 0.07, '_____': 0.04}	0	0.186523	0	1	key	key|target	0.8	TRUE	TRUE	TRUE	target	{'stockholm': 0.8}
Factual Knowledge	capital_world	Pakistan is to Islamabad as Sweden is to	stockholm	Stockholm	0.19	1	1	{'Stockholm': 0.19, '______': 0.08, ':': 0.07, '_____': 0.04}	0	0.186523	0	1	key	key|target	0.8	TRUE	TRUE	TRUE	target	{'stockholm': 0.8}
Factual Knowledge	name_nationality	aristotle is to Greek as caesar is to	roman	Roman	0.18	1	1	{'Roman': 0.18, 'roman': 0.16, 'Latin': 0.09, 'latin': 0.04, '': 0.02}	0	0.182617	0	1	key	key|target	0.8	TRUE	TRUE	TRUE	target	{'roman': 0.8}
Factual Knowledge	name_occupation	kant is to philosopher as strauss is to	composer	composer	0.14	1	1	{'composer': 0.14, 'political': 0.11, 'musician': 0.09, 'philosopher': 0.07, 'politician': 0.05}	0	0.135742	0	1	key	key|target	0.8	TRUE	TRUE	TRUE	target	{'composer': 0.8}
Factual Knowledge	capital_world	Nicaragua is to Managua as Philippines is to	manila	______	0.14	0	1	{'______': 0.14, '': 0.09, 'Manila': 0.06, '____': 0.06, '__': 0.06}	3	0.0634766	0.0800781	0.99997	key	key|target	0.8	TRUE	TRUE	TRUE	target	{'manila': 0.8}
Factual Knowledge	country_capital	Baghdad is to Iraq as Oslo is to	norway	Norway	0.13	1	1	{'Norway': 0.13, '______': 0.11, '__': 0.06, 'what': 0.05, '____': 0.05}	0	0.133789	0	1	key	key|target	0.8	TRUE	TRUE	TRUE	target	{'norway': 0.8}
Factual Knowledge	country_capital	Jamaica is to Kingston as Philippines is to	manila	______	0.13	0	1	{'______': 0.13, '____': 0.08, '__': 0.06, '_____': 0.06, 'Manila': 0.05}	4	0.0527344	0.0732422	0.99996	key	key|target	0.8	TRUE	TRUE	TRUE	target	{'manila': 0.8}
Factual Knowledge	capital_world	Baghdad is to Iraq as Oslo is to	norway	Norway	0.13	1	1	{'Norway': 0.13, '______': 0.11, '__': 0.06, 'what': 0.05, '____': 0.05}	0	0.133789	0	1	key	key|target	0.8	TRUE	TRUE	TRUE	target	{'norway': 0.8}
Factual Knowledge	capital_world	Jamaica is to Kingston as Philippines is to	manila	______	0.13	0	1	{'______': 0.13, '____': 0.08, '__': 0.06, '_____': 0.06, 'Manila': 0.05}	4	0.0527344	0.0732422	0.99996	key	key|target	0.8	TRUE	TRUE	TRUE	target	{'manila': 0.8}
Factual Knowledge	capital_world	Dhaka is to Bangladesh as Kigali is to	rwanda	Rwanda	0.12	1	1	{'Rwanda': 0.12, '______': 0.08, '__': 0.07, 'which': 0.06, ':': 0.05}	0	0.123535	0	1	key	key|target	0.8	TRUE	TRUE	TRUE	target	{'rwanda': 0.8}
Factual Knowledge	country_capital	Nigeria is to Abuja as China is to	beijing	Beijing	0.09	1	1	{'Beijing': 0.09, '?': 0.04, '______': 0.06, ':': 0.04}	0	0.0854492	0	1	key	key|target	0.8	TRUE	TRUE	TRUE	target	{'beijing': 0.8}
Factual Knowledge	capital_world	Nigeria is to Abuja as China is to	beijing	Beijing	0.09	1	1	{'Beijing': 0.09, '?': 0.04, '______': 0.06, ':': 0.04}	0	0.0854492	0	1	key	key|target	0.8	TRUE	TRUE	TRUE	target	{'beijing': 0.8}
Factual Knowledge	capital_world	Rwanda is to Kigali as Portugal is to	lisbon	Lisbon	0.08	1	1	{'Lisbon': 0.08, '______': 0.08, '__': 0.07, '': 0.05, ':': 0.05}	0	0.0834961	0	1	key	key|target	0.8	TRUE	TRUE	TRUE	target	{'lisbon': 0.8}
Factual Knowledge	name_occupation	aristotle is to philosopher as hawking is to	physicist	physicist	0.07	1	1	{'physicist': 0.07, '?': 0.06, '': 0.06, 'scientist': 0.06, 'what': 0.05}	0	0.0732422	0	1	key	key|target	0.8	TRUE	TRUE	TRUE	target	{'physicist': 0.8}
Factual Knowledge	capital_world	Skopje is to Macedonia as Asmara is to	eritrea	E	0.92	0.5	0.5	{'E': 0.92, '': 0.01, 'Ethiopia': 0.01, 'the': 0.01, 'what': 0.01}	17	0.000740051	0.921135	0.999831	key	key|target	0.8	TRUE	TRUE	TRUE	target	{'eritrea': 0.8}
Factual Knowledge	capital_world	France is to Paris as Honduras is to	tegucigalpa	T	0.36	0.5	0.5	{'T': 0.36, '______': 0.12, '__': 0.07, 'San': 0.04, 'what': 0.02}	26	0.00421143	0.351257	0.999741	key	key|target	0.8	TRUE	TRUE	TRUE	target	{'tegucigalpa': 0.8}
Factual Knowledge	UK_city_county	bradford is to yorkshire as liverpool is to	lancashire	lanc	0.34	0.5	0.5	{'lanc': 0.34, 'mer': 0.26, 'eng': 0.07, 'liver': 0.05, '': 0.02}	0	0.335938	0	1	key	key|target	0.8	TRUE	TRUE	TRUE	target	{'lancashire': 0.8}
Factual Knowledge	capital_world	Madagascar is to Antananarivo as Zimbabwe is to	harare	Har	0.33	0.5	0.5	{'Har': 0.33, '______': 0.1, '__': 0.06, ':': 0.03, '_____': 0.03}	0	0.328125	0	1	key	key|target	0.8	TRUE	TRUE	TRUE	target	{'harare': 0.8}
Factual Knowledge	country_capital	Germany is to Berlin as Vietnam is to	hanoi	H	0.27	0.5	0.5	{'H': 0.27, 'Ho': 0.25, 'Sa': 0.13, '______': 0.06, 'Vietnam': 0.02}	35	0.00179291	0.263832	0.999651	key	key|target	0.8	TRUE	TRUE	TRUE	target	{'hanoi': 0.8}
Factual Knowledge	capital_world	Germany is to Berlin as Vietnam is to	hanoi	H	0.27	0.5	0.5	{'H': 0.27, 'Ho': 0.25, 'Sa': 0.13, '______': 0.06, 'Vietnam': 0.02}	35	0.00179291	0.263832	0.999651	key	key|target	0.8	TRUE	TRUE	TRUE	target	{'hanoi': 0.8}
Factual Knowledge	capital_world	Chile is to Santiago as Armenia is to	yerevan	Y	0.22	0.5	0.5	{'Y': 0.22, '__': 0.1, '______': 0.06, '____': 0.04, '?': 0.04}	1349	6.58631e-06	0.220697	0.986557	key	key|target	0.8	TRUE	TRUE	TRUE	target	{'yerevan': 0.8}
Factual Knowledge	capital_world	Armenia is to Yerevan as Belize is to	belmopan	Bel	0.2	0.5	0.5	{'Bel': 0.2, '______': 0.08, '__': 0.07, 'Belize': 0.07, ':': 0.07}	0	0.200195	0	1	key	key|target	0.8	TRUE	TRUE	TRUE	target	{'belmopan': 0.8}
Factual Knowledge	capital_world	Skopje is to Macedonia as Banjul is to	gambia	G	0.2	0.5	0.5	{'G': 0.2, 'The': 0.13, 'the': 0.11, '__': 0.05, '___': 0.04}	90	0.000486374	0.195803	0.999103	key	key|target	0.8	TRUE	TRUE	TRUE	target	{'gambia': 0.8}
Factual Knowledge	country_capital	Belgium is to Brussels as Romania is to	bucharest	Buch	0.19	0.5	0.5	{'Buch': 0.19, '______': 0.08, '__': 0.06, ':': 0.04}	0	0.194336	0	1	key	key|target	0.8	TRUE	TRUE	TRUE	target	{'bucharest': 0.8}
Factual Knowledge	capital_world	Belgium is to Brussels as Romania is to	bucharest	Buch	0.19	0.5	0.5	{'Buch': 0.19, '______': 0.08, '__': 0.06, ':': 0.04}	0	0.194336	0	1	key	key|target	0.8	TRUE	TRUE	TRUE	target	{'bucharest': 0.8}
Factual Knowledge	name_occupation	columbus is to explorer as euler is to	mathematician	mathematic	0.17	0.5	0.5	{'mathematic': 0.17, '': 0.04, ':': 0.04, '___': 0.03, '"': 0.03}	0	0.169922	0	1	key	key|target	0.8	TRUE	TRUE	TRUE	target	{'mathematician': 0.8}
Factual Knowledge	capital_world	Bratislava is to Slovakia as Georgetown is to	guyana	Guy	0.16	0.5	0.5	{'Guy': 0.16, 'the': 0.14, 'Washington': 0.08, 'what': 0.07, 'Malaysia': 0.07}	0	0.158203	0	1	key	key|target	0.8	TRUE	TRUE	TRUE	target	{'guyana': 0.8}
Factual Knowledge	capital_world	Afghanistan is to Kabul as Latvia is to	riga	R	0.13	0.5	0.5	{'R': 0.13, '?': 0.07, 'what': 0.07, ':': 0.03}	175	0.000272751	0.128633	0.998256	key	key|target	0.8	TRUE	TRUE	TRUE	target	{'riga': 0.8}
Factual Knowledge	capital_world	Gambia is to Banjul as Romania is to	bucharest	Buch	0.13	0.5	0.5	{'Buch': 0.13, ':': 0.04, '______': 0.06}	0	0.128906	0	1	key	key|target	0.8	TRUE	TRUE	TRUE	target	{'bucharest': 0.8}
Factual Knowledge	capital_world	Guyana is to Georgetown as Uganda is to	kampala	______	0.11	0	0.5	{'______': 0.11, 'Kamp': 0.07, '?': 0.05, '': 0.07}	1	0.074707	0.0341797	0.99999	key	key|target	0.8	TRUE	TRUE	TRUE	target	{'kampala': 0.8}
Factual Knowledge	capital_world	Nepal is to Kathmandu as Mozambique is to	maputo	__	0.1	0	0.5	{'__': 0.1, 'Map': 0.09, '______': 0.07, '"': 0.05, ':': 0.04}	1	0.09375	0.00634766	0.99999	key	key|target	0.8	TRUE	TRUE	TRUE	target	{'maputo': 0.8}
Factual Knowledge	capital_world	Uzbekistan is to Tashkent as Kazakhstan is to	astana	A	0.08	0.5	0.5	{'A': 0.08, '"': 0.08, '?': 0.05, '': 0.05, 'what': 0.04}	5	0.0415039	0.0361328	0.99995	key	key|target	0.8	TRUE	TRUE	TRUE	target	{'astana': 0.8}
Factual Knowledge	capital_world	Berlin is to Germany as Georgetown is to	guyana	Washington	0.37	0	0	{'Washington': 0.37, 'the': 0.3, 'D': 0.1, 'DC': 0.07, 'America': 0.02}	77	0.000274658	0.366913	0.999233	key	key|target	0.8	TRUE	TRUE	TRUE	target	{'guyana': 0.8}
Factual Knowledge	capital_world	Cairo is to Egypt as Georgetown is to	guyana	the	0.36	0	0	{'the': 0.36, 'Washington': 0.34, 'D': 0.06, 'DC': 0.03, 'what': 0.03}	37	0.00109863	0.356323	0.999631	key	key|target	0.8	TRUE	TRUE	TRUE	target	{'guyana': 0.8}
Factual Knowledge	UK_city_county	bradford is to yorkshire as coventry is to	midlands	war	0.21	0	0	{'war': 0.21, 'west': 0.15, 'the': 0.09, '______': 0.04, 'what': 0.03}	1585	8.64267e-06	0.207023	0.984206	key	key|target	0.8	TRUE	TRUE	TRUE	target	{'midlands': 0.8}
Factual Knowledge	UK_city_county	leeds is to yorkshire as newport is to	gwent	w	0.17	0	0	{'w': 0.17, 'glam': 0.1, 'som': 0.1, 'mon': 0.08, 'south': 0.07}	119	0.00037384	0.164665	0.998814	key	key|target	0.8	TRUE	TRUE	TRUE	target	{'gwent': 0.8}
Factual Knowledge	capital_world	Warsaw is to Poland as Damascus is to	syria	Syria	0.96	1	1	{'Syria': 0.96, '': 0.01, 'the': 0.01, 'what': 0.0, '______': 0.0}	0	0.964844	0	1	key	key|target	0.79	TRUE	TRUE	TRUE	target	{'syria': 0.79}
Factual Knowledge	country_capital	Bucharest is to Romania as Havana is to	cuba	Cuba	0.93	1	1	{'Cuba': 0.93, '______': 0.01, '': 0.01, 'the': 0.01, 'what': 0.0}	0	0.933594	0	1	key	key|target	0.79	TRUE	TRUE	TRUE	target	{'cuba': 0.79}
Factual Knowledge	country_capital	Kiev is to Ukraine as Ottawa is to	canada	Canada	0.93	1	1	{'Canada': 0.93, '__': 0.02, '______': 0.01, '_____': 0.0, '____': 0.0}	0	0.929688	0	1	key	key|target	0.79	TRUE	TRUE	TRUE	target	{'canada': 0.79}
Factual Knowledge	capital_world	Kiev is to Ukraine as Ottawa is to	canada	Canada	0.93	1	1	{'Canada': 0.93, '__': 0.02, '______': 0.01, '_____': 0.0, '____': 0.0}	0	0.929688	0	1	key	key|target	0.79	TRUE	TRUE	TRUE	target	{'canada': 0.79}
Factual Knowledge	capital_world	Bucharest is to Romania as Havana is to	cuba	Cuba	0.93	1	1	{'Cuba': 0.93, '______': 0.01, '': 0.01, 'the': 0.01, 'what': 0.0}	0	0.933594	0	1	key	key|target	0.79	TRUE	TRUE	TRUE	target	{'cuba': 0.79}
Factual Knowledge	country_capital	Havana is to Cuba as Lisbon is to	portugal	Portugal	0.89	1	1	{'Portugal': 0.89, '__': 0.01, 'what': 0.01, '______': 0.01, '': 0.01}	0	0.894531	0	1	key	key|target	0.79	TRUE	TRUE	TRUE	target	{'portugal': 0.79}
Factual Knowledge	capital_world	Havana is to Cuba as Lisbon is to	portugal	Portugal	0.89	1	1	{'Portugal': 0.89, '__': 0.01, 'what': 0.01, '______': 0.01, '': 0.01}	0	0.894531	0	1	key	key|target	0.79	TRUE	TRUE	TRUE	target	{'portugal': 0.79}
Factual Knowledge	country_capital	Beirut is to Lebanon as Jakarta is to	indonesia	Indonesia	0.87	1	1	{'Indonesia': 0.87, 'what': 0.01, 'Java': 0.01, '______': 0.01, '__': 0.01}	0	0.867188	0	1	key	key|target	0.79	TRUE	TRUE	TRUE	target	{'indonesia': 0.79}
Factual Knowledge	country_capital	Kiev is to Ukraine as Vienna is to	austria	Austria	0.87	1	1	{'Austria': 0.87, '______': 0.02, 'the': 0.01, '__': 0.01, 'what': 0.01}	0	0.867188	0	1	key	key|target	0.79	TRUE	TRUE	TRUE	target	{'austria': 0.79}
Factual Knowledge	capital_world	Beirut is to Lebanon as Jakarta is to	indonesia	Indonesia	0.87	1	1	{'Indonesia': 0.87, 'what': 0.01, 'Java': 0.01, '______': 0.01, '__': 0.01}	0	0.867188	0	1	key	key|target	0.79	TRUE	TRUE	TRUE	target	{'indonesia': 0.79}
Factual Knowledge	capital_world	Suva is to Fiji as Tunis is to	tunisia	Tunisia	0.86	1	1	{'Tunisia': 0.86, 'North': 0.03, 'Tunis': 0.01, 'the': 0.01, 'Libya': 0.01}	0	0.863281	0	1	key	key|target	0.79	TRUE	TRUE	TRUE	target	{'tunisia': 0.79}
Factual Knowledge	capital_world	Quito is to Ecuador as Tehran is to	iran	Iran	0.78	1	1	{'Iran': 0.78, 'what': 0.02, '______': 0.02, '__': 0.02, ':': 0.01}	0	0.777344	0	1	key	key|target	0.79	TRUE	TRUE	TRUE	target	{'iran': 0.79}
Factual Knowledge	country_capital	Belgrade is to Serbia as Manila is to	philippines	the	0.75	0	1	{'the': 0.75, 'Philippines': 0.06, '______': 0.04, '__': 0.02, 'The': 0.01}	1	0.0598145	0.690186	0.99999	key	key|target	0.79	TRUE	TRUE	TRUE	target	{'philippines': 0.79}
Factual Knowledge	capital_world	Manama is to Bahrain as Tripoli is to	libya	Libya	0.73	1	1	{'Libya': 0.73, '______': 0.03, '__': 0.03, ':': 0.03, 'what': 0.02}	0	0.726562	0	1	key	key|target	0.79	TRUE	TRUE	TRUE	target	{'libya': 0.79}
Factual Knowledge	capital_world	Stockholm is to Sweden as London is to	england	England	0.68	1	1	{'England': 0.68, 'the': 0.1, 'Great': 0.06, 'Britain': 0.04, '______': 0.02}	0	0.679688	0	1	key	key|target	0.79	TRUE	TRUE	TRUE	target	{'england': 0.79}
Factual Knowledge	capital_world	Havana is to Cuba as Minsk is to	belarus	Belarus	0.66	1	1	{'Belarus': 0.66, 'what': 0.05, '______': 0.03, 'which': 0.03, '__': 0.01}	0	0.664062	0	1	key	key|target	0.79	TRUE	TRUE	TRUE	target	{'belarus': 0.79}
Factual Knowledge	country_capital	Conakry is to Guinea as London is to	england	England	0.63	1	1	{'England': 0.63, 'the': 0.13, 'Great': 0.07, 'Britain': 0.04, '______': 0.02}	0	0.628906	0	1	key	key|target	0.79	TRUE	TRUE	TRUE	target	{'england': 0.79}
Factual Knowledge	country_capital	Ukraine is to Kiev as Japan is to	tokyo	Tokyo	0.63	1	1	{'Tokyo': 0.63, '______': 0.04, '__': 0.03, '____': 0.02, '_____': 0.02}	0	0.632812	0	1	key	key|target	0.79	TRUE	TRUE	TRUE	target	{'tokyo': 0.79}
Factual Knowledge	capital_world	Taipei is to Taiwan as Abuja is to	nigeria	Nigeria	0.63	1	1	{'Nigeria': 0.63, '______': 0.06, '__': 0.05, 'what': 0.03, '_____': 0.03}	0	0.632812	0	1	key	key|target	0.79	TRUE	TRUE	TRUE	target	{'nigeria': 0.79}
Factual Knowledge	capital_world	Conakry is to Guinea as London is to	england	England	0.63	1	1	{'England': 0.63, 'the': 0.13, 'Great': 0.07, 'Britain': 0.04, '______': 0.02}	0	0.628906	0	1	key	key|target	0.79	TRUE	TRUE	TRUE	target	{'england': 0.79}
Factual Knowledge	country_capital	Canberra is to Australia as Lisbon is to	portugal	Portugal	0.62	1	1	{'Portugal': 0.62, 'what': 0.04, '______': 0.03, '__': 0.03, 'which': 0.03}	0	0.625	0	1	key	key|target	0.79	TRUE	TRUE	TRUE	target	{'portugal': 0.79}
Factual Knowledge	capital_world	Canberra is to Australia as Lisbon is to	portugal	Portugal	0.62	1	1	{'Portugal': 0.62, 'what': 0.04, '______': 0.03, '__': 0.03, 'which': 0.03}	0	0.625	0	1	key	key|target	0.79	TRUE	TRUE	TRUE	target	{'portugal': 0.79}
Factual Knowledge	capital_world	Dakar is to Senegal as Dublin is to	ireland	Ireland	0.61	1	1	{'Ireland': 0.61, '______': 0.08, '__': 0.04, ':': 0.03, '____': 0.03}	0	0.609375	0	1	key	key|target	0.79	TRUE	TRUE	TRUE	target	{'ireland': 0.79}
Factual Knowledge	name_occupation	dante is to poet as wittgenstein is to	philosopher	philosopher	0.6	1	1	{'philosopher': 0.6, 'what': 0.02, '?': 0.02, '...': 0.02, '______': 0.01}	0	0.601562	0	1	key	key|target	0.79	TRUE	TRUE	TRUE	target	{'philosopher': 0.79}
Factual Knowledge	capital_world	Quito is to Ecuador as Riga is to	latvia	Latvia	0.6	1	1	{'Latvia': 0.6, 'what': 0.05, ':': 0.03, '______': 0.03, 'which': 0.03}	0	0.597656	0	1	key	key|target	0.79	TRUE	TRUE	TRUE	target	{'latvia': 0.79}
Factual Knowledge	capital_world	Paris is to France as Kabul is to	afghanistan	Afghanistan	0.6	1	1	{'Afghanistan': 0.6, 'what': 0.06, '______': 0.03, '__': 0.02, 'A': 0.02}	0	0.601562	0	1	key	key|target	0.79	TRUE	TRUE	TRUE	target	{'afghanistan': 0.79}
Factual Knowledge	capital_world	Manila is to Philippines as Mogadishu is to	somalia	Somalia	0.57	1	1	{'Somalia': 0.57, 'what': 0.06, '______': 0.03, 'which': 0.02, '__': 0.02}	0	0.574219	0	1	key	key|target	0.79	TRUE	TRUE	TRUE	target	{'somalia': 0.79}
Factual Knowledge	capital_world	Harare is to Zimbabwe as Managua is to	nicaragua	Nicaragua	0.56	1	1	{'Nicaragua': 0.56, 'what': 0.13, '______': 0.07, '_____': 0.03, '__': 0.03}	0	0.5625	0	1	key	key|target	0.79	TRUE	TRUE	TRUE	target	{'nicaragua': 0.79}
Factual Knowledge	country_capital	Dhaka is to Bangladesh as Madrid is to	spain	Spain	0.55	1	1	{'Spain': 0.55, '______': 0.1, '__': 0.03, 'what': 0.03, '_____': 0.03}	0	0.550781	0	1	key	key|target	0.79	TRUE	TRUE	TRUE	target	{'spain': 0.79}
Factual Knowledge	name_nationality	leibniz is to German as napoleon is to	french	French	0.55	1	1	{'French': 0.55, 'french': 0.11, 'Italian': 0.04, 'France': 0.04, 'English': 0.02}	0	0.554688	0	1	key	key|target	0.79	TRUE	TRUE	TRUE	target	{'french': 0.79}
Factual Knowledge	capital_world	Tokyo is to Japan as Oslo is to	norway	Norway	0.55	1	1	{'Norway': 0.55, 'what': 0.06, 'which': 0.04, 'A': 0.04, '______': 0.03}	0	0.554688	0	1	key	key|target	0.79	TRUE	TRUE	TRUE	target	{'norway': 0.79}
Factual Knowledge	capital_world	Dhaka is to Bangladesh as Madrid is to	spain	Spain	0.55	1	1	{'Spain': 0.55, '______': 0.1, '__': 0.03, 'what': 0.03, '_____': 0.03}	0	0.550781	0	1	key	key|target	0.79	TRUE	TRUE	TRUE	target	{'spain': 0.79}
Factual Knowledge	country_capital	China is to Beijing as England is to	london	London	0.48	1	1	{'London': 0.48, '______': 0.08, 'England': 0.04, 'Great': 0.04, '__': 0.04}	0	0.480469	0	1	key	key|target	0.79	TRUE	TRUE	TRUE	target	{'london': 0.79}
Factual Knowledge	name_occupation	strauss is to composer as tolstoi is to	novelist	novelist	0.48	1	1	{'novelist': 0.48, 'writer': 0.24, 'author': 0.08, 'what': 0.01, 'novel': 0.01}	0	0.480469	0	1	key	key|target	0.79	TRUE	TRUE	TRUE	target	{'novelist': 0.79}
Factual Knowledge	capital_world	China is to Beijing as England is to	london	London	0.48	1	1	{'London': 0.48, '______': 0.08, 'England': 0.04, 'Great': 0.04, '__': 0.04}	0	0.480469	0	1	key	key|target	0.79	TRUE	TRUE	TRUE	target	{'london': 0.79}
Factual Knowledge	capital_world	Quito is to Ecuador as Taipei is to	taiwan	Taiwan	0.47	1	1	{'Taiwan': 0.47, '__': 0.06, '______': 0.06, '_____': 0.03, ':': 0.03}	0	0.472656	0	1	key	key|target	0.79	TRUE	TRUE	TRUE	target	{'taiwan': 0.79}
Factual Knowledge	country_language	Chile is to Spanish as Netherlands is to	dutch	Dutch	0.46	1	1	{'Dutch': 0.46, '______': 0.07, ':': 0.03, '': 0.02, 'English': 0.02}	0	0.457031	0	1	key	key|target	0.79	TRUE	TRUE	TRUE	target	{'dutch': 0.79}
Factual Knowledge	country_capital	Sofia is to Bulgaria as Tehran is to	iran	Iran	0.46	1	1	{'Iran': 0.46, 'what': 0.07, '__': 0.05, '______': 0.04, 'which': 0.02}	0	0.462891	0	1	key	key|target	0.79	TRUE	TRUE	TRUE	target	{'iran': 0.79}
Factual Knowledge	name_occupation	goethe is to poet as moses is to	prophet	prophet	0.46	1	1	{'prophet': 0.46, 'law': 0.05, 'leader': 0.02, '______': 0.02, '__': 0.02}	0	0.455078	0	1	key	key|target	0.79	TRUE	TRUE	TRUE	target	{'prophet': 0.79}
Factual Knowledge	capital_world	Sofia is to Bulgaria as Tehran is to	iran	Iran	0.46	1	1	{'Iran': 0.46, 'what': 0.07, '__': 0.05, '______': 0.04, 'which': 0.02}	0	0.462891	0	1	key	key|target	0.79	TRUE	TRUE	TRUE	target	{'iran': 0.79}
Factual Knowledge	capital_world	Georgetown is to Guyana as Nicosia is to	cyprus	Cyprus	0.46	1	1	{'Cyprus': 0.46, '__': 0.1, '______': 0.07, 'which': 0.05, 'what': 0.05}	0	0.464844	0	1	key	key|target	0.79	TRUE	TRUE	TRUE	target	{'cyprus': 0.79}
Factual Knowledge	name_occupation	hume is to philosopher as mozart is to	composer	composer	0.44	1	1	{'composer': 0.44, 'musician': 0.32, 'music': 0.02, 'pian': 0.01, '?': 0.01}	0	0.4375	0	1	key	key|target	0.79	TRUE	TRUE	TRUE	target	{'composer': 0.79}
Factual Knowledge	country_capital	London is to England as Taipei is to	taiwan	Taiwan	0.42	1	1	{'Taiwan': 0.42, '______': 0.07, '__': 0.06, '_____': 0.04, 'what': 0.03}	0	0.419922	0	1	key	key|target	0.79	TRUE	TRUE	TRUE	target	{'taiwan': 0.79}
Factual Knowledge	capital_world	London is to England as Taipei is to	taiwan	Taiwan	0.42	1	1	{'Taiwan': 0.42, '______': 0.07, '__': 0.06, '_____': 0.04, 'what': 0.03}	0	0.419922	0	1	key	key|target	0.79	TRUE	TRUE	TRUE	target	{'taiwan': 0.79}
[truncated: 17,167 more rows]

## Sheet: num_stats
	count	mean	std	min	25%	50%	75%	max
next_token_softmax	18800	0.362274	0.246097	0.04	0.16	0.28	0.52	0.99
next_token_precision@1	18800	0.585239	0.453583	0	0	1	1	1
[truncated: 6 more rows]

## Sheet: precision_stats
	TRUE	FALSE
precision@1	0.898032	0.101968
[truncated: 2 more rows]

## Sheet: area_stats
area	proportion
[truncated: 1 more rows]

[truncated: 6 more sheets: domain_stats, unbunding_type_stats, extracted_factors_stats, generated_token_stats, next_token_precision@5_stats, best_item_type_stats]
