# Supplementary material
Source: ML conference proceedings conference paper supplement (https://openreview.net/forum?id=MSm0VFL9pq)
Supplement: supplementary_material [file key.pdf › code/outputs/OLMo-2/stats/graphs/key.pdf]

### NEXT TOKEN PRECISION@1

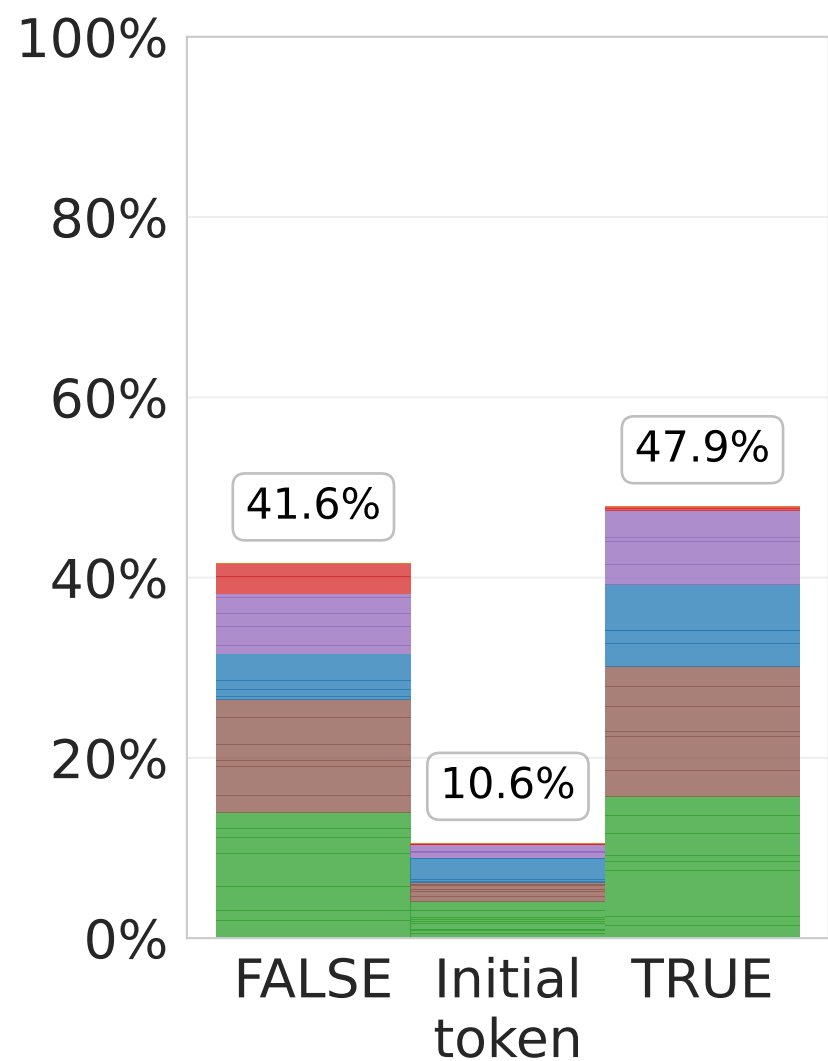

### NEXT TOKEN PRECISION@5

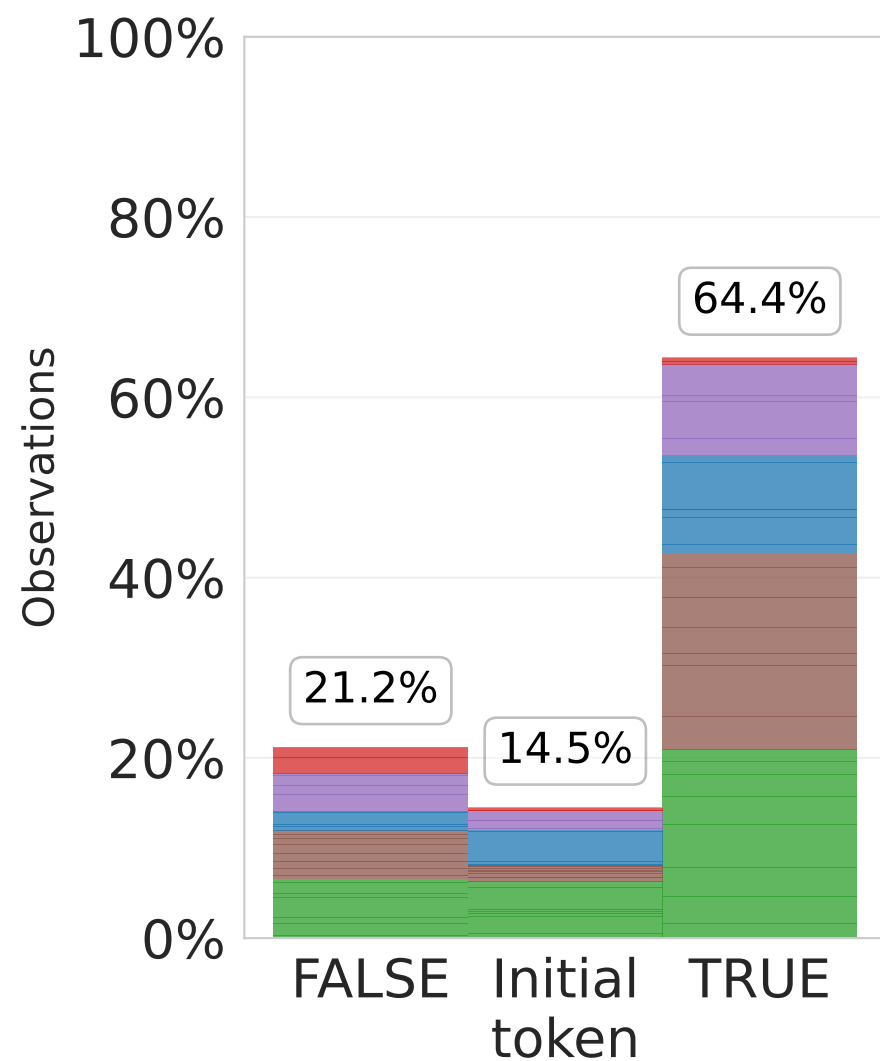

### NEXT TOKEN SOFTMAX

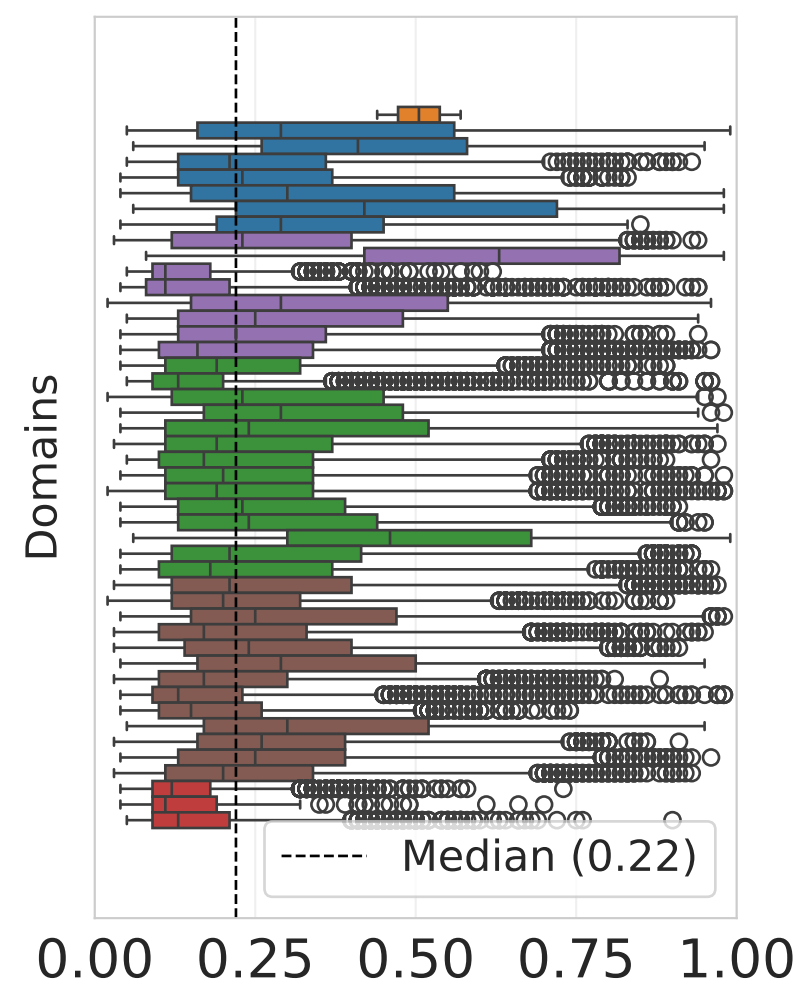

### TARGET TOKEN RANK

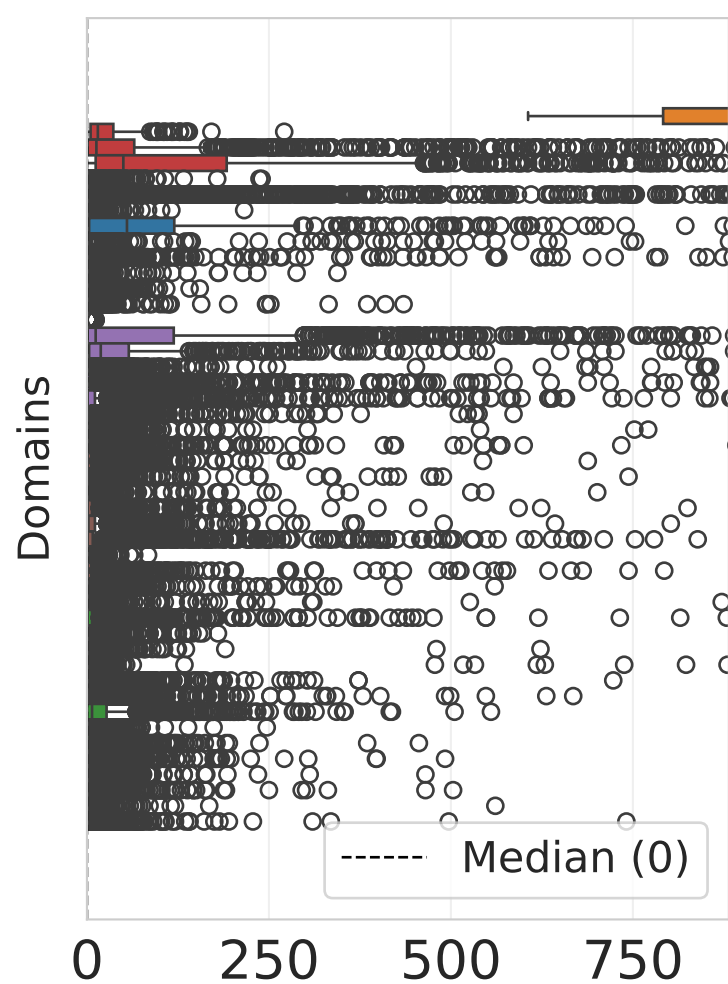

### TARGET TOKEN SOFTMAX DIFF

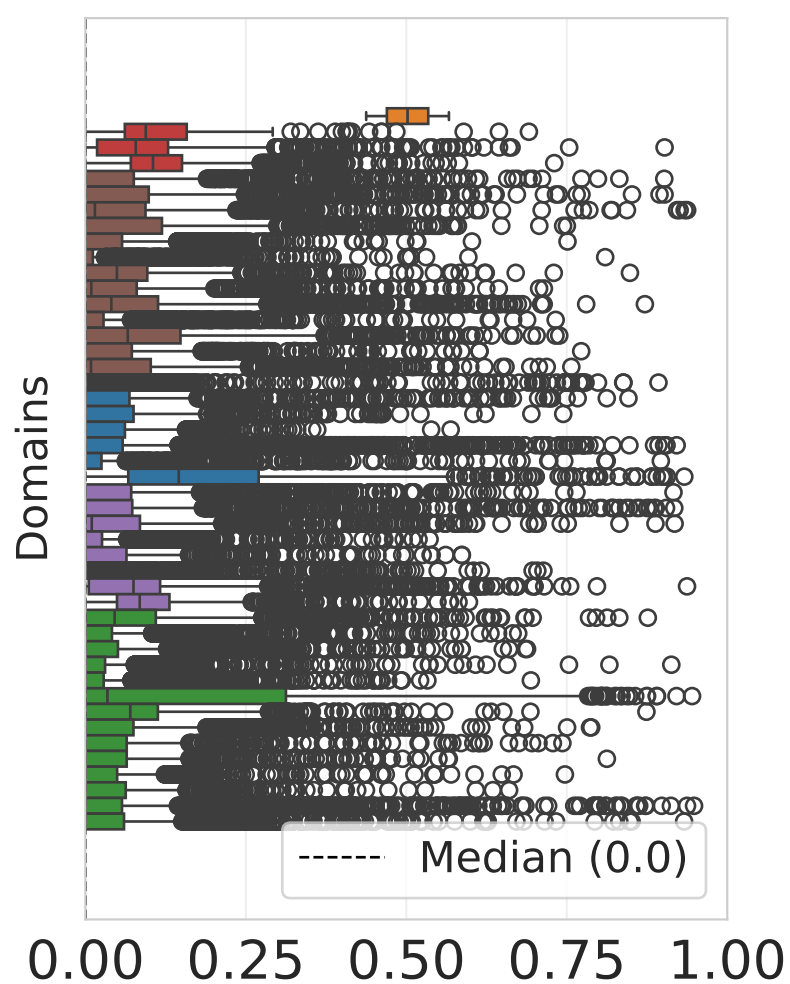

### PRECISION@1

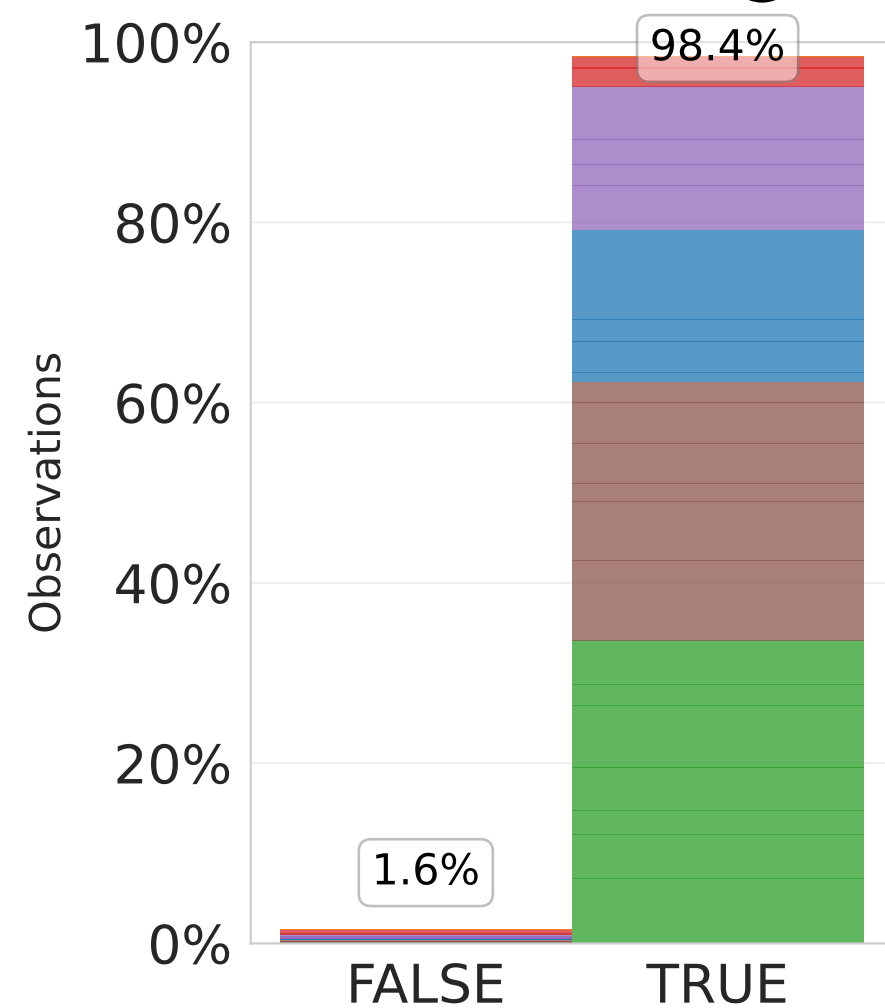

### PRECISION@5

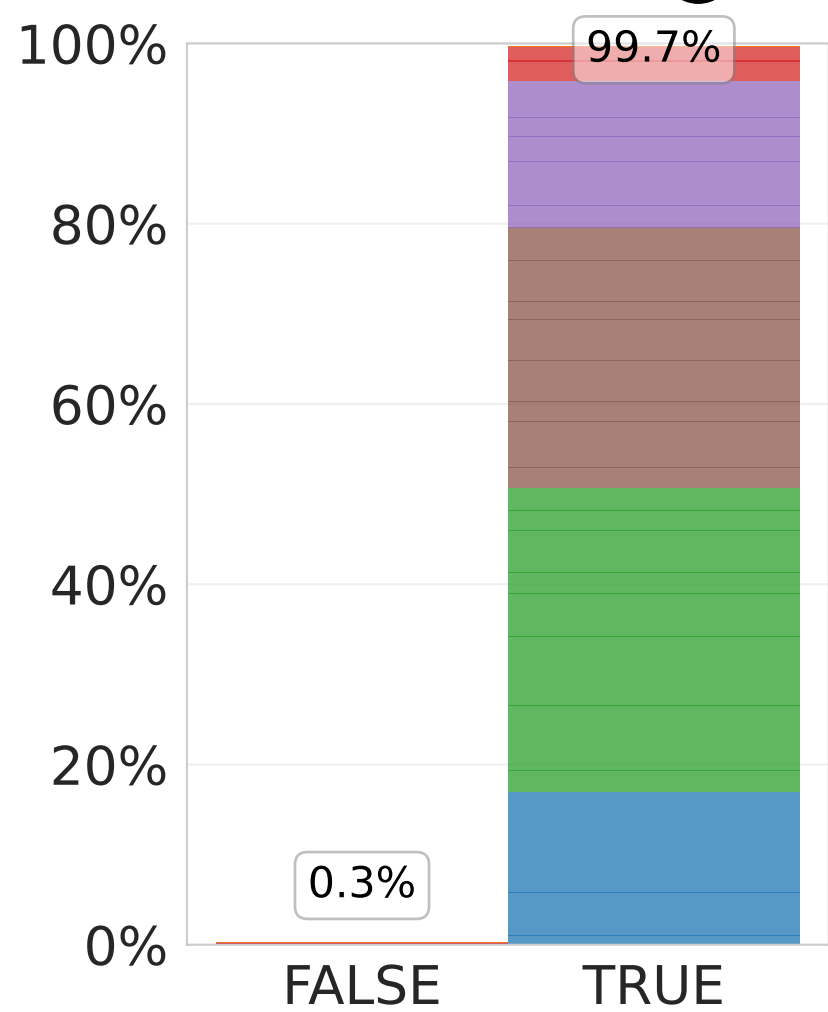

### TARGET VSA COSINE SIM

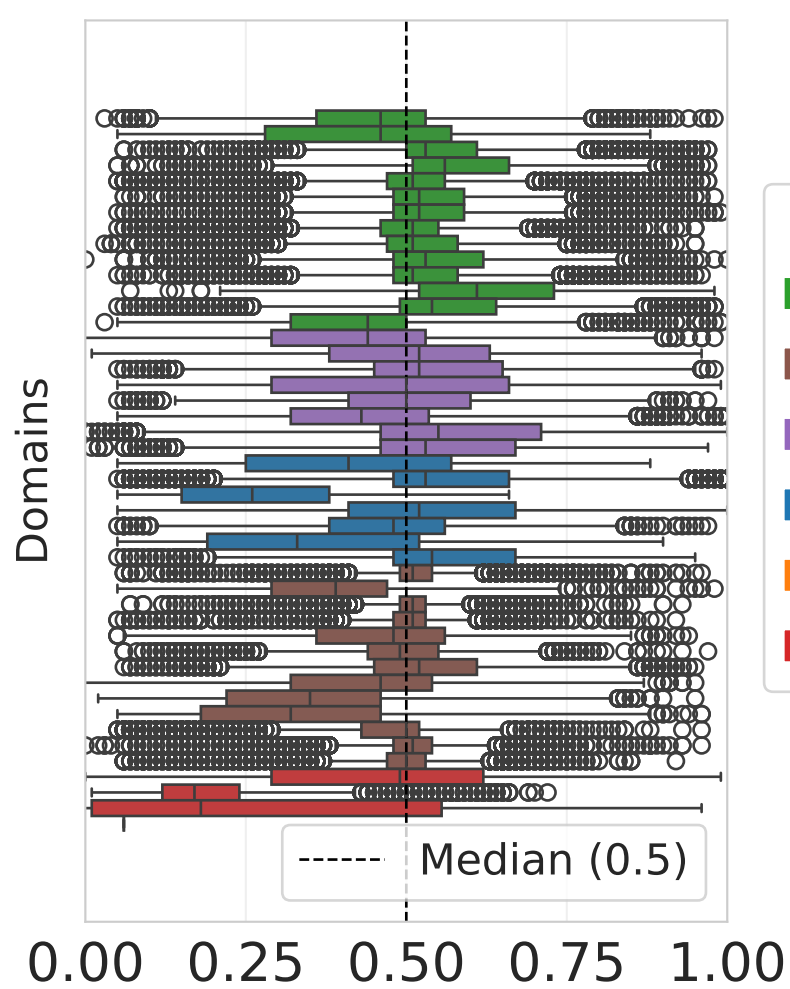

- AREAS (52 domains)
- Morphological Modifiers (14)
  - Verbal & Grammatical Forms (13)
  - Semantic Relations (8)
  - Factual Knowledge (7)
  - Mathematics (7)
  - Semantic Hierarchies (3)
