# Supplementary material
Source: ML conference proceedings conference paper supplement (https://openreview.net/forum?id=MSm0VFL9pq)
Supplement: supplementary_material [file Mathematics.xlsx]

## Sheet: items
area	domain	doc	target	generated_token	next_token_softmax	next_token_precision@1	next_token_precision@5	top5_tokens	target_token_rank	target_token_softmax	target_token_softmax_diff	normalized_target_token_rank	unbunding_type	extracted_factors	target_vsa_cosine_sim	precision@1	precision@3	precision@5	best_item_type	vsa_sim
Mathematics	math_division5	10 is to 2 as 75 is to	15	x	0.76	0	0	{'x': 0.76, 'y': 0.09, 'what': 0.05, '': 0.04, 'X': 0.03}	790	1.67638e-07	0.761719	0.992128	greedy	out-of-context	0.08	TRUE	TRUE	TRUE	target	{}
Mathematics	math_division5	40 is to 8 as 75 is to	15	x	0.71	0	0	{'x': 0.71, 'y': 0.14, 'what': 0.05, '': 0.04, 'X': 0.02}	809	1.87196e-07	0.714844	0.991938	greedy	out-of-context	0.08	TRUE	TRUE	TRUE	target	{}
Mathematics	math_division5	80 is to 16 as 75 is to	15	x	0.68	0	0	{'x': 0.68, '': 0.08, 'what': 0.08, 'y': 0.06, 'X': 0.04}	956	2.05822e-07	0.683594	0.990474	greedy	out-of-context	0.08	TRUE	TRUE	TRUE	target	{}
Mathematics	math_division2	86 is to 43 as 30 is to	15	x	0.65	0	0	{'x': 0.65, 'y': 0.2, '\\(': 0.04, 'X': 0.03, 'what': 0.03}	940	1.35042e-07	0.648437	0.990633	greedy	out-of-context	0.08	TRUE	TRUE	TRUE	target	{}
Mathematics	math_division2	2 is to 1 as 30 is to	15	x	0.59	0	0	{'x': 0.59, '': 0.13, 'X': 0.08, 'y': 0.08, 'what': 0.04}	834	8.12113e-07	0.593749	0.991689	greedy	out-of-context	0.08	TRUE	TRUE	TRUE	target	{}
Mathematics	math_division2	22 is to 11 as 30 is to	15	x	0.56	0	0	{'x': 0.56, 'y': 0.21, 'what': 0.07, '': 0.03, '\\(': 0.03}	1064	2.71946e-07	0.5625	0.989397	greedy	out-of-context	0.08	TRUE	TRUE	TRUE	target	{}
Mathematics	math_division2	94 is to 47 as 30 is to	15	x	0.56	0	0	{'x': 0.56, 'y': 0.18, 'what': 0.08, '': 0.05, '\\(': 0.03}	948	2.42144e-07	0.5625	0.990553	greedy	out-of-context	0.08	TRUE	TRUE	TRUE	target	{}
Mathematics	math_division2	88 is to 44 as 30 is to	15	x	0.54	0	0	{'x': 0.54, 'y': 0.17, 'what': 0.1, '': 0.08, '\\(': 0.03}	786	3.98606e-07	0.542968	0.992168	greedy	out-of-context	0.08	TRUE	TRUE	TRUE	target	{}
Mathematics	math_division2	82 is to 41 as 30 is to	15	x	0.54	0	0	{'x': 0.54, 'y': 0.21, 'what': 0.09, '': 0.05, '\\(': 0.04}	647	3.63216e-07	0.542968	0.993553	greedy	out-of-context	0.08	TRUE	TRUE	TRUE	target	{}
Mathematics	math_division2	32 is to 16 as 30 is to	15	x	0.53	0	0	{'x': 0.53, 'what': 0.18, 'y': 0.11, '': 0.06, 'X': 0.04}	1135	2.64496e-07	0.53125	0.98869	greedy	out-of-context	0.08	TRUE	TRUE	TRUE	target	{}
Mathematics	math_division2	98 is to 49 as 30 is to	15	x	0.52	0	0	{'x': 0.52, 'y': 0.17, 'what': 0.11, '': 0.07, '\\(': 0.03}	1265	2.66358e-07	0.519531	0.987394	greedy	out-of-context	0.08	TRUE	TRUE	TRUE	target	{}
Mathematics	math_division5	55 is to 11 as 75 is to	15	x	0.49	0	0	{'x': 0.49, 'y': 0.17, 'what': 0.15, '': 0.08, '\\(': 0.04}	549	7.07805e-07	0.49414	0.994529	greedy	out-of-context	0.08	TRUE	TRUE	TRUE	target	{}
Mathematics	math_division2	16 is to 8 as 12 is to	6	x	0.42	0	0	{'x': 0.42, 'y': 0.25, 'what': 0.2, '': 0.06, 'X': 0.02}	1321	1.11293e-07	0.419922	0.986836	greedy	out-of-context	0.08	TRUE	TRUE	TRUE	target	{}
Mathematics	math_division5	20 is to 4 as 75 is to	15	x	0.84	0	0	{'x': 0.84, 'y': 0.06, 'what': 0.03, '': 0.02, 'X': 0.02}	732	1.12224e-07	0.839844	0.992706	greedy	out-of-context	0.07	TRUE	TRUE	TRUE	target	{}
Mathematics	math_division5	20 is to 4 as 60 is to	12	x	0.82	0	0	{'x': 0.82, 'y': 0.08, 'what': 0.03, '': 0.02, 'X': 0.01}	886	9.82545e-08	0.824219	0.991171	greedy	out-of-context	0.07	TRUE	TRUE	TRUE	target	{}
Mathematics	math_division10	20 is to 2 as 60 is to	6	x	0.82	0	0	{'x': 0.82, 'y': 0.08, 'what': 0.04, '': 0.03, 'X': 0.01}	816	9.91859e-08	0.820312	0.991869	greedy	out-of-context	0.07	TRUE	TRUE	TRUE	target	{}
Mathematics	math_division5	30 is to 6 as 75 is to	15	x	0.8	0	0	{'x': 0.8, 'y': 0.09, '': 0.03, 'what': 0.03, 'X': 0.02}	531	2.18861e-07	0.804687	0.994709	greedy	out-of-context	0.07	TRUE	TRUE	TRUE	target	{}
Mathematics	math_division5	15 is to 3 as 70 is to	14	x	0.79	0	0	{'x': 0.79, 'y': 0.1, '': 0.04, 'what': 0.03, '\\(': 0.02}	2245	3.3062e-08	0.785156	0.977629	greedy	out-of-context	0.07	TRUE	TRUE	TRUE	target	{}
Mathematics	math_division5	10 is to 2 as 70 is to	14	x	0.78	0	0	{'x': 0.78, 'y': 0.09, '': 0.04, 'what': 0.04, 'X': 0.02}	1446	7.35745e-08	0.777344	0.985591	greedy	out-of-context	0.07	TRUE	TRUE	TRUE	target	{}
Mathematics	math_division5	10 is to 2 as 60 is to	12	x	0.78	0	0	{'x': 0.78, 'y': 0.1, 'what': 0.04, 'X': 0.02, '': 0.02}	1386	7.54371e-08	0.78125	0.986189	greedy	out-of-context	0.07	TRUE	TRUE	TRUE	target	{}
Mathematics	math_division5	100 is to 20 as 75 is to	15	x	0.78	0	0	{'x': 0.78, 'y': 0.06, 'what': 0.06, 'X': 0.04, '\\(': 0.02}	1348	5.93718e-08	0.78125	0.986567	greedy	out-of-context	0.07	TRUE	TRUE	TRUE	target	{}
Mathematics	math_division5	25 is to 5 as 75 is to	15	x	0.77	0	0	{'x': 0.77, 'what': 0.07, 'y': 0.07, '': 0.04, 'X': 0.02}	555	2.96161e-07	0.765625	0.994469	greedy	out-of-context	0.07	TRUE	TRUE	TRUE	target	{}
Mathematics	math_division5	30 is to 6 as 70 is to	14	x	0.77	0	0	{'x': 0.77, 'y': 0.11, '': 0.05, 'what': 0.03, 'X': 0.01}	702	1.62981e-07	0.769531	0.993005	greedy	out-of-context	0.07	TRUE	TRUE	TRUE	target	{}
Mathematics	math_double	60 is to 120 as 6 is to	12	x	0.76	0	0	{'x': 0.76, '': 0.07, 'y': 0.06, 'what': 0.06, 'X': 0.02}	758	1.546e-07	0.757812	0.992447	greedy	out-of-context	0.07	TRUE	TRUE	TRUE	target	{}
Mathematics	math_division5	10 is to 2 as 30 is to	6	x	0.76	0	0	{'x': 0.76, 'y': 0.13, 'what': 0.04, '': 0.02, 'X': 0.02}	721	1.4808e-07	0.761719	0.992815	greedy	out-of-context	0.07	TRUE	TRUE	TRUE	target	{}
Mathematics	math_division10	80 is to 8 as 20 is to	2	x	0.76	0	0	{'x': 0.76, 'y': 0.13, 'what': 0.04, '': 0.02, 'X': 0.01}	1430	1.01514e-07	0.761719	0.98575	greedy	out-of-context	0.07	TRUE	TRUE	TRUE	target	{}
Mathematics	math_division10	90 is to 9 as 60 is to	6	x	0.76	0	0	{'x': 0.76, 'y': 0.09, 'what': 0.06, '': 0.03, '\\(': 0.01}	844	1.99303e-07	0.761719	0.99159	greedy	out-of-context	0.07	TRUE	TRUE	TRUE	target	{}
Mathematics	math_division2	34 is to 17 as 90 is to	45	x	0.75	0	0	{'x': 0.75, 'y': 0.11, '': 0.04, 'what': 0.03, '\\(': 0.02}	3834	1.39698e-08	0.753906	0.961794	greedy	out-of-context	0.07	TRUE	TRUE	TRUE	target	{}
Mathematics	math_division5	60 is to 12 as 75 is to	15	x	0.75	0	0	{'x': 0.75, 'y': 0.12, 'what': 0.04, 'X': 0.02, '': 0.02}	807	1.41561e-07	0.75	0.991958	greedy	out-of-context	0.07	TRUE	TRUE	TRUE	target	{}
Mathematics	math_division2	50 is to 25 as 90 is to	45	x	0.74	0	0	{'x': 0.74, 'y': 0.09, 'what': 0.04, '': 0.04, 'X': 0.03}	2426	2.93367e-08	0.742187	0.975825	greedy	out-of-context	0.07	TRUE	TRUE	TRUE	target	{}
Mathematics	math_division5	35 is to 7 as 75 is to	15	x	0.74	0	0	{'x': 0.74, 'y': 0.1, 'what': 0.05, '': 0.03, '\\(': 0.02}	956	1.61119e-07	0.742187	0.990474	greedy	out-of-context	0.07	TRUE	TRUE	TRUE	target	{}
Mathematics	math_division5	40 is to 8 as 60 is to	12	x	0.74	0	0	{'x': 0.74, 'y': 0.14, 'what': 0.05, '': 0.02, '\\(': 0.01}	792	1.4063e-07	0.742187	0.992108	greedy	out-of-context	0.07	TRUE	TRUE	TRUE	target	{}
Mathematics	math_division10	80 is to 8 as 60 is to	6	x	0.74	0	0	{'x': 0.74, 'y': 0.13, 'what': 0.05, '': 0.02, 'X': 0.01}	1407	8.05594e-08	0.738281	0.985979	greedy	out-of-context	0.07	TRUE	TRUE	TRUE	target	{}
Mathematics	math_division10	50 is to 5 as 60 is to	6	x	0.74	0	0	{'x': 0.74, 'y': 0.1, 'what': 0.06, '': 0.03, '\\(': 0.02}	1698	6.33299e-08	0.738281	0.98308	greedy	out-of-context	0.07	TRUE	TRUE	TRUE	target	{}
Mathematics	math_division5	60 is to 12 as 30 is to	6	x	0.74	0	0	{'x': 0.74, 'y': 0.14, 'what': 0.03, '': 0.02, 'X': 0.02}	1944	5.28526e-08	0.742187	0.980628	greedy	out-of-context	0.07	TRUE	TRUE	TRUE	target	{}
Mathematics	math_division2	26 is to 13 as 90 is to	45	x	0.73	0	0	{'x': 0.73, 'y': 0.13, 'X': 0.04, 'what': 0.03, '\\(': 0.02}	4418	1.25146e-08	0.726562	0.955975	greedy	out-of-context	0.07	TRUE	TRUE	TRUE	target	{}
Mathematics	math_division2	40 is to 20 as 90 is to	45	x	0.73	0	0	{'x': 0.73, 'y': 0.12, '': 0.04, 'what': 0.04, 'X': 0.03}	1664	4.93601e-08	0.734375	0.983418	greedy	out-of-context	0.07	TRUE	TRUE	TRUE	target	{}
Mathematics	math_division2	6 is to 3 as 90 is to	45	x	0.73	0	0	{'x': 0.73, 'y': 0.12, 'what': 0.05, '': 0.04, 'X': 0.03}	5353	1.26311e-08	0.730469	0.946658	greedy	out-of-context	0.07	TRUE	TRUE	TRUE	target	{}
Mathematics	math_division5	20 is to 4 as 30 is to	6	x	0.73	0	0	{'x': 0.73, 'y': 0.12, 'what': 0.06, '': 0.03, 'X': 0.02}	657	1.68569e-07	0.734375	0.993453	greedy	out-of-context	0.07	TRUE	TRUE	TRUE	target	{}
Mathematics	math_division5	50 is to 10 as 75 is to	15	x	0.73	0	0	{'x': 0.73, 'y': 0.08, 'what': 0.06, '': 0.06, 'X': 0.03}	616	2.57045e-07	0.726562	0.993862	greedy	out-of-context	0.07	TRUE	TRUE	TRUE	target	{}
Mathematics	math_division5	100 is to 20 as 30 is to	6	x	0.73	0	0	{'x': 0.73, 'y': 0.11, 'what': 0.06, 'X': 0.04, '': 0.02}	2617	4.21423e-08	0.726562	0.973922	greedy	out-of-context	0.07	TRUE	TRUE	TRUE	target	{}
Mathematics	math_division2	28 is to 14 as 90 is to	45	x	0.72	0	0	{'x': 0.72, 'y': 0.1, 'what': 0.06, '': 0.04, 'X': 0.03}	4861	1.58325e-08	0.71875	0.951561	greedy	out-of-context	0.07	TRUE	TRUE	TRUE	target	{}
Mathematics	math_division2	20 is to 10 as 90 is to	45	x	0.72	0	0	{'x': 0.72, 'y': 0.1, 'what': 0.07, '': 0.04, 'X': 0.02}	2803	2.61934e-08	0.722656	0.972068	greedy	out-of-context	0.07	TRUE	TRUE	TRUE	target	{}
Mathematics	math_division2	100 is to 50 as 90 is to	45	x	0.72	0	0	{'x': 0.72, 'what': 0.09, 'y': 0.08, 'X': 0.04, '\\(': 0.03}	4102	1.3737e-08	0.71875	0.959124	greedy	out-of-context	0.07	TRUE	TRUE	TRUE	target	{}
Mathematics	math_division2	100 is to 50 as 30 is to	15	x	0.72	0	0	{'x': 0.72, 'y': 0.1, 'what': 0.07, 'X': 0.04, '': 0.03}	1283	8.05594e-08	0.722656	0.987215	greedy	out-of-context	0.07	TRUE	TRUE	TRUE	target	{}
Mathematics	math_division2	70 is to 35 as 90 is to	45	x	0.72	0	0	{'x': 0.72, 'y': 0.15, 'what': 0.03, '': 0.03, '\\(': 0.02}	1843	3.91155e-08	0.722656	0.981635	greedy	out-of-context	0.07	TRUE	TRUE	TRUE	target	{}
Mathematics	math_division2	6 is to 3 as 30 is to	15	x	0.71	0	0	{'x': 0.71, 'y': 0.15, 'what': 0.04, 'X': 0.03, '': 0.02}	1202	1.00117e-07	0.714844	0.988022	greedy	out-of-context	0.07	TRUE	TRUE	TRUE	target	{}
Mathematics	math_division2	10 is to 5 as 30 is to	15	x	0.71	0	0	{'x': 0.71, 'y': 0.15, 'what': 0.06, 'X': 0.02, '': 0.02}	649	2.21655e-07	0.710937	0.993533	greedy	out-of-context	0.07	TRUE	TRUE	TRUE	target	{}
Mathematics	math_division2	10 is to 5 as 90 is to	45	x	0.71	0	0	{'x': 0.71, 'y': 0.12, 'what': 0.06, '': 0.03, 'X': 0.02}	5331	1.35624e-08	0.714844	0.946877	greedy	out-of-context	0.07	TRUE	TRUE	TRUE	target	{}
Mathematics	math_division5	50 is to 10 as 30 is to	6	x	0.71	0	0	{'x': 0.71, 'y': 0.11, 'what': 0.06, '': 0.04, 'X': 0.03}	1868	5.42495e-08	0.710937	0.981386	greedy	out-of-context	0.07	TRUE	TRUE	TRUE	target	{}
Mathematics	math_division10	80 is to 8 as 70 is to	7	x	0.71	0	0	{'x': 0.71, 'y': 0.12, 'what': 0.07, '': 0.03, 'X': 0.01}	844	2.05822e-07	0.714844	0.99159	greedy	out-of-context	0.07	TRUE	TRUE	TRUE	target	{}
Mathematics	math_division2	70 is to 35 as 54 is to	27	x	0.71	0	0	{'x': 0.71, 'y': 0.1, 'what': 0.06, '': 0.06, 'X': 0.02}	3654	1.82772e-08	0.714844	0.963588	greedy	out-of-context	0.07	TRUE	TRUE	TRUE	target	{}
Mathematics	math_division2	36 is to 18 as 90 is to	45	x	0.7	0	0	{'x': 0.7, 'y': 0.14, 'what': 0.05, '': 0.05, 'X': 0.02}	2524	2.32831e-08	0.703125	0.974849	greedy	out-of-context	0.07	TRUE	TRUE	TRUE	target	{}
Mathematics	math_division2	8 is to 4 as 30 is to	15	x	0.7	0	0	{'x': 0.7, 'y': 0.15, 'what': 0.05, 'X': 0.03, '': 0.03}	892	1.63913e-07	0.695312	0.991111	greedy	out-of-context	0.07	TRUE	TRUE	TRUE	target	{}
Mathematics	math_division2	8 is to 4 as 90 is to	45	x	0.7	0	0	{'x': 0.7, 'y': 0.12, 'what': 0.06, '': 0.05, 'X': 0.03}	5601	1.31549e-08	0.703125	0.944186	greedy	out-of-context	0.07	TRUE	TRUE	TRUE	target	{}
Mathematics	math_division2	14 is to 7 as 30 is to	15	x	0.7	0	0	{'x': 0.7, 'y': 0.14, 'what': 0.03, 'X': 0.03, '': 0.03}	1488	1.11293e-07	0.703125	0.985172	greedy	out-of-context	0.07	TRUE	TRUE	TRUE	target	{}
Mathematics	math_division2	12 is to 6 as 90 is to	45	x	0.7	0	0	{'x': 0.7, 'y': 0.14, '': 0.05, 'what': 0.05, '\\(': 0.02}	3611	1.82772e-08	0.695312	0.964017	greedy	out-of-context	0.07	TRUE	TRUE	TRUE	target	{}
Mathematics	math_division2	96 is to 48 as 12 is to	6	x	0.7	0	0	{'x': 0.7, 'y': 0.1, '': 0.07, 'what': 0.06, 'X': 0.02}	1483	1.10827e-07	0.699219	0.985222	greedy	out-of-context	0.07	TRUE	TRUE	TRUE	target	{}
Mathematics	math_division5	90 is to 18 as 30 is to	6	x	0.7	0	0	{'x': 0.7, 'y': 0.12, '': 0.05, 'what': 0.04, 'X': 0.03}	1378	8.61473e-08	0.703125	0.986268	greedy	out-of-context	0.07	TRUE	TRUE	TRUE	target	{}
Mathematics	math_division5	90 is to 18 as 75 is to	15	x	0.7	0	0	{'x': 0.7, 'y': 0.08, '': 0.07, 'what': 0.07, 'X': 0.03}	773	2.02097e-07	0.695312	0.992297	greedy	out-of-context	0.07	TRUE	TRUE	TRUE	target	{}
Mathematics	math_division2	86 is to 43 as 12 is to	6	x	0.7	0	0	{'x': 0.7, 'y': 0.13, 'what': 0.05, '': 0.04, 'X': 0.03}	1327	1.07568e-07	0.695312	0.986777	greedy	out-of-context	0.07	TRUE	TRUE	TRUE	target	{}
Mathematics	math_division2	90 is to 45 as 12 is to	6	x	0.7	0	0	{'x': 0.7, 'y': 0.1, '': 0.05, 'what': 0.05, 'X': 0.03}	2035	6.75209e-08	0.703125	0.979721	greedy	out-of-context	0.07	TRUE	TRUE	TRUE	target	{}
Mathematics	math_double	34 is to 68 as 6 is to	12	x	0.69	0	0	{'x': 0.69, 'y': 0.09, 'what': 0.09, '': 0.06, 'X': 0.02}	358	1.63913e-06	0.691405	0.996433	greedy	out-of-context	0.07	TRUE	TRUE	TRUE	target	{}
Mathematics	math_division2	50 is to 25 as 30 is to	15	x	0.69	0	0	{'x': 0.69, 'y': 0.11, 'what': 0.06, '': 0.04, 'X': 0.04}	923	1.50874e-07	0.691406	0.990802	greedy	out-of-context	0.07	TRUE	TRUE	TRUE	target	{}
Mathematics	math_division2	8 is to 4 as 24 is to	12	x	0.69	0	0	{'x': 0.69, 'y': 0.15, 'what': 0.07, 'X': 0.03, '': 0.02}	847	1.76951e-07	0.6875	0.99156	greedy	out-of-context	0.07	TRUE	TRUE	TRUE	target	{}
Mathematics	math_division5	85 is to 17 as 30 is to	6	x	0.69	0	0	{'x': 0.69, 'y': 0.1, '': 0.06, 'what': 0.05, 'X': 0.03}	1581	1.16881e-07	0.691406	0.984245	greedy	out-of-context	0.07	TRUE	TRUE	TRUE	target	{}
Mathematics	math_division5	65 is to 13 as 30 is to	6	x	0.69	0	0	{'x': 0.69, 'y': 0.14, '\\(': 0.05, '': 0.03, 'X': 0.02}	1475	9.59262e-08	0.691406	0.985302	greedy	out-of-context	0.07	TRUE	TRUE	TRUE	target	{}
Mathematics	math_double	6 is to 12 as 72 is to	144	x	0.68	0	0	{'x': 0.68, 'y': 0.15, 'what': 0.05, 'X': 0.03, '': 0.03}	4954	1.86265e-08	0.679687	0.950634	greedy	out-of-context	0.07	TRUE	TRUE	TRUE	target	{}
Mathematics	math_double	85 is to 170 as 6 is to	12	x	0.68	0	0	{'x': 0.68, '': 0.11, 'what': 0.09, 'y': 0.07, 'X': 0.02}	834	1.99303e-07	0.683594	0.991689	greedy	out-of-context	0.07	TRUE	TRUE	TRUE	target	{}
Mathematics	math_division2	40 is to 20 as 82 is to	41	x	0.68	0	0	{'x': 0.68, 'y': 0.11, 'what': 0.07, '': 0.07, 'X': 0.03}	9584	3.52156e-09	0.679687	0.904496	greedy	out-of-context	0.07	TRUE	TRUE	TRUE	target	{}
Mathematics	math_division2	6 is to 3 as 28 is to	14	x	0.68	0	0	{'x': 0.68, 'y': 0.16, 'what': 0.06, '': 0.03, 'X': 0.03}	1566	8.2422e-08	0.675781	0.984395	greedy	out-of-context	0.07	TRUE	TRUE	TRUE	target	{}
Mathematics	math_division2	14 is to 7 as 24 is to	12	x	0.68	0	0	{'x': 0.68, 'y': 0.15, 'what': 0.05, 'X': 0.03, '\\(': 0.02}	1414	1.1595e-07	0.675781	0.98591	greedy	out-of-context	0.07	TRUE	TRUE	TRUE	target	{}
Mathematics	math_division5	75 is to 15 as 70 is to	14	x	0.68	0	0	{'x': 0.68, 'what': 0.1, 'y': 0.07, '': 0.06, 'X': 0.03}	1740	7.68341e-08	0.683594	0.982661	greedy	out-of-context	0.07	TRUE	TRUE	TRUE	target	{}
Mathematics	math_division5	70 is to 14 as 75 is to	15	x	0.68	0	0	{'x': 0.68, 'y': 0.08, '': 0.08, 'what': 0.07, '\\(': 0.02}	667	3.89293e-07	0.675781	0.993353	greedy	out-of-context	0.07	TRUE	TRUE	TRUE	target	{}
Mathematics	math_division2	28 is to 14 as 92 is to	46	x	0.67	0	0	{'x': 0.67, 'y': 0.11, 'what': 0.08, '': 0.05, 'X': 0.04}	6372	1.0652e-08	0.667969	0.936504	greedy	out-of-context	0.07	TRUE	TRUE	TRUE	target	{}
Mathematics	math_division5	25 is to 5 as 30 is to	6	x	0.67	0	0	{'x': 0.67, 'y': 0.12, 'what': 0.08, '': 0.05, 'X': 0.02}	1327	1.21072e-07	0.671875	0.986777	greedy	out-of-context	0.07	TRUE	TRUE	TRUE	target	{}
Mathematics	math_division2	80 is to 40 as 24 is to	12	x	0.67	0	0	{'x': 0.67, '': 0.1, 'y': 0.09, 'what': 0.05, 'X': 0.04}	1347	1.49012e-07	0.667969	0.986577	greedy	out-of-context	0.07	TRUE	TRUE	TRUE	target	{}
Mathematics	math_double	52 is to 104 as 6 is to	12	x	0.66	0	0	{'x': 0.66, '': 0.15, 'what': 0.1, 'X': 0.03, 'y': 0.02}	238	2.20537e-06	0.660154	0.997628	greedy	out-of-context	0.07	TRUE	TRUE	TRUE	target	{}
Mathematics	math_double	75 is to 150 as 64 is to	128	x	0.66	0	0	{'x': 0.66, 'what': 0.1, 'y': 0.07, '': 0.06, 'X': 0.04}	5890	9.66247e-09	0.664062	0.941307	greedy	out-of-context	0.07	TRUE	TRUE	TRUE	target	{}
Mathematics	math_double	70 is to 140 as 72 is to	144	x	0.66	0	0	{'x': 0.66, 'y': 0.13, 'what': 0.1, '': 0.04, '\\(': 0.02}	4920	1.21654e-08	0.664062	0.950973	greedy	out-of-context	0.07	TRUE	TRUE	TRUE	target	{}
Mathematics	math_division2	40 is to 20 as 24 is to	12	x	0.66	0	0	{'x': 0.66, 'y': 0.11, 'what': 0.09, '': 0.06, 'X': 0.03}	1215	1.33179e-07	0.65625	0.987893	greedy	out-of-context	0.07	TRUE	TRUE	TRUE	target	{}
Mathematics	math_division2	22 is to 11 as 90 is to	45	x	0.66	0	0	{'x': 0.66, 'y': 0.12, 'what': 0.08, '': 0.04, '\\(': 0.03}	5074	2.39816e-08	0.65625	0.949438	greedy	out-of-context	0.07	TRUE	TRUE	TRUE	target	{}
Mathematics	math_division2	30 is to 15 as 28 is to	14	x	0.66	0	0	{'x': 0.66, 'y': 0.12, 'what': 0.1, '': 0.04, 'X': 0.03}	1587	6.56582e-08	0.65625	0.984186	greedy	out-of-context	0.07	TRUE	TRUE	TRUE	target	{}
Mathematics	math_division2	12 is to 6 as 30 is to	15	x	0.66	0	0	{'x': 0.66, 'y': 0.19, 'what': 0.05, '': 0.04, 'X': 0.02}	790	1.72295e-07	0.664062	0.992128	greedy	out-of-context	0.07	TRUE	TRUE	TRUE	target	{}
Mathematics	math_division2	70 is to 35 as 30 is to	15	x	0.66	0	0	{'x': 0.66, 'y': 0.16, '': 0.05, 'what': 0.04, '\\(': 0.02}	792	2.51457e-07	0.664062	0.992108	greedy	out-of-context	0.07	TRUE	TRUE	TRUE	target	{}
Mathematics	math_double	36 is to 72 as 6 is to	12	x	0.65	0	0	{'x': 0.65, '': 0.13, 'what': 0.11, 'y': 0.04, '\\(': 0.02}	180	3.44217e-06	0.65234	0.998206	greedy	out-of-context	0.07	TRUE	TRUE	TRUE	target	{}
Mathematics	math_double	20 is to 40 as 6 is to	12	x	0.65	0	0	{'x': 0.65, '': 0.15, 'what': 0.08, 'y': 0.06, 'X': 0.02}	336	7.15256e-07	0.648437	0.996652	greedy	out-of-context	0.07	TRUE	TRUE	TRUE	target	{}
Mathematics	math_double	100 is to 200 as 64 is to	128	x	0.65	0	0	{'x': 0.65, 'what': 0.08, '': 0.08, 'X': 0.07, 'y': 0.06}	4326	1.52504e-08	0.652344	0.956892	greedy	out-of-context	0.07	TRUE	TRUE	TRUE	target	{}
Mathematics	math_division2	4 is to 2 as 24 is to	12	x	0.65	0	0	{'x': 0.65, 'y': 0.12, 'what': 0.08, '': 0.05, 'X': 0.04}	911	2.71946e-07	0.648437	0.990922	greedy	out-of-context	0.07	TRUE	TRUE	TRUE	target	{}
Mathematics	math_division2	4 is to 2 as 90 is to	45	x	0.65	0	0	{'x': 0.65, 'y': 0.11, '': 0.07, 'what': 0.07, 'X': 0.04}	4946	2.61934e-08	0.652344	0.950713	greedy	out-of-context	0.07	TRUE	TRUE	TRUE	target	{}
Mathematics	math_division5	5 is to 1 as 30 is to	6	x	0.65	0	0	{'x': 0.65, 'y': 0.09, '': 0.09, 'X': 0.05, 'what': 0.03}	2147	2.66358e-07	0.648437	0.978605	greedy	out-of-context	0.07	TRUE	TRUE	TRUE	target	{}
Mathematics	math_division2	72 is to 36 as 12 is to	6	x	0.65	0	0	{'x': 0.65, 'y': 0.11, '': 0.08, 'what': 0.07, '\\(': 0.02}	1688	1.15484e-07	0.652344	0.983179	greedy	out-of-context	0.07	TRUE	TRUE	TRUE	target	{}
Mathematics	math_double	42 is to 84 as 6 is to	12	x	0.64	0	0	{'x': 0.64, '': 0.12, 'what': 0.12, 'y': 0.04, 'X': 0.02}	219	2.29478e-06	0.644529	0.997818	greedy	out-of-context	0.07	TRUE	TRUE	TRUE	target	{}
Mathematics	math_double	44 is to 88 as 6 is to	12	x	0.64	0	0	{'x': 0.64, '': 0.15, 'what': 0.1, 'y': 0.04, 'X': 0.02}	163	4.64916e-06	0.636714	0.998376	greedy	out-of-context	0.07	TRUE	TRUE	TRUE	target	{}
Mathematics	math_root	4 is to 2 as 36 is to	6	x	0.64	0	0	{'x': 0.64, 'y': 0.12, 'what': 0.09, '': 0.05, 'X': 0.04}	705	3.94881e-07	0.640625	0.992975	greedy	out-of-context	0.07	TRUE	TRUE	TRUE	target	{}
Mathematics	math_double	70 is to 140 as 64 is to	128	x	0.64	0	0	{'x': 0.64, 'y': 0.12, 'what': 0.08, '': 0.08, 'X': 0.03}	4085	1.82772e-08	0.640625	0.959293	greedy	out-of-context	0.07	TRUE	TRUE	TRUE	target	{}
Mathematics	math_division2	40 is to 20 as 30 is to	15	x	0.64	0	0	{'x': 0.64, 'y': 0.16, 'what': 0.08, '': 0.04, 'X': 0.03}	754	2.08616e-07	0.636719	0.992486	greedy	out-of-context	0.07	TRUE	TRUE	TRUE	target	{}
Mathematics	math_division2	36 is to 18 as 56 is to	28	x	0.64	0	0	{'x': 0.64, 'y': 0.16, 'what': 0.08, '': 0.06, 'X': 0.02}	1907	3.77186e-08	0.644531	0.980997	greedy	out-of-context	0.07	TRUE	TRUE	TRUE	target	{}
Mathematics	math_division2	24 is to 12 as 58 is to	29	x	0.64	0	0	{'x': 0.64, 'what': 0.13, 'y': 0.1, '': 0.07, 'X': 0.02}	3628	1.87429e-08	0.644531	0.963847	greedy	out-of-context	0.07	TRUE	TRUE	TRUE	target	{}
Mathematics	math_division2	50 is to 25 as 12 is to	6	x	0.64	0	0	{'x': 0.64, '': 0.1, 'y': 0.09, 'what': 0.07, 'X': 0.03}	2208	6.33299e-08	0.636719	0.977997	greedy	out-of-context	0.07	TRUE	TRUE	TRUE	target	{}
Mathematics	math_division2	50 is to 25 as 58 is to	29	x	0.64	0	0	{'x': 0.64, 'y': 0.1, 'what': 0.09, '': 0.07, 'X': 0.03}	3631	2.06055e-08	0.644531	0.963817	greedy	out-of-context	0.07	TRUE	TRUE	TRUE	target	{}
Mathematics	math_division5	40 is to 8 as 30 is to	6	x	0.64	0	0	{'x': 0.64, 'y': 0.18, 'what': 0.07, '': 0.03, 'X': 0.01}	1296	1.03377e-07	0.644531	0.987085	greedy	out-of-context	0.07	TRUE	TRUE	TRUE	target	{}
Mathematics	math_division5	65 is to 13 as 70 is to	14	x	0.64	0	0	{'x': 0.64, 'y': 0.14, '\\(': 0.05, 'what': 0.04, '': 0.04}	1416	1.62981e-07	0.644531	0.98589	greedy	out-of-context	0.07	TRUE	TRUE	TRUE	target	{}
Mathematics	math_division5	85 is to 17 as 75 is to	15	x	0.64	0	0	{'x': 0.64, 'what': 0.1, 'y': 0.09, '': 0.06, '\\(': 0.03}	714	4.1537e-07	0.640625	0.992885	greedy	out-of-context	0.07	TRUE	TRUE	TRUE	target	{}
Mathematics	math_division5	95 is to 19 as 60 is to	12	x	0.64	0	0	{'x': 0.64, 'y': 0.09, 'what': 0.08, '': 0.06, '\\(': 0.04}	1627	1.23866e-07	0.636719	0.983787	greedy	out-of-context	0.07	TRUE	TRUE	TRUE	target	{}
Mathematics	math_division2	72 is to 36 as 90 is to	45	x	0.64	0	0	{'x': 0.64, 'y': 0.16, 'what': 0.08, '': 0.04, '\\(': 0.03}	2904	2.86382e-08	0.640625	0.971062	greedy	out-of-context	0.07	TRUE	TRUE	TRUE	target	{}
Mathematics	math_division2	90 is to 45 as 30 is to	15	x	0.64	0	0	{'x': 0.64, 'y': 0.19, 'what': 0.05, '': 0.03, 'X': 0.03}	870	1.72295e-07	0.640625	0.991331	greedy	out-of-context	0.07	TRUE	TRUE	TRUE	target	{}
Mathematics	math_division2	4 is to 2 as 30 is to	15	x	0.63	0	0	{'x': 0.63, 'y': 0.14, 'what': 0.07, '': 0.05, 'X': 0.05}	1225	1.81608e-07	0.632812	0.987793	greedy	out-of-context	0.07	TRUE	TRUE	TRUE	target	{}
Mathematics	math_division2	16 is to 8 as 90 is to	45	x	0.63	0	0	{'x': 0.63, 'y': 0.16, 'what': 0.08, '': 0.07, 'X': 0.02}	3110	2.98023e-08	0.632812	0.969009	greedy	out-of-context	0.07	TRUE	TRUE	TRUE	target	{}
Mathematics	math_division2	12 is to 6 as 28 is to	14	x	0.63	0	0	{'x': 0.63, 'y': 0.19, 'what': 0.08, '': 0.05, 'X': 0.01}	731	1.87196e-07	0.628906	0.992716	greedy	out-of-context	0.07	TRUE	TRUE	TRUE	target	{}
Mathematics	math_division2	94 is to 47 as 14 is to	7	x	0.63	0	0	{'x': 0.63, 'y': 0.1, '': 0.1, 'what': 0.08, 'X': 0.03}	813	3.70666e-07	0.628906	0.991899	greedy	out-of-context	0.07	TRUE	TRUE	TRUE	target	{}
Mathematics	math_double	4 is to 8 as 72 is to	144	x	0.63	0	0	{'x': 0.63, 'y': 0.15, 'what': 0.09, '': 0.05, 'X': 0.03}	3406	3.07336e-08	0.632812	0.966059	greedy	out-of-context	0.07	TRUE	TRUE	TRUE	target	{}
Mathematics	math_division2	90 is to 45 as 58 is to	29	x	0.63	0	0	{'x': 0.63, 'y': 0.12, '': 0.09, 'what': 0.08, 'X': 0.03}	4276	1.73459e-08	0.632812	0.95739	greedy	out-of-context	0.07	TRUE	TRUE	TRUE	target	{}
Mathematics	math_double	60 is to 120 as 64 is to	128	x	0.62	0	0	{'x': 0.62, 'y': 0.17, 'what': 0.06, '': 0.05, 'X': 0.03}	3997	1.68802e-08	0.621094	0.96017	greedy	out-of-context	0.07	TRUE	TRUE	TRUE	target	{}
Mathematics	math_double	76 is to 152 as 6 is to	12	x	0.62	0	0	{'x': 0.62, 'what': 0.14, '': 0.12, 'y': 0.05, 'X': 0.03}	551	4.73112e-07	0.625	0.994509	greedy	out-of-context	0.07	TRUE	TRUE	TRUE	target	{}
Mathematics	math_division2	38 is to 19 as 90 is to	45	x	0.62	0	0	{'x': 0.62, 'y': 0.18, 'what': 0.06, 'X': 0.04, '': 0.03}	2897	3.39933e-08	0.621094	0.971132	greedy	out-of-context	0.07	TRUE	TRUE	TRUE	target	{}
Mathematics	math_division2	56 is to 28 as 90 is to	45	x	0.62	0	0	{'x': 0.62, 'y': 0.17, 'what': 0.09, '': 0.05, '\\(': 0.03}	2080	3.58559e-08	0.625	0.979273	greedy	out-of-context	0.07	TRUE	TRUE	TRUE	target	{}
Mathematics	math_division2	20 is to 10 as 30 is to	15	x	0.62	0	0	{'x': 0.62, 'y': 0.17, 'what': 0.1, '': 0.04, 'X': 0.02}	337	5.96046e-07	0.624999	0.996642	greedy	out-of-context	0.07	TRUE	TRUE	TRUE	target	{}
Mathematics	math_division2	96 is to 48 as 30 is to	15	x	0.62	0	0	{'x': 0.62, 'y': 0.15, 'what': 0.09, '': 0.06, 'X': 0.02}	1189	1.55531e-07	0.621094	0.988152	greedy	out-of-context	0.07	TRUE	TRUE	TRUE	target	{}
Mathematics	math_division2	90 is to 45 as 24 is to	12	x	0.62	0	0	{'x': 0.62, 'y': 0.12, 'what': 0.09, '': 0.06, 'X': 0.03}	1401	1.35973e-07	0.625	0.986039	greedy	out-of-context	0.07	TRUE	TRUE	TRUE	target	{}
Mathematics	math_division2	80 is to 40 as 30 is to	15	x	0.62	0	0	{'x': 0.62, 'y': 0.18, '': 0.06, 'what': 0.04, 'X': 0.04}	763	2.34693e-07	0.625	0.992397	greedy	out-of-context	0.07	TRUE	TRUE	TRUE	target	{}
Mathematics	math_double	32 is to 64 as 64 is to	128		0.61	0	0	{'': 0.61, 'x': 0.1, 'what': 0.06, 'X': 0.05, 'the': 0.05}	206	1.43647e-05	0.609361	0.997947	greedy	out-of-context	0.07	TRUE	TRUE	TRUE	target	{}
Mathematics	math_double	50 is to 100 as 64 is to	128	x	0.61	0	0	{'x': 0.61, 'y': 0.14, 'what': 0.08, '': 0.06, 'X': 0.04}	6124	1.30967e-08	0.613281	0.938975	greedy	out-of-context	0.07	TRUE	TRUE	TRUE	target	{}
Mathematics	math_double	25 is to 50 as 6 is to	12	x	0.61	0	0	{'x': 0.61, '': 0.13, 'what': 0.11, 'y': 0.08, 'X': 0.03}	454	4.60073e-07	0.609375	0.995476	greedy	out-of-context	0.07	TRUE	TRUE	TRUE	target	{}
Mathematics	math_root	25 is to 5 as 36 is to	6	x	0.61	0	0	{'x': 0.61, 'what': 0.13, 'y': 0.13, '': 0.05, '\\(': 0.02}	1475	1.21072e-07	0.609375	0.985302	greedy	out-of-context	0.07	TRUE	TRUE	TRUE	target	{}
Mathematics	math_division2	34 is to 17 as 58 is to	29	x	0.61	0	0	{'x': 0.61, 'y': 0.18, '': 0.07, 'what': 0.06, 'X': 0.03}	2520	4.70318e-08	0.605469	0.974888	greedy	out-of-context	0.07	TRUE	TRUE	TRUE	target	{}
Mathematics	math_division2	36 is to 18 as 30 is to	15	x	0.61	0	0	{'x': 0.61, 'y': 0.17, 'what': 0.09, '': 0.04, 'X': 0.03}	1037	1.20141e-07	0.613281	0.989666	greedy	out-of-context	0.07	TRUE	TRUE	TRUE	target	{}
Mathematics	math_division2	28 is to 14 as 12 is to	6	x	0.61	0	0	{'x': 0.61, 'y': 0.13, 'what': 0.11, '': 0.05, 'X': 0.03}	1408	1.22935e-07	0.605469	0.985969	greedy	out-of-context	0.07	TRUE	TRUE	TRUE	target	{}
Mathematics	math_division2	28 is to 14 as 58 is to	29	x	0.61	0	0	{'x': 0.61, 'what': 0.1, '': 0.09, 'y': 0.09, 'X': 0.04}	3744	3.37604e-08	0.613281	0.962691	greedy	out-of-context	0.07	TRUE	TRUE	TRUE	target	{}
Mathematics	math_division5	65 is to 13 as 60 is to	12	x	0.61	0	0	{'x': 0.61, 'y': 0.14, '\\(': 0.07, 'what': 0.05, 'the': 0.04}	1857	1.30385e-07	0.605469	0.981495	greedy	out-of-context	0.07	TRUE	TRUE	TRUE	target	{}
Mathematics	math_division5	95 is to 19 as 75 is to	15	x	0.61	0	0	{'x': 0.61, 'what': 0.12, 'y': 0.08, '': 0.07, 'X': 0.04}	848	2.96161e-07	0.605468	0.99155	greedy	out-of-context	0.07	TRUE	TRUE	TRUE	target	{}
Mathematics	math_division5	95 is to 19 as 30 is to	6	x	0.61	0	0	{'x': 0.61, 'y': 0.1, 'what': 0.08, '': 0.08, 'X': 0.04}	2080	9.63919e-08	0.609375	0.979273	greedy	out-of-context	0.07	TRUE	TRUE	TRUE	target	{}
Mathematics	math_division2	60 is to 30 as 90 is to	45	x	0.61	0	0	{'x': 0.61, 'y': 0.21, 'what': 0.06, '': 0.04, 'X': 0.03}	1186	6.10016e-08	0.613281	0.988182	greedy	out-of-context	0.07	TRUE	TRUE	TRUE	target	{}
Mathematics	math_division2	88 is to 44 as 12 is to	6	x	0.61	0	0	{'x': 0.61, '': 0.12, 'y': 0.09, 'what': 0.08, '\\(': 0.02}	1050	3.63216e-07	0.605468	0.989537	greedy	out-of-context	0.07	TRUE	TRUE	TRUE	target	{}
Mathematics	math_division2	92 is to 46 as 14 is to	7	x	0.61	0	0	{'x': 0.61, '': 0.11, 'what': 0.11, 'y': 0.08, '\\(': 0.02}	843	3.59491e-07	0.609375	0.9916	greedy	out-of-context	0.07	TRUE	TRUE	TRUE	target	{}
Mathematics	math_division2	52 is to 26 as 90 is to	45	x	0.6	0	0	{'x': 0.6, 'y': 0.17, 'what': 0.08, '': 0.04, '\\(': 0.03}	2382	4.70318e-08	0.597656	0.976264	greedy	out-of-context	0.07	TRUE	TRUE	TRUE	target	{}
Mathematics	math_division2	54 is to 27 as 90 is to	45	x	0.6	0	0	{'x': 0.6, 'y': 0.18, 'what': 0.08, '': 0.05, '\\(': 0.03}	2227	3.84171e-08	0.597656	0.977808	greedy	out-of-context	0.07	TRUE	TRUE	TRUE	target	{}
Mathematics	math_division2	4 is to 2 as 12 is to	6	x	0.6	0	0	{'x': 0.6, 'y': 0.17, 'what': 0.09, '': 0.05, 'X': 0.04}	535	5.21541e-07	0.601562	0.994669	greedy	out-of-context	0.07	TRUE	TRUE	TRUE	target	{}
Mathematics	math_division2	18 is to 9 as 90 is to	45	x	0.6	0	0	{'x': 0.6, 'y': 0.18, 'what': 0.09, '': 0.04, 'X': 0.02}	4150	2.07219e-08	0.601562	0.958646	greedy	out-of-context	0.07	TRUE	TRUE	TRUE	target	{}
Mathematics	math_division2	12 is to 6 as 58 is to	29	x	0.6	0	0	{'x': 0.6, 'y': 0.15, '': 0.1, 'what': 0.09, 'X': 0.02}	3963	2.11876e-08	0.597656	0.960509	greedy	out-of-context	0.07	TRUE	TRUE	TRUE	target	{}
Mathematics	math_division2	96 is to 48 as 90 is to	45	x	0.6	0	0	{'x': 0.6, 'y': 0.14, 'what': 0.13, '': 0.04, '\\(': 0.03}	3235	3.65544e-08	0.597656	0.967763	greedy	out-of-context	0.07	TRUE	TRUE	TRUE	target	{}
Mathematics	math_division2	84 is to 42 as 12 is to	6	x	0.6	0	0	{'x': 0.6, 'y': 0.14, 'what': 0.11, '': 0.04, 'X': 0.03}	1914	8.98726e-08	0.601562	0.980927	greedy	out-of-context	0.07	TRUE	TRUE	TRUE	target	{}
Mathematics	math_double	95 is to 190 as 64 is to	128	x	0.59	0	0	{'x': 0.59, 'y': 0.12, 'what': 0.08, '': 0.08, '\\(': 0.04}	6539	1.9907e-08	0.589844	0.934839	greedy	out-of-context	0.07	TRUE	TRUE	TRUE	target	{}
Mathematics	math_division2	36 is to 18 as 58 is to	29	x	0.59	0	0	{'x': 0.59, 'y': 0.12, '': 0.12, 'what': 0.11, 'X': 0.03}	2356	3.0268e-08	0.589844	0.976523	greedy	out-of-context	0.07	TRUE	TRUE	TRUE	target	{}
Mathematics	math_division2	26 is to 13 as 30 is to	15	x	0.59	0	0	{'x': 0.59, 'y': 0.21, 'X': 0.05, 'what': 0.04, '\\(': 0.03}	1056	1.76951e-07	0.59375	0.989477	greedy	out-of-context	0.07	TRUE	TRUE	TRUE	target	{}
Mathematics	math_division2	22 is to 11 as 56 is to	28	x	0.59	0	0	{'x': 0.59, 'y': 0.17, 'what': 0.11, '': 0.04, '\\(': 0.02}	4268	3.49246e-08	0.585937	0.95747	greedy	out-of-context	0.07	TRUE	TRUE	TRUE	target	{}
Mathematics	math_division5	5 is to 1 as 75 is to	15	x	0.59	0	0	{'x': 0.59, '': 0.14, 'X': 0.06, 'y': 0.06, 'what': 0.05}	1454	4.84288e-07	0.59375	0.985511	greedy	out-of-context	0.07	TRUE	TRUE	TRUE	target	{}
Mathematics	math_division2	72 is to 36 as 30 is to	15	x	0.59	0	0	{'x': 0.59, 'y': 0.17, 'what': 0.09, '': 0.06, '\\(': 0.03}	1098	1.77883e-07	0.585937	0.989059	greedy	out-of-context	0.07	TRUE	TRUE	TRUE	target	{}
Mathematics	math_division2	78 is to 39 as 12 is to	6	x	0.59	0	0	{'x': 0.59, 'y': 0.11, 'what': 0.11, '': 0.1, 'X': 0.03}	1464	1.47149e-07	0.589844	0.985411	greedy	out-of-context	0.07	TRUE	TRUE	TRUE	target	{}
Mathematics	math_division2	74 is to 37 as 90 is to	45	x	0.59	0	0	{'x': 0.59, 'y': 0.19, 'what': 0.09, '\\(': 0.03, 'X': 0.03}	2380	3.79514e-08	0.589844	0.976283	greedy	out-of-context	0.07	TRUE	TRUE	TRUE	target	{}
Mathematics	math_division2	82 is to 41 as 12 is to	6	x	0.59	0	0	{'x': 0.59, 'y': 0.13, 'what': 0.11, '': 0.09, '\\(': 0.02}	1162	1.9744e-07	0.585937	0.988421	greedy	out-of-context	0.07	TRUE	TRUE	TRUE	target	{}
Mathematics	math_double	8 is to 16 as 72 is to	144	x	0.58	0	0	{'x': 0.58, 'y': 0.13, 'what': 0.13, '': 0.05, 'X': 0.05}	5421	1.95578e-08	0.578125	0.94598	greedy	out-of-context	0.07	TRUE	TRUE	TRUE	target	{}
Mathematics	math_double	26 is to 52 as 6 is to	12	x	0.58	0	0	{'x': 0.58, '': 0.16, 'what': 0.12, 'y': 0.05, 'X': 0.03}	191	5.126e-06	0.582026	0.998097	greedy	out-of-context	0.07	TRUE	TRUE	TRUE	target	{}
Mathematics	math_division2	34 is to 17 as 30 is to	15	x	0.58	0	0	{'x': 0.58, 'y': 0.22, 'what': 0.05, '': 0.04, '\\(': 0.04}	754	2.49594e-07	0.582031	0.992486	greedy	out-of-context	0.07	TRUE	TRUE	TRUE	target	{}
Mathematics	math_division2	42 is to 21 as 90 is to	45	x	0.58	0	0	{'x': 0.58, 'y': 0.19, 'what': 0.08, '': 0.04, '\\(': 0.04}	3741	2.28174e-08	0.582031	0.962721	greedy	out-of-context	0.07	TRUE	TRUE	TRUE	target	{}
Mathematics	math_division2	48 is to 24 as 30 is to	15	x	0.58	0	0	{'x': 0.58, 'y': 0.16, 'what': 0.11, '': 0.05, 'X': 0.03}	1100	1.68569e-07	0.578125	0.989039	greedy	out-of-context	0.07	TRUE	TRUE	TRUE	target	{}
Mathematics	math_division2	8 is to 4 as 58 is to	29	x	0.58	0	0	{'x': 0.58, 'y': 0.14, 'what': 0.09, '': 0.09, 'X': 0.03}	4815	2.68919e-08	0.582031	0.952019	greedy	out-of-context	0.07	TRUE	TRUE	TRUE	target	{}
Mathematics	math_division2	8 is to 4 as 12 is to	6	x	0.58	0	0	{'x': 0.58, 'y': 0.22, 'what': 0.08, '': 0.03, 'X': 0.03}	594	3.25963e-07	0.582031	0.994081	greedy	out-of-context	0.07	TRUE	TRUE	TRUE	target	{}
Mathematics	math_division2	60 is to 30 as 12 is to	6	x	0.58	0	0	{'x': 0.58, 'y': 0.15, '': 0.09, 'what': 0.09, 'X': 0.03}	1646	6.1933e-08	0.582031	0.983598	greedy	out-of-context	0.07	TRUE	TRUE	TRUE	target	{}
Mathematics	math_division2	76 is to 38 as 90 is to	45	x	0.58	0	0	{'x': 0.58, 'y': 0.24, 'what': 0.08, '\\(': 0.03, '': 0.03}	2247	3.32948e-08	0.578125	0.977609	greedy	out-of-context	0.07	TRUE	TRUE	TRUE	target	{}
Mathematics	math_double	30 is to 60 as 64 is to	128	x	0.57	0	0	{'x': 0.57, 'y': 0.17, '': 0.09, 'what': 0.06, 'X': 0.04}	3670	3.07336e-08	0.570312	0.963429	greedy	out-of-context	0.07	TRUE	TRUE	TRUE	target	{}
Mathematics	math_double	35 is to 70 as 64 is to	128	x	0.57	0	0	{'x': 0.57, 'y': 0.17, 'what': 0.09, '': 0.07, 'X': 0.03}	5617	1.50176e-08	0.566406	0.944027	greedy	out-of-context	0.07	TRUE	TRUE	TRUE	target	{}
Mathematics	math_double	80 is to 160 as 64 is to	128	x	0.57	0	0	{'x': 0.57, '': 0.13, 'y': 0.1, 'what': 0.09, 'X': 0.04}	2609	4.42378e-08	0.574219	0.974002	greedy	out-of-context	0.07	TRUE	TRUE	TRUE	target	{}
Mathematics	math_division2	34 is to 17 as 24 is to	12	x	0.57	0	0	{'x': 0.57, 'y': 0.2, 'what': 0.07, '': 0.05, '\\(': 0.03}	1623	9.45292e-08	0.570312	0.983827	greedy	out-of-context	0.07	TRUE	TRUE	TRUE	target	{}
Mathematics	math_division2	28 is to 14 as 30 is to	15	x	0.57	0	0	{'x': 0.57, 'y': 0.18, 'what': 0.08, 'X': 0.05, '': 0.04}	1137	2.70084e-07	0.570312	0.98867	greedy	out-of-context	0.07	TRUE	TRUE	TRUE	target	{}
Mathematics	math_division2	16 is to 8 as 30 is to	15	x	0.57	0	0	{'x': 0.57, 'y': 0.22, 'what': 0.09, '': 0.05, 'X': 0.02}	522	3.241e-07	0.570312	0.994798	greedy	out-of-context	0.07	TRUE	TRUE	TRUE	target	{}
Mathematics	math_division2	16 is to 8 as 24 is to	12	x	0.57	0	0	{'x': 0.57, 'y': 0.21, 'what': 0.13, '': 0.03, 'X': 0.02}	410	4.35859e-07	0.566406	0.995914	greedy	out-of-context	0.07	TRUE	TRUE	TRUE	target	{}
Mathematics	math_division2	94 is to 47 as 12 is to	6	x	0.57	0	0	{'x': 0.57, 'y': 0.13, 'what': 0.1, '': 0.09, 'X': 0.03}	1518	1.44355e-07	0.570312	0.984873	greedy	out-of-context	0.07	TRUE	TRUE	TRUE	target	{}
Mathematics	math_division2	74 is to 37 as 80 is to	40	x	0.57	0	0	{'x': 0.57, 'y': 0.2, 'what': 0.08, 'X': 0.03, '\\(': 0.03}	2194	5.02914e-08	0.574219	0.978137	greedy	out-of-context	0.07	TRUE	TRUE	TRUE	target	{}
Mathematics	math_double	20 is to 40 as 95 is to	190	x	0.56	0	0	{'x': 0.56, '': 0.16, 'y': 0.09, 'what': 0.08, 'X': 0.05}	2700	2.4098e-08	0.5625	0.973095	greedy	out-of-context	0.07	TRUE	TRUE	TRUE	target	{}
Mathematics	math_division2	56 is to 28 as 12 is to	6	x	0.56	0	0	{'x': 0.56, 'y': 0.15, 'what': 0.12, '': 0.09, '\\(': 0.02}	1427	1.21072e-07	0.558594	0.98578	greedy	out-of-context	0.07	TRUE	TRUE	TRUE	target	{}
Mathematics	math_division2	48 is to 24 as 12 is to	6	x	0.56	0	0	{'x': 0.56, 'y': 0.14, 'what': 0.11, '': 0.08, '\\(': 0.03}	1800	1.15484e-07	0.558594	0.982063	greedy	out-of-context	0.07	TRUE	TRUE	TRUE	target	{}
Mathematics	math_division2	44 is to 22 as 90 is to	45	x	0.56	0	0	{'x': 0.56, 'y': 0.17, 'what': 0.12, '': 0.05, '\\(': 0.04}	2705	4.49363e-08	0.5625	0.973045	greedy	out-of-context	0.07	TRUE	TRUE	TRUE	target	{}
Mathematics	math_division2	46 is to 23 as 12 is to	6	x	0.56	0	0	{'x': 0.56, 'y': 0.16, 'what': 0.1, '': 0.08, '\\(': 0.03}	1110	1.8999e-07	0.558594	0.988939	greedy	out-of-context	0.07	TRUE	TRUE	TRUE	target	{}
Mathematics	math_division2	10 is to 5 as 12 is to	6	x	0.56	0	0	{'x': 0.56, 'y': 0.21, 'what': 0.1, '': 0.04, 'X': 0.02}	1084	1.76951e-07	0.558594	0.989198	greedy	out-of-context	0.07	TRUE	TRUE	TRUE	target	{}
Mathematics	math_double	10 is to 20 as 55 is to	110	x	0.55	0	0	{'x': 0.55, 'what': 0.12, '': 0.12, 'y': 0.1, 'X': 0.06}	1230	1.05705e-07	0.546875	0.987743	greedy	out-of-context	0.07	TRUE	TRUE	TRUE	target	{}
Mathematics	math_double	25 is to 50 as 72 is to	144	x	0.55	0	0	{'x': 0.55, 'y': 0.14, 'what': 0.11, '': 0.08, 'X': 0.04}	4719	1.43191e-08	0.550781	0.952976	greedy	out-of-context	0.07	TRUE	TRUE	TRUE	target	{}
Mathematics	math_double	24 is to 48 as 64 is to	128	x	0.55	0	0	{'x': 0.55, 'y': 0.16, 'what': 0.11, '': 0.06, '\\(': 0.03}	4664	2.68919e-08	0.546875	0.953524	greedy	out-of-context	0.07	TRUE	TRUE	TRUE	target	{}
Mathematics	math_double	18 is to 36 as 6 is to	12	x	0.55	0	0	{'x': 0.55, 'what': 0.25, 'y': 0.08, '': 0.06, 'X': 0.02}	242	1.14739e-06	0.554686	0.997588	greedy	out-of-context	0.07	TRUE	TRUE	TRUE	target	{}
Mathematics	math_double	82 is to 164 as 6 is to	12	x	0.55	0	0	{'x': 0.55, 'what': 0.19, '': 0.16, 'X': 0.03, 'y': 0.02}	381	9.90927e-07	0.554687	0.996203	greedy	out-of-context	0.07	TRUE	TRUE	TRUE	target	{}
Mathematics	math_division2	4 is to 2 as 58 is to	29	x	0.55	0	0	{'x': 0.55, 'y': 0.11, '': 0.11, 'what': 0.1, 'X': 0.05}	4294	4.70318e-08	0.554687	0.957211	greedy	out-of-context	0.07	TRUE	TRUE	TRUE	target	{}
Mathematics	math_division2	72 is to 36 as 58 is to	29	x	0.55	0	0	{'x': 0.55, 'what': 0.17, 'y': 0.11, '': 0.11, '\\(': 0.02}	3124	2.92202e-08	0.550781	0.96887	greedy	out-of-context	0.07	TRUE	TRUE	TRUE	target	{}
Mathematics	math_division2	78 is to 39 as 30 is to	15	x	0.55	0	0	{'x': 0.55, 'y': 0.19, 'what': 0.09, '': 0.07, 'X': 0.03}	941	2.66358e-07	0.550781	0.990623	greedy	out-of-context	0.07	TRUE	TRUE	TRUE	target	{}
Mathematics	math_double	8 is to 16 as 55 is to	110	x	0.54	0	0	{'x': 0.54, 'y': 0.12, 'what': 0.12, '': 0.1, 'X': 0.06}	3967	3.14321e-08	0.539062	0.960469	greedy	out-of-context	0.07	TRUE	TRUE	TRUE	target	{}
Mathematics	math_division2	26 is to 13 as 12 is to	6	x	0.54	0	0	{'x': 0.54, 'y': 0.18, 'what': 0.1, '': 0.05, 'X': 0.03}	1103	1.71363e-07	0.542969	0.989009	greedy	out-of-context	0.07	TRUE	TRUE	TRUE	target	{}
Mathematics	math_division2	52 is to 26 as 12 is to	6	x	0.54	0	0	{'x': 0.54, 'what': 0.14, 'y': 0.14, '': 0.08, 'X': 0.03}	1207	2.09548e-07	0.539062	0.987972	greedy	out-of-context	0.07	TRUE	TRUE	TRUE	target	{}
Mathematics	math_division2	48 is to 24 as 58 is to	29	x	0.54	0	0	{'x': 0.54, 'what': 0.13, 'y': 0.12, '': 0.11, 'X': 0.03}	2224	7.49715e-08	0.535156	0.977838	greedy	out-of-context	0.07	TRUE	TRUE	TRUE	target	{}
Mathematics	math_division2	46 is to 23 as 30 is to	15	x	0.54	0	0	{'x': 0.54, 'y': 0.22, 'what': 0.06, '\\(': 0.05, '': 0.04}	795	2.18861e-07	0.542969	0.992078	greedy	out-of-context	0.07	TRUE	TRUE	TRUE	target	{}
Mathematics	math_division2	2 is to 1 as 12 is to	6	x	0.54	0	0	{'x': 0.54, '': 0.22, 'y': 0.07, 'what': 0.05, 'X': 0.05}	502	1.8701e-06	0.535154	0.994998	greedy	out-of-context	0.07	TRUE	TRUE	TRUE	target	{}
Mathematics	math_squares	6 is to 36 as 16 is to	256	x	0.54	0	0	{'x': 0.54, 'y': 0.17, 'what': 0.11, '': 0.07, 'X': 0.04}	12321	6.28643e-09	0.539062	0.877222	greedy	out-of-context	0.07	TRUE	TRUE	TRUE	target	{}
Mathematics	math_squares	2 is to 4 as 12 is to	144	x	0.54	0	0	{'x': 0.54, 'y': 0.15, 'what': 0.11, '': 0.07, 'X': 0.07}	4423	2.63099e-08	0.535156	0.955925	greedy	out-of-context	0.07	TRUE	TRUE	TRUE	target	{}
Mathematics	math_division2	18 is to 9 as 30 is to	15	x	0.54	0	0	{'x': 0.54, 'y': 0.26, 'what': 0.09, '': 0.03, 'X': 0.02}	753	1.99303e-07	0.539062	0.992496	greedy	out-of-context	0.07	TRUE	TRUE	TRUE	target	{}
Mathematics	math_division2	18 is to 9 as 24 is to	12	x	0.54	0	0	{'x': 0.54, 'y': 0.24, 'what': 0.12, '': 0.03, 'X': 0.02}	702	2.00234e-07	0.539062	0.993005	greedy	out-of-context	0.07	TRUE	TRUE	TRUE	target	{}
Mathematics	math_division2	98 is to 49 as 12 is to	6	x	0.54	0	0	{'x': 0.54, '': 0.12, 'what': 0.12, 'y': 0.11, 'X': 0.03}	1337	2.20723e-07	0.535156	0.986677	greedy	out-of-context	0.07	TRUE	TRUE	TRUE	target	{}
Mathematics	math_division2	74 is to 37 as 30 is to	15	x	0.54	0	0	{'x': 0.54, 'y': 0.18, 'what': 0.1, '': 0.05, '\\(': 0.04}	793	2.92435e-07	0.542968	0.992098	greedy	out-of-context	0.07	TRUE	TRUE	TRUE	target	{}
Mathematics	math_division2	86 is to 43 as 52 is to	26	x	0.54	0	0	{'x': 0.54, 'y': 0.23, 'what': 0.06, '': 0.06, '\\(': 0.03}	1907	6.0536e-08	0.535156	0.980997	greedy	out-of-context	0.07	TRUE	TRUE	TRUE	target	{}
Mathematics	math_division2	82 is to 41 as 24 is to	12	x	0.54	0	0	{'x': 0.54, 'y': 0.16, 'what': 0.14, '': 0.06, '\\(': 0.03}	1052	1.85333e-07	0.539062	0.989517	greedy	out-of-context	0.07	TRUE	TRUE	TRUE	target	{}
Mathematics	math_division2	32 is to 16 as 58 is to	29	x	0.53	0	0	{'x': 0.53, 'what': 0.16, '': 0.12, 'y': 0.08, 'X': 0.05}	1916	9.31323e-08	0.527344	0.980907	greedy	out-of-context	0.07	TRUE	TRUE	TRUE	target	{}
Mathematics	math_division2	22 is to 11 as 24 is to	12	x	0.53	0	0	{'x': 0.53, 'y': 0.2, 'what': 0.09, '': 0.04, '\\(': 0.03}	1222	3.11062e-07	0.527343	0.987823	greedy	out-of-context	0.07	TRUE	TRUE	TRUE	target	{}
Mathematics	math_division2	68 is to 34 as 80 is to	40	x	0.53	0	0	{'x': 0.53, 'y': 0.22, 'what': 0.1, '': 0.05, '\\(': 0.03}	1482	1.09896e-07	0.527344	0.985232	greedy	out-of-context	0.07	TRUE	TRUE	TRUE	target	{}
Mathematics	math_division2	64 is to 32 as 90 is to	45	x	0.53	0	0	{'x': 0.53, 'what': 0.13, 'y': 0.12, 'X': 0.06, '': 0.06}	2734	8.56817e-08	0.53125	0.972756	greedy	out-of-context	0.07	TRUE	TRUE	TRUE	target	{}
Mathematics	math_double	26 is to 52 as 28 is to	56	x	0.52	0	0	{'x': 0.52, 'y': 0.18, 'what': 0.15, 'X': 0.04, '': 0.04}	1648	1.1595e-07	0.515625	0.983578	greedy	out-of-context	0.07	TRUE	TRUE	TRUE	target	{}
Mathematics	math_double	22 is to 44 as 64 is to	128	x	0.52	0	0	{'x': 0.52, 'y': 0.14, 'what': 0.11, '': 0.08, 'X': 0.05}	4642	3.70201e-08	0.523437	0.953743	greedy	out-of-context	0.07	TRUE	TRUE	TRUE	target	{}
Mathematics	math_division2	38 is to 19 as 30 is to	15	x	0.52	0	0	{'x': 0.52, 'y': 0.21, 'what': 0.08, 'X': 0.05, '': 0.04}	947	2.99886e-07	0.515625	0.990563	greedy	out-of-context	0.07	TRUE	TRUE	TRUE	target	{}
Mathematics	math_division2	42 is to 21 as 24 is to	12	x	0.52	0	0	{'x': 0.52, 'y': 0.18, 'what': 0.13, '': 0.05, '\\(': 0.05}	1270	1.37836e-07	0.515625	0.987345	greedy	out-of-context	0.07	TRUE	TRUE	TRUE	target	{}
Mathematics	math_squares	10 is to 100 as 12 is to	144	x	0.52	0	0	{'x': 0.52, 'y': 0.17, 'what': 0.15, 'X': 0.05, '': 0.04}	6310	1.22818e-08	0.515625	0.937121	greedy	out-of-context	0.07	TRUE	TRUE	TRUE	target	{}
Mathematics	math_double	25 is to 50 as 64 is to	128	x	0.51	0	0	{'x': 0.51, 'y': 0.15, 'what': 0.12, '': 0.09, 'X': 0.06}	2715	4.1211e-08	0.507812	0.972945	greedy	out-of-context	0.07	TRUE	TRUE	TRUE	target	{}
Mathematics	math_double	72 is to 144 as 64 is to	128	x	0.51	0	0	{'x': 0.51, 'what': 0.15, 'y': 0.14, '': 0.09, '\\(': 0.03}	4518	2.66591e-08	0.511719	0.954978	greedy	out-of-context	0.07	TRUE	TRUE	TRUE	target	{}
Mathematics	math_division2	52 is to 26 as 30 is to	15	x	0.51	0	0	{'x': 0.51, 'y': 0.18, 'what': 0.14, '': 0.05, 'X': 0.04}	690	3.83705e-07	0.511718	0.993124	greedy	out-of-context	0.07	TRUE	TRUE	TRUE	target	{}
Mathematics	math_division2	42 is to 21 as 30 is to	15	x	0.51	0	0	{'x': 0.51, 'y': 0.22, 'what': 0.1, '\\(': 0.05, '': 0.05}	1007	1.96509e-07	0.511719	0.989965	greedy	out-of-context	0.07	TRUE	TRUE	TRUE	target	{}
Mathematics	math_division2	18 is to 9 as 58 is to	29	x	0.51	0	0	{'x': 0.51, 'y': 0.19, 'what': 0.15, '': 0.08, 'X': 0.02}	3856	2.38651e-08	0.507812	0.961575	greedy	out-of-context	0.07	TRUE	TRUE	TRUE	target	{}
Mathematics	math_division2	84 is to 42 as 24 is to	12	x	0.51	0	0	{'x': 0.51, 'y': 0.19, 'what': 0.16, '': 0.04, '\\(': 0.03}	1489	1.16415e-07	0.511719	0.985162	greedy	out-of-context	0.07	TRUE	TRUE	TRUE	target	{}
Mathematics	math_double	14 is to 28 as 28 is to	56		0.5	0	0	{'': 0.5, 'x': 0.18, 'what': 0.12, 'X': 0.07, 'y': 0.02}	537	1.71363e-06	0.503905	0.994649	greedy	out-of-context	0.07	TRUE	TRUE	TRUE	target	{}
Mathematics	math_division2	56 is to 28 as 24 is to	12	x	0.5	0	0	{'x': 0.5, 'what': 0.18, 'y': 0.18, '': 0.06, '\\(': 0.03}	979	1.51806e-07	0.496094	0.990244	greedy	out-of-context	0.07	TRUE	TRUE	TRUE	target	{}
Mathematics	math_division2	62 is to 31 as 90 is to	45	x	0.5	0	0	{'x': 0.5, 'y': 0.23, 'what': 0.13, '': 0.04, '\\(': 0.03}	1745	6.47269e-08	0.503906	0.982611	greedy	out-of-context	0.07	TRUE	TRUE	TRUE	target	{}
Mathematics	math_division2	84 is to 42 as 30 is to	15	x	0.5	0	0	{'x': 0.5, 'y': 0.23, 'what': 0.13, '': 0.04, '\\(': 0.03}	1130	1.74157e-07	0.496094	0.98874	greedy	out-of-context	0.07	TRUE	TRUE	TRUE	target	{}
Mathematics	math_division2	92 is to 46 as 30 is to	15	x	0.5	0	0	{'x': 0.5, 'y': 0.19, 'what': 0.14, '': 0.07, '\\(': 0.03}	694	3.78117e-07	0.496093	0.993084	greedy	out-of-context	0.07	TRUE	TRUE	TRUE	target	{}
Mathematics	math_division2	52 is to 26 as 24 is to	12	x	0.49	0	0	{'x': 0.49, 'what': 0.19, 'y': 0.15, '': 0.05, 'X': 0.03}	842	2.81259e-07	0.490234	0.99161	greedy	out-of-context	0.07	TRUE	TRUE	TRUE	target	{}
Mathematics	math_division2	56 is to 28 as 30 is to	15	x	0.49	0	0	{'x': 0.49, 'y': 0.21, 'what': 0.12, '': 0.08, '\\(': 0.03}	767	2.66358e-07	0.49414	0.992357	greedy	out-of-context	0.07	TRUE	TRUE	TRUE	target	{}
Mathematics	math_division2	54 is to 27 as 30 is to	15	x	0.49	0	0	{'x': 0.49, 'y': 0.21, 'what': 0.12, '': 0.06, '\\(': 0.03}	823	2.6077e-07	0.49414	0.991799	greedy	out-of-context	0.07	TRUE	TRUE	TRUE	target	{}
Mathematics	math_division2	96 is to 48 as 58 is to	29	x	0.49	0	0	{'x': 0.49, 'what': 0.16, '': 0.14, 'y': 0.13, 'X': 0.02}	3820	3.51574e-08	0.488281	0.961934	greedy	out-of-context	0.07	TRUE	TRUE	TRUE	target	{}
Mathematics	math_division2	92 is to 46 as 80 is to	40	x	0.49	0	0	{'x': 0.49, 'y': 0.19, 'what': 0.17, '\\(': 0.04, '': 0.04}	1644	1.01514e-07	0.486328	0.983618	greedy	out-of-context	0.07	TRUE	TRUE	TRUE	target	{}
Mathematics	math_double	4 is to 8 as 6 is to	12	x	0.49	0	0	{'x': 0.49, 'y': 0.23, 'what': 0.15, '': 0.05, 'X': 0.02}	302	1.3262e-06	0.494139	0.996991	greedy	out-of-context	0.07	TRUE	TRUE	TRUE	target	{}
Mathematics	math_division2	68 is to 34 as 30 is to	15	x	0.49	0	0	{'x': 0.49, 'y': 0.19, 'what': 0.11, '': 0.08, '\\(': 0.03}	621	5.17815e-07	0.49414	0.993812	greedy	out-of-context	0.07	TRUE	TRUE	TRUE	target	{}
Mathematics	math_division2	62 is to 31 as 12 is to	6	x	0.49	0	0	{'x': 0.49, 'what': 0.17, 'y': 0.16, '': 0.08, 'X': 0.02}	1230	1.79745e-07	0.49414	0.987743	greedy	out-of-context	0.07	TRUE	TRUE	TRUE	target	{}
Mathematics	math_division2	64 is to 32 as 24 is to	12	x	0.49	0	0	{'x': 0.49, 'what': 0.2, 'y': 0.09, '': 0.06, 'X': 0.06}	1203	3.241e-07	0.49414	0.988012	greedy	out-of-context	0.07	TRUE	TRUE	TRUE	target	{}
Mathematics	math_division2	88 is to 44 as 92 is to	46	x	0.49	0	0	{'x': 0.49, 'y': 0.19, 'what': 0.16, '': 0.05, '\\(': 0.03}	3061	6.10016e-08	0.490234	0.969497	greedy	out-of-context	0.07	TRUE	TRUE	TRUE	target	{}
Mathematics	math_double	98 is to 196 as 6 is to	12	x	0.48	0	0	{'x': 0.48, 'what': 0.21, '': 0.18, 'y': 0.04, 'X': 0.03}	357	1.11014e-06	0.484374	0.996443	greedy	out-of-context	0.07	TRUE	TRUE	TRUE	target	{}
Mathematics	math_division2	54 is to 27 as 24 is to	12	x	0.48	0	0	{'x': 0.48, 'what': 0.17, 'y': 0.17, '': 0.07, '\\(': 0.03}	977	1.94646e-07	0.480469	0.990264	greedy	out-of-context	0.07	TRUE	TRUE	TRUE	target	{}
Mathematics	math_division2	98 is to 49 as 90 is to	45	x	0.48	0	0	{'x': 0.48, 'y': 0.19, 'what': 0.15, '': 0.05, '\\(': 0.04}	2941	6.70552e-08	0.478516	0.970693	greedy	out-of-context	0.07	TRUE	TRUE	TRUE	target	{}
Mathematics	math_division2	58 is to 29 as 90 is to	45	x	0.48	0	0	{'x': 0.48, 'y': 0.27, 'what': 0.12, '': 0.04, '\\(': 0.03}	2054	5.3551e-08	0.480469	0.979532	greedy	out-of-context	0.07	TRUE	TRUE	TRUE	target	{}
Mathematics	math_division2	66 is to 33 as 30 is to	15	x	0.48	0	0	{'x': 0.48, 'what': 0.18, 'y': 0.17, '': 0.06, 'X': 0.03}	1010	3.241e-07	0.476562	0.989935	greedy	out-of-context	0.07	TRUE	TRUE	TRUE	target	{}
Mathematics	math_division2	66 is to 33 as 24 is to	12	x	0.48	0	0	{'x': 0.48, 'what': 0.21, 'y': 0.13, '': 0.07, 'X': 0.04}	1259	2.19792e-07	0.478515	0.987454	greedy	out-of-context	0.07	TRUE	TRUE	TRUE	target	{}
Mathematics	math_division2	76 is to 38 as 30 is to	15	x	0.48	0	0	{'x': 0.48, 'y': 0.26, 'what': 0.14, '': 0.05, '\\(': 0.02}	840	2.0396e-07	0.476562	0.991629	greedy	out-of-context	0.07	TRUE	TRUE	TRUE	target	{}
Mathematics	math_double	42 is to 84 as 54 is to	108	x	0.47	0	0	{'x': 0.47, 'what': 0.19, 'y': 0.14, '': 0.09, '\\(': 0.03}	2757	3.79514e-08	0.472656	0.972527	greedy	out-of-context	0.07	TRUE	TRUE	TRUE	target	{}
Mathematics	math_division2	52 is to 26 as 58 is to	29	x	0.47	0	0	{'x': 0.47, 'y': 0.19, 'what': 0.16, '': 0.07, 'X': 0.03}	1538	1.24797e-07	0.472656	0.984674	greedy	out-of-context	0.07	TRUE	TRUE	TRUE	target	{}
Mathematics	math_division2	44 is to 22 as 30 is to	15	x	0.47	0	0	{'x': 0.47, 'y': 0.19, 'what': 0.17, '': 0.06, '\\(': 0.04}	888	2.98023e-07	0.46875	0.991151	greedy	out-of-context	0.07	TRUE	TRUE	TRUE	target	{}
Mathematics	math_division2	22 is to 11 as 12 is to	6	x	0.47	0	0	{'x': 0.47, 'y': 0.18, 'what': 0.15, '': 0.08, '\\(': 0.03}	1184	2.81259e-07	0.46875	0.988202	greedy	out-of-context	0.07	TRUE	TRUE	TRUE	target	{}
Mathematics	math_double	48 is to 96 as 64 is to	128	x	0.46	0	0	{'x': 0.46, 'what': 0.2, 'y': 0.14, '': 0.08, 'X': 0.03}	3201	4.42378e-08	0.462891	0.968102	greedy	out-of-context	0.07	TRUE	TRUE	TRUE	target	{}
Mathematics	math_double	66 is to 132 as 6 is to	12	x	0.46	0	0	{'x': 0.46, '': 0.25, 'what': 0.16, 'y': 0.04, 'X': 0.03}	379	1.50502e-06	0.464842	0.996223	greedy	out-of-context	0.07	TRUE	TRUE	TRUE	target	{}
Mathematics	math_squares	4 is to 16 as 12 is to	144	x	0.46	0	0	{'x': 0.46, 'y': 0.18, 'what': 0.18, '': 0.06, 'X': 0.05}	7206	1.14087e-08	0.460937	0.928193	greedy	out-of-context	0.07	TRUE	TRUE	TRUE	target	{}
Mathematics	math_division2	64 is to 32 as 12 is to	6	x	0.46	0	0	{'x': 0.46, '': 0.16, 'what': 0.14, 'X': 0.07, 'y': 0.06}	2375	1.92784e-07	0.460937	0.976333	greedy	out-of-context	0.07	TRUE	TRUE	TRUE	target	{}
Mathematics	math_division2	56 is to 28 as 58 is to	29	x	0.45	0	0	{'x': 0.45, 'y': 0.21, 'what': 0.16, '': 0.09, 'X': 0.02}	1909	8.14907e-08	0.447266	0.980977	greedy	out-of-context	0.07	TRUE	TRUE	TRUE	target	{}
Mathematics	math_division2	44 is to 22 as 92 is to	46	x	0.45	0	0	{'x': 0.45, 'what': 0.2, 'y': 0.17, '': 0.08, '\\(': 0.03}	3258	4.09782e-08	0.445312	0.967534	greedy	out-of-context	0.07	TRUE	TRUE	TRUE	target	{}
Mathematics	math_division2	18 is to 9 as 12 is to	6	x	0.45	0	0	{'x': 0.45, 'y': 0.23, 'what': 0.18, '': 0.06, 'X': 0.02}	946	1.76951e-07	0.453125	0.990573	greedy	out-of-context	0.07	TRUE	TRUE	TRUE	target	{}
Mathematics	math_division2	58 is to 29 as 12 is to	6	x	0.45	0	0	{'x': 0.45, 'what': 0.2, 'y': 0.17, '': 0.1, 'X': 0.02}	1109	2.35625e-07	0.453125	0.988949	greedy	out-of-context	0.07	TRUE	TRUE	TRUE	target	{}
Mathematics	math_division2	62 is to 31 as 24 is to	12	x	0.45	0	0	{'x': 0.45, 'what': 0.22, 'y': 0.19, '': 0.05, 'X': 0.02}	974	1.67638e-07	0.445312	0.990294	greedy	out-of-context	0.07	TRUE	TRUE	TRUE	target	{}
Mathematics	math_division2	64 is to 32 as 30 is to	15	x	0.45	0	0	{'x': 0.45, 'what': 0.21, 'y': 0.1, '': 0.08, 'X': 0.06}	1184	3.8743e-07	0.451171	0.988202	greedy	out-of-context	0.07	TRUE	TRUE	TRUE	target	{}
Mathematics	math_division2	84 is to 42 as 58 is to	29	x	0.45	0	0	{'x': 0.45, 'y': 0.21, 'what': 0.17, '': 0.08, '\\(': 0.02}	2987	4.05125e-08	0.451172	0.970235	greedy	out-of-context	0.07	TRUE	TRUE	TRUE	target	{}
Mathematics	math_division2	78 is to 39 as 58 is to	29	x	0.45	0	0	{'x': 0.45, 'what': 0.18, 'y': 0.15, '': 0.14, 'X': 0.02}	2323	6.89179e-08	0.445312	0.976851	greedy	out-of-context	0.07	TRUE	TRUE	TRUE	target	{}
Mathematics	math_division2	42 is to 21 as 58 is to	29	x	0.44	0	0	{'x': 0.44, 'y': 0.21, 'what': 0.16, '': 0.1, '\\(': 0.03}	2639	3.88827e-08	0.439453	0.973703	greedy	out-of-context	0.07	TRUE	TRUE	TRUE	target	{}
Mathematics	math_division2	44 is to 22 as 12 is to	6	x	0.44	0	0	{'x': 0.44, 'what': 0.2, 'y': 0.15, '': 0.11, '\\(': 0.03}	1170	2.62633e-07	0.4375	0.988341	greedy	out-of-context	0.07	TRUE	TRUE	TRUE	target	{}
Mathematics	math_squares	28 is to 784 as 16 is to	256	x	0.44	0	0	{'x': 0.44, 'what': 0.18, '': 0.12, 'X': 0.08, 'y': 0.06}	2290	1.25729e-07	0.4375	0.97718	greedy	out-of-context	0.07	TRUE	TRUE	TRUE	target	{}
Mathematics	math_division2	94 is to 47 as 58 is to	29	x	0.44	0	0	{'x': 0.44, 'y': 0.18, 'what': 0.15, '': 0.11, 'X': 0.03}	2637	6.0536e-08	0.439453	0.973722	greedy	out-of-context	0.07	TRUE	TRUE	TRUE	target	{}
Mathematics	math_division2	58 is to 29 as 80 is to	40	x	0.44	0	0	{'x': 0.44, 'y': 0.3, 'what': 0.12, '': 0.04, '\\(': 0.03}	1536	9.59262e-08	0.4375	0.984694	greedy	out-of-context	0.07	TRUE	TRUE	TRUE	target	{}
Mathematics	math_division2	76 is to 38 as 58 is to	29	x	0.44	0	0	{'x': 0.44, 'y': 0.22, 'what': 0.19, '': 0.08, '\\(': 0.02}	2244	4.35393e-08	0.4375	0.977639	greedy	out-of-context	0.07	TRUE	TRUE	TRUE	target	{}
Mathematics	math_double	34 is to 68 as 72 is to	144	y	0.43	0	0	{'y': 0.43, 'x': 0.34, 'what': 0.11, '\\(': 0.05, '': 0.02}	2135	8.801e-08	0.429687	0.978725	greedy	out-of-context	0.07	TRUE	TRUE	TRUE	target	{}
Mathematics	math_division2	54 is to 27 as 58 is to	29	x	0.43	0	0	{'x': 0.43, 'y': 0.2, 'what': 0.14, '': 0.11, 'X': 0.03}	2126	8.19564e-08	0.427734	0.978815	greedy	out-of-context	0.07	TRUE	TRUE	TRUE	target	{}
Mathematics	math_double	42 is to 84 as 64 is to	128	x	0.42	0	0	{'x': 0.42, 'y': 0.17, 'what': 0.16, '': 0.1, '\\(': 0.05}	4880	2.67755e-08	0.416016	0.951371	greedy	out-of-context	0.07	TRUE	TRUE	TRUE	target	{}
Mathematics	math_double	76 is to 152 as 64 is to	128	x	0.42	0	0	{'x': 0.42, 'what': 0.24, 'y': 0.16, '': 0.09, 'X': 0.02}	3917	3.21306e-08	0.416016	0.960967	greedy	out-of-context	0.07	TRUE	TRUE	TRUE	target	{}
Mathematics	math_division2	44 is to 22 as 24 is to	12	x	0.42	0	0	{'x': 0.42, 'what': 0.21, 'y': 0.16, '': 0.08, '\\(': 0.04}	1118	2.84985e-07	0.419922	0.988859	greedy	out-of-context	0.07	TRUE	TRUE	TRUE	target	{}
Mathematics	math_double	82 is to 164 as 72 is to	144	x	0.41	0	0	{'x': 0.41, 'what': 0.28, 'y': 0.11, '': 0.1, 'X': 0.02}	3524	5.61122e-08	0.40625	0.964884	greedy	out-of-context	0.07	TRUE	TRUE	TRUE	target	{}
Mathematics	math_division2	2 is to 1 as 82 is to	41	x	0.41	0	0	{'x': 0.41, '': 0.34, 'what': 0.07, 'X': 0.04, 'y': 0.04}	2234	3.11062e-07	0.410156	0.977738	greedy	out-of-context	0.07	TRUE	TRUE	TRUE	target	{}
Mathematics	math_division2	92 is to 46 as 58 is to	29	x	0.41	0	0	{'x': 0.41, 'what': 0.22, 'y': 0.16, '': 0.12, '\\(': 0.02}	2237	6.61239e-08	0.408203	0.977708	greedy	out-of-context	0.07	TRUE	TRUE	TRUE	target	{}
Mathematics	math_division2	62 is to 31 as 30 is to	15	x	0.41	0	0	{'x': 0.41, 'y': 0.25, 'what': 0.15, '': 0.06, '\\(': 0.03}	701	3.94881e-07	0.412109	0.993015	greedy	out-of-context	0.07	TRUE	TRUE	TRUE	target	{}
Mathematics	math_division2	64 is to 32 as 58 is to	29	x	0.41	0	0	{'x': 0.41, 'what': 0.2, 'y': 0.11, '': 0.11, 'X': 0.06}	1796	2.21655e-07	0.40625	0.982103	greedy	out-of-context	0.07	TRUE	TRUE	TRUE	target	{}
Mathematics	math_double	66 is to 132 as 64 is to	128	x	0.4	0	0	{'x': 0.4, 'what': 0.18, 'y': 0.18, '': 0.1, 'X': 0.03}	4437	4.09782e-08	0.404297	0.955786	greedy	out-of-context	0.07	TRUE	TRUE	TRUE	target	{}
Mathematics	math_division2	66 is to 33 as 58 is to	29	x	0.4	0	0	{'x': 0.4, 'what': 0.23, 'y': 0.18, '': 0.09, 'X': 0.03}	3067	7.03149e-08	0.398437	0.969438	greedy	out-of-context	0.07	TRUE	TRUE	TRUE	target	{}
Mathematics	math_division2	82 is to 41 as 58 is to	29	x	0.4	0	0	{'x': 0.4, 'y': 0.2, 'what': 0.18, '': 0.12, '\\(': 0.03}	2545	6.10016e-08	0.402344	0.974639	greedy	out-of-context	0.07	TRUE	TRUE	TRUE	target	{}
Mathematics	math_double	34 is to 68 as 64 is to	128	x	0.39	0	0	{'x': 0.39, 'y': 0.38, 'what': 0.08, '\\(': 0.04, '': 0.03}	5457	3.09665e-08	0.392578	0.945621	greedy	out-of-context	0.07	TRUE	TRUE	TRUE	target	{}
Mathematics	math_division2	44 is to 22 as 58 is to	29	x	0.39	0	0	{'x': 0.39, 'what': 0.23, 'y': 0.19, '': 0.1, '\\(': 0.02}	2436	6.65896e-08	0.390625	0.975725	greedy	out-of-context	0.07	TRUE	TRUE	TRUE	target	{}
Mathematics	math_double	44 is to 88 as 64 is to	128	x	0.38	0	0	{'x': 0.38, 'y': 0.22, 'what': 0.16, '': 0.11, 'X': 0.03}	3193	6.75209e-08	0.378906	0.968182	greedy	out-of-context	0.07	TRUE	TRUE	TRUE	target	{}
Mathematics	math_division2	58 is to 29 as 30 is to	15	x	0.38	0	0	{'x': 0.38, 'y': 0.27, 'what': 0.14, '': 0.08, 'Y': 0.03}	730	4.17233e-07	0.384765	0.992726	greedy	out-of-context	0.07	TRUE	TRUE	TRUE	target	{}
Mathematics	math_double	46 is to 92 as 64 is to	128	x	0.37	0	0	{'x': 0.37, 'what': 0.24, 'y': 0.24, '': 0.06, '\\(': 0.04}	6789	1.22236e-08	0.369141	0.932348	greedy	out-of-context	0.07	TRUE	TRUE	TRUE	target	{}
Mathematics	math_division2	98 is to 49 as 58 is to	29	x	0.37	0	0	{'x': 0.37, 'what': 0.2, 'y': 0.17, '': 0.14, 'X': 0.03}	3108	8.00937e-08	0.369141	0.969029	greedy	out-of-context	0.07	TRUE	TRUE	TRUE	target	{}
Mathematics	math_division2	58 is to 29 as 24 is to	12	x	0.37	0	0	{'x': 0.37, 'what': 0.27, 'y': 0.2, '': 0.07, 'X': 0.02}	914	2.45869e-07	0.36914	0.990892	greedy	out-of-context	0.07	TRUE	TRUE	TRUE	target	{}
Mathematics	math_division2	68 is to 34 as 58 is to	29	x	0.36	0	0	{'x': 0.36, 'what': 0.2, '': 0.18, 'y': 0.16, 'X': 0.02}	1625	1.64844e-07	0.361328	0.983807	greedy	out-of-context	0.07	TRUE	TRUE	TRUE	target	{}
Mathematics	math_division2	62 is to 31 as 58 is to	29	x	0.36	0	0	{'x': 0.36, 'y': 0.24, 'what': 0.22, '': 0.08, '\\(': 0.03}	1996	7.54371e-08	0.359375	0.98011	greedy	out-of-context	0.07	TRUE	TRUE	TRUE	target	{}
Mathematics	math_double	98 is to 196 as 72 is to	144	x	0.35	0	0	{'x': 0.35, 'what': 0.26, 'y': 0.18, '': 0.08, '\\(': 0.03}	5930	2.35159e-08	0.347656	0.940908	greedy	out-of-context	0.07	TRUE	TRUE	TRUE	target	{}
Mathematics	math_double	98 is to 196 as 64 is to	128	x	0.33	0	0	{'x': 0.33, 'what': 0.23, '': 0.15, 'y': 0.14, 'the': 0.03}	3827	5.4948e-08	0.330078	0.961864	greedy	out-of-context	0.07	TRUE	TRUE	TRUE	target	{}
Mathematics	math_double	100 is to 200 as 10 is to	20	x	0.57	0	0	{'x': 0.57, 'what': 0.14, '': 0.12, 'X': 0.08, 'y': 0.05}	606	2.71946e-07	0.566406	0.993961	key	key	0.06	TRUE	TRUE	TRUE	target	{}
Mathematics	math_double	34 is to 68 as 30 is to	60	x	0.44	0	0	{'x': 0.44, 'y': 0.35, 'what': 0.11, '': 0.03, '\\(': 0.02}	1348	1.41561e-07	0.4375	0.986567	key	key	0.06	TRUE	TRUE	TRUE	target	{}
Mathematics	math_division10	40 is to 4 as 60 is to	6	x	0.81	0	0	{'x': 0.81, 'y': 0.09, 'what': 0.04, '\\(': 0.02, '': 0.02}	726	1.05705e-07	0.808594	0.992765	greedy	out-of-context	0.06	TRUE	TRUE	TRUE	target	{}
Mathematics	math_division10	40 is to 4 as 70 is to	7	x	0.79	0	0	{'x': 0.79, 'y': 0.08, 'what': 0.05, '': 0.03, '\\(': 0.02}	387	3.14787e-07	0.792968	0.996144	greedy	out-of-context	0.06	TRUE	TRUE	TRUE	target	{}
Mathematics	math_division10	10 is to 1 as 60 is to	6	x	0.78	0	0	{'x': 0.78, 'y': 0.06, 'X': 0.04, '': 0.03, 'what': 0.03}	2636	1.01514e-07	0.78125	0.973732	greedy	out-of-context	0.06	TRUE	TRUE	TRUE	target	{}
Mathematics	math_division5	100 is to 20 as 70 is to	14	x	0.78	0	0	{'x': 0.78, 'y': 0.08, 'what': 0.05, 'X': 0.03, '\\(': 0.02}	3368	1.73459e-08	0.78125	0.966438	greedy	out-of-context	0.06	TRUE	TRUE	TRUE	target	{}
Mathematics	math_division5	20 is to 4 as 35 is to	7	x	0.77	0	0	{'x': 0.77, 'y': 0.1, 'what': 0.05, '': 0.04, 'X': 0.02}	384	3.65078e-07	0.765625	0.996173	greedy	out-of-context	0.06	TRUE	TRUE	TRUE	target	{}
Mathematics	math_division10	40 is to 4 as 30 is to	3	x	0.77	0	0	{'x': 0.77, 'y': 0.1, 'what': 0.05, '': 0.02, '\\(': 0.02}	731	1.49012e-07	0.765625	0.992716	greedy	out-of-context	0.06	TRUE	TRUE	TRUE	target	{}
Mathematics	math_division5	25 is to 5 as 60 is to	12	x	0.75	0	0	{'x': 0.75, 'y': 0.08, 'what': 0.05, '': 0.04, '\\(': 0.02}	951	1.68569e-07	0.753906	0.990523	greedy	out-of-context	0.06	TRUE	TRUE	TRUE	target	{}
Mathematics	math_division2	100 is to 50 as 10 is to	5	x	0.75	0	0	{'x': 0.75, 'y': 0.06, 'what': 0.06, '': 0.05, 'X': 0.03}	1847	6.79865e-08	0.753906	0.981595	greedy	out-of-context	0.06	TRUE	TRUE	TRUE	target	{}
Mathematics	math_division10	50 is to 5 as 70 is to	7	x	0.75	0	0	{'x': 0.75, 'y': 0.09, 'what': 0.07, '': 0.04, '\\(': 0.02}	582	2.21655e-07	0.746094	0.9942	greedy	out-of-context	0.06	TRUE	TRUE	TRUE	target	{}
Mathematics	math_division5	70 is to 14 as 30 is to	6	x	0.75	0	0	{'x': 0.75, 'y': 0.09, '': 0.04, 'what': 0.04, '\\(': 0.02}	1756	7.91624e-08	0.746094	0.982502	greedy	out-of-context	0.06	TRUE	TRUE	TRUE	target	{}
Mathematics	math_division10	10 is to 1 as 90 is to	9	x	0.75	0	0	{'x': 0.75, 'y': 0.09, '': 0.04, 'what': 0.04, 'X': 0.03}	2077	9.17353e-08	0.753906	0.979303	greedy	out-of-context	0.06	TRUE	TRUE	TRUE	target	{}
Mathematics	math_division2	100 is to 50 as 24 is to	12	x	0.74	0	0	{'x': 0.74, 'what': 0.06, 'y': 0.06, '': 0.05, 'X': 0.04}	1777	7.03149e-08	0.742187	0.982292	greedy	out-of-context	0.06	TRUE	TRUE	TRUE	target	{}
Mathematics	math_division5	80 is to 16 as 5 is to	1	x	0.73	0	0	{'x': 0.73, '': 0.12, 'what': 0.06, 'y': 0.03, 'X': 0.02}	687	3.18512e-07	0.726562	0.993154	greedy	out-of-context	0.06	TRUE	TRUE	TRUE	target	{}
Mathematics	math_division10	10 is to 1 as 70 is to	7	x	0.73	0	0	{'x': 0.73, 'y': 0.08, '': 0.05, 'X': 0.04, 'what': 0.03}	1386	2.17929e-07	0.734375	0.986189	greedy	out-of-context	0.06	TRUE	TRUE	TRUE	target	{}
Mathematics	math_division2	86 is to 43 as 14 is to	7	x	0.73	0	0	{'x': 0.73, 'y': 0.11, 'what': 0.04, '': 0.04, 'X': 0.02}	639	3.37139e-07	0.734375	0.993632	greedy	out-of-context	0.06	TRUE	TRUE	TRUE	target	{}
Mathematics	math_division10	100 is to 10 as 60 is to	6	x	0.72	0	0	{'x': 0.72, 'y': 0.1, 'what': 0.07, 'X': 0.03, '': 0.02}	2211	6.33299e-08	0.71875	0.977968	greedy	out-of-context	0.06	TRUE	TRUE	TRUE	target	{}
Mathematics	math_division5	90 is to 18 as 5 is to	1	x	0.72	0	0	{'x': 0.72, '': 0.1, 'y': 0.06, 'what': 0.05, 'how': 0.02}	999	2.09548e-07	0.71875	0.990045	greedy	out-of-context	0.06	TRUE	TRUE	TRUE	target	{}
Mathematics	math_double	70 is to 140 as 90 is to	180	x	0.71	0	0	{'x': 0.71, 'y': 0.09, 'what': 0.08, '': 0.06, 'X': 0.02}	1913	2.57278e-08	0.710937	0.980937	greedy	out-of-context	0.06	TRUE	TRUE	TRUE	target	{}
Mathematics	math_division2	24 is to 12 as 90 is to	45	x	0.71	0	0	{'x': 0.71, 'y': 0.11, 'what': 0.07, '': 0.04, 'X': 0.02}	3994	1.66474e-08	0.714844	0.9602	greedy	out-of-context	0.06	TRUE	TRUE	TRUE	target	{}
Mathematics	math_division2	30 is to 15 as 52 is to	26	x	0.71	0	0	{'x': 0.71, 'y': 0.11, 'what': 0.05, '': 0.05, 'X': 0.03}	3477	1.46683e-08	0.710937	0.965352	greedy	out-of-context	0.06	TRUE	TRUE	TRUE	target	{}
Mathematics	math_division2	30 is to 15 as 56 is to	28	x	0.71	0	0	{'x': 0.71, 'y': 0.1, 'what': 0.07, '': 0.05, 'X': 0.03}	2609	2.53785e-08	0.710937	0.974002	greedy	out-of-context	0.06	TRUE	TRUE	TRUE	target	{}
Mathematics	math_division5	50 is to 10 as 70 is to	14	x	0.71	0	0	{'x': 0.71, 'y': 0.1, '': 0.07, 'what': 0.06, 'X': 0.02}	1053	1.14087e-07	0.707031	0.989507	greedy	out-of-context	0.06	TRUE	TRUE	TRUE	target	{}
Mathematics	math_division10	100 is to 10 as 70 is to	7	x	0.71	0	0	{'x': 0.71, 'y': 0.1, 'what': 0.08, 'X': 0.03, '': 0.02}	1718	7.45058e-08	0.710937	0.98288	greedy	out-of-context	0.06	TRUE	TRUE	TRUE	target	{}
Mathematics	math_division5	80 is to 16 as 65 is to	13	x	0.71	0	0	{'x': 0.71, '': 0.07, 'what': 0.07, 'y': 0.07, 'X': 0.03}	3075	2.89874e-08	0.710937	0.969358	greedy	out-of-context	0.06	TRUE	TRUE	TRUE	target	{}
Mathematics	math_division10	20 is to 2 as 30 is to	3	x	0.71	0	0	{'x': 0.71, 'y': 0.12, 'what': 0.08, '': 0.05, 'X': 0.02}	411	3.46452e-07	0.707031	0.995904	greedy	out-of-context	0.06	TRUE	TRUE	TRUE	target	{}
Mathematics	math_division5	85 is to 17 as 70 is to	14	x	0.71	0	0	{'x': 0.71, 'y': 0.1, 'what': 0.07, '': 0.04, '\\(': 0.03}	850	1.90921e-07	0.707031	0.99153	greedy	out-of-context	0.06	TRUE	TRUE	TRUE	target	{}
Mathematics	math_division2	70 is to 35 as 18 is to	9	x	0.71	0	0	{'x': 0.71, 'y': 0.09, '': 0.08, 'what': 0.04, 'X': 0.02}	4352	2.47965e-08	0.707031	0.956633	greedy	out-of-context	0.06	TRUE	TRUE	TRUE	target	{}
Mathematics	math_double	100 is to 200 as 55 is to	110	x	0.7	0	0	{'x': 0.7, 'X': 0.08, '': 0.07, 'what': 0.06, 'y': 0.05}	1465	4.81959e-08	0.699219	0.985401	greedy	out-of-context	0.06	TRUE	TRUE	TRUE	target	{}
Mathematics	math_double	75 is to 150 as 72 is to	144	x	0.7	0	0	{'x': 0.7, 'what': 0.1, 'y': 0.08, '': 0.04, 'X': 0.03}	7185	5.50062e-09	0.695312	0.928402	greedy	out-of-context	0.06	TRUE	TRUE	TRUE	target	{}
Mathematics	math_division2	6 is to 3 as 24 is to	12	x	0.7	0	0	{'x': 0.7, 'y': 0.15, 'what': 0.06, 'X': 0.03, '': 0.02}	957	1.38767e-07	0.703125	0.990464	greedy	out-of-context	0.06	TRUE	TRUE	TRUE	target	{}
Mathematics	math_division5	90 is to 18 as 70 is to	14	x	0.7	0	0	{'x': 0.7, 'y': 0.1, 'what': 0.07, '': 0.06, 'X': 0.02}	1070	1.02911e-07	0.695312	0.989338	greedy	out-of-context	0.06	TRUE	TRUE	TRUE	target	{}
Mathematics	math_division5	25 is to 5 as 65 is to	13	x	0.69	0	0	{'x': 0.69, 'y': 0.08, 'what': 0.08, '': 0.07, 'X': 0.03}	1980	8.75443e-08	0.6875	0.980269	greedy	out-of-context	0.06	TRUE	TRUE	TRUE	target	{}
Mathematics	math_division5	50 is to 10 as 65 is to	13	x	0.69	0	0	{'x': 0.69, 'y': 0.09, '': 0.07, 'what': 0.06, 'X': 0.03}	2232	5.02914e-08	0.691406	0.977758	greedy	out-of-context	0.06	TRUE	TRUE	TRUE	target	{}
Mathematics	math_division5	80 is to 16 as 30 is to	6	x	0.69	0	0	{'x': 0.69, 'y': 0.09, '': 0.08, 'what': 0.05, 'X': 0.04}	1665	8.3819e-08	0.691406	0.983408	greedy	out-of-context	0.06	TRUE	TRUE	TRUE	target	{}
Mathematics	math_division5	85 is to 17 as 35 is to	7	x	0.69	0	0	{'x': 0.69, 'y': 0.1, 'what': 0.06, '': 0.06, 'X': 0.03}	999	1.98372e-07	0.691406	0.990045	greedy	out-of-context	0.06	TRUE	TRUE	TRUE	target	{}
Mathematics	math_division2	8 is to 4 as 84 is to	42	x	0.68	0	0	{'x': 0.68, 'y': 0.12, 'what': 0.06, '': 0.05, 'X': 0.03}	6473	1.55997e-08	0.683594	0.935497	greedy	out-of-context	0.06	TRUE	TRUE	TRUE	target	{}
Mathematics	math_division2	10 is to 5 as 24 is to	12	x	0.68	0	0	{'x': 0.68, 'y': 0.14, 'what': 0.07, 'X': 0.02, '': 0.02}	915	1.85333e-07	0.683594	0.990882	greedy	out-of-context	0.06	TRUE	TRUE	TRUE	target	{}
Mathematics	math_division2	96 is to 48 as 14 is to	7	x	0.68	0	0	{'x': 0.68, '': 0.13, 'y': 0.07, 'what': 0.06, '\\(': 0.02}	1390	1.44355e-07	0.675781	0.986149	greedy	out-of-context	0.06	TRUE	TRUE	TRUE	target	{}
Mathematics	math_division2	70 is to 35 as 56 is to	28	x	0.68	0	0	{'x': 0.68, 'y': 0.14, 'what': 0.07, '': 0.04, '\\(': 0.02}	3383	2.72412e-08	0.675781	0.966289	greedy	out-of-context	0.06	TRUE	TRUE	TRUE	target	{}
Mathematics	math_division2	70 is to 35 as 80 is to	40	x	0.68	0	0	{'x': 0.68, 'y': 0.16, 'what': 0.04, '': 0.04, '\\(': 0.02}	1020	1.25729e-07	0.675781	0.989836	greedy	out-of-context	0.06	TRUE	TRUE	TRUE	target	{}
Mathematics	math_double	75 is to 150 as 86 is to	172	x	0.67	0	0	{'x': 0.67, 'what': 0.13, 'y': 0.07, '': 0.06, 'X': 0.03}	7687	3.87081e-09	0.667969	0.9234	greedy	out-of-context	0.06	TRUE	TRUE	TRUE	target	{}
Mathematics	math_root	16 is to 4 as 36 is to	6	x	0.66	0	0	{'x': 0.66, 'y': 0.15, 'what': 0.09, '': 0.04, 'X': 0.02}	681	2.16067e-07	0.664062	0.993214	greedy	out-of-context	0.06	TRUE	TRUE	TRUE	target	{}
Mathematics	math_double	75 is to 150 as 92 is to	184	x	0.66	0	0	{'x': 0.66, 'what': 0.13, 'y': 0.07, '': 0.06, 'X': 0.03}	5872	5.38421e-09	0.660156	0.941486	greedy	out-of-context	0.06	TRUE	TRUE	TRUE	target	{}
Mathematics	math_division2	34 is to 17 as 92 is to	46	x	0.66	0	0	{'x': 0.66, 'y': 0.16, 'what': 0.05, '': 0.05, 'X': 0.02}	4514	1.68802e-08	0.664062	0.955018	greedy	out-of-context	0.06	TRUE	TRUE	TRUE	target	{}
Mathematics	math_division2	26 is to 13 as 92 is to	46	x	0.66	0	0	{'x': 0.66, 'y': 0.15, 'what': 0.07, 'X': 0.03, '': 0.03}	5479	9.02219e-09	0.664062	0.945402	greedy	out-of-context	0.06	TRUE	TRUE	TRUE	target	{}
Mathematics	math_division2	50 is to 25 as 56 is to	28	x	0.66	0	0	{'x': 0.66, 'y': 0.12, 'what': 0.08, '': 0.04, 'X': 0.03}	2922	3.07336e-08	0.664062	0.970882	greedy	out-of-context	0.06	TRUE	TRUE	TRUE	target	{}
Mathematics	math_division2	10 is to 5 as 36 is to	18	x	0.66	0	0	{'x': 0.66, 'y': 0.17, 'what': 0.08, '': 0.02, 'X': 0.02}	2175	5.33182e-08	0.65625	0.978326	greedy	out-of-context	0.06	TRUE	TRUE	TRUE	target	{}
Mathematics	math_division5	25 is to 5 as 35 is to	7	x	0.66	0	0	{'x': 0.66, 'y': 0.11, 'what': 0.09, '': 0.07, '\\(': 0.02}	650	3.09199e-07	0.664062	0.993523	greedy	out-of-context	0.06	TRUE	TRUE	TRUE	target	{}
Mathematics	math_division2	70 is to 35 as 28 is to	14	x	0.66	0	0	{'x': 0.66, 'y': 0.12, '': 0.08, 'what': 0.06, '\\(': 0.02}	1506	1.17347e-07	0.664062	0.984993	greedy	out-of-context	0.06	TRUE	TRUE	TRUE	target	{}
Mathematics	math_division2	70 is to 35 as 66 is to	33	x	0.66	0	0	{'x': 0.66, 'y': 0.13, 'what': 0.07, '': 0.05, '\\(': 0.02}	7249	8.78936e-09	0.664062	0.927764	greedy	out-of-context	0.06	TRUE	TRUE	TRUE	target	{}
Mathematics	math_division2	70 is to 35 as 92 is to	46	x	0.66	0	0	{'x': 0.66, 'y': 0.14, '': 0.06, 'what': 0.06, '\\(': 0.02}	6194	9.02219e-09	0.664062	0.938277	greedy	out-of-context	0.06	TRUE	TRUE	TRUE	target	{}
Mathematics	math_division2	62 is to 31 as 8 is to	4	x	0.66	0	0	{'x': 0.66, 'what': 0.13, 'y': 0.09, '': 0.06, 'X': 0.02}	576	4.06057e-07	0.65625	0.99426	greedy	out-of-context	0.06	TRUE	TRUE	TRUE	target	{}
Mathematics	math_division2	90 is to 45 as 82 is to	41	x	0.66	0	0	{'x': 0.66, 'y': 0.14, 'what': 0.07, '': 0.05, '\\(': 0.03}	9254	4.48199e-09	0.660156	0.907785	greedy	out-of-context	0.06	TRUE	TRUE	TRUE	target	{}
Mathematics	math_division2	80 is to 40 as 4 is to	2	x	0.66	0	0	{'x': 0.66, '': 0.18, 'what': 0.05, 'X': 0.03, 'y': 0.03}	546	5.51343e-07	0.664062	0.994559	greedy	out-of-context	0.06	TRUE	TRUE	TRUE	target	{}
Mathematics	math_division2	80 is to 40 as 64 is to	32	x	0.66	0	0	{'x': 0.66, 'y': 0.13, '': 0.07, 'what': 0.05, 'X': 0.03}	5043	1.851e-08	0.660156	0.949747	greedy	out-of-context	0.06	TRUE	TRUE	TRUE	target	{}
Mathematics	math_root	100 is to 10 as 36 is to	6	x	0.66	0	0	{'x': 0.66, 'y': 0.12, 'what': 0.09, '': 0.04, 'X': 0.03}	2021	9.31323e-08	0.65625	0.979861	greedy	out-of-context	0.06	TRUE	TRUE	TRUE	target	{}
Mathematics	math_division2	2 is to 1 as 24 is to	12	x	0.65	0	0	{'x': 0.65, '': 0.11, 'X': 0.07, 'y': 0.06, 'what': 0.04}	762	1.07288e-06	0.652343	0.992407	greedy	out-of-context	0.06	TRUE	TRUE	TRUE	target	{}
Mathematics	math_division2	14 is to 7 as 58 is to	29	x	0.65	0	0	{'x': 0.65, 'y': 0.13, 'what': 0.09, '': 0.05, 'X': 0.03}	5601	1.62981e-08	0.648437	0.944186	greedy	out-of-context	0.06	TRUE	TRUE	TRUE	target	{}
Mathematics	math_division2	8 is to 4 as 34 is to	17	x	0.65	0	0	{'x': 0.65, 'y': 0.12, 'what': 0.09, '': 0.06, 'X': 0.04}	2007	7.07805e-08	0.648437	0.98	greedy	out-of-context	0.06	TRUE	TRUE	TRUE	target	{}
Mathematics	math_division5	95 is to 19 as 70 is to	14	x	0.65	0	0	{'x': 0.65, 'y': 0.1, 'what': 0.09, '': 0.06, '\\(': 0.04}	1215	1.52737e-07	0.652344	0.987893	greedy	out-of-context	0.06	TRUE	TRUE	TRUE	target	{}
Mathematics	math_double	70 is to 140 as 18 is to	36	x	0.64	0	0	{'x': 0.64, '': 0.16, 'what': 0.06, 'y': 0.06, 'X': 0.04}	3206	2.01399e-08	0.644531	0.968052	greedy	out-of-context	0.06	TRUE	TRUE	TRUE	target	{}
Mathematics	math_division5	40 is to 8 as 35 is to	7	x	0.64	0	0	{'x': 0.64, 'y': 0.18, 'what': 0.08, '': 0.04, 'X': 0.01}	1207	1.45286e-07	0.636719	0.987972	greedy	out-of-context	0.06	TRUE	TRUE	TRUE	target	{}
Mathematics	math_double	4 is to 8 as 54 is to	108	x	0.64	0	0	{'x': 0.64, 'y': 0.12, 'what': 0.1, '': 0.06, 'X': 0.03}	2514	5.42495e-08	0.640625	0.974948	greedy	out-of-context	0.06	TRUE	TRUE	TRUE	target	{}
Mathematics	math_division2	70 is to 35 as 58 is to	29	x	0.64	0	0	{'x': 0.64, 'y': 0.12, '': 0.09, 'what': 0.08, 'X': 0.02}	3865	2.33995e-08	0.636719	0.961486	greedy	out-of-context	0.06	TRUE	TRUE	TRUE	target	{}
Mathematics	math_division2	86 is to 43 as 24 is to	12	x	0.64	0	0	{'x': 0.64, 'y': 0.16, 'what': 0.06, 'X': 0.04, '\\(': 0.03}	1235	1.09896e-07	0.640625	0.987693	greedy	out-of-context	0.06	TRUE	TRUE	TRUE	target	{}
Mathematics	math_division2	78 is to 39 as 14 is to	7	x	0.64	0	0	{'x': 0.64, '': 0.1, 'y': 0.09, 'what': 0.08, 'X': 0.02}	997	2.73809e-07	0.644531	0.990065	greedy	out-of-context	0.06	TRUE	TRUE	TRUE	target	{}
Mathematics	math_double	30 is to 60 as 95 is to	190	x	0.63	0	0	{'x': 0.63, '': 0.11, 'y': 0.09, 'what': 0.07, 'X': 0.05}	3256	1.96742e-08	0.632812	0.967554	greedy	out-of-context	0.06	TRUE	TRUE	TRUE	target	{}
Mathematics	math_double	22 is to 44 as 6 is to	12	x	0.63	0	0	{'x': 0.63, '': 0.12, 'what': 0.12, 'y': 0.04, 'X': 0.03}	267	2.14577e-06	0.628904	0.997339	greedy	out-of-context	0.06	TRUE	TRUE	TRUE	target	{}
Mathematics	math_double	85 is to 170 as 54 is to	108	x	0.63	0	0	{'x': 0.63, 'what': 0.12, '': 0.11, 'y': 0.08, 'X': 0.03}	2212	3.37604e-08	0.628906	0.977958	greedy	out-of-context	0.06	TRUE	TRUE	TRUE	target	{}
Mathematics	math_double	90 is to 180 as 92 is to	184	x	0.63	0	0	{'x': 0.63, 'y': 0.12, 'what': 0.11, '': 0.05, 'X': 0.02}	4088	1.67638e-08	0.632812	0.959263	greedy	out-of-context	0.06	TRUE	TRUE	TRUE	target	{}
Mathematics	math_division2	36 is to 18 as 12 is to	6	x	0.63	0	0	{'x': 0.63, 'y': 0.14, 'what': 0.1, '': 0.07, '\\(': 0.01}	1322	7.72998e-08	0.628906	0.986826	greedy	out-of-context	0.06	TRUE	TRUE	TRUE	target	{}
Mathematics	math_division2	20 is to 10 as 92 is to	46	x	0.63	0	0	{'x': 0.63, 'what': 0.1, 'y': 0.1, '': 0.09, 'X': 0.02}	6133	1.14087e-08	0.632812	0.938885	greedy	out-of-context	0.06	TRUE	TRUE	TRUE	target	{}
Mathematics	math_division2	10 is to 5 as 46 is to	23	x	0.63	0	0	{'x': 0.63, 'y': 0.12, 'what': 0.08, '': 0.07, 'X': 0.04}	2771	4.88944e-08	0.632812	0.972387	greedy	out-of-context	0.06	TRUE	TRUE	TRUE	target	{}
Mathematics	math_division2	96 is to 48 as 24 is to	12	x	0.63	0	0	{'x': 0.63, 'y': 0.12, 'what': 0.1, '': 0.05, '\\(': 0.03}	1305	1.44355e-07	0.632812	0.986996	greedy	out-of-context	0.06	TRUE	TRUE	TRUE	target	{}
Mathematics	math_division2	98 is to 49 as 14 is to	7	x	0.63	0	0	{'x': 0.63, '': 0.1, 'what': 0.1, 'y': 0.08, 'X': 0.02}	703	5.36442e-07	0.628906	0.992995	greedy	out-of-context	0.06	TRUE	TRUE	TRUE	target	{}
Mathematics	math_division2	86 is to 43 as 26 is to	13	x	0.63	0	0	{'x': 0.63, 'y': 0.19, '': 0.04, 'what': 0.04, '\\(': 0.03}	1455	8.2422e-08	0.632812	0.985501	greedy	out-of-context	0.06	TRUE	TRUE	TRUE	target	{}
Mathematics	math_division2	82 is to 41 as 14 is to	7	x	0.63	0	0	{'x': 0.63, 'y': 0.11, 'what': 0.09, '': 0.09, '\\(': 0.02}	776	3.44589e-07	0.632812	0.992267	greedy	out-of-context	0.06	TRUE	TRUE	TRUE	target	{}
Mathematics	math_double	40 is to 80 as 60 is to	120	x	0.62	0	0	{'x': 0.62, 'y': 0.17, '': 0.08, 'what': 0.06, 'X': 0.03}	364	5.40167e-07	0.617187	0.996373	greedy	out-of-context	0.06	TRUE	TRUE	TRUE	target	{}
Mathematics	math_double	96 is to 192 as 20 is to	40	x	0.62	0	0	{'x': 0.62, 'what': 0.12, '': 0.08, 'y': 0.06, 'X': 0.05}	808	2.36556e-07	0.621094	0.991948	greedy	out-of-context	0.06	TRUE	TRUE	TRUE	target	{}
Mathematics	math_double	100 is to 200 as 20 is to	40	x	0.62	0	0	{'x': 0.62, 'what': 0.11, 'X': 0.1, '': 0.07, 'y': 0.05}	533	2.90573e-07	0.625	0.994689	greedy	out-of-context	0.06	TRUE	TRUE	TRUE	target	{}
Mathematics	math_division2	26 is to 13 as 58 is to	29	x	0.62	0	0	{'x': 0.62, 'y': 0.15, 'what': 0.09, '': 0.04, 'X': 0.04}	3374	2.21189e-08	0.621094	0.966378	greedy	out-of-context	0.06	TRUE	TRUE	TRUE	target	{}
Mathematics	math_division2	48 is to 24 as 82 is to	41	x	0.62	0	0	{'x': 0.62, 'y': 0.13, 'what': 0.1, '': 0.06, 'X': 0.03}	9189	5.18048e-09	0.625	0.908432	greedy	out-of-context	0.06	TRUE	TRUE	TRUE	target	{}
Mathematics	math_division2	4 is to 2 as 28 is to	14	x	0.62	0	0	{'x': 0.62, 'y': 0.13, 'what': 0.09, '': 0.06, 'X': 0.04}	911	2.73809e-07	0.625	0.990922	greedy	out-of-context	0.06	TRUE	TRUE	TRUE	target	{}
Mathematics	math_division2	20 is to 10 as 28 is to	14	x	0.62	0	0	{'x': 0.62, 'y': 0.14, 'what': 0.11, '': 0.05, 'X': 0.02}	779	2.09548e-07	0.621094	0.992237	greedy	out-of-context	0.06	TRUE	TRUE	TRUE	target	{}
Mathematics	math_division2	20 is to 10 as 24 is to	12	x	0.62	0	0	{'x': 0.62, 'y': 0.16, 'what': 0.1, '': 0.04, 'X': 0.02}	971	1.60187e-07	0.617187	0.990324	greedy	out-of-context	0.06	TRUE	TRUE	TRUE	target	{}
Mathematics	math_division2	10 is to 5 as 58 is to	29	x	0.62	0	0	{'x': 0.62, 'y': 0.14, 'what': 0.09, '': 0.07, 'X': 0.03}	5225	1.92085e-08	0.625	0.947933	greedy	out-of-context	0.06	TRUE	TRUE	TRUE	target	{}
Mathematics	math_division2	10 is to 5 as 82 is to	41	x	0.62	0	0	{'x': 0.62, 'y': 0.13, 'what': 0.08, '': 0.07, 'X': 0.03}	11368	4.91855e-09	0.625	0.886719	greedy	out-of-context	0.06	TRUE	TRUE	TRUE	target	{}
Mathematics	math_double	2 is to 4 as 96 is to	192	x	0.62	0	0	{'x': 0.62, 'y': 0.1, '': 0.08, 'X': 0.08, 'what': 0.06}	3390	5.00586e-08	0.617187	0.966219	greedy	out-of-context	0.06	TRUE	TRUE	TRUE	target	{}
Mathematics	math_division2	72 is to 36 as 2 is to	1	x	0.62	0	0	{'x': 0.62, '': 0.26, 'what': 0.04, 'X': 0.03, 'y': 0.01}	275	2.25008e-06	0.624998	0.99726	greedy	out-of-context	0.06	TRUE	TRUE	TRUE	target	{}
Mathematics	math_division2	86 is to 43 as 90 is to	45	x	0.62	0	0	{'x': 0.62, 'y': 0.23, '\\(': 0.03, 'what': 0.03, 'X': 0.03}	3284	2.47965e-08	0.625	0.967275	greedy	out-of-context	0.06	TRUE	TRUE	TRUE	target	{}
Mathematics	math_double	40 is to 80 as 55 is to	110	x	0.61	0	0	{'x': 0.61, '': 0.14, 'y': 0.11, 'what': 0.05, 'X': 0.04}	505	3.78117e-07	0.609375	0.994968	greedy	out-of-context	0.06	TRUE	TRUE	TRUE	target	{}
Mathematics	math_double	34 is to 68 as 20 is to	40	x	0.61	0	0	{'x': 0.61, 'y': 0.2, 'what': 0.08, '\\(': 0.03, '': 0.03}	426	6.74278e-07	0.605468	0.995755	greedy	pair_values	0.06	TRUE	TRUE	TRUE	target	{}
Mathematics	math_double	52 is to 104 as 20 is to	40	x	0.61	0	0	{'x': 0.61, 'what': 0.15, '': 0.08, 'X': 0.06, 'y': 0.04}	679	3.25963e-07	0.605468	0.993234	greedy	out-of-context	0.06	TRUE	TRUE	TRUE	target	{}
Mathematics	math_double	12 is to 24 as 64 is to	128	x	0.61	0	0	{'x': 0.61, 'y': 0.11, 'what': 0.11, '': 0.07, 'X': 0.03}	5218	1.49012e-08	0.613281	0.948003	greedy	out-of-context	0.06	TRUE	TRUE	TRUE	target	{}
Mathematics	math_double	24 is to 48 as 72 is to	144	x	0.61	0	0	{'x': 0.61, 'y': 0.13, 'what': 0.1, '': 0.05, 'X': 0.04}	4595	1.72295e-08	0.613281	0.954211	greedy	out-of-context	0.06	TRUE	TRUE	TRUE	target	{}
Mathematics	math_double	95 is to 190 as 90 is to	180	x	0.61	0	0	{'x': 0.61, 'y': 0.12, 'what': 0.1, '\\(': 0.06, '': 0.05}	5491	1.69966e-08	0.605469	0.945283	greedy	out-of-context	0.06	TRUE	TRUE	TRUE	target	{}
Mathematics	math_double	60 is to 120 as 28 is to	56	x	0.61	0	0	{'x': 0.61, 'y': 0.13, 'what': 0.09, '': 0.09, 'X': 0.04}	3303	1.83936e-08	0.609375	0.967086	greedy	out-of-context	0.06	TRUE	TRUE	TRUE	target	{}
Mathematics	math_double	72 is to 144 as 54 is to	108	x	0.61	0	0	{'x': 0.61, 'what': 0.15, '': 0.09, 'y': 0.08, 'X': 0.02}	2154	3.65544e-08	0.609375	0.978536	greedy	out-of-context	0.06	TRUE	TRUE	TRUE	target	{}
Mathematics	math_division2	32 is to 16 as 84 is to	42	x	0.61	0	0	{'x': 0.61, 'what': 0.14, 'y': 0.09, '': 0.07, 'X': 0.04}	3456	3.63216e-08	0.613281	0.965561	greedy	out-of-context	0.06	TRUE	TRUE	TRUE	target	{}
Mathematics	math_division2	8 is to 4 as 22 is to	11	x	0.61	0	0	{'x': 0.61, 'y': 0.14, 'what': 0.1, '': 0.07, 'X': 0.03}	1225	1.28523e-07	0.613281	0.987793	greedy	out-of-context	0.06	TRUE	TRUE	TRUE	target	{}
Mathematics	math_division2	8 is to 4 as 92 is to	46	x	0.61	0	0	{'x': 0.61, 'y': 0.14, 'what': 0.08, '': 0.07, 'X': 0.03}	8146	9.66247e-09	0.613281	0.918826	greedy	out-of-context	0.06	TRUE	TRUE	TRUE	target	{}
Mathematics	math_division5	5 is to 1 as 60 is to	12	x	0.61	0	0	{'x': 0.61, '': 0.1, 'y': 0.07, 'X': 0.06, 'the': 0.04}	2325	2.99886e-07	0.613281	0.976832	greedy	out-of-context	0.06	TRUE	TRUE	TRUE	target	{}
Mathematics	math_double	2 is to 4 as 72 is to	144	x	0.61	0	0	{'x': 0.61, 'y': 0.1, '': 0.08, 'what': 0.08, 'X': 0.07}	3464	5.09899e-08	0.609375	0.965482	greedy	out-of-context	0.06	TRUE	TRUE	TRUE	target	{}
Mathematics	math_double	4 is to 8 as 20 is to	40	x	0.61	0	0	{'x': 0.61, 'y': 0.17, 'what': 0.1, 'X': 0.04, '': 0.04}	908	1.58325e-07	0.605469	0.990952	greedy	out-of-context	0.06	TRUE	TRUE	TRUE	target	{}
Mathematics	math_division2	68 is to 34 as 14 is to	7	x	0.61	0	0	{'x': 0.61, '': 0.15, 'what': 0.09, 'y': 0.07, 'X': 0.03}	812	4.30271e-07	0.605468	0.991908	greedy	out-of-context	0.06	TRUE	TRUE	TRUE	target	{}
Mathematics	math_double	50 is to 100 as 55 is to	110	x	0.6	0	0	{'x': 0.6, 'y': 0.11, '': 0.09, 'what': 0.08, 'X': 0.06}	1029	1.2666e-07	0.597656	0.989746	greedy	out-of-context	0.06	TRUE	TRUE	TRUE	target	{}
Mathematics	math_double	50 is to 100 as 78 is to	156	x	0.6	0	0	{'x': 0.6, 'what': 0.12, 'y': 0.09, '': 0.09, 'X': 0.05}	5394	9.83709e-09	0.601562	0.946249	greedy	out-of-context	0.06	TRUE	TRUE	TRUE	target	{}
Mathematics	math_double	90 is to 180 as 18 is to	36	x	0.6	0	0	{'x': 0.6, '': 0.12, 'what': 0.1, 'y': 0.08, 'X': 0.04}	2055	5.70435e-08	0.601562	0.979522	greedy	out-of-context	0.06	TRUE	TRUE	TRUE	target	{}
Mathematics	math_double	100 is to 200 as 28 is to	56	x	0.6	0	0	{'x': 0.6, 'what': 0.11, '': 0.1, 'X': 0.08, 'y': 0.07}	4970	9.95351e-09	0.597656	0.950474	greedy	out-of-context	0.06	TRUE	TRUE	TRUE	target	{}
Mathematics	math_double	65 is to 130 as 90 is to	180	x	0.6	0	0	{'x': 0.6, 'what': 0.13, 'y': 0.13, '\\(': 0.05, '': 0.04}	3684	1.39116e-08	0.597656	0.963289	greedy	out-of-context	0.06	TRUE	TRUE	TRUE	target	{}
Mathematics	math_division2	48 is to 24 as 92 is to	46	x	0.6	0	0	{'x': 0.6, 'y': 0.13, 'what': 0.11, '': 0.07, 'X': 0.03}	5053	1.59489e-08	0.597656	0.949647	greedy	out-of-context	0.06	TRUE	TRUE	TRUE	target	{}
Mathematics	math_cubes	4 is to 64 as 2 is to	8	x	0.6	0	0	{'x': 0.6, '': 0.14, 'what': 0.11, 'X': 0.06, 'y': 0.03}	478	1.22935e-06	0.597655	0.995237	greedy	out-of-context	0.06	TRUE	TRUE	TRUE	target	{}
Mathematics	math_division2	2 is to 1 as 90 is to	45	x	0.6	0	0	{'x': 0.6, '': 0.14, 'y': 0.06, 'X': 0.05, 'what': 0.04}	1852	3.33413e-07	0.601562	0.981545	greedy	out-of-context	0.06	TRUE	TRUE	TRUE	target	{}
Mathematics	math_division2	12 is to 6 as 92 is to	46	x	0.6	0	0	{'x': 0.6, 'y': 0.14, '': 0.11, 'what': 0.08, 'X': 0.02}	5831	1.35042e-08	0.597656	0.941895	greedy	out-of-context	0.06	TRUE	TRUE	TRUE	target	{}
Mathematics	math_double	40 is to 80 as 72 is to	144	x	0.59	0	0	{'x': 0.59, 'y': 0.16, 'what': 0.09, '': 0.08, 'X': 0.03}	5140	1.40863e-08	0.589844	0.94878	greedy	out-of-context	0.06	TRUE	TRUE	TRUE	target	{}
Mathematics	math_double	50 is to 100 as 28 is to	56	x	0.59	0	0	{'x': 0.59, 'y': 0.12, 'what': 0.11, '': 0.07, 'X': 0.05}	4814	1.33878e-08	0.589844	0.952029	greedy	out-of-context	0.06	TRUE	TRUE	TRUE	target	{}
Mathematics	math_double	50 is to 100 as 86 is to	172	x	0.59	0	0	{'x': 0.59, 'what': 0.13, 'y': 0.1, '': 0.07, 'X': 0.04}	10271	4.01633e-09	0.589844	0.89765	greedy	out-of-context	0.06	TRUE	TRUE	TRUE	target	{}
Mathematics	math_double	24 is to 48 as 14 is to	28	x	0.59	0	0	{'x': 0.59, 'what': 0.13, '': 0.13, 'y': 0.08, 'X': 0.03}	1552	8.5216e-08	0.585937	0.984534	greedy	out-of-context	0.06	TRUE	TRUE	TRUE	target	{}
Mathematics	math_double	65 is to 130 as 28 is to	56	x	0.59	0	0	{'x': 0.59, 'y': 0.12, 'what': 0.12, '': 0.08, 'X': 0.03}	3263	2.1304e-08	0.59375	0.967484	greedy	out-of-context	0.06	TRUE	TRUE	TRUE	target	{}
Mathematics	math_division2	96 is to 48 as 66 is to	33	x	0.59	0	0	{'x': 0.59, 'y': 0.15, 'what': 0.12, '': 0.06, '\\(': 0.02}	5198	1.5134e-08	0.585937	0.948202	greedy	out-of-context	0.06	TRUE	TRUE	TRUE	target	{}
Mathematics	math_double	2 is to 4 as 40 is to	80	x	0.59	0	0	{'x': 0.59, 'y': 0.1, 'X': 0.09, '': 0.08, 'what': 0.07}	2662	6.51926e-08	0.589844	0.973473	greedy	out-of-context	0.06	TRUE	TRUE	TRUE	target	{}
Mathematics	math_division2	86 is to 43 as 68 is to	34	x	0.59	0	0	{'x': 0.59, 'y': 0.21, 'what': 0.05, '': 0.03, 'Y': 0.03}	7510	6.28643e-09	0.59375	0.925163	greedy	out-of-context	0.06	TRUE	TRUE	TRUE	target	{}
Mathematics	math_double	50 is to 100 as 92 is to	184	x	0.58	0	0	{'x': 0.58, 'what': 0.14, 'y': 0.09, '': 0.08, 'X': 0.04}	9335	4.5693e-09	0.582031	0.906977	greedy	out-of-context	0.06	TRUE	TRUE	TRUE	target	{}
Mathematics	math_double	8 is to 16 as 54 is to	108	x	0.58	0	0	{'x': 0.58, 'what': 0.14, 'y': 0.11, '': 0.07, 'X': 0.05}	3140	3.95812e-08	0.578125	0.96871	greedy	out-of-context	0.06	TRUE	TRUE	TRUE	target	{}
Mathematics	math_double	24 is to 48 as 20 is to	40	x	0.58	0	0	{'x': 0.58, 'what': 0.14, 'y': 0.12, '': 0.06, 'X': 0.03}	1028	1.69501e-07	0.582031	0.989756	greedy	out-of-context	0.06	TRUE	TRUE	TRUE	target	{}
Mathematics	math_double	22 is to 44 as 44 is to	88		0.58	0	0	{'': 0.58, 'x': 0.12, 'what': 0.09, 'X': 0.05, 'the': 0.04}	2299	4.35859e-07	0.578125	0.977091	greedy	out-of-context	0.06	TRUE	TRUE	TRUE	target	{}
Mathematics	math_double	85 is to 170 as 95 is to	190	x	0.58	0	0	{'x': 0.58, 'what': 0.13, '': 0.12, 'y': 0.1, 'X': 0.02}	944	1.47149e-07	0.578125	0.990593	greedy	out-of-context	0.06	TRUE	TRUE	TRUE	target	{}
Mathematics	math_squares	24 is to 576 as 25 is to	625	x	0.58	0	0	{'x': 0.58, 'what': 0.13, '': 0.09, 'y': 0.07, 'X': 0.06}	2936	6.0536e-08	0.582031	0.970743	greedy	out-of-context	0.06	TRUE	TRUE	TRUE	target	{}
Mathematics	math_division2	4 is to 2 as 92 is to	46	x	0.58	0	0	{'x': 0.58, '': 0.12, 'what': 0.09, 'y': 0.09, 'X': 0.05}	4232	4.09782e-08	0.582031	0.957828	greedy	out-of-context	0.06	TRUE	TRUE	TRUE	target	{}
Mathematics	math_division2	16 is to 8 as 46 is to	23	x	0.58	0	0	{'x': 0.58, 'y': 0.15, 'what': 0.1, '': 0.1, 'X': 0.03}	2798	4.2608e-08	0.578125	0.972118	greedy	out-of-context	0.06	TRUE	TRUE	TRUE	target	{}
Mathematics	math_division2	8 is to 4 as 82 is to	41	x	0.58	0	0	{'x': 0.58, 'y': 0.13, 'what': 0.1, '': 0.09, 'X': 0.03}	9422	1.22236e-08	0.578125	0.90611	greedy	out-of-context	0.06	TRUE	TRUE	TRUE	target	{}
Mathematics	math_double	5 is to 10 as 72 is to	144	x	0.58	0	0	{'x': 0.58, 'y': 0.12, 'what': 0.12, '': 0.08, 'X': 0.04}	5803	1.35624e-08	0.582031	0.942174	greedy	out-of-context	0.06	TRUE	TRUE	TRUE	target	{}
Mathematics	math_double	48 is to 96 as 20 is to	40	x	0.57	0	0	{'x': 0.57, 'what': 0.15, '': 0.1, 'y': 0.06, 'X': 0.05}	692	3.03611e-07	0.574218	0.993104	greedy	out-of-context	0.06	TRUE	TRUE	TRUE	target	{}
Mathematics	math_double	24 is to 48 as 50 is to	100	x	0.57	0	0	{'x': 0.57, '': 0.11, 'y': 0.1, 'what': 0.09, 'X': 0.06}	646	3.44589e-07	0.566406	0.993563	greedy	out-of-context	0.06	TRUE	TRUE	TRUE	target	{}
Mathematics	math_double	90 is to 180 as 64 is to	128	x	0.57	0	0	{'x': 0.57, 'y': 0.13, 'what': 0.11, '': 0.08, 'X': 0.03}	4192	2.59606e-08	0.574219	0.958227	greedy	out-of-context	0.06	TRUE	TRUE	TRUE	target	{}
Mathematics	math_double	65 is to 130 as 92 is to	184	x	0.57	0	0	{'x': 0.57, 'y': 0.15, 'what': 0.13, '': 0.07, '\\(': 0.04}	5504	7.6252e-09	0.570312	0.945153	greedy	out-of-context	0.06	TRUE	TRUE	TRUE	target	{}
Mathematics	math_division2	26 is to 13 as 28 is to	14	x	0.57	0	0	{'x': 0.57, 'y': 0.21, 'what': 0.06, 'X': 0.04, '': 0.02}	1348	1.57394e-07	0.574219	0.986567	greedy	out-of-context	0.06	TRUE	TRUE	TRUE	target	{}
Mathematics	math_division2	24 is to 12 as 28 is to	14	x	0.57	0	0	{'x': 0.57, 'y': 0.15, 'what': 0.14, '': 0.04, 'X': 0.02}	885	2.01166e-07	0.570312	0.991181	greedy	out-of-context	0.06	TRUE	TRUE	TRUE	target	{}
Mathematics	math_double	2 is to 4 as 14 is to	28	x	0.57	0	0	{'x': 0.57, 'y': 0.12, 'what': 0.1, '': 0.08, 'X': 0.07}	2503	6.23986e-08	0.570312	0.975058	greedy	out-of-context	0.06	TRUE	TRUE	TRUE	target	{}
Mathematics	math_double	5 is to 10 as 55 is to	110	x	0.57	0	0	{'x': 0.57, 'what': 0.13, 'y': 0.12, '': 0.1, 'X': 0.03}	1955	7.26432e-08	0.570312	0.980519	greedy	out-of-context	0.06	TRUE	TRUE	TRUE	target	{}
Mathematics	math_division2	86 is to 43 as 78 is to	39	x	0.57	0	0	{'x': 0.57, 'y': 0.22, 'what': 0.07, '': 0.04, '\\(': 0.03}	2772	2.77068e-08	0.574219	0.972377	greedy	out-of-context	0.06	TRUE	TRUE	TRUE	target	{}
Mathematics	math_division2	78 is to 39 as 90 is to	45	x	0.57	0	0	{'x': 0.57, 'y': 0.21, 'what': 0.09, '': 0.04, 'X': 0.02}	2609	4.09782e-08	0.574219	0.974002	greedy	out-of-context	0.06	TRUE	TRUE	TRUE	target	{}
Mathematics	math_division2	78 is to 39 as 80 is to	40	x	0.57	0	0	{'x': 0.57, 'y': 0.2, 'what': 0.09, '': 0.03, 'X': 0.03}	2647	5.7742e-08	0.566406	0.973623	greedy	out-of-context	0.06	TRUE	TRUE	TRUE	target	{}
Mathematics	math_division2	24 is to 12 as 26 is to	13	x	0.56	0	0	{'x': 0.56, 'y': 0.16, 'what': 0.13, '': 0.05, 'X': 0.03}	1669	8.98726e-08	0.5625	0.983369	greedy	out-of-context	0.06	TRUE	TRUE	TRUE	target	{}
Mathematics	math_division2	22 is to 11 as 92 is to	46	x	0.56	0	0	{'x': 0.56, 'what': 0.14, 'y': 0.14, '': 0.06, '\\(': 0.03}	5083	2.35159e-08	0.558594	0.949348	greedy	out-of-context	0.06	TRUE	TRUE	TRUE	target	{}
Mathematics	math_cubes	4 is to 64 as 5 is to	125	x	0.56	0	0	{'x': 0.56, 'what': 0.12, '': 0.1, 'X': 0.09, 'y': 0.07}	7072	1.86265e-08	0.558594	0.929528	greedy	out-of-context	0.06	TRUE	TRUE	TRUE	target	{}
Mathematics	math_division2	16 is to 8 as 92 is to	46	x	0.56	0	0	{'x': 0.56, 'y': 0.17, 'what': 0.12, '': 0.08, 'X': 0.02}	3935	2.65427e-08	0.558594	0.960788	greedy	out-of-context	0.06	TRUE	TRUE	TRUE	target	{}
Mathematics	math_double	2 is to 4 as 64 is to	128	x	0.56	0	0	{'x': 0.56, 'y': 0.12, 'what': 0.09, 'X': 0.08, '': 0.08}	5305	2.7474e-08	0.558594	0.947136	greedy	out-of-context	0.06	TRUE	TRUE	TRUE	target	{}
Mathematics	math_double	4 is to 8 as 95 is to	190	x	0.56	0	0	{'x': 0.56, 'y': 0.11, 'what': 0.1, '': 0.09, 'X': 0.05}	5376	2.51457e-08	0.5625	0.946429	greedy	out-of-context	0.06	TRUE	TRUE	TRUE	target	{}
Mathematics	math_double	5 is to 10 as 54 is to	108	x	0.56	0	0	{'x': 0.56, 'what': 0.16, 'y': 0.12, '': 0.06, 'X': 0.03}	2706	4.23752e-08	0.558594	0.973035	greedy	out-of-context	0.06	TRUE	TRUE	TRUE	target	{}
Mathematics	math_division2	66 is to 33 as 90 is to	45	x	0.56	0	0	{'x': 0.56, 'y': 0.17, 'what': 0.12, '': 0.05, 'X': 0.03}	2528	5.68107e-08	0.558594	0.974809	greedy	out-of-context	0.06	TRUE	TRUE	TRUE	target	{}
Mathematics	math_double	8 is to 16 as 64 is to	128	x	0.55	0	0	{'x': 0.55, 'y': 0.14, 'what': 0.12, '': 0.06, 'X': 0.06}	5221	2.98023e-08	0.546875	0.947973	greedy	out-of-context	0.06	TRUE	TRUE	TRUE	target	{}
Mathematics	math_double	25 is to 50 as 35 is to	70	x	0.55	0	0	{'x': 0.55, 'y': 0.16, 'what': 0.11, '': 0.08, 'X': 0.04}	358	4.11645e-07	0.546875	0.996433	greedy	out-of-context	0.06	TRUE	TRUE	TRUE	target	{}
Mathematics	math_double	24 is to 48 as 55 is to	110	x	0.55	0	0	{'x': 0.55, '': 0.11, 'what': 0.11, 'y': 0.11, 'X': 0.05}	3158	3.70201e-08	0.554687	0.968531	greedy	out-of-context	0.06	TRUE	TRUE	TRUE	target	{}
Mathematics	math_double	85 is to 170 as 28 is to	56	x	0.55	0	0	{'x': 0.55, 'what': 0.15, 'y': 0.11, '': 0.11, 'X': 0.03}	3278	2.73576e-08	0.554687	0.967335	greedy	out-of-context	0.06	TRUE	TRUE	TRUE	target	{}
Mathematics	math_double	80 is to 160 as 28 is to	56	x	0.55	0	0	{'x': 0.55, '': 0.19, 'what': 0.08, 'y': 0.07, 'X': 0.06}	2714	3.49246e-08	0.550781	0.972955	greedy	out-of-context	0.06	TRUE	TRUE	TRUE	target	{}
Mathematics	math_double	84 is to 168 as 18 is to	36	x	0.55	0	0	{'x': 0.55, '': 0.17, 'what': 0.12, 'y': 0.07, 'X': 0.05}	1204	1.46218e-07	0.550781	0.988002	greedy	out-of-context	0.06	TRUE	TRUE	TRUE	target	{}
Mathematics	math_division2	36 is to 18 as 28 is to	14	x	0.55	0	0	{'x': 0.55, 'y': 0.18, 'what': 0.13, '': 0.06, 'X': 0.02}	1226	9.63919e-08	0.550781	0.987783	greedy	out-of-context	0.06	TRUE	TRUE	TRUE	target	{}
Mathematics	math_division2	38 is to 19 as 24 is to	12	x	0.55	0	0	{'x': 0.55, 'y': 0.17, 'what': 0.11, 'X': 0.05, '': 0.05}	1147	1.81608e-07	0.546875	0.98857	greedy	out-of-context	0.06	TRUE	TRUE	TRUE	target	{}
Mathematics	math_division2	56 is to 28 as 92 is to	46	x	0.55	0	0	{'x': 0.55, 'y': 0.16, 'what': 0.15, '': 0.07, 'X': 0.02}	2795	2.47965e-08	0.550781	0.972148	greedy	out-of-context	0.06	TRUE	TRUE	TRUE	target	{}
Mathematics	math_squares	10 is to 100 as 5 is to	25	x	0.55	0	0	{'x': 0.55, 'what': 0.17, 'y': 0.08, '': 0.08, 'X': 0.05}	873	2.49594e-07	0.554687	0.991301	greedy	out-of-context	0.06	TRUE	TRUE	TRUE	target	{}
Mathematics	math_division2	18 is to 9 as 56 is to	28	x	0.55	0	0	{'x': 0.55, 'y': 0.23, 'what': 0.12, '': 0.03, 'X': 0.02}	3475	2.18861e-08	0.554687	0.965372	greedy	out-of-context	0.06	TRUE	TRUE	TRUE	target	{}
Mathematics	math_division2	22 is to 11 as 58 is to	29	x	0.55	0	0	{'x': 0.55, 'y': 0.16, 'what': 0.13, '': 0.07, 'X': 0.02}	4459	2.93367e-08	0.550781	0.955566	greedy	out-of-context	0.06	TRUE	TRUE	TRUE	target	{}
Mathematics	math_division2	22 is to 11 as 32 is to	16	x	0.55	0	0	{'x': 0.55, 'y': 0.2, 'what': 0.1, '': 0.04, '\\(': 0.03}	326	1.40816e-06	0.546874	0.996751	greedy	out-of-context	0.06	TRUE	TRUE	TRUE	target	{}
Mathematics	math_division2	94 is to 47 as 28 is to	14	x	0.55	0	0	{'x': 0.55, 'y': 0.17, 'what': 0.11, '': 0.06, 'X': 0.03}	1085	1.70432e-07	0.550781	0.989188	greedy	out-of-context	0.06	TRUE	TRUE	TRUE	target	{}
Mathematics	math_double	5 is to 10 as 52 is to	104	x	0.55	0	0	{'x': 0.55, 'y': 0.13, 'what': 0.11, '': 0.1, 'X': 0.04}	6821	1.37952e-08	0.550781	0.932029	greedy	out-of-context	0.06	TRUE	TRUE	TRUE	target	{}
Mathematics	math_double	4 is to 8 as 28 is to	56	x	0.55	0	0	{'x': 0.55, 'y': 0.21, 'what': 0.11, '': 0.04, 'X': 0.03}	2704	3.91155e-08	0.546875	0.973055	greedy	out-of-context	0.06	TRUE	TRUE	TRUE	target	{}
Mathematics	math_double	4 is to 8 as 62 is to	124	x	0.55	0	0	{'x': 0.55, 'what': 0.13, 'y': 0.12, '': 0.09, 'X': 0.05}	9508	8.55653e-09	0.546875	0.905254	greedy	out-of-context	0.06	TRUE	TRUE	TRUE	target	{}
Mathematics	math_double	48 is to 96 as 72 is to	144	x	0.54	0	0	{'x': 0.54, 'what': 0.2, 'y': 0.13, '': 0.04, '\\(': 0.03}	5377	1.22818e-08	0.539062	0.946419	greedy	out-of-context	0.06	TRUE	TRUE	TRUE	target	{}
Mathematics	math_double	28 is to 56 as 90 is to	180	x	0.54	0	0	{'x': 0.54, 'what': 0.17, 'y': 0.14, '': 0.05, 'X': 0.04}	4007	2.30502e-08	0.542969	0.960071	greedy	out-of-context	0.06	TRUE	TRUE	TRUE	target	{}
Mathematics	math_double	18 is to 36 as 64 is to	128	x	0.54	0	0	{'x': 0.54, 'y': 0.18, 'what': 0.12, '': 0.06, 'X': 0.04}	5081	1.6531e-08	0.539062	0.949368	greedy	out-of-context	0.06	TRUE	TRUE	TRUE	target	{}
Mathematics	math_double	22 is to 44 as 86 is to	172	x	0.54	0	0	{'x': 0.54, 'y': 0.14, 'what': 0.13, '': 0.08, 'X': 0.04}	5925	1.89757e-08	0.535156	0.940958	greedy	out-of-context	0.06	TRUE	TRUE	TRUE	target	{}
Mathematics	math_double	86 is to 172 as 64 is to	128	x	0.54	0	0	{'x': 0.54, 'what': 0.15, '': 0.11, 'y': 0.11, 'X': 0.03}	3160	5.61122e-08	0.539062	0.968511	greedy	out-of-context	0.06	TRUE	TRUE	TRUE	target	{}
Mathematics	math_double	84 is to 168 as 54 is to	108	x	0.54	0	0	{'x': 0.54, 'what': 0.17, '': 0.14, 'y': 0.06, 'X': 0.05}	998	1.49012e-07	0.535156	0.990055	greedy	out-of-context	0.06	TRUE	TRUE	TRUE	target	{}
Mathematics	math_double	96 is to 192 as 18 is to	36	x	0.54	0	0	{'x': 0.54, 'what': 0.15, '': 0.13, 'y': 0.08, 'X': 0.03}	908	1.90921e-07	0.542969	0.990952	greedy	out-of-context	0.06	TRUE	TRUE	TRUE	target	{}
Mathematics	math_double	56 is to 112 as 72 is to	144	x	0.54	0	0	{'x': 0.54, 'what': 0.16, 'y': 0.16, '': 0.06, '\\(': 0.03}	2844	3.77186e-08	0.535156	0.97166	greedy	out-of-context	0.06	TRUE	TRUE	TRUE	target	{}
Mathematics	math_double	56 is to 112 as 90 is to	180	x	0.54	0	0	{'x': 0.54, 'what': 0.18, 'y': 0.13, '': 0.07, '\\(': 0.03}	3437	2.5495e-08	0.539062	0.965751	greedy	out-of-context	0.06	TRUE	TRUE	TRUE	target	{}
Mathematics	math_division2	34 is to 17 as 28 is to	14	x	0.54	0	0	{'x': 0.54, 'y': 0.22, 'what': 0.08, '': 0.06, '\\(': 0.04}	920	2.01166e-07	0.535156	0.990832	greedy	out-of-context	0.06	TRUE	TRUE	TRUE	target	{}
Mathematics	math_division2	32 is to 16 as 82 is to	41	x	0.54	0	0	{'x': 0.54, 'what': 0.16, '': 0.12, 'y': 0.08, 'X': 0.03}	7568	1.52504e-08	0.535156	0.924585	greedy	out-of-context	0.06	TRUE	TRUE	TRUE	target	{}
Mathematics	math_division2	48 is to 24 as 24 is to	12		0.54	0	0	{'': 0.54, 'x': 0.22, 'what': 0.07, 'X': 0.04, 'the': 0.03}	712	1.60187e-06	0.535155	0.992905	greedy	out-of-context	0.06	TRUE	TRUE	TRUE	target	{}
Mathematics	math_division2	4 is to 2 as 82 is to	41	x	0.54	0	0	{'x': 0.54, '': 0.13, 'what': 0.11, 'y': 0.1, 'X': 0.05}	8247	1.90921e-08	0.539062	0.917819	greedy	out-of-context	0.06	TRUE	TRUE	TRUE	target	{}
Mathematics	math_squares	8 is to 64 as 25 is to	625	x	0.54	0	0	{'x': 0.54, 'what': 0.17, 'y': 0.12, 'X': 0.06, '': 0.05}	10979	6.98492e-09	0.535156	0.890595	greedy	out-of-context	0.06	TRUE	TRUE	TRUE	target	{}
Mathematics	math_squares	2 is to 4 as 25 is to	625	x	0.54	0	0	{'x': 0.54, 'what': 0.1, 'y': 0.1, 'X': 0.09, '': 0.09}	7798	1.18744e-08	0.542969	0.922294	greedy	out-of-context	0.06	TRUE	TRUE	TRUE	target	{}
Mathematics	math_squares	16 is to 256 as 25 is to	625	x	0.54	0	0	{'x': 0.54, 'what': 0.17, 'y': 0.1, '': 0.06, 'X': 0.05}	6575	1.37952e-08	0.539062	0.934481	greedy	out-of-context	0.06	TRUE	TRUE	TRUE	target	{}
Mathematics	math_double	2 is to 4 as 28 is to	56	x	0.54	0	0	{'x': 0.54, 'y': 0.14, 'what': 0.1, '': 0.07, 'X': 0.07}	3224	4.5402e-08	0.542969	0.967873	greedy	out-of-context	0.06	TRUE	TRUE	TRUE	target	{}
Mathematics	math_double	5 is to 10 as 64 is to	128	x	0.54	0	0	{'x': 0.54, 'y': 0.16, 'what': 0.11, '': 0.08, 'X': 0.05}	5750	1.62981e-08	0.539062	0.942702	greedy	out-of-context	0.06	TRUE	TRUE	TRUE	target	{}
Mathematics	math_double	4 is to 8 as 10 is to	20	x	0.54	0	0	{'x': 0.54, 'y': 0.22, 'what': 0.12, '': 0.04, 'X': 0.03}	1085	1.37836e-07	0.539062	0.989188	greedy	out-of-context	0.06	TRUE	TRUE	TRUE	target	{}
Mathematics	math_division2	92 is to 46 as 12 is to	6	x	0.54	0	0	{'x': 0.54, 'what': 0.14, 'y': 0.13, '': 0.1, 'X': 0.02}	1211	2.34693e-07	0.535156	0.987932	greedy	out-of-context	0.06	TRUE	TRUE	TRUE	target	{}
Mathematics	math_double	46 is to 92 as 92 is to	184		0.53	0	0	{'': 0.53, 'x': 0.16, 'what': 0.1, 'the': 0.04, 'y': 0.04}	2332	3.12924e-07	0.53125	0.976762	greedy	out-of-context	0.06	TRUE	TRUE	TRUE	target	{}
Mathematics	math_division2	38 is to 19 as 52 is to	26	x	0.53	0	0	{'x': 0.53, 'y': 0.22, 'what': 0.08, 'X': 0.05, '': 0.05}	1893	7.54371e-08	0.527344	0.981136	greedy	out-of-context	0.06	TRUE	TRUE	TRUE	target	{}
Mathematics	math_division2	38 is to 19 as 92 is to	46	x	0.53	0	0	{'x': 0.53, 'y': 0.2, 'what': 0.12, '': 0.05, 'X': 0.04}	3047	3.05008e-08	0.53125	0.969637	greedy	out-of-context	0.06	TRUE	TRUE	TRUE	target	{}
Mathematics	math_squares	5 is to 25 as 16 is to	256	x	0.53	0	0	{'x': 0.53, 'what': 0.15, 'y': 0.12, '': 0.09, 'X': 0.06}	14022	3.18687e-09	0.527344	0.860272	greedy	out-of-context	0.06	TRUE	TRUE	TRUE	target	{}
Mathematics	math_division2	20 is to 10 as 22 is to	11	x	0.53	0	0	{'x': 0.53, 'what': 0.15, 'y': 0.14, '': 0.08, 'X': 0.03}	1151	1.82539e-07	0.527344	0.98853	greedy	out-of-context	0.06	TRUE	TRUE	TRUE	target	{}
Mathematics	math_division2	96 is to 48 as 56 is to	28	x	0.53	0	0	{'x': 0.53, 'y': 0.17, 'what': 0.14, '': 0.06, '\\(': 0.03}	3153	4.1211e-08	0.53125	0.968581	greedy	out-of-context	0.06	TRUE	TRUE	TRUE	target	{}
Mathematics	math_division2	72 is to 36 as 28 is to	14	x	0.53	0	0	{'x': 0.53, 'y': 0.16, 'what': 0.14, '': 0.08, '\\(': 0.03}	1369	1.30385e-07	0.527344	0.986358	greedy	out-of-context	0.06	TRUE	TRUE	TRUE	target	{}
Mathematics	math_division2	88 is to 44 as 90 is to	45	x	0.53	0	0	{'x': 0.53, 'y': 0.19, 'what': 0.13, '\\(': 0.03, '': 0.03}	2862	6.75209e-08	0.527344	0.97148	greedy	out-of-context	0.06	TRUE	TRUE	TRUE	target	{}
Mathematics	math_double	40 is to 80 as 92 is to	184	x	0.52	0	0	{'x': 0.52, 'y': 0.14, '': 0.14, 'what': 0.11, 'X': 0.04}	6004	1.01863e-08	0.519531	0.940171	greedy	out-of-context	0.06	TRUE	TRUE	TRUE	target	{}
Mathematics	math_double	8 is to 16 as 20 is to	40	x	0.52	0	0	{'x': 0.52, 'y': 0.19, 'what': 0.14, 'X': 0.05, '': 0.04}	1067	1.51806e-07	0.519531	0.989367	greedy	out-of-context	0.06	TRUE	TRUE	TRUE	target	{}
Mathematics	math_double	26 is to 52 as 64 is to	128	x	0.52	0	0	{'x': 0.52, 'y': 0.15, 'what': 0.14, 'X': 0.06, '': 0.05}	3953	4.28408e-08	0.519531	0.960609	greedy	out-of-context	0.06	TRUE	TRUE	TRUE	target	{}
Mathematics	math_double	26 is to 52 as 55 is to	110	x	0.52	0	0	{'x': 0.52, 'y': 0.16, 'what': 0.12, '': 0.07, 'X': 0.05}	2294	9.12696e-08	0.515625	0.97714	greedy	out-of-context	0.06	TRUE	TRUE	TRUE	target	{}
Mathematics	math_double	85 is to 170 as 64 is to	128	x	0.52	0	0	{'x': 0.52, 'what': 0.15, 'y': 0.14, '': 0.1, 'X': 0.02}	4442	1.94414e-08	0.523437	0.955736	greedy	out-of-context	0.06	TRUE	TRUE	TRUE	target	{}
Mathematics	math_double	96 is to 192 as 54 is to	108	x	0.52	0	0	{'x': 0.52, 'what': 0.19, '': 0.12, 'y': 0.08, 'X': 0.03}	1590	8.2422e-08	0.523437	0.984156	greedy	out-of-context	0.06	TRUE	TRUE	TRUE	target	{}
Mathematics	math_double	55 is to 110 as 35 is to	70	x	0.52	0	0	{'x': 0.52, 'y': 0.17, 'what': 0.17, '': 0.06, '\\(': 0.03}	767	1.84402e-07	0.523437	0.992357	greedy	out-of-context	0.06	TRUE	TRUE	TRUE	target	{}
Mathematics	math_division2	32 is to 16 as 24 is to	12	x	0.52	0	0	{'x': 0.52, 'what': 0.24, 'y': 0.1, '': 0.05, 'X': 0.04}	1038	2.15136e-07	0.515625	0.989656	greedy	out-of-context	0.06	TRUE	TRUE	TRUE	target	{}
Mathematics	math_division2	2 is to 1 as 34 is to	17	x	0.52	0	0	{'x': 0.52, '': 0.23, 'X': 0.07, 'y': 0.05, 'what': 0.05}	784	8.82894e-07	0.515624	0.992188	greedy	out-of-context	0.06	TRUE	TRUE	TRUE	target	{}
Mathematics	math_squares	10 is to 100 as 16 is to	256	x	0.52	0	0	{'x': 0.52, 'y': 0.15, 'what': 0.14, 'X': 0.06, '': 0.06}	10153	5.26779e-09	0.519531	0.898826	greedy	out-of-context	0.06	TRUE	TRUE	TRUE	target	{}
Mathematics	math_division2	18 is to 9 as 28 is to	14	x	0.52	0	0	{'x': 0.52, 'y': 0.24, 'what': 0.13, '': 0.04, 'X': 0.02}	709	2.19792e-07	0.519531	0.992935	greedy	out-of-context	0.06	TRUE	TRUE	TRUE	target	{}
Mathematics	math_division2	18 is to 9 as 92 is to	46	x	0.52	0	0	{'x': 0.52, 'y': 0.19, 'what': 0.12, '': 0.07, 'X': 0.02}	4417	2.16532e-08	0.523437	0.955985	greedy	out-of-context	0.06	TRUE	TRUE	TRUE	target	{}
Mathematics	math_double	4 is to 8 as 92 is to	184	x	0.52	0	0	{'x': 0.52, 'what': 0.14, 'y': 0.12, '': 0.1, 'X': 0.04}	7161	1.58325e-08	0.523437	0.928641	greedy	out-of-context	0.06	TRUE	TRUE	TRUE	target	{}
Mathematics	math_division2	64 is to 32 as 84 is to	42	x	0.52	0	0	{'x': 0.52, 'what': 0.14, 'y': 0.12, '': 0.06, 'X': 0.06}	1885	1.3411e-07	0.523437	0.981216	greedy	out-of-context	0.06	TRUE	TRUE	TRUE	target	{}
Mathematics	math_double	38 is to 76 as 95 is to	190	x	0.51	0	0	{'x': 0.51, 'y': 0.2, 'what': 0.1, '': 0.07, 'X': 0.04}	4495	2.39816e-08	0.507812	0.955208	greedy	out-of-context	0.06	TRUE	TRUE	TRUE	target	{}
Mathematics	math_double	10 is to 20 as 64 is to	128	x	0.51	0	0	{'x': 0.51, 'what': 0.12, 'y': 0.12, '': 0.11, 'X': 0.07}	2652	4.79631e-08	0.507812	0.973573	greedy	out-of-context	0.06	TRUE	TRUE	TRUE	target	{}
Mathematics	math_double	22 is to 44 as 35 is to	70	x	0.51	0	0	{'x': 0.51, 'what': 0.17, 'y': 0.13, '': 0.07, 'X': 0.04}	1183	2.00234e-07	0.507812	0.988211	greedy	out-of-context	0.06	TRUE	TRUE	TRUE	target	{}
Mathematics	math_double	96 is to 192 as 72 is to	144	x	0.51	0	0	{'x': 0.51, 'what': 0.2, 'y': 0.12, '': 0.06, '\\(': 0.04}	3541	2.82889e-08	0.511719	0.964714	greedy	out-of-context	0.06	TRUE	TRUE	TRUE	target	{}
Mathematics	math_double	64 is to 128 as 18 is to	36	x	0.51	0	0	{'x': 0.51, '': 0.15, 'what': 0.14, 'y': 0.07, 'X': 0.05}	2225	7.49715e-08	0.511719	0.977828	greedy	out-of-context	0.06	TRUE	TRUE	TRUE	target	{}
Mathematics	math_double	54 is to 108 as 72 is to	144	x	0.51	0	0	{'x': 0.51, 'y': 0.18, 'what': 0.17, '': 0.05, '\\(': 0.03}	3978	1.81608e-08	0.511719	0.96036	greedy	out-of-context	0.06	TRUE	TRUE	TRUE	target	{}
Mathematics	math_double	55 is to 110 as 18 is to	36	x	0.51	0	0	{'x': 0.51, 'what': 0.15, 'y': 0.14, '': 0.12, 'X': 0.02}	2280	4.88944e-08	0.507812	0.97728	greedy	out-of-context	0.06	TRUE	TRUE	TRUE	target	{}
Mathematics	math_division2	52 is to 26 as 2 is to	1	x	0.51	0	0	{'x': 0.51, '': 0.31, 'what': 0.06, 'X': 0.05, 'y': 0.03}	146	1.38283e-05	0.507799	0.998545	greedy	out-of-context	0.06	TRUE	TRUE	TRUE	target	{}
Mathematics	math_division2	96 is to 48 as 92 is to	46	x	0.51	0	0	{'x': 0.51, 'what': 0.17, 'y': 0.15, '': 0.08, '\\(': 0.02}	3192	4.58676e-08	0.507812	0.968192	greedy	out-of-context	0.06	TRUE	TRUE	TRUE	target	{}
Mathematics	math_division2	98 is to 49 as 24 is to	12	x	0.51	0	0	{'x': 0.51, 'what': 0.16, 'y': 0.14, '': 0.08, 'X': 0.03}	1097	2.73809e-07	0.511718	0.989068	greedy	out-of-context	0.06	TRUE	TRUE	TRUE	target	{}
Mathematics	math_double	2 is to 4 as 95 is to	190	x	0.51	0	0	{'x': 0.51, '': 0.15, 'what': 0.09, 'y': 0.09, 'X': 0.08}	5730	2.82889e-08	0.507812	0.942901	greedy	out-of-context	0.06	TRUE	TRUE	TRUE	target	{}
Mathematics	math_double	5 is to 10 as 62 is to	124	x	0.51	0	0	{'x': 0.51, 'what': 0.15, 'y': 0.12, '': 0.1, 'X': 0.05}	13468	3.56522e-09	0.511719	0.865792	greedy	out-of-context	0.06	TRUE	TRUE	TRUE	target	{}
Mathematics	math_double	4 is to 8 as 16 is to	32	x	0.51	0	0	{'x': 0.51, 'y': 0.23, 'what': 0.12, 'X': 0.04, '': 0.04}	3262	3.63216e-08	0.507812	0.967494	greedy	out-of-context	0.06	TRUE	TRUE	TRUE	target	{}
Mathematics	math_division2	74 is to 37 as 56 is to	28	x	0.51	0	0	{'x': 0.51, 'y': 0.18, 'what': 0.14, '': 0.05, 'X': 0.03}	2557	4.51691e-08	0.511719	0.97452	greedy	out-of-context	0.06	TRUE	TRUE	TRUE	target	{}
Mathematics	math_division2	76 is to 38 as 26 is to	13	x	0.51	0	0	{'x': 0.51, 'y': 0.22, 'what': 0.11, '': 0.07, '\\(': 0.02}	1734	7.77654e-08	0.511719	0.982721	greedy	out-of-context	0.06	TRUE	TRUE	TRUE	target	{}
Mathematics	math_double	44 is to 88 as 20 is to	40	x	0.5	0	0	{'x': 0.5, 'what': 0.16, '': 0.13, 'y': 0.11, 'X': 0.04}	508	6.74278e-07	0.503906	0.994938	greedy	out-of-context	0.06	TRUE	TRUE	TRUE	target	{}
Mathematics	math_double	8 is to 16 as 48 is to	96	x	0.5	0	0	{'x': 0.5, 'y': 0.16, 'what': 0.15, 'X': 0.06, '': 0.06}	6002	1.60653e-08	0.503906	0.940191	greedy	out-of-context	0.06	TRUE	TRUE	TRUE	target	{}
Mathematics	math_double	20 is to 40 as 92 is to	184	x	0.5	0	0	{'x': 0.5, '': 0.19, 'what': 0.11, 'y': 0.1, 'X': 0.04}	6682	7.91624e-09	0.5	0.933414	greedy	out-of-context	0.06	TRUE	TRUE	TRUE	target	{}
Mathematics	math_double	96 is to 192 as 2 is to	4	x	0.5	0	0	{'x': 0.5, '': 0.33, 'what': 0.09, 'X': 0.02, 'y': 0.02}	194	3.42727e-06	0.499997	0.998067	greedy	out-of-context	0.06	TRUE	TRUE	TRUE	target	{}
Mathematics	math_double	58 is to 116 as 72 is to	144	x	0.5	0	0	{'x': 0.5, 'y': 0.21, 'what': 0.17, '': 0.05, '\\(': 0.02}	5518	1.43773e-08	0.503906	0.945014	greedy	out-of-context	0.06	TRUE	TRUE	TRUE	target	{}
Mathematics	math_double	68 is to 136 as 18 is to	36	x	0.5	0	0	{'x': 0.5, '': 0.2, 'what': 0.15, 'y': 0.06, 'X': 0.04}	1025	1.83471e-07	0.503906	0.989786	greedy	out-of-context	0.06	TRUE	TRUE	TRUE	target	{}
Mathematics	math_division2	36 is to 18 as 18 is to	9		0.5	0	0	{'': 0.5, 'x': 0.28, 'what': 0.08, 'X': 0.04, 'y': 0.02}	1587	2.68221e-07	0.5	0.984186	greedy	out-of-context	0.06	TRUE	TRUE	TRUE	target	{}
Mathematics	math_division2	38 is to 19 as 68 is to	34	x	0.5	0	0	{'x': 0.5, 'y': 0.2, 'what': 0.12, '': 0.06, 'X': 0.04}	6313	1.5134e-08	0.5	0.937091	greedy	out-of-context	0.06	TRUE	TRUE	TRUE	target	{}
Mathematics	math_squares	25 is to 625 as 16 is to	256	x	0.5	0	0	{'x': 0.5, '': 0.16, 'what': 0.14, 'y': 0.07, 'X': 0.05}	5231	1.93249e-08	0.496094	0.947873	greedy	out-of-context	0.06	TRUE	TRUE	TRUE	target	{}
Mathematics	math_division2	66 is to 33 as 82 is to	41	x	0.5	0	0	{'x': 0.5, 'y': 0.18, 'what': 0.16, '': 0.07, 'X': 0.03}	5411	1.80444e-08	0.496094	0.94608	greedy	out-of-context	0.06	TRUE	TRUE	TRUE	target	{}
Mathematics	math_division2	78 is to 39 as 28 is to	14	x	0.5	0	0	{'x': 0.5, 'y': 0.17, 'what': 0.14, '': 0.08, 'X': 0.03}	1147	2.28174e-07	0.503906	0.98857	greedy	out-of-context	0.06	TRUE	TRUE	TRUE	target	{}
Mathematics	math_division2	78 is to 39 as 92 is to	46	x	0.5	0	0	{'x': 0.5, 'y': 0.21, 'what': 0.13, '': 0.07, 'X': 0.03}	3422	2.67755e-08	0.496094	0.9659	greedy	out-of-context	0.06	TRUE	TRUE	TRUE	target	{}
Mathematics	math_division2	76 is to 38 as 24 is to	12	x	0.5	0	0	{'x': 0.5, 'y': 0.22, 'what': 0.15, '': 0.05, '\\(': 0.02}	1321	1.06636e-07	0.496094	0.986836	greedy	out-of-context	0.06	TRUE	TRUE	TRUE	target	{}
Mathematics	math_division2	82 is to 41 as 64 is to	32	x	0.5	0	0	{'x': 0.5, 'y': 0.22, 'what': 0.12, '': 0.06, '\\(': 0.03}	3952	2.57278e-08	0.496094	0.960619	greedy	out-of-context	0.06	TRUE	TRUE	TRUE	target	{}
Mathematics	math_double	38 is to 76 as 54 is to	108	x	0.49	0	0	{'x': 0.49, 'y': 0.18, 'what': 0.16, '': 0.07, 'X': 0.03}	1924	6.33299e-08	0.492187	0.980827	greedy	out-of-context	0.06	TRUE	TRUE	TRUE	target	{}
Mathematics	math_double	8 is to 16 as 28 is to	56	x	0.49	0	0	{'x': 0.49, 'y': 0.17, 'what': 0.16, '': 0.06, 'X': 0.06}	3138	4.63333e-08	0.490234	0.96873	greedy	out-of-context	0.06	TRUE	TRUE	TRUE	target	{}
Mathematics	math_double	5 is to 10 as 92 is to	184	x	0.49	0	0	{'x': 0.49, 'what': 0.16, '': 0.12, 'y': 0.12, 'X': 0.04}	11385	5.26779e-09	0.486328	0.886549	greedy	out-of-context	0.06	TRUE	TRUE	TRUE	target	{}
Mathematics	math_double	5 is to 10 as 86 is to	172	x	0.49	0	0	{'x': 0.49, 'what': 0.15, 'y': 0.14, '': 0.11, 'X': 0.04}	11144	6.49015e-09	0.492187	0.888951	greedy	out-of-context	0.06	TRUE	TRUE	TRUE	target	{}
Mathematics	math_double	25 is to 50 as 28 is to	56	x	0.49	0	0	{'x': 0.49, 'y': 0.19, 'what': 0.14, '': 0.08, 'X': 0.04}	2125	3.23635e-08	0.492187	0.978825	greedy	out-of-context	0.06	TRUE	TRUE	TRUE	target	{}
Mathematics	math_double	58 is to 116 as 64 is to	128	x	0.49	0	0	{'x': 0.49, 'y': 0.26, 'what': 0.11, '': 0.06, 'Y': 0.02}	5310	2.02563e-08	0.488281	0.947086	greedy	out-of-context	0.06	TRUE	TRUE	TRUE	target	{}
Mathematics	math_double	68 is to 136 as 54 is to	108	x	0.49	0	0	{'x': 0.49, 'what': 0.23, '': 0.13, 'y': 0.08, 'X': 0.03}	1537	9.82545e-08	0.492187	0.984684	greedy	out-of-context	0.06	TRUE	TRUE	TRUE	target	{}
Mathematics	math_division2	42 is to 21 as 92 is to	46	x	0.49	0	0	{'x': 0.49, 'y': 0.18, 'what': 0.14, '': 0.08, '\\(': 0.04}	4207	2.09548e-08	0.486328	0.958078	greedy	out-of-context	0.06	TRUE	TRUE	TRUE	target	{}
Mathematics	math_squares	8 is to 64 as 16 is to	256	x	0.49	0	0	{'x': 0.49, 'y': 0.18, 'what': 0.14, 'X': 0.06, '': 0.06}	8361	1.36206e-08	0.486328	0.916683	greedy	out-of-context	0.06	TRUE	TRUE	TRUE	target	{}
Mathematics	math_double	5 is to 10 as 38 is to	76	x	0.49	0	0	{'x': 0.49, 'what': 0.15, 'y': 0.14, '': 0.1, 'X': 0.05}	10423	4.80213e-09	0.492187	0.896136	greedy	out-of-context	0.06	TRUE	TRUE	TRUE	target	{}
Mathematics	math_division2	66 is to 33 as 12 is to	6	x	0.49	0	0	{'x': 0.49, 'what': 0.2, 'y': 0.11, '': 0.1, 'X': 0.03}	1739	1.4063e-07	0.488281	0.982671	greedy	out-of-context	0.06	TRUE	TRUE	TRUE	target	{}
Mathematics	math_division2	92 is to 46 as 28 is to	14	x	0.49	0	0	{'x': 0.49, 'what': 0.18, 'y': 0.17, '': 0.07, '\\(': 0.03}	987	2.16998e-07	0.486328	0.990165	greedy	out-of-context	0.06	TRUE	TRUE	TRUE	target	{}
Mathematics	math_double	54 is to 108 as 28 is to	56	x	0.48	0	0	{'x': 0.48, 'what': 0.2, 'y': 0.14, '': 0.09, 'X': 0.03}	2059	5.61122e-08	0.482422	0.979482	greedy	out-of-context	0.06	TRUE	TRUE	TRUE	target	{}
Mathematics	math_double	26 is to 52 as 86 is to	172	x	0.48	0	0	{'x': 0.48, 'what': 0.2, 'y': 0.13, '': 0.08, 'X': 0.05}	3205	5.89062e-08	0.476562	0.968062	greedy	out-of-context	0.06	TRUE	TRUE	TRUE	target	{}
Mathematics	math_double	82 is to 164 as 90 is to	180	x	0.48	0	0	{'x': 0.48, 'what': 0.26, 'y': 0.12, '': 0.08, '\\(': 0.02}	2775	5.33182e-08	0.480469	0.972347	greedy	out-of-context	0.06	TRUE	TRUE	TRUE	target	{}
Mathematics	math_double	55 is to 110 as 76 is to	152	x	0.48	0	0	{'x': 0.48, 'y': 0.19, 'what': 0.19, '': 0.07, '\\(': 0.03}	14625	2.32831e-09	0.480469	0.854263	greedy	out-of-context	0.06	TRUE	TRUE	TRUE	target	{}
Mathematics	math_double	55 is to 110 as 72 is to	144	x	0.48	0	0	{'x': 0.48, 'y': 0.23, 'what': 0.16, '': 0.05, '\\(': 0.04}	5981	1.24564e-08	0.480469	0.9404	greedy	out-of-context	0.06	TRUE	TRUE	TRUE	target	{}
Mathematics	math_double	56 is to 112 as 64 is to	128	x	0.48	0	0	{'x': 0.48, 'y': 0.16, 'what': 0.15, '': 0.1, '\\(': 0.03}	2437	6.33299e-08	0.476562	0.975715	greedy	out-of-context	0.06	TRUE	TRUE	TRUE	target	{}
Mathematics	math_division2	38 is to 19 as 58 is to	29	x	0.48	0	0	{'x': 0.48, 'y': 0.2, 'what': 0.13, '': 0.08, 'X': 0.04}	1718	9.12696e-08	0.476562	0.98288	greedy	out-of-context	0.06	TRUE	TRUE	TRUE	target	{}
Mathematics	math_division2	98 is to 49 as 22 is to	11	x	0.48	0	0	{'x': 0.48, 'what': 0.15, '': 0.14, 'y': 0.12, '\\(': 0.02}	1707	1.73226e-07	0.484375	0.98299	greedy	out-of-context	0.06	TRUE	TRUE	TRUE	target	{}
Mathematics	math_double	2 is to 4 as 86 is to	172	x	0.48	0	0	{'x': 0.48, '': 0.15, 'what': 0.12, 'y': 0.1, 'X': 0.07}	8298	1.95578e-08	0.478516	0.917311	greedy	out-of-context	0.06	TRUE	TRUE	TRUE	target	{}
Mathematics	math_division2	88 is to 44 as 22 is to	11	x	0.48	0	0	{'x': 0.48, '': 0.15, 'y': 0.13, 'what': 0.12, '\\(': 0.04}	1848	1.74157e-07	0.478515	0.981585	greedy	out-of-context	0.06	TRUE	TRUE	TRUE	target	{}
Mathematics	math_division2	92 is to 46 as 24 is to	12	x	0.48	0	0	{'x': 0.48, 'what': 0.19, 'y': 0.15, '': 0.08, '\\(': 0.03}	986	2.58908e-07	0.482422	0.990175	greedy	out-of-context	0.06	TRUE	TRUE	TRUE	target	{}
Mathematics	math_division2	78 is to 39 as 40 is to	20	x	0.48	0	0	{'x': 0.48, 'y': 0.21, 'what': 0.09, '': 0.08, 'X': 0.03}	3212	5.14556e-08	0.480469	0.967993	greedy	out-of-context	0.06	TRUE	TRUE	TRUE	target	{}
Mathematics	math_division2	76 is to 38 as 92 is to	46	x	0.48	0	0	{'x': 0.48, 'y': 0.28, 'what': 0.11, '': 0.05, '\\(': 0.02}	2750	2.4098e-08	0.484375	0.972596	greedy	out-of-context	0.06	TRUE	TRUE	TRUE	target	{}
Mathematics	math_division2	76 is to 38 as 82 is to	41	x	0.48	0	0	{'x': 0.48, 'y': 0.29, 'what': 0.12, '': 0.05, '\\(': 0.02}	5471	1.04192e-08	0.476562	0.945482	greedy	out-of-context	0.06	TRUE	TRUE	TRUE	target	{}
Mathematics	math_division2	76 is to 38 as 56 is to	28	x	0.48	0	0	{'x': 0.48, 'y': 0.25, 'what': 0.14, '': 0.04, '\\(': 0.02}	2544	3.3062e-08	0.484375	0.974649	greedy	out-of-context	0.06	TRUE	TRUE	TRUE	target	{}
Mathematics	math_division2	82 is to 41 as 22 is to	11	x	0.48	0	0	{'x': 0.48, 'y': 0.17, '': 0.13, 'what': 0.13, '\\(': 0.03}	1414	1.70432e-07	0.476562	0.98591	greedy	out-of-context	0.06	TRUE	TRUE	TRUE	target	{}
Mathematics	math_double	10 is to 20 as 76 is to	152	x	0.47	0	0	{'x': 0.47, 'what': 0.17, '': 0.16, 'y': 0.08, 'X': 0.06}	12672	3.46336e-09	0.474609	0.873724	greedy	out-of-context	0.06	TRUE	TRUE	TRUE	target	{}
Mathematics	math_double	22 is to 44 as 92 is to	184	x	0.47	0	0	{'x': 0.47, 'what': 0.18, 'y': 0.11, '': 0.1, 'X': 0.05}	6264	2.08383e-08	0.46875	0.93758	greedy	out-of-context	0.06	TRUE	TRUE	TRUE	target	{}
Mathematics	math_double	54 is to 108 as 64 is to	128	x	0.47	0	0	{'x': 0.47, 'y': 0.21, 'what': 0.12, '': 0.08, '\\(': 0.04}	4945	2.32831e-08	0.466797	0.950723	greedy	out-of-context	0.06	TRUE	TRUE	TRUE	target	{}
Mathematics	math_double	68 is to 136 as 72 is to	144	x	0.47	0	0	{'x': 0.47, 'y': 0.22, 'what': 0.18, '': 0.05, '\\(': 0.02}	4749	2.07219e-08	0.474609	0.952677	greedy	out-of-context	0.06	TRUE	TRUE	TRUE	target	{}
Mathematics	math_division2	54 is to 27 as 56 is to	28	x	0.47	0	0	{'x': 0.47, 'y': 0.22, 'what': 0.11, '': 0.07, 'X': 0.04}	1943	1.0943e-07	0.474609	0.980638	greedy	out-of-context	0.06	TRUE	TRUE	TRUE	target	{}
Mathematics	math_double	44 is to 88 as 16 is to	32	x	0.46	0	0	{'x': 0.46, '': 0.17, 'what': 0.14, 'y': 0.13, 'X': 0.03}	1317	2.23517e-07	0.457031	0.986876	greedy	out-of-context	0.06	TRUE	TRUE	TRUE	target	{}
Mathematics	math_double	16 is to 32 as 90 is to	180	x	0.46	0	0	{'x': 0.46, 'what': 0.18, '': 0.13, 'y': 0.1, 'X': 0.05}	3224	3.9814e-08	0.462891	0.967873	greedy	out-of-context	0.06	TRUE	TRUE	TRUE	target	{}
Mathematics	math_double	10 is to 20 as 28 is to	56	x	0.46	0	0	{'x': 0.46, 'what': 0.19, 'y': 0.15, '': 0.07, 'X': 0.07}	2706	3.37604e-08	0.455078	0.973035	greedy	out-of-context	0.06	TRUE	TRUE	TRUE	target	{}
Mathematics	math_double	78 is to 156 as 72 is to	144	x	0.46	0	0	{'x': 0.46, 'what': 0.21, 'y': 0.17, '': 0.08, 'X': 0.02}	4800	1.82772e-08	0.460937	0.952168	greedy	out-of-context	0.06	TRUE	TRUE	TRUE	target	{}
Mathematics	math_root	64 is to 8 as 36 is to	6	x	0.46	0	0	{'x': 0.46, 'y': 0.22, 'what': 0.2, '': 0.03, 'X': 0.02}	1365	1.76951e-07	0.464844	0.986398	greedy	out-of-context	0.06	TRUE	TRUE	TRUE	target	{}
Mathematics	math_double	55 is to 110 as 92 is to	184	x	0.46	0	0	{'x': 0.46, 'y': 0.19, 'what': 0.19, '': 0.07, '\\(': 0.03}	7742	6.95582e-09	0.460937	0.922852	greedy	out-of-context	0.06	TRUE	TRUE	TRUE	target	{}
Mathematics	math_double	55 is to 110 as 64 is to	128	x	0.46	0	0	{'x': 0.46, 'y': 0.25, 'what': 0.14, '': 0.06, '\\(': 0.03}	5553	1.80444e-08	0.457031	0.944665	greedy	out-of-context	0.06	TRUE	TRUE	TRUE	target	{}
Mathematics	math_double	68 is to 136 as 35 is to	70	x	0.46	0	0	{'x': 0.46, 'what': 0.21, '': 0.17, 'y': 0.07, 'X': 0.04}	788	3.33413e-07	0.458984	0.992148	greedy	out-of-context	0.06	TRUE	TRUE	TRUE	target	{}
Mathematics	math_double	66 is to 132 as 72 is to	144	x	0.46	0	0	{'x': 0.46, 'y': 0.21, 'what': 0.16, '': 0.07, '\\(': 0.03}	5584	1.89757e-08	0.457031	0.944356	greedy	out-of-context	0.06	TRUE	TRUE	TRUE	target	{}
Mathematics	math_double	2 is to 4 as 92 is to	184	x	0.46	0	0	{'x': 0.46, '': 0.16, 'what': 0.13, 'y': 0.09, 'X': 0.07}	7243	2.24682e-08	0.462891	0.927824	greedy	out-of-context	0.06	TRUE	TRUE	TRUE	target	{}
Mathematics	math_double	32 is to 64 as 55 is to	110	x	0.45	0	0	{'x': 0.45, 'what': 0.18, '': 0.14, 'y': 0.08, 'X': 0.07}	1803	1.49012e-07	0.451172	0.982033	greedy	out-of-context	0.06	TRUE	TRUE	TRUE	target	{}
Mathematics	math_double	8 is to 16 as 12 is to	24	x	0.45	0	0	{'x': 0.45, 'y': 0.21, 'what': 0.19, '': 0.05, 'X': 0.04}	577	3.53903e-07	0.445312	0.99425	greedy	out-of-context	0.06	TRUE	TRUE	TRUE	target	{}
Mathematics	math_double	84 is to 168 as 72 is to	144	x	0.45	0	0	{'x': 0.45, 'what': 0.21, 'y': 0.13, '': 0.1, 'X': 0.04}	3688	3.91155e-08	0.453125	0.963249	greedy	out-of-context	0.06	TRUE	TRUE	TRUE	target	{}
Mathematics	math_double	92 is to 184 as 28 is to	56	x	0.45	0	0	{'x': 0.45, 'what': 0.32, 'y': 0.1, '': 0.08, 'X': 0.02}	1170	1.11293e-07	0.449219	0.988341	greedy	out-of-context	0.06	TRUE	TRUE	TRUE	target	{}
Mathematics	math_division2	74 is to 37 as 58 is to	29	x	0.45	0	0	{'x': 0.45, 'what': 0.19, 'y': 0.16, '': 0.1, 'X': 0.03}	2330	5.26197e-08	0.453125	0.976782	greedy	out-of-context	0.06	TRUE	TRUE	TRUE	target	{}
Mathematics	math_double	16 is to 32 as 64 is to	128	x	0.44	0	0	{'x': 0.44, 'what': 0.18, 'y': 0.17, '': 0.06, 'X': 0.06}	2878	6.47269e-08	0.435547	0.971321	greedy	out-of-context	0.06	TRUE	TRUE	TRUE	target	{}
Mathematics	math_double	94 is to 188 as 18 is to	36	x	0.44	0	0	{'x': 0.44, 'what': 0.2, '': 0.17, 'y': 0.09, 'X': 0.04}	1958	1.08965e-07	0.443359	0.980489	greedy	out-of-context	0.06	TRUE	TRUE	TRUE	target	{}
Mathematics	math_double	38 is to 76 as 64 is to	128	x	0.43	0	0	{'x': 0.43, 'y': 0.24, 'what': 0.13, '': 0.07, 'X': 0.04}	5905	2.03727e-08	0.427734	0.941157	greedy	out-of-context	0.06	TRUE	TRUE	TRUE	target	{}
Mathematics	math_double	44 is to 88 as 95 is to	190	x	0.43	0	0	{'x': 0.43, 'y': 0.2, 'what': 0.15, '': 0.1, '\\(': 0.03}	3831	4.47035e-08	0.429687	0.961824	greedy	out-of-context	0.06	TRUE	TRUE	TRUE	target	{}
Mathematics	math_double	22 is to 44 as 2 is to	4	x	0.43	0	0	{'x': 0.43, '': 0.41, 'what': 0.05, 'X': 0.03, 'y': 0.01}	277	3.8147e-06	0.43359	0.99724	greedy	out-of-context	0.06	TRUE	TRUE	TRUE	target	{}
Mathematics	math_division2	88 is to 44 as 58 is to	29	x	0.43	0	0	{'x': 0.43, 'what': 0.17, '': 0.16, 'y': 0.15, '\\(': 0.02}	2397	1.00583e-07	0.427734	0.976114	greedy	out-of-context	0.06	TRUE	TRUE	TRUE	target	{}
Mathematics	math_double	38 is to 76 as 28 is to	56	x	0.42	0	0	{'x': 0.42, 'y': 0.19, 'what': 0.19, '': 0.08, 'X': 0.03}	1707	1.11759e-07	0.419922	0.98299	greedy	out-of-context	0.06	TRUE	TRUE	TRUE	target	{}
Mathematics	math_double	38 is to 76 as 72 is to	144	x	0.42	0	0	{'x': 0.42, 'y': 0.25, 'what': 0.14, '': 0.05, '\\(': 0.03}	6401	1.82772e-08	0.423828	0.936215	greedy	out-of-context	0.06	FALSE	TRUE	TRUE	out-of-context	{}
Mathematics	math_double	66 is to 132 as 54 is to	108	x	0.42	0	0	{'x': 0.42, 'what': 0.22, '': 0.13, 'y': 0.13, 'X': 0.03}	1945	8.5216e-08	0.421875	0.980618	greedy	out-of-context	0.06	TRUE	TRUE	TRUE	target	{}
Mathematics	math_division2	66 is to 33 as 28 is to	14	x	0.42	0	0	{'x': 0.42, 'what': 0.22, 'y': 0.18, '': 0.07, 'X': 0.03}	1258	2.21655e-07	0.419922	0.987464	greedy	out-of-context	0.06	TRUE	TRUE	TRUE	target	{}
Mathematics	math_division2	82 is to 41 as 52 is to	26	x	0.42	0	0	{'x': 0.42, 'y': 0.2, '': 0.14, 'what': 0.13, '\\(': 0.03}	1752	1.20141e-07	0.417969	0.982541	greedy	out-of-context	0.06	TRUE	TRUE	TRUE	target	{}
Mathematics	math_double	44 is to 88 as 72 is to	144	x	0.41	0	0	{'x': 0.41, 'y': 0.21, 'what': 0.18, '': 0.08, '\\(': 0.04}	4670	3.21306e-08	0.414062	0.953464	greedy	out-of-context	0.06	TRUE	TRUE	TRUE	target	{}
Mathematics	math_double	92 is to 184 as 18 is to	36	x	0.41	0	0	{'x': 0.41, 'what': 0.3, '': 0.13, 'y': 0.08, 'X': 0.03}	1350	1.4063e-07	0.410156	0.986547	greedy	out-of-context	0.06	TRUE	TRUE	TRUE	target	{}
Mathematics	math_double	44 is to 88 as 54 is to	108	x	0.4	0	0	{'x': 0.4, 'what': 0.19, 'y': 0.19, '': 0.12, 'X': 0.03}	1610	1.35973e-07	0.396484	0.983956	greedy	out-of-context	0.06	TRUE	TRUE	TRUE	target	{}
Mathematics	math_double	16 is to 32 as 20 is to	40	x	0.4	0	0	{'x': 0.4, 'what': 0.26, 'y': 0.18, '': 0.06, 'X': 0.04}	552	3.7998e-07	0.398437	0.994499	greedy	out-of-context	0.06	TRUE	TRUE	TRUE	target	{}
Mathematics	math_double	28 is to 56 as 55 is to	110	x	0.39	0	0	{'x': 0.39, 'what': 0.26, 'y': 0.12, '': 0.1, 'X': 0.05}	2587	8.2422e-08	0.388672	0.974221	greedy	out-of-context	0.06	TRUE	TRUE	TRUE	target	{}
Mathematics	math_double	88 is to 176 as 72 is to	144	x	0.39	0	0	{'x': 0.39, 'what': 0.27, 'y': 0.17, '': 0.09, '\\(': 0.02}	3270	5.09899e-08	0.390625	0.967415	greedy	out-of-context	0.06	TRUE	TRUE	TRUE	target	{}
Mathematics	math_division2	64 is to 32 as 4 is to	2	x	0.39	0	0	{'x': 0.39, '': 0.35, 'what': 0.08, 'X': 0.05, 'the': 0.02}	685	1.61678e-06	0.39453	0.993174	greedy	out-of-context	0.06	TRUE	TRUE	TRUE	target	{}
Mathematics	math_double	46 is to 92 as 72 is to	144	x	0.38	0	0	{'x': 0.38, 'what': 0.25, 'y': 0.23, '': 0.05, '\\(': 0.04}	6610	1.05938e-08	0.384766	0.934132	greedy	out-of-context	0.06	TRUE	TRUE	TRUE	target	{}
Mathematics	math_division2	62 is to 31 as 92 is to	46	x	0.38	0	0	{'x': 0.38, 'y': 0.26, 'what': 0.19, '': 0.07, 'Y': 0.03}	2289	4.61005e-08	0.380859	0.97719	greedy	out-of-context	0.06	TRUE	TRUE	TRUE	target	{}
Mathematics	math_double	30 is to 60 as 60 is to	120	x	0.37	0	0	{'x': 0.37, '': 0.33, 'X': 0.09, 'y': 0.07, 'the': 0.04}	478	1.99676e-06	0.369139	0.995237	greedy	out-of-context	0.06	TRUE	TRUE	TRUE	target	{}
Mathematics	math_double	16 is to 32 as 2 is to	4	x	0.37	0	0	{'x': 0.37, '': 0.32, 'what': 0.2, 'y': 0.03, 'X': 0.03}	163	6.76513e-06	0.369134	0.998376	greedy	out-of-context	0.06	TRUE	TRUE	TRUE	target	{}
Mathematics	math_double	92 is to 184 as 64 is to	128	x	0.37	0	0	{'x': 0.37, 'what': 0.3, 'y': 0.14, '': 0.1, 'X': 0.02}	4458	2.58442e-08	0.373047	0.955576	greedy	out-of-context	0.06	TRUE	TRUE	TRUE	target	{}
Mathematics	math_double	68 is to 136 as 92 is to	184	x	0.37	0	0	{'x': 0.37, 'what': 0.3, 'y': 0.13, '': 0.13, 'X': 0.02}	3143	3.11993e-08	0.373047	0.96868	greedy	out-of-context	0.06	TRUE	TRUE	TRUE	target	{}
Mathematics	math_squares	26 is to 676 as 16 is to	256	x	0.37	0	0	{'x': 0.37, 'what': 0.24, '': 0.18, 'X': 0.04, 'y': 0.03}	1937	2.64496e-07	0.371093	0.980698	greedy	out-of-context	0.06	TRUE	TRUE	TRUE	target	{}
Mathematics	math_division2	92 is to 46 as 52 is to	26	x	0.37	0	0	{'x': 0.37, 'what': 0.18, 'y': 0.17, '': 0.16, '\\(': 0.03}	1719	1.38767e-07	0.371094	0.98287	greedy	out-of-context	0.06	TRUE	TRUE	TRUE	target	{}
Mathematics	math_double	98 is to 196 as 18 is to	36	x	0.36	0	0	{'x': 0.36, 'what': 0.25, '': 0.21, 'y': 0.07, 'X': 0.03}	1291	2.42144e-07	0.355469	0.987135	greedy	out-of-context	0.06	TRUE	TRUE	TRUE	target	{}
Mathematics	math_division2	58 is to 29 as 54 is to	27	x	0.36	0	0	{'x': 0.36, 'y': 0.24, 'what': 0.21, '': 0.08, 'Y': 0.02}	2982	5.61122e-08	0.359375	0.970285	greedy	out-of-context	0.06	TRUE	TRUE	TRUE	target	{}
Mathematics	math_double	50 is to 100 as 100 is to	200	x	0.35	0	0	{'x': 0.35, '': 0.27, 'X': 0.13, 'the': 0.06, 'y': 0.06}	731	9.20147e-07	0.347655	0.992716	greedy	out-of-context	0.06	TRUE	TRUE	TRUE	target	{}
Mathematics	math_double	44 is to 88 as 55 is to	110	x	0.35	0	0	{'x': 0.35, '': 0.22, 'what': 0.18, 'y': 0.15, 'X': 0.03}	1017	3.57628e-07	0.349609	0.989866	greedy	out-of-context	0.06	TRUE	TRUE	TRUE	target	{}
Mathematics	math_double	16 is to 32 as 92 is to	184	x	0.35	0	0	{'x': 0.35, 'what': 0.26, '': 0.15, 'y': 0.1, 'X': 0.06}	4003	3.60887e-08	0.353516	0.96011	greedy	out-of-context	0.06	FALSE	TRUE	TRUE	out-of-context	{}
Mathematics	math_double	92 is to 184 as 72 is to	144	what	0.35	0	0	{'what': 0.35, 'x': 0.35, 'y': 0.16, '': 0.07, '\\(': 0.02}	4245	2.38651e-08	0.353516	0.957699	greedy	out-of-context	0.06	TRUE	TRUE	TRUE	target	{}
Mathematics	math_division2	58 is to 29 as 52 is to	26	x	0.34	0	0	{'x': 0.34, 'y': 0.26, 'what': 0.19, '': 0.09, 'Y': 0.03}	2079	9.77889e-08	0.341797	0.979283	greedy	out-of-context	0.06	TRUE	TRUE	TRUE	target	{}
Mathematics	math_double	78 is to 156 as 34 is to	68	x	0.5	0	0	{'x': 0.5, 'what': 0.22, '': 0.15, 'y': 0.06, 'X': 0.03}	7357	8.73115e-09	0.503906	0.926688	example_value&key	example_value&key	0.06	TRUE	TRUE	TRUE	target	{}
Mathematics	math_division2	60 is to 30 as 18 is to	9	x	0.56	0	0	{'x': 0.56, 'y': 0.17, 'what': 0.11, '': 0.1, 'X': 0.03}	2672	2.44472e-08	0.5625	0.973374	example_key	example_key	0.06	TRUE	TRUE	TRUE	target	{}
Mathematics	math_division2	50 is to 25 as 74 is to	37	x	0.66	0	0	{'x': 0.66, 'what': 0.09, 'y': 0.08, '': 0.08, 'X': 0.04}	6139	8.78936e-09	0.664062	0.938825	original		0.05	FALSE	FALSE	FALSE	out-of-context	{}
Mathematics	math_division2	90 is to 45 as 74 is to	37	x	0.66	0	0	{'x': 0.66, 'y': 0.11, '': 0.08, 'what': 0.07, 'X': 0.03}	5076	1.39698e-08	0.660156	0.949418	original		0.05	FALSE	FALSE	TRUE	out-of-context	{}
Mathematics	math_division2	6 is to 3 as 74 is to	37	x	0.64	0	0	{'x': 0.64, 'y': 0.11, '': 0.08, 'what': 0.08, 'X': 0.04}	7138	1.59489e-08	0.636719	0.92887	original		0.05	FALSE	FALSE	TRUE	out-of-context	{}
Mathematics	math_division2	12 is to 6 as 74 is to	37	x	0.64	0	0	{'x': 0.64, 'y': 0.11, '': 0.11, 'what': 0.07, 'X': 0.02}	6256	1.26311e-08	0.636719	0.937659	original		0.05	FALSE	FALSE	TRUE	out-of-context	{}
Mathematics	math_division2	16 is to 8 as 74 is to	37	x	0.6	0	0	{'x': 0.6, 'y': 0.12, 'what': 0.11, '': 0.1, 'X': 0.02}	4412	2.64263e-08	0.597656	0.956035	original		0.05	FALSE	FALSE	FALSE	out-of-context	{}
Mathematics	math_division2	4 is to 2 as 74 is to	37	x	0.55	0	0	{'x': 0.55, '': 0.14, 'what': 0.1, 'y': 0.08, 'X': 0.05}	4304	6.00703e-08	0.550781	0.957111	original		0.05	FALSE	TRUE	TRUE	out-of-context	{}
Mathematics	math_division2	66 is to 33 as 74 is to	37	x	0.46	0	0	{'x': 0.46, 'what': 0.17, 'y': 0.16, '': 0.09, 'X': 0.04}	3217	6.28643e-08	0.462891	0.967943	original		0.05	FALSE	FALSE	TRUE	out-of-context	{}
Mathematics	math_division2	58 is to 29 as 74 is to	37	x	0.35	0	0	{'x': 0.35, 'y': 0.27, 'what': 0.23, '': 0.06, 'Y': 0.03}	2915	3.79514e-08	0.353516	0.970952	original		0.05	FALSE	FALSE	TRUE	out-of-context	{}
Mathematics	math_division2	16 is to 8 as 86 is to	43	x	0.55	0	0	{'x': 0.55, 'y': 0.15, 'what': 0.11, '': 0.1, 'X': 0.02}	4633	3.00352e-08	0.554687	0.953833	example_key	example_key	0.05	TRUE	TRUE	TRUE	target	{}
Mathematics	math_division2	22 is to 11 as 100 is to	50	x	0.64	0	0	{'x': 0.64, 'y': 0.12, 'what': 0.08, 'X': 0.04, '': 0.03}	4279	3.11993e-08	0.644531	0.95736	example	example	0.05	TRUE	TRUE	TRUE	target	{}
Mathematics	math_double	30 is to 60 as 8 is to	16	x	0.8	0	0	{'x': 0.8, 'y': 0.06, '': 0.06, 'what': 0.04, 'X': 0.01}	386	4.20958e-07	0.796875	0.996154	original		0.04	FALSE	FALSE	FALSE	out-of-context	{}
Mathematics	math_division5	15 is to 3 as 80 is to	16	x	0.8	0	0	{'x': 0.8, 'y': 0.09, '': 0.03, 'what': 0.03, '\\(': 0.02}	1183	7.07805e-08	0.796875	0.988211	original		0.04	FALSE	FALSE	FALSE	out-of-context	{}
Mathematics	math_division2	64 is to 32 as 32 is to	16		0.8	0	0	{'': 0.8, 'x': 0.05, 'the': 0.03, 'what': 0.02, 'X': 0.02}	51	0.000144958	0.804543	0.999492	original		0.04	FALSE	FALSE	FALSE	out-of-context	{}
Mathematics	math_division5	30 is to 6 as 80 is to	16	x	0.79	0	0	{'x': 0.79, 'y': 0.11, '': 0.03, 'what': 0.03, 'X': 0.01}	537	2.01166e-07	0.789062	0.994649	original		0.04	FALSE	FALSE	FALSE	out-of-context	{}
Mathematics	math_double	65 is to 130 as 8 is to	16	x	0.76	0	0	{'x': 0.76, '': 0.08, 'what': 0.07, 'y': 0.05, 'X': 0.01}	333	4.76837e-07	0.757812	0.996682	original		0.04	FALSE	FALSE	FALSE	out-of-context	{}
Mathematics	math_division5	10 is to 2 as 80 is to	16	x	0.76	0	0	{'x': 0.76, 'y': 0.11, 'what': 0.05, '': 0.03, 'X': 0.02}	978	1.11293e-07	0.757812	0.990254	original		0.04	FALSE	FALSE	FALSE	out-of-context	{}
Mathematics	math_squares	30 is to 900 as 14 is to	196	x	0.73	0	0	{'x': 0.73, 'what': 0.08, '': 0.06, 'y': 0.05, 'X': 0.03}	11598	1.97906e-09	0.734375	0.884427	original		0.04	FALSE	FALSE	FALSE	out-of-context	{}
Mathematics	math_squares	20 is to 400 as 14 is to	196	x	0.72	0	0	{'x': 0.72, '': 0.08, 'what': 0.07, 'y': 0.05, 'X': 0.04}	13573	1.75351e-09	0.722656	0.864746	original		0.04	FALSE	FALSE	FALSE	out-of-context	{}
Mathematics	math_division2	100 is to 50 as 74 is to	37	x	0.72	0	0	{'x': 0.72, 'what': 0.08, 'y': 0.07, '': 0.05, 'X': 0.04}	6557	7.39237e-09	0.722656	0.93466	original		0.04	FALSE	FALSE	FALSE	out-of-context	{}
Mathematics	math_division2	30 is to 15 as 74 is to	37	x	0.71	0	0	{'x': 0.71, '': 0.08, 'y': 0.07, 'what': 0.07, 'X': 0.03}	6072	6.95582e-09	0.707031	0.939493	original		0.04	FALSE	FALSE	FALSE	out-of-context	{}
Mathematics	math_double	95 is to 190 as 98 is to	196	x	0.69	0	0	{'x': 0.69, 'y': 0.1, 'what': 0.09, '\\(': 0.04, '': 0.03}	8734	5.61704e-09	0.6875	0.912966	original		0.04	FALSE	FALSE	FALSE	out-of-context	{}
Mathematics	math_double	50 is to 100 as 8 is to	16	x	0.68	0	0	{'x': 0.68, 'what': 0.1, '': 0.08, 'y': 0.07, 'X': 0.02}	509	3.70666e-07	0.679687	0.994928	original		0.04	FALSE	FALSE	FALSE	out-of-context	{}
Mathematics	math_double	6 is to 12 as 84 is to	168	x	0.68	0	0	{'x': 0.68, 'y': 0.14, 'what': 0.05, '': 0.04, 'X': 0.04}	17351	1.6953e-09	0.683594	0.827099	original		0.04	FALSE	FALSE	FALSE	out-of-context	{}
Mathematics	math_double	75 is to 150 as 8 is to	16	x	0.68	0	0	{'x': 0.68, '': 0.14, 'what': 0.08, 'y': 0.03, 'X': 0.03}	788	1.83471e-07	0.679687	0.992148	original		0.04	FALSE	FALSE	FALSE	out-of-context	{}
Mathematics	math_double	70 is to 140 as 84 is to	168	x	0.68	0	0	{'x': 0.68, 'y': 0.11, 'what': 0.09, '': 0.06, 'X': 0.02}	9239	3.0559e-09	0.675781	0.907934	original		0.04	FALSE	FALSE	FALSE	out-of-context	{}
Mathematics	math_division2	40 is to 20 as 74 is to	37	x	0.68	0	0	{'x': 0.68, 'y': 0.1, '': 0.09, 'what': 0.07, 'X': 0.03}	5096	1.14669e-08	0.675781	0.949219	original		0.04	FALSE	FALSE	FALSE	out-of-context	{}
Mathematics	math_division2	28 is to 14 as 74 is to	37	x	0.67	0	0	{'x': 0.67, 'y': 0.09, 'what': 0.09, '': 0.06, 'X': 0.04}	6150	1.39116e-08	0.667969	0.938716	original		0.04	FALSE	FALSE	FALSE	out-of-context	{}
Mathematics	math_squares	15 is to 225 as 14 is to	196	x	0.67	0	0	{'x': 0.67, 'what': 0.13, '': 0.08, 'y': 0.05, 'X': 0.03}	9644	3.50701e-09	0.667969	0.903898	original		0.04	FALSE	FALSE	FALSE	out-of-context	{}
Mathematics	math_double	95 is to 190 as 8 is to	16	x	0.66	0	0	{'x': 0.66, '': 0.14, 'what': 0.07, 'y': 0.06, 'X': 0.02}	663	4.45172e-07	0.65625	0.993393	original		0.04	FALSE	FALSE	FALSE	out-of-context	{}
Mathematics	math_double	95 is to 190 as 65 is to	130	x	0.66	0	0	{'x': 0.66, 'y': 0.08, '': 0.07, 'what': 0.05, 'X': 0.04}	2419	5.70435e-08	0.65625	0.975895	original		0.04	FALSE	FALSE	FALSE	out-of-context	{}
Mathematics	math_division2	24 is to 12 as 74 is to	37	x	0.66	0	0	{'x': 0.66, 'what': 0.11, 'y': 0.08, '': 0.07, 'X': 0.02}	6004	1.27475e-08	0.664062	0.940171	original		0.04	FALSE	FALSE	FALSE	out-of-context	{}
Mathematics	math_division2	20 is to 10 as 74 is to	37	x	0.66	0	0	{'x': 0.66, 'what': 0.1, '': 0.09, 'y': 0.08, 'X': 0.03}	5481	1.38534e-08	0.65625	0.945382	original		0.04	FALSE	FALSE	FALSE	out-of-context	{}
Mathematics	math_division2	10 is to 5 as 28 is to	14	x	0.66	0	0	{'x': 0.66, 'y': 0.16, 'what': 0.07, '': 0.04, 'X': 0.03}	1073	1.59256e-07	0.660156	0.989308	original		0.04	FALSE	FALSE	FALSE	out-of-context	{}
Mathematics	math_double	22 is to 44 as 8 is to	16	x	0.65	0	0	{'x': 0.65, 'what': 0.14, '': 0.08, 'y': 0.06, 'X': 0.02}	134	1.07288e-05	0.652333	0.998665	original		0.04	FALSE	FALSE	FALSE	out-of-context	{}
Mathematics	math_double	100 is to 200 as 98 is to	196	x	0.65	0	0	{'x': 0.65, 'what': 0.12, 'y': 0.07, 'X': 0.06, '': 0.05}	11963	1.94996e-09	0.652344	0.88079	original		0.04	FALSE	FALSE	FALSE	out-of-context	{}
Mathematics	math_division2	50 is to 25 as 32 is to	16	x	0.65	0	0	{'x': 0.65, 'y': 0.1, 'what': 0.09, '': 0.06, 'X': 0.03}	820	2.33762e-07	0.648437	0.991829	original		0.04	FALSE	FALSE	FALSE	out-of-context	{}
Mathematics	math_division2	12 is to 6 as 32 is to	16	x	0.65	0	0	{'x': 0.65, 'y': 0.18, 'what': 0.07, '': 0.05, '\\(': 0.01}	419	4.80562e-07	0.648437	0.995825	original		0.04	FALSE	FALSE	FALSE	out-of-context	{}
Mathematics	math_division2	80 is to 40 as 74 is to	37	x	0.65	0	0	{'x': 0.65, 'y': 0.12, '': 0.09, 'what': 0.06, 'X': 0.03}	5977	1.18162e-08	0.648437	0.94044	original		0.04	FALSE	FALSE	FALSE	out-of-context	{}
Mathematics	math_double	12 is to 24 as 84 is to	168	x	0.64	0	0	{'x': 0.64, 'what': 0.1, 'y': 0.1, '': 0.07, 'X': 0.03}	14371	1.73895e-09	0.636719	0.856794	original		0.04	FALSE	FALSE	FALSE	out-of-context	{}
Mathematics	math_double	80 is to 160 as 65 is to	130	x	0.64	0	0	{'x': 0.64, '': 0.15, 'y': 0.06, 'X': 0.05, 'what': 0.05}	1015	1.08965e-07	0.636719	0.989886	original		0.04	FALSE	FALSE	FALSE	out-of-context	{}
Mathematics	math_double	60 is to 120 as 65 is to	130	x	0.64	0	0	{'x': 0.64, 'y': 0.12, '': 0.07, 'what': 0.05, 'X': 0.05}	1172	9.17353e-08	0.644531	0.988321	original		0.04	FALSE	FALSE	FALSE	out-of-context	{}
Mathematics	math_double	76 is to 152 as 8 is to	16	x	0.64	0	0	{'x': 0.64, 'what': 0.15, '': 0.1, 'y': 0.04, 'X': 0.02}	311	1.08778e-06	0.640624	0.996901	original		0.04	FALSE	FALSE	FALSE	out-of-context	{}
Mathematics	math_double	70 is to 140 as 98 is to	196	x	0.64	0	0	{'x': 0.64, '': 0.11, 'what': 0.11, 'y': 0.07, 'X': 0.03}	7503	4.27826e-09	0.636719	0.925233	original		0.04	FALSE	FALSE	FALSE	out-of-context	{}
Mathematics	math_division2	26 is to 13 as 74 is to	37	x	0.64	0	0	{'x': 0.64, 'y': 0.13, 'what': 0.09, '': 0.04, 'X': 0.04}	5971	1.11759e-08	0.640625	0.940499	original		0.04	FALSE	FALSE	FALSE	out-of-context	{}
Mathematics	math_squares	24 is to 576 as 14 is to	196	x	0.64	0	0	{'x': 0.64, '': 0.13, 'what': 0.11, 'y': 0.04, 'X': 0.03}	11626	4.04543e-09	0.636719	0.884148	original		0.04	FALSE	FALSE	FALSE	out-of-context	{}
Mathematics	math_division2	8 is to 4 as 28 is to	14	x	0.64	0	0	{'x': 0.64, 'y': 0.15, 'what': 0.08, '': 0.04, 'X': 0.03}	1267	1.57394e-07	0.640625	0.987374	original		0.04	FALSE	FALSE	FALSE	out-of-context	{}
Mathematics	math_division2	10 is to 5 as 74 is to	37	x	0.64	0	0	{'x': 0.64, 'y': 0.11, '': 0.08, 'what': 0.07, 'X': 0.03}	6559	1.59489e-08	0.644531	0.93464	original		0.04	FALSE	FALSE	FALSE	out-of-context	{}
Mathematics	math_division2	70 is to 35 as 74 is to	37	x	0.64	0	0	{'x': 0.64, 'y': 0.14, 'what': 0.07, '': 0.07, '\\(': 0.02}	5072	1.68802e-08	0.636719	0.949458	original		0.04	FALSE	FALSE	FALSE	out-of-context	{}
Mathematics	math_double	100 is to 200 as 84 is to	168	x	0.63	0	0	{'x': 0.63, 'what': 0.11, '': 0.07, 'X': 0.07, 'y': 0.06}	14122	1.6953e-09	0.628906	0.859275	original		0.04	FALSE	FALSE	FALSE	out-of-context	{}
Mathematics	math_double	60 is to 120 as 84 is to	168	x	0.63	0	0	{'x': 0.63, 'y': 0.15, 'what': 0.09, '': 0.05, 'X': 0.03}	11686	1.76806e-09	0.632812	0.88355	original		0.04	FALSE	FALSE	FALSE	out-of-context	{}
Mathematics	math_double	74 is to 148 as 8 is to	16	x	0.63	0	0	{'x': 0.63, 'what': 0.14, '': 0.12, 'y': 0.04, 'X': 0.03}	273	1.31875e-06	0.628905	0.99728	original		0.04	FALSE	FALSE	FALSE	out-of-context	{}
Mathematics	math_division2	40 is to 20 as 32 is to	16	x	0.63	0	0	{'x': 0.63, 'y': 0.15, 'what': 0.09, '': 0.05, 'X': 0.03}	817	2.16067e-07	0.628906	0.991859	original		0.04	FALSE	FALSE	FALSE	out-of-context	{}
Mathematics	math_division2	14 is to 7 as 74 is to	37	x	0.63	0	0	{'x': 0.63, 'y': 0.11, 'what': 0.08, '': 0.06, 'X': 0.03}	8444	1.25729e-08	0.632812	0.915856	original		0.04	FALSE	FALSE	FALSE	out-of-context	{}
Mathematics	math_division2	8 is to 4 as 74 is to	37	x	0.63	0	0	{'x': 0.63, 'y': 0.1, '': 0.09, 'what': 0.08, 'X': 0.04}	6341	1.9907e-08	0.628906	0.936812	original		0.04	FALSE	FALSE	FALSE	out-of-context	{}
Mathematics	math_double	30 is to 60 as 84 is to	168	x	0.62	0	0	{'x': 0.62, 'y': 0.13, '': 0.08, 'what': 0.07, 'X': 0.04}	12514	2.53203e-09	0.625	0.875299	original		0.04	FALSE	FALSE	FALSE	out-of-context	{}
Mathematics	math_double	65 is to 130 as 98 is to	196	x	0.62	0	0	{'x': 0.62, 'y': 0.13, 'what': 0.11, '': 0.06, '\\(': 0.03}	9863	2.80852e-09	0.617187	0.901716	original		0.04	FALSE	FALSE	FALSE	out-of-context	{}
Mathematics	math_division2	34 is to 17 as 74 is to	37	x	0.62	0	0	{'x': 0.62, 'y': 0.12, 'what': 0.09, '': 0.08, 'X': 0.03}	2869	4.6799e-08	0.617187	0.971411	original		0.04	FALSE	FALSE	FALSE	out-of-context	{}
Mathematics	math_division2	36 is to 18 as 74 is to	37	x	0.62	0	0	{'x': 0.62, '': 0.11, 'y': 0.1, 'what': 0.09, 'X': 0.03}	4110	1.53668e-08	0.625	0.959044	original		0.04	FALSE	FALSE	FALSE	out-of-context	{}
Mathematics	math_squares	6 is to 36 as 14 is to	196	x	0.62	0	0	{'x': 0.62, 'what': 0.12, 'y': 0.12, '': 0.06, 'X': 0.03}	16983	2.40107e-09	0.617187	0.830766	original		0.04	FALSE	FALSE	FALSE	out-of-context	{}
Mathematics	math_squares	12 is to 144 as 14 is to	196	x	0.62	0	0	{'x': 0.62, 'what': 0.14, 'y': 0.12, '': 0.05, '\\(': 0.02}	13586	1.75351e-09	0.617187	0.864617	original		0.04	FALSE	FALSE	FALSE	out-of-context	{}
Mathematics	math_double	35 is to 70 as 98 is to	196	x	0.61	0	0	{'x': 0.61, 'y': 0.12, '': 0.09, 'what': 0.09, 'X': 0.03}	10844	3.14321e-09	0.609375	0.89194	original		0.04	FALSE	FALSE	FALSE	out-of-context	{}
Mathematics	math_double	30 is to 60 as 98 is to	196	x	0.61	0	0	{'x': 0.61, '': 0.12, 'y': 0.1, 'what': 0.08, 'X': 0.05}	10943	3.30328e-09	0.613281	0.890954	original		0.04	FALSE	FALSE	FALSE	out-of-context	{}
Mathematics	math_double	50 is to 100 as 98 is to	196	x	0.61	0	0	{'x': 0.61, 'what': 0.13, 'y': 0.1, '': 0.06, 'X': 0.05}	18061	1.26602e-09	0.605469	0.820024	original		0.04	FALSE	FALSE	FALSE	out-of-context	{}
Mathematics	math_double	20 is to 40 as 84 is to	168	x	0.61	0	0	{'x': 0.61, '': 0.11, 'y': 0.11, 'what': 0.08, 'X': 0.04}	12799	2.18279e-09	0.605469	0.872459	original		0.04	FALSE	FALSE	FALSE	out-of-context	{}
Mathematics	math_double	80 is to 160 as 84 is to	168	x	0.61	0	0	{'x': 0.61, 'y': 0.11, 'what': 0.11, '': 0.1, 'X': 0.03}	7244	6.46105e-09	0.605469	0.927814	original		0.04	FALSE	FALSE	FALSE	out-of-context	{}
Mathematics	math_double	65 is to 130 as 84 is to	168	x	0.61	0	0	{'x': 0.61, 'y': 0.18, 'what': 0.1, '': 0.03, '\\(': 0.03}	12516	1.80444e-09	0.613281	0.875279	original		0.04	FALSE	FALSE	FALSE	out-of-context	{}
Mathematics	math_division2	48 is to 24 as 74 is to	37	x	0.61	0	0	{'x': 0.61, 'what': 0.12, 'y': 0.1, '': 0.08, 'X': 0.03}	4049	2.49129e-08	0.613281	0.959652	original		0.04	FALSE	FALSE	FALSE	out-of-context	{}
Mathematics	math_double	4 is to 8 as 84 is to	168	x	0.61	0	0	{'x': 0.61, 'y': 0.12, 'what': 0.09, '': 0.07, 'X': 0.04}	13069	5.00586e-09	0.613281	0.869768	original		0.04	FALSE	FALSE	FALSE	out-of-context	{}
Mathematics	math_double	90 is to 180 as 98 is to	196	x	0.6	0	0	{'x': 0.6, 'what': 0.14, 'y': 0.12, '': 0.06, 'X': 0.03}	9397	4.27826e-09	0.601562	0.90636	original		0.04	FALSE	FALSE	FALSE	out-of-context	{}
Mathematics	math_double	55 is to 110 as 8 is to	16	x	0.6	0	0	{'x': 0.6, 'what': 0.14, '': 0.13, 'y': 0.08, 'X': 0.01}	225	1.52737e-06	0.597655	0.997758	original		0.04	FALSE	FALSE	FALSE	out-of-context	{}
Mathematics	math_double	18 is to 36 as 84 is to	168	x	0.59	0	0	{'x': 0.59, 'y': 0.16, 'what': 0.11, '': 0.06, 'X': 0.03}	13057	2.45927e-09	0.59375	0.869888	original		0.04	FALSE	FALSE	FALSE	out-of-context	{}
Mathematics	math_double	90 is to 180 as 84 is to	168	x	0.59	0	0	{'x': 0.59, 'what': 0.14, 'y': 0.12, '': 0.06, 'X': 0.02}	10605	3.7835e-09	0.589844	0.894322	original		0.04	FALSE	FALSE	FALSE	out-of-context	{}
Mathematics	math_double	95 is to 190 as 84 is to	168	x	0.59	0	0	{'x': 0.59, 'y': 0.14, 'what': 0.1, '': 0.06, '\\(': 0.05}	12523	4.27826e-09	0.59375	0.875209	original		0.04	FALSE	FALSE	FALSE	out-of-context	{}
Mathematics	math_squares	5 is to 25 as 14 is to	196	x	0.59	0	0	{'x': 0.59, 'what': 0.14, 'y': 0.09, '': 0.07, 'X': 0.05}	17537	1.60071e-09	0.59375	0.825245	original		0.04	FALSE	FALSE	FALSE	out-of-context	{}
Mathematics	math_squares	6 is to 36 as 4 is to	16	x	0.59	0	0	{'x': 0.59, 'what': 0.17, '': 0.1, 'y': 0.07, 'X': 0.02}	328	1.18464e-06	0.593749	0.996732	original		0.04	FALSE	FALSE	FALSE	out-of-context	{}
Mathematics	math_division2	22 is to 11 as 74 is to	37	x	0.59	0	0	{'x': 0.59, 'y': 0.13, 'what': 0.1, '': 0.07, '\\(': 0.02}	5371	2.37487e-08	0.59375	0.946478	original		0.04	FALSE	FALSE	FALSE	out-of-context	{}
Mathematics	math_division2	96 is to 48 as 74 is to	37	x	0.59	0	0	{'x': 0.59, 'what': 0.12, 'y': 0.11, '': 0.09, 'X': 0.02}	4296	2.43308e-08	0.589844	0.957191	original		0.04	FALSE	FALSE	FALSE	out-of-context	{}
Mathematics	math_double	2 is to 4 as 84 is to	168	x	0.59	0	0	{'x': 0.59, 'y': 0.11, '': 0.09, 'what': 0.07, 'X': 0.07}	14023	4.80213e-09	0.589844	0.860262	original		0.04	FALSE	FALSE	FALSE	out-of-context	{}
Mathematics	math_division2	86 is to 43 as 74 is to	37	x	0.59	0	0	{'x': 0.59, 'y': 0.2, 'what': 0.06, '': 0.05, 'X': 0.03}	4636	1.57161e-08	0.585937	0.953803	original		0.04	FALSE	FALSE	TRUE	out-of-context	{}
Mathematics	math_division2	86 is to 43 as 32 is to	16	x	0.59	0	0	{'x': 0.59, 'y': 0.22, 'what': 0.05, '': 0.03, '\\(': 0.03}	382	6.29574e-07	0.589843	0.996193	original		0.04	FALSE	FALSE	FALSE	out-of-context	{}
Mathematics	math_double	52 is to 104 as 65 is to	130	x	0.58	0	0	{'x': 0.58, 'what': 0.12, '': 0.09, 'y': 0.09, 'X': 0.05}	2123	8.61473e-08	0.578125	0.978844	original		0.04	FALSE	FALSE	FALSE	out-of-context	{}
Mathematics	math_double	46 is to 92 as 8 is to	16	x	0.58	0	0	{'x': 0.58, 'what': 0.2, '': 0.1, 'y': 0.07, '\\(': 0.01}	173	3.41237e-06	0.582028	0.998276	original		0.04	FALSE	FALSE	FALSE	out-of-context	{}
Mathematics	math_squares	10 is to 100 as 4 is to	16	x	0.58	0	0	{'x': 0.58, 'what': 0.14, 'y': 0.1, '': 0.06, 'X': 0.04}	723	3.59491e-07	0.582031	0.992795	original		0.04	FALSE	FALSE	FALSE	out-of-context	{}
Mathematics	math_division2	60 is to 30 as 74 is to	37	x	0.58	0	0	{'x': 0.58, 'y': 0.15, '': 0.09, 'what': 0.08, 'X': 0.04}	3882	1.47847e-08	0.582031	0.961316	original		0.04	FALSE	FALSE	FALSE	out-of-context	{}
Mathematics	math_double	5 is to 10 as 84 is to	168	x	0.57	0	0	{'x': 0.57, 'y': 0.13, 'what': 0.12, '': 0.08, 'X': 0.04}	19268	1.59343e-09	0.574219	0.807996	original		0.04	FALSE	FALSE	FALSE	out-of-context	{}
Mathematics	math_double	24 is to 48 as 84 is to	168	x	0.57	0	0	{'x': 0.57, 'what': 0.12, 'y': 0.12, '': 0.08, 'X': 0.04}	11445	4.36557e-09	0.574219	0.885951	original		0.04	FALSE	FALSE	FALSE	out-of-context	{}
Mathematics	math_squares	2 is to 4 as 14 is to	196	x	0.57	0	0	{'x': 0.57, 'y': 0.12, 'what': 0.1, '': 0.08, 'X': 0.07}	14283	3.75439e-09	0.570312	0.857671	original		0.04	FALSE	FALSE	FALSE	out-of-context	{}
Mathematics	math_division2	18 is to 9 as 74 is to	37	x	0.57	0	0	{'x': 0.57, 'y': 0.16, 'what': 0.11, '': 0.08, 'X': 0.02}	4624	2.11876e-08	0.570312	0.953922	original		0.04	FALSE	FALSE	FALSE	out-of-context	{}
Mathematics	math_division2	72 is to 36 as 74 is to	37	x	0.57	0	0	{'x': 0.57, 'y': 0.14, 'what': 0.11, '': 0.08, '\\(': 0.03}	4020	3.37604e-08	0.566406	0.959941	original		0.04	FALSE	FALSE	FALSE	out-of-context	{}
Mathematics	math_squares	8 is to 64 as 14 is to	196	x	0.56	0	0	{'x': 0.56, 'what': 0.16, 'y': 0.11, '': 0.06, 'X': 0.05}	14343	3.3906e-09	0.558594	0.857073	original		0.04	FALSE	FALSE	FALSE	out-of-context	{}
Mathematics	math_double	22 is to 44 as 98 is to	196	x	0.55	0	0	{'x': 0.55, 'what': 0.13, '': 0.1, 'y': 0.09, 'X': 0.06}	9530	8.78936e-09	0.550781	0.905034	original		0.04	FALSE	FALSE	FALSE	out-of-context	{}
Mathematics	math_division2	32 is to 16 as 74 is to	37	x	0.55	0	0	{'x': 0.55, 'what': 0.16, '': 0.12, 'y': 0.06, 'X': 0.05}	3200	5.40167e-08	0.554687	0.968112	original		0.04	FALSE	FALSE	FALSE	out-of-context	{}
Mathematics	math_division2	38 is to 19 as 74 is to	37	x	0.55	0	0	{'x': 0.55, 'y': 0.16, 'what': 0.12, '': 0.06, 'X': 0.04}	2997	3.44589e-08	0.554687	0.970135	original		0.04	FALSE	FALSE	FALSE	out-of-context	{}
Mathematics	math_squares	10 is to 100 as 14 is to	196	x	0.55	0	0	{'x': 0.55, 'what': 0.15, 'y': 0.11, '': 0.06, 'X': 0.06}	12529	3.15777e-09	0.550781	0.875149	original		0.04	FALSE	FALSE	FALSE	out-of-context	{}
Mathematics	math_squares	16 is to 256 as 14 is to	196	x	0.55	0	0	{'x': 0.55, 'what': 0.2, 'y': 0.08, '': 0.07, 'X': 0.04}	12577	4.5693e-09	0.550781	0.874671	original		0.04	FALSE	FALSE	FALSE	out-of-context	{}
Mathematics	math_double	2 is to 4 as 8 is to	16	x	0.55	0	0	{'x': 0.55, 'y': 0.15, 'what': 0.14, '': 0.06, 'X': 0.05}	278	2.01166e-06	0.550779	0.99723	original		0.04	FALSE	FALSE	FALSE	out-of-context	{}
Mathematics	math_double	40 is to 80 as 84 is to	168	x	0.54	0	0	{'x': 0.54, 'y': 0.16, 'what': 0.1, '': 0.1, 'X': 0.03}	13167	2.83762e-09	0.542969	0.868792	original		0.04	FALSE	FALSE	FALSE	out-of-context	{}
Mathematics	math_double	5 is to 10 as 98 is to	196	x	0.54	0	0	{'x': 0.54, 'what': 0.13, 'y': 0.12, '': 0.11, 'X': 0.04}	11352	4.62751e-09	0.535156	0.886878	original		0.04	FALSE	FALSE	FALSE	out-of-context	{}
Mathematics	math_double	25 is to 50 as 84 is to	168	x	0.54	0	0	{'x': 0.54, 'y': 0.13, 'what': 0.12, '': 0.1, 'X': 0.04}	13264	2.38651e-09	0.542969	0.867825	original		0.04	FALSE	FALSE	FALSE	out-of-context	{}
Mathematics	math_double	24 is to 48 as 98 is to	196	x	0.54	0	0	{'x': 0.54, 'what': 0.13, '': 0.12, 'y': 0.09, 'X': 0.05}	11299	4.97676e-09	0.535156	0.887406	original		0.04	FALSE	FALSE	FALSE	out-of-context	{}
Mathematics	math_double	22 is to 44 as 84 is to	168	x	0.54	0	0	{'x': 0.54, 'what': 0.13, 'y': 0.12, '': 0.08, 'X': 0.05}	13479	5.47152e-09	0.539062	0.865683	original		0.04	FALSE	FALSE	FALSE	out-of-context	{}
Mathematics	math_double	64 is to 128 as 84 is to	168	x	0.54	0	0	{'x': 0.54, 'what': 0.15, 'y': 0.14, '': 0.05, 'X': 0.03}	8244	1.13505e-08	0.542969	0.917849	original		0.04	FALSE	FALSE	FALSE	out-of-context	{}
Mathematics	math_division2	52 is to 26 as 74 is to	37	x	0.54	0	0	{'x': 0.54, 'what': 0.15, 'y': 0.15, '': 0.06, 'X': 0.03}	2687	4.14439e-08	0.535156	0.973224	original		0.04	FALSE	FALSE	FALSE	out-of-context	{}
Mathematics	math_division2	56 is to 28 as 74 is to	37	x	0.54	0	0	{'x': 0.54, 'y': 0.15, 'what': 0.14, '': 0.09, 'X': 0.02}	2847	2.82889e-08	0.542969	0.97163	original		0.04	FALSE	FALSE	FALSE	out-of-context	{}
Mathematics	math_division2	42 is to 21 as 74 is to	37	x	0.54	0	0	{'x': 0.54, 'y': 0.16, 'what': 0.12, '': 0.08, '\\(': 0.03}	4584	1.57161e-08	0.535156	0.954321	original		0.04	FALSE	FALSE	FALSE	out-of-context	{}
Mathematics	math_squares	25 is to 625 as 14 is to	196	x	0.54	0	0	{'x': 0.54, 'what': 0.16, '': 0.14, 'y': 0.05, 'X': 0.04}	11575	4.39468e-09	0.539062	0.884656	original		0.04	FALSE	FALSE	FALSE	out-of-context	{}
Mathematics	math_double	4 is to 8 as 98 is to	196	x	0.54	0	0	{'x': 0.54, 'y': 0.11, 'what': 0.11, '': 0.11, 'X': 0.05}	8148	1.18744e-08	0.535156	0.918806	original		0.04	FALSE	FALSE	FALSE	out-of-context	{}
Mathematics	math_double	36 is to 72 as 98 is to	196	x	0.53	0	0	{'x': 0.53, '': 0.13, 'y': 0.13, 'what': 0.11, 'X': 0.03}	11320	4.27826e-09	0.53125	0.887197	original		0.04	FALSE	FALSE	FALSE	out-of-context	{}
Mathematics	math_double	52 is to 104 as 84 is to	168	x	0.53	0	0	{'x': 0.53, 'what': 0.22, 'y': 0.1, '': 0.05, 'X': 0.04}	7506	9.0804e-09	0.527344	0.925203	original		0.04	FALSE	FALSE	FALSE	out-of-context	{}
Mathematics	math_double	25 is to 50 as 98 is to	196	x	0.53	0	0	{'x': 0.53, '': 0.13, 'what': 0.12, 'y': 0.11, 'X': 0.06}	8936	4.5402e-09	0.527344	0.910953	original		0.04	FALSE	FALSE	FALSE	out-of-context	{}
Mathematics	math_double	26 is to 52 as 84 is to	168	x	0.53	0	0	{'x': 0.53, 'what': 0.16, 'y': 0.14, 'X': 0.05, '': 0.04}	13295	4.86034e-09	0.53125	0.867516	original		0.04	FALSE	FALSE	FALSE	out-of-context	{}
Mathematics	math_double	85 is to 170 as 98 is to	196	x	0.53	0	0	{'x': 0.53, 'what': 0.17, 'y': 0.13, '': 0.1, '\\(': 0.02}	8290	5.87897e-09	0.527344	0.917391	original		0.04	FALSE	FALSE	FALSE	out-of-context	{}
Mathematics	math_double	86 is to 172 as 98 is to	196	x	0.53	0	0	{'x': 0.53, 'what': 0.16, 'y': 0.14, '': 0.09, 'X': 0.02}	4230	3.0268e-08	0.53125	0.957848	original		0.04	FALSE	FALSE	FALSE	out-of-context	{}
Mathematics	math_double	56 is to 112 as 84 is to	168	x	0.53	0	0	{'x': 0.53, 'what': 0.19, 'y': 0.15, '': 0.06, '\\(': 0.02}	8562	5.00586e-09	0.527344	0.91468	original		0.04	FALSE	FALSE	FALSE	out-of-context	{}
Mathematics	math_squares	18 is to 324 as 14 is to	196	x	0.53	0	0	{'x': 0.53, 'what': 0.23, 'y': 0.08, '': 0.07, 'X': 0.02}	13925	3.89991e-09	0.53125	0.861238	original		0.04	FALSE	FALSE	FALSE	out-of-context	{}
Mathematics	math_squares	22 is to 484 as 14 is to	196	x	0.52	0	0	{'x': 0.52, 'what': 0.21, '': 0.11, 'y': 0.06, 'X': 0.04}	9116	1.12341e-08	0.523437	0.90916	original		0.04	FALSE	FALSE	FALSE	out-of-context	{}
Mathematics	math_double	15 is to 30 as 98 is to	196	x	0.51	0	0	{'x': 0.51, '': 0.15, 'what': 0.13, 'y': 0.11, 'X': 0.05}	9915	3.37604e-09	0.507812	0.901198	original		0.04	FALSE	FALSE	FALSE	out-of-context	{}
Mathematics	math_double	10 is to 20 as 84 is to	168	x	0.51	0	0	{'x': 0.51, 'what': 0.14, '': 0.12, 'y': 0.11, 'X': 0.05}	14228	2.60479e-09	0.511719	0.858219	original		0.04	FALSE	FALSE	FALSE	out-of-context	{}
Mathematics	math_division2	88 is to 44 as 74 is to	37	x	0.51	0	0	{'x': 0.51, 'what': 0.16, 'y': 0.15, '': 0.09, '\\(': 0.03}	3170	5.23869e-08	0.511719	0.968411	original		0.04	FALSE	FALSE	FALSE	out-of-context	{}
Mathematics	math_double	32 is to 64 as 84 is to	168	x	0.5	0	0	{'x': 0.5, 'what': 0.19, 'y': 0.12, '': 0.06, 'X': 0.05}	12257	6.49015e-09	0.503906	0.87786	original		0.04	FALSE	FALSE	FALSE	out-of-context	{}
Mathematics	math_double	34 is to 68 as 98 is to	196	x	0.5	0	0	{'x': 0.5, 'y': 0.24, 'what': 0.09, '\\(': 0.04, '': 0.04}	11004	8.84756e-09	0.503906	0.890346	original		0.04	FALSE	FALSE	FALSE	out-of-context	{}
Mathematics	math_double	45 is to 90 as 84 is to	168	x	0.5	0	0	{'x': 0.5, 'what': 0.19, 'y': 0.13, '': 0.07, '\\(': 0.04}	14630	1.89175e-09	0.503906	0.854213	original		0.04	FALSE	FALSE	FALSE	out-of-context	{}
Mathematics	math_double	18 is to 36 as 98 is to	196	x	0.5	0	0	{'x': 0.5, 'what': 0.16, '': 0.12, 'y': 0.12, 'X': 0.04}	10919	5.20959e-09	0.503906	0.891193	original		0.04	FALSE	FALSE	FALSE	out-of-context	{}
Mathematics	math_double	55 is to 110 as 65 is to	130	x	0.5	0	0	{'x': 0.5, 'y': 0.18, 'what': 0.15, '': 0.08, '\\(': 0.03}	1471	1.0198e-07	0.503906	0.985342	original		0.04	FALSE	FALSE	FALSE	out-of-context	{}
Mathematics	math_division2	54 is to 27 as 74 is to	37	x	0.5	0	0	{'x': 0.5, 'y': 0.16, 'what': 0.13, '': 0.11, 'X': 0.04}	2702	4.42378e-08	0.496094	0.973075	original		0.04	FALSE	FALSE	FALSE	out-of-context	{}
Mathematics	math_division2	46 is to 23 as 74 is to	37	x	0.5	0	0	{'x': 0.5, 'y': 0.21, 'what': 0.12, '': 0.07, 'X': 0.03}	3339	2.50293e-08	0.498047	0.966727	original		0.04	FALSE	FALSE	FALSE	out-of-context	{}
Mathematics	math_squares	4 is to 16 as 14 is to	196	x	0.5	0	0	{'x': 0.5, 'what': 0.18, 'y': 0.13, '': 0.07, 'X': 0.05}	13854	4.45289e-09	0.498047	0.861946	original		0.04	FALSE	FALSE	FALSE	out-of-context	{}
Mathematics	math_division2	98 is to 49 as 74 is to	37	x	0.5	0	0	{'x': 0.5, 'what': 0.17, 'y': 0.15, '': 0.07, 'X': 0.03}	3858	3.11993e-08	0.503906	0.961555	original		0.04	FALSE	FALSE	FALSE	out-of-context	{}
Mathematics	math_double	2 is to 4 as 98 is to	196	x	0.5	0	0	{'x': 0.5, '': 0.15, 'what': 0.11, 'y': 0.09, 'X': 0.07}	7990	1.44355e-08	0.498047	0.92038	original		0.04	FALSE	FALSE	FALSE	out-of-context	{}
Mathematics	math_double	42 is to 84 as 84 is to	168		0.49	0	0	{'': 0.49, 'x': 0.21, 'X': 0.08, 'what': 0.08, 'the': 0.03}	2141	3.31551e-07	0.488281	0.978665	original		0.04	FALSE	FALSE	FALSE	out-of-context	{}
Mathematics	math_double	28 is to 56 as 84 is to	168	x	0.49	0	0	{'x': 0.49, 'what': 0.2, 'y': 0.17, '': 0.04, 'X': 0.04}	10503	4.48199e-09	0.492187	0.895338	original		0.04	FALSE	FALSE	FALSE	out-of-context	{}
Mathematics	math_double	64 is to 128 as 98 is to	196	x	0.49	0	0	{'x': 0.49, 'what': 0.2, 'y': 0.11, '': 0.06, 'X': 0.05}	9455	7.85803e-09	0.492187	0.905782	original		0.04	FALSE	FALSE	FALSE	out-of-context	{}
Mathematics	math_division2	2 is to 1 as 74 is to	37	x	0.49	0	0	{'x': 0.49, '': 0.28, 'X': 0.06, 'y': 0.05, 'what': 0.04}	1873	3.46452e-07	0.486328	0.981336	original		0.04	FALSE	FALSE	FALSE	out-of-context	{}
Mathematics	math_division2	84 is to 42 as 74 is to	37	x	0.49	0	0	{'x': 0.49, 'y': 0.2, 'what': 0.15, '': 0.06, '\\(': 0.03}	4950	2.18861e-08	0.490234	0.950674	original		0.04	FALSE	FALSE	FALSE	out-of-context	{}
Mathematics	math_division2	82 is to 41 as 94 is to	47	x	0.49	0	0	{'x': 0.49, 'y': 0.25, 'what': 0.1, '': 0.06, '\\(': 0.03}	2129	5.68107e-08	0.494141	0.978785	original		0.04	FALSE	FALSE	FALSE	out-of-context	{}
Mathematics	math_double	78 is to 156 as 84 is to	168	x	0.48	0	0	{'x': 0.48, 'what': 0.2, 'y': 0.2, '': 0.06, 'X': 0.02}	8218	6.02449e-09	0.478516	0.918108	original		0.04	FALSE	FALSE	FALSE	out-of-context	{}
Mathematics	math_double	55 is to 110 as 98 is to	196	x	0.48	0	0	{'x': 0.48, 'y': 0.18, 'what': 0.17, '': 0.08, '\\(': 0.03}	9944	4.88944e-09	0.484375	0.900909	original		0.04	FALSE	FALSE	FALSE	out-of-context	{}
Mathematics	math_division2	78 is to 39 as 74 is to	37	x	0.48	0	0	{'x': 0.48, 'y': 0.17, 'what': 0.15, '': 0.1, 'X': 0.03}	3240	4.44707e-08	0.480469	0.967714	original		0.04	FALSE	FALSE	FALSE	out-of-context	{}
Mathematics	math_double	16 is to 32 as 84 is to	168	x	0.47	0	0	{'x': 0.47, 'what': 0.21, 'y': 0.11, '': 0.1, 'X': 0.05}	9872	7.567e-09	0.472656	0.901626	original		0.04	FALSE	FALSE	FALSE	out-of-context	{}
Mathematics	math_division2	56 is to 28 as 28 is to	14		0.47	0	0	{'': 0.47, 'x': 0.25, 'what': 0.11, 'X': 0.05, 'y': 0.02}	548	1.41561e-06	0.470702	0.994539	original		0.04	FALSE	FALSE	FALSE	out-of-context	{}
Mathematics	math_division2	94 is to 47 as 74 is to	37	x	0.47	0	0	{'x': 0.47, 'y': 0.17, 'what': 0.15, '': 0.09, 'X': 0.03}	3678	3.23635e-08	0.474609	0.963349	original		0.04	FALSE	FALSE	FALSE	out-of-context	{}
Mathematics	math_division2	82 is to 41 as 74 is to	37	x	0.47	0	0	{'x': 0.47, 'y': 0.21, 'what': 0.15, '': 0.08, '\\(': 0.03}	3441	3.53903e-08	0.466797	0.965711	original		0.04	FALSE	FALSE	FALSE	out-of-context	{}
Mathematics	math_double	48 is to 96 as 84 is to	168	x	0.46	0	0	{'x': 0.46, 'what': 0.25, 'y': 0.12, '': 0.07, 'X': 0.03}	12074	3.8126e-09	0.460937	0.879684	original		0.04	FALSE	FALSE	FALSE	out-of-context	{}
Mathematics	math_double	52 is to 104 as 98 is to	196	x	0.46	0	0	{'x': 0.46, 'what': 0.26, 'y': 0.09, '': 0.08, 'X': 0.05}	7269	1.22818e-08	0.462891	0.927565	original		0.04	FALSE	FALSE	FALSE	out-of-context	{}
Mathematics	math_double	8 is to 16 as 98 is to	196	x	0.46	0	0	{'x': 0.46, 'what': 0.17, '': 0.13, 'y': 0.09, 'X': 0.06}	7139	2.10712e-08	0.455078	0.92886	original		0.04	FALSE	FALSE	FALSE	out-of-context	{}
Mathematics	math_double	74 is to 148 as 84 is to	168	x	0.46	0	0	{'x': 0.46, 'what': 0.21, 'y': 0.2, '': 0.05, 'Y': 0.02}	10923	3.89991e-09	0.455078	0.891153	original		0.04	FALSE	FALSE	FALSE	out-of-context	{}
Mathematics	math_squares	28 is to 784 as 14 is to	196	x	0.46	0	0	{'x': 0.46, 'what': 0.22, '': 0.11, 'X': 0.07, 'y': 0.03}	3414	6.65896e-08	0.460937	0.96598	original		0.04	FALSE	FALSE	FALSE	out-of-context	{}
Mathematics	math_squares	22 is to 484 as 4 is to	16	x	0.46	0	0	{'x': 0.46, '': 0.22, 'what': 0.17, 'X': 0.05, 'y': 0.04}	436	1.54972e-06	0.45703	0.995655	original		0.04	FALSE	FALSE	FALSE	out-of-context	{}
Mathematics	math_division2	92 is to 46 as 74 is to	37	x	0.46	0	0	{'x': 0.46, 'what': 0.21, 'y': 0.17, '': 0.08, '\\(': 0.02}	2837	3.95812e-08	0.455078	0.97173	original		0.04	FALSE	FALSE	FALSE	out-of-context	{}
Mathematics	math_division2	64 is to 32 as 74 is to	37	x	0.46	0	0	{'x': 0.46, 'what': 0.15, 'y': 0.1, '': 0.1, 'X': 0.07}	1446	3.05474e-07	0.46289	0.985591	original		0.04	FALSE	FALSE	TRUE	out-of-context	{}
Mathematics	math_division2	84 is to 42 as 32 is to	16	x	0.46	0	0	{'x': 0.46, 'y': 0.25, 'what': 0.13, '': 0.04, '\\(': 0.03}	577	4.73112e-07	0.464843	0.99425	original		0.04	FALSE	FALSE	FALSE	out-of-context	{}
Mathematics	math_double	85 is to 170 as 84 is to	168	x	0.45	0	0	{'x': 0.45, 'what': 0.22, 'y': 0.13, '': 0.11, 'X': 0.02}	7684	1.07684e-08	0.453125	0.92343	original		0.04	FALSE	FALSE	FALSE	out-of-context	{}
Mathematics	math_double	76 is to 152 as 98 is to	196	x	0.45	0	0	{'x': 0.45, 'what': 0.26, 'y': 0.14, '': 0.08, 'X': 0.02}	6354	9.0804e-09	0.445312	0.936683	original		0.04	FALSE	FALSE	FALSE	out-of-context	{}
Mathematics	math_double	38 is to 76 as 98 is to	196	x	0.44	0	0	{'x': 0.44, 'what': 0.2, 'y': 0.16, '': 0.08, 'X': 0.04}	8030	1.01863e-08	0.435547	0.919982	original		0.04	FALSE	FALSE	FALSE	out-of-context	{}
Mathematics	math_double	68 is to 136 as 84 is to	168	x	0.44	0	0	{'x': 0.44, 'what': 0.25, 'y': 0.16, '': 0.08, 'X': 0.02}	8027	7.04313e-09	0.443359	0.920012	original		0.04	FALSE	FALSE	FALSE	out-of-context	{}
Mathematics	math_division2	76 is to 38 as 74 is to	37	x	0.44	0	0	{'x': 0.44, 'y': 0.25, 'what': 0.15, '': 0.07, '\\(': 0.02}	3500	3.60887e-08	0.441406	0.965123	original		0.04	FALSE	FALSE	FALSE	out-of-context	{}
Mathematics	math_double	66 is to 132 as 98 is to	196	x	0.43	0	0	{'x': 0.43, 'what': 0.22, '': 0.13, 'y': 0.13, 'X': 0.03}	8781	6.31553e-09	0.433594	0.912498	original		0.04	FALSE	FALSE	FALSE	out-of-context	{}
Mathematics	math_division2	92 is to 46 as 32 is to	16	x	0.43	0	0	{'x': 0.43, 'y': 0.21, 'what': 0.16, '': 0.08, '\\(': 0.03}	373	1.13249e-06	0.433593	0.996283	original		0.04	FALSE	FALSE	FALSE	out-of-context	{}
Mathematics	math_double	84 is to 168 as 98 is to	196	x	0.42	0	0	{'x': 0.42, 'what': 0.19, '': 0.15, 'y': 0.13, 'X': 0.04}	6163	1.46101e-08	0.423828	0.938586	original		0.04	FALSE	FALSE	FALSE	out-of-context	{}
Mathematics	math_double	62 is to 124 as 84 is to	168	x	0.42	0	0	{'x': 0.42, 'y': 0.23, 'what': 0.21, '': 0.06, '\\(': 0.02}	9400	5.64614e-09	0.419922	0.90633	original		0.04	FALSE	FALSE	FALSE	out-of-context	{}
Mathematics	math_double	54 is to 108 as 98 is to	196	x	0.42	0	0	{'x': 0.42, 'what': 0.2, 'y': 0.15, '': 0.12, 'X': 0.03}	10948	4.97676e-09	0.417969	0.890904	original		0.04	FALSE	FALSE	FALSE	out-of-context	{}
Mathematics	math_double	58 is to 116 as 98 is to	196	x	0.42	0	0	{'x': 0.42, 'what': 0.24, 'y': 0.15, '': 0.1, 'X': 0.02}	7603	1.04774e-08	0.416016	0.924237	original		0.04	FALSE	FALSE	FALSE	out-of-context	{}
Mathematics	math_division2	44 is to 22 as 32 is to	16	x	0.42	0	0	{'x': 0.42, 'y': 0.2, 'what': 0.2, '': 0.06, '\\(': 0.04}	418	9.98378e-07	0.417968	0.995835	original		0.04	FALSE	FALSE	FALSE	out-of-context	{}
Mathematics	math_division2	44 is to 22 as 74 is to	37	x	0.42	0	0	{'x': 0.42, 'what': 0.22, 'y': 0.15, '': 0.11, '\\(': 0.02}	2909	6.00703e-08	0.421875	0.971012	original		0.04	FALSE	FALSE	FALSE	out-of-context	{}
Mathematics	math_division2	68 is to 34 as 74 is to	37	x	0.42	0	0	{'x': 0.42, 'y': 0.21, 'what': 0.14, '': 0.1, 'Y': 0.03}	2873	5.89062e-08	0.423828	0.971371	original		0.04	FALSE	FALSE	FALSE	out-of-context	{}
Mathematics	math_double	42 is to 84 as 98 is to	196	x	0.41	0	0	{'x': 0.41, 'what': 0.18, 'y': 0.15, '': 0.13, 'X': 0.04}	10922	5.3551e-09	0.414062	0.891163	original		0.04	FALSE	FALSE	FALSE	out-of-context	{}
Mathematics	math_double	78 is to 156 as 98 is to	196	x	0.41	0	0	{'x': 0.41, 'what': 0.23, '': 0.14, 'y': 0.13, 'X': 0.03}	7682	7.18865e-09	0.414062	0.923449	original		0.04	FALSE	FALSE	FALSE	out-of-context	{}
Mathematics	math_double	82 is to 164 as 84 is to	168	x	0.41	0	0	{'x': 0.41, 'what': 0.28, 'y': 0.18, '': 0.05, '\\(': 0.01}	8181	1.4028e-08	0.412109	0.918477	original		0.04	FALSE	FALSE	FALSE	out-of-context	{}
Mathematics	math_double	74 is to 148 as 98 is to	196	x	0.41	0	0	{'x': 0.41, 'what': 0.25, 'y': 0.17, '': 0.08, 'X': 0.03}	7559	7.24685e-09	0.410156	0.924675	original		0.04	FALSE	FALSE	FALSE	out-of-context	{}
Mathematics	math_division2	62 is to 31 as 74 is to	37	x	0.41	0	0	{'x': 0.41, 'y': 0.24, 'what': 0.18, '': 0.07, 'Y': 0.03}	2798	3.49246e-08	0.412109	0.972118	original		0.04	FALSE	FALSE	FALSE	out-of-context	{}
Mathematics	math_double	34 is to 68 as 84 is to	168	x	0.4	0	0	{'x': 0.4, 'y': 0.38, 'what': 0.1, '\\(': 0.05, '': 0.02}	5253	1.94414e-08	0.400391	0.947654	original		0.04	FALSE	FALSE	FALSE	out-of-context	{}
Mathematics	math_double	44 is to 88 as 84 is to	168	x	0.4	0	0	{'x': 0.4, 'what': 0.21, 'y': 0.2, '': 0.08, '\\(': 0.04}	11675	7.07223e-09	0.400391	0.88366	original		0.04	FALSE	FALSE	FALSE	out-of-context	{}
Mathematics	math_double	94 is to 188 as 98 is to	196	x	0.4	0	0	{'x': 0.4, 'what': 0.24, 'y': 0.21, '': 0.07, '\\(': 0.03}	8044	1.05356e-08	0.398437	0.919842	original		0.04	FALSE	FALSE	FALSE	out-of-context	{}
Mathematics	math_double	16 is to 32 as 98 is to	196	x	0.39	0	0	{'x': 0.39, 'what': 0.2, '': 0.17, 'y': 0.1, 'X': 0.06}	8001	1.16997e-08	0.394531	0.920271	original		0.04	FALSE	FALSE	FALSE	out-of-context	{}
Mathematics	math_double	62 is to 124 as 98 is to	196	x	0.39	0	0	{'x': 0.39, 'what': 0.25, 'y': 0.17, '': 0.09, 'X': 0.03}	8235	7.6252e-09	0.390625	0.917939	original		0.04	FALSE	FALSE	FALSE	out-of-context	{}
Mathematics	math_double	68 is to 136 as 98 is to	196	x	0.39	0	0	{'x': 0.39, 'what': 0.25, 'y': 0.13, '': 0.13, 'X': 0.03}	7380	1.05938e-08	0.390625	0.926459	original		0.04	FALSE	FALSE	FALSE	out-of-context	{}
Mathematics	math_double	86 is to 172 as 84 is to	168	x	0.38	0	0	{'x': 0.38, 'what': 0.26, 'y': 0.18, '': 0.1, '\\(': 0.02}	9648	1.10595e-08	0.375	0.903858	original		0.04	FALSE	FALSE	FALSE	out-of-context	{}
Mathematics	math_squares	26 is to 676 as 14 is to	196	x	0.38	0	0	{'x': 0.38, 'what': 0.26, '': 0.17, 'X': 0.04, 'y': 0.02}	5603	5.54137e-08	0.382812	0.944167	original		0.04	FALSE	FALSE	FALSE	out-of-context	{}
Mathematics	math_double	92 is to 184 as 98 is to	196	what	0.36	0	0	{'what': 0.36, 'x': 0.33, 'y': 0.19, '': 0.06, '\\(': 0.02}	6279	1.11759e-08	0.355469	0.93743	original		0.04	FALSE	FALSE	FALSE	out-of-context	{}
Mathematics	math_double	92 is to 184 as 84 is to	168	what	0.36	0	0	{'what': 0.36, 'x': 0.33, 'y': 0.16, '': 0.07, '\\(': 0.02}	8960	7.30506e-09	0.363281	0.910714	original		0.04	FALSE	FALSE	FALSE	out-of-context	{}
Mathematics	math_double	94 is to 188 as 84 is to	168	x	0.36	0	0	{'x': 0.36, 'what': 0.29, 'y': 0.17, '': 0.1, '\\(': 0.03}	9013	9.0804e-09	0.355469	0.910186	original		0.04	FALSE	FALSE	FALSE	out-of-context	{}
Mathematics	math_squares	26 is to 676 as 4 is to	16	x	0.36	0	0	{'x': 0.36, '': 0.31, 'what': 0.15, 'X': 0.04, '?': 0.02}	365	4.11272e-06	0.359371	0.996363	original		0.04	FALSE	FALSE	FALSE	out-of-context	{}
Mathematics	math_double	46 is to 92 as 98 is to	196	x	0.35	0	0	{'x': 0.35, 'what': 0.28, 'y': 0.2, '': 0.07, '\\(': 0.05}	10618	5.47152e-09	0.347656	0.894192	original		0.04	FALSE	FALSE	FALSE	out-of-context	{}
Mathematics	math_double	44 is to 88 as 98 is to	196	x	0.35	0	0	{'x': 0.35, 'y': 0.19, 'what': 0.18, '': 0.15, 'X': 0.03}	11307	8.96398e-09	0.349609	0.887327	original		0.04	FALSE	FALSE	FALSE	out-of-context	{}
Mathematics	math_double	46 is to 92 as 84 is to	168	x	0.35	0	0	{'x': 0.35, 'what': 0.31, 'y': 0.19, '': 0.06, '\\(': 0.04}	14051	3.23053e-09	0.351562	0.859983	original		0.04	FALSE	FALSE	FALSE	out-of-context	{}
Mathematics	math_double	98 is to 196 as 84 is to	168	x	0.34	0	0	{'x': 0.34, 'what': 0.3, 'y': 0.18, '': 0.08, '\\(': 0.03}	9499	7.15954e-09	0.34375	0.905343	original		0.04	FALSE	FALSE	FALSE	out-of-context	{}
Mathematics	math_division5	20 is to 4 as 80 is to	16	x	0.82	0	0	{'x': 0.82, 'y': 0.08, 'what': 0.03, '': 0.02, 'X': 0.01}	548	1.65775e-07	0.824219	0.994539	original		0.03	FALSE	FALSE	FALSE	out-of-context	{}
Mathematics	math_division5	20 is to 4 as 70 is to	14	x	0.81	0	0	{'x': 0.81, 'y': 0.08, 'what': 0.03, '': 0.03, 'X': 0.02}	1178	7.40401e-08	0.808594	0.988261	original		0.03	FALSE	FALSE	FALSE	out-of-context	{}
Mathematics	math_double	60 is to 120 as 8 is to	16	x	0.8	0	0	{'x': 0.8, 'y': 0.06, 'what': 0.06, '': 0.05, 'X': 0.01}	243	5.7742e-07	0.796874	0.997579	original		0.03	FALSE	FALSE	FALSE	out-of-context	{}
Mathematics	math_division5	25 is to 5 as 80 is to	16	x	0.77	0	0	{'x': 0.77, 'y': 0.08, 'what': 0.05, '': 0.04, '\\(': 0.02}	794	1.72295e-07	0.765625	0.992088	original		0.03	FALSE	FALSE	FALSE	out-of-context	{}
Mathematics	math_double	52 is to 104 as 8 is to	16	x	0.76	0	0	{'x': 0.76, 'what': 0.09, '': 0.08, 'y': 0.03, 'X': 0.02}	130	5.45382e-06	0.757807	0.998705	original		0.03	FALSE	FALSE	FALSE	out-of-context	{}
Mathematics	math_division5	25 is to 5 as 70 is to	14	x	0.76	0	0	{'x': 0.76, 'y': 0.07, 'what': 0.06, '': 0.05, '\\(': 0.02}	1153	1.15018e-07	0.757812	0.98851	original		0.03	FALSE	FALSE	FALSE	out-of-context	{}
Mathematics	math_division5	35 is to 7 as 80 is to	16	x	0.76	0	0	{'x': 0.76, 'y': 0.13, 'what': 0.03, '': 0.02, '\\(': 0.02}	776	1.546e-07	0.757812	0.992267	original		0.03	FALSE	FALSE	FALSE	out-of-context	{}
Mathematics	math_squares	30 is to 900 as 4 is to	16	x	0.75	0	0	{'x': 0.75, '': 0.08, 'what': 0.07, 'y': 0.04, 'X': 0.02}	699	2.07685e-07	0.746094	0.993035	original		0.03	FALSE	FALSE	FALSE	out-of-context	{}
Mathematics	math_division5	40 is to 8 as 80 is to	16	x	0.75	0	0	{'x': 0.75, 'y': 0.14, 'what': 0.04, '': 0.03, '\\(': 0.01}	511	2.84985e-07	0.746093	0.994908	original		0.03	FALSE	FALSE	FALSE	out-of-context	{}
Mathematics	math_division5	100 is to 20 as 80 is to	16	x	0.75	0	0	{'x': 0.75, 'y': 0.09, 'what': 0.07, 'X': 0.04, '\\(': 0.02}	1580	5.61122e-08	0.753906	0.984255	original		0.03	FALSE	FALSE	FALSE	out-of-context	{}
Mathematics	math_double	35 is to 70 as 8 is to	16	x	0.74	0	0	{'x': 0.74, '': 0.12, 'y': 0.05, 'what': 0.05, '\\(': 0.01}	340	6.85453e-07	0.738281	0.996612	original		0.03	FALSE	FALSE	FALSE	out-of-context	{}
Mathematics	math_division5	35 is to 7 as 70 is to	14	x	0.74	0	0	{'x': 0.74, 'y': 0.11, 'what': 0.06, '': 0.03, '\\(': 0.02}	1137	1.13156e-07	0.738281	0.98867	original		0.03	FALSE	FALSE	FALSE	out-of-context	{}
Mathematics	math_division5	50 is to 10 as 80 is to	16	x	0.73	0	0	{'x': 0.73, 'y': 0.1, 'what': 0.05, '': 0.05, 'X': 0.02}	779	1.69501e-07	0.730469	0.992237	original		0.03	FALSE	FALSE	FALSE	out-of-context	{}
Mathematics	math_double	75 is to 150 as 65 is to	130	x	0.72	0	0	{'x': 0.72, 'what': 0.07, 'y': 0.06, 'X': 0.05, '': 0.05}	2191	2.91038e-08	0.722656	0.978167	original		0.03	FALSE	FALSE	FALSE	out-of-context	{}
Mathematics	math_double	70 is to 140 as 8 is to	16	x	0.72	0	0	{'x': 0.72, '': 0.14, 'what': 0.06, 'y': 0.03, 'X': 0.02}	315	6.81728e-07	0.722656	0.996861	original		0.03	FALSE	FALSE	FALSE	out-of-context	{}
Mathematics	math_division2	14 is to 7 as 76 is to	38	x	0.71	0	0	{'x': 0.71, 'y': 0.11, 'what': 0.06, '': 0.04, 'X': 0.03}	11658	4.83124e-09	0.707031	0.883829	original		0.03	FALSE	FALSE	FALSE	out-of-context	{}
Mathematics	math_division5	40 is to 8 as 70 is to	14	x	0.71	0	0	{'x': 0.71, 'y': 0.16, 'what': 0.05, '': 0.03, '\\(': 0.01}	1146	9.54606e-08	0.707031	0.98858	original		0.03	FALSE	FALSE	FALSE	out-of-context	{}
Mathematics	math_division2	100 is to 50 as 32 is to	16	x	0.71	0	0	{'x': 0.71, 'y': 0.09, 'what': 0.07, '': 0.04, 'X': 0.03}	931	1.65775e-07	0.714844	0.990723	original		0.03	FALSE	FALSE	FALSE	out-of-context	{}
Mathematics	math_division2	100 is to 50 as 62 is to	31	x	0.71	0	0	{'x': 0.71, 'y': 0.07, 'what': 0.07, '': 0.05, 'X': 0.04}	9862	3.8126e-09	0.710937	0.901726	original		0.03	FALSE	FALSE	FALSE	out-of-context	{}
Mathematics	math_double	100 is to 200 as 65 is to	130	x	0.7	0	0	{'x': 0.7, 'X': 0.08, 'what': 0.06, '': 0.06, 'y': 0.06}	2509	1.9907e-08	0.703125	0.974998	original		0.03	FALSE	FALSE	FALSE	out-of-context	{}
Mathematics	math_double	62 is to 124 as 8 is to	16	x	0.7	0	0	{'x': 0.7, 'what': 0.12, '': 0.09, 'y': 0.04, 'X': 0.02}	146	4.82798e-06	0.695308	0.998545	original		0.03	FALSE	FALSE	FALSE	out-of-context	{}
Mathematics	math_double	75 is to 150 as 74 is to	148	x	0.7	0	0	{'x': 0.7, 'what': 0.1, 'y': 0.06, '': 0.05, 'X': 0.04}	9972	3.72529e-09	0.699219	0.90063	original		0.03	FALSE	FALSE	FALSE	out-of-context	{}
Mathematics	math_double	75 is to 150 as 98 is to	196	x	0.7	0	0	{'x': 0.7, 'what': 0.11, 'y': 0.06, '': 0.04, 'X': 0.03}	12513	1.52795e-09	0.703125	0.875309	original		0.03	FALSE	FALSE	FALSE	out-of-context	{}
Mathematics	math_double	72 is to 144 as 8 is to	16	x	0.7	0	0	{'x': 0.7, 'what': 0.11, '': 0.09, 'y': 0.04, 'the': 0.01}	240	1.51247e-06	0.703123	0.997608	original		0.03	FALSE	FALSE	FALSE	out-of-context	{}
Mathematics	math_division2	34 is to 17 as 94 is to	47	x	0.7	0	0	{'x': 0.7, 'y': 0.12, '': 0.06, 'what': 0.05, 'X': 0.02}	2594	3.88827e-08	0.695312	0.974151	original		0.03	FALSE	FALSE	FALSE	out-of-context	{}
Mathematics	math_division2	50 is to 25 as 94 is to	47	x	0.7	0	0	{'x': 0.7, '': 0.08, 'y': 0.08, 'what': 0.06, 'X': 0.03}	4193	1.64146e-08	0.695312	0.958217	original		0.03	FALSE	FALSE	FALSE	out-of-context	{}
Mathematics	math_division2	14 is to 7 as 94 is to	47	x	0.7	0	0	{'x': 0.7, 'y': 0.11, 'what': 0.06, '': 0.05, 'X': 0.03}	6240	1.40863e-08	0.695312	0.937819	original		0.03	FALSE	FALSE	FALSE	out-of-context	{}
Mathematics	math_division2	100 is to 50 as 28 is to	14	x	0.7	0	0	{'x': 0.7, 'y': 0.08, 'what': 0.07, '': 0.06, 'X': 0.04}	2268	4.51691e-08	0.695312	0.9774	original		0.03	FALSE	FALSE	FALSE	out-of-context	{}
Mathematics	math_division5	70 is to 14 as 80 is to	16	x	0.7	0	0	{'x': 0.7, 'y': 0.11, 'what': 0.07, '': 0.05, '\\(': 0.02}	407	5.02914e-07	0.699218	0.995944	original		0.03	FALSE	FALSE	FALSE	out-of-context	{}
Mathematics	math_division5	60 is to 12 as 70 is to	14	x	0.7	0	0	{'x': 0.7, 'y': 0.13, 'what': 0.05, '': 0.04, 'X': 0.02}	1056	1.21072e-07	0.703125	0.989477	original		0.03	FALSE	FALSE	FALSE	out-of-context	{}
Mathematics	math_double	38 is to 76 as 8 is to	16	x	0.69	0	0	{'x': 0.69, 'what': 0.11, '': 0.09, 'y': 0.05, 'X': 0.02}	198	2.92063e-06	0.691403	0.998027	original		0.03	FALSE	FALSE	FALSE	out-of-context	{}
Mathematics	math_double	75 is to 150 as 84 is to	168	x	0.69	0	0	{'x': 0.69, 'what': 0.12, 'y': 0.07, '': 0.04, 'X': 0.03}	14241	1.38971e-09	0.691406	0.85809	original		0.03	FALSE	FALSE	FALSE	out-of-context	{}
Mathematics	math_double	70 is to 140 as 65 is to	130	x	0.69	0	0	{'x': 0.69, '': 0.09, 'y': 0.08, 'what': 0.06, 'X': 0.03}	1393	8.00937e-08	0.6875	0.986119	original		0.03	FALSE	FALSE	FALSE	out-of-context	{}
Mathematics	math_division2	24 is to 12 as 64 is to	32	x	0.69	0	0	{'x': 0.69, 'y': 0.12, 'what': 0.09, '': 0.03, '\\(': 0.02}	5875	1.22818e-08	0.691406	0.941456	original		0.03	FALSE	FALSE	FALSE	out-of-context	{}
Mathematics	math_division2	28 is to 14 as 94 is to	47	x	0.69	0	0	{'x': 0.69, 'y': 0.1, 'what': 0.07, '': 0.07, 'X': 0.04}	4297	2.28174e-08	0.6875	0.957181	original		0.03	FALSE	FALSE	FALSE	out-of-context	{}
Mathematics	math_division2	28 is to 14 as 64 is to	32	x	0.69	0	0	{'x': 0.69, 'y': 0.13, 'what': 0.07, '': 0.03, 'X': 0.03}	5194	1.59489e-08	0.6875	0.948242	original		0.03	FALSE	FALSE	FALSE	out-of-context	{}
Mathematics	math_division2	40 is to 20 as 94 is to	47	x	0.69	0	0	{'x': 0.69, 'y': 0.1, '': 0.08, 'what': 0.06, 'X': 0.03}	3654	1.851e-08	0.691406	0.963588	original		0.03	FALSE	FALSE	FALSE	out-of-context	{}
Mathematics	math_division2	14 is to 7 as 64 is to	32	x	0.69	0	0	{'x': 0.69, 'y': 0.14, 'what': 0.05, '': 0.02, 'X': 0.02}	8172	1.16415e-08	0.6875	0.918567	original		0.03	FALSE	FALSE	FALSE	out-of-context	{}
Mathematics	math_division2	8 is to 4 as 32 is to	16	x	0.69	0	0	{'x': 0.69, 'y': 0.14, 'what': 0.06, 'X': 0.03, '': 0.03}	445	5.69969e-07	0.687499	0.995566	original		0.03	FALSE	FALSE	FALSE	out-of-context	{}
Mathematics	math_division2	14 is to 7 as 32 is to	16	x	0.69	0	0	{'x': 0.69, 'y': 0.14, 'what': 0.05, 'X': 0.02, '': 0.02}	742	2.64496e-07	0.691406	0.992606	original		0.03	FALSE	FALSE	FALSE	out-of-context	{}
Mathematics	math_division5	80 is to 16 as 70 is to	14	x	0.69	0	0	{'x': 0.69, 'what': 0.09, 'y': 0.07, '': 0.06, 'X': 0.03}	1122	1.30385e-07	0.691406	0.988819	original		0.03	FALSE	FALSE	FALSE	out-of-context	{}
Mathematics	math_division2	90 is to 45 as 94 is to	47	x	0.69	0	0	{'x': 0.69, 'y': 0.13, 'what': 0.06, '': 0.05, '\\(': 0.02}	2660	3.21306e-08	0.6875	0.973493	original		0.03	FALSE	FALSE	FALSE	out-of-context	{}
Mathematics	math_double	36 is to 72 as 8 is to	16	x	0.68	0	0	{'x': 0.68, 'what': 0.13, '': 0.08, 'y': 0.06, '\\(': 0.01}	216	1.66148e-06	0.679686	0.997848	original		0.03	FALSE	FALSE	FALSE	out-of-context	{}
Mathematics	math_double	26 is to 52 as 8 is to	16	x	0.68	0	0	{'x': 0.68, 'what': 0.12, '': 0.08, 'y': 0.06, 'X': 0.02}	143	8.16584e-06	0.679679	0.998575	original		0.03	FALSE	FALSE	FALSE	out-of-context	{}
Mathematics	math_division2	40 is to 20 as 64 is to	32	x	0.68	0	0	{'x': 0.68, 'y': 0.15, 'what': 0.05, '': 0.04, 'X': 0.02}	3817	2.24682e-08	0.683594	0.961964	original		0.03	FALSE	FALSE	FALSE	out-of-context	{}
Mathematics	math_squares	15 is to 225 as 4 is to	16	x	0.68	0	0	{'x': 0.68, '': 0.15, 'what': 0.07, 'y': 0.03, 'X': 0.02}	764	2.14204e-07	0.679687	0.992387	original		0.03	FALSE	FALSE	FALSE	out-of-context	{}
Mathematics	math_double	20 is to 40 as 8 is to	16	x	0.67	0	0	{'x': 0.67, 'what': 0.11, '': 0.09, 'y': 0.08, 'X': 0.01}	153	3.59118e-06	0.671871	0.998475	original		0.03	FALSE	FALSE	FALSE	out-of-context	{}
Mathematics	math_double	100 is to 200 as 8 is to	16	x	0.67	0	0	{'x': 0.67, 'what': 0.14, '': 0.09, 'y': 0.04, 'X': 0.03}	384	4.71249e-07	0.667968	0.996173	original		0.03	FALSE	FALSE	FALSE	out-of-context	{}
Mathematics	math_double	70 is to 140 as 74 is to	148	x	0.67	0	0	{'x': 0.67, 'what': 0.1, 'y': 0.09, '': 0.08, 'X': 0.02}	6409	7.01402e-09	0.671875	0.936135	original		0.03	FALSE	FALSE	FALSE	out-of-context	{}
Mathematics	math_squares	20 is to 400 as 4 is to	16	x	0.67	0	0	{'x': 0.67, '': 0.14, 'what': 0.06, 'X': 0.05, 'y': 0.03}	736	3.76254e-07	0.667968	0.992666	original		0.03	FALSE	FALSE	FALSE	out-of-context	{}
Mathematics	math_double	90 is to 180 as 8 is to	16	x	0.66	0	0	{'x': 0.66, 'what': 0.11, '': 0.1, 'y': 0.06, 'X': 0.02}	373	7.37607e-07	0.660156	0.996283	original		0.03	FALSE	FALSE	FALSE	out-of-context	{}
Mathematics	math_double	100 is to 200 as 30 is to	60	x	0.66	0	0	{'x': 0.66, 'what': 0.1, 'X': 0.08, 'y': 0.07, '': 0.04}	1073	6.75209e-08	0.65625	0.989308	original		0.03	FALSE	FALSE	FALSE	out-of-context	{}
Mathematics	math_double	90 is to 180 as 65 is to	130	x	0.66	0	0	{'x': 0.66, 'y': 0.1, 'what': 0.07, '': 0.07, 'X': 0.04}	1707	5.68107e-08	0.664062	0.98299	original		0.03	FALSE	FALSE	FALSE	out-of-context	{}
Mathematics	math_division2	30 is to 15 as 32 is to	16	x	0.66	0	0	{'x': 0.66, 'y': 0.14, 'what': 0.08, '': 0.05, 'X': 0.03}	496	3.70666e-07	0.65625	0.995057	original		0.03	FALSE	FALSE	FALSE	out-of-context	{}
Mathematics	math_division2	28 is to 14 as 62 is to	31	x	0.66	0	0	{'x': 0.66, 'y': 0.11, 'what': 0.08, '': 0.06, 'X': 0.04}	7172	1.00699e-08	0.65625	0.928532	original		0.03	FALSE	FALSE	FALSE	out-of-context	{}
Mathematics	math_division2	20 is to 10 as 94 is to	47	x	0.66	0	0	{'x': 0.66, '': 0.1, 'what': 0.09, 'y': 0.08, 'X': 0.02}	4812	1.66474e-08	0.664062	0.952049	original		0.03	FALSE	FALSE	FALSE	out-of-context	{}
Mathematics	math_division2	80 is to 40 as 94 is to	47	x	0.66	0	0	{'x': 0.66, 'y': 0.12, '': 0.09, 'what': 0.05, 'X': 0.03}	3441	2.11876e-08	0.664062	0.965711	original		0.03	FALSE	FALSE	FALSE	out-of-context	{}
Mathematics	math_double	34 is to 68 as 8 is to	16	x	0.65	0	0	{'x': 0.65, 'y': 0.17, 'what': 0.06, '': 0.04, '\\(': 0.02}	236	3.54648e-06	0.65234	0.997648	original		0.03	FALSE	FALSE	FALSE	out-of-context	{}
Mathematics	math_division2	24 is to 12 as 62 is to	31	x	0.65	0	0	{'x': 0.65, 'what': 0.11, 'y': 0.09, '': 0.07, 'X': 0.02}	8202	5.76256e-09	0.652344	0.918268	original		0.03	FALSE	FALSE	FALSE	out-of-context	{}
Mathematics	math_division2	50 is to 25 as 64 is to	32	x	0.65	0	0	{'x': 0.65, 'y': 0.12, 'what': 0.07, '': 0.05, 'X': 0.03}	5782	1.67638e-08	0.652344	0.942383	original		0.03	FALSE	FALSE	FALSE	out-of-context	{}
Mathematics	math_division2	40 is to 20 as 62 is to	31	x	0.65	0	0	{'x': 0.65, 'y': 0.12, '': 0.09, 'what': 0.07, 'X': 0.03}	6558	7.74162e-09	0.652344	0.93465	original		0.03	FALSE	FALSE	FALSE	out-of-context	{}
Mathematics	math_squares	12 is to 144 as 4 is to	16	x	0.65	0	0	{'x': 0.65, 'what': 0.11, '': 0.09, 'y': 0.08, 'the': 0.02}	584	4.26546e-07	0.648437	0.99418	original		0.03	FALSE	FALSE	FALSE	out-of-context	{}
Mathematics	math_division2	20 is to 10 as 62 is to	31	x	0.65	0	0	{'x': 0.65, 'y': 0.1, 'what': 0.1, '': 0.08, 'X': 0.03}	7857	7.30506e-09	0.652344	0.921706	original		0.03	FALSE	FALSE	FALSE	out-of-context	{}
Mathematics	math_division2	6 is to 3 as 32 is to	16	x	0.65	0	0	{'x': 0.65, 'y': 0.15, 'what': 0.09, '': 0.03, 'X': 0.03}	604	3.72529e-07	0.652343	0.993981	original		0.03	FALSE	FALSE	FALSE	out-of-context	{}
Mathematics	math_division2	14 is to 7 as 28 is to	14	x	0.65	0	0	{'x': 0.65, 'y': 0.16, 'what': 0.07, 'X': 0.03, '': 0.03}	1489	1.11759e-07	0.652344	0.985162	original		0.03	FALSE	FALSE	FALSE	out-of-context	{}
Mathematics	math_division2	10 is to 5 as 32 is to	16	x	0.65	0	0	{'x': 0.65, 'y': 0.16, 'what': 0.08, '': 0.04, 'X': 0.03}	502	5.06639e-07	0.648437	0.994998	original		0.03	FALSE	FALSE	FALSE	out-of-context	{}
Mathematics	math_division5	45 is to 9 as 80 is to	16	x	0.65	0	0	{'x': 0.65, 'y': 0.14, '': 0.08, 'what': 0.05, '\\(': 0.03}	450	4.35859e-07	0.648437	0.995516	original		0.03	FALSE	FALSE	FALSE	out-of-context	{}
Mathematics	math_division5	45 is to 9 as 70 is to	14	x	0.65	0	0	{'x': 0.65, 'y': 0.12, '': 0.1, 'what': 0.05, '\\(': 0.03}	941	1.72295e-07	0.648437	0.990623	original		0.03	FALSE	FALSE	FALSE	out-of-context	{}
Mathematics	math_division5	90 is to 18 as 80 is to	16	x	0.65	0	0	{'x': 0.65, 'y': 0.11, 'what': 0.08, '': 0.06, 'X': 0.03}	719	2.77534e-07	0.652343	0.992835	original		0.03	FALSE	FALSE	FALSE	out-of-context	{}
Mathematics	math_double	50 is to 100 as 65 is to	130	x	0.64	0	0	{'x': 0.64, 'y': 0.1, '': 0.07, 'what': 0.06, 'X': 0.06}	1649	6.14673e-08	0.636719	0.983568	original		0.03	FALSE	FALSE	FALSE	out-of-context	{}
Mathematics	math_double	6 is to 12 as 98 is to	196	x	0.64	0	0	{'x': 0.64, 'y': 0.11, 'what': 0.07, '': 0.07, 'X': 0.05}	12558	3.87081e-09	0.640625	0.87486	original		0.03	FALSE	FALSE	FALSE	out-of-context	{}
Mathematics	math_double	24 is to 48 as 8 is to	16	x	0.64	0	0	{'x': 0.64, 'what': 0.16, 'y': 0.07, '': 0.07, '\\(': 0.01}	156	3.71039e-06	0.644528	0.998445	original		0.03	FALSE	FALSE	FALSE	out-of-context	{}
Mathematics	math_double	60 is to 120 as 16 is to	32	x	0.64	0	0	{'x': 0.64, '': 0.12, 'y': 0.1, 'what': 0.06, 'X': 0.04}	3215	1.87429e-08	0.644531	0.967963	original		0.03	FALSE	FALSE	FALSE	out-of-context	{}
Mathematics	math_double	58 is to 116 as 8 is to	16	x	0.64	0	0	{'x': 0.64, 'what': 0.15, '': 0.12, 'y': 0.03, 'X': 0.02}	209	2.41399e-06	0.636716	0.997917	original		0.03	FALSE	FALSE	FALSE	out-of-context	{}
Mathematics	math_double	70 is to 140 as 28 is to	56	x	0.64	0	0	{'x': 0.64, '': 0.12, 'what': 0.09, 'y': 0.06, 'X': 0.04}	2587	3.14321e-08	0.644531	0.974221	original		0.03	FALSE	FALSE	FALSE	out-of-context	{}
Mathematics	math_division2	22 is to 11 as 94 is to	47	x	0.64	0	0	{'x': 0.64, 'y': 0.13, 'what': 0.08, '': 0.06, '\\(': 0.02}	4348	2.75904e-08	0.636719	0.956673	original		0.03	FALSE	FALSE	FALSE	out-of-context	{}
Mathematics	math_division2	50 is to 25 as 62 is to	31	x	0.64	0	0	{'x': 0.64, 'y': 0.1, 'what': 0.07, '': 0.07, 'X': 0.04}	7885	6.60657e-09	0.644531	0.921427	original		0.03	FALSE	FALSE	FALSE	out-of-context	{}
Mathematics	math_squares	24 is to 576 as 4 is to	16	x	0.64	0	0	{'x': 0.64, '': 0.15, 'what': 0.09, 'X': 0.04, 'y': 0.03}	656	5.99772e-07	0.636718	0.993463	original		0.03	FALSE	FALSE	FALSE	out-of-context	{}
Mathematics	math_division2	20 is to 10 as 32 is to	16	x	0.64	0	0	{'x': 0.64, 'y': 0.15, 'what': 0.1, '': 0.05, 'X': 0.02}	362	6.63102e-07	0.636718	0.996393	original		0.03	FALSE	FALSE	FALSE	out-of-context	{}
Mathematics	math_division2	10 is to 5 as 62 is to	31	x	0.64	0	0	{'x': 0.64, 'y': 0.13, 'what': 0.07, '': 0.06, 'X': 0.03}	8875	8.61473e-09	0.640625	0.911561	original		0.03	FALSE	FALSE	FALSE	out-of-context	{}
Mathematics	math_division2	10 is to 5 as 94 is to	47	x	0.64	0	0	{'x': 0.64, 'y': 0.13, '': 0.08, 'what': 0.07, 'X': 0.03}	7124	1.30385e-08	0.636719	0.92901	original		0.03	FALSE	FALSE	FALSE	out-of-context	{}
Mathematics	math_division2	70 is to 35 as 64 is to	32	x	0.64	0	0	{'x': 0.64, 'y': 0.15, 'what': 0.06, '': 0.05, '\\(': 0.02}	6317	1.93249e-08	0.636719	0.937052	original		0.03	FALSE	FALSE	FALSE	out-of-context	{}
Mathematics	math_double	40 is to 80 as 65 is to	130	x	0.63	0	0	{'x': 0.63, 'y': 0.12, '': 0.1, 'X': 0.05, 'what': 0.04}	1014	1.21072e-07	0.632812	0.989896	original		0.03	FALSE	FALSE	FALSE	out-of-context	{}
Mathematics	math_double	100 is to 200 as 74 is to	148	x	0.63	0	0	{'x': 0.63, 'what': 0.1, '': 0.08, 'X': 0.08, 'y': 0.05}	10362	2.79397e-09	0.632812	0.896743	original		0.03	FALSE	FALSE	FALSE	out-of-context	{}
Mathematics	math_division2	34 is to 17 as 64 is to	32	x	0.63	0	0	{'x': 0.63, 'y': 0.18, 'what': 0.05, '': 0.04, '\\(': 0.03}	4774	2.06055e-08	0.628906	0.952427	original		0.03	FALSE	FALSE	FALSE	out-of-context	{}
Mathematics	math_division2	4 is to 2 as 32 is to	16	x	0.63	0	0	{'x': 0.63, 'y': 0.13, 'what': 0.09, '': 0.05, 'X': 0.05}	512	7.22706e-07	0.632812	0.994898	original		0.03	FALSE	FALSE	FALSE	out-of-context	{}
Mathematics	math_division2	8 is to 4 as 94 is to	47	x	0.63	0	0	{'x': 0.63, 'y': 0.12, '': 0.09, 'what': 0.07, 'X': 0.03}	5358	2.21189e-08	0.632812	0.946608	original		0.03	FALSE	FALSE	FALSE	out-of-context	{}
Mathematics	math_division2	6 is to 3 as 94 is to	47	x	0.63	0	0	{'x': 0.63, 'y': 0.12, '': 0.09, 'what': 0.08, 'X': 0.03}	5831	2.11876e-08	0.628906	0.941895	original		0.03	FALSE	FALSE	FALSE	out-of-context	{}
Mathematics	math_division2	12 is to 6 as 94 is to	47	x	0.63	0	0	{'x': 0.63, 'y': 0.12, '': 0.12, 'what': 0.06, 'X': 0.02}	4266	2.20025e-08	0.628906	0.95749	original		0.03	FALSE	FALSE	FALSE	out-of-context	{}
Mathematics	math_division2	70 is to 35 as 62 is to	31	x	0.63	0	0	{'x': 0.63, 'y': 0.13, '': 0.07, 'what': 0.06, '\\(': 0.03}	8421	8.14907e-09	0.632812	0.916085	original		0.03	FALSE	FALSE	FALSE	out-of-context	{}
Mathematics	math_double	35 is to 70 as 84 is to	168	x	0.62	0	0	{'x': 0.62, 'y': 0.16, 'what': 0.09, '': 0.05, '\\(': 0.03}	15190	1.53523e-09	0.617187	0.848633	original		0.03	FALSE	FALSE	FALSE	out-of-context	{}
Mathematics	math_double	30 is to 60 as 65 is to	130	x	0.62	0	0	{'x': 0.62, 'y': 0.11, '': 0.09, 'X': 0.06, 'what': 0.05}	1714	6.33299e-08	0.625	0.98292	original		0.03	FALSE	FALSE	FALSE	out-of-context	{}
Mathematics	math_double	50 is to 100 as 84 is to	168	x	0.62	0	0	{'x': 0.62, 'what': 0.11, 'y': 0.1, '': 0.07, 'X': 0.04}	17481	1.35333e-09	0.617187	0.825803	original		0.03	FALSE	FALSE	FALSE	out-of-context	{}
Mathematics	math_double	54 is to 108 as 8 is to	16	x	0.62	0	0	{'x': 0.62, 'what': 0.15, '': 0.12, 'y': 0.06, 'X': 0.01}	229	1.45286e-06	0.621092	0.997718	original		0.03	FALSE	FALSE	FALSE	out-of-context	{}
Mathematics	math_double	6 is to 12 as 74 is to	148	x	0.62	0	0	{'x': 0.62, 'y': 0.1, 'what': 0.09, '': 0.08, 'X': 0.05}	13457	5.06407e-09	0.621094	0.865902	original		0.03	FALSE	FALSE	FALSE	out-of-context	{}
Mathematics	math_double	6 is to 12 as 65 is to	130	x	0.62	0	0	{'x': 0.62, 'y': 0.11, '': 0.08, 'what': 0.06, 'X': 0.06}	8535	1.24564e-08	0.617187	0.914949	original		0.03	FALSE	FALSE	FALSE	out-of-context	{}
Mathematics	math_double	25 is to 50 as 8 is to	16	x	0.62	0	0	{'x': 0.62, '': 0.13, 'what': 0.12, 'y': 0.07, 'X': 0.02}	230	1.11014e-06	0.617186	0.997708	original		0.03	FALSE	FALSE	FALSE	out-of-context	{}
Mathematics	math_double	95 is to 190 as 74 is to	148	x	0.62	0	0	{'x': 0.62, 'y': 0.11, 'what': 0.1, '': 0.07, '\\(': 0.04}	8508	7.18865e-09	0.621094	0.915218	original		0.03	FALSE	FALSE	FALSE	out-of-context	{}
Mathematics	math_double	60 is to 120 as 98 is to	196	x	0.62	0	0	{'x': 0.62, 'y': 0.12, 'what': 0.11, '': 0.07, 'X': 0.04}	11463	2.28465e-09	0.625	0.885772	original		0.03	FALSE	FALSE	FALSE	out-of-context	{}
Mathematics	math_double	65 is to 130 as 74 is to	148	x	0.62	0	0	{'x': 0.62, 'y': 0.15, 'what': 0.1, '': 0.05, '\\(': 0.03}	9674	3.56522e-09	0.617187	0.903599	original		0.03	FALSE	FALSE	FALSE	out-of-context	{}
Mathematics	math_double	56 is to 112 as 8 is to	16	x	0.62	0	0	{'x': 0.62, '': 0.14, 'what': 0.14, 'y': 0.04, '\\(': 0.01}	121	1.16825e-05	0.624988	0.998794	original		0.03	FALSE	FALSE	FALSE	out-of-context	{}
Mathematics	math_division2	36 is to 18 as 94 is to	47	x	0.62	0	0	{'x': 0.62, '': 0.12, 'y': 0.12, 'what': 0.07, 'X': 0.03}	2891	2.70084e-08	0.621094	0.971191	original		0.03	FALSE	FALSE	FALSE	out-of-context	{}
Mathematics	math_division2	26 is to 13 as 62 is to	31	x	0.62	0	0	{'x': 0.62, 'y': 0.14, 'what': 0.09, '': 0.05, 'X': 0.04}	5350	1.19326e-08	0.625	0.946688	original		0.03	FALSE	FALSE	FALSE	out-of-context	{}
Mathematics	math_division2	24 is to 12 as 32 is to	16	x	0.62	0	0	{'x': 0.62, 'y': 0.14, 'what': 0.13, '': 0.03, 'X': 0.02}	291	8.49366e-07	0.624999	0.9971	original		0.03	FALSE	FALSE	FALSE	out-of-context	{}
Mathematics	math_division2	50 is to 25 as 28 is to	14	x	0.62	0	0	{'x': 0.62, 'y': 0.1, 'what': 0.1, '': 0.08, 'X': 0.04}	1856	6.89179e-08	0.617187	0.981505	original		0.03	FALSE	FALSE	FALSE	out-of-context	{}
Mathematics	math_division2	48 is to 24 as 94 is to	47	x	0.62	0	0	{'x': 0.62, 'y': 0.11, '': 0.09, 'what': 0.09, 'X': 0.03}	3067	4.02797e-08	0.617187	0.969438	original		0.03	FALSE	FALSE	FALSE	out-of-context	{}
Mathematics	math_division5	85 is to 17 as 80 is to	16	x	0.62	0	0	{'x': 0.62, 'what': 0.11, 'y': 0.1, '': 0.05, '\\(': 0.03}	533	6.48201e-07	0.624999	0.994689	original		0.03	FALSE	FALSE	FALSE	out-of-context	{}
Mathematics	math_division5	95 is to 19 as 80 is to	16	x	0.62	0	0	{'x': 0.62, 'what': 0.12, 'y': 0.09, '': 0.05, '\\(': 0.04}	610	4.30271e-07	0.625	0.993921	original		0.03	FALSE	FALSE	FALSE	out-of-context	{}
Mathematics	math_division2	90 is to 45 as 64 is to	32	x	0.62	0	0	{'x': 0.62, 'y': 0.14, 'what': 0.08, '': 0.06, '\\(': 0.03}	5765	1.73459e-08	0.617187	0.942552	original		0.03	FALSE	FALSE	FALSE	out-of-context	{}
Mathematics	math_division2	80 is to 40 as 32 is to	16	x	0.62	0	0	{'x': 0.62, 'y': 0.14, '': 0.1, 'what': 0.05, 'X': 0.03}	820	3.03611e-07	0.625	0.991829	original		0.03	FALSE	FALSE	FALSE	out-of-context	{}
Mathematics	math_double	28 is to 56 as 8 is to	16	x	0.61	0	0	{'x': 0.61, 'what': 0.19, '': 0.07, 'y': 0.06, 'X': 0.02}	145	7.09295e-06	0.609368	0.998555	original		0.03	FALSE	FALSE	FALSE	out-of-context	{}
Mathematics	math_double	20 is to 40 as 65 is to	130	x	0.61	0	0	{'x': 0.61, '': 0.11, 'y': 0.11, 'X': 0.06, 'what': 0.05}	2018	3.63216e-08	0.605469	0.979891	original		0.03	FALSE	FALSE	FALSE	out-of-context	{}
Mathematics	math_double	85 is to 170 as 8 is to	16	x	0.61	0	0	{'x': 0.61, '': 0.17, 'what': 0.11, 'y': 0.06, 'X': 0.02}	662	4.04194e-07	0.605468	0.993403	original		0.03	FALSE	FALSE	FALSE	out-of-context	{}
Mathematics	math_double	80 is to 160 as 8 is to	16	x	0.61	0	0	{'x': 0.61, '': 0.21, 'what': 0.08, 'y': 0.03, 'X': 0.02}	346	8.82894e-07	0.605468	0.996552	original		0.03	FALSE	FALSE	FALSE	out-of-context	{}
Mathematics	math_double	78 is to 156 as 8 is to	16	x	0.61	0	0	{'x': 0.61, 'what': 0.16, '': 0.13, 'y': 0.04, 'X': 0.02}	404	8.04663e-07	0.605468	0.995974	original		0.03	FALSE	FALSE	FALSE	out-of-context	{}
Mathematics	math_double	60 is to 120 as 74 is to	148	x	0.61	0	0	{'x': 0.61, 'y': 0.12, 'what': 0.11, '': 0.07, 'X': 0.03}	6781	5.61704e-09	0.613281	0.932428	original		0.03	FALSE	FALSE	FALSE	out-of-context	{}
Mathematics	math_double	72 is to 144 as 65 is to	130	x	0.61	0	0	{'x': 0.61, '': 0.1, 'y': 0.1, 'what': 0.1, 'X': 0.03}	3512	3.21306e-08	0.613281	0.965003	original		0.03	FALSE	FALSE	FALSE	out-of-context	{}
Mathematics	math_double	66 is to 132 as 8 is to	16	x	0.61	0	0	{'x': 0.61, 'what': 0.15, '': 0.14, 'y': 0.04, 'X': 0.02}	177	2.5481e-06	0.613279	0.998236	original		0.03	FALSE	FALSE	FALSE	out-of-context	{}
Mathematics	math_division2	26 is to 13 as 32 is to	16	x	0.61	0	0	{'x': 0.61, 'y': 0.2, 'what': 0.06, 'X': 0.03, '\\(': 0.02}	327	8.23289e-07	0.609374	0.996741	original		0.03	FALSE	FALSE	FALSE	out-of-context	{}
Mathematics	math_division5	5 is to 1 as 80 is to	16	x	0.61	0	0	{'x': 0.61, '': 0.11, 'y': 0.08, 'X': 0.05, 'the': 0.05}	2607	2.42144e-07	0.609375	0.974021	original		0.03	FALSE	FALSE	FALSE	out-of-context	{}
Mathematics	math_division2	70 is to 35 as 32 is to	16	x	0.61	0	0	{'x': 0.61, 'y': 0.13, '': 0.1, 'what': 0.06, '\\(': 0.02}	769	4.09782e-07	0.605468	0.992337	original		0.03	FALSE	FALSE	FALSE	out-of-context	{}
Mathematics	math_division2	80 is to 40 as 28 is to	14	x	0.61	0	0	{'x': 0.61, 'y': 0.12, '': 0.12, 'what': 0.05, 'X': 0.04}	1833	9.31323e-08	0.609375	0.981734	original		0.03	FALSE	FALSE	FALSE	out-of-context	{}
Mathematics	math_double	30 is to 60 as 28 is to	56	x	0.6	0	0	{'x': 0.6, 'y': 0.17, 'what': 0.09, '': 0.06, 'X': 0.03}	4469	1.30967e-08	0.601562	0.955467	original		0.03	FALSE	FALSE	FALSE	out-of-context	{}
Mathematics	math_double	50 is to 100 as 74 is to	148	x	0.6	0	0	{'x': 0.6, 'what': 0.12, '': 0.08, 'y': 0.08, 'X': 0.05}	8855	4.88944e-09	0.601562	0.911761	original		0.03	FALSE	FALSE	FALSE	out-of-context	{}
Mathematics	math_double	85 is to 170 as 65 is to	130	x	0.6	0	0	{'x': 0.6, '': 0.12, 'what': 0.1, 'y': 0.08, 'X': 0.04}	1005	1.47149e-07	0.601562	0.989985	original		0.03	FALSE	FALSE	FALSE	out-of-context	{}
Mathematics	math_double	84 is to 168 as 8 is to	16	x	0.6	0	0	{'x': 0.6, '': 0.16, 'what': 0.14, 'y': 0.03, 'X': 0.03}	265	2.04146e-06	0.60156	0.997359	original		0.03	FALSE	FALSE	FALSE	out-of-context	{}
Mathematics	math_division2	40 is to 20 as 28 is to	14	x	0.6	0	0	{'x': 0.6, 'y': 0.14, 'what': 0.11, '': 0.07, 'X': 0.03}	1501	9.17353e-08	0.601562	0.985043	original		0.03	FALSE	FALSE	FALSE	out-of-context	{}
Mathematics	math_squares	16 is to 256 as 4 is to	16	x	0.6	0	0	{'x': 0.6, 'what': 0.15, '': 0.09, 'X': 0.05, 'y': 0.04}	321	1.62423e-06	0.597655	0.996801	original		0.03	FALSE	FALSE	FALSE	out-of-context	{}
Mathematics	math_division2	72 is to 36 as 94 is to	47	x	0.6	0	0	{'x': 0.6, 'y': 0.13, '': 0.1, 'what': 0.09, '\\(': 0.02}	2379	4.74975e-08	0.601562	0.976293	original		0.03	FALSE	FALSE	FALSE	out-of-context	{}
Mathematics	math_division2	86 is to 43 as 28 is to	14	x	0.6	0	0	{'x': 0.6, 'y': 0.21, 'what': 0.05, '\\(': 0.03, 'X': 0.03}	1169	1.05239e-07	0.601562	0.988351	original		0.03	FALSE	FALSE	FALSE	out-of-context	{}
Mathematics	math_double	36 is to 72 as 65 is to	130	x	0.59	0	0	{'x': 0.59, 'y': 0.11, '': 0.11, 'what': 0.09, 'X': 0.03}	3523	2.92202e-08	0.585937	0.964894	original		0.03	FALSE	FALSE	FALSE	out-of-context	{}
Mathematics	math_double	42 is to 84 as 8 is to	16	x	0.59	0	0	{'x': 0.59, 'what': 0.15, '': 0.13, 'y': 0.06, '\\(': 0.02}	154	6.52671e-06	0.585931	0.998465	original		0.03	FALSE	FALSE	FALSE	out-of-context	{}
Mathematics	math_double	30 is to 60 as 74 is to	148	x	0.59	0	0	{'x': 0.59, '': 0.12, 'y': 0.11, 'what': 0.09, 'X': 0.05}	7864	6.63567e-09	0.585937	0.921636	original		0.03	FALSE	FALSE	FALSE	out-of-context	{}
Mathematics	math_double	96 is to 192 as 8 is to	16	x	0.59	0	0	{'x': 0.59, 'what': 0.17, '': 0.13, 'y': 0.04, 'the': 0.01}	179	3.93391e-06	0.593746	0.998216	original		0.03	FALSE	FALSE	FALSE	out-of-context	{}
Mathematics	math_double	90 is to 180 as 74 is to	148	x	0.59	0	0	{'x': 0.59, 'what': 0.13, 'y': 0.1, '': 0.08, 'X': 0.03}	8535	5.84987e-09	0.59375	0.914949	original		0.03	FALSE	FALSE	FALSE	out-of-context	{}
Mathematics	math_division2	52 is to 26 as 94 is to	47	x	0.59	0	0	{'x': 0.59, 'y': 0.16, 'what': 0.11, '': 0.05, 'X': 0.03}	2146	4.84288e-08	0.589844	0.978615	original		0.03	FALSE	FALSE	FALSE	out-of-context	{}
Mathematics	math_division5	5 is to 1 as 70 is to	14	x	0.59	0	0	{'x': 0.59, '': 0.12, 'y': 0.08, 'X': 0.05, 'the': 0.04}	4471	1.33179e-07	0.59375	0.955447	original		0.03	FALSE	FALSE	FALSE	out-of-context	{}
Mathematics	math_division2	96 is to 48 as 64 is to	32	x	0.59	0	0	{'x': 0.59, 'y': 0.14, 'what': 0.11, '': 0.06, 'X': 0.03}	3833	3.18978e-08	0.585937	0.961804	original		0.03	FALSE	FALSE	FALSE	out-of-context	{}
Mathematics	math_double	36 is to 72 as 84 is to	168	x	0.58	0	0	{'x': 0.58, 'y': 0.17, 'what': 0.11, '': 0.06, '\\(': 0.03}	14149	2.2701e-09	0.582031	0.859006	original		0.03	FALSE	FALSE	FALSE	out-of-context	{}
Mathematics	math_double	35 is to 70 as 65 is to	130	x	0.58	0	0	{'x': 0.58, 'y': 0.13, '': 0.1, 'what': 0.06, 'X': 0.04}	1491	8.70787e-08	0.582031	0.985142	original		0.03	FALSE	FALSE	FALSE	out-of-context	{}
Mathematics	math_double	45 is to 90 as 8 is to	16	x	0.58	0	0	{'x': 0.58, 'what': 0.15, '': 0.14, 'y': 0.07, '\\(': 0.02}	188	2.5034e-06	0.582029	0.998127	original		0.03	FALSE	FALSE	FALSE	out-of-context	{}
Mathematics	math_double	24 is to 48 as 65 is to	130	x	0.58	0	0	{'x': 0.58, '': 0.1, 'what': 0.1, 'y': 0.09, 'X': 0.05}	4380	2.33995e-08	0.582031	0.956354	original		0.03	FALSE	FALSE	FALSE	out-of-context	{}
Mathematics	math_double	86 is to 172 as 8 is to	16	x	0.58	0	0	{'x': 0.58, '': 0.17, 'what': 0.13, 'y': 0.04, '?': 0.02}	281	2.27988e-06	0.582029	0.9972	original		0.03	FALSE	FALSE	FALSE	out-of-context	{}
Mathematics	math_division2	38 is to 19 as 94 is to	47	x	0.58	0	0	{'x': 0.58, 'y': 0.17, 'what': 0.1, '': 0.05, 'X': 0.04}	2250	4.47035e-08	0.582031	0.977579	original		0.03	FALSE	FALSE	FALSE	out-of-context	{}
Mathematics	math_division2	56 is to 28 as 94 is to	47	x	0.58	0	0	{'x': 0.58, 'y': 0.15, 'what': 0.11, '': 0.08, 'X': 0.02}	2106	4.02797e-08	0.582031	0.979014	original		0.03	FALSE	FALSE	FALSE	out-of-context	{}
Mathematics	math_division2	86 is to 43 as 94 is to	47	x	0.58	0	0	{'x': 0.58, 'y': 0.24, 'what': 0.05, '': 0.03, 'Y': 0.03}	2551	3.28291e-08	0.578125	0.974579	original		0.03	FALSE	FALSE	FALSE	out-of-context	{}
Mathematics	math_double	14 is to 28 as 8 is to	16	x	0.57	0	0	{'x': 0.57, 'what': 0.26, 'y': 0.06, '': 0.05, 'X': 0.02}	160	3.8445e-06	0.570309	0.998406	original		0.03	FALSE	FALSE	FALSE	out-of-context	{}
Mathematics	math_double	12 is to 24 as 98 is to	196	x	0.57	0	0	{'x': 0.57, '': 0.13, 'what': 0.13, 'y': 0.07, 'X': 0.04}	14260	2.59024e-09	0.566406	0.8579	original		0.03	FALSE	FALSE	FALSE	out-of-context	{}
Mathematics	math_double	6 is to 12 as 8 is to	16	x	0.57	0	0	{'x': 0.57, 'y': 0.24, 'what': 0.08, '': 0.05, 'X': 0.02}	168	2.99513e-06	0.57031	0.998326	original		0.03	FALSE	FALSE	FALSE	out-of-context	{}
Mathematics	math_double	80 is to 160 as 74 is to	148	x	0.57	0	0	{'x': 0.57, '': 0.16, 'what': 0.1, 'y': 0.08, 'X': 0.04}	7150	7.79983e-09	0.570312	0.928751	original		0.03	FALSE	FALSE	FALSE	out-of-context	{}
Mathematics	math_double	90 is to 180 as 28 is to	56	x	0.57	0	0	{'x': 0.57, 'what': 0.11, '': 0.1, 'y': 0.1, 'X': 0.04}	2964	3.39933e-08	0.574219	0.970464	original		0.03	FALSE	FALSE	FALSE	out-of-context	{}
Mathematics	math_double	92 is to 184 as 8 is to	16	x	0.57	0	0	{'x': 0.57, 'what': 0.22, '': 0.12, 'y': 0.03, 'X': 0.02}	288	1.37091e-06	0.570311	0.99713	original		0.03	FALSE	FALSE	FALSE	out-of-context	{}
Mathematics	math_double	94 is to 188 as 8 is to	16	x	0.57	0	0	{'x': 0.57, '': 0.16, 'what': 0.16, 'y': 0.06, 'X': 0.02}	361	1.01328e-06	0.566405	0.996403	original		0.03	FALSE	FALSE	FALSE	out-of-context	{}
Mathematics	math_division2	4 is to 2 as 62 is to	31	x	0.57	0	0	{'x': 0.57, '': 0.11, 'y': 0.1, 'what': 0.09, 'X': 0.06}	6110	2.7474e-08	0.566406	0.939114	original		0.03	FALSE	FALSE	FALSE	out-of-context	{}
Mathematics	math_division2	2 is to 1 as 28 is to	14	x	0.57	0	0	{'x': 0.57, '': 0.13, 'y': 0.09, 'X': 0.07, 'what': 0.06}	942	8.23289e-07	0.566405	0.990613	original		0.03	FALSE	FALSE	FALSE	out-of-context	{}
Mathematics	math_division2	18 is to 9 as 94 is to	47	x	0.57	0	0	{'x': 0.57, 'y': 0.16, 'what': 0.1, '': 0.09, 'X': 0.02}	3738	3.07336e-08	0.570312	0.962751	original		0.03	FALSE	FALSE	FALSE	out-of-context	{}
Mathematics	math_division2	96 is to 48 as 32 is to	16	x	0.57	0	0	{'x': 0.57, 'y': 0.17, 'what': 0.1, '': 0.06, '\\(': 0.03}	651	4.19095e-07	0.574218	0.993513	original		0.03	FALSE	FALSE	FALSE	out-of-context	{}
Mathematics	math_double	5 is to 10 as 65 is to	130	x	0.57	0	0	{'x': 0.57, 'y': 0.11, 'what': 0.11, '': 0.08, 'X': 0.05}	4335	2.45636e-08	0.574219	0.956802	original		0.03	FALSE	FALSE	FALSE	out-of-context	{}
Mathematics	math_division2	90 is to 45 as 32 is to	16	x	0.57	0	0	{'x': 0.57, 'y': 0.16, 'what': 0.09, '': 0.08, 'X': 0.03}	663	4.02331e-07	0.570312	0.993393	original		0.03	FALSE	FALSE	FALSE	out-of-context	{}
Mathematics	math_double	40 is to 80 as 74 is to	148	x	0.56	0	0	{'x': 0.56, '': 0.12, 'y': 0.12, 'what': 0.11, 'X': 0.04}	8300	6.72298e-09	0.5625	0.917291	original		0.03	FALSE	FALSE	FALSE	out-of-context	{}
Mathematics	math_double	48 is to 96 as 65 is to	130	x	0.56	0	0	{'x': 0.56, 'what': 0.14, '': 0.1, 'y': 0.09, 'X': 0.04}	2714	4.5402e-08	0.5625	0.972955	original		0.03	FALSE	FALSE	FALSE	out-of-context	{}
Mathematics	math_double	56 is to 112 as 65 is to	130	x	0.56	0	0	{'x': 0.56, 'what': 0.13, '': 0.11, 'y': 0.11, '\\(': 0.02}	1867	8.14907e-08	0.558594	0.981395	original		0.03	FALSE	FALSE	FALSE	out-of-context	{}
Mathematics	math_double	72 is to 144 as 84 is to	168	x	0.56	0	0	{'x': 0.56, 'what': 0.15, 'y': 0.15, '': 0.06, '\\(': 0.02}	9001	4.45289e-09	0.558594	0.910306	original		0.03	FALSE	FALSE	FALSE	out-of-context	{}
Mathematics	math_double	72 is to 144 as 74 is to	148	x	0.56	0	0	{'x': 0.56, 'what': 0.16, 'y': 0.12, '': 0.08, '\\(': 0.02}	7112	9.54606e-09	0.5625	0.929129	original		0.03	FALSE	FALSE	FALSE	out-of-context	{}
Mathematics	math_division2	36 is to 18 as 32 is to	16	x	0.56	0	0	{'x': 0.56, 'y': 0.18, 'what': 0.12, '': 0.06, 'X': 0.02}	524	3.66941e-07	0.5625	0.994778	original		0.03	FALSE	FALSE	FALSE	out-of-context	{}
Mathematics	math_division2	48 is to 24 as 32 is to	16	x	0.56	0	0	{'x': 0.56, 'y': 0.15, 'what': 0.15, '': 0.05, 'X': 0.03}	507	4.65661e-07	0.5625	0.994948	original		0.03	FALSE	FALSE	FALSE	out-of-context	{}
Mathematics	math_division2	2 is to 1 as 64 is to	32	x	0.56	0	0	{'x': 0.56, '': 0.18, 'X': 0.07, 'y': 0.06, 'what': 0.05}	1892	3.20375e-07	0.558593	0.981146	original		0.03	FALSE	FALSE	FALSE	out-of-context	{}
Mathematics	math_division2	76 is to 38 as 80 is to	40	x	0.56	0	0	{'x': 0.56, 'y': 0.24, 'what': 0.09, '': 0.03, '\\(': 0.02}	1681	6.75209e-08	0.5625	0.983249	original		0.03	FALSE	FALSE	FALSE	out-of-context	{}
Mathematics	math_double	38 is to 76 as 16 is to	32	x	0.55	0	0	{'x': 0.55, 'what': 0.14, '': 0.12, 'y': 0.09, 'X': 0.04}	1811	1.06171e-07	0.554687	0.981954	original		0.03	FALSE	FALSE	FALSE	out-of-context	{}
Mathematics	math_double	40 is to 80 as 98 is to	196	x	0.55	0	0	{'x': 0.55, 'y': 0.13, '': 0.12, 'what': 0.1, 'X': 0.04}	9752	4.83124e-09	0.550781	0.902822	original		0.03	FALSE	FALSE	FALSE	out-of-context	{}
Mathematics	math_double	40 is to 80 as 28 is to	56	x	0.55	0	0	{'x': 0.55, 'y': 0.14, '': 0.12, 'what': 0.1, 'X': 0.04}	2649	3.91155e-08	0.550781	0.973603	original		0.03	FALSE	FALSE	FALSE	out-of-context	{}
Mathematics	math_double	48 is to 96 as 8 is to	16	x	0.55	0	0	{'x': 0.55, 'what': 0.18, '': 0.14, 'y': 0.05, 'the': 0.01}	145	9.17912e-06	0.546866	0.998555	original		0.03	FALSE	FALSE	FALSE	out-of-context	{}
Mathematics	math_double	14 is to 28 as 65 is to	130	x	0.55	0	0	{'x': 0.55, 'what': 0.1, 'y': 0.1, 'X': 0.09, '': 0.08}	5662	1.5134e-08	0.554687	0.943579	original		0.03	FALSE	FALSE	FALSE	out-of-context	{}
Mathematics	math_double	12 is to 24 as 74 is to	148	x	0.55	0	0	{'x': 0.55, 'what': 0.15, '': 0.14, 'y': 0.06, 'X': 0.05}	10704	5.12227e-09	0.546875	0.893335	original		0.03	FALSE	FALSE	FALSE	out-of-context	{}
Mathematics	math_double	12 is to 24 as 8 is to	16	x	0.55	0	0	{'x': 0.55, 'what': 0.29, 'y': 0.08, '': 0.05, '\\(': 0.01}	184	2.01166e-06	0.546873	0.998166	original		0.03	FALSE	FALSE	FALSE	out-of-context	{}
Mathematics	math_double	8 is to 16 as 84 is to	168	x	0.55	0	0	{'x': 0.55, 'what': 0.14, 'y': 0.12, '': 0.07, 'X': 0.05}	16347	3.66708e-09	0.550781	0.837103	original		0.03	FALSE	FALSE	FALSE	out-of-context	{}
Mathematics	math_double	26 is to 52 as 65 is to	130	x	0.55	0	0	{'x': 0.55, 'y': 0.12, 'what': 0.1, 'X': 0.08, '': 0.07}	3070	6.23986e-08	0.546875	0.969408	original		0.03	FALSE	FALSE	FALSE	out-of-context	{}
Mathematics	math_double	26 is to 52 as 98 is to	196	x	0.55	0	0	{'x': 0.55, 'what': 0.15, 'y': 0.11, 'X': 0.07, '': 0.06}	7145	1.27475e-08	0.550781	0.928801	original		0.03	FALSE	FALSE	FALSE	out-of-context	{}
Mathematics	math_double	20 is to 40 as 74 is to	148	x	0.55	0	0	{'x': 0.55, '': 0.16, 'what': 0.1, 'y': 0.09, 'X': 0.05}	9263	4.65661e-09	0.550781	0.907695	original		0.03	FALSE	FALSE	FALSE	out-of-context	{}
Mathematics	math_double	22 is to 44 as 65 is to	130	x	0.55	0	0	{'x': 0.55, 'y': 0.11, '': 0.1, 'what': 0.09, 'X': 0.06}	5514	2.45636e-08	0.550781	0.945053	original		0.03	FALSE	FALSE	FALSE	out-of-context	{}
Mathematics	math_double	86 is to 172 as 65 is to	130	x	0.55	0	0	{'x': 0.55, '': 0.13, 'what': 0.13, 'y': 0.1, 'X': 0.02}	1328	1.68569e-07	0.546875	0.986767	original		0.03	FALSE	FALSE	FALSE	out-of-context	{}
Mathematics	math_double	96 is to 192 as 65 is to	130	x	0.55	0	0	{'x': 0.55, '': 0.13, 'what': 0.12, 'y': 0.08, 'X': 0.03}	2536	5.40167e-08	0.550781	0.974729	original		0.03	FALSE	FALSE	FALSE	out-of-context	{}
Mathematics	math_double	72 is to 144 as 98 is to	196	x	0.55	0	0	{'x': 0.55, 'what': 0.14, '': 0.12, 'y': 0.11, 'X': 0.03}	9532	4.07454e-09	0.554687	0.905014	original		0.03	FALSE	FALSE	FALSE	out-of-context	{}
Mathematics	math_division2	42 is to 21 as 94 is to	47	x	0.55	0	0	{'x': 0.55, 'y': 0.16, 'what': 0.11, '': 0.1, '\\(': 0.03}	2682	3.53903e-08	0.546875	0.973274	original		0.03	FALSE	FALSE	FALSE	out-of-context	{}
Mathematics	math_division2	2 is to 1 as 32 is to	16	x	0.55	0	0	{'x': 0.55, '': 0.18, 'X': 0.07, 'what': 0.06, 'y': 0.05}	206	9.17912e-06	0.550772	0.997947	original		0.03	FALSE	FALSE	FALSE	out-of-context	{}
Mathematics	math_division2	22 is to 11 as 62 is to	31	x	0.55	0	0	{'x': 0.55, 'y': 0.14, 'what': 0.13, '': 0.08, 'X': 0.03}	6439	1.96742e-08	0.546875	0.935836	original		0.03	FALSE	FALSE	FALSE	out-of-context	{}
Mathematics	math_division2	22 is to 11 as 46 is to	23	x	0.55	0	0	{'x': 0.55, 'y': 0.14, 'what': 0.13, '': 0.08, 'X': 0.03}	2243	8.19564e-08	0.550781	0.977649	original		0.03	FALSE	FALSE	FALSE	out-of-context	{}
Mathematics	math_division5	55 is to 11 as 80 is to	16	x	0.55	0	0	{'x': 0.55, 'y': 0.2, 'what': 0.11, '': 0.05, '\\(': 0.04}	406	6.81728e-07	0.554687	0.995954	original		0.03	FALSE	FALSE	FALSE	out-of-context	{}
Mathematics	math_division2	96 is to 48 as 62 is to	31	x	0.55	0	0	{'x': 0.55, 'y': 0.13, 'what': 0.12, '': 0.11, 'X': 0.03}	8005	9.0804e-09	0.550781	0.920231	original		0.03	FALSE	FALSE	FALSE	out-of-context	{}
Mathematics	math_division2	96 is to 48 as 28 is to	14	x	0.55	0	0	{'x': 0.55, 'y': 0.14, 'what': 0.12, '': 0.09, '\\(': 0.03}	1649	1.14553e-07	0.550781	0.983568	original		0.03	FALSE	FALSE	FALSE	out-of-context	{}
Mathematics	math_division2	96 is to 48 as 94 is to	47	x	0.55	0	0	{'x': 0.55, 'y': 0.14, 'what': 0.13, '': 0.09, '\\(': 0.02}	2173	9.40636e-08	0.546875	0.978346	original		0.03	FALSE	FALSE	FALSE	out-of-context	{}
Mathematics	math_division2	72 is to 36 as 64 is to	32	x	0.55	0	0	{'x': 0.55, 'y': 0.16, 'what': 0.13, '': 0.06, '\\(': 0.03}	5044	2.25846e-08	0.554687	0.949737	original		0.03	FALSE	FALSE	FALSE	out-of-context	{}
Mathematics	math_double	35 is to 70 as 74 is to	148	x	0.54	0	0	{'x': 0.54, 'y': 0.18, 'what': 0.11, '': 0.06, '\\(': 0.04}	9165	5.20959e-09	0.542969	0.908671	original		0.03	FALSE	FALSE	FALSE	out-of-context	{}
Mathematics	math_double	44 is to 88 as 8 is to	16	x	0.54	0	0	{'x': 0.54, '': 0.19, 'what': 0.13, 'y': 0.07, '\\(': 0.01}	121	1.54972e-05	0.535141	0.998794	original		0.03	FALSE	FALSE	FALSE	out-of-context	{}
Mathematics	math_double	14 is to 28 as 98 is to	196	x	0.54	0	0	{'x': 0.54, 'what': 0.16, 'y': 0.09, 'X': 0.08, '': 0.07}	8752	5.41331e-09	0.542969	0.912787	original		0.03	FALSE	FALSE	FALSE	out-of-context	{}
Mathematics	math_double	14 is to 28 as 84 is to	168	x	0.54	0	0	{'x': 0.54, 'what': 0.17, 'y': 0.11, 'X': 0.06, '': 0.06}	9799	4.59841e-09	0.539062	0.902354	original		0.03	FALSE	FALSE	FALSE	out-of-context	{}
Mathematics	math_double	15 is to 30 as 65 is to	130	x	0.54	0	0	{'x': 0.54, 'y': 0.15, 'what': 0.1, '': 0.09, 'X': 0.07}	2134	3.72529e-08	0.542969	0.978735	original		0.03	FALSE	FALSE	FALSE	out-of-context	{}
Mathematics	math_double	15 is to 30 as 84 is to	168	x	0.54	0	0	{'x': 0.54, 'what': 0.15, 'y': 0.13, '': 0.1, 'X': 0.04}	11289	2.50293e-09	0.542969	0.887506	original		0.03	FALSE	FALSE	FALSE	out-of-context	{}
Mathematics	math_double	8 is to 16 as 65 is to	130	x	0.54	0	0	{'x': 0.54, 'what': 0.11, 'y': 0.1, '': 0.1, 'X': 0.07}	6782	1.54832e-08	0.535156	0.932418	original		0.03	FALSE	FALSE	FALSE	out-of-context	{}
Mathematics	math_double	25 is to 50 as 65 is to	130	x	0.54	0	0	{'x': 0.54, 'y': 0.14, '': 0.09, 'what': 0.09, 'X': 0.07}	1542	6.37956e-08	0.535156	0.984634	original		0.03	FALSE	FALSE	FALSE	out-of-context	{}
Mathematics	math_double	20 is to 40 as 98 is to	196	x	0.54	0	0	{'x': 0.54, '': 0.18, 'what': 0.09, 'y': 0.09, 'X': 0.05}	8279	5.50062e-09	0.539062	0.9175	original		0.03	FALSE	FALSE	FALSE	out-of-context	{}
Mathematics	math_double	85 is to 170 as 74 is to	148	x	0.54	0	0	{'x': 0.54, 'what': 0.17, 'y': 0.12, '': 0.1, '\\(': 0.02}	8081	7.04313e-09	0.535156	0.919473	original		0.03	FALSE	FALSE	FALSE	out-of-context	{}
Mathematics	math_double	88 is to 176 as 8 is to	16	x	0.54	0	0	{'x': 0.54, '': 0.21, 'what': 0.14, 'y': 0.03, '?': 0.02}	255	3.45707e-06	0.535153	0.997459	original		0.03	FALSE	FALSE	FALSE	out-of-context	{}
Mathematics	math_double	84 is to 168 as 65 is to	130	x	0.54	0	0	{'x': 0.54, '': 0.17, 'what': 0.11, 'y': 0.07, 'X': 0.05}	2135	6.98492e-08	0.542969	0.978725	original		0.03	FALSE	FALSE	FALSE	out-of-context	{}
Mathematics	math_double	78 is to 156 as 65 is to	130	x	0.54	0	0	{'x': 0.54, 'what': 0.14, '': 0.13, 'y': 0.1, 'X': 0.03}	2412	4.56348e-08	0.539062	0.975965	original		0.03	FALSE	FALSE	FALSE	out-of-context	{}
Mathematics	math_double	80 is to 160 as 98 is to	196	x	0.54	0	0	{'x': 0.54, '': 0.16, 'what': 0.12, 'y': 0.09, 'X': 0.04}	7083	6.8394e-09	0.539062	0.929418	original		0.03	FALSE	FALSE	FALSE	out-of-context	{}
Mathematics	math_double	64 is to 128 as 8 is to	16	x	0.54	0	0	{'x': 0.54, 'what': 0.2, '': 0.11, 'y': 0.04, 'X': 0.02}	144	1.29938e-05	0.542956	0.998565	original		0.03	FALSE	FALSE	FALSE	out-of-context	{}
Mathematics	math_double	58 is to 116 as 65 is to	130	x	0.54	0	0	{'x': 0.54, 'y': 0.17, 'what': 0.11, '': 0.1, 'X': 0.02}	2141	7.45058e-08	0.539062	0.978665	original		0.03	FALSE	FALSE	FALSE	out-of-context	{}
Mathematics	math_double	68 is to 136 as 8 is to	16	x	0.54	0	0	{'x': 0.54, '': 0.21, 'what': 0.15, 'y': 0.02, 'X': 0.02}	146	9.17912e-06	0.54296	0.998545	original		0.03	FALSE	FALSE	FALSE	out-of-context	{}
Mathematics	math_division2	38 is to 19 as 64 is to	32	x	0.54	0	0	{'x': 0.54, 'y': 0.23, 'what': 0.07, 'X': 0.04, '': 0.03}	4683	2.51457e-08	0.542969	0.953334	original		0.03	FALSE	FALSE	FALSE	out-of-context	{}
Mathematics	math_squares	2 is to 4 as 26 is to	676	x	0.54	0	0	{'x': 0.54, 'y': 0.12, '': 0.1, 'what': 0.09, 'X': 0.08}	28315	1.19326e-09	0.535156	0.717843	original		0.03	FALSE	FALSE	FALSE	out-of-context	{}
Mathematics	math_division2	22 is to 11 as 28 is to	14	x	0.54	0	0	{'x': 0.54, 'y': 0.21, 'what': 0.1, '': 0.04, '\\(': 0.03}	917	3.22238e-07	0.535156	0.990862	original		0.03	FALSE	FALSE	FALSE	out-of-context	{}
Mathematics	math_double	4 is to 8 as 65 is to	130	x	0.54	0	0	{'x': 0.54, 'y': 0.12, 'what': 0.1, '': 0.1, 'X': 0.06}	6159	2.39816e-08	0.535156	0.938626	original		0.03	FALSE	FALSE	FALSE	out-of-context	{}
Mathematics	math_division2	72 is to 36 as 62 is to	31	x	0.54	0	0	{'x': 0.54, 'y': 0.14, 'what': 0.13, '': 0.1, '\\(': 0.03}	7730	1.0361e-08	0.539062	0.922971	original		0.03	FALSE	FALSE	FALSE	out-of-context	{}
Mathematics	math_division2	88 is to 44 as 80 is to	40	x	0.54	0	0	{'x': 0.54, 'y': 0.17, 'what': 0.13, '': 0.05, '\\(': 0.04}	1687	1.47149e-07	0.535156	0.983189	original		0.03	FALSE	FALSE	FALSE	out-of-context	{}
Mathematics	math_division2	78 is to 39 as 94 is to	47	x	0.54	0	0	{'x': 0.54, 'y': 0.2, 'what': 0.11, '': 0.07, 'X': 0.03}	2026	4.98258e-08	0.542969	0.979811	original		0.03	FALSE	FALSE	FALSE	out-of-context	{}
Mathematics	math_double	32 is to 64 as 8 is to	16	x	0.53	0	0	{'x': 0.53, 'what': 0.24, '': 0.09, 'y': 0.05, 'X': 0.02}	183	7.80821e-06	0.531242	0.998176	original		0.03	FALSE	FALSE	FALSE	out-of-context	{}
Mathematics	math_double	45 is to 90 as 65 is to	130	x	0.53	0	0	{'x': 0.53, 'y': 0.13, 'what': 0.11, '': 0.11, '\\(': 0.04}	1375	8.6613e-08	0.53125	0.986298	original		0.03	FALSE	FALSE	FALSE	out-of-context	{}
Mathematics	math_double	15 is to 30 as 74 is to	148	x	0.53	0	0	{'x': 0.53, 'what': 0.14, '': 0.14, 'y': 0.1, 'X': 0.05}	9261	4.04543e-09	0.527344	0.907715	original		0.03	FALSE	FALSE	FALSE	out-of-context	{}
Mathematics	math_double	20 is to 40 as 28 is to	56	x	0.53	0	0	{'x': 0.53, 'y': 0.17, '': 0.1, 'what': 0.09, 'X': 0.04}	1718	5.00586e-08	0.53125	0.98288	original		0.03	FALSE	FALSE	FALSE	out-of-context	{}
Mathematics	math_double	18 is to 36 as 65 is to	130	x	0.53	0	0	{'x': 0.53, 'what': 0.13, 'y': 0.12, '': 0.09, 'X': 0.06}	4540	2.1304e-08	0.53125	0.954759	original		0.03	FALSE	FALSE	FALSE	out-of-context	{}
Mathematics	math_double	24 is to 48 as 16 is to	32	x	0.53	0	0	{'x': 0.53, 'what': 0.16, 'y': 0.13, '': 0.09, 'X': 0.03}	2383	4.65661e-08	0.53125	0.976254	original		0.03	FALSE	FALSE	FALSE	out-of-context	{}
Mathematics	math_division2	34 is to 17 as 32 is to	16	x	0.53	0	0	{'x': 0.53, 'y': 0.22, '': 0.06, 'what': 0.06, '\\(': 0.04}	303	1.78069e-06	0.531248	0.996981	original		0.03	FALSE	FALSE	FALSE	out-of-context	{}
Mathematics	math_squares	25 is to 625 as 4 is to	16	x	0.53	0	0	{'x': 0.53, '': 0.21, 'what': 0.11, 'X': 0.04, 'y': 0.03}	416	9.61125e-07	0.531249	0.995855	original		0.03	FALSE	FALSE	FALSE	out-of-context	{}
Mathematics	math_squares	8 is to 64 as 4 is to	16	x	0.53	0	0	{'x': 0.53, 'what': 0.21, '': 0.08, 'y': 0.07, 'X': 0.04}	365	1.51992e-06	0.531248	0.996363	original		0.03	FALSE	FALSE	FALSE	out-of-context	{}
Mathematics	math_squares	18 is to 324 as 4 is to	16	x	0.53	0	0	{'x': 0.53, 'what': 0.17, '': 0.16, 'y': 0.05, 'X': 0.03}	467	1.08778e-06	0.527343	0.995346	original		0.03	FALSE	FALSE	FALSE	out-of-context	{}
Mathematics	math_division2	16 is to 8 as 32 is to	16	x	0.53	0	0	{'x': 0.53, 'y': 0.25, 'what': 0.11, '': 0.05, 'X': 0.02}	223	1.81794e-06	0.527342	0.997778	original		0.03	FALSE	FALSE	FALSE	out-of-context	{}
Mathematics	math_division2	16 is to 8 as 28 is to	14	x	0.53	0	0	{'x': 0.53, 'y': 0.24, 'what': 0.12, '': 0.05, 'X': 0.02}	685	2.35625e-07	0.527344	0.993174	original		0.03	FALSE	FALSE	FALSE	out-of-context	{}
Mathematics	math_division2	60 is to 30 as 64 is to	32	x	0.53	0	0	{'x': 0.53, 'y': 0.24, 'what': 0.08, '': 0.05, 'X': 0.03}	3613	1.96742e-08	0.53125	0.963997	original		0.03	FALSE	FALSE	FALSE	out-of-context	{}
Mathematics	math_division2	76 is to 38 as 94 is to	47	x	0.53	0	0	{'x': 0.53, 'y': 0.25, 'what': 0.09, '': 0.05, '\\(': 0.02}	1800	5.12227e-08	0.53125	0.982063	original		0.03	FALSE	FALSE	FALSE	out-of-context	{}
Mathematics	math_division2	82 is to 41 as 28 is to	14	x	0.53	0	0	{'x': 0.53, 'y': 0.19, 'what': 0.12, '': 0.06, '\\(': 0.03}	906	2.55182e-07	0.527343	0.990972	original		0.03	FALSE	FALSE	FALSE	out-of-context	{}
Mathematics	math_double	52 is to 104 as 74 is to	148	x	0.52	0	0	{'x': 0.52, 'what': 0.22, 'y': 0.08, '': 0.08, 'X': 0.04}	6143	1.68802e-08	0.515625	0.938785	original		0.03	FALSE	FALSE	FALSE	out-of-context	{}
Mathematics	math_double	45 is to 90 as 98 is to	196	x	0.52	0	0	{'x': 0.52, 'what': 0.14, 'y': 0.14, '': 0.1, '\\(': 0.04}	11488	3.47791e-09	0.515625	0.885523	original		0.03	FALSE	FALSE	FALSE	out-of-context	{}
Mathematics	math_double	54 is to 108 as 65 is to	130	x	0.52	0	0	{'x': 0.52, 'y': 0.14, 'what': 0.13, '': 0.11, 'X': 0.03}	2364	5.75092e-08	0.519531	0.976443	original		0.03	FALSE	FALSE	FALSE	out-of-context	{}
Mathematics	math_double	82 is to 164 as 8 is to	16	x	0.52	0	0	{'x': 0.52, 'what': 0.19, '': 0.18, 'X': 0.02, 'y': 0.02}	250	3.75509e-06	0.515621	0.997509	original		0.03	FALSE	FALSE	FALSE	out-of-context	{}
Mathematics	math_division2	52 is to 26 as 64 is to	32	x	0.52	0	0	{'x': 0.52, 'y': 0.22, 'what': 0.1, 'X': 0.03, '': 0.03}	3866	2.82889e-08	0.523437	0.961476	original		0.03	FALSE	FALSE	FALSE	out-of-context	{}
Mathematics	math_division2	54 is to 27 as 94 is to	47	x	0.52	0	0	{'x': 0.52, 'y': 0.18, 'what': 0.1, '': 0.1, 'X': 0.03}	2102	5.51809e-08	0.523437	0.979054	original		0.03	FALSE	FALSE	FALSE	out-of-context	{}
Mathematics	math_division2	42 is to 21 as 64 is to	32	x	0.52	0	0	{'x': 0.52, 'y': 0.24, 'what': 0.1, '\\(': 0.04, '': 0.04}	4305	1.88593e-08	0.519531	0.957101	original		0.03	FALSE	FALSE	FALSE	out-of-context	{}
Mathematics	math_division2	46 is to 23 as 94 is to	47	x	0.52	0	0	{'x': 0.52, 'y': 0.19, 'what': 0.13, '': 0.06, 'X': 0.03}	1861	5.42495e-08	0.515625	0.981455	original		0.03	FALSE	FALSE	FALSE	out-of-context	{}
Mathematics	math_division2	2 is to 1 as 94 is to	47	x	0.52	0	0	{'x': 0.52, '': 0.23, 'X': 0.06, 'y': 0.06, 'what': 0.05}	2347	2.58908e-07	0.515625	0.976612	original		0.03	FALSE	FALSE	FALSE	out-of-context	{}
Mathematics	math_squares	6 is to 36 as 26 is to	676	x	0.52	0	0	{'x': 0.52, 'y': 0.17, 'what': 0.13, '': 0.06, 'X': 0.05}	27477	1.28057e-09	0.523437	0.726194	original		0.03	FALSE	FALSE	FALSE	out-of-context	{}
Mathematics	math_squares	5 is to 25 as 4 is to	16	x	0.52	0	0	{'x': 0.52, 'what': 0.2, '': 0.12, 'y': 0.06, 'X': 0.04}	316	1.49757e-06	0.515624	0.996851	original		0.03	FALSE	FALSE	FALSE	out-of-context	{}
Mathematics	math_double	4 is to 8 as 8 is to	16		0.52	0	0	{'': 0.52, 'x': 0.19, 'what': 0.1, 'y': 0.03, 'X': 0.03}	121	4.95911e-05	0.515575	0.998794	original		0.03	FALSE	FALSE	FALSE	out-of-context	{}
Mathematics	math_division2	66 is to 33 as 94 is to	47	x	0.52	0	0	{'x': 0.52, 'y': 0.17, 'what': 0.15, '': 0.08, 'X': 0.03}	2649	5.33182e-08	0.515625	0.973603	original		0.03	FALSE	FALSE	FALSE	out-of-context	{}
Mathematics	math_division2	74 is to 37 as 28 is to	14	x	0.52	0	0	{'x': 0.52, 'y': 0.17, 'what': 0.13, '': 0.06, '\\(': 0.03}	1014	1.88127e-07	0.519531	0.989896	original		0.03	FALSE	FALSE	FALSE	out-of-context	{}
Mathematics	math_division2	72 is to 36 as 32 is to	16	x	0.52	0	0	{'x': 0.52, 'y': 0.18, 'what': 0.12, '': 0.08, '\\(': 0.03}	595	4.76837e-07	0.523437	0.994071	original		0.03	FALSE	FALSE	FALSE	out-of-context	{}
Mathematics	math_division2	88 is to 44 as 28 is to	14	x	0.52	0	0	{'x': 0.52, 'y': 0.15, 'what': 0.13, '': 0.09, '\\(': 0.03}	1053	3.35276e-07	0.519531	0.989507	original		0.03	FALSE	FALSE	FALSE	out-of-context	{}
Mathematics	math_double	45 is to 90 as 74 is to	148	x	0.51	0	0	{'x': 0.51, 'what': 0.2, 'y': 0.12, '': 0.08, '\\(': 0.04}	9465	4.16185e-09	0.507812	0.905682	original		0.03	FALSE	FALSE	FALSE	out-of-context	{}
Mathematics	math_double	14 is to 28 as 74 is to	148	x	0.51	0	0	{'x': 0.51, 'what': 0.19, 'y': 0.08, '': 0.07, 'X': 0.07}	8992	7.18865e-09	0.511719	0.910395	original		0.03	FALSE	FALSE	FALSE	out-of-context	{}
Mathematics	math_double	6 is to 12 as 16 is to	32	x	0.51	0	0	{'x': 0.51, 'y': 0.26, 'what': 0.08, '': 0.05, 'X': 0.03}	4928	1.93249e-08	0.511719	0.950893	original		0.03	FALSE	FALSE	FALSE	out-of-context	{}
Mathematics	math_double	10 is to 20 as 65 is to	130	x	0.51	0	0	{'x': 0.51, '': 0.13, 'what': 0.11, 'y': 0.1, 'X': 0.08}	2807	3.44589e-08	0.511719	0.972028	original		0.03	FALSE	FALSE	FALSE	out-of-context	{}
Mathematics	math_double	12 is to 24 as 16 is to	32	x	0.51	0	0	{'x': 0.51, 'what': 0.17, 'y': 0.16, '': 0.08, 'X': 0.03}	1722	5.09899e-08	0.511719	0.98284	original		0.03	FALSE	FALSE	FALSE	out-of-context	{}
Mathematics	math_double	22 is to 44 as 74 is to	148	x	0.51	0	0	{'x': 0.51, 'what': 0.16, 'y': 0.1, '': 0.1, 'X': 0.05}	8594	1.3446e-08	0.511719	0.914361	original		0.03	FALSE	FALSE	FALSE	out-of-context	{}
Mathematics	math_double	24 is to 48 as 28 is to	56	x	0.51	0	0	{'x': 0.51, 'what': 0.17, 'y': 0.15, '': 0.07, 'X': 0.03}	2056	6.0536e-08	0.511719	0.979512	original		0.03	FALSE	FALSE	FALSE	out-of-context	{}
Mathematics	math_double	55 is to 110 as 84 is to	168	x	0.51	0	0	{'x': 0.51, 'y': 0.21, 'what': 0.17, '': 0.05, '\\(': 0.03}	11497	2.92493e-09	0.507812	0.885433	original		0.03	FALSE	FALSE	FALSE	out-of-context	{}
Mathematics	math_division2	48 is to 24 as 28 is to	14	x	0.51	0	0	{'x': 0.51, 'what': 0.17, 'y': 0.14, '': 0.08, 'X': 0.03}	1357	1.4808e-07	0.507812	0.986478	original		0.03	FALSE	FALSE	FALSE	out-of-context	{}
Mathematics	math_double	5 is to 10 as 8 is to	16	x	0.51	0	0	{'x': 0.51, 'y': 0.21, 'what': 0.15, '': 0.06, 'X': 0.02}	274	1.40071e-06	0.511717	0.99727	original		0.03	FALSE	FALSE	FALSE	out-of-context	{}
Mathematics	math_division2	74 is to 37 as 94 is to	47	x	0.51	0	0	{'x': 0.51, 'y': 0.2, 'what': 0.12, '': 0.06, 'X': 0.03}	1468	8.6613e-08	0.507812	0.985371	original		0.03	FALSE	FALSE	FALSE	out-of-context	{}
Mathematics	math_double	36 is to 72 as 74 is to	148	x	0.5	0	0	{'x': 0.5, 'y': 0.15, 'what': 0.14, '': 0.09, '\\(': 0.03}	9830	7.01402e-09	0.5	0.902045	original		0.03	FALSE	FALSE	FALSE	out-of-context	{}
Mathematics	math_double	42 is to 84 as 65 is to	130	x	0.5	0	0	{'x': 0.5, 'what': 0.14, 'y': 0.12, '': 0.11, 'X': 0.04}	3779	3.05008e-08	0.496094	0.962343	original		0.03	FALSE	FALSE	FALSE	out-of-context	{}
Mathematics	math_double	25 is to 50 as 74 is to	148	x	0.5	0	0	{'x': 0.5, 'what': 0.15, '': 0.12, 'y': 0.1, 'X': 0.06}	6314	9.25502e-09	0.503906	0.937081	original		0.03	FALSE	FALSE	FALSE	out-of-context	{}
Mathematics	math_double	64 is to 128 as 28 is to	56	x	0.5	0	0	{'x': 0.5, 'what': 0.17, 'y': 0.1, '': 0.07, 'X': 0.05}	3058	6.47269e-08	0.5	0.969527	original		0.03	FALSE	FALSE	FALSE	out-of-context	{}
Mathematics	math_double	56 is to 112 as 28 is to	56	x	0.5	0	0	{'x': 0.5, 'what': 0.23, 'y': 0.1, '': 0.09, 'X': 0.02}	1008	1.32248e-07	0.5	0.989955	original		0.03	FALSE	FALSE	FALSE	out-of-context	{}
Mathematics	math_double	74 is to 148 as 65 is to	130	x	0.5	0	0	{'x': 0.5, 'what': 0.18, 'y': 0.12, '': 0.1, 'X': 0.03}	2551	5.16884e-08	0.503906	0.974579	original		0.03	FALSE	FALSE	FALSE	out-of-context	{}
Mathematics	math_division2	32 is to 16 as 62 is to	31	x	0.5	0	0	{'x': 0.5, 'what': 0.15, '': 0.13, 'y': 0.09, 'X': 0.05}	4140	3.91155e-08	0.503906	0.958745	original		0.03	FALSE	FALSE	FALSE	out-of-context	{}
Mathematics	math_division2	52 is to 26 as 32 is to	16	x	0.5	0	0	{'x': 0.5, 'y': 0.19, 'what': 0.14, '': 0.05, 'X': 0.03}	319	1.27405e-06	0.498046	0.996821	original		0.03	FALSE	FALSE	FALSE	out-of-context	{}
Mathematics	math_division2	18 is to 9 as 32 is to	16	x	0.5	0	0	{'x': 0.5, 'y': 0.25, 'what': 0.13, '': 0.04, 'X': 0.02}	321	7.6741e-07	0.503905	0.996801	original		0.03	FALSE	FALSE	FALSE	out-of-context	{}
Mathematics	math_double	2 is to 4 as 65 is to	130	x	0.5	0	0	{'x': 0.5, '': 0.14, 'X': 0.1, 'y': 0.09, 'what': 0.08}	5907	2.79397e-08	0.5	0.941137	original		0.03	FALSE	FALSE	FALSE	out-of-context	{}
Mathematics	math_division2	84 is to 42 as 64 is to	32	x	0.5	0	0	{'x': 0.5, 'y': 0.21, 'what': 0.14, '': 0.04, '\\(': 0.03}	4980	1.95578e-08	0.5	0.950375	original		0.03	FALSE	FALSE	FALSE	out-of-context	{}
Mathematics	math_division2	88 is to 44 as 94 is to	47	x	0.5	0	0	{'x': 0.5, 'y': 0.19, 'what': 0.14, '': 0.07, '\\(': 0.03}	2082	9.68575e-08	0.503906	0.979253	original		0.03	FALSE	FALSE	FALSE	out-of-context	{}
Mathematics	math_division2	78 is to 39 as 62 is to	31	x	0.5	0	0	{'x': 0.5, 'y': 0.16, 'what': 0.14, '': 0.1, 'X': 0.03}	5799	1.53668e-08	0.503906	0.942213	original		0.03	FALSE	FALSE	FALSE	out-of-context	{}
Mathematics	math_double	54 is to 108 as 16 is to	32	x	0.49	0	0	{'x': 0.49, 'what': 0.15, '': 0.15, 'y': 0.12, 'X': 0.04}	2772	5.02914e-08	0.490234	0.972377	original		0.03	FALSE	FALSE	FALSE	out-of-context	{}
Mathematics	math_double	15 is to 30 as 8 is to	16	x	0.49	0	0	{'x': 0.49, 'what': 0.3, '': 0.09, 'y': 0.08, 'X': 0.01}	257	7.41333e-07	0.490234	0.997439	original		0.03	FALSE	FALSE	FALSE	out-of-context	{}
Mathematics	math_double	8 is to 16 as 74 is to	148	x	0.49	0	0	{'x': 0.49, 'what': 0.17, '': 0.12, 'y': 0.08, 'X': 0.07}	14927	5.67525e-09	0.492187	0.851254	original		0.03	FALSE	FALSE	FALSE	out-of-context	{}
Mathematics	math_double	24 is to 48 as 74 is to	148	x	0.49	0	0	{'x': 0.49, 'what': 0.17, '': 0.12, 'y': 0.09, 'X': 0.05}	7805	1.10595e-08	0.494141	0.922224	original		0.03	FALSE	FALSE	FALSE	out-of-context	{}
Mathematics	math_double	18 is to 36 as 20 is to	40	x	0.49	0	0	{'x': 0.49, 'y': 0.21, 'what': 0.16, '': 0.05, 'X': 0.03}	862	1.50874e-07	0.49414	0.99141	original		0.03	FALSE	FALSE	FALSE	out-of-context	{}
Mathematics	math_double	88 is to 176 as 65 is to	130	x	0.49	0	0	{'x': 0.49, 'what': 0.17, '': 0.15, 'y': 0.11, 'X': 0.02}	1895	9.91859e-08	0.490234	0.981116	original		0.03	FALSE	FALSE	FALSE	out-of-context	{}
Mathematics	math_double	62 is to 124 as 65 is to	130	x	0.49	0	0	{'x': 0.49, 'y': 0.18, 'what': 0.16, '': 0.07, 'X': 0.02}	1779	1.15018e-07	0.486328	0.982272	original		0.03	FALSE	FALSE	FALSE	out-of-context	{}
Mathematics	math_double	56 is to 112 as 16 is to	32	x	0.49	0	0	{'x': 0.49, 'what': 0.16, '': 0.16, 'y': 0.09, 'X': 0.03}	2056	8.28877e-08	0.492187	0.979512	original		0.03	FALSE	FALSE	FALSE	out-of-context	{}
Mathematics	math_double	58 is to 116 as 74 is to	148	x	0.49	0	0	{'x': 0.49, 'what': 0.21, 'y': 0.16, '': 0.09, 'Y': 0.01}	8616	6.49015e-09	0.486328	0.914142	original		0.03	FALSE	FALSE	FALSE	out-of-context	{}
Mathematics	math_double	5 is to 10 as 74 is to	148	x	0.49	0	0	{'x': 0.49, 'what': 0.17, '': 0.13, 'y': 0.1, 'X': 0.05}	15302	3.55067e-09	0.486328	0.847517	original		0.03	FALSE	FALSE	FALSE	out-of-context	{}
Mathematics	math_division2	38 is to 19 as 32 is to	16	x	0.49	0	0	{'x': 0.49, 'y': 0.21, 'what': 0.1, '': 0.06, 'X': 0.04}	429	1.06543e-06	0.490233	0.995725	original		0.03	FALSE	FALSE	FALSE	out-of-context	{}
Mathematics	math_division2	46 is to 23 as 64 is to	32	x	0.49	0	0	{'x': 0.49, 'y': 0.28, 'what': 0.08, '': 0.04, '\\(': 0.04}	4335	2.18861e-08	0.490234	0.956802	original		0.03	FALSE	FALSE	FALSE	out-of-context	{}
Mathematics	math_division5	55 is to 11 as 70 is to	14	x	0.49	0	0	{'x': 0.49, 'y': 0.19, 'what': 0.14, '': 0.08, '\\(': 0.04}	687	4.45172e-07	0.488281	0.993154	original		0.03	FALSE	FALSE	FALSE	out-of-context	{}
Mathematics	math_division2	94 is to 47 as 64 is to	32	x	0.49	0	0	{'x': 0.49, 'y': 0.21, 'what': 0.11, '': 0.07, '\\(': 0.03}	5044	2.468e-08	0.486328	0.949737	original		0.03	FALSE	FALSE	FALSE	out-of-context	{}
Mathematics	math_division2	84 is to 42 as 28 is to	14	x	0.49	0	0	{'x': 0.49, 'y': 0.23, 'what': 0.14, '': 0.05, '\\(': 0.03}	1218	1.49943e-07	0.488281	0.987863	original		0.03	FALSE	FALSE	FALSE	out-of-context	{}
Mathematics	math_division2	88 is to 44 as 62 is to	31	x	0.49	0	0	{'x': 0.49, 'y': 0.16, 'what': 0.14, '': 0.12, '\\(': 0.03}	5206	2.59606e-08	0.486328	0.948123	original		0.03	FALSE	FALSE	FALSE	out-of-context	{}
Mathematics	math_double	18 is to 36 as 8 is to	16	x	0.48	0	0	{'x': 0.48, 'what': 0.32, 'y': 0.09, '': 0.06, 'X': 0.01}	178	2.42889e-06	0.478513	0.998226	original		0.03	FALSE	FALSE	FALSE	out-of-context	{}
Mathematics	math_double	82 is to 164 as 28 is to	56	x	0.48	0	0	{'x': 0.48, 'what': 0.26, '': 0.11, 'y': 0.07, 'X': 0.03}	1759	1.0943e-07	0.480469	0.982472	original		0.03	FALSE	FALSE	FALSE	out-of-context	{}
Mathematics	math_double	94 is to 188 as 65 is to	130	x	0.48	0	0	{'x': 0.48, 'what': 0.17, '': 0.15, 'y': 0.11, 'X': 0.03}	2444	6.65896e-08	0.480469	0.975646	original		0.03	FALSE	FALSE	FALSE	out-of-context	{}
Mathematics	math_double	76 is to 152 as 65 is to	130	x	0.48	0	0	{'x': 0.48, 'what': 0.21, 'y': 0.12, '': 0.1, 'X': 0.02}	1958	8.5216e-08	0.476562	0.980489	original		0.03	FALSE	FALSE	FALSE	out-of-context	{}
Mathematics	math_double	68 is to 136 as 74 is to	148	x	0.48	0	0	{'x': 0.48, 'what': 0.21, 'y': 0.13, '': 0.1, 'X': 0.02}	7423	1.07102e-08	0.478516	0.92603	original		0.03	FALSE	FALSE	FALSE	out-of-context	{}
Mathematics	math_division2	32 is to 16 as 28 is to	14	x	0.48	0	0	{'x': 0.48, 'what': 0.22, 'y': 0.12, '': 0.06, 'X': 0.04}	1019	2.92435e-07	0.482422	0.989846	original		0.03	FALSE	FALSE	FALSE	out-of-context	{}
Mathematics	math_division2	56 is to 28 as 32 is to	16	x	0.48	0	0	{'x': 0.48, 'y': 0.2, 'what': 0.16, '': 0.08, '\\(': 0.02}	402	6.33299e-07	0.476562	0.995994	original		0.03	FALSE	FALSE	FALSE	out-of-context	{}
Mathematics	math_division2	42 is to 21 as 28 is to	14	x	0.48	0	0	{'x': 0.48, 'y': 0.21, 'what': 0.15, '': 0.05, '\\(': 0.04}	915	1.96509e-07	0.478515	0.990882	original		0.03	FALSE	FALSE	FALSE	out-of-context	{}
Mathematics	math_division2	46 is to 23 as 32 is to	16	x	0.48	0	0	{'x': 0.48, 'y': 0.24, 'what': 0.11, '': 0.06, '\\(': 0.04}	373	7.33882e-07	0.476562	0.996283	original		0.03	FALSE	FALSE	FALSE	out-of-context	{}
Mathematics	math_division2	94 is to 47 as 62 is to	31	x	0.48	0	0	{'x': 0.48, 'y': 0.18, 'what': 0.12, '': 0.1, 'X': 0.03}	5711	1.75787e-08	0.478516	0.94309	original		0.03	FALSE	FALSE	FALSE	out-of-context	{}
Mathematics	math_division2	92 is to 46 as 94 is to	47	x	0.48	0	0	{'x': 0.48, 'y': 0.21, 'what': 0.15, '': 0.05, 'Y': 0.03}	1810	1.24797e-07	0.480469	0.981963	original		0.03	FALSE	FALSE	FALSE	out-of-context	{}
Mathematics	math_division2	98 is to 49 as 28 is to	14	x	0.48	0	0	{'x': 0.48, 'y': 0.17, 'what': 0.14, '': 0.08, 'X': 0.03}	1314	2.5332e-07	0.480468	0.986906	original		0.03	FALSE	FALSE	FALSE	out-of-context	{}
Mathematics	math_double	2 is to 4 as 74 is to	148	x	0.48	0	0	{'x': 0.48, '': 0.17, 'what': 0.11, 'X': 0.08, 'y': 0.08}	11589	1.0652e-08	0.482422	0.884517	original		0.03	FALSE	FALSE	FALSE	out-of-context	{}
Mathematics	math_division2	68 is to 34 as 94 is to	47	x	0.48	0	0	{'x': 0.48, 'y': 0.19, 'what': 0.14, '': 0.09, 'X': 0.03}	1553	1.02445e-07	0.476562	0.984524	original		0.03	FALSE	FALSE	FALSE	out-of-context	{}
Mathematics	math_division2	88 is to 44 as 32 is to	16	x	0.48	0	0	{'x': 0.48, 'y': 0.19, 'what': 0.12, '': 0.1, '\\(': 0.03}	269	2.23517e-06	0.48242	0.997319	original		0.03	FALSE	FALSE	FALSE	out-of-context	{}
Mathematics	math_double	38 is to 76 as 65 is to	130	x	0.47	0	0	{'x': 0.47, 'y': 0.18, 'what': 0.11, '': 0.09, 'X': 0.04}	4060	3.51574e-08	0.46875	0.959542	original		0.03	FALSE	FALSE	FALSE	out-of-context	{}
Mathematics	math_double	28 is to 56 as 65 is to	130	x	0.47	0	0	{'x': 0.47, 'what': 0.2, 'y': 0.15, '': 0.07, 'X': 0.05}	3046	4.35393e-08	0.474609	0.969647	original		0.03	FALSE	FALSE	FALSE	out-of-context	{}
Mathematics	math_double	96 is to 192 as 98 is to	196	x	0.47	0	0	{'x': 0.47, 'what': 0.24, 'y': 0.14, '': 0.06, '\\(': 0.03}	5387	1.53668e-08	0.470703	0.946319	original		0.03	FALSE	FALSE	FALSE	out-of-context	{}
Mathematics	math_division2	94 is to 47 as 32 is to	16	x	0.47	0	0	{'x': 0.47, 'y': 0.2, 'what': 0.12, '': 0.09, '\\(': 0.03}	490	7.45058e-07	0.474609	0.995117	original		0.03	FALSE	FALSE	FALSE	out-of-context	{}
Mathematics	math_division2	88 is to 44 as 64 is to	32	x	0.47	0	0	{'x': 0.47, 'y': 0.17, 'what': 0.15, '': 0.09, '\\(': 0.03}	3153	6.42613e-08	0.472656	0.968581	original		0.03	FALSE	FALSE	FALSE	out-of-context	{}
Mathematics	math_division2	78 is to 39 as 32 is to	16	x	0.47	0	0	{'x': 0.47, 'y': 0.19, 'what': 0.14, '': 0.1, 'X': 0.02}	465	8.27014e-07	0.470702	0.995366	original		0.03	FALSE	FALSE	FALSE	out-of-context	{}
Mathematics	math_double	46 is to 92 as 16 is to	32	x	0.46	0	0	{'x': 0.46, 'what': 0.22, 'y': 0.13, '': 0.1, '\\(': 0.02}	2114	7.91624e-08	0.458984	0.978934	original		0.03	FALSE	FALSE	FALSE	out-of-context	{}
Mathematics	math_double	16 is to 32 as 8 is to	16	what	0.46	0	0	{'what': 0.46, 'x': 0.3, '': 0.08, 'y': 0.07, 'X': 0.02}	161	6.85453e-06	0.464837	0.998396	original		0.03	FALSE	FALSE	FALSE	out-of-context	{}
Mathematics	math_double	82 is to 164 as 65 is to	130	x	0.46	0	0	{'x': 0.46, 'what': 0.21, '': 0.17, 'y': 0.07, 'X': 0.03}	1926	1.23866e-07	0.460937	0.980808	original		0.03	FALSE	FALSE	FALSE	out-of-context	{}
Mathematics	math_double	96 is to 192 as 84 is to	168	x	0.46	0	0	{'x': 0.46, 'what': 0.24, 'y': 0.12, '': 0.08, '\\(': 0.03}	6940	9.77889e-09	0.457031	0.930843	original		0.03	FALSE	FALSE	FALSE	out-of-context	{}
Mathematics	math_double	55 is to 110 as 74 is to	148	x	0.46	0	0	{'x': 0.46, 'what': 0.21, 'y': 0.19, '': 0.07, '\\(': 0.03}	7468	8.44011e-09	0.457031	0.925582	original		0.03	FALSE	FALSE	FALSE	out-of-context	{}
Mathematics	math_double	54 is to 108 as 84 is to	168	x	0.46	0	0	{'x': 0.46, 'what': 0.21, 'y': 0.16, '': 0.07, 'X': 0.03}	9157	4.51109e-09	0.462891	0.908751	original		0.03	FALSE	FALSE	FALSE	out-of-context	{}
Mathematics	math_double	58 is to 116 as 84 is to	168	x	0.46	0	0	{'x': 0.46, 'y': 0.21, 'what': 0.21, '': 0.06, 'Y': 0.02}	12538	3.25963e-09	0.457031	0.87506	original		0.03	FALSE	FALSE	FALSE	out-of-context	{}
Mathematics	math_double	56 is to 112 as 98 is to	196	x	0.46	0	0	{'x': 0.46, 'what': 0.19, 'y': 0.13, '': 0.12, 'X': 0.03}	7215	9.37143e-09	0.458984	0.928103	original		0.03	FALSE	FALSE	FALSE	out-of-context	{}
Mathematics	math_double	76 is to 152 as 84 is to	168	x	0.46	0	0	{'x': 0.46, 'what': 0.23, 'y': 0.19, '': 0.05, '\\(': 0.02}	9233	5.84987e-09	0.458984	0.907994	original		0.03	FALSE	FALSE	FALSE	out-of-context	{}
Mathematics	math_double	68 is to 136 as 65 is to	130	x	0.46	0	0	{'x': 0.46, 'what': 0.18, '': 0.14, 'y': 0.11, 'X': 0.03}	1888	1.25729e-07	0.464844	0.981186	original		0.03	FALSE	FALSE	FALSE	out-of-context	{}
Mathematics	math_division2	52 is to 26 as 28 is to	14	x	0.46	0	0	{'x': 0.46, 'y': 0.19, 'what': 0.17, '': 0.05, 'X': 0.04}	938	2.49594e-07	0.464844	0.990653	original		0.03	FALSE	FALSE	FALSE	out-of-context	{}
Mathematics	math_division2	52 is to 26 as 62 is to	31	x	0.46	0	0	{'x': 0.46, 'y': 0.17, 'what': 0.15, '': 0.09, 'X': 0.04}	3091	5.6345e-08	0.457031	0.969198	original		0.03	FALSE	FALSE	FALSE	out-of-context	{}
Mathematics	math_division2	56 is to 28 as 62 is to	31	x	0.46	0	0	{'x': 0.46, 'y': 0.19, 'what': 0.14, '': 0.11, 'X': 0.02}	4133	2.45636e-08	0.460937	0.958815	original		0.03	FALSE	FALSE	FALSE	out-of-context	{}
Mathematics	math_division2	54 is to 27 as 32 is to	16	x	0.46	0	0	{'x': 0.46, 'y': 0.2, 'what': 0.14, '': 0.09, '\\(': 0.03}	455	6.66827e-07	0.46289	0.995466	original		0.03	FALSE	FALSE	FALSE	out-of-context	{}
Mathematics	math_division2	42 is to 21 as 32 is to	16	x	0.46	0	0	{'x': 0.46, 'y': 0.22, 'what': 0.13, '': 0.06, '\\(': 0.04}	543	5.73695e-07	0.458984	0.994589	original		0.03	FALSE	FALSE	FALSE	out-of-context	{}
Mathematics	math_division2	44 is to 22 as 64 is to	32	x	0.46	0	0	{'x': 0.46, 'y': 0.23, 'what': 0.15, '': 0.06, '\\(': 0.03}	3941	3.70201e-08	0.457031	0.960728	original		0.03	FALSE	FALSE	FALSE	out-of-context	{}
Mathematics	math_division2	44 is to 22 as 94 is to	47	x	0.46	0	0	{'x': 0.46, 'what': 0.21, 'y': 0.14, '': 0.1, '\\(': 0.03}	2412	6.98492e-08	0.455078	0.975965	original		0.03	FALSE	FALSE	FALSE	out-of-context	{}
Mathematics	math_division2	98 is to 49 as 94 is to	47	x	0.46	0	0	{'x': 0.46, 'y': 0.18, 'what': 0.17, '': 0.07, '\\(': 0.03}	2448	7.91624e-08	0.455078	0.975606	original		0.03	FALSE	FALSE	FALSE	out-of-context	{}
Mathematics	math_division2	98 is to 49 as 64 is to	32	x	0.46	0	0	{'x': 0.46, 'y': 0.19, 'what': 0.13, '': 0.09, 'X': 0.03}	4534	3.70201e-08	0.457031	0.954819	original		0.03	FALSE	FALSE	FALSE	out-of-context	{}
Mathematics	math_division2	74 is to 37 as 64 is to	32	x	0.46	0	0	{'x': 0.46, 'y': 0.2, 'what': 0.14, '': 0.06, 'X': 0.04}	4967	2.5495e-08	0.464844	0.950504	original		0.03	FALSE	FALSE	FALSE	out-of-context	{}
Mathematics	math_division2	74 is to 37 as 62 is to	31	x	0.46	0	0	{'x': 0.46, 'y': 0.17, 'what': 0.15, '': 0.1, 'X': 0.04}	5447	1.81608e-08	0.457031	0.945721	original		0.03	FALSE	FALSE	FALSE	out-of-context	{}
Mathematics	math_division2	74 is to 37 as 32 is to	16	x	0.46	0	0	{'x': 0.46, 'y': 0.17, 'what': 0.15, '': 0.09, 'X': 0.03}	457	7.56234e-07	0.464843	0.995446	original		0.03	FALSE	FALSE	FALSE	out-of-context	{}
Mathematics	math_division2	62 is to 31 as 94 is to	47	x	0.46	0	0	{'x': 0.46, 'y': 0.25, 'what': 0.14, '': 0.06, 'Y': 0.03}	1706	5.84405e-08	0.458984	0.983	original		0.03	FALSE	FALSE	FALSE	out-of-context	{}
Mathematics	math_division2	82 is to 41 as 32 is to	16	x	0.46	0	0	{'x': 0.46, 'y': 0.22, 'what': 0.12, '': 0.09, '\\(': 0.03}	353	1.24425e-06	0.462889	0.996482	original		0.03	FALSE	FALSE	FALSE	out-of-context	{}
Mathematics	math_double	38 is to 76 as 84 is to	168	x	0.45	0	0	{'x': 0.45, 'y': 0.25, 'what': 0.14, '': 0.05, 'X': 0.03}	13999	3.43425e-09	0.451172	0.860501	original		0.03	FALSE	FALSE	FALSE	out-of-context	{}
Mathematics	math_double	28 is to 56 as 98 is to	196	x	0.45	0	0	{'x': 0.45, 'what': 0.23, 'y': 0.11, '': 0.08, 'X': 0.06}	5301	2.04891e-08	0.451172	0.947176	original		0.03	FALSE	FALSE	FALSE	out-of-context	{}
Mathematics	math_double	66 is to 132 as 84 is to	168	x	0.45	0	0	{'x': 0.45, 'what': 0.2, 'y': 0.18, '': 0.08, 'X': 0.02}	9069	5.79166e-09	0.453125	0.909628	original		0.03	FALSE	FALSE	FALSE	out-of-context	{}
Mathematics	math_division2	54 is to 27 as 62 is to	31	x	0.45	0	0	{'x': 0.45, 'y': 0.2, '': 0.11, 'what': 0.11, 'X': 0.04}	4628	2.42144e-08	0.451172	0.953882	original		0.03	FALSE	FALSE	FALSE	out-of-context	{}
Mathematics	math_division2	98 is to 49 as 32 is to	16	x	0.45	0	0	{'x': 0.45, 'y': 0.18, 'what': 0.14, '': 0.1, '\\(': 0.03}	454	1.16974e-06	0.451171	0.995476	original		0.03	FALSE	FALSE	FALSE	out-of-context	{}
Mathematics	math_division2	76 is to 38 as 64 is to	32	x	0.45	0	0	{'x': 0.45, 'y': 0.26, 'what': 0.15, '': 0.05, '\\(': 0.02}	4643	1.96742e-08	0.451172	0.953733	original		0.03	FALSE	FALSE	FALSE	out-of-context	{}
Mathematics	math_double	42 is to 84 as 74 is to	148	x	0.44	0	0	{'x': 0.44, 'what': 0.22, 'y': 0.14, '': 0.09, '\\(': 0.04}	10272	5.58794e-09	0.443359	0.89764	original		0.03	FALSE	FALSE	FALSE	out-of-context	{}
Mathematics	math_double	46 is to 92 as 65 is to	130	x	0.44	0	0	{'x': 0.44, 'what': 0.21, 'y': 0.17, '': 0.08, '\\(': 0.04}	2750	4.72646e-08	0.443359	0.972596	original		0.03	FALSE	FALSE	FALSE	out-of-context	{}
Mathematics	math_double	10 is to 20 as 98 is to	196	x	0.44	0	0	{'x': 0.44, 'what': 0.16, '': 0.16, 'y': 0.1, 'X': 0.06}	11676	4.51109e-09	0.443359	0.88365	original		0.03	FALSE	FALSE	FALSE	out-of-context	{}
Mathematics	math_squares	28 is to 784 as 4 is to	16	x	0.44	0	0	{'x': 0.44, '': 0.2, 'what': 0.14, 'X': 0.06, 'y': 0.03}	272	5.39422e-06	0.441401	0.99729	original		0.03	FALSE	FALSE	FALSE	out-of-context	{}
Mathematics	math_division2	92 is to 46 as 64 is to	32	x	0.44	0	0	{'x': 0.44, 'y': 0.19, 'what': 0.18, '': 0.08, '\\(': 0.03}	4031	3.42261e-08	0.4375	0.959831	original		0.03	FALSE	FALSE	FALSE	out-of-context	{}
Mathematics	math_division2	76 is to 38 as 32 is to	16	x	0.44	0	0	{'x': 0.44, 'y': 0.26, 'what': 0.15, '': 0.06, '\\(': 0.02}	481	5.06639e-07	0.439453	0.995207	original		0.03	FALSE	FALSE	FALSE	out-of-context	{}
Mathematics	math_double	32 is to 64 as 98 is to	196	x	0.43	0	0	{'x': 0.43, 'what': 0.23, '': 0.1, 'y': 0.09, 'X': 0.06}	9148	1.2049e-08	0.431641	0.908841	original		0.03	FALSE	FALSE	FALSE	out-of-context	{}
Mathematics	math_double	48 is to 96 as 98 is to	196	x	0.43	0	0	{'x': 0.43, 'what': 0.22, 'y': 0.14, '': 0.1, 'X': 0.03}	12836	5.38421e-09	0.425781	0.87209	original		0.03	FALSE	FALSE	FALSE	out-of-context	{}
Mathematics	math_double	44 is to 88 as 65 is to	130	x	0.43	0	0	{'x': 0.43, 'y': 0.17, 'what': 0.16, '': 0.12, 'X': 0.03}	3022	5.79748e-08	0.433594	0.969886	original		0.03	FALSE	FALSE	FALSE	out-of-context	{}
Mathematics	math_double	92 is to 184 as 65 is to	130	x	0.43	0	0	{'x': 0.43, 'what': 0.25, '': 0.12, 'y': 0.12, 'X': 0.02}	2118	6.98492e-08	0.431641	0.978894	original		0.03	FALSE	FALSE	FALSE	out-of-context	{}
Mathematics	math_division2	64 is to 32 as 28 is to	14	x	0.43	0	0	{'x': 0.43, 'what': 0.21, 'y': 0.12, '': 0.08, 'X': 0.06}	1278	3.241e-07	0.427734	0.987265	original		0.03	FALSE	FALSE	FALSE	out-of-context	{}
Mathematics	math_double	32 is to 64 as 74 is to	148	x	0.42	0	0	{'x': 0.42, 'what': 0.27, '': 0.09, 'y': 0.08, 'X': 0.06}	10918	1.01863e-08	0.419922	0.891203	original		0.03	FALSE	FALSE	FALSE	out-of-context	{}
Mathematics	math_double	88 is to 176 as 98 is to	196	x	0.42	0	0	{'x': 0.42, 'what': 0.23, 'y': 0.15, '': 0.13, '\\(': 0.01}	4950	2.43308e-08	0.419922	0.950674	original		0.03	FALSE	FALSE	FALSE	out-of-context	{}
Mathematics	math_double	98 is to 196 as 65 is to	130	x	0.42	0	0	{'x': 0.42, 'what': 0.18, '': 0.15, 'y': 0.12, 'X': 0.03}	3495	4.79631e-08	0.416016	0.965173	original		0.03	FALSE	FALSE	FALSE	out-of-context	{}
Mathematics	math_squares	14 is to 196 as 4 is to	16	x	0.42	0	0	{'x': 0.42, '': 0.27, 'what': 0.18, 'X': 0.05, 'y': 0.02}	1011	3.57628e-07	0.416015	0.989925	original		0.03	FALSE	FALSE	FALSE	out-of-context	{}
Mathematics	math_squares	2 is to 4 as 4 is to	16		0.42	0	0	{'': 0.42, 'x': 0.27, 'what': 0.07, 'X': 0.06, 'y': 0.05}	442	3.75509e-06	0.419918	0.995596	original		0.03	FALSE	FALSE	FALSE	out-of-context	{}
Mathematics	math_division2	62 is to 31 as 64 is to	32	x	0.42	0	0	{'x': 0.42, 'y': 0.29, 'what': 0.13, '': 0.04, 'Y': 0.04}	4283	2.85218e-08	0.417969	0.95732	original		0.03	FALSE	FALSE	FALSE	out-of-context	{}
Mathematics	math_division2	76 is to 38 as 62 is to	31	x	0.42	0	0	{'x': 0.42, 'y': 0.26, 'what': 0.16, '': 0.07, '\\(': 0.02}	5591	1.29803e-08	0.419922	0.944286	original		0.03	FALSE	FALSE	FALSE	out-of-context	{}
Mathematics	math_double	38 is to 76 as 74 is to	148	x	0.41	0	0	{'x': 0.41, 'y': 0.24, 'what': 0.17, '': 0.06, '\\(': 0.03}	10055	7.45058e-09	0.412109	0.899803	original		0.03	FALSE	FALSE	FALSE	out-of-context	{}
Mathematics	math_double	98 is to 196 as 8 is to	16	x	0.41	0	0	{'x': 0.41, 'what': 0.25, '': 0.23, 'y': 0.03, 'X': 0.02}	231	3.32296e-06	0.4082	0.997698	original		0.03	FALSE	FALSE	FALSE	out-of-context	{}
Mathematics	math_division2	54 is to 27 as 28 is to	14	x	0.41	0	0	{'x': 0.41, 'y': 0.19, 'what': 0.17, '': 0.1, 'X': 0.03}	961	2.44007e-07	0.414062	0.990424	original		0.03	FALSE	FALSE	FALSE	out-of-context	{}
Mathematics	math_division2	44 is to 22 as 28 is to	14	x	0.41	0	0	{'x': 0.41, 'what': 0.24, 'y': 0.18, '': 0.07, '\\(': 0.03}	923	2.75671e-07	0.412109	0.990802	original		0.03	FALSE	FALSE	FALSE	out-of-context	{}
Mathematics	math_division2	92 is to 46 as 62 is to	31	x	0.41	0	0	{'x': 0.41, 'what': 0.2, 'y': 0.16, '': 0.12, '\\(': 0.03}	5046	2.35159e-08	0.410156	0.949717	original		0.03	FALSE	FALSE	FALSE	out-of-context	{}
Mathematics	math_double	32 is to 64 as 65 is to	130	x	0.4	0	0	{'x': 0.4, 'what': 0.16, 'y': 0.15, '': 0.09, 'X': 0.07}	3350	7.40401e-08	0.400391	0.966618	original		0.03	FALSE	FALSE	FALSE	out-of-context	{}
Mathematics	math_double	34 is to 68 as 74 is to	148	y	0.4	0	0	{'y': 0.4, 'x': 0.34, 'what': 0.11, '\\(': 0.04, '': 0.03}	8448	1.30385e-08	0.404297	0.915816	original		0.03	FALSE	FALSE	FALSE	out-of-context	{}
Mathematics	math_double	16 is to 32 as 65 is to	130	x	0.4	0	0	{'x': 0.4, 'what': 0.21, '': 0.13, 'y': 0.1, 'X': 0.07}	3242	5.26197e-08	0.396484	0.967694	original		0.03	FALSE	FALSE	FALSE	out-of-context	{}
Mathematics	math_double	82 is to 164 as 98 is to	196	x	0.4	0	0	{'x': 0.4, 'what': 0.29, '': 0.13, 'y': 0.1, 'X': 0.02}	5007	2.65427e-08	0.396484	0.950106	original		0.03	FALSE	FALSE	FALSE	out-of-context	{}
Mathematics	math_division2	66 is to 33 as 62 is to	31	x	0.4	0	0	{'x': 0.4, 'what': 0.2, 'y': 0.18, '': 0.08, 'X': 0.03}	4838	4.61005e-08	0.396484	0.95179	original		0.03	FALSE	FALSE	FALSE	out-of-context	{}
Mathematics	math_division2	58 is to 29 as 94 is to	47	x	0.4	0	0	{'x': 0.4, 'y': 0.27, 'what': 0.19, '': 0.06, 'Y': 0.02}	1999	5.4948e-08	0.396484	0.98008	original		0.03	FALSE	FALSE	FALSE	out-of-context	{}
Mathematics	math_double	34 is to 68 as 28 is to	56	x	0.39	0	0	{'x': 0.39, 'y': 0.32, 'what': 0.15, '': 0.03, '\\(': 0.03}	1560	1.52737e-07	0.394531	0.984455	original		0.03	FALSE	FALSE	FALSE	out-of-context	{}
Mathematics	math_double	34 is to 68 as 65 is to	130	x	0.39	0	0	{'x': 0.39, 'y': 0.38, 'what': 0.07, '': 0.04, '\\(': 0.03}	6686	2.14204e-08	0.388672	0.933375	original		0.03	FALSE	FALSE	FALSE	out-of-context	{}
Mathematics	math_division2	66 is to 33 as 32 is to	16	x	0.39	0	0	{'x': 0.39, 'what': 0.21, 'y': 0.18, '': 0.11, 'X': 0.03}	423	1.40071e-06	0.38867	0.995785	original		0.03	FALSE	FALSE	FALSE	out-of-context	{}
Mathematics	math_double	88 is to 176 as 84 is to	168	x	0.38	0	0	{'x': 0.38, 'what': 0.28, 'y': 0.17, '': 0.09, '\\(': 0.02}	6981	1.73459e-08	0.384766	0.930435	original		0.03	FALSE	FALSE	FALSE	out-of-context	{}
Mathematics	math_division2	68 is to 34 as 32 is to	16	x	0.38	0	0	{'x': 0.38, 'y': 0.19, 'what': 0.17, '': 0.14, 'X': 0.03}	323	1.77324e-06	0.378904	0.996781	original		0.03	FALSE	FALSE	FALSE	out-of-context	{}
Mathematics	math_division2	62 is to 31 as 28 is to	14	x	0.38	0	0	{'x': 0.38, 'y': 0.24, 'what': 0.21, '': 0.06, '\\(': 0.03}	817	2.75671e-07	0.376953	0.991859	original		0.03	FALSE	FALSE	FALSE	out-of-context	{}
Mathematics	math_double	10 is to 20 as 8 is to	16	what	0.37	0	0	{'what': 0.37, 'x': 0.33, 'y': 0.12, '': 0.11, 'X': 0.02}	238	2.20537e-06	0.373045	0.997628	original		0.03	FALSE	FALSE	FALSE	out-of-context	{}
Mathematics	math_double	92 is to 184 as 74 is to	148	what	0.37	0	0	{'what': 0.37, 'x': 0.36, 'y': 0.12, '': 0.09, 'X': 0.01}	7619	8.73115e-09	0.367187	0.924077	original		0.03	FALSE	FALSE	FALSE	out-of-context	{}
Mathematics	math_division2	58 is to 29 as 64 is to	32	x	0.36	0	0	{'x': 0.36, 'y': 0.33, 'what': 0.15, '': 0.05, 'Y': 0.03}	4391	3.0268e-08	0.361328	0.956244	original		0.03	FALSE	FALSE	FALSE	out-of-context	{}
Mathematics	math_division2	58 is to 29 as 32 is to	16	x	0.35	0	0	{'x': 0.35, 'y': 0.25, 'what': 0.2, '': 0.1, 'Y': 0.02}	429	8.86619e-07	0.351562	0.995725	original		0.03	FALSE	FALSE	FALSE	out-of-context	{}
Mathematics	math_double	64 is to 128 as 65 is to	130	x	0.32	0	0	{'x': 0.32, '': 0.19, 'what': 0.17, 'y': 0.09, 'X': 0.07}	226	8.40425e-06	0.318351	0.997748	original		0.03	FALSE	FALSE	FALSE	out-of-context	{}
Mathematics	math_division2	58 is to 29 as 28 is to	14	x	0.32	0	0	{'x': 0.32, 'what': 0.23, 'y': 0.23, '': 0.1, 'Y': 0.03}	1101	2.8871e-07	0.322265	0.989029	original		0.03	FALSE	FALSE	FALSE	out-of-context	{}
Mathematics	math_division2	62 is to 31 as 32 is to	16	x	0.32	0	0	{'x': 0.32, 'y': 0.26, 'what': 0.19, '': 0.1, 'Y': 0.04}	435	9.83477e-07	0.324218	0.995665	original		0.03	FALSE	FALSE	FALSE	out-of-context	{}
Mathematics	math_double	66 is to 132 as 65 is to	130	x	0.3	0	0	{'x': 0.3, 'what': 0.26, '': 0.19, 'y': 0.12, 'X': 0.03}	612	1.05798e-06	0.30078	0.993901	original		0.03	FALSE	FALSE	FALSE	out-of-context	{}
Mathematics	math_division5	20 is to 4 as 65 is to	13	x	0.78	0	0	{'x': 0.78, 'y': 0.08, 'what': 0.04, '': 0.03, 'X': 0.03}	2383	3.11993e-08	0.777344	0.976254	original		0.02	FALSE	FALSE	FALSE	out-of-context	{}
Mathematics	math_division2	14 is to 7 as 80 is to	40	x	0.76	0	0	{'x': 0.76, 'y': 0.11, 'what': 0.03, 'X': 0.03, '': 0.02}	2729	3.63216e-08	0.761719	0.972806	original		0.02	FALSE	FALSE	FALSE	out-of-context	{}
Mathematics	math_division2	26 is to 13 as 80 is to	40	x	0.75	0	0	{'x': 0.75, 'y': 0.12, 'X': 0.03, 'what': 0.03, '\\(': 0.02}	2345	2.6077e-08	0.746094	0.976632	original		0.02	FALSE	FALSE	FALSE	out-of-context	{}
Mathematics	math_division5	60 is to 12 as 80 is to	16	x	0.75	0	0	{'x': 0.75, 'y': 0.13, 'what': 0.04, '': 0.02, 'X': 0.02}	562	2.28174e-07	0.746094	0.9944	original		0.02	FALSE	FALSE	FALSE	out-of-context	{}
Mathematics	math_division2	24 is to 12 as 80 is to	40	x	0.74	0	0	{'x': 0.74, 'y': 0.1, 'what': 0.07, '': 0.03, 'X': 0.02}	1922	4.16767e-08	0.742187	0.980847	original		0.02	FALSE	FALSE	FALSE	out-of-context	{}
Mathematics	math_division2	26 is to 13 as 96 is to	48	x	0.74	0	0	{'x': 0.74, 'y': 0.13, 'what': 0.04, 'X': 0.03, '\\(': 0.02}	3625	1.46683e-08	0.742187	0.963877	original		0.02	FALSE	FALSE	FALSE	out-of-context	{}
Mathematics	math_division2	6 is to 3 as 96 is to	48	x	0.74	0	0	{'x': 0.74, 'y': 0.12, 'what': 0.04, '': 0.03, 'X': 0.03}	6385	1.2049e-08	0.742187	0.936374	original		0.02	FALSE	FALSE	FALSE	out-of-context	{}
Mathematics	math_division2	10 is to 5 as 50 is to	25	x	0.74	0	0	{'x': 0.74, 'y': 0.12, 'what': 0.05, 'X': 0.02, '': 0.02}	1075	1.10362e-07	0.742187	0.989288	original		0.02	FALSE	FALSE	FALSE	out-of-context	{}
Mathematics	math_division2	100 is to 50 as 60 is to	30	x	0.74	0	0	{'x': 0.74, 'y': 0.09, 'what': 0.06, 'X': 0.03, '': 0.02}	2520	2.45636e-08	0.738281	0.974888	original		0.02	FALSE	FALSE	FALSE	out-of-context	{}
Mathematics	math_double	30 is to 60 as 15 is to	30	x	0.73	0	0	{'x': 0.73, '': 0.1, 'y': 0.06, 'X': 0.04, 'what': 0.03}	755	1.61119e-07	0.730469	0.992476	original		0.02	FALSE	FALSE	FALSE	out-of-context	{}
Mathematics	math_division2	34 is to 17 as 80 is to	40	x	0.73	0	0	{'x': 0.73, 'y': 0.12, '': 0.04, 'what': 0.03, '\\(': 0.02}	1920	4.49363e-08	0.734375	0.980867	original		0.02	FALSE	FALSE	FALSE	out-of-context	{}
Mathematics	math_division2	28 is to 14 as 96 is to	48	x	0.73	0	0	{'x': 0.73, 'y': 0.1, 'what': 0.06, 'X': 0.03, '': 0.03}	3766	2.22353e-08	0.734375	0.962472	original		0.02	FALSE	FALSE	FALSE	out-of-context	{}
Mathematics	math_division2	50 is to 25 as 80 is to	40	x	0.73	0	0	{'x': 0.73, 'y': 0.1, 'what': 0.05, 'X': 0.03, '': 0.03}	988	9.40636e-08	0.730469	0.990155	original		0.02	FALSE	FALSE	FALSE	out-of-context	{}
Mathematics	math_division2	100 is to 50 as 26 is to	13	x	0.73	0	0	{'x': 0.73, 'y': 0.08, 'what': 0.05, '': 0.05, 'X': 0.04}	3417	2.53785e-08	0.730469	0.96595	original		0.02	FALSE	FALSE	FALSE	out-of-context	{}
Mathematics	math_division2	100 is to 50 as 34 is to	17	x	0.73	0	0	{'x': 0.73, 'y': 0.06, 'what': 0.06, '': 0.05, 'X': 0.04}	3581	2.16532e-08	0.734375	0.964316	original		0.02	FALSE	FALSE	FALSE	out-of-context	{}
Mathematics	math_division2	100 is to 50 as 76 is to	38	x	0.73	0	0	{'x': 0.73, 'what': 0.08, 'y': 0.07, '': 0.04, 'X': 0.04}	9619	3.24508e-09	0.726562	0.904147	original		0.02	FALSE	FALSE	FALSE	out-of-context	{}
Mathematics	math_division5	65 is to 13 as 80 is to	16	x	0.73	0	0	{'x': 0.73, 'y': 0.13, '\\(': 0.04, 'what': 0.03, '': 0.02}	514	2.66358e-07	0.734375	0.994878	original		0.02	FALSE	FALSE	FALSE	out-of-context	{}
Mathematics	math_division2	34 is to 17 as 96 is to	48	x	0.72	0	0	{'x': 0.72, 'y': 0.14, '': 0.04, 'what': 0.04, 'X': 0.02}	2861	2.98023e-08	0.722656	0.97149	original		0.02	FALSE	FALSE	FALSE	out-of-context	{}
Mathematics	math_division2	36 is to 18 as 96 is to	48	x	0.72	0	0	{'x': 0.72, 'y': 0.12, 'what': 0.05, '': 0.04, 'X': 0.02}	2062	3.18978e-08	0.71875	0.979452	original		0.02	FALSE	FALSE	FALSE	out-of-context	{}
Mathematics	math_division2	30 is to 15 as 76 is to	38	x	0.72	0	0	{'x': 0.72, 'y': 0.08, '': 0.06, 'what': 0.06, 'X': 0.03}	9197	3.28873e-09	0.71875	0.908353	original		0.02	FALSE	FALSE	FALSE	out-of-context	{}
Mathematics	math_squares	20 is to 400 as 25 is to	625	x	0.72	0	0	{'x': 0.72, 'y': 0.06, 'what': 0.06, 'X': 0.05, '': 0.05}	7749	6.49015e-09	0.71875	0.922782	original		0.02	FALSE	FALSE	FALSE	out-of-context	{}
Mathematics	math_division2	6 is to 3 as 80 is to	40	x	0.72	0	0	{'x': 0.72, 'y': 0.11, 'what': 0.04, '': 0.04, 'X': 0.03}	2450	5.19212e-08	0.722656	0.975586	original		0.02	FALSE	FALSE	FALSE	out-of-context	{}
Mathematics	math_division2	100 is to 50 as 94 is to	47	x	0.72	0	0	{'x': 0.72, 'what': 0.08, 'y': 0.07, '': 0.03, 'X': 0.03}	6516	7.85803e-09	0.722656	0.935069	original		0.02	FALSE	FALSE	FALSE	out-of-context	{}
Mathematics	math_division2	100 is to 50 as 64 is to	32	x	0.72	0	0	{'x': 0.72, 'y': 0.08, 'what': 0.06, '': 0.04, 'X': 0.03}	6695	1.10595e-08	0.71875	0.933285	original		0.02	FALSE	FALSE	FALSE	out-of-context	{}
Mathematics	math_double	60 is to 120 as 20 is to	40	x	0.71	0	0	{'x': 0.71, 'y': 0.09, '': 0.05, 'what': 0.05, 'X': 0.04}	547	2.40281e-07	0.710937	0.994549	original		0.02	FALSE	FALSE	FALSE	out-of-context	{}
Mathematics	math_division2	24 is to 12 as 60 is to	30	x	0.71	0	0	{'x': 0.71, 'y': 0.11, 'what': 0.09, '': 0.02, 'X': 0.02}	4146	1.64146e-08	0.710937	0.958685	original		0.02	FALSE	FALSE	FALSE	out-of-context	{}
Mathematics	math_division2	30 is to 15 as 94 is to	47	x	0.71	0	0	{'x': 0.71, '': 0.09, 'y': 0.07, 'what': 0.06, 'X': 0.03}	4448	1.28639e-08	0.707031	0.955676	original		0.02	FALSE	FALSE	FALSE	out-of-context	{}
Mathematics	math_division2	28 is to 14 as 80 is to	40	x	0.71	0	0	{'x': 0.71, 'y': 0.11, 'what': 0.06, 'X': 0.03, '': 0.03}	2171	5.12227e-08	0.710937	0.978366	original		0.02	FALSE	FALSE	FALSE	out-of-context	{}
Mathematics	math_squares	15 is to 225 as 26 is to	676	x	0.71	0	0	{'x': 0.71, 'what': 0.08, 'y': 0.08, '': 0.05, 'X': 0.03}	30829	2.6921e-10	0.710937	0.692791	original		0.02	FALSE	FALSE	FALSE	out-of-context	{}
Mathematics	math_division2	12 is to 6 as 80 is to	40	x	0.71	0	0	{'x': 0.71, 'y': 0.13, '': 0.05, 'what': 0.04, 'X': 0.02}	1406	6.56582e-08	0.714844	0.985989	original		0.02	FALSE	FALSE	FALSE	out-of-context	{}
Mathematics	math_double	65 is to 130 as 20 is to	40	x	0.7	0	0	{'x': 0.7, 'what': 0.08, 'y': 0.07, '': 0.06, 'X': 0.04}	769	1.39698e-07	0.703125	0.992337	original		0.02	FALSE	FALSE	FALSE	out-of-context	{}
Mathematics	math_division2	36 is to 18 as 80 is to	40	x	0.7	0	0	{'x': 0.7, 'y': 0.15, 'what': 0.05, '': 0.04, 'X': 0.02}	1172	6.65896e-08	0.695312	0.988321	original		0.02	FALSE	FALSE	FALSE	out-of-context	{}
Mathematics	math_division2	24 is to 12 as 94 is to	47	x	0.7	0	0	{'x': 0.7, '': 0.08, 'y': 0.08, 'what': 0.07, 'X': 0.02}	4180	1.83936e-08	0.699219	0.958347	original		0.02	FALSE	FALSE	FALSE	out-of-context	{}
Mathematics	math_division2	26 is to 13 as 94 is to	47	x	0.7	0	0	{'x': 0.7, 'y': 0.13, 'what': 0.06, 'X': 0.03, '': 0.03}	3731	1.54832e-08	0.703125	0.962821	original		0.02	FALSE	FALSE	FALSE	out-of-context	{}
Mathematics	math_division2	50 is to 25 as 76 is to	38	x	0.7	0	0	{'x': 0.7, 'y': 0.08, 'what': 0.08, '': 0.06, 'X': 0.04}	8731	3.8126e-09	0.699219	0.912996	original		0.02	FALSE	FALSE	FALSE	out-of-context	{}
Mathematics	math_division2	40 is to 20 as 76 is to	38	x	0.7	0	0	{'x': 0.7, 'y': 0.1, 'what': 0.07, '': 0.07, 'X': 0.03}	7522	5.03496e-09	0.703125	0.925044	original		0.02	FALSE	FALSE	FALSE	out-of-context	{}
Mathematics	math_squares	30 is to 900 as 26 is to	676	x	0.7	0	0	{'x': 0.7, 'what': 0.12, 'y': 0.09, '': 0.03, 'X': 0.02}	31371	2.03727e-10	0.695312	0.68739	original		0.02	FALSE	FALSE	FALSE	out-of-context	{}
Mathematics	math_squares	30 is to 900 as 25 is to	625	x	0.7	0	0	{'x': 0.7, 'what': 0.1, 'y': 0.07, 'X': 0.03, '': 0.03}	11028	2.45927e-09	0.703125	0.890107	original		0.02	FALSE	FALSE	FALSE	out-of-context	{}
Mathematics	math_squares	15 is to 225 as 25 is to	625	x	0.7	0	0	{'x': 0.7, '': 0.08, 'what': 0.07, 'y': 0.07, 'X': 0.04}	5438	8.44011e-09	0.695312	0.945811	original		0.02	FALSE	FALSE	FALSE	out-of-context	{}
Mathematics	math_division2	70 is to 35 as 94 is to	47	x	0.7	0	0	{'x': 0.7, 'y': 0.12, '': 0.06, 'what': 0.05, '\\(': 0.02}	3051	2.6077e-08	0.699219	0.969597	original		0.02	FALSE	FALSE	FALSE	out-of-context	{}
Mathematics	math_double	75 is to 150 as 20 is to	40	x	0.69	0	0	{'x': 0.69, '': 0.08, 'X': 0.06, 'what': 0.06, 'y': 0.05}	1219	1.08965e-07	0.691406	0.987853	original		0.02	FALSE	FALSE	FALSE	out-of-context	{}
Mathematics	math_division2	24 is to 12 as 76 is to	38	x	0.69	0	0	{'x': 0.69, 'what': 0.11, 'y': 0.09, '': 0.05, 'X': 0.02}	10174	3.65253e-09	0.6875	0.898617	original		0.02	FALSE	FALSE	FALSE	out-of-context	{}
Mathematics	math_division2	30 is to 15 as 62 is to	31	x	0.69	0	0	{'x': 0.69, 'y': 0.09, '': 0.08, 'what': 0.06, 'X': 0.03}	8361	4.33647e-09	0.6875	0.916683	original		0.02	FALSE	FALSE	FALSE	out-of-context	{}
Mathematics	math_division2	28 is to 14 as 76 is to	38	x	0.69	0	0	{'x': 0.69, 'y': 0.09, 'what': 0.08, '': 0.05, 'X': 0.04}	9161	6.25732e-09	0.6875	0.908711	original		0.02	FALSE	FALSE	FALSE	out-of-context	{}
Mathematics	math_division2	20 is to 10 as 64 is to	32	x	0.69	0	0	{'x': 0.69, 'y': 0.13, 'what': 0.08, '': 0.04, 'X': 0.02}	5294	1.5134e-08	0.6875	0.947246	original		0.02	FALSE	FALSE	FALSE	out-of-context	{}
Mathematics	math_division5	40 is to 8 as 85 is to	17	x	0.69	0	0	{'x': 0.69, 'y': 0.16, 'what': 0.06, '': 0.04, 'X': 0.01}	2939	2.96859e-08	0.691406	0.970713	original		0.02	FALSE	FALSE	FALSE	out-of-context	{}
Mathematics	math_division5	75 is to 15 as 80 is to	16	x	0.69	0	0	{'x': 0.69, 'what': 0.1, 'y': 0.07, '': 0.06, 'X': 0.03}	709	2.01166e-07	0.691406	0.992935	original		0.02	FALSE	FALSE	FALSE	out-of-context	{}
Mathematics	math_division2	34 is to 17 as 76 is to	38	x	0.68	0	0	{'x': 0.68, 'y': 0.13, 'what': 0.07, '': 0.05, 'X': 0.03}	6222	1.21072e-08	0.679687	0.937998	original		0.02	FALSE	FALSE	FALSE	out-of-context	{}
Mathematics	math_division2	30 is to 15 as 46 is to	23	x	0.68	0	0	{'x': 0.68, '': 0.09, 'y': 0.08, 'what': 0.07, 'X': 0.04}	2549	2.30502e-08	0.679687	0.974599	original		0.02	FALSE	FALSE	FALSE	out-of-context	{}
Mathematics	math_division2	30 is to 15 as 34 is to	17	x	0.68	0	0	{'x': 0.68, 'y': 0.09, '': 0.08, 'what': 0.08, 'X': 0.03}	1858	4.4005e-08	0.679687	0.981485	original		0.02	FALSE	FALSE	FALSE	out-of-context	{}
Mathematics	math_division2	30 is to 15 as 64 is to	32	x	0.68	0	0	{'x': 0.68, 'y': 0.11, 'what': 0.07, '': 0.06, 'X': 0.03}	5251	1.44355e-08	0.683594	0.947674	original		0.02	FALSE	FALSE	FALSE	out-of-context	{}
Mathematics	math_division2	8 is to 4 as 64 is to	32	x	0.68	0	0	{'x': 0.68, 'y': 0.14, 'what': 0.06, 'X': 0.03, '': 0.03}	5910	1.72295e-08	0.683594	0.941107	original		0.02	FALSE	FALSE	FALSE	out-of-context	{}
Mathematics	math_division2	10 is to 5 as 64 is to	32	x	0.68	0	0	{'x': 0.68, 'y': 0.15, 'what': 0.06, '': 0.03, 'X': 0.02}	5998	1.68802e-08	0.679687	0.94023	original		0.02	FALSE	FALSE	FALSE	out-of-context	{}
Mathematics	math_division2	10 is to 5 as 76 is to	38	x	0.68	0	0	{'x': 0.68, 'y': 0.11, 'what': 0.07, '': 0.06, 'X': 0.03}	11434	4.80213e-09	0.675781	0.886061	original		0.02	FALSE	FALSE	FALSE	out-of-context	{}
Mathematics	math_division2	100 is to 50 as 46 is to	23	x	0.68	0	0	{'x': 0.68, '': 0.07, 'what': 0.07, 'y': 0.06, 'X': 0.05}	3884	2.17697e-08	0.679687	0.961296	original		0.02	FALSE	FALSE	FALSE	out-of-context	{}
Mathematics	math_double	40 is to 80 as 8 is to	16	x	0.67	0	0	{'x': 0.67, '': 0.12, 'what': 0.08, 'y': 0.07, '\\(': 0.01}	153	3.7998e-06	0.667965	0.998475	original		0.02	FALSE	FALSE	FALSE	out-of-context	{}
Mathematics	math_double	70 is to 140 as 56 is to	112	x	0.67	0	0	{'x': 0.67, 'y': 0.09, 'what': 0.09, '': 0.08, 'X': 0.03}	10059	3.04135e-09	0.667969	0.899763	original		0.02	FALSE	FALSE	FALSE	out-of-context	{}
Mathematics	math_division2	26 is to 13 as 76 is to	38	x	0.67	0	0	{'x': 0.67, 'y': 0.12, 'what': 0.08, 'X': 0.04, '': 0.04}	7664	6.0827e-09	0.671875	0.923629	original		0.02	FALSE	FALSE	FALSE	out-of-context	{}
Mathematics	math_division2	90 is to 45 as 80 is to	40	x	0.67	0	0	{'x': 0.67, 'y': 0.13, 'what': 0.06, '': 0.04, 'X': 0.03}	1170	1.30385e-07	0.667969	0.988341	original		0.02	FALSE	FALSE	FALSE	out-of-context	{}
Mathematics	math_double	36 is to 72 as 20 is to	40	x	0.66	0	0	{'x': 0.66, 'what': 0.11, 'y': 0.08, '': 0.07, 'X': 0.04}	631	2.57045e-07	0.660156	0.993712	original		0.02	FALSE	FALSE	FALSE	out-of-context	{}
Mathematics	math_double	6 is to 12 as 20 is to	40	x	0.66	0	0	{'x': 0.66, 'y': 0.17, 'what': 0.06, 'X': 0.04, '': 0.03}	1321	7.77654e-08	0.65625	0.986836	original		0.02	FALSE	FALSE	FALSE	out-of-context	{}
Mathematics	math_double	80 is to 160 as 20 is to	40	x	0.66	0	0	{'x': 0.66, '': 0.12, 'X': 0.06, 'y': 0.06, 'what': 0.05}	360	6.63102e-07	0.656249	0.996413	original		0.02	FALSE	FALSE	FALSE	out-of-context	{}
Mathematics	math_double	60 is to 120 as 30 is to	60	x	0.66	0	0	{'x': 0.66, 'y': 0.15, 'what': 0.06, '': 0.04, 'X': 0.04}	806	1.15484e-07	0.65625	0.991968	original		0.02	FALSE	FALSE	FALSE	out-of-context	{}
Mathematics	math_double	60 is to 120 as 72 is to	144	x	0.66	0	0	{'x': 0.66, 'y': 0.15, 'what': 0.07, '': 0.04, 'X': 0.03}	5858	7.50879e-09	0.65625	0.941625	original		0.02	FALSE	FALSE	FALSE	out-of-context	{}
Mathematics	math_double	65 is to 130 as 30 is to	60	x	0.66	0	0	{'x': 0.66, 'y': 0.12, 'what': 0.08, '': 0.04, 'X': 0.04}	1647	5.05242e-08	0.664062	0.983588	original		0.02	FALSE	FALSE	FALSE	out-of-context	{}
Mathematics	math_double	70 is to 140 as 85 is to	170	x	0.66	0	0	{'x': 0.66, '': 0.1, 'what': 0.09, 'y': 0.09, 'X': 0.02}	759	1.32248e-07	0.664062	0.992437	original		0.02	FALSE	FALSE	FALSE	out-of-context	{}
Mathematics	math_division2	50 is to 25 as 34 is to	17	x	0.66	0	0	{'x': 0.66, 'what': 0.09, 'y': 0.08, '': 0.07, 'X': 0.04}	3634	2.08383e-08	0.664062	0.963787	original		0.02	FALSE	FALSE	FALSE	out-of-context	{}
Mathematics	math_division2	40 is to 20 as 50 is to	25	x	0.66	0	0	{'x': 0.66, 'y': 0.14, '': 0.08, 'X': 0.04, 'what': 0.04}	620	2.51457e-07	0.65625	0.993822	original		0.02	FALSE	FALSE	FALSE	out-of-context	{}
Mathematics	math_division2	4 is to 2 as 64 is to	32	x	0.66	0	0	{'x': 0.66, 'y': 0.12, 'what': 0.07, '': 0.05, 'X': 0.04}	5458	2.51457e-08	0.65625	0.945611	original		0.02	FALSE	FALSE	FALSE	out-of-context	{}
Mathematics	math_division2	14 is to 7 as 62 is to	31	x	0.66	0	0	{'x': 0.66, 'y': 0.12, 'what': 0.06, '': 0.05, 'X': 0.04}	8947	8.73115e-09	0.660156	0.910844	original		0.02	FALSE	FALSE	FALSE	out-of-context	{}
Mathematics	math_division2	8 is to 4 as 26 is to	13	x	0.66	0	0	{'x': 0.66, 'y': 0.15, 'what': 0.07, '': 0.05, 'X': 0.03}	1612	8.5216e-08	0.65625	0.983937	original		0.02	FALSE	FALSE	FALSE	out-of-context	{}
Mathematics	math_division2	10 is to 5 as 26 is to	13	x	0.66	0	0	{'x': 0.66, 'y': 0.15, 'what': 0.07, '': 0.04, 'X': 0.03}	1341	1.08965e-07	0.664062	0.986637	original		0.02	FALSE	FALSE	FALSE	out-of-context	{}
Mathematics	math_division2	12 is to 6 as 76 is to	38	x	0.66	0	0	{'x': 0.66, 'y': 0.11, '': 0.08, 'what': 0.07, 'X': 0.02}	8204	6.89761e-09	0.660156	0.918248	original		0.02	FALSE	FALSE	FALSE	out-of-context	{}
Mathematics	math_division2	14 is to 7 as 26 is to	13	x	0.66	0	0	{'x': 0.66, 'y': 0.16, 'what': 0.06, '': 0.04, 'X': 0.03}	1655	7.31088e-08	0.660156	0.983508	original		0.02	FALSE	FALSE	FALSE	out-of-context	{}
Mathematics	math_division2	90 is to 45 as 76 is to	38	x	0.66	0	0	{'x': 0.66, 'y': 0.12, 'what': 0.07, '': 0.06, 'X': 0.03}	7973	5.96629e-09	0.660156	0.92055	original		0.02	FALSE	FALSE	FALSE	out-of-context	{}
Mathematics	math_division2	80 is to 40 as 76 is to	38	x	0.66	0	0	{'x': 0.66, 'y': 0.13, '': 0.07, 'what': 0.06, 'X': 0.03}	8531	5.44242e-09	0.65625	0.914989	original		0.02	FALSE	FALSE	FALSE	out-of-context	{}
Mathematics	math_double	50 is to 100 as 30 is to	60	x	0.65	0	0	{'x': 0.65, 'y': 0.13, 'what': 0.07, 'X': 0.05, '': 0.04}	1183	7.96281e-08	0.648437	0.988211	original		0.02	FALSE	FALSE	FALSE	out-of-context	{}
Mathematics	math_double	80 is to 160 as 30 is to	60	x	0.65	0	0	{'x': 0.65, '': 0.1, 'y': 0.08, 'what': 0.06, 'X': 0.06}	517	3.03611e-07	0.648437	0.994848	original		0.02	FALSE	FALSE	FALSE	out-of-context	{}
Mathematics	math_division2	36 is to 18 as 64 is to	32	x	0.65	0	0	{'x': 0.65, 'y': 0.17, 'what': 0.06, '': 0.05, 'X': 0.02}	3493	1.89757e-08	0.652344	0.965193	original		0.02	FALSE	FALSE	FALSE	out-of-context	{}
Mathematics	math_division2	26 is to 13 as 64 is to	32	x	0.65	0	0	{'x': 0.65, 'y': 0.17, 'what': 0.06, 'X': 0.03, '\\(': 0.02}	5569	1.28057e-08	0.648437	0.944505	original		0.02	FALSE	FALSE	FALSE	out-of-context	{}
Mathematics	math_division2	50 is to 25 as 46 is to	23	x	0.65	0	0	{'x': 0.65, 'what': 0.09, 'y': 0.09, '': 0.07, 'X': 0.04}	4333	1.71131e-08	0.648437	0.956822	original		0.02	FALSE	FALSE	FALSE	out-of-context	{}
Mathematics	math_division2	48 is to 24 as 80 is to	40	x	0.65	0	0	{'x': 0.65, 'y': 0.15, 'what': 0.08, '': 0.04, 'X': 0.03}	1773	6.33299e-08	0.652344	0.982332	original		0.02	FALSE	FALSE	FALSE	out-of-context	{}
Mathematics	math_division2	14 is to 7 as 46 is to	23	x	0.65	0	0	{'x': 0.65, 'y': 0.12, 'what': 0.08, '': 0.05, 'X': 0.03}	3823	2.92202e-08	0.652344	0.961904	original		0.02	FALSE	FALSE	FALSE	out-of-context	{}
Mathematics	math_division2	20 is to 10 as 58 is to	29	x	0.65	0	0	{'x': 0.65, 'what': 0.11, 'y': 0.09, '': 0.08, 'X': 0.02}	4441	1.5134e-08	0.652344	0.955746	original		0.02	FALSE	FALSE	FALSE	out-of-context	{}
Mathematics	math_division2	20 is to 10 as 46 is to	23	x	0.65	0	0	{'x': 0.65, '': 0.1, 'what': 0.09, 'y': 0.09, 'X': 0.03}	2821	3.00352e-08	0.648437	0.971889	original		0.02	FALSE	FALSE	FALSE	out-of-context	{}
Mathematics	math_division5	65 is to 13 as 85 is to	17	x	0.65	0	0	{'x': 0.65, 'y': 0.15, 'what': 0.05, '': 0.04, '\\(': 0.04}	2022	6.37956e-08	0.652344	0.979851	original		0.02	FALSE	FALSE	FALSE	out-of-context	{}
Mathematics	math_division2	90 is to 45 as 62 is to	31	x	0.65	0	0	{'x': 0.65, 'y': 0.12, '': 0.08, 'what': 0.07, 'X': 0.03}	8432	5.64614e-09	0.648437	0.915976	original		0.02	FALSE	FALSE	FALSE	out-of-context	{}
Mathematics	math_division2	80 is to 40 as 62 is to	31	x	0.65	0	0	{'x': 0.65, 'y': 0.12, '': 0.09, 'what': 0.05, 'X': 0.03}	8882	4.83124e-09	0.652344	0.911492	original		0.02	FALSE	FALSE	FALSE	out-of-context	{}
Mathematics	math_double	30 is to 60 as 24 is to	48	x	0.64	0	0	{'x': 0.64, 'y': 0.13, 'what': 0.08, '': 0.06, 'X': 0.04}	4076	1.58325e-08	0.640625	0.959383	original		0.02	FALSE	FALSE	FALSE	out-of-context	{}
Mathematics	math_double	50 is to 100 as 72 is to	144	x	0.64	0	0	{'x': 0.64, 'y': 0.12, 'what': 0.09, '': 0.05, 'X': 0.04}	7429	6.69388e-09	0.644531	0.925971	original		0.02	FALSE	FALSE	FALSE	out-of-context	{}
Mathematics	math_double	95 is to 190 as 20 is to	40	x	0.64	0	0	{'x': 0.64, 'y': 0.08, 'what': 0.07, '': 0.07, 'X': 0.04}	1432	1.71363e-07	0.644531	0.98573	original		0.02	FALSE	FALSE	FALSE	out-of-context	{}
Mathematics	math_double	72 is to 144 as 20 is to	40	x	0.64	0	0	{'x': 0.64, 'what': 0.11, '': 0.09, 'y': 0.07, 'X': 0.03}	1021	1.60187e-07	0.640625	0.989826	original		0.02	FALSE	FALSE	FALSE	out-of-context	{}
Mathematics	math_division2	38 is to 19 as 96 is to	48	x	0.64	0	0	{'x': 0.64, 'y': 0.18, 'what': 0.06, 'X': 0.04, '': 0.03}	2171	4.5402e-08	0.636719	0.978366	original		0.02	FALSE	FALSE	FALSE	out-of-context	{}
Mathematics	math_division2	24 is to 12 as 46 is to	23	x	0.64	0	0	{'x': 0.64, 'what': 0.1, '': 0.09, 'y': 0.09, 'X': 0.03}	2362	4.1211e-08	0.640625	0.976463	original		0.02	FALSE	FALSE	FALSE	out-of-context	{}
Mathematics	math_division2	48 is to 24 as 76 is to	38	x	0.64	0	0	{'x': 0.64, 'y': 0.12, 'what': 0.11, '': 0.05, 'X': 0.03}	6637	7.567e-09	0.636719	0.933863	original		0.02	FALSE	FALSE	FALSE	out-of-context	{}
Mathematics	math_division2	6 is to 3 as 64 is to	32	x	0.64	0	0	{'x': 0.64, 'y': 0.15, 'what': 0.08, '': 0.04, 'X': 0.03}	7096	1.44355e-08	0.640625	0.929289	original		0.02	FALSE	FALSE	FALSE	out-of-context	{}
Mathematics	math_division2	12 is to 6 as 64 is to	32	x	0.64	0	0	{'x': 0.64, 'y': 0.17, 'what': 0.07, '': 0.05, '\\(': 0.02}	5016	1.72295e-08	0.644531	0.950016	original		0.02	FALSE	FALSE	FALSE	out-of-context	{}
Mathematics	math_division2	96 is to 48 as 80 is to	40	x	0.64	0	0	{'x': 0.64, 'what': 0.12, 'y': 0.12, '': 0.03, '\\(': 0.03}	1750	7.12462e-08	0.636719	0.982561	original		0.02	FALSE	FALSE	FALSE	out-of-context	{}
Mathematics	math_division2	70 is to 35 as 46 is to	23	x	0.64	0	0	{'x': 0.64, 'y': 0.11, '': 0.1, 'what': 0.06, 'X': 0.03}	3548	2.57278e-08	0.644531	0.964644	original		0.02	FALSE	FALSE	FALSE	out-of-context	{}
Mathematics	math_division2	72 is to 36 as 80 is to	40	x	0.64	0	0	{'x': 0.64, 'y': 0.16, 'what': 0.08, '': 0.04, '\\(': 0.02}	1671	6.65896e-08	0.640625	0.983349	original		0.02	FALSE	FALSE	FALSE	out-of-context	{}
Mathematics	math_division2	70 is to 35 as 76 is to	38	x	0.64	0	0	{'x': 0.64, 'y': 0.15, 'what': 0.07, '': 0.06, '\\(': 0.02}	6901	8.73115e-09	0.640625	0.931232	original		0.02	FALSE	FALSE	FALSE	out-of-context	{}
Mathematics	math_double	35 is to 70 as 56 is to	112	x	0.63	0	0	{'x': 0.63, 'y': 0.16, 'what': 0.08, '': 0.05, '\\(': 0.03}	9597	3.47791e-09	0.628906	0.904367	original		0.02	FALSE	FALSE	FALSE	out-of-context	{}
Mathematics	math_double	52 is to 104 as 16 is to	32	x	0.63	0	0	{'x': 0.63, '': 0.11, 'what': 0.1, 'y': 0.05, 'X': 0.05}	1952	7.68341e-08	0.632812	0.980548	original		0.02	FALSE	FALSE	FALSE	out-of-context	{}
Mathematics	math_double	45 is to 90 as 15 is to	30	x	0.63	0	0	{'x': 0.63, 'y': 0.09, '': 0.09, 'what': 0.08, '\\(': 0.03}	820	1.89058e-07	0.628906	0.991829	original		0.02	FALSE	FALSE	FALSE	out-of-context	{}
Mathematics	math_double	30 is to 60 as 16 is to	32	x	0.63	0	0	{'x': 0.63, '': 0.17, 'y': 0.09, 'what': 0.05, 'X': 0.03}	2939	2.30502e-08	0.628906	0.970713	original		0.02	FALSE	FALSE	FALSE	out-of-context	{}
Mathematics	math_double	60 is to 120 as 26 is to	52	x	0.63	0	0	{'x': 0.63, 'y': 0.12, '': 0.08, 'what': 0.08, 'X': 0.04}	5730	8.26549e-09	0.628906	0.942901	original		0.02	FALSE	FALSE	FALSE	out-of-context	{}
Mathematics	math_double	75 is to 150 as 28 is to	56	x	0.63	0	0	{'x': 0.63, 'what': 0.1, '': 0.1, 'y': 0.06, 'X': 0.05}	4037	1.53668e-08	0.632812	0.959772	original		0.02	FALSE	FALSE	FALSE	out-of-context	{}
Mathematics	math_division2	34 is to 17 as 62 is to	31	x	0.63	0	0	{'x': 0.63, 'y': 0.16, '': 0.06, 'what': 0.06, 'X': 0.03}	5450	1.6531e-08	0.628906	0.945691	original		0.02	FALSE	FALSE	FALSE	out-of-context	{}
Mathematics	math_division2	28 is to 14 as 46 is to	23	x	0.63	0	0	{'x': 0.63, 'y': 0.12, 'what': 0.08, '': 0.06, 'X': 0.05}	2677	4.2608e-08	0.632812	0.973324	original		0.02	FALSE	FALSE	FALSE	out-of-context	{}
Mathematics	math_cubes	5 is to 125 as 8 is to	512	x	0.63	0	0	{'x': 0.63, 'what': 0.13, 'y': 0.11, '': 0.08, 'X': 0.02}	12634	2.38651e-09	0.628906	0.874103	original		0.02	FALSE	FALSE	FALSE	out-of-context	{}
Mathematics	math_squares	12 is to 144 as 25 is to	625	x	0.63	0	0	{'x': 0.63, 'what': 0.11, 'y': 0.11, '': 0.07, 'X': 0.03}	11825	3.15777e-09	0.628906	0.882165	original		0.02	FALSE	FALSE	FALSE	out-of-context	{}
Mathematics	math_division2	8 is to 4 as 62 is to	31	x	0.63	0	0	{'x': 0.63, 'y': 0.13, 'what': 0.08, '': 0.07, 'X': 0.04}	7251	1.14669e-08	0.632812	0.927744	original		0.02	FALSE	FALSE	FALSE	out-of-context	{}
Mathematics	math_division2	60 is to 30 as 94 is to	47	x	0.63	0	0	{'x': 0.63, 'y': 0.14, '': 0.08, 'what': 0.07, 'X': 0.03}	2956	2.07219e-08	0.628906	0.970544	original		0.02	FALSE	FALSE	FALSE	out-of-context	{}
Mathematics	math_double	40 is to 80 as 16 is to	32	x	0.62	0	0	{'x': 0.62, '': 0.16, 'y': 0.09, 'what': 0.05, 'X': 0.03}	1766	6.89179e-08	0.617187	0.982402	original		0.02	FALSE	FALSE	FALSE	out-of-context	{}
Mathematics	math_double	50 is to 100 as 24 is to	48	x	0.62	0	0	{'x': 0.62, 'what': 0.1, 'y': 0.09, '': 0.07, 'X': 0.05}	4189	1.94414e-08	0.617187	0.958257	original		0.02	FALSE	FALSE	FALSE	out-of-context	{}
Mathematics	math_double	6 is to 12 as 28 is to	56	x	0.62	0	0	{'x': 0.62, 'y': 0.2, 'what': 0.07, 'X': 0.04, '': 0.03}	4638	1.52504e-08	0.621094	0.953783	original		0.02	FALSE	FALSE	FALSE	out-of-context	{}
Mathematics	math_double	100 is to 200 as 46 is to	92	x	0.62	0	0	{'x': 0.62, 'X': 0.1, '': 0.09, 'what': 0.08, 'y': 0.05}	13076	1.59343e-09	0.625	0.869699	original		0.02	FALSE	FALSE	FALSE	out-of-context	{}
Mathematics	math_division2	40 is to 20 as 26 is to	13	x	0.62	0	0	{'x': 0.62, 'y': 0.13, '': 0.09, 'what': 0.08, 'X': 0.03}	2730	3.81842e-08	0.625	0.972796	original		0.02	FALSE	FALSE	FALSE	out-of-context	{}
Mathematics	math_division2	36 is to 18 as 76 is to	38	x	0.62	0	0	{'x': 0.62, 'y': 0.12, '': 0.1, 'what': 0.09, 'X': 0.03}	5501	9.72068e-09	0.625	0.945183	original		0.02	FALSE	FALSE	FALSE	out-of-context	{}
Mathematics	math_division2	28 is to 14 as 32 is to	16	x	0.62	0	0	{'x': 0.62, 'y': 0.16, 'what': 0.09, '': 0.04, 'X': 0.03}	330	9.98378e-07	0.617187	0.996712	original		0.02	FALSE	FALSE	FALSE	out-of-context	{}
Mathematics	math_division2	22 is to 11 as 76 is to	38	x	0.62	0	0	{'x': 0.62, 'y': 0.12, 'what': 0.11, '': 0.06, 'X': 0.02}	8653	9.1386e-09	0.621094	0.913774	original		0.02	FALSE	FALSE	FALSE	out-of-context	{}
Mathematics	math_division2	4 is to 2 as 76 is to	38	x	0.62	0	0	{'x': 0.62, '': 0.1, 'what': 0.09, 'y': 0.08, 'X': 0.05}	8856	1.35624e-08	0.621094	0.911751	original		0.02	FALSE	FALSE	FALSE	out-of-context	{}
Mathematics	math_division2	6 is to 3 as 26 is to	13	x	0.62	0	0	{'x': 0.62, 'y': 0.16, 'what': 0.09, '': 0.05, 'X': 0.03}	1781	8.70787e-08	0.621094	0.982252	original		0.02	FALSE	FALSE	FALSE	out-of-context	{}
Mathematics	math_division2	6 is to 3 as 76 is to	38	x	0.62	0	0	{'x': 0.62, 'y': 0.12, 'what': 0.09, '': 0.08, 'X': 0.03}	11771	6.51926e-09	0.621094	0.882703	original		0.02	FALSE	FALSE	FALSE	out-of-context	{}
Mathematics	math_division2	12 is to 6 as 26 is to	13	x	0.62	0	0	{'x': 0.62, 'y': 0.17, '': 0.08, 'what': 0.07, 'X': 0.02}	1189	1.00117e-07	0.617187	0.988152	original		0.02	FALSE	FALSE	FALSE	out-of-context	{}
Mathematics	math_division5	75 is to 15 as 85 is to	17	x	0.62	0	0	{'x': 0.62, 'what': 0.11, 'y': 0.1, '': 0.07, 'X': 0.04}	2596	3.39933e-08	0.621094	0.974131	original		0.02	FALSE	FALSE	FALSE	out-of-context	{}
Mathematics	math_division2	86 is to 43 as 80 is to	40	x	0.62	0	0	{'x': 0.62, 'y': 0.19, 'what': 0.04, '\\(': 0.04, 'X': 0.03}	2590	4.63333e-08	0.621094	0.974191	original		0.02	FALSE	FALSE	FALSE	out-of-context	{}
Mathematics	math_division2	86 is to 43 as 96 is to	48	x	0.62	0	0	{'x': 0.62, 'y': 0.24, 'what': 0.03, '\\(': 0.03, 'X': 0.02}	2359	3.07336e-08	0.617187	0.976493	original		0.02	FALSE	FALSE	FALSE	out-of-context	{}
Mathematics	math_double	36 is to 72 as 16 is to	32	x	0.61	0	0	{'x': 0.61, 'what': 0.12, '': 0.1, 'y': 0.09, 'X': 0.02}	1920	6.84522e-08	0.609375	0.980867	original		0.02	FALSE	FALSE	FALSE	out-of-context	{}
Mathematics	math_double	40 is to 80 as 30 is to	60	x	0.61	0	0	{'x': 0.61, 'y': 0.17, 'what': 0.07, '': 0.07, 'X': 0.03}	505	3.25963e-07	0.609375	0.994968	original		0.02	FALSE	FALSE	FALSE	out-of-context	{}
Mathematics	math_double	35 is to 70 as 16 is to	32	x	0.61	0	0	{'x': 0.61, '': 0.17, 'y': 0.08, 'what': 0.06, 'X': 0.03}	2652	3.88827e-08	0.605469	0.973573	original		0.02	FALSE	FALSE	FALSE	out-of-context	{}
Mathematics	math_double	34 is to 68 as 16 is to	32	x	0.61	0	0	{'x': 0.61, 'y': 0.17, 'what': 0.08, '': 0.06, '\\(': 0.02}	2267	9.0804e-08	0.605469	0.97741	original		0.02	FALSE	FALSE	FALSE	out-of-context	{}
Mathematics	math_double	80 is to 160 as 72 is to	144	x	0.61	0	0	{'x': 0.61, 'y': 0.11, 'what': 0.1, '': 0.09, 'X': 0.04}	5634	1.15251e-08	0.609375	0.943858	original		0.02	FALSE	FALSE	FALSE	out-of-context	{}
Mathematics	math_double	100 is to 200 as 16 is to	32	x	0.61	0	0	{'x': 0.61, '': 0.17, 'what': 0.08, 'X': 0.06, 'y': 0.04}	2062	3.84171e-08	0.609375	0.979452	original		0.02	FALSE	FALSE	FALSE	out-of-context	{}
Mathematics	math_double	90 is to 180 as 85 is to	170	x	0.61	0	0	{'x': 0.61, 'y': 0.11, 'what': 0.11, '': 0.08, 'X': 0.03}	1413	9.35979e-08	0.605469	0.98592	original		0.02	FALSE	FALSE	FALSE	out-of-context	{}
Mathematics	math_double	95 is to 190 as 28 is to	56	x	0.61	0	0	{'x': 0.61, 'y': 0.11, 'what': 0.09, '': 0.08, '\\(': 0.03}	5321	1.88593e-08	0.605469	0.946977	original		0.02	FALSE	FALSE	FALSE	out-of-context	{}
Mathematics	math_double	95 is to 190 as 72 is to	144	x	0.61	0	0	{'x': 0.61, 'y': 0.15, 'what': 0.09, '\\(': 0.05, '': 0.05}	8330	9.8953e-09	0.605469	0.916992	original		0.02	FALSE	FALSE	FALSE	out-of-context	{}
Mathematics	math_double	60 is to 120 as 52 is to	104	x	0.61	0	0	{'x': 0.61, 'y': 0.14, 'what': 0.08, '': 0.07, 'X': 0.04}	6858	5.50062e-09	0.613281	0.931661	original		0.02	FALSE	FALSE	FALSE	out-of-context	{}
Mathematics	math_double	65 is to 130 as 72 is to	144	x	0.61	0	0	{'x': 0.61, 'y': 0.2, 'what': 0.07, '\\(': 0.04, '': 0.03}	6272	8.26549e-09	0.609375	0.9375	original		0.02	FALSE	FALSE	FALSE	out-of-context	{}
Mathematics	math_division2	32 is to 16 as 64 is to	32	x	0.61	0	0	{'x': 0.61, 'y': 0.11, 'what': 0.09, '': 0.07, 'X': 0.04}	1961	1.25729e-07	0.613281	0.980459	original		0.02	FALSE	FALSE	FALSE	out-of-context	{}
Mathematics	math_division2	38 is to 19 as 80 is to	40	x	0.61	0	0	{'x': 0.61, 'y': 0.19, 'what': 0.07, 'X': 0.04, '': 0.03}	1654	8.47504e-08	0.605469	0.983518	original		0.02	FALSE	FALSE	FALSE	out-of-context	{}
Mathematics	math_division2	36 is to 18 as 62 is to	31	x	0.61	0	0	{'x': 0.61, 'y': 0.14, '': 0.1, 'what': 0.08, 'X': 0.03}	6214	7.10133e-09	0.605469	0.938078	original		0.02	FALSE	FALSE	FALSE	out-of-context	{}
Mathematics	math_division2	52 is to 26 as 80 is to	40	x	0.61	0	0	{'x': 0.61, 'y': 0.18, 'what': 0.09, 'X': 0.03, '\\(': 0.03}	1380	7.35745e-08	0.613281	0.986248	original		0.02	FALSE	FALSE	FALSE	out-of-context	{}
Mathematics	math_division2	40 is to 20 as 46 is to	23	x	0.61	0	0	{'x': 0.61, 'y': 0.12, '': 0.11, 'what': 0.08, 'X': 0.04}	2427	3.67872e-08	0.609375	0.975815	original		0.02	FALSE	FALSE	FALSE	out-of-context	{}
Mathematics	math_division2	46 is to 23 as 80 is to	40	x	0.61	0	0	{'x': 0.61, 'y': 0.21, 'what': 0.05, '\\(': 0.03, 'X': 0.03}	1887	5.12227e-08	0.609375	0.981196	original		0.02	FALSE	FALSE	FALSE	out-of-context	{}
Mathematics	math_division2	48 is to 24 as 64 is to	32	x	0.61	0	0	{'x': 0.61, 'y': 0.16, 'what': 0.1, '': 0.05, '\\(': 0.02}	3362	3.28291e-08	0.605469	0.966498	original		0.02	FALSE	FALSE	FALSE	out-of-context	{}
Mathematics	math_division2	16 is to 8 as 94 is to	47	x	0.61	0	0	{'x': 0.61, 'y': 0.13, '': 0.11, 'what': 0.08, 'X': 0.02}	3800	3.21306e-08	0.605469	0.962133	original		0.02	FALSE	FALSE	FALSE	out-of-context	{}
Mathematics	math_division2	16 is to 8 as 76 is to	38	x	0.61	0	0	{'x': 0.61, 'y': 0.13, 'what': 0.12, '': 0.08, 'X': 0.02}	8521	7.97445e-09	0.609375	0.915089	original		0.02	FALSE	FALSE	FALSE	out-of-context	{}
Mathematics	math_division2	16 is to 8 as 64 is to	32	x	0.61	0	0	{'x': 0.61, 'y': 0.19, 'what': 0.09, '': 0.04, 'X': 0.02}	3862	2.71248e-08	0.605469	0.961515	original		0.02	FALSE	FALSE	FALSE	out-of-context	{}
Mathematics	math_division2	22 is to 11 as 64 is to	32	x	0.61	0	0	{'x': 0.61, 'y': 0.16, 'what': 0.08, '': 0.04, '\\(': 0.02}	5821	2.2701e-08	0.613281	0.941994	original		0.02	FALSE	FALSE	FALSE	out-of-context	{}
Mathematics	math_division2	96 is to 48 as 50 is to	25	x	0.61	0	0	{'x': 0.61, 'y': 0.13, 'what': 0.08, '': 0.08, 'X': 0.03}	1487	1.10827e-07	0.613281	0.985182	original		0.02	FALSE	FALSE	FALSE	out-of-context	{}
Mathematics	math_division2	90 is to 45 as 28 is to	14	x	0.61	0	0	{'x': 0.61, 'y': 0.13, 'what': 0.08, '': 0.08, 'X': 0.03}	1439	9.82545e-08	0.609375	0.98566	original		0.02	FALSE	FALSE	FALSE	out-of-context	{}
Mathematics	math_division2	80 is to 40 as 58 is to	29	x	0.61	0	0	{'x': 0.61, 'y': 0.12, '': 0.12, 'what': 0.07, 'X': 0.03}	4808	1.52504e-08	0.605469	0.952089	original		0.02	FALSE	FALSE	FALSE	out-of-context	{}
Mathematics	math_double	35 is to 70 as 28 is to	56	x	0.6	0	0	{'x': 0.6, 'y': 0.16, 'what': 0.09, '': 0.06, '\\(': 0.03}	3064	2.25846e-08	0.597656	0.969467	original		0.02	FALSE	FALSE	FALSE	out-of-context	{}
Mathematics	math_double	6 is to 12 as 85 is to	170	x	0.6	0	0	{'x': 0.6, 'y': 0.12, 'what': 0.09, '': 0.08, 'X': 0.05}	6848	1.45519e-08	0.597656	0.93176	original		0.02	FALSE	FALSE	FALSE	out-of-context	{}
Mathematics	math_double	12 is to 24 as 20 is to	40	x	0.6	0	0	{'x': 0.6, 'what': 0.14, 'y': 0.12, '': 0.06, 'X': 0.04}	775	1.67638e-07	0.601562	0.992277	original		0.02	FALSE	FALSE	FALSE	out-of-context	{}
Mathematics	math_division2	32 is to 16 as 60 is to	30	x	0.6	0	0	{'x': 0.6, 'what': 0.14, 'y': 0.09, '': 0.07, 'X': 0.04}	1795	1.06636e-07	0.601562	0.982113	original		0.02	FALSE	FALSE	FALSE	out-of-context	{}
Mathematics	math_division2	24 is to 12 as 34 is to	17	x	0.6	0	0	{'x': 0.6, 'what': 0.16, 'y': 0.09, '': 0.07, 'X': 0.02}	1114	1.28523e-07	0.601562	0.988899	original		0.02	FALSE	FALSE	FALSE	out-of-context	{}
Mathematics	math_division2	56 is to 28 as 80 is to	40	x	0.6	0	0	{'x': 0.6, 'y': 0.19, 'what': 0.09, '': 0.04, '\\(': 0.02}	1132	8.6613e-08	0.597656	0.98872	original		0.02	FALSE	FALSE	FALSE	out-of-context	{}
Mathematics	math_division2	46 is to 23 as 96 is to	48	x	0.6	0	0	{'x': 0.6, 'y': 0.21, 'what': 0.06, 'X': 0.03, '': 0.03}	2522	2.89874e-08	0.601562	0.974868	original		0.02	FALSE	FALSE	FALSE	out-of-context	{}
Mathematics	math_squares	6 is to 36 as 25 is to	625	x	0.6	0	0	{'x': 0.6, 'what': 0.13, 'y': 0.12, '': 0.05, 'X': 0.04}	13098	4.30737e-09	0.601562	0.869479	original		0.02	FALSE	FALSE	FALSE	out-of-context	{}
Mathematics	math_division2	6 is to 3 as 46 is to	23	x	0.6	0	0	{'x': 0.6, 'y': 0.12, 'what': 0.11, '': 0.08, 'X': 0.03}	3625	3.79514e-08	0.601562	0.963877	original		0.02	FALSE	FALSE	FALSE	out-of-context	{}
Mathematics	math_double	5 is to 10 as 20 is to	40	x	0.6	0	0	{'x': 0.6, 'y': 0.15, 'what': 0.12, 'X': 0.04, '': 0.03}	834	1.44355e-07	0.597656	0.991689	original		0.02	FALSE	FALSE	FALSE	out-of-context	{}
Mathematics	math_division2	60 is to 30 as 76 is to	38	x	0.6	0	0	{'x': 0.6, 'y': 0.17, 'what': 0.09, '': 0.07, 'X': 0.04}	6148	5.82077e-09	0.601562	0.938736	original		0.02	FALSE	FALSE	FALSE	out-of-context	{}
Mathematics	math_double	35 is to 70 as 85 is to	170	x	0.59	0	0	{'x': 0.59, 'y': 0.15, 'what': 0.09, '': 0.07, '\\(': 0.03}	1889	4.5402e-08	0.589844	0.981176	original		0.02	FALSE	FALSE	FALSE	out-of-context	{}
Mathematics	math_double	30 is to 60 as 56 is to	112	x	0.59	0	0	{'x': 0.59, 'y': 0.13, '': 0.1, 'what': 0.09, 'X': 0.04}	8720	5.03496e-09	0.59375	0.913106	original		0.02	FALSE	FALSE	FALSE	out-of-context	{}
Mathematics	math_double	50 is to 100 as 16 is to	32	x	0.59	0	0	{'x': 0.59, '': 0.15, 'y': 0.08, 'what': 0.08, 'X': 0.04}	4113	2.11876e-08	0.585937	0.959014	original		0.02	FALSE	FALSE	FALSE	out-of-context	{}
Mathematics	math_double	50 is to 100 as 85 is to	170	x	0.59	0	0	{'x': 0.59, 'what': 0.13, 'y': 0.09, '': 0.08, 'X': 0.05}	2407	3.67872e-08	0.589844	0.976014	original		0.02	FALSE	FALSE	FALSE	out-of-context	{}
Mathematics	math_double	12 is to 24 as 65 is to	130	x	0.59	0	0	{'x': 0.59, '': 0.12, 'what': 0.1, 'y': 0.08, 'X': 0.06}	5541	1.35042e-08	0.585937	0.944784	original		0.02	FALSE	FALSE	FALSE	out-of-context	{}
Mathematics	math_double	85 is to 170 as 20 is to	40	x	0.59	0	0	{'x': 0.59, 'what': 0.12, '': 0.11, 'y': 0.09, 'X': 0.04}	980	2.06754e-07	0.589844	0.990234	original		0.02	FALSE	FALSE	FALSE	out-of-context	{}
Mathematics	math_double	90 is to 180 as 16 is to	32	x	0.59	0	0	{'x': 0.59, '': 0.15, 'what': 0.08, 'y': 0.08, 'X': 0.04}	2863	3.79514e-08	0.59375	0.97147	original		0.02	FALSE	FALSE	FALSE	out-of-context	{}
Mathematics	math_double	65 is to 130 as 16 is to	32	x	0.59	0	0	{'x': 0.59, '': 0.15, 'what': 0.09, 'y': 0.09, 'X': 0.04}	3124	2.09548e-08	0.59375	0.96887	original		0.02	FALSE	FALSE	FALSE	out-of-context	{}
Mathematics	math_double	65 is to 130 as 85 is to	170	x	0.59	0	0	{'x': 0.59, 'y': 0.13, 'what': 0.12, '': 0.07, '\\(': 0.03}	857	1.13621e-07	0.59375	0.99146	original		0.02	FALSE	FALSE	FALSE	out-of-context	{}
Mathematics	math_division2	32 is to 16 as 76 is to	38	x	0.59	0	0	{'x': 0.59, 'what': 0.15, '': 0.09, 'y': 0.07, 'X': 0.05}	6026	1.50176e-08	0.589844	0.939951	original		0.02	FALSE	FALSE	FALSE	out-of-context	{}
Mathematics	math_division2	54 is to 27 as 80 is to	40	x	0.59	0	0	{'x': 0.59, 'y': 0.21, 'what': 0.07, '': 0.04, '\\(': 0.03}	1647	6.23986e-08	0.585937	0.983588	original		0.02	FALSE	FALSE	FALSE	out-of-context	{}
Mathematics	math_division2	42 is to 21 as 80 is to	40	x	0.59	0	0	{'x': 0.59, 'y': 0.2, 'what': 0.08, '\\(': 0.04, '': 0.04}	2353	4.1211e-08	0.585937	0.976553	original		0.02	FALSE	FALSE	FALSE	out-of-context	{}
Mathematics	math_division2	48 is to 24 as 62 is to	31	x	0.59	0	0	{'x': 0.59, 'y': 0.13, 'what': 0.11, '': 0.08, 'X': 0.03}	6187	1.13505e-08	0.589844	0.938347	original		0.02	FALSE	FALSE	FALSE	out-of-context	{}
Mathematics	math_division2	48 is to 24 as 50 is to	25	x	0.59	0	0	{'x': 0.59, 'y': 0.15, 'what': 0.07, '': 0.06, 'X': 0.04}	1779	1.20141e-07	0.585937	0.982272	original		0.02	FALSE	FALSE	FALSE	out-of-context	{}
Mathematics	math_squares	25 is to 625 as 5 is to	25	x	0.59	0	0	{'x': 0.59, '': 0.16, 'what': 0.11, 'X': 0.04, 'y': 0.03}	651	4.32134e-07	0.589843	0.993513	original		0.02	FALSE	FALSE	FALSE	out-of-context	{}
Mathematics	math_division2	18 is to 9 as 76 is to	38	x	0.59	0	0	{'x': 0.59, 'y': 0.16, 'what': 0.1, '': 0.06, 'X': 0.03}	8446	7.13044e-09	0.589844	0.915836	original		0.02	FALSE	FALSE	FALSE	out-of-context	{}
Mathematics	math_division2	12 is to 6 as 46 is to	23	x	0.59	0	0	{'x': 0.59, 'y': 0.14, '': 0.11, 'what': 0.08, 'X': 0.03}	2961	3.51574e-08	0.589844	0.970494	original		0.02	FALSE	FALSE	FALSE	out-of-context	{}
Mathematics	math_double	2 is to 4 as 20 is to	40	x	0.59	0	0	{'x': 0.59, 'y': 0.11, 'what': 0.09, 'X': 0.08, '': 0.07}	1327	1.38767e-07	0.589844	0.986777	original		0.02	FALSE	FALSE	FALSE	out-of-context	{}
Mathematics	math_division5	55 is to 11 as 100 is to	20	x	0.59	0	0	{'x': 0.59, 'what': 0.12, 'y': 0.11, '': 0.07, '\\(': 0.03}	2257	1.00583e-07	0.585937	0.977509	original		0.02	FALSE	FALSE	FALSE	out-of-context	{}
Mathematics	math_division2	72 is to 36 as 76 is to	38	x	0.59	0	0	{'x': 0.59, 'y': 0.15, 'what': 0.11, '': 0.07, '\\(': 0.03}	6914	9.60426e-09	0.585937	0.931103	original		0.02	FALSE	FALSE	FALSE	out-of-context	{}
Mathematics	math_division2	86 is to 43 as 76 is to	38	x	0.59	0	0	{'x': 0.59, 'y': 0.2, 'what': 0.06, '': 0.05, 'X': 0.03}	7124	7.97445e-09	0.585937	0.92901	original		0.02	FALSE	FALSE	FALSE	out-of-context	{}
Mathematics	math_double	40 is to 80 as 56 is to	112	x	0.58	0	0	{'x': 0.58, 'y': 0.15, '': 0.1, 'what': 0.09, 'X': 0.04}	6785	8.44011e-09	0.582031	0.932388	original		0.02	FALSE	FALSE	FALSE	out-of-context	{}
Mathematics	math_double	52 is to 104 as 24 is to	48	x	0.58	0	0	{'x': 0.58, 'what': 0.18, 'X': 0.06, 'y': 0.06, '': 0.05}	1130	1.57394e-07	0.582031	0.98874	original		0.02	FALSE	FALSE	FALSE	out-of-context	{}
Mathematics	math_double	52 is to 104 as 28 is to	56	x	0.58	0	0	{'x': 0.58, 'what': 0.18, 'y': 0.08, '': 0.06, 'X': 0.05}	1548	8.98726e-08	0.582031	0.984574	original		0.02	FALSE	FALSE	FALSE	out-of-context	{}
Mathematics	math_double	72 is to 144 as 28 is to	56	x	0.58	0	0	{'x': 0.58, 'what': 0.16, 'y': 0.09, '': 0.09, 'X': 0.02}	2294	4.63333e-08	0.582031	0.97714	original		0.02	FALSE	FALSE	FALSE	out-of-context	{}
Mathematics	math_division2	34 is to 17 as 46 is to	23	x	0.58	0	0	{'x': 0.58, 'y': 0.18, '': 0.07, 'what': 0.06, 'X': 0.03}	1001	2.02097e-07	0.582031	0.990025	original		0.02	FALSE	FALSE	FALSE	out-of-context	{}
Mathematics	math_division2	38 is to 19 as 76 is to	38	x	0.58	0	0	{'x': 0.58, 'y': 0.16, 'what': 0.11, 'X': 0.05, '': 0.05}	3964	2.11876e-08	0.578125	0.960499	original		0.02	FALSE	FALSE	FALSE	out-of-context	{}
Mathematics	math_division2	38 is to 19 as 70 is to	35	x	0.58	0	0	{'x': 0.58, 'y': 0.2, 'what': 0.07, 'X': 0.04, '': 0.04}	4246	2.5495e-08	0.582031	0.957689	original		0.02	FALSE	FALSE	FALSE	out-of-context	{}
Mathematics	math_division2	6 is to 3 as 62 is to	31	x	0.58	0	0	{'x': 0.58, 'y': 0.14, 'what': 0.11, '': 0.08, 'X': 0.03}	8250	1.26893e-08	0.582031	0.917789	original		0.02	FALSE	FALSE	FALSE	out-of-context	{}
Mathematics	math_division2	86 is to 43 as 64 is to	32	x	0.58	0	0	{'x': 0.58, 'y': 0.22, 'what': 0.05, '': 0.03, 'X': 0.03}	4741	1.61817e-08	0.582031	0.952756	original		0.02	FALSE	FALSE	FALSE	out-of-context	{}
Mathematics	math_division2	86 is to 43 as 34 is to	17	x	0.58	0	0	{'x': 0.58, 'y': 0.19, 'what': 0.07, '': 0.05, '\\(': 0.03}	1939	5.44824e-08	0.582031	0.980678	original		0.02	FALSE	FALSE	FALSE	out-of-context	{}
Mathematics	math_division2	80 is to 40 as 46 is to	23	x	0.58	0	0	{'x': 0.58, '': 0.16, 'y': 0.11, 'what': 0.06, 'X': 0.04}	4404	1.95578e-08	0.578125	0.956114	original		0.02	FALSE	FALSE	FALSE	out-of-context	{}
Mathematics	math_double	35 is to 70 as 72 is to	144	x	0.57	0	0	{'x': 0.57, 'y': 0.23, 'what': 0.08, '\\(': 0.04, '': 0.03}	7597	7.45058e-09	0.566406	0.924296	original		0.02	FALSE	FALSE	FALSE	out-of-context	{}
Mathematics	math_double	45 is to 90 as 30 is to	60	x	0.57	0	0	{'x': 0.57, 'y': 0.16, 'what': 0.12, '': 0.05, '\\(': 0.03}	625	2.21655e-07	0.570312	0.993772	original		0.02	FALSE	FALSE	FALSE	out-of-context	{}
Mathematics	math_double	8 is to 16 as 16 is to	32		0.57	0	0	{'': 0.57, 'x': 0.14, 'what': 0.06, 'X': 0.05, 'y': 0.03}	864	1.60933e-06	0.570311	0.99139	original		0.02	FALSE	FALSE	FALSE	out-of-context	{}
Mathematics	math_double	20 is to 40 as 85 is to	170	x	0.57	0	0	{'x': 0.57, '': 0.13, 'y': 0.11, 'what': 0.09, 'X': 0.05}	1574	5.30854e-08	0.574219	0.984315	original		0.02	FALSE	FALSE	FALSE	out-of-context	{}
Mathematics	math_double	84 is to 168 as 20 is to	40	x	0.57	0	0	{'x': 0.57, 'what': 0.12, '': 0.12, 'y': 0.07, 'X': 0.07}	914	2.19792e-07	0.574219	0.990892	original		0.02	FALSE	FALSE	FALSE	out-of-context	{}
Mathematics	math_double	95 is to 190 as 16 is to	32	x	0.57	0	0	{'x': 0.57, '': 0.16, 'what': 0.08, 'y': 0.07, 'X': 0.04}	5389	2.89874e-08	0.570312	0.946299	original		0.02	FALSE	FALSE	FALSE	out-of-context	{}
Mathematics	math_double	72 is to 144 as 16 is to	32	x	0.57	0	0	{'x': 0.57, '': 0.13, 'what': 0.12, 'y': 0.09, 'X': 0.02}	3323	3.72529e-08	0.574219	0.966887	original		0.02	FALSE	FALSE	FALSE	out-of-context	{}
Mathematics	math_division2	32 is to 16 as 94 is to	47	x	0.57	0	0	{'x': 0.57, 'what': 0.13, '': 0.11, 'y': 0.08, 'X': 0.04}	3642	3.95812e-08	0.570312	0.963708	original		0.02	FALSE	FALSE	FALSE	out-of-context	{}
Mathematics	math_division2	26 is to 13 as 46 is to	23	x	0.57	0	0	{'x': 0.57, 'y': 0.15, 'what': 0.1, '': 0.07, 'X': 0.04}	1503	9.63919e-08	0.574219	0.985023	original		0.02	FALSE	FALSE	FALSE	out-of-context	{}
Mathematics	math_division2	48 is to 24 as 34 is to	17	x	0.57	0	0	{'x': 0.57, 'what': 0.17, 'y': 0.1, '': 0.08, 'X': 0.03}	2094	7.07805e-08	0.566406	0.979133	original		0.02	FALSE	FALSE	FALSE	out-of-context	{}
Mathematics	math_division2	46 is to 23 as 70 is to	35	x	0.57	0	0	{'x': 0.57, 'y': 0.23, 'what': 0.06, '\\(': 0.04, '': 0.03}	4305	1.75787e-08	0.570312	0.957101	original		0.02	FALSE	FALSE	FALSE	out-of-context	{}
Mathematics	math_division2	4 is to 2 as 94 is to	47	x	0.57	0	0	{'x': 0.57, '': 0.12, 'y': 0.1, 'what': 0.08, 'X': 0.04}	4029	5.89062e-08	0.574219	0.959851	original		0.02	FALSE	FALSE	FALSE	out-of-context	{}
Mathematics	math_squares	10 is to 100 as 25 is to	625	x	0.57	0	0	{'x': 0.57, 'y': 0.13, 'what': 0.12, 'X': 0.07, '': 0.03}	10103	4.5402e-09	0.570312	0.899324	original		0.02	FALSE	FALSE	FALSE	out-of-context	{}
Mathematics	math_squares	18 is to 324 as 25 is to	625	x	0.57	0	0	{'x': 0.57, 'what': 0.18, 'y': 0.1, '': 0.06, 'X': 0.03}	6681	1.3737e-08	0.566406	0.933424	original		0.02	FALSE	FALSE	FALSE	out-of-context	{}
Mathematics	math_division2	96 is to 48 as 26 is to	13	x	0.57	0	0	{'x': 0.57, 'y': 0.13, '': 0.11, 'what': 0.09, 'X': 0.03}	3265	5.09899e-08	0.574219	0.967465	original		0.02	FALSE	FALSE	FALSE	out-of-context	{}
Mathematics	math_division2	86 is to 43 as 62 is to	31	x	0.57	0	0	{'x': 0.57, 'y': 0.2, 'what': 0.06, '': 0.05, 'X': 0.03}	4657	1.3446e-08	0.574219	0.953593	original		0.02	FALSE	FALSE	FALSE	out-of-context	{}
Mathematics	math_division2	78 is to 39 as 26 is to	13	x	0.57	0	0	{'x': 0.57, 'y': 0.15, 'what': 0.1, '': 0.09, 'X': 0.02}	1731	9.26666e-08	0.570312	0.982751	original		0.02	FALSE	FALSE	FALSE	out-of-context	{}
Mathematics	math_division2	74 is to 37 as 96 is to	48	x	0.57	0	0	{'x': 0.57, 'y': 0.23, 'what': 0.06, 'X': 0.03, '': 0.03}	2302	3.86499e-08	0.570312	0.977061	original		0.02	FALSE	FALSE	FALSE	out-of-context	{}
Mathematics	math_double	38 is to 76 as 20 is to	40	x	0.56	0	0	{'x': 0.56, 'what': 0.15, 'y': 0.1, '': 0.08, 'X': 0.05}	710	3.37139e-07	0.558593	0.992925	original		0.02	FALSE	FALSE	FALSE	out-of-context	{}
Mathematics	math_double	36 is to 72 as 56 is to	112	x	0.56	0	0	{'x': 0.56, 'what': 0.16, 'y': 0.14, '': 0.06, 'X': 0.02}	8434	5.64614e-09	0.558594	0.915956	original		0.02	FALSE	FALSE	FALSE	out-of-context	{}
Mathematics	math_double	80 is to 160 as 85 is to	170	x	0.56	0	0	{'x': 0.56, '': 0.17, 'y': 0.09, 'what': 0.09, 'X': 0.04}	662	2.49594e-07	0.5625	0.993403	original		0.02	FALSE	FALSE	FALSE	out-of-context	{}
Mathematics	math_double	78 is to 156 as 20 is to	40	x	0.56	0	0	{'x': 0.56, 'what': 0.17, '': 0.11, 'y': 0.07, 'X': 0.05}	1088	1.38767e-07	0.5625	0.989158	original		0.02	FALSE	FALSE	FALSE	out-of-context	{}
Mathematics	math_double	96 is to 192 as 24 is to	48	x	0.56	0	0	{'x': 0.56, 'what': 0.16, 'y': 0.08, '': 0.08, '\\(': 0.03}	1536	1.01514e-07	0.5625	0.984694	original		0.02	FALSE	FALSE	FALSE	out-of-context	{}
Mathematics	math_double	70 is to 140 as 16 is to	32	x	0.56	0	0	{'x': 0.56, '': 0.24, 'what': 0.06, 'y': 0.05, 'X': 0.04}	3547	2.38651e-08	0.5625	0.964654	original		0.02	FALSE	FALSE	FALSE	out-of-context	{}
Mathematics	math_division2	36 is to 18 as 46 is to	23	x	0.56	0	0	{'x': 0.56, '': 0.14, 'y': 0.13, 'what': 0.09, 'X': 0.03}	1767	5.54137e-08	0.558594	0.982392	original		0.02	FALSE	FALSE	FALSE	out-of-context	{}
Mathematics	math_division2	44 is to 22 as 80 is to	40	x	0.56	0	0	{'x': 0.56, 'y': 0.2, 'what': 0.12, '': 0.04, '\\(': 0.03}	1893	6.37956e-08	0.558594	0.981136	original		0.02	FALSE	FALSE	FALSE	out-of-context	{}
Mathematics	math_squares	22 is to 484 as 26 is to	676	x	0.56	0	0	{'x': 0.56, 'what': 0.19, 'y': 0.11, '': 0.05, 'X': 0.04}	11673	6.51926e-09	0.558594	0.883679	original		0.02	FALSE	FALSE	FALSE	out-of-context	{}
Mathematics	math_cubes	6 is to 216 as 8 is to	512	x	0.56	0	0	{'x': 0.56, 'what': 0.19, '': 0.08, 'y': 0.08, 'X': 0.03}	6469	2.38651e-08	0.558594	0.935537	original		0.02	FALSE	FALSE	FALSE	out-of-context	{}
Mathematics	math_squares	5 is to 25 as 12 is to	144	x	0.56	0	0	{'x': 0.56, 'what': 0.15, 'y': 0.13, '': 0.06, 'X': 0.05}	6672	7.74162e-09	0.5625	0.933514	original		0.02	FALSE	FALSE	FALSE	out-of-context	{}
Mathematics	math_division2	16 is to 8 as 62 is to	31	x	0.56	0	0	{'x': 0.56, 'y': 0.15, 'what': 0.12, '': 0.1, 'X': 0.03}	6190	1.44937e-08	0.558594	0.938317	original		0.02	FALSE	FALSE	FALSE	out-of-context	{}
Mathematics	math_division2	94 is to 47 as 26 is to	13	x	0.56	0	0	{'x': 0.56, 'y': 0.15, 'what': 0.1, '': 0.08, 'X': 0.03}	2063	8.14907e-08	0.5625	0.979442	original		0.02	FALSE	FALSE	FALSE	out-of-context	{}
Mathematics	math_division2	96 is to 48 as 76 is to	38	x	0.56	0	0	{'x': 0.56, 'y': 0.14, 'what': 0.13, '': 0.09, 'X': 0.02}	6817	1.14669e-08	0.558594	0.932069	original		0.02	FALSE	FALSE	FALSE	out-of-context	{}
Mathematics	math_division2	60 is to 30 as 70 is to	35	x	0.56	0	0	{'x': 0.56, 'y': 0.22, 'what': 0.08, '': 0.06, 'X': 0.03}	1281	6.0536e-08	0.558594	0.987235	original		0.02	FALSE	FALSE	FALSE	out-of-context	{}
Mathematics	math_division2	88 is to 44 as 26 is to	13	x	0.56	0	0	{'x': 0.56, 'y': 0.13, '': 0.11, 'what': 0.1, '\\(': 0.02}	1739	1.51806e-07	0.5625	0.982671	original		0.02	FALSE	FALSE	FALSE	out-of-context	{}
Mathematics	math_division2	90 is to 45 as 46 is to	23	x	0.56	0	0	{'x': 0.56, 'y': 0.13, '': 0.11, 'what': 0.07, 'X': 0.04}	4321	2.38651e-08	0.558594	0.956942	original		0.02	FALSE	FALSE	FALSE	out-of-context	{}
Mathematics	math_division2	76 is to 38 as 96 is to	48	x	0.56	0	0	{'x': 0.56, 'y': 0.27, 'what': 0.07, '': 0.03, '\\(': 0.02}	1778	5.00586e-08	0.5625	0.982282	original		0.02	FALSE	FALSE	FALSE	out-of-context	{}
Mathematics	math_double	54 is to 108 as 20 is to	40	x	0.55	0	0	{'x': 0.55, 'what': 0.17, '': 0.11, 'y': 0.09, 'X': 0.04}	976	1.77883e-07	0.546875	0.990274	original		0.02	FALSE	FALSE	FALSE	out-of-context	{}
Mathematics	math_double	12 is to 24 as 85 is to	170	x	0.55	0	0	{'x': 0.55, 'what': 0.16, '': 0.12, 'y': 0.08, 'X': 0.04}	4584	1.88593e-08	0.546875	0.954321	original		0.02	FALSE	FALSE	FALSE	out-of-context	{}
Mathematics	math_double	24 is to 48 as 85 is to	170	x	0.55	0	0	{'x': 0.55, 'what': 0.14, '': 0.11, 'y': 0.09, 'X': 0.05}	3859	2.84053e-08	0.546875	0.961545	original		0.02	FALSE	FALSE	FALSE	out-of-context	{}
Mathematics	math_double	26 is to 52 as 85 is to	170	x	0.55	0	0	{'x': 0.55, 'y': 0.13, 'what': 0.13, '': 0.06, 'X': 0.06}	2435	7.12462e-08	0.546875	0.975735	original		0.02	FALSE	FALSE	FALSE	out-of-context	{}
Mathematics	math_double	86 is to 172 as 28 is to	56	x	0.55	0	0	{'x': 0.55, 'what': 0.18, 'y': 0.12, '': 0.08, 'X': 0.02}	1274	1.35042e-07	0.554687	0.987305	original		0.02	FALSE	FALSE	FALSE	out-of-context	{}
Mathematics	math_double	80 is to 160 as 16 is to	32	x	0.55	0	0	{'x': 0.55, '': 0.23, 'what': 0.07, 'y': 0.05, 'X': 0.05}	2259	6.14673e-08	0.554687	0.977489	original		0.02	FALSE	FALSE	FALSE	out-of-context	{}
Mathematics	math_double	55 is to 110 as 20 is to	40	x	0.55	0	0	{'x': 0.55, 'what': 0.16, 'y': 0.11, '': 0.09, 'X': 0.03}	509	4.48897e-07	0.546875	0.994928	original		0.02	FALSE	FALSE	FALSE	out-of-context	{}
Mathematics	math_double	74 is to 148 as 20 is to	40	x	0.55	0	0	{'x': 0.55, 'what': 0.21, 'y': 0.08, '': 0.08, 'X': 0.04}	1108	1.11293e-07	0.550781	0.988959	original		0.02	FALSE	FALSE	FALSE	out-of-context	{}
Mathematics	math_division2	32 is to 16 as 46 is to	23	x	0.55	0	0	{'x': 0.55, 'what': 0.12, '': 0.12, 'y': 0.08, 'X': 0.06}	1253	1.70432e-07	0.546875	0.987514	original		0.02	FALSE	FALSE	FALSE	out-of-context	{}
Mathematics	math_division2	44 is to 22 as 2 is to	1	x	0.55	0	0	{'x': 0.55, '': 0.26, 'what': 0.07, 'y': 0.03, 'X': 0.03}	237	5.06639e-06	0.550776	0.997638	original		0.02	FALSE	FALSE	FALSE	out-of-context	{}
Mathematics	math_division2	42 is to 21 as 76 is to	38	x	0.55	0	0	{'x': 0.55, 'y': 0.17, 'what': 0.12, '': 0.07, '\\(': 0.03}	7075	6.78119e-09	0.550781	0.929498	original		0.02	FALSE	FALSE	FALSE	out-of-context	{}
Mathematics	math_squares	4 is to 16 as 25 is to	625	x	0.55	0	0	{'x': 0.55, 'what': 0.13, 'y': 0.12, 'X': 0.07, '': 0.06}	9467	8.3237e-09	0.546875	0.905662	original		0.02	FALSE	FALSE	FALSE	out-of-context	{}
Mathematics	math_division2	16 is to 8 as 26 is to	13	x	0.55	0	0	{'x': 0.55, 'y': 0.23, 'what': 0.1, '': 0.06, 'X': 0.02}	926	1.71363e-07	0.550781	0.990772	original		0.02	FALSE	FALSE	FALSE	out-of-context	{}
Mathematics	math_division2	12 is to 6 as 62 is to	31	x	0.55	0	0	{'x': 0.55, 'y': 0.14, '': 0.13, 'what': 0.09, 'X': 0.02}	8026	1.13505e-08	0.554687	0.920022	original		0.02	FALSE	FALSE	FALSE	out-of-context	{}
Mathematics	math_division2	94 is to 47 as 80 is to	40	x	0.55	0	0	{'x': 0.55, 'y': 0.19, 'what': 0.1, '\\(': 0.04, '': 0.03}	1737	9.26666e-08	0.554687	0.982691	original		0.02	FALSE	FALSE	FALSE	out-of-context	{}
Mathematics	math_double	2 is to 4 as 16 is to	32	x	0.55	0	0	{'x': 0.55, 'y': 0.12, 'what': 0.11, 'X': 0.08, '': 0.07}	3103	4.91273e-08	0.554687	0.969079	original		0.02	FALSE	FALSE	FALSE	out-of-context	{}
Mathematics	math_division2	66 is to 33 as 96 is to	48	x	0.55	0	0	{'x': 0.55, 'y': 0.19, 'what': 0.12, '': 0.05, 'X': 0.03}	2172	6.14673e-08	0.550781	0.978356	original		0.02	FALSE	FALSE	FALSE	out-of-context	{}
Mathematics	math_division2	66 is to 33 as 80 is to	40	x	0.55	0	0	{'x': 0.55, 'y': 0.18, 'what': 0.13, '': 0.04, 'X': 0.03}	1705	8.6613e-08	0.554687	0.98301	original		0.02	FALSE	FALSE	FALSE	out-of-context	{}
Mathematics	math_division2	72 is to 36 as 26 is to	13	x	0.55	0	0	{'x': 0.55, 'y': 0.15, 'what': 0.11, '': 0.11, '\\(': 0.03}	2493	6.42613e-08	0.550781	0.975157	original		0.02	FALSE	FALSE	FALSE	out-of-context	{}
Mathematics	math_division2	84 is to 42 as 50 is to	25	x	0.55	0	0	{'x': 0.55, 'y': 0.19, 'what': 0.11, '': 0.05, '\\(': 0.03}	1571	9.35979e-08	0.550781	0.984345	original		0.02	FALSE	FALSE	FALSE	out-of-context	{}
Mathematics	math_double	54 is to 108 as 2 is to	4	x	0.54	0	0	{'x': 0.54, '': 0.28, 'what': 0.11, 'y': 0.03, 'X': 0.02}	286	1.43796e-06	0.535155	0.99715	original		0.02	FALSE	FALSE	FALSE	out-of-context	{}
Mathematics	math_double	14 is to 28 as 56 is to	112	x	0.54	0	0	{'x': 0.54, 'what': 0.15, 'y': 0.14, 'X': 0.06, '': 0.04}	11037	3.95812e-09	0.539062	0.890017	original		0.02	FALSE	FALSE	FALSE	out-of-context	{}
Mathematics	math_double	14 is to 28 as 85 is to	170	x	0.54	0	0	{'x': 0.54, 'what': 0.15, 'y': 0.1, '': 0.08, 'X': 0.07}	3527	2.73576e-08	0.535156	0.964854	original		0.02	FALSE	FALSE	FALSE	out-of-context	{}
Mathematics	math_double	10 is to 20 as 72 is to	144	x	0.54	0	0	{'x': 0.54, 'what': 0.12, '': 0.11, 'y': 0.11, 'X': 0.06}	4190	2.16532e-08	0.539062	0.958247	original		0.02	FALSE	FALSE	FALSE	out-of-context	{}
Mathematics	math_double	26 is to 52 as 20 is to	40	x	0.54	0	0	{'x': 0.54, 'what': 0.18, 'y': 0.1, 'X': 0.06, '': 0.05}	698	3.81842e-07	0.535156	0.993044	original		0.02	FALSE	FALSE	FALSE	out-of-context	{}
Mathematics	math_double	26 is to 52 as 16 is to	32	x	0.54	0	0	{'x': 0.54, 'what': 0.16, 'y': 0.1, '': 0.09, 'X': 0.05}	1238	1.85333e-07	0.535156	0.987663	original		0.02	FALSE	FALSE	FALSE	out-of-context	{}
Mathematics	math_double	86 is to 172 as 20 is to	40	x	0.54	0	0	{'x': 0.54, 'what': 0.19, '': 0.1, 'y': 0.09, 'X': 0.03}	956	2.22586e-07	0.542969	0.990474	original		0.02	FALSE	FALSE	FALSE	out-of-context	{}
Mathematics	math_double	78 is to 156 as 30 is to	60	x	0.54	0	0	{'x': 0.54, 'what': 0.16, 'y': 0.11, '': 0.11, 'X': 0.04}	1435	9.96515e-08	0.535156	0.9857	original		0.02	FALSE	FALSE	FALSE	out-of-context	{}
Mathematics	math_double	96 is to 192 as 16 is to	32	x	0.54	0	0	{'x': 0.54, '': 0.16, 'what': 0.13, 'y': 0.07, 'the': 0.03}	1038	2.5332e-07	0.535156	0.989656	original		0.02	FALSE	FALSE	FALSE	out-of-context	{}
Mathematics	math_double	62 is to 124 as 20 is to	40	x	0.54	0	0	{'x': 0.54, 'what': 0.18, '': 0.1, 'y': 0.09, 'X': 0.04}	773	2.86847e-07	0.535156	0.992297	original		0.02	FALSE	FALSE	FALSE	out-of-context	{}
Mathematics	math_double	62 is to 124 as 16 is to	32	x	0.54	0	0	{'x': 0.54, 'what': 0.15, '': 0.13, 'y': 0.09, 'X': 0.04}	2582	5.42495e-08	0.539062	0.974271	original		0.02	FALSE	FALSE	FALSE	out-of-context	{}
Mathematics	math_double	58 is to 116 as 20 is to	40	x	0.54	0	0	{'x': 0.54, 'what': 0.2, '': 0.1, 'y': 0.07, 'X': 0.04}	1079	1.66707e-07	0.542969	0.989248	original		0.02	FALSE	FALSE	FALSE	out-of-context	{}
Mathematics	math_double	75 is to 150 as 16 is to	32	x	0.54	0	0	{'x': 0.54, '': 0.2, 'what': 0.09, 'X': 0.05, 'y': 0.04}	5058	1.66474e-08	0.542969	0.949597	original		0.02	FALSE	FALSE	FALSE	out-of-context	{}
Mathematics	math_double	76 is to 152 as 28 is to	56	x	0.54	0	0	{'x': 0.54, 'what': 0.22, 'y': 0.1, '': 0.08, 'X': 0.02}	1502	7.26432e-08	0.539062	0.985033	original		0.02	FALSE	FALSE	FALSE	out-of-context	{}
Mathematics	math_double	76 is to 152 as 20 is to	40	x	0.54	0	0	{'x': 0.54, 'what': 0.2, '': 0.09, 'y': 0.08, 'X': 0.04}	1104	1.51806e-07	0.539062	0.988999	original		0.02	FALSE	FALSE	FALSE	out-of-context	{}
Mathematics	math_double	68 is to 136 as 20 is to	40	x	0.54	0	0	{'x': 0.54, 'what': 0.17, '': 0.13, 'y': 0.06, 'X': 0.05}	525	4.52623e-07	0.539062	0.994768	original		0.02	FALSE	FALSE	FALSE	out-of-context	{}
Mathematics	math_division2	56 is to 28 as 76 is to	38	x	0.54	0	0	{'x': 0.54, 'y': 0.16, 'what': 0.15, '': 0.08, 'X': 0.03}	4333	1.47265e-08	0.539062	0.956822	original		0.02	FALSE	FALSE	FALSE	out-of-context	{}
Mathematics	math_division2	54 is to 27 as 76 is to	38	x	0.54	0	0	{'x': 0.54, 'y': 0.18, 'what': 0.11, '': 0.08, 'X': 0.03}	5444	1.15833e-08	0.542969	0.945751	original		0.02	FALSE	FALSE	FALSE	out-of-context	{}
Mathematics	math_division2	48 is to 24 as 26 is to	13	x	0.54	0	0	{'x': 0.54, 'y': 0.14, 'what': 0.13, '': 0.09, 'X': 0.03}	2780	5.75092e-08	0.535156	0.972298	original		0.02	FALSE	FALSE	FALSE	out-of-context	{}
Mathematics	math_squares	6 is to 36 as 12 is to	144	x	0.54	0	0	{'x': 0.54, 'y': 0.19, 'what': 0.11, '': 0.06, 'X': 0.04}	4814	2.31666e-08	0.542969	0.952029	original		0.02	FALSE	FALSE	FALSE	out-of-context	{}
Mathematics	math_squares	18 is to 324 as 26 is to	676	x	0.54	0	0	{'x': 0.54, 'what': 0.21, 'y': 0.12, '': 0.05, 'X': 0.03}	19362	1.78261e-09	0.539062	0.807059	original		0.02	FALSE	FALSE	FALSE	out-of-context	{}
Mathematics	math_squares	16 is to 256 as 26 is to	676	x	0.54	0	0	{'x': 0.54, 'what': 0.18, 'y': 0.12, '': 0.06, 'X': 0.04}	19677	2.19734e-09	0.535156	0.80392	original		0.02	FALSE	FALSE	FALSE	out-of-context	{}
Mathematics	math_division2	18 is to 9 as 46 is to	23	x	0.54	0	0	{'x': 0.54, 'y': 0.18, 'what': 0.12, '': 0.07, 'X': 0.03}	2629	3.79514e-08	0.542969	0.973802	original		0.02	FALSE	FALSE	FALSE	out-of-context	{}
Mathematics	math_division2	18 is to 9 as 64 is to	32	x	0.54	0	0	{'x': 0.54, 'y': 0.25, 'what': 0.09, '': 0.03, 'X': 0.02}	4709	1.96742e-08	0.539062	0.953075	original		0.02	FALSE	FALSE	FALSE	out-of-context	{}
Mathematics	math_division2	18 is to 9 as 62 is to	31	x	0.54	0	0	{'x': 0.54, 'y': 0.2, 'what': 0.12, '': 0.07, 'X': 0.02}	6898	9.37143e-09	0.535156	0.931262	original		0.02	FALSE	FALSE	FALSE	out-of-context	{}
Mathematics	math_double	5 is to 10 as 28 is to	56	x	0.54	0	0	{'x': 0.54, 'y': 0.18, 'what': 0.14, '': 0.05, 'X': 0.04}	3726	1.96742e-08	0.539062	0.962871	original		0.02	FALSE	FALSE	FALSE	out-of-context	{}
Mathematics	math_double	4 is to 8 as 74 is to	148	x	0.54	0	0	{'x': 0.54, 'what': 0.12, '': 0.12, 'y': 0.09, 'X': 0.05}	11525	1.01863e-08	0.539062	0.885154	original		0.02	FALSE	FALSE	FALSE	out-of-context	{}
Mathematics	math_division2	72 is to 36 as 46 is to	23	x	0.54	0	0	{'x': 0.54, '': 0.15, 'what': 0.12, 'y': 0.11, 'X': 0.02}	3066	3.46918e-08	0.542969	0.969448	original		0.02	FALSE	FALSE	FALSE	out-of-context	{}
Mathematics	math_division2	84 is to 42 as 60 is to	30	x	0.54	0	0	{'x': 0.54, 'y': 0.2, 'what': 0.13, '': 0.03, '\\(': 0.03}	4062	2.468e-08	0.535156	0.959522	original		0.02	FALSE	FALSE	FALSE	out-of-context	{}
Mathematics	math_division2	84 is to 42 as 80 is to	40	x	0.54	0	0	{'x': 0.54, 'y': 0.18, 'what': 0.11, '': 0.04, '\\(': 0.03}	2415	7.91624e-08	0.542969	0.975935	original		0.02	FALSE	FALSE	FALSE	out-of-context	{}
Mathematics	math_double	36 is to 72 as 28 is to	56	x	0.53	0	0	{'x': 0.53, 'what': 0.18, 'y': 0.15, '': 0.06, '\\(': 0.03}	2145	4.47035e-08	0.527344	0.978625	original		0.02	FALSE	FALSE	FALSE	out-of-context	{}
Mathematics	math_double	45 is to 90 as 28 is to	56	x	0.53	0	0	{'x': 0.53, 'what': 0.17, 'y': 0.13, '': 0.08, '\\(': 0.03}	2003	4.2608e-08	0.53125	0.98004	original		0.02	FALSE	FALSE	FALSE	out-of-context	{}
Mathematics	math_double	12 is to 24 as 28 is to	56	x	0.53	0	0	{'x': 0.53, 'y': 0.16, 'what': 0.15, '': 0.06, 'X': 0.04}	2532	3.32948e-08	0.527344	0.974769	original		0.02	FALSE	FALSE	FALSE	out-of-context	{}
Mathematics	math_double	20 is to 40 as 30 is to	60	x	0.53	0	0	{'x': 0.53, 'y': 0.21, '': 0.1, 'what': 0.08, 'X': 0.04}	309	5.81145e-07	0.531249	0.996921	original		0.02	FALSE	FALSE	FALSE	out-of-context	{}
Mathematics	math_double	18 is to 36 as 74 is to	148	x	0.53	0	0	{'x': 0.53, 'what': 0.18, '': 0.11, 'y': 0.09, 'X': 0.04}	8050	9.0804e-09	0.53125	0.919782	original		0.02	FALSE	FALSE	FALSE	out-of-context	{}
Mathematics	math_double	86 is to 172 as 16 is to	32	x	0.53	0	0	{'x': 0.53, '': 0.16, 'what': 0.14, 'y': 0.09, 'X': 0.03}	1482	1.88127e-07	0.527344	0.985232	original		0.02	FALSE	FALSE	FALSE	out-of-context	{}
Mathematics	math_double	85 is to 170 as 16 is to	32	x	0.53	0	0	{'x': 0.53, '': 0.2, 'what': 0.11, 'y': 0.08, 'X': 0.04}	3993	3.14321e-08	0.527344	0.96021	original		0.02	FALSE	FALSE	FALSE	out-of-context	{}
Mathematics	math_double	84 is to 168 as 16 is to	32	x	0.53	0	0	{'x': 0.53, '': 0.18, 'what': 0.12, 'y': 0.06, 'X': 0.05}	2186	9.91859e-08	0.527344	0.978217	original		0.02	FALSE	FALSE	FALSE	out-of-context	{}
Mathematics	math_double	64 is to 128 as 72 is to	144	x	0.53	0	0	{'x': 0.53, 'y': 0.16, 'what': 0.14, '\\(': 0.04, '': 0.04}	3916	4.77303e-08	0.527344	0.960977	original		0.02	FALSE	FALSE	FALSE	out-of-context	{}
Mathematics	math_double	58 is to 116 as 28 is to	56	x	0.53	0	0	{'x': 0.53, 'what': 0.22, 'y': 0.1, '': 0.08, 'X': 0.03}	1913	6.10016e-08	0.53125	0.980937	original		0.02	FALSE	FALSE	FALSE	out-of-context	{}
Mathematics	math_division2	94 is to 47 as 76 is to	38	x	0.53	0	0	{'x': 0.53, 'y': 0.19, 'what': 0.12, '': 0.06, 'X': 0.03}	5461	1.31549e-08	0.527344	0.945582	original		0.02	FALSE	FALSE	FALSE	out-of-context	{}
Mathematics	math_double	26 is to 52 as 30 is to	60	x	0.52	0	0	{'x': 0.52, 'y': 0.17, 'what': 0.13, 'X': 0.05, '': 0.04}	1367	1.6205e-07	0.523437	0.986378	original		0.02	FALSE	FALSE	FALSE	out-of-context	{}
Mathematics	math_double	26 is to 52 as 74 is to	148	x	0.52	0	0	{'x': 0.52, 'what': 0.17, 'y': 0.11, 'X': 0.06, '': 0.06}	6919	1.76951e-08	0.515625	0.931053	original		0.02	FALSE	FALSE	FALSE	out-of-context	{}
Mathematics	math_double	18 is to 36 as 85 is to	170	x	0.52	0	0	{'x': 0.52, 'what': 0.16, 'y': 0.12, '': 0.1, 'X': 0.04}	3535	3.49246e-08	0.515625	0.964774	original		0.02	FALSE	FALSE	FALSE	out-of-context	{}
Mathematics	math_double	22 is to 44 as 85 is to	170	x	0.52	0	0	{'x': 0.52, 'what': 0.12, 'y': 0.12, '': 0.1, 'X': 0.05}	3863	4.42378e-08	0.523437	0.961506	original		0.02	FALSE	FALSE	FALSE	out-of-context	{}
Mathematics	math_double	88 is to 176 as 28 is to	56	x	0.52	0	0	{'x': 0.52, 'what': 0.22, '': 0.11, 'y': 0.09, 'X': 0.02}	1186	1.68569e-07	0.519531	0.988182	original		0.02	FALSE	FALSE	FALSE	out-of-context	{}
Mathematics	math_double	78 is to 156 as 28 is to	56	x	0.52	0	0	{'x': 0.52, 'what': 0.19, '': 0.11, 'y': 0.1, 'X': 0.03}	1774	7.63685e-08	0.519531	0.982322	original		0.02	FALSE	FALSE	FALSE	out-of-context	{}
Mathematics	math_double	78 is to 156 as 85 is to	170	x	0.52	0	0	{'x': 0.52, 'what': 0.18, 'y': 0.14, '': 0.09, 'X': 0.02}	1426	8.84756e-08	0.523437	0.98579	original		0.02	FALSE	FALSE	FALSE	out-of-context	{}
Mathematics	math_double	84 is to 168 as 28 is to	56	x	0.52	0	0	{'x': 0.52, 'what': 0.17, '': 0.12, 'y': 0.09, 'X': 0.05}	1607	9.26666e-08	0.523437	0.983986	original		0.02	FALSE	FALSE	FALSE	out-of-context	{}
Mathematics	math_double	64 is to 128 as 16 is to	32	x	0.52	0	0	{'x': 0.52, 'what': 0.12, '': 0.11, 'y': 0.08, 'X': 0.05}	2630	9.54606e-08	0.523437	0.973792	original		0.02	FALSE	FALSE	FALSE	out-of-context	{}
Mathematics	math_double	56 is to 112 as 74 is to	148	x	0.52	0	0	{'x': 0.52, 'what': 0.19, 'y': 0.11, '': 0.1, '\\(': 0.02}	6058	1.10012e-08	0.519531	0.939632	original		0.02	FALSE	FALSE	FALSE	out-of-context	{}
Mathematics	math_double	74 is to 148 as 28 is to	56	x	0.52	0	0	{'x': 0.52, 'what': 0.21, 'y': 0.11, '': 0.07, 'X': 0.03}	1844	5.42495e-08	0.519531	0.981625	original		0.02	FALSE	FALSE	FALSE	out-of-context	{}
Mathematics	math_double	76 is to 152 as 30 is to	60	x	0.52	0	0	{'x': 0.52, 'what': 0.2, 'y': 0.12, '': 0.08, 'X': 0.03}	1617	8.9407e-08	0.519531	0.983887	original		0.02	FALSE	FALSE	FALSE	out-of-context	{}
Mathematics	math_division2	46 is to 23 as 76 is to	38	x	0.52	0	0	{'x': 0.52, 'y': 0.19, 'what': 0.12, '': 0.06, 'X': 0.03}	4536	1.46101e-08	0.523437	0.954799	original		0.02	FALSE	FALSE	FALSE	out-of-context	{}
Mathematics	math_division2	2 is to 1 as 76 is to	38	x	0.52	0	0	{'x': 0.52, '': 0.22, 'X': 0.07, 'y': 0.05, 'what': 0.05}	5201	9.40636e-08	0.523437	0.948172	original		0.02	FALSE	FALSE	FALSE	out-of-context	{}
Mathematics	math_squares	4 is to 16 as 26 is to	676	x	0.52	0	0	{'x': 0.52, 'y': 0.15, 'what': 0.15, '': 0.06, 'X': 0.06}	27154	1.31695e-09	0.515625	0.729412	original		0.02	FALSE	FALSE	FALSE	out-of-context	{}
Mathematics	math_squares	16 is to 256 as 12 is to	144	x	0.52	0	0	{'x': 0.52, 'what': 0.22, 'y': 0.09, '': 0.06, 'X': 0.04}	4453	2.38651e-08	0.523437	0.955626	original		0.02	FALSE	FALSE	FALSE	out-of-context	{}
Mathematics	math_division5	5 is to 1 as 65 is to	13	x	0.52	0	0	{'x': 0.52, '': 0.19, 'X': 0.06, 'y': 0.06, 'what': 0.05}	3537	1.64844e-07	0.523437	0.964754	original		0.02	FALSE	FALSE	FALSE	out-of-context	{}
Mathematics	math_division2	74 is to 37 as 76 is to	38	x	0.52	0	0	{'x': 0.52, 'y': 0.23, 'what': 0.09, 'X': 0.04, '': 0.04}	6590	1.25146e-08	0.523437	0.934331	original		0.02	FALSE	FALSE	FALSE	out-of-context	{}
Mathematics	math_division2	64 is to 32 as 94 is to	47	x	0.52	0	0	{'x': 0.52, 'what': 0.13, 'y': 0.1, '': 0.08, 'X': 0.06}	2326	1.10362e-07	0.523437	0.976822	original		0.02	FALSE	FALSE	FALSE	out-of-context	{}
Mathematics	math_division2	84 is to 42 as 76 is to	38	x	0.52	0	0	{'x': 0.52, 'y': 0.21, 'what': 0.13, '': 0.05, '\\(': 0.03}	7644	9.37143e-09	0.515625	0.923828	original		0.02	FALSE	FALSE	FALSE	out-of-context	{}
Mathematics	math_double	25 is to 50 as 85 is to	170	x	0.51	0	0	{'x': 0.51, 'what': 0.14, 'y': 0.13, '': 0.11, 'X': 0.05}	1663	5.68107e-08	0.511719	0.983428	original		0.02	FALSE	FALSE	FALSE	out-of-context	{}
Mathematics	math_double	18 is to 36 as 15 is to	30	x	0.51	0	0	{'x': 0.51, 'what': 0.24, 'y': 0.1, '': 0.09, 'X': 0.03}	1573	5.9139e-08	0.507812	0.984325	original		0.02	FALSE	FALSE	FALSE	out-of-context	{}
Mathematics	math_double	86 is to 172 as 74 is to	148	x	0.51	0	0	{'x': 0.51, 'what': 0.18, 'y': 0.12, '': 0.11, '\\(': 0.02}	7631	1.53668e-08	0.511719	0.923958	original		0.02	FALSE	FALSE	FALSE	out-of-context	{}
Mathematics	math_double	96 is to 192 as 28 is to	56	x	0.51	0	0	{'x': 0.51, 'what': 0.18, '': 0.12, 'y': 0.1, 'X': 0.03}	1680	8.84756e-08	0.507812	0.983259	original		0.02	FALSE	FALSE	FALSE	out-of-context	{}
Mathematics	math_double	94 is to 188 as 20 is to	40	x	0.51	0	0	{'x': 0.51, 'what': 0.2, '': 0.11, 'y': 0.09, 'X': 0.04}	1183	1.85333e-07	0.507812	0.988211	original		0.02	FALSE	FALSE	FALSE	out-of-context	{}
Mathematics	math_double	74 is to 148 as 50 is to	100	x	0.51	0	0	{'x': 0.51, 'what': 0.2, 'y': 0.11, '': 0.09, 'X': 0.03}	556	3.65078e-07	0.511718	0.99446	original		0.02	FALSE	FALSE	FALSE	out-of-context	{}
Mathematics	math_double	74 is to 148 as 30 is to	60	x	0.51	0	0	{'x': 0.51, 'what': 0.2, 'y': 0.12, '': 0.08, 'X': 0.04}	1872	6.28643e-08	0.507812	0.981346	original		0.02	FALSE	FALSE	FALSE	out-of-context	{}
Mathematics	math_double	76 is to 152 as 16 is to	32	x	0.51	0	0	{'x': 0.51, 'what': 0.17, '': 0.14, 'y': 0.09, 'X': 0.04}	3133	5.26197e-08	0.511719	0.96878	original		0.02	FALSE	FALSE	FALSE	out-of-context	{}
Mathematics	math_squares	8 is to 64 as 26 is to	676	x	0.51	0	0	{'x': 0.51, 'what': 0.17, 'y': 0.16, 'X': 0.05, '': 0.04}	29466	9.38599e-10	0.507812	0.706374	original		0.02	FALSE	FALSE	FALSE	out-of-context	{}
Mathematics	math_division2	98 is to 49 as 80 is to	40	x	0.51	0	0	{'x': 0.51, 'y': 0.18, 'what': 0.13, '': 0.05, '\\(': 0.04}	2110	1.04308e-07	0.511719	0.978974	original		0.02	FALSE	FALSE	FALSE	out-of-context	{}
Mathematics	math_double	5 is to 10 as 16 is to	32	x	0.51	0	0	{'x': 0.51, 'y': 0.18, 'what': 0.12, '': 0.07, 'X': 0.05}	3511	2.87546e-08	0.507812	0.965013	original		0.02	FALSE	FALSE	FALSE	out-of-context	{}
Mathematics	math_division2	74 is to 37 as 70 is to	35	x	0.51	0	0	{'x': 0.51, 'y': 0.21, 'what': 0.1, '\\(': 0.05, '': 0.04}	4331	2.78233e-08	0.511719	0.956842	original		0.02	FALSE	FALSE	FALSE	out-of-context	{}
Mathematics	math_division2	66 is to 33 as 40 is to	20	x	0.51	0	0	{'x': 0.51, 'what': 0.16, 'y': 0.16, '': 0.06, 'X': 0.03}	2466	6.79865e-08	0.507812	0.975426	original		0.02	FALSE	FALSE	FALSE	out-of-context	{}
Mathematics	math_division2	62 is to 31 as 96 is to	48	x	0.51	0	0	{'x': 0.51, 'y': 0.26, 'what': 0.1, '': 0.04, 'Y': 0.02}	1745	5.65778e-08	0.511719	0.982611	original		0.02	FALSE	FALSE	FALSE	out-of-context	{}
Mathematics	math_division2	84 is to 42 as 62 is to	31	x	0.51	0	0	{'x': 0.51, 'y': 0.21, 'what': 0.13, '': 0.06, '\\(': 0.03}	7299	9.31323e-09	0.507812	0.927266	original		0.02	FALSE	FALSE	FALSE	out-of-context	{}
Mathematics	math_division2	84 is to 42 as 34 is to	17	x	0.51	0	0	{'x': 0.51, 'y': 0.18, 'what': 0.15, '': 0.06, '\\(': 0.03}	2491	6.00703e-08	0.507812	0.975177	original		0.02	FALSE	FALSE	FALSE	out-of-context	{}
Mathematics	math_double	14 is to 28 as 20 is to	40	x	0.5	0	0	{'x': 0.5, 'what': 0.18, 'y': 0.16, 'X': 0.06, '': 0.04}	553	3.11062e-07	0.496093	0.994489	original		0.02	FALSE	FALSE	FALSE	out-of-context	{}
Mathematics	math_double	15 is to 30 as 85 is to	170	x	0.5	0	0	{'x': 0.5, 'what': 0.17, 'y': 0.16, '': 0.09, 'X': 0.04}	1994	3.51574e-08	0.503906	0.98013	original		0.02	FALSE	FALSE	FALSE	out-of-context	{}
Mathematics	math_double	8 is to 16 as 24 is to	48	x	0.5	0	0	{'x': 0.5, 'y': 0.2, 'what': 0.15, 'X': 0.05, '': 0.03}	2136	5.65778e-08	0.498047	0.978715	original		0.02	FALSE	FALSE	FALSE	out-of-context	{}
Mathematics	math_double	28 is to 56 as 85 is to	170	x	0.5	0	0	{'x': 0.5, 'what': 0.19, 'y': 0.15, '': 0.06, 'X': 0.04}	2339	5.42495e-08	0.5	0.976692	original		0.02	FALSE	FALSE	FALSE	out-of-context	{}
Mathematics	math_double	28 is to 56 as 20 is to	40	x	0.5	0	0	{'x': 0.5, 'what': 0.25, 'y': 0.12, '': 0.05, 'X': 0.04}	537	3.61353e-07	0.496093	0.994649	original		0.02	FALSE	FALSE	FALSE	out-of-context	{}
Mathematics	math_double	20 is to 40 as 16 is to	32	x	0.5	0	0	{'x': 0.5, '': 0.17, 'y': 0.15, 'what': 0.1, 'X': 0.03}	2785	2.78233e-08	0.5	0.972248	original		0.02	FALSE	FALSE	FALSE	out-of-context	{}
Mathematics	math_double	18 is to 36 as 26 is to	52	x	0.5	0	0	{'x': 0.5, 'y': 0.19, 'what': 0.18, '': 0.05, 'X': 0.03}	3021	2.20025e-08	0.5	0.969896	original		0.02	FALSE	FALSE	FALSE	out-of-context	{}
Mathematics	math_double	88 is to 176 as 16 is to	32	x	0.5	0	0	{'x': 0.5, '': 0.18, 'what': 0.16, 'y': 0.07, 'X': 0.03}	1793	1.35973e-07	0.503906	0.982133	original		0.02	FALSE	FALSE	FALSE	out-of-context	{}
Mathematics	math_double	82 is to 164 as 20 is to	40	x	0.5	0	0	{'x': 0.5, 'what': 0.22, '': 0.13, 'X': 0.05, 'y': 0.05}	854	3.22238e-07	0.503906	0.99149	original		0.02	FALSE	FALSE	FALSE	out-of-context	{}
Mathematics	math_double	74 is to 148 as 16 is to	32	x	0.5	0	0	{'x': 0.5, 'what': 0.18, '': 0.16, 'y': 0.08, 'X': 0.04}	3050	4.2608e-08	0.496094	0.969607	original		0.02	FALSE	FALSE	FALSE	out-of-context	{}
Mathematics	math_division2	56 is to 28 as 64 is to	32	x	0.5	0	0	{'x': 0.5, 'y': 0.21, 'what': 0.13, '': 0.06, '\\(': 0.02}	2955	3.81842e-08	0.503906	0.970554	original		0.02	FALSE	FALSE	FALSE	out-of-context	{}
Mathematics	math_squares	28 is to 784 as 26 is to	676	x	0.5	0	0	{'x': 0.5, 'what': 0.17, 'y': 0.12, '': 0.07, 'X': 0.05}	5945	2.98023e-08	0.496094	0.940759	original		0.02	FALSE	FALSE	FALSE	out-of-context	{}
Mathematics	math_squares	22 is to 484 as 25 is to	625	x	0.5	0	0	{'x': 0.5, 'what': 0.2, 'y': 0.1, '': 0.08, 'X': 0.05}	3964	5.23869e-08	0.503906	0.960499	original		0.02	FALSE	FALSE	FALSE	out-of-context	{}
Mathematics	math_division2	2 is to 1 as 46 is to	23	x	0.5	0	0	{'x': 0.5, '': 0.23, 'X': 0.08, 'y': 0.06, 'what': 0.04}	2169	2.68221e-07	0.5	0.978386	original		0.02	FALSE	FALSE	FALSE	out-of-context	{}
Mathematics	math_division2	60 is to 30 as 58 is to	29	x	0.5	0	0	{'x': 0.5, 'y': 0.19, 'what': 0.14, '': 0.09, 'X': 0.03}	2729	2.92202e-08	0.5	0.972806	original		0.02	FALSE	FALSE	FALSE	out-of-context	{}
Mathematics	math_division2	60 is to 30 as 38 is to	19	x	0.5	0	0	{'x': 0.5, 'y': 0.19, 'what': 0.13, '': 0.1, 'X': 0.03}	5044	1.0943e-08	0.503906	0.949737	original		0.02	FALSE	FALSE	FALSE	out-of-context	{}
Mathematics	math_division2	64 is to 32 as 80 is to	40	x	0.5	0	0	{'x': 0.5, 'what': 0.16, 'y': 0.14, 'X': 0.06, '': 0.04}	1409	2.17929e-07	0.503906	0.985959	original		0.02	FALSE	FALSE	FALSE	out-of-context	{}
Mathematics	math_division2	64 is to 32 as 76 is to	38	x	0.5	0	0	{'x': 0.5, 'what': 0.16, 'y': 0.1, '': 0.08, 'X': 0.06}	3256	6.70552e-08	0.503906	0.967554	original		0.02	FALSE	FALSE	FALSE	out-of-context	{}
Mathematics	math_division2	78 is to 39 as 34 is to	17	x	0.5	0	0	{'x': 0.5, 'what': 0.17, 'y': 0.13, '': 0.12, 'X': 0.03}	1976	8.61473e-08	0.498047	0.980309	original		0.02	FALSE	FALSE	FALSE	out-of-context	{}
Mathematics	math_division2	78 is to 39 as 46 is to	23	x	0.5	0	0	{'x': 0.5, 'y': 0.14, '': 0.13, 'what': 0.13, 'X': 0.03}	2307	5.84405e-08	0.503906	0.977011	original		0.02	FALSE	FALSE	FALSE	out-of-context	{}
Mathematics	math_double	48 is to 96 as 74 is to	148	x	0.49	0	0	{'x': 0.49, 'what': 0.23, '': 0.1, 'y': 0.09, 'X': 0.03}	8747	7.68341e-09	0.486328	0.912837	original		0.02	FALSE	FALSE	FALSE	out-of-context	{}
Mathematics	math_double	14 is to 28 as 30 is to	60	x	0.49	0	0	{'x': 0.49, 'y': 0.21, 'what': 0.12, 'X': 0.06, '': 0.04}	1788	6.98492e-08	0.486328	0.982183	original		0.02	FALSE	FALSE	FALSE	out-of-context	{}
Mathematics	math_double	88 is to 176 as 30 is to	60	x	0.49	0	0	{'x': 0.49, 'what': 0.22, '': 0.12, 'y': 0.11, 'X': 0.03}	950	2.30037e-07	0.486328	0.990533	original		0.02	FALSE	FALSE	FALSE	out-of-context	{}
Mathematics	math_double	78 is to 156 as 16 is to	32	x	0.49	0	0	{'x': 0.49, '': 0.19, 'what': 0.16, 'y': 0.08, 'X': 0.04}	3219	4.28408e-08	0.490234	0.967923	original		0.02	FALSE	FALSE	FALSE	out-of-context	{}
Mathematics	math_double	96 is to 192 as 74 is to	148	x	0.49	0	0	{'x': 0.49, 'what': 0.21, '': 0.12, 'y': 0.08, '\\(': 0.03}	5901	1.32131e-08	0.486328	0.941197	original		0.02	FALSE	FALSE	FALSE	out-of-context	{}
Mathematics	math_double	64 is to 128 as 74 is to	148	x	0.49	0	0	{'x': 0.49, 'what': 0.15, '': 0.1, 'y': 0.1, 'X': 0.04}	6846	2.38651e-08	0.486328	0.93178	original		0.02	FALSE	FALSE	FALSE	out-of-context	{}
Mathematics	math_double	58 is to 116 as 16 is to	32	x	0.49	0	0	{'x': 0.49, '': 0.18, 'what': 0.17, 'y': 0.08, 'X': 0.03}	2556	6.70552e-08	0.488281	0.97453	original		0.02	FALSE	FALSE	FALSE	out-of-context	{}
Mathematics	math_division2	38 is to 19 as 28 is to	14	x	0.49	0	0	{'x': 0.49, 'y': 0.21, 'what': 0.11, '': 0.06, 'X': 0.04}	973	2.98023e-07	0.490234	0.990304	original		0.02	FALSE	FALSE	FALSE	out-of-context	{}
Mathematics	math_division2	54 is to 27 as 64 is to	32	x	0.49	0	0	{'x': 0.49, 'y': 0.24, 'what': 0.1, '': 0.06, '\\(': 0.03}	3498	3.72529e-08	0.488281	0.965143	original		0.02	FALSE	FALSE	FALSE	out-of-context	{}
Mathematics	math_division2	54 is to 27 as 50 is to	25	x	0.49	0	0	{'x': 0.49, 'y': 0.18, 'what': 0.11, '': 0.08, '\\(': 0.04}	1722	1.28523e-07	0.492187	0.98284	original		0.02	FALSE	FALSE	FALSE	out-of-context	{}
Mathematics	math_division2	46 is to 23 as 62 is to	31	x	0.49	0	0	{'x': 0.49, 'y': 0.23, 'what': 0.09, '': 0.07, 'X': 0.03}	4457	1.74623e-08	0.492187	0.955586	original		0.02	FALSE	FALSE	FALSE	out-of-context	{}
Mathematics	math_squares	25 is to 625 as 26 is to	676	x	0.49	0	0	{'x': 0.49, 'what': 0.25, '': 0.08, 'y': 0.07, 'X': 0.04}	7048	1.21072e-08	0.488281	0.929767	original		0.02	FALSE	FALSE	FALSE	out-of-context	{}
Mathematics	math_division2	60 is to 30 as 62 is to	31	x	0.49	0	0	{'x': 0.49, 'y': 0.25, 'what': 0.1, '': 0.06, 'X': 0.04}	3620	2.06055e-08	0.486328	0.963927	original		0.02	FALSE	FALSE	FALSE	out-of-context	{}
Mathematics	math_division2	60 is to 30 as 28 is to	14	x	0.49	0	0	{'x': 0.49, 'y': 0.18, 'what': 0.14, '': 0.11, 'X': 0.03}	1224	1.00117e-07	0.486328	0.987803	original		0.02	FALSE	FALSE	FALSE	out-of-context	{}
Mathematics	math_division2	62 is to 31 as 80 is to	40	x	0.49	0	0	{'x': 0.49, 'y': 0.26, 'what': 0.12, '': 0.03, '\\(': 0.03}	1727	6.33299e-08	0.494141	0.982791	original		0.02	FALSE	FALSE	FALSE	out-of-context	{}
Mathematics	math_division2	78 is to 39 as 64 is to	32	x	0.49	0	0	{'x': 0.49, 'y': 0.19, 'what': 0.14, '': 0.08, 'X': 0.03}	4091	2.95695e-08	0.490234	0.959233	original		0.02	FALSE	FALSE	FALSE	out-of-context	{}
Mathematics	math_division2	82 is to 41 as 34 is to	17	x	0.49	0	0	{'x': 0.49, 'y': 0.17, 'what': 0.16, '': 0.09, '\\(': 0.03}	1621	1.01514e-07	0.490234	0.983847	original		0.02	FALSE	FALSE	FALSE	out-of-context	{}
Mathematics	math_division2	82 is to 41 as 80 is to	40	x	0.49	0	0	{'x': 0.49, 'y': 0.21, 'what': 0.13, '\\(': 0.05, '': 0.04}	2191	9.45292e-08	0.490234	0.978167	original		0.02	FALSE	FALSE	FALSE	out-of-context	{}
Mathematics	math_double	42 is to 84 as 16 is to	32	x	0.48	0	0	{'x': 0.48, 'what': 0.17, '': 0.13, 'y': 0.09, 'X': 0.04}	2091	1.06636e-07	0.476562	0.979163	original		0.02	FALSE	FALSE	FALSE	out-of-context	{}
Mathematics	math_double	48 is to 96 as 28 is to	56	x	0.48	0	0	{'x': 0.48, 'what': 0.22, '': 0.11, 'y': 0.09, 'X': 0.04}	1579	1.01514e-07	0.476562	0.984265	original		0.02	FALSE	FALSE	FALSE	out-of-context	{}
Mathematics	math_double	48 is to 96 as 16 is to	32	x	0.48	0	0	{'x': 0.48, 'what': 0.19, '': 0.14, 'y': 0.07, 'X': 0.04}	2047	9.82545e-08	0.482422	0.979602	original		0.02	FALSE	FALSE	FALSE	out-of-context	{}
Mathematics	math_double	28 is to 56 as 74 is to	148	x	0.48	0	0	{'x': 0.48, 'what': 0.25, 'y': 0.12, '': 0.05, 'X': 0.04}	6420	1.27475e-08	0.480469	0.936025	original		0.02	FALSE	FALSE	FALSE	out-of-context	{}
Mathematics	math_double	54 is to 108 as 85 is to	170	x	0.48	0	0	{'x': 0.48, 'what': 0.2, 'y': 0.13, '': 0.11, '\\(': 0.02}	2101	5.54137e-08	0.476562	0.979064	original		0.02	FALSE	FALSE	FALSE	out-of-context	{}
Mathematics	math_double	68 is to 136 as 16 is to	32	x	0.48	0	0	{'x': 0.48, '': 0.24, 'what': 0.13, 'y': 0.05, 'X': 0.04}	1841	1.13621e-07	0.476562	0.981655	original		0.02	FALSE	FALSE	FALSE	out-of-context	{}
Mathematics	math_double	68 is to 136 as 28 is to	56	x	0.48	0	0	{'x': 0.48, 'what': 0.22, '': 0.13, 'y': 0.08, 'X': 0.04}	1218	1.67638e-07	0.478515	0.987863	original		0.02	FALSE	FALSE	FALSE	out-of-context	{}
Mathematics	math_division2	38 is to 19 as 46 is to	23	x	0.48	0	0	{'x': 0.48, 'y': 0.22, 'what': 0.1, '': 0.06, 'X': 0.05}	1437	1.15018e-07	0.480469	0.98568	original		0.02	FALSE	FALSE	FALSE	out-of-context	{}
Mathematics	math_division2	38 is to 19 as 62 is to	31	x	0.48	0	0	{'x': 0.48, 'y': 0.2, 'what': 0.12, '': 0.07, 'X': 0.05}	4793	2.23517e-08	0.484375	0.952238	original		0.02	FALSE	FALSE	FALSE	out-of-context	{}
Mathematics	math_division2	52 is to 26 as 46 is to	23	x	0.48	0	0	{'x': 0.48, 'y': 0.17, 'what': 0.16, '': 0.08, 'X': 0.04}	1801	1.01514e-07	0.482422	0.982053	original		0.02	FALSE	FALSE	FALSE	out-of-context	{}
Mathematics	math_division2	56 is to 28 as 46 is to	23	x	0.48	0	0	{'x': 0.48, 'what': 0.16, 'y': 0.15, '': 0.13, 'X': 0.02}	2085	5.68107e-08	0.478516	0.979223	original		0.02	FALSE	FALSE	FALSE	out-of-context	{}
Mathematics	math_division2	46 is to 23 as 28 is to	14	x	0.48	0	0	{'x': 0.48, 'y': 0.22, 'what': 0.1, '': 0.06, '\\(': 0.04}	957	2.03028e-07	0.484375	0.990464	original		0.02	FALSE	FALSE	FALSE	out-of-context	{}
Mathematics	math_squares	4 is to 16 as 5 is to	25	x	0.48	0	0	{'x': 0.48, '': 0.17, 'what': 0.15, 'y': 0.1, 'X': 0.04}	653	5.43892e-07	0.484374	0.993493	original		0.02	FALSE	FALSE	FALSE	out-of-context	{}
Mathematics	math_division2	94 is to 47 as 34 is to	17	x	0.48	0	0	{'x': 0.48, 'y': 0.17, 'what': 0.14, '': 0.1, 'X': 0.03}	1868	1.04774e-07	0.476562	0.981386	original		0.02	FALSE	FALSE	FALSE	out-of-context	{}
Mathematics	math_division2	64 is to 32 as 26 is to	13	x	0.48	0	0	{'x': 0.48, 'what': 0.15, 'y': 0.11, '': 0.11, 'X': 0.05}	2000	2.32831e-07	0.476562	0.98007	original		0.02	FALSE	FALSE	FALSE	out-of-context	{}
Mathematics	math_division2	84 is to 42 as 94 is to	47	x	0.48	0	0	{'x': 0.48, 'y': 0.23, 'what': 0.12, '': 0.06, '\\(': 0.03}	1976	7.63685e-08	0.480469	0.980309	original		0.02	FALSE	FALSE	FALSE	out-of-context	{}
Mathematics	math_division2	76 is to 38 as 46 is to	23	x	0.48	0	0	{'x': 0.48, 'y': 0.21, 'what': 0.14, '': 0.1, 'X': 0.02}	1972	5.58794e-08	0.476562	0.980349	original		0.02	FALSE	FALSE	FALSE	out-of-context	{}
Mathematics	math_double	48 is to 96 as 24 is to	48	x	0.47	0	0	{'x': 0.47, 'what': 0.26, '': 0.09, 'y': 0.06, 'X': 0.04}	884	2.47732e-07	0.474609	0.991191	original		0.02	FALSE	FALSE	FALSE	out-of-context	{}
Mathematics	math_double	48 is to 96 as 56 is to	112	x	0.47	0	0	{'x': 0.47, 'what': 0.22, 'y': 0.13, '': 0.07, 'X': 0.03}	9514	6.75209e-09	0.472656	0.905194	original		0.02	FALSE	FALSE	FALSE	out-of-context	{}
Mathematics	math_double	45 is to 90 as 16 is to	32	x	0.47	0	0	{'x': 0.47, '': 0.21, 'what': 0.12, 'y': 0.1, '\\(': 0.03}	2129	5.96046e-08	0.474609	0.978785	original		0.02	FALSE	FALSE	FALSE	out-of-context	{}
Mathematics	math_double	8 is to 16 as 85 is to	170	x	0.47	0	0	{'x': 0.47, 'what': 0.16, '': 0.12, 'y': 0.11, 'X': 0.06}	4938	3.44589e-08	0.474609	0.950793	original		0.02	FALSE	FALSE	FALSE	out-of-context	{}
Mathematics	math_double	25 is to 50 as 16 is to	32	x	0.47	0	0	{'x': 0.47, '': 0.18, 'what': 0.15, 'y': 0.08, 'X': 0.05}	1480	6.70552e-08	0.474609	0.985252	original		0.02	FALSE	FALSE	FALSE	out-of-context	{}
Mathematics	math_double	28 is to 56 as 16 is to	32	x	0.47	0	0	{'x': 0.47, 'what': 0.25, 'y': 0.1, '': 0.08, 'X': 0.05}	1251	1.23866e-07	0.466797	0.987534	original		0.02	FALSE	FALSE	FALSE	out-of-context	{}
Mathematics	math_double	22 is to 44 as 20 is to	40	x	0.47	0	0	{'x': 0.47, 'what': 0.17, 'y': 0.13, '': 0.08, 'X': 0.05}	1013	3.55765e-07	0.470703	0.989906	original		0.02	FALSE	FALSE	FALSE	out-of-context	{}
Mathematics	math_double	92 is to 184 as 20 is to	40	x	0.47	0	0	{'x': 0.47, 'what': 0.28, '': 0.1, 'y': 0.08, 'X': 0.03}	1065	1.79745e-07	0.46875	0.989387	original		0.02	FALSE	FALSE	FALSE	out-of-context	{}
Mathematics	math_double	92 is to 184 as 16 is to	32	x	0.47	0	0	{'x': 0.47, 'what': 0.22, '': 0.15, 'y': 0.07, 'X': 0.03}	2343	7.54371e-08	0.474609	0.976652	original		0.02	FALSE	FALSE	FALSE	out-of-context	{}
Mathematics	math_double	94 is to 188 as 30 is to	60	x	0.47	0	0	{'x': 0.47, 'what': 0.2, 'y': 0.13, '': 0.1, 'X': 0.03}	1681	9.82545e-08	0.470703	0.983249	original		0.02	FALSE	FALSE	FALSE	out-of-context	{}
Mathematics	math_double	94 is to 188 as 16 is to	32	x	0.47	0	0	{'x': 0.47, '': 0.18, 'what': 0.16, 'y': 0.09, 'X': 0.03}	2806	6.93835e-08	0.474609	0.972038	original		0.02	FALSE	FALSE	FALSE	out-of-context	{}
Mathematics	math_double	62 is to 124 as 28 is to	56	x	0.47	0	0	{'x': 0.47, 'what': 0.22, 'y': 0.14, '': 0.08, 'X': 0.03}	1489	1.11759e-07	0.472656	0.985162	original		0.02	FALSE	FALSE	FALSE	out-of-context	{}
Mathematics	math_double	62 is to 124 as 85 is to	170	x	0.47	0	0	{'x': 0.47, 'what': 0.19, 'y': 0.18, '': 0.08, '\\(': 0.02}	1645	7.35745e-08	0.472656	0.983608	original		0.02	FALSE	FALSE	FALSE	out-of-context	{}
Mathematics	math_double	58 is to 116 as 85 is to	170	x	0.47	0	0	{'x': 0.47, 'what': 0.21, 'y': 0.16, '': 0.11, '\\(': 0.01}	1748	7.31088e-08	0.46875	0.982581	original		0.02	FALSE	FALSE	FALSE	out-of-context	{}
Mathematics	math_division2	42 is to 21 as 62 is to	31	x	0.47	0	0	{'x': 0.47, 'y': 0.2, 'what': 0.12, '': 0.1, '\\(': 0.04}	5973	1.36206e-08	0.472656	0.94048	original		0.02	FALSE	FALSE	FALSE	out-of-context	{}
Mathematics	math_division2	96 is to 48 as 46 is to	23	x	0.47	0	0	{'x': 0.47, '': 0.18, 'y': 0.12, 'what': 0.12, 'X': 0.03}	4097	4.19095e-08	0.46875	0.959174	original		0.02	FALSE	FALSE	FALSE	out-of-context	{}
Mathematics	math_division2	60 is to 30 as 32 is to	16	x	0.47	0	0	{'x': 0.47, 'y': 0.21, 'what': 0.14, '': 0.09, 'X': 0.03}	583	3.20375e-07	0.472656	0.99419	original		0.02	FALSE	FALSE	FALSE	out-of-context	{}
Mathematics	math_division2	76 is to 38 as 34 is to	17	x	0.47	0	0	{'x': 0.47, 'y': 0.19, 'what': 0.17, '': 0.09, '\\(': 0.02}	1730	7.45058e-08	0.474609	0.982761	original		0.02	FALSE	FALSE	FALSE	out-of-context	{}
Mathematics	math_division2	82 is to 41 as 46 is to	23	x	0.47	0	0	{'x': 0.47, 'y': 0.19, 'what': 0.12, '': 0.12, '\\(': 0.03}	1856	7.63685e-08	0.472656	0.981505	original		0.02	FALSE	FALSE	FALSE	out-of-context	{}
Mathematics	math_double	46 is to 92 as 20 is to	40	x	0.46	0	0	{'x': 0.46, 'what': 0.28, 'y': 0.11, '': 0.07, '\\(': 0.03}	1076	1.41561e-07	0.458984	0.989278	original		0.02	FALSE	FALSE	FALSE	out-of-context	{}
Mathematics	math_double	15 is to 30 as 20 is to	40	x	0.46	0	0	{'x': 0.46, 'y': 0.2, 'what': 0.16, '': 0.1, 'X': 0.04}	227	1.05798e-06	0.46289	0.997738	original		0.02	FALSE	FALSE	FALSE	out-of-context	{}
Mathematics	math_double	15 is to 30 as 26 is to	52	x	0.46	0	0	{'x': 0.46, 'y': 0.22, 'what': 0.15, '': 0.08, 'X': 0.04}	3197	1.46101e-08	0.460937	0.968142	original		0.02	FALSE	FALSE	FALSE	out-of-context	{}
Mathematics	math_double	10 is to 20 as 85 is to	170	x	0.46	0	0	{'x': 0.46, 'what': 0.18, '': 0.12, 'y': 0.12, 'X': 0.05}	2547	3.72529e-08	0.462891	0.974619	original		0.02	FALSE	FALSE	FALSE	out-of-context	{}
Mathematics	math_double	18 is to 36 as 24 is to	48	x	0.46	0	0	{'x': 0.46, 'what': 0.22, 'y': 0.21, 'X': 0.03, '': 0.03}	1719	3.77186e-08	0.462891	0.98287	original		0.02	FALSE	FALSE	FALSE	out-of-context	{}
Mathematics	math_double	22 is to 44 as 16 is to	32	x	0.46	0	0	{'x': 0.46, 'what': 0.17, 'y': 0.12, '': 0.12, 'X': 0.05}	2326	8.6613e-08	0.460937	0.976822	original		0.02	FALSE	FALSE	FALSE	out-of-context	{}
Mathematics	math_double	22 is to 44 as 28 is to	56	x	0.46	0	0	{'x': 0.46, 'y': 0.18, 'what': 0.17, '': 0.05, 'X': 0.04}	2097	8.5216e-08	0.462891	0.979104	original		0.02	FALSE	FALSE	FALSE	out-of-context	{}
Mathematics	math_double	84 is to 168 as 74 is to	148	x	0.46	0	0	{'x': 0.46, 'what': 0.18, '': 0.17, 'y': 0.08, 'X': 0.04}	5774	1.93249e-08	0.462891	0.942463	original		0.02	FALSE	FALSE	FALSE	out-of-context	{}
Mathematics	math_double	88 is to 176 as 56 is to	112	x	0.46	0	0	{'x': 0.46, 'what': 0.24, 'y': 0.12, '': 0.11, 'X': 0.02}	5743	1.73459e-08	0.460937	0.942771	original		0.02	FALSE	FALSE	FALSE	out-of-context	{}
Mathematics	math_double	54 is to 108 as 74 is to	148	x	0.46	0	0	{'x': 0.46, 'what': 0.21, 'y': 0.13, '': 0.1, 'X': 0.03}	6308	1.15251e-08	0.462891	0.937141	original		0.02	FALSE	FALSE	FALSE	out-of-context	{}
Mathematics	math_double	55 is to 110 as 28 is to	56	x	0.46	0	0	{'x': 0.46, 'what': 0.2, 'y': 0.19, '': 0.07, '\\(': 0.02}	2146	4.49363e-08	0.464844	0.978615	original		0.02	FALSE	FALSE	FALSE	out-of-context	{}
Mathematics	math_double	55 is to 110 as 16 is to	32	x	0.46	0	0	{'x': 0.46, '': 0.18, 'what': 0.15, 'y': 0.12, 'X': 0.03}	2884	4.4005e-08	0.464844	0.971261	original		0.02	FALSE	FALSE	FALSE	out-of-context	{}
Mathematics	math_double	56 is to 112 as 46 is to	92	x	0.46	0	0	{'x': 0.46, 'what': 0.19, '': 0.16, 'y': 0.11, 'X': 0.02}	3557	2.98023e-08	0.457031	0.964555	original		0.02	FALSE	FALSE	FALSE	out-of-context	{}
Mathematics	math_double	74 is to 148 as 72 is to	144	x	0.46	0	0	{'x': 0.46, 'y': 0.21, 'what': 0.2, '': 0.04, '\\(': 0.03}	5478	1.55997e-08	0.455078	0.945412	original		0.02	FALSE	FALSE	FALSE	out-of-context	{}
Mathematics	math_division2	2 is to 1 as 62 is to	31	x	0.46	0	0	{'x': 0.46, '': 0.27, 'X': 0.06, 'y': 0.05, 'what': 0.05}	3447	1.71363e-07	0.464844	0.965651	original		0.02	FALSE	FALSE	FALSE	out-of-context	{}
Mathematics	math_squares	5 is to 25 as 25 is to	625		0.46	0	0	{'': 0.46, 'x': 0.24, 'X': 0.09, 'what': 0.06, 'y': 0.04}	8594	2.80561e-08	0.458984	0.914361	original		0.02	FALSE	FALSE	FALSE	out-of-context	{}
Mathematics	math_squares	14 is to 196 as 26 is to	676	x	0.46	0	0	{'x': 0.46, 'what': 0.23, 'y': 0.11, '': 0.1, 'X': 0.04}	18317	2.13913e-09	0.458984	0.817472	original		0.02	FALSE	FALSE	FALSE	out-of-context	{}
Mathematics	math_division2	66 is to 33 as 76 is to	38	x	0.46	0	0	{'x': 0.46, 'what': 0.18, 'y': 0.16, '': 0.09, 'X': 0.04}	5131	2.84053e-08	0.462891	0.94887	original		0.02	FALSE	FALSE	FALSE	out-of-context	{}
Mathematics	math_division2	62 is to 31 as 26 is to	13	x	0.46	0	0	{'x': 0.46, 'y': 0.21, 'what': 0.16, '': 0.08, '\\(': 0.02}	1274	1.35042e-07	0.458984	0.987305	original		0.02	FALSE	FALSE	FALSE	out-of-context	{}
Mathematics	math_division2	58 is to 29 as 96 is to	48	x	0.46	0	0	{'x': 0.46, 'y': 0.29, 'what': 0.13, '': 0.04, 'Y': 0.02}	1968	5.07571e-08	0.457031	0.980389	original		0.02	FALSE	FALSE	FALSE	out-of-context	{}
Mathematics	math_division2	64 is to 32 as 8 is to	4	x	0.46	0	0	{'x': 0.46, '': 0.2, 'what': 0.17, 'X': 0.04, 'y': 0.03}	516	1.95205e-06	0.462889	0.994858	original		0.02	FALSE	FALSE	FALSE	out-of-context	{}
Mathematics	math_division2	92 is to 46 as 34 is to	17	x	0.46	0	0	{'x': 0.46, 'what': 0.2, 'y': 0.14, '': 0.1, '\\(': 0.02}	1732	1.05705e-07	0.462891	0.982741	original		0.02	FALSE	FALSE	FALSE	out-of-context	{}
Mathematics	math_double	42 is to 84 as 28 is to	56	x	0.45	0	0	{'x': 0.45, 'what': 0.23, 'y': 0.13, '': 0.08, 'X': 0.03}	1475	9.59262e-08	0.451172	0.985302	original		0.02	FALSE	FALSE	FALSE	out-of-context	{}
Mathematics	math_double	38 is to 76 as 85 is to	170	x	0.45	0	0	{'x': 0.45, 'y': 0.23, 'what': 0.13, '': 0.07, 'X': 0.03}	2667	5.6345e-08	0.451172	0.973424	original		0.02	FALSE	FALSE	FALSE	out-of-context	{}
Mathematics	math_double	14 is to 28 as 15 is to	30	x	0.45	0	0	{'x': 0.45, 'what': 0.17, 'y': 0.15, '': 0.11, 'X': 0.05}	684	3.39001e-07	0.451172	0.993184	original		0.02	FALSE	FALSE	FALSE	out-of-context	{}
Mathematics	math_double	78 is to 156 as 74 is to	148	x	0.45	0	0	{'x': 0.45, 'what': 0.23, '': 0.13, 'y': 0.12, 'X': 0.02}	7236	9.77889e-09	0.449219	0.927894	original		0.02	FALSE	FALSE	FALSE	out-of-context	{}
Mathematics	math_double	98 is to 196 as 20 is to	40	x	0.45	0	0	{'x': 0.45, 'what': 0.22, '': 0.13, 'y': 0.07, 'X': 0.05}	881	3.44589e-07	0.447265	0.991221	original		0.02	FALSE	FALSE	FALSE	out-of-context	{}
Mathematics	math_double	96 is to 192 as 85 is to	170	x	0.45	0	0	{'x': 0.45, 'what': 0.22, '': 0.13, 'y': 0.09, '\\(': 0.03}	1711	1.13156e-07	0.449219	0.98295	original		0.02	FALSE	FALSE	FALSE	out-of-context	{}
Mathematics	math_double	94 is to 188 as 28 is to	56	x	0.45	0	0	{'x': 0.45, 'what': 0.24, 'y': 0.12, '': 0.11, 'X': 0.03}	1817	7.91624e-08	0.447266	0.981894	original		0.02	FALSE	FALSE	FALSE	out-of-context	{}
Mathematics	math_division2	54 is to 27 as 34 is to	17	x	0.45	0	0	{'x': 0.45, 'what': 0.17, 'y': 0.16, '': 0.12, 'X': 0.03}	1619	1.06171e-07	0.445312	0.983867	original		0.02	FALSE	FALSE	FALSE	out-of-context	{}
Mathematics	math_division2	54 is to 27 as 26 is to	13	x	0.45	0	0	{'x': 0.45, 'y': 0.17, 'what': 0.14, '': 0.12, 'X': 0.03}	1678	1.23866e-07	0.451172	0.983279	original		0.02	FALSE	FALSE	FALSE	out-of-context	{}
Mathematics	math_division2	42 is to 21 as 46 is to	23	x	0.45	0	0	{'x': 0.45, 'y': 0.21, 'what': 0.12, '': 0.09, '\\(': 0.04}	2184	6.70552e-08	0.449219	0.978237	original		0.02	FALSE	FALSE	FALSE	out-of-context	{}
Mathematics	math_division2	88 is to 44 as 46 is to	23	x	0.45	0	0	{'x': 0.45, '': 0.16, 'y': 0.15, 'what': 0.13, '\\(': 0.03}	2426	9.17353e-08	0.451172	0.975825	original		0.02	FALSE	FALSE	FALSE	out-of-context	{}
Mathematics	math_division2	76 is to 38 as 28 is to	14	x	0.45	0	0	{'x': 0.45, 'y': 0.25, 'what': 0.15, '': 0.06, '\\(': 0.03}	1041	1.51806e-07	0.453125	0.989627	original		0.02	FALSE	FALSE	FALSE	out-of-context	{}
Mathematics	math_double	42 is to 84 as 72 is to	144	x	0.44	0	0	{'x': 0.44, 'y': 0.18, 'what': 0.18, '': 0.07, '\\(': 0.05}	6385	1.55997e-08	0.4375	0.936374	original		0.02	FALSE	FALSE	FALSE	out-of-context	{}
Mathematics	math_double	14 is to 28 as 24 is to	48	x	0.44	0	0	{'x': 0.44, 'what': 0.2, 'y': 0.18, 'X': 0.06, '': 0.04}	1356	8.56817e-08	0.4375	0.986488	original		0.02	FALSE	FALSE	FALSE	out-of-context	{}
Mathematics	math_double	10 is to 20 as 74 is to	148	x	0.44	0	0	{'x': 0.44, 'what': 0.18, '': 0.18, 'y': 0.07, 'X': 0.06}	12127	4.27826e-09	0.443359	0.879155	original		0.02	FALSE	FALSE	FALSE	out-of-context	{}
Mathematics	math_double	82 is to 164 as 16 is to	32	x	0.44	0	0	{'x': 0.44, '': 0.2, 'what': 0.19, 'y': 0.05, 'X': 0.05}	2338	1.23866e-07	0.443359	0.976702	original		0.02	FALSE	FALSE	FALSE	out-of-context	{}
Mathematics	math_double	66 is to 132 as 28 is to	56	x	0.44	0	0	{'x': 0.44, 'what': 0.21, 'y': 0.14, '': 0.12, 'X': 0.03}	1965	7.45058e-08	0.443359	0.980419	original		0.02	FALSE	FALSE	FALSE	out-of-context	{}
Mathematics	math_division2	44 is to 22 as 26 is to	13	x	0.44	0	0	{'x': 0.44, 'what': 0.19, 'y': 0.18, '': 0.09, '\\(': 0.03}	1654	1.18744e-07	0.443359	0.983518	original		0.02	FALSE	FALSE	FALSE	out-of-context	{}
Mathematics	math_division2	98 is to 49 as 62 is to	31	x	0.44	0	0	{'x': 0.44, 'y': 0.17, 'what': 0.15, '': 0.11, 'X': 0.03}	5952	2.14204e-08	0.435547	0.940689	original		0.02	FALSE	FALSE	FALSE	out-of-context	{}
Mathematics	math_division2	64 is to 32 as 60 is to	30	x	0.44	0	0	{'x': 0.44, 'what': 0.2, 'y': 0.11, 'X': 0.06, '': 0.06}	3135	1.22003e-07	0.443359	0.96876	original		0.02	FALSE	FALSE	FALSE	out-of-context	{}
Mathematics	math_division2	66 is to 33 as 26 is to	13	x	0.44	0	0	{'x': 0.44, 'what': 0.18, 'y': 0.17, '': 0.1, 'X': 0.03}	1738	1.76951e-07	0.443359	0.982681	original		0.02	FALSE	FALSE	FALSE	out-of-context	{}
Mathematics	math_division2	84 is to 42 as 46 is to	23	x	0.44	0	0	{'x': 0.44, 'y': 0.23, 'what': 0.13, '': 0.09, '\\(': 0.03}	3030	4.6799e-08	0.439453	0.969806	original		0.02	FALSE	FALSE	FALSE	out-of-context	{}
Mathematics	math_division2	82 is to 41 as 62 is to	31	x	0.44	0	0	{'x': 0.44, 'y': 0.21, 'what': 0.14, '': 0.11, '\\(': 0.03}	4924	2.08383e-08	0.435547	0.950933	original		0.02	FALSE	FALSE	FALSE	out-of-context	{}
Mathematics	math_double	32 is to 64 as 24 is to	48	x	0.43	0	0	{'x': 0.43, 'what': 0.28, 'y': 0.1, 'X': 0.05, '': 0.05}	2907	6.65896e-08	0.431641	0.971032	original		0.02	FALSE	FALSE	FALSE	out-of-context	{}
Mathematics	math_double	44 is to 88 as 30 is to	60	x	0.43	0	0	{'x': 0.43, 'y': 0.18, 'what': 0.17, '': 0.1, 'X': 0.03}	1197	2.18861e-07	0.433594	0.988072	original		0.02	FALSE	FALSE	FALSE	out-of-context	{}
Mathematics	math_double	15 is to 30 as 28 is to	56	x	0.43	0	0	{'x': 0.43, 'y': 0.24, 'what': 0.17, '': 0.08, 'X': 0.03}	1792	3.63216e-08	0.425781	0.982143	original		0.02	FALSE	FALSE	FALSE	out-of-context	{}
Mathematics	math_double	10 is to 20 as 16 is to	32	x	0.43	0	0	{'x': 0.43, 'what': 0.19, 'y': 0.16, '': 0.1, 'X': 0.05}	1724	6.79865e-08	0.429687	0.98282	original		0.02	FALSE	FALSE	FALSE	out-of-context	{}
Mathematics	math_double	88 is to 176 as 74 is to	148	x	0.43	0	0	{'x': 0.43, 'what': 0.24, '': 0.14, 'y': 0.12, 'X': 0.02}	7016	1.64146e-08	0.433594	0.930086	original		0.02	FALSE	FALSE	FALSE	out-of-context	{}
Mathematics	math_double	82 is to 164 as 74 is to	148	x	0.43	0	0	{'x': 0.43, 'what': 0.27, '': 0.13, 'y': 0.08, 'X': 0.02}	7916	1.68802e-08	0.433594	0.921118	original		0.02	FALSE	FALSE	FALSE	out-of-context	{}
Mathematics	math_double	62 is to 124 as 74 is to	148	x	0.43	0	0	{'x': 0.43, 'what': 0.23, 'y': 0.17, '': 0.08, '\\(': 0.02}	7386	1.10012e-08	0.433594	0.926399	original		0.02	FALSE	FALSE	FALSE	out-of-context	{}
Mathematics	math_double	66 is to 132 as 74 is to	148	x	0.43	0	0	{'x': 0.43, 'what': 0.22, 'y': 0.16, '': 0.1, '\\(': 0.02}	8262	9.31323e-09	0.431641	0.91767	original		0.02	FALSE	FALSE	FALSE	out-of-context	{}
Mathematics	math_division2	44 is to 22 as 62 is to	31	x	0.43	0	0	{'x': 0.43, 'y': 0.19, 'what': 0.18, '': 0.1, '\\(': 0.03}	5148	2.17697e-08	0.425781	0.948701	original		0.02	FALSE	FALSE	FALSE	out-of-context	{}
Mathematics	math_squares	14 is to 196 as 25 is to	625	x	0.43	0	0	{'x': 0.43, 'what': 0.22, '': 0.15, 'y': 0.07, 'X': 0.06}	6518	1.71131e-08	0.433594	0.935049	original		0.02	FALSE	FALSE	FALSE	out-of-context	{}
Mathematics	math_division2	66 is to 33 as 64 is to	32	x	0.43	0	0	{'x': 0.43, 'y': 0.18, 'what': 0.17, '': 0.07, 'X': 0.04}	3992	7.17118e-08	0.431641	0.96022	original		0.02	FALSE	FALSE	FALSE	out-of-context	{}
Mathematics	math_double	32 is to 64 as 28 is to	56	x	0.42	0	0	{'x': 0.42, 'what': 0.27, 'y': 0.12, '': 0.06, 'X': 0.05}	2955	7.54371e-08	0.419922	0.970554	original		0.02	FALSE	FALSE	FALSE	out-of-context	{}
Mathematics	math_double	32 is to 64 as 16 is to	32	x	0.42	0	0	{'x': 0.42, 'what': 0.18, '': 0.15, 'y': 0.07, 'X': 0.06}	1224	4.30271e-07	0.416015	0.987803	original		0.02	FALSE	FALSE	FALSE	out-of-context	{}
Mathematics	math_double	18 is to 36 as 28 is to	56	x	0.42	0	0	{'x': 0.42, 'y': 0.23, 'what': 0.22, '': 0.05, 'X': 0.03}	1709	5.00586e-08	0.419922	0.98297	original		0.02	FALSE	FALSE	FALSE	out-of-context	{}
Mathematics	math_double	18 is to 36 as 16 is to	32	x	0.42	0	0	{'x': 0.42, 'what': 0.24, 'y': 0.18, '': 0.07, 'X': 0.03}	2586	3.58559e-08	0.421875	0.974231	original		0.02	FALSE	FALSE	FALSE	out-of-context	{}
Mathematics	math_division2	98 is to 49 as 46 is to	23	x	0.42	0	0	{'x': 0.42, 'y': 0.15, 'what': 0.15, '': 0.14, 'X': 0.03}	2875	8.47504e-08	0.421875	0.971351	original		0.02	FALSE	FALSE	FALSE	out-of-context	{}
Mathematics	math_division2	68 is to 34 as 28 is to	14	x	0.42	0	0	{'x': 0.42, 'y': 0.18, 'what': 0.16, '': 0.12, '\\(': 0.03}	787	4.26546e-07	0.421875	0.992158	original		0.02	FALSE	FALSE	FALSE	out-of-context	{}
Mathematics	math_double	14 is to 28 as 16 is to	32	x	0.41	0	0	{'x': 0.41, 'y': 0.2, 'what': 0.17, '': 0.09, 'X': 0.05}	1341	1.15484e-07	0.410156	0.986637	original		0.02	FALSE	FALSE	FALSE	out-of-context	{}
Mathematics	math_double	16 is to 32 as 30 is to	60	x	0.41	0	0	{'x': 0.41, 'what': 0.25, 'y': 0.17, '': 0.07, 'X': 0.04}	1035	1.77883e-07	0.40625	0.989686	original		0.02	FALSE	FALSE	FALSE	out-of-context	{}
Mathematics	math_double	16 is to 32 as 74 is to	148	x	0.41	0	0	{'x': 0.41, 'what': 0.23, '': 0.16, 'X': 0.07, 'y': 0.06}	9197	1.04192e-08	0.414062	0.908353	original		0.02	FALSE	FALSE	FALSE	out-of-context	{}
Mathematics	math_double	28 is to 56 as 24 is to	48	x	0.41	0	0	{'x': 0.41, 'what': 0.33, 'y': 0.14, 'X': 0.04, '': 0.04}	1375	9.03383e-08	0.410156	0.986298	original		0.02	FALSE	FALSE	FALSE	out-of-context	{}
Mathematics	math_division2	68 is to 34 as 64 is to	32	x	0.41	0	0	{'x': 0.41, 'y': 0.18, 'what': 0.16, '': 0.1, 'X': 0.04}	3152	7.54371e-08	0.410156	0.968591	original		0.02	FALSE	FALSE	FALSE	out-of-context	{}
Mathematics	math_division2	58 is to 29 as 26 is to	13	x	0.41	0	0	{'x': 0.41, 'y': 0.22, 'what': 0.17, '': 0.1, '\\(': 0.02}	1509	1.38767e-07	0.414062	0.984963	original		0.02	FALSE	FALSE	FALSE	out-of-context	{}
Mathematics	math_division2	64 is to 32 as 62 is to	31	x	0.41	0	0	{'x': 0.41, 'what': 0.16, 'y': 0.13, '': 0.09, 'X': 0.07}	2232	1.99303e-07	0.414062	0.977758	original		0.02	FALSE	FALSE	FALSE	out-of-context	{}
Mathematics	math_double	46 is to 92 as 28 is to	56	x	0.4	0	0	{'x': 0.4, 'what': 0.31, 'y': 0.16, '': 0.06, '\\(': 0.02}	1551	6.65896e-08	0.402344	0.984544	original		0.02	FALSE	FALSE	FALSE	out-of-context	{}
Mathematics	math_double	66 is to 132 as 56 is to	112	x	0.4	0	0	{'x': 0.4, 'what': 0.22, 'y': 0.16, '': 0.12, 'X': 0.03}	8499	1.12923e-08	0.396484	0.915308	original		0.02	FALSE	FALSE	FALSE	out-of-context	{}
Mathematics	math_division2	44 is to 22 as 46 is to	23	x	0.4	0	0	{'x': 0.4, 'y': 0.2, 'what': 0.17, '': 0.1, 'X': 0.03}	1724	1.65775e-07	0.396484	0.98282	original		0.02	FALSE	FALSE	FALSE	out-of-context	{}
Mathematics	math_division2	58 is to 29 as 50 is to	25	x	0.4	0	0	{'x': 0.4, 'y': 0.23, 'what': 0.17, '': 0.08, '\\(': 0.03}	1176	2.12342e-07	0.398437	0.988281	original		0.02	FALSE	FALSE	FALSE	out-of-context	{}
Mathematics	math_division2	62 is to 31 as 46 is to	23	x	0.4	0	0	{'x': 0.4, 'y': 0.2, 'what': 0.2, '': 0.1, 'Y': 0.03}	1380	9.91859e-08	0.404297	0.986248	original		0.02	FALSE	FALSE	FALSE	out-of-context	{}
Mathematics	math_double	44 is to 88 as 56 is to	112	x	0.39	0	0	{'x': 0.39, 'what': 0.21, 'y': 0.2, '': 0.09, 'X': 0.03}	6112	1.97906e-08	0.388672	0.939094	original		0.02	FALSE	FALSE	FALSE	out-of-context	{}
Mathematics	math_double	44 is to 88 as 74 is to	148	x	0.39	0	0	{'x': 0.39, 'what': 0.22, 'y': 0.17, '': 0.1, '\\(': 0.03}	7889	1.43191e-08	0.388672	0.921387	original		0.02	FALSE	FALSE	FALSE	out-of-context	{}
Mathematics	math_double	44 is to 88 as 28 is to	56	x	0.39	0	0	{'x': 0.39, 'what': 0.22, 'y': 0.18, '': 0.1, 'X': 0.03}	1283	1.78814e-07	0.392578	0.987215	original		0.02	FALSE	FALSE	FALSE	out-of-context	{}
Mathematics	math_double	94 is to 188 as 74 is to	148	x	0.39	0	0	{'x': 0.39, 'what': 0.29, '': 0.12, 'y': 0.12, 'X': 0.02}	6210	1.55997e-08	0.388672	0.938118	original		0.02	FALSE	FALSE	FALSE	out-of-context	{}
Mathematics	math_double	76 is to 152 as 74 is to	148	x	0.39	0	0	{'x': 0.39, 'what': 0.31, 'y': 0.13, '': 0.09, '\\(': 0.02}	6844	1.53668e-08	0.388672	0.9318	original		0.02	FALSE	FALSE	FALSE	out-of-context	{}
Mathematics	math_squares	28 is to 784 as 25 is to	625	x	0.39	0	0	{'x': 0.39, 'what': 0.21, '': 0.13, 'y': 0.07, 'X': 0.07}	1779	2.38419e-07	0.392578	0.982272	original		0.02	FALSE	FALSE	FALSE	out-of-context	{}
Mathematics	math_division2	68 is to 34 as 62 is to	31	x	0.39	0	0	{'x': 0.39, 'y': 0.19, 'what': 0.16, '': 0.13, '\\(': 0.03}	3958	4.51691e-08	0.392578	0.960559	original		0.02	FALSE	FALSE	FALSE	out-of-context	{}
Mathematics	math_division2	58 is to 29 as 76 is to	38	x	0.38	0	0	{'x': 0.38, 'y': 0.27, 'what': 0.22, '': 0.05, 'Y': 0.03}	4675	1.72295e-08	0.376953	0.953414	original		0.02	FALSE	FALSE	FALSE	out-of-context	{}
Mathematics	math_double	15 is to 30 as 30 is to	60	x	0.37	0	0	{'x': 0.37, '': 0.29, 'y': 0.1, 'what': 0.09, 'X': 0.08}	504	9.23872e-07	0.36914	0.994978	original		0.02	FALSE	FALSE	FALSE	out-of-context	{}
Mathematics	math_division2	58 is to 29 as 46 is to	23	x	0.37	0	0	{'x': 0.37, 'y': 0.22, 'what': 0.22, '': 0.1, 'Y': 0.02}	1628	9.49949e-08	0.367187	0.983777	original		0.02	FALSE	FALSE	FALSE	out-of-context	{}
Mathematics	math_division2	66 is to 33 as 34 is to	17	x	0.37	0	0	{'x': 0.37, 'what': 0.21, '': 0.15, 'y': 0.13, 'X': 0.04}	2044	1.56462e-07	0.36914	0.979632	original		0.02	FALSE	FALSE	FALSE	out-of-context	{}
Mathematics	math_double	46 is to 92 as 85 is to	170	x	0.36	0	0	{'x': 0.36, 'what': 0.29, 'y': 0.19, '': 0.07, '\\(': 0.04}	2373	5.3551e-08	0.361328	0.976353	original		0.02	FALSE	FALSE	FALSE	out-of-context	{}
Mathematics	math_double	46 is to 92 as 74 is to	148	x	0.36	0	0	{'x': 0.36, 'what': 0.34, 'y': 0.17, '': 0.06, '\\(': 0.03}	8902	5.58794e-09	0.359375	0.911292	original		0.02	FALSE	FALSE	FALSE	out-of-context	{}
Mathematics	math_double	15 is to 30 as 16 is to	32	x	0.36	0	0	{'x': 0.36, 'y': 0.24, 'what': 0.19, '': 0.12, 'X': 0.03}	1430	5.56465e-08	0.363281	0.98575	original		0.02	FALSE	FALSE	FALSE	out-of-context	{}
Mathematics	math_double	16 is to 32 as 28 is to	56	x	0.36	0	0	{'x': 0.36, 'what': 0.28, 'y': 0.21, '': 0.05, 'X': 0.04}	1517	8.70787e-08	0.355469	0.984883	original		0.02	FALSE	FALSE	FALSE	out-of-context	{}
Mathematics	math_double	98 is to 196 as 16 is to	32	x	0.36	0	0	{'x': 0.36, '': 0.25, 'what': 0.2, 'y': 0.06, 'X': 0.04}	2222	1.1269e-07	0.363281	0.977858	original		0.02	FALSE	FALSE	FALSE	out-of-context	{}
Mathematics	math_double	98 is to 196 as 28 is to	56	x	0.36	0	0	{'x': 0.36, 'what': 0.3, '': 0.13, 'y': 0.09, 'X': 0.03}	1249	2.21655e-07	0.357422	0.987554	original		0.02	FALSE	FALSE	FALSE	out-of-context	{}
Mathematics	math_double	98 is to 196 as 74 is to	148	x	0.35	0	0	{'x': 0.35, 'what': 0.31, 'y': 0.13, '': 0.11, '\\(': 0.03}	7210	1.29803e-08	0.347656	0.928153	original		0.02	FALSE	FALSE	FALSE	out-of-context	{}
Mathematics	math_division2	58 is to 29 as 62 is to	31	x	0.34	0	0	{'x': 0.34, 'y': 0.3, 'what': 0.17, '': 0.08, 'Y': 0.03}	3969	3.84171e-08	0.341797	0.960449	original		0.02	FALSE	FALSE	FALSE	out-of-context	{}
Mathematics	math_double	98 is to 196 as 85 is to	170	x	0.33	0	0	{'x': 0.33, 'what': 0.29, 'y': 0.15, '': 0.11, '\\(': 0.03}	1953	9.82545e-08	0.333984	0.980539	original		0.02	FALSE	FALSE	FALSE	out-of-context	{}
Mathematics	math_double	12 is to 24 as 24 is to	48		0.32	0	0	{'': 0.32, 'x': 0.31, 'what': 0.12, 'y': 0.06, 'X': 0.05}	1103	8.19564e-07	0.320312	0.989009	original		0.02	FALSE	FALSE	FALSE	out-of-context	{}
Mathematics	math_squares	26 is to 676 as 25 is to	625		0.3	0	0	{'': 0.3, 'what': 0.3, 'x': 0.15, '?': 0.07, 'X': 0.03}	491	3.62098e-06	0.304684	0.995107	original		0.02	FALSE	FALSE	FALSE	out-of-context	{}
Mathematics	math_division10	70 is to 7 as 100 is to	10	x	0.82	0	0	{'x': 0.82, 'y': 0.05, 'what': 0.04, '': 0.02, '\\(': 0.02}	1747	7.91624e-08	0.820312	0.982591	original		0.01	FALSE	FALSE	FALSE	out-of-context	{}
Mathematics	math_division10	40 is to 4 as 20 is to	2	x	0.82	0	0	{'x': 0.82, 'y': 0.08, 'what': 0.03, '': 0.02, '\\(': 0.01}	614	2.49594e-07	0.816406	0.993882	original		0.01	FALSE	FALSE	FALSE	out-of-context	{}
Mathematics	math_division5	100 is to 20 as 5 is to	1	x	0.81	0	0	{'x': 0.81, 'y': 0.04, 'what': 0.04, '': 0.04, 'X': 0.03}	639	3.61353e-07	0.8125	0.993632	original		0.01	FALSE	FALSE	FALSE	out-of-context	{}
Mathematics	math_division10	70 is to 7 as 20 is to	2	x	0.8	0	0	{'x': 0.8, 'y': 0.08, 'what': 0.03, '': 0.03, '\\(': 0.01}	1409	1.62981e-07	0.796875	0.985959	original		0.01	FALSE	FALSE	FALSE	out-of-context	{}
Mathematics	math_division10	60 is to 6 as 20 is to	2	x	0.8	0	0	{'x': 0.8, 'y': 0.1, 'what': 0.03, '': 0.03, 'X': 0.01}	1117	1.32248e-07	0.796875	0.988869	original		0.01	FALSE	FALSE	FALSE	out-of-context	{}
Mathematics	math_division10	40 is to 4 as 10 is to	1	x	0.8	0	0	{'x': 0.8, 'y': 0.08, 'what': 0.03, '': 0.02, '\\(': 0.02}	457	5.69969e-07	0.800781	0.995446	original		0.01	FALSE	FALSE	FALSE	out-of-context	{}
Mathematics	math_squares	30 is to 900 as 5 is to	25	x	0.79	0	0	{'x': 0.79, '': 0.09, 'what': 0.04, 'y': 0.03, 'the': 0.02}	1137	9.77889e-08	0.789062	0.98867	original		0.01	FALSE	FALSE	FALSE	out-of-context	{}
Mathematics	math_division5	20 is to 4 as 100 is to	20	x	0.79	0	0	{'x': 0.79, 'y': 0.08, 'what': 0.05, 'X': 0.02, '': 0.02}	2596	2.49129e-08	0.789062	0.974131	original		0.01	FALSE	FALSE	FALSE	out-of-context	{}
Mathematics	math_division2	100 is to 50 as 6 is to	3	x	0.79	0	0	{'x': 0.79, 'what': 0.06, '': 0.05, 'y': 0.05, 'X': 0.02}	849	1.77883e-07	0.785156	0.99154	original		0.01	FALSE	FALSE	FALSE	out-of-context	{}
Mathematics	math_division10	70 is to 7 as 30 is to	3	x	0.79	0	0	{'x': 0.79, 'y': 0.09, 'what': 0.04, '': 0.03, '\\(': 0.01}	911	2.71946e-07	0.785156	0.990922	original		0.01	FALSE	FALSE	FALSE	out-of-context	{}
Mathematics	math_division5	100 is to 20 as 65 is to	13	x	0.79	0	0	{'x': 0.79, 'y': 0.07, 'what': 0.04, 'X': 0.04, '': 0.02}	4703	1.2049e-08	0.792969	0.953135	original		0.01	FALSE	FALSE	FALSE	out-of-context	{}
Mathematics	math_division5	15 is to 3 as 100 is to	20	x	0.78	0	0	{'x': 0.78, 'y': 0.09, 'what': 0.04, '': 0.02, 'X': 0.02}	3685	1.4028e-08	0.777344	0.963279	original		0.01	FALSE	FALSE	FALSE	out-of-context	{}
Mathematics	math_division5	20 is to 4 as 85 is to	17	x	0.78	0	0	{'x': 0.78, 'y': 0.09, 'what': 0.05, '': 0.03, 'X': 0.02}	2419	2.35159e-08	0.777344	0.975895	original		0.01	FALSE	FALSE	FALSE	out-of-context	{}
Mathematics	math_division5	40 is to 8 as 100 is to	20	x	0.78	0	0	{'x': 0.78, 'y': 0.1, 'what': 0.04, '': 0.02, 'X': 0.02}	2994	3.1665e-08	0.777344	0.970165	original		0.01	FALSE	FALSE	FALSE	out-of-context	{}
Mathematics	math_division5	30 is to 6 as 100 is to	20	x	0.78	0	0	{'x': 0.78, 'y': 0.09, 'what': 0.04, '': 0.03, 'X': 0.02}	1871	4.44707e-08	0.777344	0.981356	original		0.01	FALSE	FALSE	FALSE	out-of-context	{}
Mathematics	math_division5	70 is to 14 as 100 is to	20	x	0.78	0	0	{'x': 0.78, 'what': 0.05, 'y': 0.04, '': 0.04, 'X': 0.03}	2751	4.77303e-08	0.78125	0.972586	original		0.01	FALSE	FALSE	FALSE	out-of-context	{}
Mathematics	math_division5	100 is to 20 as 85 is to	17	x	0.78	0	0	{'x': 0.78, 'y': 0.07, 'what': 0.07, 'X': 0.03, '': 0.02}	4071	1.01281e-08	0.777344	0.959433	original		0.01	FALSE	FALSE	FALSE	out-of-context	{}
Mathematics	math_double	30 is to 60 as 10 is to	20	x	0.77	0	0	{'x': 0.77, 'y': 0.08, '': 0.06, 'what': 0.04, 'X': 0.03}	1028	9.77889e-08	0.765625	0.989756	original		0.01	FALSE	FALSE	FALSE	out-of-context	{}
Mathematics	math_double	60 is to 120 as 15 is to	30	x	0.77	0	0	{'x': 0.77, 'y': 0.06, '': 0.06, 'X': 0.04, 'what': 0.03}	895	8.42847e-08	0.765625	0.991081	original		0.01	FALSE	FALSE	FALSE	out-of-context	{}
Mathematics	math_division2	30 is to 15 as 70 is to	35	x	0.77	0	0	{'x': 0.77, 'y': 0.08, 'what': 0.05, '': 0.05, 'X': 0.03}	2355	2.28174e-08	0.765625	0.976533	original		0.01	FALSE	FALSE	FALSE	out-of-context	{}
Mathematics	math_division2	30 is to 15 as 2 is to	1	x	0.77	0	0	{'x': 0.77, '': 0.12, 'what': 0.04, 'X': 0.02, 'y': 0.02}	493	4.60073e-07	0.769531	0.995087	original		0.01	FALSE	FALSE	FALSE	out-of-context	{}
Mathematics	math_squares	30 is to 900 as 10 is to	100	x	0.77	0	0	{'x': 0.77, 'what': 0.06, 'y': 0.05, '': 0.04, 'X': 0.03}	520	2.68221e-07	0.765625	0.994818	original		0.01	FALSE	FALSE	FALSE	out-of-context	{}
Mathematics	math_division2	14 is to 7 as 96 is to	48	x	0.77	0	0	{'x': 0.77, 'y': 0.11, 'what': 0.03, 'X': 0.02, '': 0.02}	6321	1.07684e-08	0.765625	0.937012	original		0.01	FALSE	FALSE	FALSE	out-of-context	{}
Mathematics	math_division5	20 is to 4 as 15 is to	3	x	0.77	0	0	{'x': 0.77, 'y': 0.09, 'what': 0.05, '': 0.03, 'X': 0.02}	1002	9.59262e-08	0.765625	0.990015	original		0.01	FALSE	FALSE	FALSE	out-of-context	{}
Mathematics	math_division5	30 is to 6 as 15 is to	3	x	0.77	0	0	{'x': 0.77, 'y': 0.09, '': 0.06, 'what': 0.03, 'X': 0.01}	767	1.95578e-07	0.773437	0.992357	original		0.01	FALSE	FALSE	FALSE	out-of-context	{}
Mathematics	math_division5	35 is to 7 as 100 is to	20	x	0.77	0	0	{'x': 0.77, 'y': 0.08, 'what': 0.05, 'X': 0.03, '': 0.02}	2882	3.23635e-08	0.769531	0.971281	original		0.01	FALSE	FALSE	FALSE	out-of-context	{}
Mathematics	math_division2	100 is to 50 as 8 is to	4	x	0.77	0	0	{'x': 0.77, 'what': 0.07, '': 0.06, 'y': 0.05, 'X': 0.02}	1115	1.31316e-07	0.773437	0.988889	original		0.01	FALSE	FALSE	FALSE	out-of-context	{}
Mathematics	math_division10	60 is to 6 as 40 is to	4	x	0.77	0	0	{'x': 0.77, 'y': 0.11, 'what': 0.04, '': 0.02, '\\(': 0.01}	678	1.81608e-07	0.773437	0.993244	original		0.01	FALSE	FALSE	FALSE	out-of-context	{}
Mathematics	math_division10	90 is to 9 as 30 is to	3	x	0.77	0	0	{'x': 0.77, 'y': 0.09, 'what': 0.05, '': 0.03, 'X': 0.01}	875	2.68221e-07	0.765625	0.991281	original		0.01	FALSE	FALSE	FALSE	out-of-context	{}
Mathematics	math_division5	60 is to 12 as 5 is to	1	x	0.77	0	0	{'x': 0.77, 'y': 0.06, '': 0.05, 'what': 0.04, 'the': 0.02}	1204	1.71363e-07	0.765625	0.988002	original		0.01	FALSE	FALSE	FALSE	out-of-context	{}
Mathematics	math_division2	86 is to 43 as 6 is to	3	x	0.77	0	0	{'x': 0.77, 'y': 0.07, '': 0.06, 'what': 0.04, 'X': 0.02}	471	5.25266e-07	0.773437	0.995307	original		0.01	FALSE	FALSE	FALSE	out-of-context	{}
Mathematics	math_double	35 is to 70 as 15 is to	30	x	0.76	0	0	{'x': 0.76, '': 0.07, 'y': 0.06, 'what': 0.04, 'X': 0.03}	1029	1.09896e-07	0.761719	0.989746	original		0.01	FALSE	FALSE	FALSE	out-of-context	{}
Mathematics	math_division2	24 is to 12 as 96 is to	48	x	0.76	0	0	{'x': 0.76, 'y': 0.09, 'what': 0.06, '': 0.03, 'X': 0.02}	3497	2.02563e-08	0.761719	0.965153	original		0.01	FALSE	FALSE	FALSE	out-of-context	{}
Mathematics	math_division2	30 is to 15 as 80 is to	40	x	0.76	0	0	{'x': 0.76, 'y': 0.09, '': 0.04, 'what': 0.04, 'X': 0.03}	883	9.40636e-08	0.761719	0.991201	original		0.01	FALSE	FALSE	FALSE	out-of-context	{}
Mathematics	math_division5	30 is to 6 as 85 is to	17	x	0.76	0	0	{'x': 0.76, 'y': 0.11, '': 0.05, 'what': 0.04, 'X': 0.02}	1777	4.35393e-08	0.757812	0.982292	original		0.01	FALSE	FALSE	FALSE	out-of-context	{}
Mathematics	math_division5	60 is to 12 as 100 is to	20	x	0.76	0	0	{'x': 0.76, 'y': 0.09, 'what': 0.04, 'X': 0.03, 'the': 0.02}	3013	3.42261e-08	0.761719	0.969976	original		0.01	FALSE	FALSE	FALSE	out-of-context	{}
Mathematics	math_division5	60 is to 12 as 10 is to	2	x	0.76	0	0	{'x': 0.76, 'y': 0.1, '': 0.03, 'what': 0.03, 'the': 0.02}	1694	8.84756e-08	0.761719	0.983119	original		0.01	FALSE	FALSE	FALSE	out-of-context	{}
Mathematics	math_division2	80 is to 40 as 6 is to	3	x	0.76	0	0	{'x': 0.76, '': 0.09, 'y': 0.05, 'what': 0.04, 'X': 0.02}	697	2.62633e-07	0.761718	0.993054	original		0.01	FALSE	FALSE	FALSE	out-of-context	{}
Mathematics	math_double	35 is to 70 as 10 is to	20	x	0.75	0	0	{'x': 0.75, '': 0.07, 'y': 0.06, 'what': 0.05, 'X': 0.02}	1084	1.0198e-07	0.75	0.989198	original		0.01	FALSE	FALSE	FALSE	out-of-context	{}
Mathematics	math_double	65 is to 130 as 15 is to	30	x	0.75	0	0	{'x': 0.75, '': 0.06, 'y': 0.06, 'what': 0.05, 'X': 0.04}	1432	6.65896e-08	0.75	0.98573	original		0.01	FALSE	FALSE	FALSE	out-of-context	{}
Mathematics	math_division2	30 is to 15 as 50 is to	25	x	0.75	0	0	{'x': 0.75, 'y': 0.08, '': 0.06, 'X': 0.04, 'what': 0.03}	556	1.79745e-07	0.753906	0.99446	original		0.01	FALSE	FALSE	FALSE	out-of-context	{}
Mathematics	math_division2	30 is to 15 as 8 is to	4	x	0.75	0	0	{'x': 0.75, 'what': 0.08, '': 0.06, 'y': 0.06, 'X': 0.02}	1101	1.0943e-07	0.746094	0.989029	original		0.01	FALSE	FALSE	FALSE	out-of-context	{}
Mathematics	math_division2	30 is to 15 as 60 is to	30	x	0.75	0	0	{'x': 0.75, 'y': 0.11, 'what': 0.04, '': 0.03, 'X': 0.03}	1984	3.84171e-08	0.75	0.98023	original		0.01	FALSE	FALSE	FALSE	out-of-context	{}
Mathematics	math_division2	28 is to 14 as 8 is to	4	x	0.75	0	0	{'x': 0.75, 'what': 0.07, '': 0.06, 'y': 0.04, 'X': 0.02}	719	4.26546e-07	0.746093	0.992835	original		0.01	FALSE	FALSE	FALSE	out-of-context	{}
Mathematics	math_squares	15 is to 225 as 5 is to	25	x	0.75	0	0	{'x': 0.75, '': 0.12, 'what': 0.04, 'the': 0.03, 'y': 0.03}	1223	1.0943e-07	0.746094	0.987813	original		0.01	FALSE	FALSE	FALSE	out-of-context	{}
Mathematics	math_division2	20 is to 10 as 80 is to	40	x	0.75	0	0	{'x': 0.75, 'y': 0.09, 'what': 0.07, '': 0.03, 'X': 0.02}	1072	9.96515e-08	0.75	0.989318	original		0.01	FALSE	FALSE	FALSE	out-of-context	{}
Mathematics	math_division2	10 is to 5 as 60 is to	30	x	0.75	0	0	{'x': 0.75, 'y': 0.11, 'what': 0.05, 'X': 0.02, '': 0.02}	3877	2.35159e-08	0.753906	0.961366	original		0.01	FALSE	FALSE	FALSE	out-of-context	{}
Mathematics	math_division5	15 is to 3 as 65 is to	13	x	0.75	0	0	{'x': 0.75, 'y': 0.09, '': 0.05, 'what': 0.04, 'X': 0.02}	3027	2.78233e-08	0.75	0.969836	original		0.01	FALSE	FALSE	FALSE	out-of-context	{}
Mathematics	math_division5	30 is to 6 as 65 is to	13	x	0.75	0	0	{'x': 0.75, 'y': 0.1, '': 0.06, 'what': 0.03, 'X': 0.02}	1472	7.68341e-08	0.75	0.985332	original		0.01	FALSE	FALSE	FALSE	out-of-context	{}
Mathematics	math_division2	100 is to 50 as 66 is to	33	x	0.75	0	0	{'x': 0.75, 'y': 0.07, 'what': 0.07, 'X': 0.03, '': 0.03}	7805	5.67525e-09	0.746094	0.922224	original		0.01	FALSE	FALSE	FALSE	out-of-context	{}
Mathematics	math_division5	60 is to 12 as 85 is to	17	x	0.75	0	0	{'x': 0.75, 'y': 0.11, 'what': 0.04, '': 0.03, 'X': 0.02}	2569	2.39816e-08	0.753906	0.9744	original		0.01	FALSE	FALSE	FALSE	out-of-context	{}
Mathematics	math_division5	65 is to 13 as 100 is to	20	x	0.75	0	0	{'x': 0.75, 'y': 0.07, 'X': 0.04, 'what': 0.03, '\\(': 0.03}	3730	2.85218e-08	0.75	0.962831	original		0.01	FALSE	FALSE	FALSE	out-of-context	{}
Mathematics	math_division10	10 is to 1 as 40 is to	4	x	0.75	0	0	{'x': 0.75, 'y': 0.09, 'X': 0.04, '': 0.04, 'what': 0.03}	1252	2.08616e-07	0.75	0.987524	original		0.01	FALSE	FALSE	FALSE	out-of-context	{}
Mathematics	math_division10	30 is to 3 as 20 is to	2	x	0.75	0	0	{'x': 0.75, 'y': 0.11, 'what': 0.05, '': 0.04, 'X': 0.02}	1087	8.5216e-08	0.75	0.989168	original		0.01	FALSE	FALSE	FALSE	out-of-context	{}
Mathematics	math_division2	70 is to 35 as 8 is to	4	x	0.75	0	0	{'x': 0.75, '': 0.09, 'y': 0.06, 'what': 0.04, 'X': 0.01}	1422	1.66707e-07	0.746094	0.98583	original		0.01	FALSE	FALSE	FALSE	out-of-context	{}
Mathematics	math_double	65 is to 130 as 10 is to	20	x	0.74	0	0	{'x': 0.74, 'what': 0.07, '': 0.07, 'y': 0.06, 'X': 0.03}	1408	5.70435e-08	0.738281	0.985969	original		0.01	FALSE	FALSE	FALSE	out-of-context	{}
Mathematics	math_double	60 is to 120 as 10 is to	20	x	0.74	0	0	{'x': 0.74, 'y': 0.08, '': 0.06, 'what': 0.05, 'X': 0.03}	772	1.22003e-07	0.742187	0.992307	original		0.01	FALSE	FALSE	FALSE	out-of-context	{}
Mathematics	math_division2	30 is to 15 as 96 is to	48	x	0.74	0	0	{'x': 0.74, 'y': 0.09, 'what': 0.05, '': 0.05, 'X': 0.03}	3562	1.69966e-08	0.738281	0.964505	original		0.01	FALSE	FALSE	FALSE	out-of-context	{}
Mathematics	math_division2	52 is to 26 as 8 is to	4	x	0.74	0	0	{'x': 0.74, 'what': 0.1, 'y': 0.06, '': 0.06, 'X': 0.01}	246	1.42306e-06	0.73828	0.997549	original		0.01	FALSE	FALSE	FALSE	out-of-context	{}
Mathematics	math_division2	50 is to 25 as 2 is to	1	x	0.74	0	0	{'x': 0.74, '': 0.13, 'X': 0.03, 'what': 0.03, 'y': 0.02}	450	6.85453e-07	0.738281	0.995516	original		0.01	FALSE	FALSE	FALSE	out-of-context	{}
Mathematics	math_division2	40 is to 20 as 96 is to	48	x	0.74	0	0	{'x': 0.74, 'y': 0.11, '': 0.04, 'what': 0.04, 'X': 0.03}	3261	1.88593e-08	0.742187	0.967504	original		0.01	FALSE	FALSE	FALSE	out-of-context	{}
Mathematics	math_division2	12 is to 6 as 96 is to	48	x	0.74	0	0	{'x': 0.74, 'y': 0.12, '': 0.04, 'what': 0.04, '\\(': 0.01}	3378	2.04891e-08	0.742187	0.966338	original		0.01	FALSE	FALSE	FALSE	out-of-context	{}
Mathematics	math_division5	30 is to 6 as 5 is to	1	x	0.74	0	0	{'x': 0.74, '': 0.08, 'y': 0.07, 'what': 0.05, 'the': 0.02}	728	3.40864e-07	0.742187	0.992746	original		0.01	FALSE	FALSE	FALSE	out-of-context	{}
Mathematics	math_division2	100 is to 50 as 2 is to	1	x	0.74	0	0	{'x': 0.74, '': 0.13, 'what': 0.05, 'X': 0.03, 'y': 0.02}	234	1.83284e-06	0.738279	0.997668	original		0.01	FALSE	FALSE	FALSE	out-of-context	{}
Mathematics	math_division2	100 is to 50 as 4 is to	2	x	0.74	0	0	{'x': 0.74, 'what': 0.08, '': 0.08, 'X': 0.03, 'y': 0.02}	782	2.6077e-07	0.742187	0.992207	original		0.01	FALSE	FALSE	FALSE	out-of-context	{}
Mathematics	math_division2	100 is to 50 as 40 is to	20	x	0.74	0	0	{'x': 0.74, 'y': 0.08, 'what': 0.06, 'X': 0.04, '': 0.02}	2176	3.67872e-08	0.742187	0.978316	original		0.01	FALSE	FALSE	FALSE	out-of-context	{}
Mathematics	math_division5	70 is to 14 as 20 is to	4	x	0.74	0	0	{'x': 0.74, 'y': 0.08, '': 0.06, 'what': 0.04, '\\(': 0.02}	1270	1.55531e-07	0.742187	0.987345	original		0.01	FALSE	FALSE	FALSE	out-of-context	{}
Mathematics	math_double	95 is to 190 as 15 is to	30	x	0.73	0	0	{'x': 0.73, '': 0.06, 'y': 0.06, 'what': 0.04, 'X': 0.03}	2383	6.42613e-08	0.730469	0.976254	original		0.01	FALSE	FALSE	FALSE	out-of-context	{}
Mathematics	math_division2	34 is to 17 as 98 is to	49	x	0.73	0	0	{'x': 0.73, 'y': 0.11, '': 0.04, 'what': 0.04, 'X': 0.03}	1982	4.95929e-08	0.726562	0.98025	original		0.01	FALSE	FALSE	FALSE	out-of-context	{}
Mathematics	math_division2	30 is to 15 as 100 is to	50	x	0.73	0	0	{'x': 0.73, 'y': 0.07, 'what': 0.07, 'X': 0.04, '': 0.04}	2929	2.07219e-08	0.730469	0.970813	original		0.01	FALSE	FALSE	FALSE	out-of-context	{}
Mathematics	math_division2	26 is to 13 as 98 is to	49	x	0.73	0	0	{'x': 0.73, 'y': 0.12, 'what': 0.06, 'X': 0.03, '': 0.02}	2755	1.90921e-08	0.726562	0.972547	original		0.01	FALSE	FALSE	FALSE	out-of-context	{}
Mathematics	math_division2	40 is to 20 as 80 is to	40	x	0.73	0	0	{'x': 0.73, 'y': 0.12, 'what': 0.04, '': 0.04, 'X': 0.03}	492	2.71946e-07	0.726562	0.995097	original		0.01	FALSE	FALSE	FALSE	out-of-context	{}
Mathematics	math_division2	14 is to 7 as 54 is to	27	x	0.73	0	0	{'x': 0.73, 'y': 0.11, 'what': 0.07, '': 0.03, 'X': 0.02}	6131	1.14087e-08	0.726562	0.938905	original		0.01	FALSE	FALSE	FALSE	out-of-context	{}
Mathematics	math_division2	20 is to 10 as 60 is to	30	x	0.73	0	0	{'x': 0.73, 'y': 0.12, 'what': 0.06, '': 0.03, 'X': 0.02}	2166	4.09782e-08	0.730469	0.978416	original		0.01	FALSE	FALSE	FALSE	out-of-context	{}
Mathematics	math_division2	8 is to 4 as 60 is to	30	x	0.73	0	0	{'x': 0.73, 'y': 0.11, 'what': 0.05, 'X': 0.03, '': 0.03}	4421	1.82772e-08	0.726562	0.955945	original		0.01	FALSE	FALSE	FALSE	out-of-context	{}
Mathematics	math_division2	8 is to 4 as 96 is to	48	x	0.73	0	0	{'x': 0.73, 'y': 0.12, 'what': 0.04, '': 0.03, 'X': 0.03}	5407	1.67638e-08	0.730469	0.94612	original		0.01	FALSE	FALSE	FALSE	out-of-context	{}
Mathematics	math_division2	6 is to 3 as 50 is to	25	x	0.73	0	0	{'x': 0.73, 'y': 0.11, 'what': 0.04, '': 0.04, 'X': 0.03}	1924	6.89179e-08	0.726562	0.980827	original		0.01	FALSE	FALSE	FALSE	out-of-context	{}
Mathematics	math_division2	10 is to 5 as 80 is to	40	x	0.73	0	0	{'x': 0.73, 'y': 0.12, 'what': 0.05, 'X': 0.02, '': 0.02}	1902	5.47152e-08	0.734375	0.981047	original		0.01	FALSE	FALSE	FALSE	out-of-context	{}
Mathematics	math_division5	25 is to 5 as 100 is to	20	x	0.73	0	0	{'x': 0.73, 'what': 0.09, 'y': 0.07, 'X': 0.03, '': 0.03}	2230	4.5402e-08	0.726562	0.977778	original		0.01	FALSE	FALSE	FALSE	out-of-context	{}
Mathematics	math_division2	100 is to 50 as 96 is to	48	x	0.73	0	0	{'x': 0.73, 'y': 0.09, 'what': 0.07, 'X': 0.03, '': 0.02}	5460	9.19681e-09	0.734375	0.945592	original		0.01	FALSE	FALSE	FALSE	out-of-context	{}
Mathematics	math_division5	15 is to 3 as 35 is to	7	x	0.73	0	0	{'x': 0.73, 'y': 0.11, '': 0.05, 'what': 0.05, '\\(': 0.02}	512	2.71946e-07	0.726562	0.994898	original		0.01	FALSE	FALSE	FALSE	out-of-context	{}
Mathematics	math_division5	30 is to 6 as 20 is to	4	x	0.73	0	0	{'x': 0.73, 'y': 0.13, '': 0.05, 'what': 0.04, 'X': 0.01}	629	2.49594e-07	0.730469	0.993732	original		0.01	FALSE	FALSE	FALSE	out-of-context	{}
Mathematics	math_division5	35 is to 7 as 95 is to	19	x	0.73	0	0	{'x': 0.73, 'y': 0.12, 'what': 0.05, '': 0.04, '\\(': 0.02}	5149	1.59489e-08	0.730469	0.948691	original		0.01	FALSE	FALSE	FALSE	out-of-context	{}
Mathematics	math_division2	96 is to 48 as 6 is to	3	x	0.73	0	0	{'x': 0.73, '': 0.09, 'what': 0.06, 'y': 0.05, 'X': 0.01}	842	3.18512e-07	0.726562	0.99161	original		0.01	FALSE	FALSE	FALSE	out-of-context	{}
Mathematics	math_division2	100 is to 50 as 80 is to	40	x	0.73	0	0	{'x': 0.73, 'y': 0.09, 'what': 0.07, 'X': 0.03, '\\(': 0.02}	1451	5.86733e-08	0.734375	0.985541	original		0.01	FALSE	FALSE	FALSE	out-of-context	{}
Mathematics	math_division10	90 is to 9 as 100 is to	10	x	0.73	0	0	{'x': 0.73, 'what': 0.07, 'y': 0.07, 'X': 0.03, '': 0.03}	1588	1.53668e-07	0.730469	0.984176	original		0.01	FALSE	FALSE	FALSE	out-of-context	{}
Mathematics	math_division10	50 is to 5 as 40 is to	4	x	0.73	0	0	{'x': 0.73, 'y': 0.1, 'what': 0.06, '': 0.04, '\\(': 0.02}	1360	1.07102e-07	0.726562	0.986448	original		0.01	FALSE	FALSE	FALSE	out-of-context	{}
Mathematics	math_division5	70 is to 14 as 95 is to	19	x	0.73	0	0	{'x': 0.73, 'y': 0.11, '': 0.05, 'what': 0.04, '\\(': 0.02}	3593	2.2701e-08	0.734375	0.964196	original		0.01	FALSE	FALSE	FALSE	out-of-context	{}
Mathematics	math_division2	70 is to 35 as 4 is to	2	x	0.73	0	0	{'x': 0.73, '': 0.12, 'what': 0.05, 'X': 0.03, 'y': 0.02}	1221	1.99303e-07	0.726562	0.987833	original		0.01	FALSE	FALSE	FALSE	out-of-context	{}
Mathematics	math_division2	68 is to 34 as 34 is to	17		0.73	0	0	{'': 0.73, 'x': 0.08, 'what': 0.06, 'X': 0.03, 'the': 0.01}	748	1.63913e-06	0.726561	0.992546	original		0.01	FALSE	FALSE	FALSE	out-of-context	{}
Mathematics	math_division2	72 is to 36 as 8 is to	4	x	0.73	0	0	{'x': 0.73, '': 0.09, 'what': 0.08, 'y': 0.05, '\\(': 0.01}	768	3.05474e-07	0.730468	0.992347	original		0.01	FALSE	FALSE	FALSE	out-of-context	{}
Mathematics	math_division2	72 is to 36 as 6 is to	3	x	0.73	0	0	{'x': 0.73, '': 0.09, 'what': 0.07, 'y': 0.05, '\\(': 0.01}	874	2.68221e-07	0.726562	0.991291	original		0.01	FALSE	FALSE	FALSE	out-of-context	{}
Mathematics	math_division2	90 is to 45 as 70 is to	35	x	0.73	0	0	{'x': 0.73, 'y': 0.12, 'what': 0.05, '': 0.03, '\\(': 0.02}	2557	2.37487e-08	0.726562	0.97452	original		0.01	FALSE	FALSE	FALSE	out-of-context	{}
Mathematics	math_division2	90 is to 45 as 8 is to	4	x	0.73	0	0	{'x': 0.73, '': 0.08, 'y': 0.07, 'what': 0.06, 'X': 0.01}	1265	1.53668e-07	0.734375	0.987394	original		0.01	FALSE	FALSE	FALSE	out-of-context	{}
Mathematics	math_division2	90 is to 45 as 2 is to	1	x	0.73	0	0	{'x': 0.73, '': 0.17, 'X': 0.03, 'what': 0.03, 'y': 0.01}	278	1.31875e-06	0.726561	0.99723	original		0.01	FALSE	FALSE	FALSE	out-of-context	{}
Mathematics	math_division2	82 is to 41 as 6 is to	3	x	0.73	0	0	{'x': 0.73, 'what': 0.09, '': 0.07, 'y': 0.06, 'X': 0.02}	604	2.98023e-07	0.734375	0.993981	original		0.01	FALSE	FALSE	FALSE	out-of-context	{}
Mathematics	math_double	100 is to 200 as 15 is to	30	x	0.72	0	0	{'x': 0.72, '': 0.08, 'X': 0.08, 'what': 0.06, 'y': 0.03}	786	9.40636e-08	0.71875	0.992168	original		0.01	FALSE	FALSE	FALSE	out-of-context	{}
Mathematics	math_double	75 is to 150 as 50 is to	100	x	0.72	0	0	{'x': 0.72, 'X': 0.06, 'y': 0.06, 'what': 0.05, '': 0.05}	485	2.84985e-07	0.71875	0.995167	original		0.01	FALSE	FALSE	FALSE	out-of-context	{}
Mathematics	math_double	75 is to 150 as 35 is to	70	x	0.72	0	0	{'x': 0.72, 'what': 0.07, 'y': 0.06, '': 0.06, 'X': 0.04}	1585	5.72763e-08	0.71875	0.984206	original		0.01	FALSE	FALSE	FALSE	out-of-context	{}
Mathematics	math_double	70 is to 140 as 50 is to	100	x	0.72	0	0	{'x': 0.72, '': 0.1, 'y': 0.06, 'what': 0.04, 'X': 0.04}	277	6.07222e-07	0.718749	0.99724	original		0.01	FALSE	FALSE	FALSE	out-of-context	{}
Mathematics	math_double	70 is to 140 as 30 is to	60	x	0.72	0	0	{'x': 0.72, '': 0.07, 'y': 0.07, 'what': 0.06, 'X': 0.03}	816	1.32248e-07	0.71875	0.991869	original		0.01	FALSE	FALSE	FALSE	out-of-context	{}
Mathematics	math_division2	50 is to 25 as 8 is to	4	x	0.72	0	0	{'x': 0.72, '': 0.08, 'what': 0.06, 'y': 0.06, 'the': 0.02}	1201	1.28523e-07	0.722656	0.988032	original		0.01	FALSE	FALSE	FALSE	out-of-context	{}
Mathematics	math_division2	40 is to 20 as 60 is to	30	x	0.72	0	0	{'x': 0.72, 'y': 0.13, '': 0.04, 'what': 0.04, 'X': 0.03}	950	1.10362e-07	0.71875	0.990533	original		0.01	FALSE	FALSE	FALSE	out-of-context	{}
Mathematics	math_division2	40 is to 20 as 100 is to	50	x	0.72	0	0	{'x': 0.72, 'y': 0.1, 'what': 0.05, 'X': 0.04, '': 0.04}	1920	6.23986e-08	0.722656	0.980867	original		0.01	FALSE	FALSE	FALSE	out-of-context	{}
Mathematics	math_squares	30 is to 900 as 18 is to	324	x	0.72	0	0	{'x': 0.72, 'what': 0.09, 'y': 0.08, '': 0.04, 'X': 0.03}	13516	1.11322e-09	0.71875	0.865314	original		0.01	FALSE	FALSE	FALSE	out-of-context	{}
Mathematics	math_squares	30 is to 900 as 12 is to	144	x	0.72	0	0	{'x': 0.72, 'what': 0.08, 'y': 0.07, '': 0.05, 'X': 0.03}	5058	8.96398e-09	0.722656	0.949597	original		0.01	FALSE	FALSE	FALSE	out-of-context	{}
Mathematics	math_squares	20 is to 400 as 5 is to	25	x	0.72	0	0	{'x': 0.72, '': 0.12, 'X': 0.04, 'what': 0.04, 'y': 0.03}	1172	1.53668e-07	0.71875	0.988321	original		0.01	FALSE	FALSE	FALSE	out-of-context	{}
Mathematics	math_division2	14 is to 7 as 56 is to	28	x	0.72	0	0	{'x': 0.72, 'y': 0.12, 'what': 0.06, '': 0.02, 'X': 0.02}	4725	2.01399e-08	0.71875	0.952916	original		0.01	FALSE	FALSE	FALSE	out-of-context	{}
Mathematics	math_division2	14 is to 7 as 100 is to	50	x	0.72	0	0	{'x': 0.72, 'y': 0.1, 'X': 0.05, 'what': 0.04, '': 0.02}	5726	1.6531e-08	0.722656	0.942941	original		0.01	FALSE	FALSE	FALSE	out-of-context	{}
Mathematics	math_division2	20 is to 10 as 70 is to	35	x	0.72	0	0	{'x': 0.72, 'y': 0.1, 'what': 0.07, '': 0.05, 'X': 0.02}	2735	2.82889e-08	0.71875	0.972746	original		0.01	FALSE	FALSE	FALSE	out-of-context	{}
Mathematics	math_division5	15 is to 3 as 85 is to	17	x	0.72	0	0	{'x': 0.72, 'y': 0.11, 'what': 0.06, '': 0.05, 'X': 0.02}	3777	1.75787e-08	0.71875	0.962362	original		0.01	FALSE	FALSE	FALSE	out-of-context	{}
Mathematics	math_division5	50 is to 10 as 100 is to	20	x	0.72	0	0	{'x': 0.72, 'y': 0.08, 'what': 0.06, '': 0.04, 'X': 0.03}	2590	5.82077e-08	0.71875	0.974191	original		0.01	FALSE	FALSE	FALSE	out-of-context	{}
Mathematics	math_division5	40 is to 8 as 65 is to	13	x	0.72	0	0	{'x': 0.72, 'y': 0.14, 'what': 0.05, '': 0.04, 'X': 0.02}	2076	5.00586e-08	0.71875	0.979313	original		0.01	FALSE	FALSE	FALSE	out-of-context	{}
Mathematics	math_division10	80 is to 8 as 30 is to	3	x	0.72	0	0	{'x': 0.72, 'y': 0.15, 'what': 0.04, '': 0.03, 'X': 0.02}	1366	1.4063e-07	0.722656	0.986388	original		0.01	FALSE	FALSE	FALSE	out-of-context	{}
Mathematics	math_division10	100 is to 10 as 20 is to	2	x	0.72	0	0	{'x': 0.72, 'y': 0.08, 'what': 0.08, 'X': 0.04, '': 0.02}	1367	1.21072e-07	0.722656	0.986378	original		0.01	FALSE	FALSE	FALSE	out-of-context	{}
Mathematics	math_division2	70 is to 35 as 2 is to	1	x	0.72	0	0	{'x': 0.72, '': 0.19, 'X': 0.03, 'what': 0.02, 'y': 0.01}	540	6.59376e-07	0.718749	0.994619	original		0.01	FALSE	FALSE	FALSE	out-of-context	{}
Mathematics	math_division2	70 is to 35 as 50 is to	25	x	0.72	0	0	{'x': 0.72, 'y': 0.12, '': 0.04, 'what': 0.03, 'X': 0.03}	937	1.32248e-07	0.722656	0.990663	original		0.01	FALSE	FALSE	FALSE	out-of-context	{}
Mathematics	math_double	40 is to 80 as 5 is to	10	x	0.71	0	0	{'x': 0.71, '': 0.15, 'what': 0.06, 'y': 0.03, 'X': 0.02}	163	2.93553e-06	0.707028	0.998376	original		0.01	FALSE	FALSE	FALSE	out-of-context	{}
Mathematics	math_double	40 is to 80 as 15 is to	30	x	0.71	0	0	{'x': 0.71, '': 0.13, 'y': 0.05, 'X': 0.04, 'what': 0.03}	469	2.90573e-07	0.710937	0.995326	original		0.01	FALSE	FALSE	FALSE	out-of-context	{}
Mathematics	math_double	35 is to 70 as 20 is to	40	x	0.71	0	0	{'x': 0.71, 'y': 0.08, '': 0.07, 'what': 0.05, 'X': 0.04}	373	5.06639e-07	0.710937	0.996283	original		0.01	FALSE	FALSE	FALSE	out-of-context	{}
Mathematics	math_double	35 is to 70 as 2 is to	4	x	0.71	0	0	{'x': 0.71, '': 0.22, 'what': 0.02, 'X': 0.01, 'y': 0.01}	403	5.81145e-07	0.710937	0.995984	original		0.01	FALSE	FALSE	FALSE	out-of-context	{}
Mathematics	math_double	10 is to 20 as 20 is to	40		0.71	0	0	{'': 0.71, 'x': 0.13, 'what': 0.05, 'X': 0.04, 'y': 0.02}	162	9.17912e-06	0.707022	0.998386	original		0.01	FALSE	FALSE	FALSE	out-of-context	{}
Mathematics	math_double	85 is to 170 as 15 is to	30	x	0.71	0	0	{'x': 0.71, 'y': 0.08, '': 0.07, 'what': 0.07, 'X': 0.03}	1459	8.9407e-08	0.714844	0.985461	original		0.01	FALSE	FALSE	FALSE	out-of-context	{}
Mathematics	math_double	90 is to 180 as 15 is to	30	x	0.71	0	0	{'x': 0.71, '': 0.09, 'what': 0.05, 'y': 0.05, 'X': 0.05}	978	1.3411e-07	0.707031	0.990254	original		0.01	FALSE	FALSE	FALSE	out-of-context	{}
Mathematics	math_root	100 is to 10 as 4 is to	2	x	0.71	0	0	{'x': 0.71, 'what': 0.08, '': 0.06, 'y': 0.05, 'X': 0.03}	1104	2.83122e-07	0.710937	0.988999	original		0.01	FALSE	FALSE	FALSE	out-of-context	{}
Mathematics	math_double	100 is to 200 as 35 is to	70	x	0.71	0	0	{'x': 0.71, 'what': 0.08, 'X': 0.07, '': 0.05, 'y': 0.04}	1415	4.30737e-08	0.707031	0.9859	original		0.01	FALSE	FALSE	FALSE	out-of-context	{}
Mathematics	math_double	60 is to 120 as 2 is to	4	x	0.71	0	0	{'x': 0.71, '': 0.16, 'what': 0.05, 'y': 0.03, 'X': 0.02}	293	6.59376e-07	0.707031	0.99708	original		0.01	FALSE	FALSE	FALSE	out-of-context	{}
Mathematics	math_double	75 is to 150 as 10 is to	20	x	0.71	0	0	{'x': 0.71, '': 0.09, 'what': 0.05, 'X': 0.05, 'y': 0.04}	2306	4.23752e-08	0.707031	0.977021	original		0.01	FALSE	FALSE	FALSE	out-of-context	{}
Mathematics	math_double	75 is to 150 as 40 is to	80	x	0.71	0	0	{'x': 0.71, 'what': 0.07, 'y': 0.06, 'X': 0.05, '': 0.05}	2159	3.35276e-08	0.714844	0.978486	original		0.01	FALSE	FALSE	FALSE	out-of-context	{}
Mathematics	math_double	75 is to 150 as 30 is to	60	x	0.71	0	0	{'x': 0.71, 'y': 0.08, 'what': 0.06, 'X': 0.05, '': 0.05}	2046	4.23752e-08	0.714844	0.979612	original		0.01	FALSE	FALSE	FALSE	out-of-context	{}
Mathematics	math_double	70 is to 140 as 10 is to	20	x	0.71	0	0	{'x': 0.71, '': 0.15, 'what': 0.04, 'X': 0.03, 'y': 0.03}	488	3.66941e-07	0.714843	0.995137	original		0.01	FALSE	FALSE	FALSE	out-of-context	{}
Mathematics	math_double	70 is to 140 as 20 is to	40	x	0.71	0	0	{'x': 0.71, '': 0.1, 'what': 0.05, 'X': 0.05, 'y': 0.04}	449	4.02331e-07	0.714843	0.995526	original		0.01	FALSE	FALSE	FALSE	out-of-context	{}
Mathematics	math_division2	36 is to 18 as 8 is to	4	x	0.71	0	0	{'x': 0.71, 'what': 0.09, 'y': 0.08, '': 0.08, '\\(': 0.01}	926	1.63913e-07	0.707031	0.990772	original		0.01	FALSE	FALSE	FALSE	out-of-context	{}
Mathematics	math_division2	34 is to 17 as 8 is to	4	x	0.71	0	0	{'x': 0.71, '': 0.08, 'y': 0.08, 'what': 0.05, 'X': 0.03}	1288	1.73226e-07	0.707031	0.987165	original		0.01	FALSE	FALSE	FALSE	out-of-context	{}
Mathematics	math_division2	34 is to 17 as 4 is to	2	x	0.71	0	0	{'x': 0.71, '': 0.11, 'what': 0.04, 'X': 0.04, 'y': 0.03}	1244	2.45869e-07	0.710937	0.987604	original		0.01	FALSE	FALSE	FALSE	out-of-context	{}
Mathematics	math_division2	26 is to 13 as 8 is to	4	x	0.71	0	0	{'x': 0.71, 'y': 0.1, 'what': 0.07, '': 0.04, 'X': 0.02}	587	3.72529e-07	0.714843	0.994151	original		0.01	FALSE	FALSE	FALSE	out-of-context	{}
Mathematics	math_division2	24 is to 12 as 70 is to	35	x	0.71	0	0	{'x': 0.71, 'y': 0.1, 'what': 0.08, '': 0.05, 'X': 0.02}	3732	1.90921e-08	0.707031	0.962811	original		0.01	FALSE	FALSE	FALSE	out-of-context	{}
Mathematics	math_division2	30 is to 15 as 48 is to	24	x	0.71	0	0	{'x': 0.71, 'y': 0.12, 'what': 0.06, '': 0.04, 'X': 0.03}	1227	6.10016e-08	0.714844	0.987773	original		0.01	FALSE	FALSE	FALSE	out-of-context	{}
Mathematics	math_division2	52 is to 26 as 26 is to	13		0.71	0	0	{'': 0.71, 'x': 0.11, 'what': 0.05, 'X': 0.03, '?': 0.02}	239	7.48038e-06	0.714836	0.997618	original		0.01	FALSE	FALSE	FALSE	out-of-context	{}
Mathematics	math_division2	50 is to 25 as 96 is to	48	x	0.71	0	0	{'x': 0.71, 'y': 0.1, 'what': 0.05, '': 0.05, 'X': 0.03}	3306	2.09548e-08	0.710937	0.967056	original		0.01	FALSE	FALSE	FALSE	out-of-context	{}
Mathematics	math_division2	50 is to 25 as 70 is to	35	x	0.71	0	0	{'x': 0.71, 'y': 0.1, 'what': 0.06, '': 0.05, 'X': 0.04}	1862	4.28408e-08	0.710937	0.981445	original		0.01	FALSE	FALSE	FALSE	out-of-context	{}
Mathematics	math_division2	56 is to 28 as 8 is to	4	x	0.71	0	0	{'x': 0.71, 'what': 0.09, '': 0.08, 'y': 0.07, '\\(': 0.01}	486	5.36442e-07	0.707031	0.995157	original		0.01	FALSE	FALSE	FALSE	out-of-context	{}
Mathematics	math_division2	42 is to 21 as 6 is to	3	x	0.71	0	0	{'x': 0.71, 'what': 0.09, 'y': 0.09, '': 0.05, '\\(': 0.02}	840	2.07685e-07	0.710937	0.991629	original		0.01	FALSE	FALSE	FALSE	out-of-context	{}
Mathematics	math_squares	30 is to 900 as 22 is to	484	x	0.71	0	0	{'x': 0.71, 'what': 0.12, 'y': 0.08, '': 0.04, 'X': 0.03}	8543	3.08501e-09	0.707031	0.91487	original		0.01	FALSE	FALSE	FALSE	out-of-context	{}
Mathematics	math_division2	4 is to 2 as 2 is to	1		0.71	0	0	{'': 0.71, 'x': 0.13, 'what': 0.04, 'X': 0.03, 'the': 0.01}	132	3.67165e-05	0.714807	0.998685	original		0.01	FALSE	FALSE	FALSE	out-of-context	{}
Mathematics	math_squares	20 is to 400 as 26 is to	676	x	0.71	0	0	{'x': 0.71, 'y': 0.08, 'what': 0.08, 'X': 0.04, '': 0.04}	27610	3.51065e-10	0.714844	0.724868	original		0.01	FALSE	FALSE	FALSE	out-of-context	{}
Mathematics	math_squares	20 is to 400 as 10 is to	100	x	0.71	0	0	{'x': 0.71, 'what': 0.07, '': 0.06, 'X': 0.05, 'y': 0.05}	569	3.5204e-07	0.710937	0.99433	original		0.01	FALSE	FALSE	FALSE	out-of-context	{}
Mathematics	math_division2	14 is to 7 as 48 is to	24	x	0.71	0	0	{'x': 0.71, 'y': 0.14, 'what': 0.05, 'X': 0.02, '': 0.02}	2512	4.23752e-08	0.707031	0.974968	original		0.01	FALSE	FALSE	FALSE	out-of-context	{}
Mathematics	math_division2	20 is to 10 as 96 is to	48	x	0.71	0	0	{'x': 0.71, 'y': 0.1, 'what': 0.07, '': 0.05, 'X': 0.02}	3752	2.16532e-08	0.714844	0.962612	original		0.01	FALSE	FALSE	FALSE	out-of-context	{}
Mathematics	math_division2	20 is to 10 as 50 is to	25	x	0.71	0	0	{'x': 0.71, 'y': 0.12, 'what': 0.06, '': 0.04, 'X': 0.02}	790	1.56462e-07	0.710937	0.992128	original		0.01	FALSE	FALSE	FALSE	out-of-context	{}
Mathematics	math_division2	8 is to 4 as 54 is to	27	x	0.71	0	0	{'x': 0.71, 'y': 0.11, 'what': 0.06, '': 0.05, 'X': 0.03}	3638	2.49129e-08	0.714844	0.963748	original		0.01	FALSE	FALSE	FALSE	out-of-context	{}
Mathematics	math_division2	6 is to 3 as 60 is to	30	x	0.71	0	0	{'x': 0.71, 'y': 0.12, 'what': 0.05, '': 0.03, 'X': 0.03}	4968	1.94414e-08	0.714844	0.950494	original		0.01	FALSE	FALSE	FALSE	out-of-context	{}
Mathematics	math_division2	12 is to 6 as 50 is to	25	x	0.71	0	0	{'x': 0.71, 'y': 0.14, '': 0.05, 'what': 0.05, 'X': 0.02}	1273	7.63685e-08	0.707031	0.987315	original		0.01	FALSE	FALSE	FALSE	out-of-context	{}
Mathematics	math_division5	20 is to 4 as 5 is to	1	x	0.71	0	0	{'x': 0.71, 'what': 0.09, 'y': 0.08, '': 0.05, 'X': 0.02}	510	6.03497e-07	0.707031	0.994918	original		0.01	FALSE	FALSE	FALSE	out-of-context	{}
Mathematics	math_division5	50 is to 10 as 85 is to	17	x	0.71	0	0	{'x': 0.71, 'y': 0.09, 'what': 0.07, '': 0.06, 'X': 0.02}	3133	2.50293e-08	0.707031	0.96878	original		0.01	FALSE	FALSE	FALSE	out-of-context	{}
Mathematics	math_division5	35 is to 7 as 45 is to	9	x	0.71	0	0	{'x': 0.71, 'y': 0.12, 'what': 0.06, '': 0.03, '\\(': 0.03}	1302	1.10362e-07	0.707031	0.987026	original		0.01	FALSE	FALSE	FALSE	out-of-context	{}
Mathematics	math_division5	40 is to 8 as 5 is to	1	x	0.71	0	0	{'x': 0.71, 'y': 0.09, 'what': 0.07, '': 0.06, 'the': 0.01}	686	4.88013e-07	0.707031	0.993164	original		0.01	FALSE	FALSE	FALSE	out-of-context	{}
Mathematics	math_division2	100 is to 50 as 82 is to	41	x	0.71	0	0	{'x': 0.71, 'what': 0.08, 'y': 0.08, '': 0.04, 'X': 0.03}	14027	1.6953e-09	0.714844	0.860222	original		0.01	FALSE	FALSE	FALSE	out-of-context	{}
Mathematics	math_division2	100 is to 50 as 54 is to	27	x	0.71	0	0	{'x': 0.71, 'what': 0.07, 'y': 0.07, '': 0.06, 'X': 0.04}	4853	1.3446e-08	0.710937	0.95164	original		0.01	FALSE	FALSE	FALSE	out-of-context	{}
Mathematics	math_division10	90 is to 9 as 20 is to	2	x	0.71	0	0	{'x': 0.71, 'y': 0.09, 'what': 0.06, '': 0.05, 'X': 0.02}	1511	2.09548e-07	0.707031	0.984943	original		0.01	FALSE	FALSE	FALSE	out-of-context	{}
Mathematics	math_division5	70 is to 14 as 85 is to	17	x	0.71	0	0	{'x': 0.71, 'y': 0.1, 'what': 0.06, '': 0.06, '\\(': 0.02}	1845	5.19212e-08	0.707031	0.981615	original		0.01	FALSE	FALSE	FALSE	out-of-context	{}
Mathematics	math_division5	60 is to 12 as 65 is to	13	x	0.71	0	0	{'x': 0.71, 'y': 0.11, 'what': 0.05, '': 0.04, 'X': 0.03}	2005	5.54137e-08	0.714844	0.98002	original		0.01	FALSE	FALSE	FALSE	out-of-context	{}
Mathematics	math_division5	65 is to 13 as 20 is to	4	x	0.71	0	0	{'x': 0.71, 'y': 0.11, '\\(': 0.05, '': 0.04, 'what': 0.04}	876	1.82539e-07	0.707031	0.991271	original		0.01	FALSE	FALSE	FALSE	out-of-context	{}
Mathematics	math_division5	70 is to 14 as 5 is to	1	x	0.71	0	0	{'x': 0.71, '': 0.13, 'what': 0.05, 'y': 0.03, 'the': 0.02}	950	3.5204e-07	0.710937	0.990533	original		0.01	FALSE	FALSE	FALSE	out-of-context	{}
Mathematics	math_division5	85 is to 17 as 100 is to	20	x	0.71	0	0	{'x': 0.71, 'what': 0.06, 'X': 0.06, '': 0.05, 'y': 0.05}	2248	8.98726e-08	0.714844	0.977599	original		0.01	FALSE	FALSE	FALSE	out-of-context	{}
Mathematics	math_division2	88 is to 44 as 6 is to	3	x	0.71	0	0	{'x': 0.71, '': 0.11, 'what': 0.06, 'y': 0.04, 'X': 0.02}	392	1.11014e-06	0.714843	0.996094	original		0.01	FALSE	FALSE	FALSE	out-of-context	{}
Mathematics	math_double	30 is to 60 as 20 is to	40	x	0.7	0	0	{'x': 0.7, 'y': 0.11, '': 0.08, 'X': 0.05, 'what': 0.04}	393	4.00469e-07	0.695312	0.996084	original		0.01	FALSE	FALSE	FALSE	out-of-context	{}
Mathematics	math_double	100 is to 200 as 60 is to	120	x	0.7	0	0	{'x': 0.7, 'X': 0.08, 'what': 0.07, 'y': 0.06, '': 0.04}	1034	7.63685e-08	0.695312	0.989696	original		0.01	FALSE	FALSE	FALSE	out-of-context	{}
Mathematics	math_double	65 is to 130 as 25 is to	50	x	0.7	0	0	{'x': 0.7, 'y': 0.08, 'what': 0.07, '': 0.06, 'X': 0.04}	956	1.1595e-07	0.699219	0.990474	original		0.01	FALSE	FALSE	FALSE	out-of-context	{}
Mathematics	math_double	75 is to 150 as 56 is to	112	x	0.7	0	0	{'x': 0.7, 'what': 0.1, 'y': 0.07, '': 0.05, 'X': 0.03}	12985	1.55705e-09	0.695312	0.870605	original		0.01	FALSE	FALSE	FALSE	out-of-context	{}
Mathematics	math_division2	34 is to 17 as 50 is to	25	x	0.7	0	0	{'x': 0.7, 'y': 0.14, '': 0.05, 'what': 0.04, 'X': 0.03}	719	1.94646e-07	0.695312	0.992835	original		0.01	FALSE	FALSE	FALSE	out-of-context	{}
Mathematics	math_division2	34 is to 17 as 70 is to	35	x	0.7	0	0	{'x': 0.7, 'y': 0.13, 'what': 0.04, '': 0.04, '\\(': 0.03}	4775	1.62981e-08	0.703125	0.952417	original		0.01	FALSE	FALSE	FALSE	out-of-context	{}
Mathematics	math_division2	36 is to 18 as 2 is to	1	x	0.7	0	0	{'x': 0.7, '': 0.16, 'what': 0.06, 'y': 0.03, 'X': 0.02}	396	8.64267e-07	0.703124	0.996054	original		0.01	FALSE	FALSE	FALSE	out-of-context	{}
Mathematics	math_division2	36 is to 18 as 60 is to	30	x	0.7	0	0	{'x': 0.7, 'y': 0.15, 'what': 0.06, '': 0.03, 'X': 0.02}	2771	2.06055e-08	0.695312	0.972387	original		0.01	FALSE	FALSE	FALSE	out-of-context	{}
Mathematics	math_division2	26 is to 13 as 60 is to	30	x	0.7	0	0	{'x': 0.7, 'y': 0.13, 'what': 0.05, 'X': 0.04, '\\(': 0.02}	4533	1.53668e-08	0.695312	0.954829	original		0.01	FALSE	FALSE	FALSE	out-of-context	{}
Mathematics	math_division2	24 is to 12 as 54 is to	27	x	0.7	0	0	{'x': 0.7, 'y': 0.1, 'what': 0.1, '': 0.04, 'X': 0.02}	3620	1.78115e-08	0.699219	0.963927	original		0.01	FALSE	FALSE	FALSE	out-of-context	{}
Mathematics	math_division2	24 is to 12 as 50 is to	25	x	0.7	0	0	{'x': 0.7, 'y': 0.1, 'what': 0.08, '': 0.05, 'X': 0.03}	1560	6.33299e-08	0.699219	0.984455	original		0.01	FALSE	FALSE	FALSE	out-of-context	{}
Mathematics	math_division2	30 is to 15 as 58 is to	29	x	0.7	0	0	{'x': 0.7, '': 0.08, 'y': 0.08, 'what': 0.07, 'X': 0.03}	3682	1.29221e-08	0.699219	0.963309	original		0.01	FALSE	FALSE	FALSE	out-of-context	{}
Mathematics	math_division2	26 is to 13 as 100 is to	50	x	0.7	0	0	{'x': 0.7, 'y': 0.12, 'what': 0.05, 'X': 0.05, '\\(': 0.02}	4536	1.22818e-08	0.699219	0.954799	original		0.01	FALSE	FALSE	FALSE	out-of-context	{}
Mathematics	math_division2	48 is to 24 as 96 is to	48	x	0.7	0	0	{'x': 0.7, 'y': 0.12, 'what': 0.07, '': 0.04, 'X': 0.03}	2143	5.09899e-08	0.695312	0.978645	original		0.01	FALSE	FALSE	FALSE	out-of-context	{}
Mathematics	math_division2	50 is to 25 as 4 is to	2	x	0.7	0	0	{'x': 0.7, '': 0.1, 'what': 0.07, 'y': 0.04, 'X': 0.03}	1510	1.27591e-07	0.695312	0.984953	original		0.01	FALSE	FALSE	FALSE	out-of-context	{}
Mathematics	math_division2	50 is to 25 as 82 is to	41	x	0.7	0	0	{'x': 0.7, 'y': 0.09, 'what': 0.07, '': 0.06, 'X': 0.03}	11546	2.37196e-09	0.699219	0.884945	original		0.01	FALSE	FALSE	FALSE	out-of-context	{}
Mathematics	math_division2	40 is to 20 as 66 is to	33	x	0.7	0	0	{'x': 0.7, 'y': 0.11, 'what': 0.06, '': 0.05, 'X': 0.03}	5357	1.00117e-08	0.703125	0.946618	original		0.01	FALSE	FALSE	FALSE	out-of-context	{}
Mathematics	math_division2	40 is to 20 as 70 is to	35	x	0.7	0	0	{'x': 0.7, 'y': 0.12, '': 0.06, 'what': 0.05, 'X': 0.03}	1602	4.98258e-08	0.703125	0.984036	original		0.01	FALSE	FALSE	FALSE	out-of-context	{}
Mathematics	math_division2	8 is to 4 as 50 is to	25	x	0.7	0	0	{'x': 0.7, 'y': 0.11, 'what': 0.05, '': 0.04, 'X': 0.04}	1448	9.54606e-08	0.703125	0.985571	original		0.01	FALSE	FALSE	FALSE	out-of-context	{}
Mathematics	math_division2	8 is to 4 as 40 is to	20	x	0.7	0	0	{'x': 0.7, 'y': 0.13, 'what': 0.05, 'X': 0.04, '': 0.03}	2414	4.44707e-08	0.703125	0.975945	original		0.01	FALSE	FALSE	FALSE	out-of-context	{}
Mathematics	math_division2	12 is to 6 as 60 is to	30	x	0.7	0	0	{'x': 0.7, 'y': 0.13, 'what': 0.06, '': 0.04, 'X': 0.02}	3807	2.09548e-08	0.695312	0.962064	original		0.01	FALSE	FALSE	FALSE	out-of-context	{}
Mathematics	math_division2	10 is to 5 as 96 is to	48	x	0.7	0	0	{'x': 0.7, 'y': 0.13, 'what': 0.05, '': 0.04, 'X': 0.02}	5841	1.5134e-08	0.695312	0.941795	original		0.01	FALSE	FALSE	FALSE	out-of-context	{}
Mathematics	math_division2	100 is to 50 as 92 is to	46	x	0.7	0	0	{'x': 0.7, 'what': 0.09, 'y': 0.09, 'X': 0.03, '': 0.03}	9800	3.8126e-09	0.695312	0.902344	original		0.01	FALSE	FALSE	FALSE	out-of-context	{}
Mathematics	math_division5	10 is to 2 as 95 is to	19	x	0.7	0	0	{'x': 0.7, 'y': 0.13, 'what': 0.06, '': 0.04, 'X': 0.03}	5526	1.27475e-08	0.695312	0.944934	original		0.01	FALSE	FALSE	FALSE	out-of-context	{}
Mathematics	math_division5	10 is to 2 as 65 is to	13	x	0.7	0	0	{'x': 0.7, 'y': 0.12, '': 0.05, 'what': 0.04, 'X': 0.04}	2316	5.51809e-08	0.703125	0.976921	original		0.01	FALSE	FALSE	FALSE	out-of-context	{}
Mathematics	math_division5	35 is to 7 as 85 is to	17	x	0.7	0	0	{'x': 0.7, 'y': 0.13, 'what': 0.06, '': 0.03, '\\(': 0.02}	2737	3.67872e-08	0.703125	0.972726	original		0.01	FALSE	FALSE	FALSE	out-of-context	{}
Mathematics	math_division5	85 is to 17 as 5 is to	1	x	0.7	0	0	{'x': 0.7, '': 0.14, 'what': 0.06, 'y': 0.03, 'X': 0.02}	777	4.88013e-07	0.695312	0.992257	original		0.01	FALSE	FALSE	FALSE	out-of-context	{}
Mathematics	math_division5	90 is to 18 as 50 is to	10	x	0.7	0	0	{'x': 0.7, 'y': 0.1, '': 0.08, 'what': 0.04, 'X': 0.03}	1046	1.11759e-07	0.695312	0.989577	original		0.01	FALSE	FALSE	FALSE	out-of-context	{}
Mathematics	math_division2	72 is to 36 as 4 is to	2	x	0.7	0	0	{'x': 0.7, '': 0.13, 'what': 0.07, 'y': 0.03, 'X': 0.02}	818	3.50177e-07	0.695312	0.991849	original		0.01	FALSE	FALSE	FALSE	out-of-context	{}
Mathematics	math_division2	70 is to 35 as 96 is to	48	x	0.7	0	0	{'x': 0.7, 'y': 0.16, '': 0.04, 'what': 0.04, '\\(': 0.02}	3282	2.24682e-08	0.695312	0.967295	original		0.01	FALSE	FALSE	FALSE	out-of-context	{}
Mathematics	math_division2	80 is to 40 as 96 is to	48	x	0.7	0	0	{'x': 0.7, 'y': 0.14, '': 0.05, 'what': 0.04, 'X': 0.03}	3114	2.02563e-08	0.699219	0.968969	original		0.01	FALSE	FALSE	FALSE	out-of-context	{}
Mathematics	math_double	30 is to 60 as 12 is to	24	x	0.69	0	0	{'x': 0.69, 'y': 0.11, '': 0.1, 'what': 0.04, 'X': 0.03}	1484	6.10016e-08	0.6875	0.985212	original		0.01	FALSE	FALSE	FALSE	out-of-context	{}
Mathematics	math_double	90 is to 180 as 5 is to	10	x	0.69	0	0	{'x': 0.69, '': 0.14, 'what': 0.08, 'y': 0.04, 'X': 0.01}	448	5.55068e-07	0.687499	0.995536	original		0.01	FALSE	FALSE	FALSE	out-of-context	{}
Mathematics	math_division2	34 is to 17 as 60 is to	30	x	0.69	0	0	{'x': 0.69, 'y': 0.14, '': 0.04, 'what': 0.04, '\\(': 0.03}	3182	2.64263e-08	0.691406	0.968292	original		0.01	FALSE	FALSE	FALSE	out-of-context	{}
Mathematics	math_division2	34 is to 17 as 6 is to	3	x	0.69	0	0	{'x': 0.69, '': 0.1, 'y': 0.06, 'what': 0.06, 'X': 0.03}	1304	1.94646e-07	0.6875	0.987006	original		0.01	FALSE	FALSE	FALSE	out-of-context	{}
Mathematics	math_division2	26 is to 13 as 6 is to	3	x	0.69	0	0	{'x': 0.69, 'y': 0.1, 'what': 0.07, '': 0.05, 'X': 0.03}	748	3.59491e-07	0.691406	0.992546	original		0.01	FALSE	FALSE	FALSE	out-of-context	{}
Mathematics	math_division2	26 is to 13 as 70 is to	35	x	0.69	0	0	{'x': 0.69, 'y': 0.15, 'what': 0.04, 'X': 0.04, '\\(': 0.02}	6184	9.77889e-09	0.6875	0.938377	original		0.01	FALSE	FALSE	FALSE	out-of-context	{}
Mathematics	math_division2	30 is to 15 as 92 is to	46	x	0.69	0	0	{'x': 0.69, 'y': 0.09, '': 0.07, 'what': 0.07, 'X': 0.03}	6314	6.43195e-09	0.691406	0.937081	original		0.01	FALSE	FALSE	FALSE	out-of-context	{}
Mathematics	math_division2	28 is to 14 as 98 is to	49	x	0.69	0	0	{'x': 0.69, 'what': 0.09, '': 0.06, 'y': 0.06, 'X': 0.04}	3847	2.84053e-08	0.6875	0.961665	original		0.01	FALSE	FALSE	FALSE	out-of-context	{}
Mathematics	math_division2	28 is to 14 as 50 is to	25	x	0.69	0	0	{'x': 0.69, 'y': 0.11, 'what': 0.06, 'X': 0.04, '': 0.04}	1781	6.56582e-08	0.691406	0.982252	original		0.01	FALSE	FALSE	FALSE	out-of-context	{}
Mathematics	math_division2	28 is to 14 as 60 is to	30	x	0.69	0	0	{'x': 0.69, 'y': 0.11, 'what': 0.07, 'X': 0.03, '': 0.03}	4480	1.97906e-08	0.691406	0.955357	original		0.01	FALSE	FALSE	FALSE	out-of-context	{}
Mathematics	math_division2	28 is to 14 as 56 is to	28	x	0.69	0	0	{'x': 0.69, 'y': 0.11, 'what': 0.07, '': 0.04, 'X': 0.04}	3174	3.56231e-08	0.691406	0.968371	original		0.01	FALSE	FALSE	FALSE	out-of-context	{}
Mathematics	math_division2	50 is to 25 as 40 is to	20	x	0.69	0	0	{'x': 0.69, 'y': 0.1, 'what': 0.06, 'X': 0.04, '': 0.04}	2463	4.21423e-08	0.691406	0.975456	original		0.01	FALSE	FALSE	FALSE	out-of-context	{}
Mathematics	math_division2	14 is to 7 as 82 is to	41	x	0.69	0	0	{'x': 0.69, 'y': 0.12, 'what': 0.06, '': 0.04, 'X': 0.03}	11862	4.07454e-09	0.691406	0.881796	original		0.01	FALSE	FALSE	FALSE	out-of-context	{}
Mathematics	math_division2	6 is to 3 as 100 is to	50	x	0.69	0	0	{'x': 0.69, 'y': 0.12, 'what': 0.06, 'X': 0.04, '': 0.04}	3881	2.84053e-08	0.6875	0.961326	original		0.01	FALSE	FALSE	FALSE	out-of-context	{}
Mathematics	math_division2	6 is to 3 as 70 is to	35	x	0.69	0	0	{'x': 0.69, 'y': 0.12, '': 0.05, 'what': 0.05, 'X': 0.03}	6624	1.83936e-08	0.6875	0.933992	original		0.01	FALSE	FALSE	FALSE	out-of-context	{}
Mathematics	math_division5	40 is to 8 as 15 is to	3	x	0.69	0	0	{'x': 0.69, 'y': 0.13, '': 0.06, 'what': 0.05, 'X': 0.02}	1184	1.6205e-07	0.6875	0.988202	original		0.01	FALSE	FALSE	FALSE	out-of-context	{}
Mathematics	math_division2	100 is to 50 as 58 is to	29	x	0.69	0	0	{'x': 0.69, 'y': 0.08, 'what': 0.08, '': 0.06, 'X': 0.04}	5714	9.31323e-09	0.6875	0.94306	original		0.01	FALSE	FALSE	FALSE	out-of-context	{}
Mathematics	math_division5	90 is to 18 as 100 is to	20	x	0.69	0	0	{'x': 0.69, 'what': 0.06, '': 0.06, 'y': 0.06, 'X': 0.05}	2415	7.54371e-08	0.691406	0.975935	original		0.01	FALSE	FALSE	FALSE	out-of-context	{}
Mathematics	math_division2	74 is to 37 as 8 is to	4	x	0.69	0	0	{'x': 0.69, '': 0.1, 'what': 0.08, 'y': 0.06, 'X': 0.02}	605	4.13507e-07	0.691406	0.993971	original		0.01	FALSE	FALSE	FALSE	out-of-context	{}
Mathematics	math_division2	60 is to 30 as 6 is to	3	x	0.69	0	0	{'x': 0.69, '': 0.09, 'what': 0.08, 'y': 0.08, 'X': 0.02}	1007	1.37836e-07	0.6875	0.989965	original		0.01	FALSE	FALSE	FALSE	out-of-context	{}
Mathematics	math_division2	60 is to 30 as 4 is to	2	x	0.69	0	0	{'x': 0.69, '': 0.1, 'what': 0.09, 'y': 0.05, 'X': 0.03}	592	3.22238e-07	0.691406	0.994101	original		0.01	FALSE	FALSE	FALSE	out-of-context	{}
Mathematics	math_division2	76 is to 38 as 8 is to	4	x	0.69	0	0	{'x': 0.69, 'y': 0.09, 'what': 0.09, '': 0.07, 'X': 0.01}	745	3.07336e-07	0.691406	0.992576	original		0.01	FALSE	FALSE	FALSE	out-of-context	{}
Mathematics	math_division2	84 is to 42 as 8 is to	4	x	0.69	0	0	{'x': 0.69, '': 0.08, 'what': 0.08, 'y': 0.07, 'X': 0.02}	1345	2.34693e-07	0.6875	0.986597	original		0.01	FALSE	FALSE	FALSE	out-of-context	{}
Mathematics	math_division2	80 is to 40 as 66 is to	33	x	0.69	0	0	{'x': 0.69, 'y': 0.11, '': 0.07, 'what': 0.06, 'X': 0.03}	6971	6.95582e-09	0.6875	0.930535	original		0.01	FALSE	FALSE	FALSE	out-of-context	{}
Mathematics	math_double	36 is to 72 as 15 is to	30	x	0.68	0	0	{'x': 0.68, '': 0.12, 'what': 0.09, 'y': 0.04, 'X': 0.03}	1444	6.98492e-08	0.679687	0.985611	original		0.01	FALSE	FALSE	FALSE	out-of-context	{}
Mathematics	math_double	6 is to 12 as 50 is to	100	x	0.68	0	0	{'x': 0.68, 'y': 0.12, '': 0.06, 'what': 0.05, 'X': 0.05}	1048	1.4063e-07	0.675781	0.989557	original		0.01	FALSE	FALSE	FALSE	out-of-context	{}
Mathematics	math_double	30 is to 60 as 14 is to	28	x	0.68	0	0	{'x': 0.68, '': 0.15, 'y': 0.07, 'what': 0.05, 'X': 0.03}	1841	4.02797e-08	0.679687	0.981655	original		0.01	FALSE	FALSE	FALSE	out-of-context	{}
Mathematics	math_root	16 is to 4 as 4 is to	2		0.68	0	0	{'': 0.68, 'x': 0.15, 'X': 0.03, 'the': 0.03, 'what': 0.02}	848	1.05053e-06	0.67578	0.99155	original		0.01	FALSE	FALSE	FALSE	out-of-context	{}
Mathematics	math_double	60 is to 120 as 24 is to	48	x	0.68	0	0	{'x': 0.68, 'y': 0.1, 'what': 0.07, '': 0.06, 'X': 0.04}	3238	1.92085e-08	0.679687	0.967734	original		0.01	FALSE	FALSE	FALSE	out-of-context	{}
Mathematics	math_double	75 is to 150 as 15 is to	30	x	0.68	0	0	{'x': 0.68, '': 0.1, 'X': 0.06, 'what': 0.05, 'y': 0.05}	2739	4.09782e-08	0.679687	0.972706	original		0.01	FALSE	FALSE	FALSE	out-of-context	{}
Mathematics	math_double	75 is to 150 as 52 is to	104	x	0.68	0	0	{'x': 0.68, 'what': 0.1, '': 0.07, 'y': 0.06, 'X': 0.04}	7059	4.91855e-09	0.683594	0.929658	original		0.01	FALSE	FALSE	FALSE	out-of-context	{}
Mathematics	math_double	75 is to 150 as 85 is to	170	x	0.68	0	0	{'x': 0.68, 'what': 0.11, '': 0.06, 'y': 0.06, 'X': 0.04}	1541	4.42378e-08	0.679687	0.984644	original		0.01	FALSE	FALSE	FALSE	out-of-context	{}
Mathematics	math_division2	36 is to 18 as 54 is to	27	x	0.68	0	0	{'x': 0.68, 'y': 0.14, 'what': 0.08, '': 0.05, 'X': 0.02}	2124	2.38651e-08	0.679687	0.978835	original		0.01	FALSE	FALSE	FALSE	out-of-context	{}
Mathematics	math_division2	36 is to 18 as 50 is to	25	x	0.68	0	0	{'x': 0.68, 'y': 0.14, '': 0.06, 'what': 0.06, 'X': 0.03}	959	8.70787e-08	0.679687	0.990444	original		0.01	FALSE	FALSE	FALSE	out-of-context	{}
Mathematics	math_division2	22 is to 11 as 96 is to	48	x	0.68	0	0	{'x': 0.68, 'y': 0.14, 'what': 0.07, '': 0.03, 'X': 0.02}	4356	2.79397e-08	0.675781	0.956593	original		0.01	FALSE	FALSE	FALSE	out-of-context	{}
Mathematics	math_division2	22 is to 11 as 80 is to	40	x	0.68	0	0	{'x': 0.68, 'y': 0.13, 'what': 0.06, '': 0.03, '\\(': 0.02}	3104	4.4005e-08	0.675781	0.969069	original		0.01	FALSE	FALSE	FALSE	out-of-context	{}
Mathematics	math_division2	24 is to 12 as 48 is to	24	x	0.68	0	0	{'x': 0.68, 'y': 0.12, 'what': 0.09, '': 0.04, 'X': 0.02}	1007	1.15484e-07	0.683594	0.989965	original		0.01	FALSE	FALSE	FALSE	out-of-context	{}
Mathematics	math_division2	50 is to 25 as 60 is to	30	x	0.68	0	0	{'x': 0.68, 'y': 0.12, 'what': 0.06, '': 0.04, 'X': 0.04}	2074	5.30854e-08	0.675781	0.979333	original		0.01	FALSE	FALSE	FALSE	out-of-context	{}
[truncated: 4,911 more rows]

## Sheet: num_stats
	count	mean	std	min	25%	50%	75%	max
next_token_softmax	6816	0.557814	0.101574	0.3	0.48	0.55	0.63	0.84
next_token_precision@1	6816	0	0	0	0	0	0	0
[truncated: 6 more rows]

## Sheet: precision_stats
	FALSE	TRUE
[truncated: 3 more rows]

[truncated: 7 more sheets: area_stats, domain_stats, unbunding_type_stats, extracted_factors_stats, generated_token_stats, next_token_precision@5_stats, best_item_type_stats]
