# Supplementary material
Source: ML conference proceedings conference paper supplement (https://openreview.net/forum?id=MSm0VFL9pq)

### NEXT TOKEN PRECISION@1

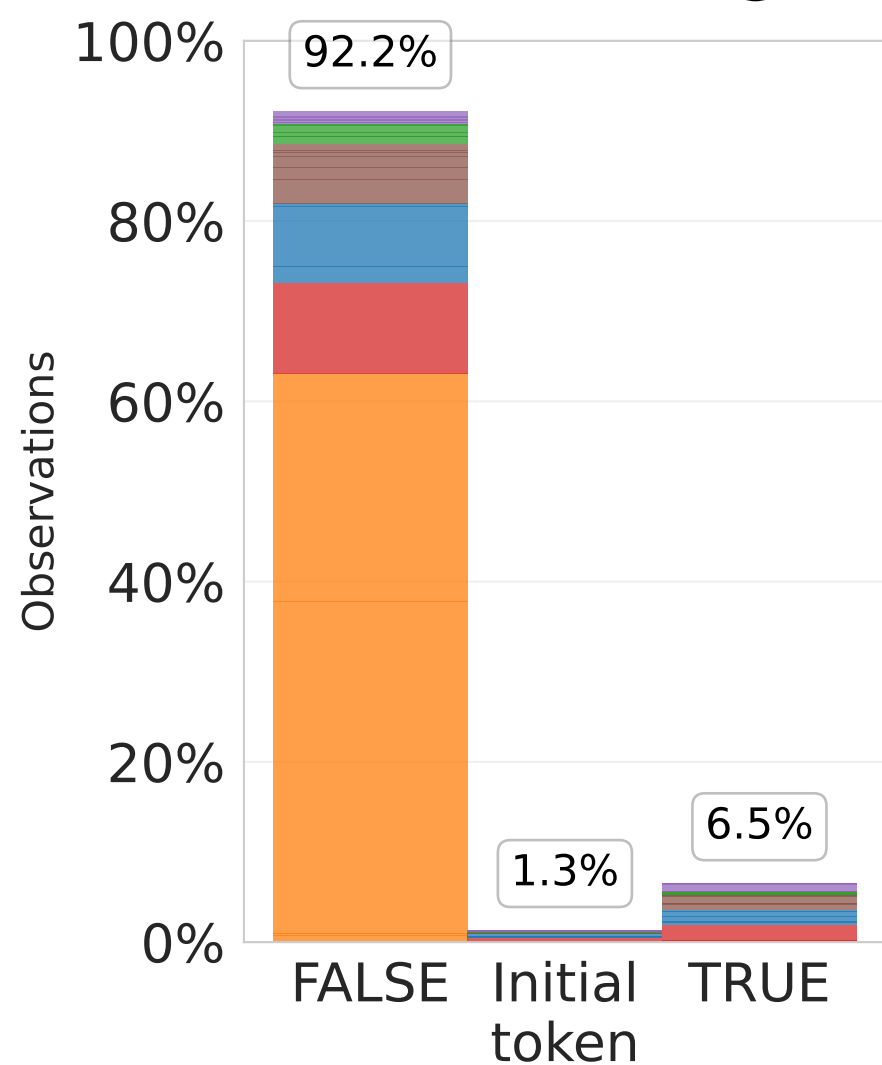

### NEXT TOKEN PRECISION@5

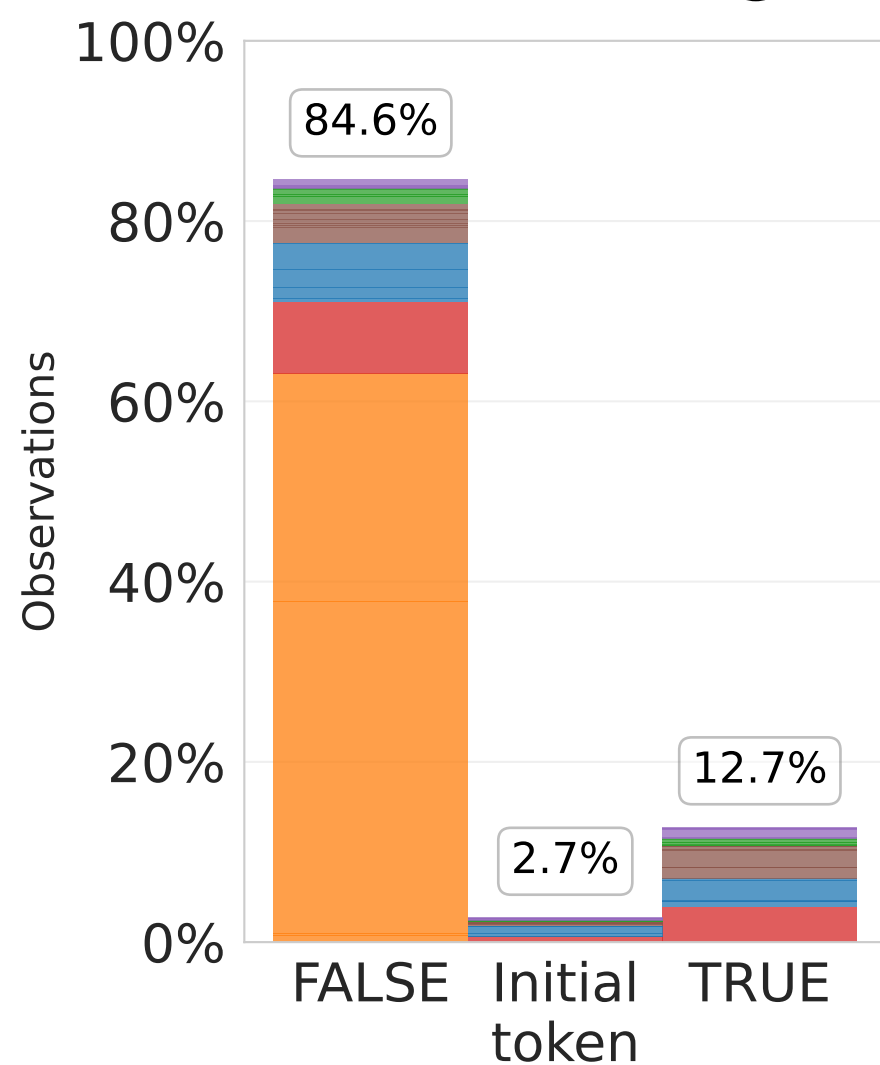

### NEXT TOKEN SOFTMAX

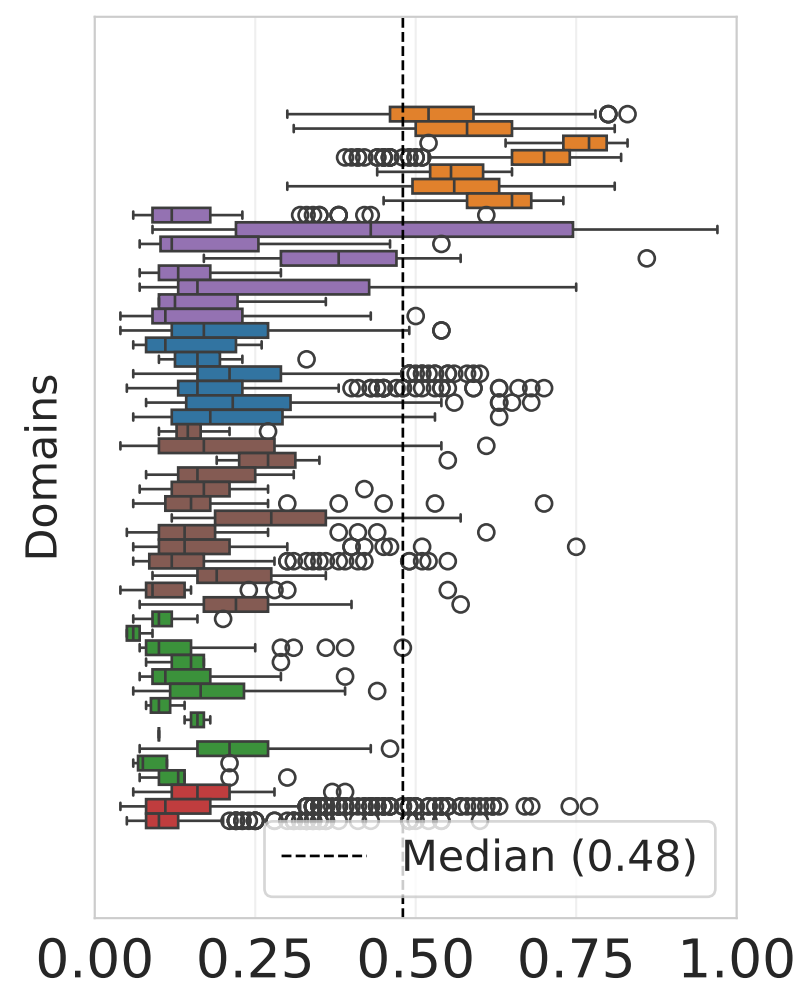

### TARGET TOKEN RANK

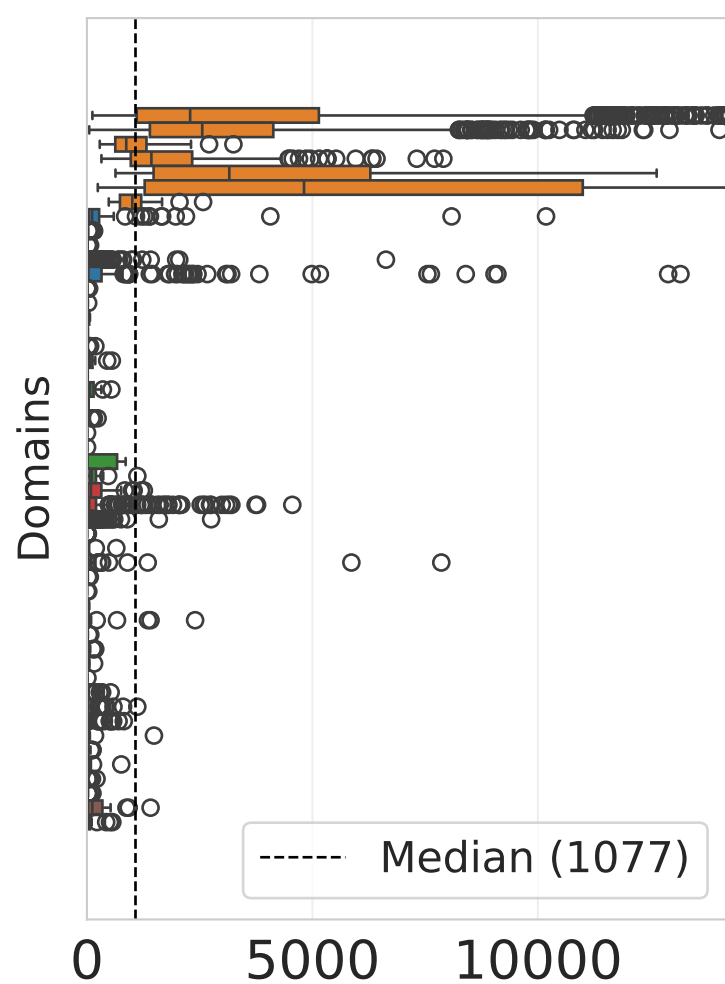

### TARGET TOKEN SOFTMAX DIFF

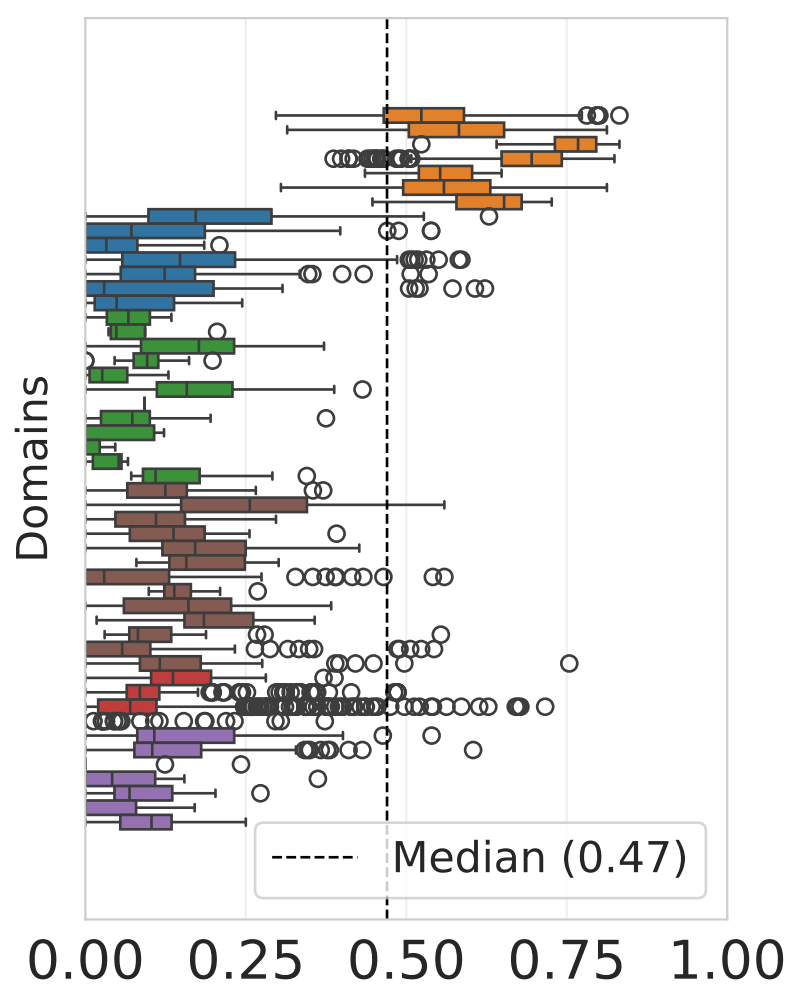

### PRECISION@1

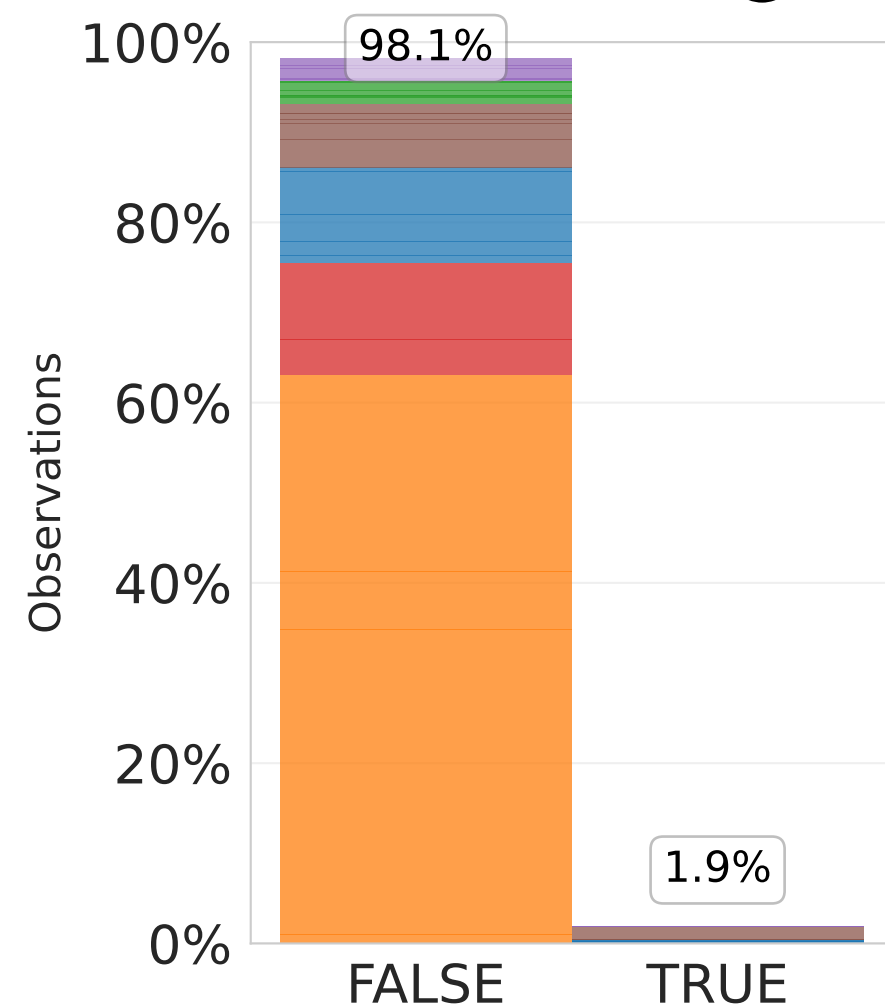

### PRECISION@5

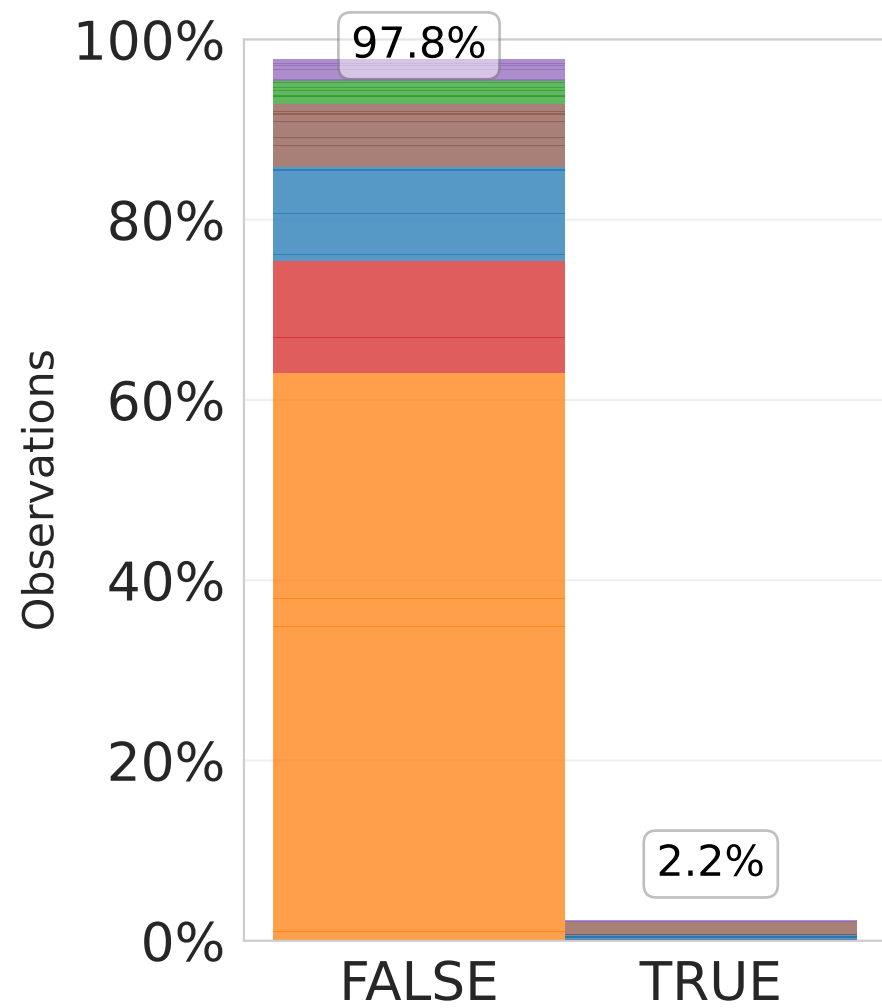

### TARGET VSA COSINE SIM

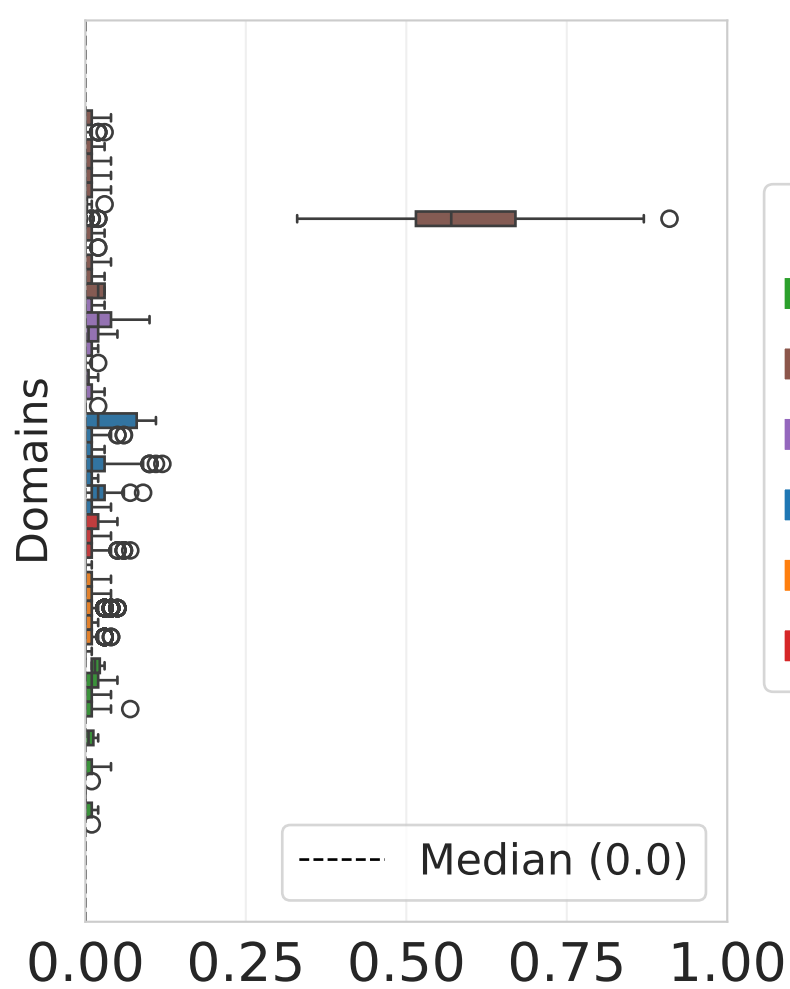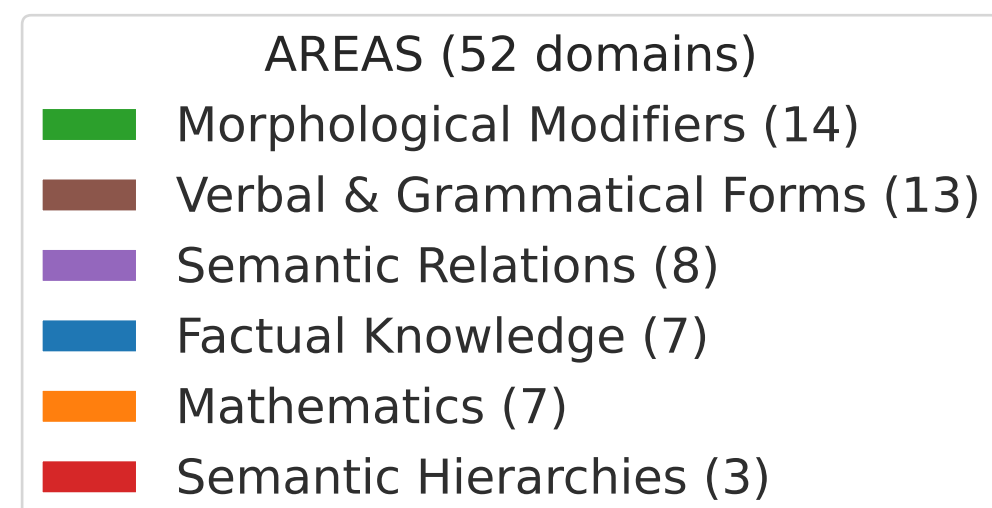

Supplement: supplementary_material [file original.pdf › code/outputs/OLMo-2/stats/graphs/original.pdf]
