# Supplementary material
Source: ML conference proceedings conference paper supplement (https://openreview.net/forum?id=MSm0VFL9pq)
Supplement: supplementary_material [file original.xlsx]

## Sheet: items
area	domain	doc	target	generated_token	next_token_softmax	next_token_precision@1	next_token_precision@5	top5_tokens	target_token_rank	target_token_softmax	target_token_softmax_diff	normalized_target_token_rank	unbunding_type	extracted_factors	target_vsa_cosine_sim	precision@1	precision@3	precision@5	best_item_type	vsa_sim
Verbal & Grammatical Forms	noun_plural_irreg	duty is to duties as species is to	species	genus	0.36	0	1	{'genus': 0.36, 'species': 0.22, 'genera': 0.12, 'individuals': 0.06, 'the': 0.02}	1	0.21875	0.140625	0.99999	original	target	0.91	TRUE	TRUE	TRUE	target	{'species': 0.91}
Verbal & Grammatical Forms	noun_plural_irreg	authorities is to authority as species is to	species	genus	0.25	0	1	{'genus': 0.25, 'species': 0.22, 'individual': 0.08, 'animal': 0.04, 'individuals': 0.04}	1	0.222656	0.0292969	0.99999	original	target	0.87	TRUE	TRUE	TRUE	target	{'species': 0.87}
Verbal & Grammatical Forms	noun_plural_irreg	history is to histories as species is to	species	species	0.37	1	1	{'species': 0.37, 'populations': 0.08, 'organisms': 0.07, 'animals': 0.06, 'life': 0.03}	0	0.365234	0	1	original	target	0.83	TRUE	TRUE	TRUE	target	{'species': 0.83}
Verbal & Grammatical Forms	noun_plural_irreg	entries is to entry as species is to	species	species	0.33	1	1	{'species': 0.33, 'genus': 0.14, 'spec': 0.04, '______': 0.03, '': 0.02}	0	0.332031	0	1	original	target	0.83	TRUE	TRUE	TRUE	target	{'species': 0.83}
Verbal & Grammatical Forms	noun_plural_irreg	authority is to authorities as species is to	species	individuals	0.28	0	1	{'individuals': 0.28, 'species': 0.28, 'animals': 0.05, 'the': 0.03, 'individual': 0.03}	1	0.283203	0	0.99999	original	target	0.83	TRUE	TRUE	TRUE	target	{'species': 0.83}
Verbal & Grammatical Forms	noun_plural_irreg	formulae is to formula as species is to	species	genus	0.61	0	1	{'genus': 0.61, 'species': 0.05, 'formula': 0.03, 'organism': 0.02, 'individual': 0.02}	1	0.0500488	0.559326	0.99999	original	target	0.82	TRUE	TRUE	TRUE	target	{'species': 0.82}
Verbal & Grammatical Forms	noun_plural_irreg	entry is to entries as species is to	species	species	0.5	1	1	{'species': 0.5, 'spec': 0.06, '______': 0.02, 'genus': 0.02, '__': 0.02}	0	0.503906	0	1	original	target	0.82	TRUE	TRUE	TRUE	target	{'species': 0.82}
Verbal & Grammatical Forms	noun_plural_irreg	history is to histories as series is to	series	sets	0.3	0	1	{'sets': 0.3, 'numbers': 0.25, 'sequences': 0.13, 'series': 0.11, 'number': 0.01}	3	0.106934	0.191895	0.99997	original	target	0.81	TRUE	TRUE	TRUE	target	{'series': 0.81}
Verbal & Grammatical Forms	noun_plural_irreg	industry is to industries as species is to	species	ecosystems	0.21	0	1	{'ecosystems': 0.21, 'species': 0.08, 'ecology': 0.07, 'bi': 0.04, 'the': 0.03}	1	0.0751953	0.129883	0.99999	original	target	0.81	TRUE	TRUE	TRUE	target	{'species': 0.81}
Verbal & Grammatical Forms	noun_plural_irreg	economy is to economies as species is to	species	species	0.17	1	1	{'species': 0.17, 'ecosystems': 0.12, 'bi': 0.1, 'spec': 0.06, '': 0.05}	0	0.172852	0	1	original	target	0.81	TRUE	TRUE	TRUE	target	{'species': 0.81}
Verbal & Grammatical Forms	noun_plural_irreg	energies is to energy as species is to	species	life	0.18	0	1	{'life': 0.18, 'biology': 0.07, 'evolution': 0.06, 'species': 0.04, 'biodiversity': 0.03}	3	0.0422363	0.135498	0.99997	original	target	0.8	TRUE	TRUE	TRUE	target	{'species': 0.8}
Verbal & Grammatical Forms	noun_plural_irreg	facility is to facilities as series is to	series	series	0.09	1	1	{'series': 0.09, 'serial': 0.07, '______': 0.04, 'books': 0.04, 'what': 0.03}	0	0.09375	0	1	original	target	0.8	TRUE	TRUE	TRUE	target	{'series': 0.8}
Verbal & Grammatical Forms	noun_plural_irreg	facility is to facilities as species is to	species	species	0.41	1	1	{'species': 0.41, 'spec': 0.09, '______': 0.04, '__': 0.04, 'genus': 0.03}	0	0.408203	0	1	original	target	0.79	TRUE	TRUE	TRUE	target	{'species': 0.79}
Verbal & Grammatical Forms	noun_plural_irreg	energy is to energies as species is to	species	species	0.22	1	1	{'species': 0.22, 'organisms': 0.12, 'animals': 0.07, 'life': 0.05, 'spec': 0.04}	0	0.223633	0	1	original	target	0.78	TRUE	TRUE	TRUE	target	{'species': 0.78}
Verbal & Grammatical Forms	noun_plural_irreg	entry is to entries as series is to	series	series	0.17	1	1	{'series': 0.17, '______': 0.03, 'what': 0.03, '': 0.03, 'serial': 0.02}	0	0.172852	0	1	original	target	0.78	TRUE	TRUE	TRUE	target	{'series': 0.78}
Verbal & Grammatical Forms	noun_plural_irreg	agency is to agencies as species is to	species	species	0.46	1	1	{'species': 0.46, 'organisms': 0.08, 'animals': 0.04, 'populations': 0.04, 'spec': 0.04}	0	0.460938	0	1	original	target	0.77	TRUE	TRUE	TRUE	target	{'species': 0.77}
Verbal & Grammatical Forms	noun_plural_irreg	security is to securities as species is to	species	species	0.37	1	1	{'species': 0.37, 'spec': 0.16, 'animals': 0.06, 'a': 0.02, 'the': 0.02}	0	0.369141	0	1	original	target	0.77	TRUE	TRUE	TRUE	target	{'species': 0.77}
Verbal & Grammatical Forms	noun_plural_irreg	duty is to duties as series is to	series	terms	0.23	0	1	{'terms': 0.23, 'numbers': 0.12, 'sums': 0.05, 'series': 0.04, 'number': 0.03}	3	0.0424805	0.187012	0.99997	original	target	0.77	TRUE	TRUE	TRUE	target	{'series': 0.77}
Verbal & Grammatical Forms	noun_plural_irreg	army is to armies as species is to	species	populations	0.13	0	1	{'populations': 0.13, 'species': 0.08, '______': 0.06, 'what': 0.06, 'ecosystems': 0.04}	1	0.0771484	0.0576172	0.99999	original	target	0.77	TRUE	TRUE	TRUE	target	{'species': 0.77}
Verbal & Grammatical Forms	noun_plural_irreg	histories is to history as species is to	species	genus	0.2	0	0	{'genus': 0.2, 'life': 0.09, 'evolution': 0.06, 'the': 0.05, 'nature': 0.04}	14	0.0167236	0.179565	0.99986	original	target	0.77	TRUE	TRUE	TRUE	target	{'species': 0.77}
Verbal & Grammatical Forms	noun_plural_irreg	safety is to safeties as species is to	species	species	0.28	1	1	{'species': 0.28, 'spec': 0.22, '______': 0.06, '__': 0.03, '_____': 0.03}	0	0.283203	0	1	original	target	0.76	TRUE	TRUE	TRUE	target	{'species': 0.76}
Verbal & Grammatical Forms	noun_plural_irreg	economies is to economy as species is to	species	ecology	0.16	0	1	{'ecology': 0.16, 'species': 0.13, 'biology': 0.1, 'spec': 0.08, 'ecosystem': 0.06}	1	0.130859	0.0263672	0.99999	original	target	0.76	TRUE	TRUE	TRUE	target	{'species': 0.76}
Verbal & Grammatical Forms	noun_plural_irreg	securities is to security as species is to	species	species	0.1	1	1	{'species': 0.1, '______': 0.08, 'spec': 0.05, 'genus': 0.04, 'evolution': 0.03}	0	0.0976562	0	1	original	target	0.74	TRUE	TRUE	TRUE	target	{'species': 0.74}
Verbal & Grammatical Forms	noun_plural_irreg	memory is to memories as species is to	species	species	0.17	1	1	{'species': 0.17, 'spec': 0.07, '______': 0.06, '__': 0.05, 'evolution': 0.03}	0	0.170898	0	1	original	target	0.73	TRUE	TRUE	TRUE	target	{'species': 0.73}
Verbal & Grammatical Forms	noun_plural_irreg	category is to categories as series is to	series	numbers	0.42	0	0	{'numbers': 0.42, 'sets': 0.18, 'sequences': 0.11, 'number': 0.02, 'sums': 0.02}	113	0.000246048	0.41577	0.998874	original	target	0.72	TRUE	TRUE	TRUE	target	{'series': 0.72}
Verbal & Grammatical Forms	noun_plural_irreg	memories is to memory as species is to	species	evolution	0.16	0	0	{'evolution': 0.16, 'organisms': 0.08, 'life': 0.07, 'population': 0.06, 'organism': 0.05}	7	0.0354004	0.123779	0.99993	original	target	0.72	TRUE	TRUE	TRUE	target	{'species': 0.72}
Verbal & Grammatical Forms	noun_plural_irreg	formula is to formulae as species is to	species	species	0.42	1	1	{'species': 0.42, 'spec': 0.25, 'formula': 0.05, '...': 0.02, 'taxa': 0.02}	0	0.419922	0	1	original	target	0.71	TRUE	TRUE	TRUE	target	{'species': 0.71}
Verbal & Grammatical Forms	noun_plural_irreg	industry is to industries as series is to	series	______	0.06	0	1	{'______': 0.06, 'novels': 0.04, 'books': 0.03, 'series': 0.03, '': 0.03}	2	0.0317383	0.0241699	0.99998	original	target	0.71	TRUE	TRUE	TRUE	target	{'series': 0.71}
Verbal & Grammatical Forms	noun_plural_irreg	cities is to city as species is to	species	genus	0.17	0	0	{'genus': 0.17, '______': 0.07, '': 0.02, '_____': 0.03}	13	0.0145264	0.152466	0.99987	original	target	0.71	TRUE	TRUE	TRUE	target	{'species': 0.71}
Verbal & Grammatical Forms	noun_plural_irreg	properties is to property as species is to	species	genus	0.19	0	1	{'genus': 0.19, 'species': 0.08, 'animal': 0.05, '______': 0.04, 'organism': 0.03}	1	0.0786133	0.109863	0.99999	original	target	0.7	TRUE	TRUE	TRUE	target	{'species': 0.7}
Verbal & Grammatical Forms	noun_plural_irreg	policies is to policy as species is to	species	species	0.1	1	1	{'species': 0.1, 'biology': 0.08, 'population': 0.07, 'taxonomy': 0.04, 'evolution': 0.04}	0	0.102539	0	1	original	target	0.7	TRUE	TRUE	TRUE	target	{'species': 0.7}
Verbal & Grammatical Forms	noun_plural_irreg	facilities is to facility as species is to	species	species	0.1	1	1	{'species': 0.1, '______': 0.07, '': 0.05, 'genus': 0.04, 'habitat': 0.04}	0	0.101562	0	1	original	target	0.7	TRUE	TRUE	TRUE	target	{'species': 0.7}
Verbal & Grammatical Forms	noun_plural_irreg	entries is to entry as series is to	series		0.07	0	1	{'': 0.04, 'sequence': 0.05, 'series': 0.05, '______': 0.04}	1	0.0454102	0.0205078	0.99999	original	target	0.7	TRUE	TRUE	TRUE	target	{'series': 0.7}
Verbal & Grammatical Forms	noun_plural_irreg	categories is to category as series is to	series	sequence	0.28	0	0	{'sequence': 0.28, 'number': 0.23, 'set': 0.11, 'category': 0.04, 'sum': 0.03}	39	0.00164032	0.27375	0.999611	original	target	0.7	TRUE	TRUE	TRUE	target	{'series': 0.7}
Verbal & Grammatical Forms	noun_plural_irreg	community is to communities as series is to	series	series	0.32	1	1	{'series': 0.32, 'sets': 0.05, '______': 0.04, '': 0.03, 'sequences': 0.03}	0	0.324219	0	1	original	target	0.69	TRUE	TRUE	TRUE	target	{'series': 0.69}
Verbal & Grammatical Forms	noun_plural_irreg	ability is to abilities as species is to	species	species	0.13	1	1	{'species': 0.13, 'individuals': 0.1, 'properties': 0.04, 'specific': 0.02, 'the': 0.02}	0	0.132812	0	1	original	target	0.69	TRUE	TRUE	TRUE	target	{'species': 0.69}
Verbal & Grammatical Forms	noun_plural_irreg	safeties is to safety as species is to	species	species	0.3	1	1	{'species': 0.3, 'spec': 0.25, '______': 0.07, '_____': 0.03, '__': 0.02}	0	0.296875	0	1	original	target	0.68	TRUE	TRUE	TRUE	target	{'species': 0.68}
Verbal & Grammatical Forms	noun_plural_irreg	county is to counties as series is to	series	______	0.07	0	1	{'______': 0.07, '"': 0.05, 'series': 0.04, '__': 0.04, 'what': 0.04}	2	0.0429688	0.027832	0.99998	original	target	0.68	TRUE	TRUE	TRUE	target	{'series': 0.68}
Verbal & Grammatical Forms	noun_plural_irreg	bases is to basis as series is to	series	sequence	0.17	0	0	{'sequence': 0.17, '______': 0.09, 'sum': 0.08, '____': 0.04, '__': 0.03}	9	0.0195312	0.155273	0.99991	original	target	0.68	TRUE	TRUE	TRUE	target	{'series': 0.68}
Verbal & Grammatical Forms	noun_plural_irreg	safety is to safeties as series is to	series	series	0.48	1	1	{'series': 0.48, '______': 0.03, 'serial': 0.03, '...': 0.02, 'ser': 0.02}	0	0.484375	0	1	original	target	0.67	TRUE	TRUE	TRUE	target	{'series': 0.67}
Verbal & Grammatical Forms	noun_plural_irreg	city is to cities as species is to	species	species	0.17	1	1	{'species': 0.17, 'ecosystems': 0.11, 'organisms': 0.06, 'animals': 0.06, 'populations': 0.03}	0	0.169922	0	1	original	target	0.67	TRUE	TRUE	TRUE	target	{'species': 0.67}
Verbal & Grammatical Forms	noun_plural_irreg	country is to countries as series is to	series	______	0.06	0	0	{'______': 0.06, '': 0.03, '"': 0.05}	12	0.0192871	0.0437012	0.99988	original	target	0.67	TRUE	TRUE	TRUE	target	{'series': 0.67}
Verbal & Grammatical Forms	noun_plural_irreg	majority is to majorities as species is to	species	species	0.5	1	1	{'species': 0.5, 'individuals': 0.17, 'genus': 0.03, 'spec': 0.03, 'individual': 0.02}	0	0.498047	0	1	original	target	0.66	TRUE	TRUE	TRUE	target	{'species': 0.66}
Verbal & Grammatical Forms	noun_plural_irreg	army is to armies as series is to	series	series	0.11	1	1	{'series': 0.11, 'sets': 0.08, '______': 0.06, '__': 0.04, 'what': 0.04}	0	0.105469	0	1	original	target	0.66	TRUE	TRUE	TRUE	target	{'series': 0.66}
Verbal & Grammatical Forms	noun_plural_irreg	energies is to energy as series is to	series	number	0.08	0	0	{'number': 0.08, 'numbers': 0.05, 'money': 0.04, 'sum': 0.04, 'arithmetic': 0.03}	36	0.0038147	0.0728455	0.999641	original	target	0.66	TRUE	TRUE	TRUE	target	{'series': 0.66}
Verbal & Grammatical Forms	noun_plural_irreg	libraries is to library as species is to	species	genus	0.16	0	1	{'genus': 0.16, 'species': 0.08, '______': 0.05, 'population': 0.05, '__': 0.03}	1	0.0771484	0.0869141	0.99999	original	target	0.65	TRUE	TRUE	TRUE	target	{'species': 0.65}
Verbal & Grammatical Forms	noun_plural_irreg	authority is to authorities as series is to	series	series	0.32	1	1	{'series': 0.32, 'numbers': 0.09, 'serial': 0.05, 'terms': 0.03, 'ser': 0.02}	0	0.320312	0	1	original	target	0.64	TRUE	TRUE	TRUE	target	{'series': 0.64}
Verbal & Grammatical Forms	noun_plural_irreg	academy is to academies as species is to	species	species	0.29	1	1	{'species': 0.29, '______': 0.1, '__': 0.04, '_____': 0.04, 'spec': 0.04}	0	0.292969	0	1	original	target	0.64	TRUE	TRUE	TRUE	target	{'species': 0.64}
Verbal & Grammatical Forms	noun_plural_irreg	industries is to industry as species is to	species	ecology	0.12	0	1	{'ecology': 0.12, 'ecosystem': 0.11, 'genus': 0.05, 'species': 0.04, '______': 0.04}	3	0.0437012	0.0754395	0.99997	original	target	0.63	TRUE	TRUE	TRUE	target	{'species': 0.63}
Verbal & Grammatical Forms	noun_plural_irreg	formula is to formulae as series is to	series	series	0.29	1	1	{'series': 0.29, 'formula': 0.18, '...': 0.04, '______': 0.03}	0	0.292969	0	1	original	target	0.62	TRUE	TRUE	TRUE	target	{'series': 0.62}
Verbal & Grammatical Forms	noun_plural_irreg	countries is to country as species is to	species	genus	0.16	0	1	{'genus': 0.16, '______': 0.08, '': 0.04, 'species': 0.03, '?': 0.03}	3	0.0324707	0.122803	0.99997	original	target	0.62	TRUE	TRUE	TRUE	target	{'species': 0.62}
Verbal & Grammatical Forms	noun_plural_irreg	county is to counties as species is to	species	genus	0.15	0	1	{'genus': 0.15, '______': 0.1, 'species': 0.09, 'genera': 0.05, '__': 0.04}	2	0.0888672	0.0576172	0.99998	original	target	0.62	TRUE	TRUE	TRUE	target	{'species': 0.62}
Verbal & Grammatical Forms	noun_plural_irreg	abilities is to ability as species is to	species	genus	0.13	0	1	{'genus': 0.13, 'species': 0.09, '______': 0.06, 'animal': 0.02, 'population': 0.02}	1	0.0908203	0.0410156	0.99999	original	target	0.62	TRUE	TRUE	TRUE	target	{'species': 0.62}
Verbal & Grammatical Forms	noun_plural_irreg	histories is to history as series is to	series	set	0.17	0	0	{'set': 0.17, 'sets': 0.15, 'number': 0.14, 'numbers': 0.12, 'the': 0.02}	90	0.000782013	0.174023	0.999103	original	target	0.62	TRUE	TRUE	TRUE	target	{'series': 0.62}
Verbal & Grammatical Forms	noun_plural_irreg	communities is to community as series is to	series	______	0.06	0	0	{'______': 0.06, '': 0.05, 'parallel': 0.04, '__': 0.04, '____': 0.03}	9	0.0124512	0.0505371	0.99991	original	target	0.62	TRUE	TRUE	TRUE	target	{'series': 0.62}
Verbal & Grammatical Forms	noun_plural_irreg	authorities is to authority as series is to	series	series	0.17	1	1	{'series': 0.17, 'serial': 0.07, 'parallel': 0.05, 'sequence': 0.04, 'power': 0.02}	0	0.170898	0	1	original	target	0.61	TRUE	TRUE	TRUE	target	{'series': 0.61}
Verbal & Grammatical Forms	noun_plural_irreg	country is to countries as species is to	species	______	0.11	0	1	{'______': 0.11, 'species': 0.06, 'genus': 0.05, '__': 0.04, '': 0.03}	1	0.0568848	0.0495605	0.99999	original	target	0.61	TRUE	TRUE	TRUE	target	{'species': 0.61}
Verbal & Grammatical Forms	noun_plural_irreg	counties is to county as species is to	species	genus	0.48	0	1	{'genus': 0.48, '______': 0.03, '': 0.03, 'kingdom': 0.02, 'species': 0.02}	4	0.0200195	0.464355	0.99996	original	target	0.6	TRUE	TRUE	TRUE	target	{'species': 0.6}
Verbal & Grammatical Forms	noun_plural_irreg	business is to businesses as species is to	species	species	0.44	1	1	{'species': 0.44, 'organisms': 0.06, 'animals': 0.06, 'ecosystems': 0.05, 'the': 0.04}	0	0.439453	0	1	original	target	0.6	TRUE	TRUE	TRUE	target	{'species': 0.6}
Verbal & Grammatical Forms	noun_plural_irreg	duties is to duty as species is to	species	species	0.24	1	1	{'species': 0.24, 'genus': 0.13, 'individual': 0.09, 'essence': 0.03, 'the': 0.03}	0	0.242188	0	1	original	target	0.6	TRUE	TRUE	TRUE	target	{'species': 0.6}
Verbal & Grammatical Forms	noun_plural_irreg	academy is to academies as series is to	series	series	0.13	1	1	{'series': 0.13, 'serial': 0.12, '______': 0.1, '__': 0.04, '____': 0.04}	0	0.131836	0	1	original	target	0.6	TRUE	TRUE	TRUE	target	{'series': 0.6}
Verbal & Grammatical Forms	noun_plural_irreg	activities is to activity as species is to	species	species	0.1	1	1	{'species': 0.1, 'evolution': 0.07, 'population': 0.06, '______': 0.04, 'spec': 0.04}	0	0.0966797	0	1	original	target	0.6	TRUE	TRUE	TRUE	target	{'species': 0.6}
Verbal & Grammatical Forms	noun_plural_irreg	memories is to memory as series is to	series	number	0.54	0	0	{'number': 0.54, 'numbers': 0.12, 'set': 0.03, 'sum': 0.02, '': 0.02}	28	0.00162506	0.541344	0.999721	original	target	0.6	TRUE	TRUE	TRUE	target	{'series': 0.6}
Verbal & Grammatical Forms	noun_plural_irreg	categories is to category as species is to	species	genus	0.22	0	0	{'genus': 0.22, 'animal': 0.11, 'life': 0.11, 'organism': 0.05, 'living': 0.05}	9	0.0223389	0.196411	0.99991	original	target	0.6	TRUE	TRUE	TRUE	target	{'species': 0.6}
Verbal & Grammatical Forms	noun_plural_irreg	properties is to property as series is to	series	number	0.12	0	0	{'number': 0.12, 'sequence': 0.08, 'serial': 0.04, '______': 0.04, '____': 0.03}	8	0.0189209	0.104126	0.99992	original	target	0.6	TRUE	TRUE	TRUE	target	{'series': 0.6}
Verbal & Grammatical Forms	noun_plural_irreg	facilities is to facility as series is to	series		0.09	0	0	{'': 0.03, '______': 0.06, '?': 0.04}	18	0.0098877	0.0780029	0.999821	original	target	0.6	TRUE	TRUE	TRUE	target	{'series': 0.6}
Verbal & Grammatical Forms	noun_plural_irreg	counties is to county as series is to	series	''	0.04	0	0	{"''": 0.04, '"': 0.04, '____': 0.03, '______': 0.03, '': 0.03}	6	0.0286865	0.0106201	0.99994	original	target	0.6	TRUE	TRUE	TRUE	target	{'series': 0.6}
Verbal & Grammatical Forms	noun_plural_irreg	life is to lives as species is to	species	species	0.25	1	1	{'species': 0.25, 'individuals': 0.15, 'organisms': 0.06, 'animals': 0.06, 'specimens': 0.04}	0	0.24707	0	1	original	target	0.59	TRUE	TRUE	TRUE	target	{'species': 0.59}
Verbal & Grammatical Forms	noun_plural_irreg	memory is to memories as series is to	series	series	0.15	1	1	{'series': 0.15, '______': 0.08, 'numbers': 0.04, 'serial': 0.04, '...': 0.04}	0	0.150391	0	1	original	target	0.59	TRUE	TRUE	TRUE	target	{'series': 0.59}
Verbal & Grammatical Forms	noun_plural_irreg	opportunities is to opportunity as species is to	species	species	0.09	1	1	{'species': 0.09, '______': 0.05, 'opportunity': 0.04, 'population': 0.04, '': 0.04}	0	0.0917969	0	1	original	target	0.59	TRUE	TRUE	TRUE	target	{'species': 0.59}
Verbal & Grammatical Forms	noun_plural_irreg	children is to child as species is to	species	genus	0.15	0	0	{'genus': 0.15, '______': 0.09, '_____': 0.04, 'animal': 0.03, 'organism': 0.03}	7	0.0236816	0.121826	0.99993	original	target	0.59	TRUE	TRUE	TRUE	target	{'species': 0.59}
Verbal & Grammatical Forms	noun_plural_irreg	economy is to economies as series is to	series	series	0.4	1	1	{'series': 0.4, 'numbers': 0.06, 'sets': 0.04, '': 0.04, 'sequences': 0.04}	0	0.404297	0	1	original	target	0.58	TRUE	TRUE	TRUE	target	{'series': 0.58}
Verbal & Grammatical Forms	noun_plural_irreg	duties is to duty as series is to	series	series	0.28	1	1	{'series': 0.28, 'parallel': 0.26, 'circuit': 0.03, 'resistance': 0.02, '': 0.02}	0	0.28125	0	1	original	target	0.58	TRUE	TRUE	TRUE	target	{'series': 0.58}
Verbal & Grammatical Forms	noun_plural_irreg	responsibilities is to responsibility as species is to	species	species	0.17	1	1	{'species': 0.17, 'genus': 0.08, 'individual': 0.05, 'responsibility': 0.04, 'spec': 0.04}	0	0.166992	0	1	original	target	0.58	TRUE	TRUE	TRUE	target	{'species': 0.58}
Verbal & Grammatical Forms	noun_plural_irreg	academies is to academy as species is to	species	genus	0.13	0	1	{'genus': 0.13, 'species': 0.07, '______': 0.07, '_____': 0.04, '': 0.04}	1	0.0732422	0.0546875	0.99999	original	target	0.58	TRUE	TRUE	TRUE	target	{'species': 0.58}
Verbal & Grammatical Forms	noun_plural_irreg	agencies is to agency as species is to	species	______	0.1	0	1	{'______': 0.1, 'genus': 0.1, 'species': 0.08, 'population': 0.07, '__': 0.04}	2	0.0849609	0.0112305	0.99998	original	target	0.58	TRUE	TRUE	TRUE	target	{'species': 0.58}
Verbal & Grammatical Forms	noun_plural_irreg	bases is to basis as species is to	species	genus	0.26	0	0	{'genus': 0.26, '______': 0.09, 'population': 0.05, '': 0.04, '__': 0.03}	5	0.0296631	0.234009	0.99995	original	target	0.58	TRUE	TRUE	TRUE	target	{'species': 0.58}
Verbal & Grammatical Forms	noun_plural_irreg	society is to societies as species is to	species	species	0.34	1	1	{'species': 0.34, 'ecosystems': 0.13, 'the': 0.07, 'populations': 0.05, 'a': 0.03}	0	0.34375	0	1	original	target	0.57	TRUE	TRUE	TRUE	target	{'species': 0.57}
Verbal & Grammatical Forms	noun_plural_irreg	analysis is to analyses as species is to	species	species	0.33	1	1	{'species': 0.33, 'spec': 0.13, 'genus': 0.1, 'genera': 0.03, 'animals': 0.03}	0	0.326172	0	1	original	target	0.57	TRUE	TRUE	TRUE	target	{'species': 0.57}
Verbal & Grammatical Forms	noun_plural_irreg	child is to children as species is to	species	species	0.16	1	1	{'species': 0.16, 'organisms': 0.08, 'individuals': 0.08, 'animals': 0.07, '______': 0.07}	0	0.15918	0	1	original	target	0.57	TRUE	TRUE	TRUE	target	{'species': 0.57}
Verbal & Grammatical Forms	noun_plural_irreg	activity is to activities as species is to	species	species	0.09	1	1	{'species': 0.09, 'organisms': 0.08, 'evolution': 0.05, 'populations': 0.04, 'life': 0.03}	0	0.0878906	0	1	original	target	0.57	TRUE	TRUE	TRUE	target	{'species': 0.57}
Verbal & Grammatical Forms	noun_plural_irreg	category is to categories as species is to	species	animals	0.4	0	0	{'animals': 0.4, 'living': 0.11, 'life': 0.1, 'organisms': 0.1, 'the': 0.03}	10	0.00778198	0.390656	0.9999	original	target	0.57	TRUE	TRUE	TRUE	target	{'species': 0.57}
Verbal & Grammatical Forms	noun_plural_irreg	activities is to activity as series is to	series		0.09	0	0	{'': 0.04, '______': 0.04, 'sequence': 0.03, '__': 0.02}	12	0.0123901	0.0735474	0.99988	original	target	0.57	TRUE	TRUE	TRUE	target	{'series': 0.57}
Verbal & Grammatical Forms	noun_plural_irreg	cities is to city as series is to	series		0.08	0	0	{'': 0.04, '?': 0.04, '______': 0.04, '"': 0.03}	30	0.00793457	0.0721436	0.999701	original	target	0.57	TRUE	TRUE	TRUE	target	{'series': 0.57}
Verbal & Grammatical Forms	noun_plural_irreg	families is to family as series is to	series		0.08	0	0	{'': 0.05, '______': 0.06, 'set': 0.05, '__': 0.05}	36	0.00500488	0.0780029	0.999641	original	target	0.57	TRUE	TRUE	TRUE	target	{'series': 0.57}
Verbal & Grammatical Forms	noun_plural_irreg	industries is to industry as series is to	series	______	0.05	0	0	{'______': 0.05, 'parallel': 0.04, '__': 0.04, 'serial': 0.03, '': 0.03}	15	0.00939941	0.0447998	0.999851	original	target	0.57	TRUE	TRUE	TRUE	target	{'series': 0.57}
Verbal & Grammatical Forms	noun_plural_irreg	majority is to majorities as series is to	series	series	0.48	1	1	{'series': 0.48, 'serial': 0.06, 'numbers': 0.05, 'ser': 0.03, 'terms': 0.03}	0	0.484375	0	1	original	target	0.56	TRUE	TRUE	TRUE	target	{'series': 0.56}
Verbal & Grammatical Forms	noun_plural_irreg	academies is to academy as series is to	series	serial	0.09	0	1	{'serial': 0.09, 'series': 0.06, '': 0.05, '?': 0.05, '______': 0.04}	1	0.0622559	0.0231934	0.99999	original	target	0.56	TRUE	TRUE	TRUE	target	{'series': 0.56}
Verbal & Grammatical Forms	noun_plural_irreg	countries is to country as series is to	series		0.04	0	1	{'': 0.04, '?': 0.04, 'series': 0.04, '______': 0.04, 'episode': 0.03}	2	0.0393066	0.00512695	0.99998	original	target	0.56	TRUE	TRUE	TRUE	target	{'series': 0.56}
Verbal & Grammatical Forms	noun_plural_irreg	secretaries is to secretary as species is to	species	genus	0.16	0	0	{'genus': 0.16, '': 0.04, '?': 0.04, '"': 0.03}	16	0.0128784	0.144348	0.999841	original	target	0.56	TRUE	TRUE	TRUE	target	{'species': 0.56}
Verbal & Grammatical Forms	noun_plural_irreg	formulae is to formula as series is to	series	sequence	0.42	0	1	{'sequence': 0.42, 'sum': 0.11, 'formula': 0.04, 'series': 0.03, 'summ': 0.03}	3	0.0349121	0.388916	0.99997	original	target	0.55	TRUE	TRUE	TRUE	target	{'series': 0.55}
Verbal & Grammatical Forms	noun_plural_irreg	series is to series as species is to	species	genus	0.41	0	1	{'genus': 0.41, '______': 0.09, 'species': 0.06, '': 0.03, '_____': 0.02}	2	0.0598145	0.354248	0.99998	original	target	0.55	TRUE	TRUE	TRUE	target	{'species': 0.55, 'series': 0.42}
Verbal & Grammatical Forms	noun_plural_irreg	analysis is to analyses as series is to	series	series	0.24	1	1	{'series': 0.24, 'sequences': 0.08, '______': 0.06, 'serial': 0.04, '__': 0.03}	0	0.242188	0	1	original	target	0.55	TRUE	TRUE	TRUE	target	{'series': 0.55}
Verbal & Grammatical Forms	noun_plural_irreg	economies is to economy as series is to	series	series	0.2	1	1	{'series': 0.2, 'sequence': 0.08, 'serial': 0.06, 'set': 0.03, '': 0.02}	0	0.197266	0	1	original	target	0.55	TRUE	TRUE	TRUE	target	{'series': 0.55}
Verbal & Grammatical Forms	noun_plural_irreg	policy is to policies as species is to	species	species	0.18	1	1	{'species': 0.18, 'spec': 0.09, 'taxonomy': 0.08, '______': 0.05, 'taxa': 0.04}	0	0.178711	0	1	original	target	0.55	TRUE	TRUE	TRUE	target	{'species': 0.55}
Verbal & Grammatical Forms	noun_plural_irreg	family is to families as series is to	series	what	0.07	0	1	{'what': 0.07, '______': 0.07, 'series': 0.05, '?': 0.03, '__': 0.03}	2	0.0515137	0.0144043	0.99998	original	target	0.55	TRUE	TRUE	TRUE	target	{'series': 0.55}
Verbal & Grammatical Forms	noun_plural_irreg	children is to child as series is to	series	______	0.06	0	0	{'______': 0.06, '': 0.04, '____': 0.04, '"': 0.04, '__': 0.03}	60	0.00300598	0.0536346	0.999402	original	target	0.55	TRUE	TRUE	TRUE	target	{'series': 0.55}
Verbal & Grammatical Forms	noun_plural_irreg	library is to libraries as species is to	species	species	0.18	1	1	{'species': 0.18, '______': 0.06, '__': 0.05, 'ecosystems': 0.03, 'spec': 0.03}	0	0.177734	0	1	original	target	0.54	TRUE	TRUE	TRUE	target	{'species': 0.54}
Verbal & Grammatical Forms	noun_plural_irreg	responsibility is to responsibilities as species is to	species	species	0.13	1	1	{'species': 0.13, 'individuals': 0.07, 'spec': 0.04, 'genus': 0.03, 'responsibilities': 0.03}	0	0.131836	0	1	original	target	0.54	TRUE	TRUE	TRUE	target	{'species': 0.54}
Verbal & Grammatical Forms	noun_plural_irreg	business is to businesses as series is to	series	serial	0.12	0	1	{'serial': 0.12, 'series': 0.12, 'television': 0.05, 'novels': 0.05, 'books': 0.04}	1	0.115723	0.00732422	0.99999	original	target	0.54	TRUE	TRUE	TRUE	target	{'series': 0.54}
Verbal & Grammatical Forms	noun_plural_irreg	policy is to policies as series is to	series	series	0.12	1	1	{'series': 0.12, '______': 0.09, '__': 0.05, '': 0.04, 'serial': 0.03}	0	0.118652	0	1	original	target	0.54	TRUE	TRUE	TRUE	target	{'series': 0.54}
Verbal & Grammatical Forms	noun_plural_irreg	energy is to energies as series is to	series	numbers	0.41	0	1	{'numbers': 0.41, 'terms': 0.05, 'sums': 0.04, 'series': 0.04, 'sequences': 0.03}	3	0.0358887	0.374268	0.99997	original	target	0.53	TRUE	TRUE	TRUE	target	{'series': 0.53}
Verbal & Grammatical Forms	noun_plural_irreg	basis is to bases as series is to	series	sequences	0.39	0	1	{'sequences': 0.39, 'sums': 0.15, 'series': 0.12, 'sets': 0.07, 'summ': 0.04}	2	0.120117	0.274414	0.99998	original	target	0.53	TRUE	TRUE	TRUE	target	{'series': 0.53}
Verbal & Grammatical Forms	noun_plural_irreg	opportunity is to opportunities as species is to	species	species	0.38	1	1	{'species': 0.38, 'spec': 0.21, 'opportunities': 0.04, '__': 0.02, '______': 0.02}	0	0.382812	0	1	original	target	0.53	TRUE	TRUE	TRUE	target	{'species': 0.53}
Verbal & Grammatical Forms	noun_plural_irreg	property is to properties as species is to	species	species	0.32	1	1	{'species': 0.32, 'organisms': 0.1, '': 0.07, 'individuals': 0.04, 'spec': 0.04}	0	0.324219	0	1	original	target	0.53	TRUE	TRUE	TRUE	target	{'species': 0.53}
Verbal & Grammatical Forms	noun_plural_irreg	basis is to bases as species is to	species	genus	0.24	0	1	{'genus': 0.24, 'species': 0.21, 'populations': 0.04, 'genera': 0.04, 'spec': 0.02}	1	0.210938	0.0283203	0.99999	original	target	0.53	TRUE	TRUE	TRUE	target	{'species': 0.53}
Verbal & Grammatical Forms	noun_plural_irreg	life is to lives as series is to	series	series	0.22	1	1	{'series': 0.22, 'terms': 0.2, 'numbers': 0.09, 'items': 0.05, 'sets': 0.03}	0	0.22168	0	1	original	target	0.53	TRUE	TRUE	TRUE	target	{'series': 0.53}
Verbal & Grammatical Forms	noun_plural_irreg	security is to securities as series is to	series	numbers	0.21	0	1	{'numbers': 0.21, 'serial': 0.06, '______': 0.05, 'series': 0.03, 'integers': 0.02}	3	0.0264893	0.182495	0.99997	original	target	0.53	TRUE	TRUE	TRUE	target	{'series': 0.53}
Verbal & Grammatical Forms	noun_plural_irreg	data is to datum as species is to	species	species	0.12	1	1	{'species': 0.12, '______': 0.12, 'spec': 0.1, '_____': 0.06, 'genus': 0.05}	0	0.125	0	1	original	target	0.53	TRUE	TRUE	TRUE	target	{'species': 0.53}
Verbal & Grammatical Forms	noun_plural_irreg	majorities is to majority as species is to	species	species	0.09	1	1	{'species': 0.09, '______': 0.07, 'population': 0.07, 'genus': 0.06, '': 0.04}	0	0.0947266	0	1	original	target	0.53	TRUE	TRUE	TRUE	target	{'species': 0.53}
Verbal & Grammatical Forms	noun_plural_irreg	analyses is to analysis as series is to	series	sequence	0.06	0	0	{'sequence': 0.06, '______': 0.06, '__': 0.04, 'serial': 0.03, '____': 0.02}	11	0.0131836	0.0422363	0.99989	original	target	0.53	TRUE	TRUE	TRUE	target	{'series': 0.53}
Verbal & Grammatical Forms	noun_plural_irreg	agency is to agencies as series is to	series	series	0.28	1	1	{'series': 0.28, 'serial': 0.08, '______': 0.05, '__': 0.04, 'books': 0.03}	0	0.279297	0	1	original	target	0.52	TRUE	TRUE	TRUE	target	{'series': 0.52}
Verbal & Grammatical Forms	noun_plural_irreg	property is to properties as series is to	series	series	0.27	1	1	{'series': 0.27, 'numbers': 0.07, '': 0.05, 'sets': 0.04, 'sequences': 0.03}	0	0.267578	0	1	original	target	0.52	TRUE	TRUE	TRUE	target	{'series': 0.52}
Verbal & Grammatical Forms	noun_plural_irreg	loss is to losses as species is to	species	species	0.16	1	1	{'species': 0.16, '______': 0.09, 'spec': 0.06, '_____': 0.04, '__': 0.04}	0	0.162109	0	1	original	target	0.52	TRUE	TRUE	TRUE	target	{'species': 0.52}
Verbal & Grammatical Forms	noun_plural_irreg	city is to cities as series is to	series	series	0.1	1	1	{'series': 0.1, 'numbers': 0.07, 'books': 0.06, 'what': 0.04, '______': 0.02}	0	0.0952148	0	1	original	target	0.52	TRUE	TRUE	TRUE	target	{'series': 0.52}
Verbal & Grammatical Forms	noun_plural_irreg	policies is to policy as series is to	series	serial	0.07	0	1	{'serial': 0.07, '______': 0.04, '': 0.03, 'series': 0.02, '__': 0.02}	4	0.0241699	0.0461426	0.99996	original	target	0.52	TRUE	TRUE	TRUE	target	{'series': 0.52}
Verbal & Grammatical Forms	noun_plural_irreg	activity is to activities as series is to	series	events	0.04	0	1	{'events': 0.04, 'series': 0.03, '______': 0.03, '__': 0.02, 'terms': 0.02}	1	0.0314941	0.00415039	0.99999	original	target	0.52	TRUE	TRUE	TRUE	target	{'series': 0.52}
Verbal & Grammatical Forms	noun_plural_irreg	child is to children as series is to	series	numbers	0.25	0	0	{'numbers': 0.25, 'terms': 0.09, '______': 0.07, '__': 0.03, 'integers': 0.03}	6	0.0228271	0.223267	0.99994	original	target	0.52	TRUE	TRUE	TRUE	target	{'series': 0.52}
Verbal & Grammatical Forms	noun_plural_irreg	libraries is to library as series is to	series	book	0.06	0	0	{'book': 0.06, '______': 0.06, '': 0.05, '____': 0.04, '__': 0.04}	7	0.0267334	0.0372314	0.99993	original	target	0.52	TRUE	TRUE	TRUE	target	{'series': 0.52}
Verbal & Grammatical Forms	noun_plural_irreg	businesses is to business as species is to	species	species	0.21	1	1	{'species': 0.21, 'ecology': 0.07, 'nature': 0.06, 'ecosystem': 0.06, 'ecosystems': 0.05}	0	0.210938	0	1	original	target	0.51	TRUE	TRUE	TRUE	target	{'species': 0.51}
Verbal & Grammatical Forms	noun_plural_irreg	datum is to data as species is to	species	species	0.14	1	1	{'species': 0.14, 'organisms': 0.06, 'organism': 0.05, 'animals': 0.05, '______': 0.05}	0	0.140625	0	1	original	target	0.51	TRUE	TRUE	TRUE	target	{'species': 0.51}
Verbal & Grammatical Forms	noun_plural_irreg	century is to centuries as series is to	series	series	0.05	1	1	{'series': 0.05, '______': 0.05, 'serial': 0.04, '': 0.03}	0	0.0546875	0	1	original	target	0.51	TRUE	TRUE	TRUE	target	{'series': 0.51}
Verbal & Grammatical Forms	noun_plural_irreg	agencies is to agency as series is to	series		0.1	0	0	{'': 0.05, '______': 0.06, '____': 0.04, 'serial': 0.04}	6	0.0228271	0.0733643	0.99994	original	target	0.51	TRUE	TRUE	TRUE	target	{'series': 0.51}
Verbal & Grammatical Forms	noun_plural_irreg	opportunities is to opportunity as series is to	series		0.06	0	0	{'': 0.04, '______': 0.05, 'parallel': 0.03, '__': 0.03}	10	0.0145874	0.046936	0.9999	original	target	0.51	TRUE	TRUE	TRUE	target	{'series': 0.51}
Verbal & Grammatical Forms	noun_plural_irreg	analyses is to analysis as species is to	species	genus	0.19	0	1	{'genus': 0.19, 'species': 0.07, 'taxonomy': 0.04, 'organism': 0.03, 'population': 0.03}	1	0.0664062	0.125977	0.99999	original	target	0.5	TRUE	TRUE	TRUE	target	{'species': 0.5}
Verbal & Grammatical Forms	noun_plural_irreg	loss is to losses as series is to	series	series	0.08	1	1	{'series': 0.08, '______': 0.07, '?': 0.04, '"': 0.04, '__': 0.03}	0	0.0805664	0	1	original	target	0.5	TRUE	TRUE	TRUE	target	{'series': 0.5}
Verbal & Grammatical Forms	noun_plural_irreg	societies is to society as species is to	species	the	0.14	0	0	{'the': 0.14, 'ecosystem': 0.14, 'nature': 0.09, 'bios': 0.06, '': 0.05}	6	0.0419922	0.100586	0.99994	original	target	0.5	TRUE	TRUE	TRUE	target	{'species': 0.5}
Verbal & Grammatical Forms	noun_plural_irreg	abilities is to ability as series is to	series	sequence	0.05	0	0	{'sequence': 0.05, '______': 0.05, '': 0.03, '?': 0.04}	6	0.0274658	0.0272217	0.99994	original	target	0.5	TRUE	TRUE	TRUE	target	{'series': 0.5}
Verbal & Grammatical Forms	noun_plural_irreg	community is to communities as species is to	species	species	0.19	1	1	{'species': 0.19, 'ecosystems': 0.19, 'communities': 0.08, 'populations': 0.06, 'bi': 0.05}	0	0.186523	0	1	original	target	0.49	TRUE	TRUE	TRUE	target	{'species': 0.49}
Verbal & Grammatical Forms	noun_plural_irreg	ability is to abilities as series is to	series	numbers	0.11	0	1	{'numbers': 0.11, 'series': 0.06, 'serial': 0.04, 'terms': 0.04, '______': 0.02}	1	0.0639648	0.0478516	0.99999	original	target	0.49	TRUE	TRUE	TRUE	target	{'series': 0.49}
Verbal & Grammatical Forms	noun_plural_irreg	businesses is to business as series is to	series	serial	0.06	0	1	{'serial': 0.06, '______': 0.05, 'series': 0.05, '__': 0.04, 'numbers': 0.03}	1	0.045166	0.0129395	0.99999	original	target	0.49	TRUE	TRUE	TRUE	target	{'series': 0.49}
Verbal & Grammatical Forms	noun_plural_irreg	losses is to loss as series is to	series	win	0.07	0	1	{'win': 0.07, '?': 0.06, '': 0.05, 'wins': 0.03, 'series': 0.03}	3	0.0339355	0.0378418	0.99997	original	target	0.48	TRUE	TRUE	TRUE	target	{'series': 0.48}
Verbal & Grammatical Forms	noun_plural_irreg	securities is to security as series is to	series	______	0.09	0	0	{'______': 0.09, 'sequence': 0.07, 'serial': 0.05, '__': 0.03, 'number': 0.03}	6	0.0219727	0.0708008	0.99994	original	target	0.46	TRUE	TRUE	TRUE	target	{'series': 0.46}
Verbal & Grammatical Forms	noun_plural_irreg	responsibilities is to responsibility as series is to	series	parallel	0.47	0	1	{'parallel': 0.47, 'responsibility': 0.05, 'series': 0.03, 'serial': 0.03, '______': 0.01}	2	0.0336914	0.433105	0.99998	original	target	0.45	TRUE	TRUE	TRUE	target	{'series': 0.45}
Verbal & Grammatical Forms	noun_plural_irreg	centuries is to century as series is to	series	series	0.07	1	1	{'series': 0.07, '?': 0.05, '______': 0.04, 'decade': 0.03, 'serial': 0.03}	0	0.074707	0	1	original	target	0.45	TRUE	TRUE	TRUE	target	{'series': 0.45}
Verbal & Grammatical Forms	noun_plural_irreg	armies is to army as species is to	species		0.12	0	0	{'': 0.05, '?': 0.07, 'what': 0.05, '______': 0.04}	14	0.0146484	0.108398	0.99986	original	target	0.44	TRUE	TRUE	TRUE	target	{'species': 0.44}
Verbal & Grammatical Forms	noun_plural_irreg	secretary is to secretaries as species is to	species	?	0.06	0	0	{'?': 0.06, '': 0.04, 'what': 0.05, '______': 0.04}	16	0.0175781	0.0437012	0.999841	original	target	0.42	TRUE	TRUE	TRUE	target	{'species': 0.42}
Verbal & Grammatical Forms	noun_plural_irreg	secretaries is to secretary as series is to	series		0.11	0	0	{'': 0.05, '?': 0.05, 'a': 0.05}	44	0.00335693	0.107483	0.999562	original	target	0.41	TRUE	TRUE	TRUE	target	{'series': 0.41}
Verbal & Grammatical Forms	noun_plural_irreg	secretary is to secretaries as series is to	series	?	0.12	0	0	{'?': 0.12, '': 0.04, 'a': 0.05}	24	0.00848389	0.108215	0.999761	original	target	0.37	TRUE	TRUE	TRUE	target	{'series': 0.37}
Verbal & Grammatical Forms	noun_plural_irreg	armies is to army as series is to	series		0.23	0	0	{'': 0.05, '?': 0.1, 'a': 0.04}	37	0.0032196	0.222366	0.999631	original	target	0.35	TRUE	TRUE	TRUE	target	{'series': 0.35}
Verbal & Grammatical Forms	noun_plural_irreg	safeties is to safety as series is to	series	series	0.34	1	1	{'series': 0.34, '______': 0.04, 'parallel': 0.04, 'serial': 0.02, 'circuit': 0.02}	0	0.34375	0	1	original	target	0.33	TRUE	TRUE	TRUE	target	{'series': 0.33}
Factual Knowledge	name_nationality	hitler is to German as kant is to	german	______	0.04	0	0	{'______': 0.04, 'Kant': 0.03, '_____': 0.03, 'what': 0.03, '"': 0.03}	6	0.0200195	0.0197754	0.99994	original	target	0.12	TRUE	TRUE	TRUE	target	{'german': 0.12}
Factual Knowledge	country_language	Bolivia is to Spanish as Guatemala is to	spanish	Spanish	0.19	1	1	{'Spanish': 0.19, '______': 0.07, 'May': 0.05, '': 0.04, '?': 0.03}	0	0.19043	0	1	original	target	0.11	TRUE	TRUE	TRUE	target	{'spanish': 0.11}
Factual Knowledge	name_nationality	beethoven is to German as hitler is to	german	German	0.11	1	1	{'German': 0.11, 'Austrian': 0.05, 'jew': 0.05, 'german': 0.04, 'a': 0.03}	0	0.105957	0	1	original	target	0.11	TRUE	TRUE	TRUE	target	{'german': 0.11}
Factual Knowledge	country_language	Argentina is to Spanish as Colombia is to	spanish	Spanish	0.39	1	1	{'Spanish': 0.39, '______': 0.06, 'what': 0.05, '__': 0.03, '?': 0.03}	0	0.388672	0	1	original	target	0.1	TRUE	TRUE	TRUE	target	{'spanish': 0.1}
Factual Knowledge	country_language	Ecuador is to Spanish as Guatemala is to	spanish	Spanish	0.23	1	1	{'Spanish': 0.23, '______': 0.06, ':': 0.05, '': 0.04, 'A': 0.04}	0	0.231445	0	1	original	target	0.1	TRUE	TRUE	TRUE	target	{'spanish': 0.1}
Factual Knowledge	country_language	Bolivia is to Spanish as Ecuador is to	spanish	Spanish	0.22	1	1	{'Spanish': 0.22, 'what': 0.06, '______': 0.05, '': 0.05, '?': 0.05}	0	0.216797	0	1	original		0.1	TRUE	TRUE	TRUE	target	{}
Factual Knowledge	name_nationality	kant is to German as wagner is to	german	English	0.22	0	1	{'English': 0.22, 'German': 0.06, 'French': 0.06, 'english': 0.05, 'Italian': 0.04}	1	0.0639648	0.158691	0.99999	original		0.1	TRUE	TRUE	TRUE	target	{}
Factual Knowledge	country_language	Argentina is to Spanish as Ecuador is to	spanish	Spanish	0.2	1	1	{'Spanish': 0.2, '______': 0.09, ':': 0.07, '__': 0.06, '?': 0.05}	0	0.196289	0	1	original	target	0.1	TRUE	TRUE	TRUE	target	{'spanish': 0.1}
Factual Knowledge	country_language	Colombia is to Spanish as Venezuela is to	spanish	Spanish	0.17	1	1	{'Spanish': 0.17, '______': 0.07, 'Portuguese': 0.06, 'what': 0.05, '?': 0.04}	0	0.170898	0	1	original	target	0.1	TRUE	TRUE	TRUE	target	{'spanish': 0.1}
Semantic Relations	animal_shelter	hornet is to nest as raven is to	nest	nest	0.12	1	1	{'nest': 0.12, '_____': 0.06, '______': 0.05, 'fly': 0.04, '': 0.04}	0	0.12207	0	1	original	related	0.1	FALSE	TRUE	TRUE	related	{'raven': 0.13}
Factual Knowledge	name_nationality	hitler is to German as marx is to	german	Russian	0.26	0	0	{'Russian': 0.26, 'Jew': 0.05, 'russian': 0.03, '______': 0.03, 'communism': 0.03}	25	0.00515747	0.258514	0.999751	original	target	0.1	TRUE	TRUE	TRUE	target	{'german': 0.1}
Factual Knowledge	name_nationality	hitler is to German as kepler is to	german	"	0.06	0	0	{'"': 0.06, 'what': 0.03, '___': 0.03, 'a': 0.03, '': 0.03}	13	0.0146484	0.0471191	0.99987	original	target	0.1	TRUE	TRUE	TRUE	target	{'german': 0.1}
Factual Knowledge	name_nationality	hegel is to German as kepler is to	german	English	0.18	0	1	{'English': 0.18, 'German': 0.06, 'english': 0.05, 'german': 0.04, 'Russian': 0.03}	1	0.0649414	0.111816	0.99999	original		0.09	TRUE	TRUE	TRUE	target	{}
Factual Knowledge	country_language	Mexico is to Spanish as Nicaragua is to	spanish	what	0.14	0	1	{'what': 0.14, 'Spanish': 0.1, '______': 0.09, '_____': 0.04, ':': 0.04}	1	0.100098	0.0366211	0.99999	original		0.09	FALSE	TRUE	TRUE	related	{}
Factual Knowledge	name_nationality	hitler is to German as wagner is to	german	music	0.14	0	1	{'music': 0.14, 'German': 0.04, 'german': 0.03, '______': 0.03, 'opera': 0.03}	1	0.0419922	0.0957031	0.99999	original		0.09	TRUE	TRUE	TRUE	target	{}
Factual Knowledge	country_language	Chile is to Spanish as Ecuador is to	spanish	Spanish	0.13	1	1	{'Spanish': 0.13, ':': 0.09, '______': 0.08, '?': 0.05, 'what': 0.05}	0	0.133789	0	1	original		0.09	TRUE	TRUE	TRUE	target	{}
Factual Knowledge	name_occupation	hume is to philosopher as spinoza is to	philosopher	?	0.12	0	1	{'?': 0.12, 'philosopher': 0.08, 'mathematic': 0.06, '': 0.05, 'what': 0.04}	1	0.0761719	0.0488281	0.99999	original		0.09	TRUE	TRUE	TRUE	target	{}
Factual Knowledge	name_nationality	hegel is to German as hitler is to	german	German	0.11	1	1	{'German': 0.11, 'jew': 0.07, 'Germany': 0.06, 'german': 0.04, 'Germans': 0.04}	0	0.106445	0	1	original		0.09	TRUE	TRUE	TRUE	target	{}
Factual Knowledge	name_nationality	beethoven is to German as leibniz is to	german	what	0.1	0	1	{'what': 0.1, '"': 0.1, 'german': 0.06, 'which': 0.04, 'German': 0.04}	2	0.0578613	0.0437012	0.99998	original		0.09	TRUE	TRUE	TRUE	target	{}
Factual Knowledge	name_nationality	kepler is to German as wagner is to	german	German	0.07	1	1	{'German': 0.07, '': 0.04, '?': 0.04, 'English': 0.03, 'what': 0.03}	0	0.0654297	0	1	original		0.09	TRUE	TRUE	TRUE	target	{}
Factual Knowledge	name_nationality	kant is to German as marx is to	german	English	0.35	0	0	{'English': 0.35, 'Russian': 0.11, 'French': 0.04, 'english': 0.03, 'Marx': 0.02}	21	0.0067749	0.340881	0.999791	original		0.09	TRUE	TRUE	TRUE	target	{}
Semantic Relations	animal_shelter	chinchilla is to nest as rat is to	nest	bur	0.23	0	0	{'bur': 0.23, '_____': 0.08, '______': 0.07, '__': 0.04, '': 0.04}	9	0.0158691	0.217529	0.99991	original	related	0.09	FALSE	TRUE	TRUE	related	{'rat': 0.12}
Factual Knowledge	country_language	Bahamas is to English as Ireland is to	english	Irish	0.22	0	0	{'Irish': 0.22, '______': 0.11, '_____': 0.06, '____': 0.05, '?': 0.05}	8	0.0291748	0.186646	0.99992	original		0.09	FALSE	TRUE	TRUE	related	{}
Factual Knowledge	name_nationality	beethoven is to German as mozart is to	german	a	0.12	0	0	{'a': 0.12, 'Austrian': 0.12, 'Italian': 0.09, 'A': 0.07, 'italian': 0.06}	56	0.00188446	0.118233	0.999442	original		0.09	TRUE	TRUE	TRUE	target	{}
Factual Knowledge	country_language	Guyana is to English as Usa is to	english	English	0.29	1	1	{'English': 0.29, 'Spanish': 0.24, 'American': 0.03, '______': 0.02, 'spanish': 0.02}	0	0.292969	0	1	original		0.08	FALSE	TRUE	TRUE	related	{}
Factual Knowledge	name_nationality	marx is to German as wagner is to	german	music	0.25	0	1	{'music': 0.25, 'German': 0.07, 'French': 0.04, 'English': 0.03, 'german': 0.03}	1	0.0678711	0.184082	0.99999	original		0.08	TRUE	TRUE	TRUE	target	{}
Factual Knowledge	country_language	Ecuador is to Spanish as Venezuela is to	spanish	Spanish	0.24	1	1	{'Spanish': 0.24, '______': 0.05, 'what': 0.05, 'A': 0.03, '': 0.03}	0	0.236328	0	1	original		0.08	TRUE	TRUE	TRUE	target	{}
Factual Knowledge	name_nationality	leibniz is to German as marx is to	german	Russian	0.19	0	1	{'Russian': 0.19, 'English': 0.1, 'German': 0.07, 'Jewish': 0.04, 'russian': 0.02}	2	0.0654297	0.124023	0.99998	original		0.08	TRUE	TRUE	TRUE	target	{}
Factual Knowledge	name_nationality	hegel is to German as mozart is to	german	music	0.34	0	0	{'music': 0.34, 'Austrian': 0.22, 'Austria': 0.05, 'Italian': 0.04, 'aust': 0.02}	7	0.0167236	0.319214	0.99993	original		0.08	TRUE	TRUE	TRUE	target	{}
Semantic Relations	animal_shelter	cricket is to nest as locust is to	nest	swarm	0.34	0	0	{'swarm': 0.34, 'plague': 0.13, '______': 0.05, '_____': 0.04, '__': 0.03}	337	0.000107765	0.341689	0.996642	original		0.08	FALSE	TRUE	TRUE	related	{}
Semantic Relations	animal_shelter	crow is to nest as insect is to	nest	bur	0.23	0	0	{'bur': 0.23, 'eat': 0.12, 'hive': 0.07, 'sting': 0.05, 'poll': 0.05}	17	0.00759888	0.220917	0.999831	original	related	0.08	FALSE	TRUE	TRUE	related	{'insect': 0.12}
Factual Knowledge	name_nationality	hegel is to German as marx is to	german	English	0.19	0	0	{'English': 0.19, 'Russian': 0.18, 'American': 0.05, 'French': 0.03, 'english': 0.03}	9	0.0137939	0.176636	0.99991	original		0.08	TRUE	TRUE	TRUE	target	{}
Semantic Relations	animal_shelter	scorpion is to nest as wasp is to	nest	sting	0.18	0	0	{'sting': 0.18, 'bur': 0.1, 'build': 0.08, 'fly': 0.06, 'dig': 0.04}	6	0.0229492	0.157715	0.99994	original		0.08	TRUE	TRUE	TRUE	target	{}
Factual Knowledge	country_language	Canada is to English as Guyana is to	english	A	0.13	0	0	{'A': 0.13, '______': 0.1, 'Cre': 0.07, 'Spanish': 0.04, 'what': 0.04}	5	0.0356445	0.0961914	0.99995	original		0.08	TRUE	TRUE	TRUE	target	{}
Factual Knowledge	name_occupation	hume is to philosopher as kant is to	philosopher	philosopher	0.24	1	1	{'philosopher': 0.24, '?': 0.03, '': 0.05, 'what': 0.04}	0	0.240234	0	1	original		0.07	TRUE	TRUE	TRUE	target	{}
Factual Knowledge	country_language	Bolivia is to Spanish as Colombia is to	spanish	Colombian	0.19	0	1	{'Colombian': 0.19, 'Spanish': 0.11, '______': 0.09, 'English': 0.07, '__': 0.06}	1	0.11084	0.0834961	0.99999	original		0.07	TRUE	TRUE	TRUE	target	{}
Factual Knowledge	name_nationality	kepler is to German as marx is to	german	Russian	0.19	0	1	{'Russian': 0.19, 'English': 0.09, 'German': 0.05, 'russian': 0.03, 'Marx': 0.02}	2	0.0456543	0.146729	0.99998	original		0.07	TRUE	TRUE	TRUE	target	{}
Factual Knowledge	country_language	Bolivia is to Spanish as Nicaragua is to	spanish	Spanish	0.18	1	1	{'Spanish': 0.18, '______': 0.08, '_____': 0.06, 'what': 0.05, 'English': 0.04}	0	0.177734	0	1	original		0.07	FALSE	TRUE	TRUE	related	{}
Factual Knowledge	name_nationality	leibniz is to German as wagner is to	german	German	0.12	1	1	{'German': 0.12, 'music': 0.11, 'german': 0.09, 'opera': 0.04, '______': 0.03}	0	0.120117	0	1	original		0.07	TRUE	TRUE	TRUE	target	{}
Factual Knowledge	name_nationality	dickens is to English as hawking is to	english	American	0.1	0	1	{'American': 0.1, 'English': 0.08, 'physics': 0.07, 'what': 0.04, '"': 0.02}	1	0.0791016	0.0161133	0.99999	original		0.07	FALSE	TRUE	TRUE	related	{}
Factual Knowledge	name_nationality	hawking is to English as locke is to	english	English	0.09	1	1	{'English': 0.09, 'American': 0.07, 'French': 0.06, '': 0.02, '______': 0.02}	0	0.0917969	0	1	original		0.07	FALSE	TRUE	TRUE	related	{}
Morphological Modifiers	verb+able_reg	acceptable is to accept as foreseeable is to	foresee	accept	0.24	0	0	{'accept': 0.24, 'be': 0.03, 'make': 0.02, 'take': 0.02, 'assume': 0.02}	21	0.00717163	0.23111	0.999791	original		0.07	TRUE	TRUE	TRUE	target	{}
Semantic Hierarchies	hypernyms_animals	canine is to dog as canine is to	wolf	dog	0.1	0	0	{'dog': 0.1, '______': 0.07, '____': 0.07, 'cat': 0.06, '_____': 0.04}	6	0.0339355	0.064209	0.99994	original		0.07	TRUE	TRUE	TRUE	target	{}
Semantic Relations	animal_shelter	mouse is to nest as scorpion is to	nest	______	0.1	0	0	{'______': 0.1, 'sting': 0.06, '_____': 0.06, 'bur': 0.05, '__': 0.05}	24	0.00668335	0.0914612	0.999761	original		0.07	FALSE	TRUE	TRUE	related	{}
Semantic Hierarchies	hypernyms_animals	coyote is to canine as jackal is to	canine	canine	0.33	1	1	{'canine': 0.33, '': 0.03, '"': 0.03, ':': 0.03}	0	0.328125	0	1	original		0.06	FALSE	TRUE	TRUE	out-of-context	{}
Factual Knowledge	country_language	Bolivia is to Spanish as Cuba is to	spanish	Spanish	0.29	1	1	{'Spanish': 0.29, '______': 0.07, '_____': 0.05, 'English': 0.04, 'what': 0.04}	0	0.294922	0	1	original		0.06	TRUE	TRUE	TRUE	target	{}
Factual Knowledge	name_occupation	hegel is to philosopher as spinoza is to	philosopher	mathematic	0.25	0	1	{'mathematic': 0.25, 'philosopher': 0.06, 'scientist': 0.06, 'theolog': 0.05, 'physicist': 0.03}	1	0.0639648	0.187988	0.99999	original		0.06	TRUE	TRUE	TRUE	target	{}
Semantic Hierarchies	hypernyms_animals	insect is to butterfly as canine is to	wolf	dog	0.2	0	1	{'dog': 0.2, '____': 0.06, 'wolf': 0.05, '______': 0.05, '': 0.04}	2	0.0537109	0.145508	0.99998	original		0.06	TRUE	TRUE	TRUE	target	{}
Factual Knowledge	capital_world	Sofia is to Bulgaria as Algiers is to	algeria	Algeria	0.12	1	1	{'Algeria': 0.12, 'what': 0.11, '______': 0.1, '__': 0.09, '___': 0.06}	0	0.119629	0	1	original		0.06	FALSE	TRUE	TRUE	out-of-context	{}
Factual Knowledge	country_language	Guam is to English as Usa is to	english	Spanish	0.1	0	1	{'Spanish': 0.1, '?': 0.08, 'English': 0.08, 'America': 0.06, 'American': 0.05}	2	0.0751953	0.0209961	0.99998	original		0.06	FALSE	TRUE	TRUE	related	{}
Factual Knowledge	capital_world	Vienna is to Austria as Algiers is to	algeria	what	0.1	0	1	{'what': 0.1, ':': 0.08, 'Algeria': 0.06, '': 0.04, 'which': 0.04}	2	0.0583496	0.0407715	0.99998	original		0.06	TRUE	TRUE	TRUE	target	{}
Factual Knowledge	name_nationality	dickens is to English as locke is to	english	English	0.07	1	1	{'English': 0.07, 'american': 0.07, 'American': 0.06, 'english': 0.05, 'philosophy': 0.03}	0	0.0688477	0	1	original		0.06	FALSE	TRUE	TRUE	related	{}
Semantic Relations	animal_shelter	crow is to nest as rat is to	nest	bur	0.38	0	0	{'bur': 0.38, '_____': 0.08, '______': 0.03, 'gn': 0.03, '__': 0.02}	18	0.00799561	0.37677	0.999821	original	related	0.06	FALSE	TRUE	TRUE	related	{'rat': 0.11}
Semantic Relations	animal_shelter	hornet is to nest as locust is to	nest	swarm	0.35	0	0	{'swarm': 0.35, 'plague': 0.07, 'eat': 0.06, 'migrate': 0.04, 'fly': 0.04}	53	0.00146484	0.346191	0.999472	original		0.06	FALSE	TRUE	TRUE	related	{}
Factual Knowledge	country_language	Australia is to English as Bahamas is to	english	Spanish	0.17	0	0	{'Spanish': 0.17, '______': 0.12, 'Cre': 0.07, 'A': 0.05, '?': 0.03}	24	0.00540161	0.162567	0.999761	original		0.06	TRUE	TRUE	TRUE	target	{}
Factual Knowledge	name_nationality	kepler is to German as mozart is to	german	Austrian	0.11	0	0	{'Austrian': 0.11, 'a': 0.09, 'music': 0.05, 'A': 0.05, 'what': 0.04}	25	0.00708008	0.100342	0.999751	original		0.06	TRUE	TRUE	TRUE	target	{}
Semantic Hierarchies	hypernyms_animals	snake is to anaconda as canine is to	fox	dog	0.09	0	0	{'dog': 0.09, '______': 0.06, 'wolf': 0.05, 'what': 0.05, '____': 0.04}	110	0.00114441	0.0843048	0.998904	original		0.06	TRUE	TRUE	TRUE	target	{}
Semantic Hierarchies	hypernyms_animals	feline is to cat as fowl is to	chicken	______	0.09	0	0	{'______': 0.09, 'what': 0.06, '____': 0.06, '"': 0.06, '_____': 0.05}	6	0.0319824	0.0549316	0.99994	original		0.06	TRUE	TRUE	TRUE	target	{}
Semantic Relations	animal_shelter	cockroach is to nest as scorpion is to	nest	______	0.09	0	0	{'______': 0.09, '_____': 0.07, '__': 0.05, '': 0.04, 'bur': 0.04}	11	0.0198975	0.0748291	0.99989	original		0.06	FALSE	TRUE	TRUE	related	{}
Semantic Relations	animal_shelter	insect is to nest as scorpion is to	nest	_____	0.08	0	0	{'_____': 0.08, '': 0.04, '______': 0.07, 'bur': 0.06}	28	0.00527954	0.0723572	0.999721	original		0.06	FALSE	TRUE	TRUE	related	{}
Factual Knowledge	capital_world	Algiers is to Algeria as Antananarivo is to	madagascar	Madagascar	0.47	1	1	{'Madagascar': 0.47, 'what': 0.12, '__': 0.04, '?': 0.03, ':': 0.02}	0	0.474609	0	1	original		0.05	FALSE	FALSE	TRUE	out-of-context	{}
Semantic Hierarchies	hypernyms_animals	bovid is to buffalo as canine is to	wolf	dog	0.35	0	1	{'dog': 0.35, '______': 0.06, 'wolf': 0.04, '_____': 0.04, '____': 0.03}	2	0.0393066	0.312256	0.99998	original		0.05	FALSE	FALSE	TRUE	out-of-context	{}
Factual Knowledge	name_nationality	descartes is to French as rousseau is to	french	French	0.16	1	1	{'French': 0.16, 'french': 0.09, '': 0.04, "''": 0.03, '"': 0.03}	0	0.162109	0	1	original		0.05	FALSE	TRUE	TRUE	example_key	{}
Factual Knowledge	capital_world	Tegucigalpa is to Honduras as Algiers is to	algeria	______	0.15	0	1	{'______': 0.15, 'Algeria': 0.13, 'what': 0.1, '__': 0.09, ':': 0.07}	1	0.134766	0.0175781	0.99999	original		0.05	FALSE	FALSE	TRUE	out-of-context	{}
Factual Knowledge	country_language	Argentina is to Spanish as Nicaragua is to	spanish	Spanish	0.13	1	1	{'Spanish': 0.13, '______': 0.12, 'what': 0.1, 'English': 0.04, '_____': 0.04}	0	0.132812	0	1	original		0.05	FALSE	TRUE	TRUE	related	{}
Mathematics	math_division2	50 is to 25 as 74 is to	37	x	0.66	0	0	{'x': 0.66, 'what': 0.09, 'y': 0.08, '': 0.08, 'X': 0.04}	6139	8.78936e-09	0.664062	0.938825	original		0.05	FALSE	FALSE	FALSE	out-of-context	{}
Mathematics	math_division2	90 is to 45 as 74 is to	37	x	0.66	0	0	{'x': 0.66, 'y': 0.11, '': 0.08, 'what': 0.07, 'X': 0.03}	5076	1.39698e-08	0.660156	0.949418	original		0.05	FALSE	FALSE	TRUE	out-of-context	{}
Mathematics	math_division2	6 is to 3 as 74 is to	37	x	0.64	0	0	{'x': 0.64, 'y': 0.11, '': 0.08, 'what': 0.08, 'X': 0.04}	7138	1.59489e-08	0.636719	0.92887	original		0.05	FALSE	FALSE	TRUE	out-of-context	{}
Mathematics	math_division2	12 is to 6 as 74 is to	37	x	0.64	0	0	{'x': 0.64, 'y': 0.11, '': 0.11, 'what': 0.07, 'X': 0.02}	6256	1.26311e-08	0.636719	0.937659	original		0.05	FALSE	FALSE	TRUE	out-of-context	{}
Mathematics	math_division2	16 is to 8 as 74 is to	37	x	0.6	0	0	{'x': 0.6, 'y': 0.12, 'what': 0.11, '': 0.1, 'X': 0.02}	4412	2.64263e-08	0.597656	0.956035	original		0.05	FALSE	FALSE	FALSE	out-of-context	{}
Mathematics	math_division2	4 is to 2 as 74 is to	37	x	0.55	0	0	{'x': 0.55, '': 0.14, 'what': 0.1, 'y': 0.08, 'X': 0.05}	4304	6.00703e-08	0.550781	0.957111	original		0.05	FALSE	TRUE	TRUE	out-of-context	{}
Mathematics	math_division2	66 is to 33 as 74 is to	37	x	0.46	0	0	{'x': 0.46, 'what': 0.17, 'y': 0.16, '': 0.09, 'X': 0.04}	3217	6.28643e-08	0.462891	0.967943	original		0.05	FALSE	FALSE	TRUE	out-of-context	{}
Semantic Relations	animal_sound	scream is to chimpanzee as howl is to	fox	wolf	0.46	0	0	{'wolf': 0.46, '?': 0.07, '______': 0.04, 'dog': 0.03, 'coy': 0.03}	49	0.00143433	0.463409	0.999512	original		0.05	TRUE	TRUE	TRUE	target	{}
Semantic Relations	animal_shelter	insect is to nest as mouse is to	nest	bur	0.42	0	0	{'bur': 0.42, '_____': 0.09, '______': 0.05, '__': 0.04, '': 0.03}	12	0.00982666	0.410095	0.99988	original		0.05	FALSE	FALSE	FALSE	related	{}
Mathematics	math_division2	58 is to 29 as 74 is to	37	x	0.35	0	0	{'x': 0.35, 'y': 0.27, 'what': 0.23, '': 0.06, 'Y': 0.03}	2915	3.79514e-08	0.353516	0.970952	original		0.05	FALSE	FALSE	TRUE	out-of-context	{}
Semantic Hierarchies	hypernyms_animals	fowl is to quail as canine is to	wolf	dog	0.18	0	0	{'dog': 0.18, '______': 0.05, '____': 0.04, '?': 0.04, 'a': 0.04}	12	0.0224609	0.154297	0.99988	original		0.05	FALSE	FALSE	FALSE	out-of-context	{}
Morphological Modifiers	over+adj_reg	shadowed is to overshadowed as sold is to	oversold	?	0.15	0	0	{'?': 0.15, 'sold': 0.12, '': 0.06, ':': 0.06}	243	0.000120163	0.1532	0.997579	original		0.05	FALSE	FALSE	FALSE	out-of-context	{}
Semantic Relations	animal_shelter	insect is to nest as snake is to	nest	_____	0.11	0	0	{'_____': 0.11, 'bur': 0.06, '______': 0.05, '': 0.05, '__': 0.03}	27	0.00662231	0.103729	0.999731	original		0.05	FALSE	FALSE	FALSE	related	{}
Semantic Hierarchies	hypernyms_misc	clothes is to shirt as clothes is to	skirt	pant	0.09	0	0	{'pant': 0.09, 'pants': 0.08, '': 0.05, 'what': 0.04, '?': 0.03}	39	0.00430298	0.0821228	0.999611	original		0.05	FALSE	TRUE	TRUE	related	{}
Semantic Hierarchies	hypernyms_animals	insect is to ant as fowl is to	chicken		0.07	0	0	{'': 0.04, '______': 0.05, 'what': 0.05, ':': 0.04}	10	0.0227051	0.052002	0.9999	original		0.05	FALSE	TRUE	TRUE	out-of-context	{}
Factual Knowledge	name_occupation	confucius is to philosopher as marx is to	philosopher	economist	0.06	0	0	{'economist': 0.06, 'what': 0.05, '?': 0.05, '': 0.05, '______': 0.04}	6	0.0288086	0.0322266	0.99994	original		0.05	FALSE	FALSE	TRUE	related	{}
Semantic Relations	animal_shelter	chinchilla is to nest as cockroach is to	nest	______	0.06	0	0	{'______': 0.06, 'crawl': 0.05, '': 0.05, '__': 0.04, '_____': 0.03}	7	0.0150146	0.0408936	0.99993	original		0.05	FALSE	FALSE	TRUE	related	{}
Semantic Hierarchies	hypernyms_animals	primate is to human as canine is to	wolf	dog	0.5	0	1	{'dog': 0.5, 'wolf': 0.12, '____': 0.04, '______': 0.03, '_____': 0.02}	1	0.118652	0.379395	0.99999	original		0.04	FALSE	FALSE	FALSE	out-of-context	{}
Semantic Relations	animal_shelter	hornet is to nest as mouse is to	nest	bur	0.32	0	1	{'bur': 0.32, '_____': 0.05, '__': 0.04, '______': 0.04, 'nest': 0.04}	3	0.0405273	0.277832	0.99997	original		0.04	FALSE	FALSE	FALSE	related	{}
Factual Knowledge	capital_world	Quito is to Ecuador as Antananarivo is to	madagascar	what	0.31	0	1	{'what': 0.31, '?': 0.09, 'Madagascar': 0.09, '': 0.04, ':': 0.03}	2	0.0864258	0.224121	0.99998	original		0.04	FALSE	FALSE	FALSE	out-of-context	{}
Verbal & Grammatical Forms	verb_inf_Ved	achieved is to achieve as decided is to	decide	achieve	0.29	0	1	{'achieve': 0.29, 'be': 0.08, 'decide': 0.05, 'have': 0.02, 'do': 0.02}	2	0.0471191	0.241943	0.99998	original		0.04	FALSE	FALSE	FALSE	out-of-context	{}
Factual Knowledge	capital_world	Zagreb is to Croatia as Antananarivo is to	madagascar	Madagascar	0.27	1	1	{'Madagascar': 0.27, 'what': 0.21, '__': 0.05, '?': 0.04, '______': 0.03}	0	0.273438	0	1	original		0.04	FALSE	FALSE	FALSE	out-of-context	{}
Factual Knowledge	name_occupation	locke is to philosopher as plato is to	philosopher	philosopher	0.26	1	1	{'philosopher': 0.26, '?': 0.04, 'what': 0.03, '': 0.03}	0	0.263672	0	1	original		0.04	FALSE	FALSE	FALSE	related	{}
Semantic Hierarchies	hypernyms_animals	feline is to tiger as canine is to	wolf	dog	0.25	0	1	{'dog': 0.25, 'wolf': 0.13, '____': 0.07, '______': 0.04, '_____': 0.04}	1	0.132812	0.115234	0.99999	original		0.04	FALSE	FALSE	FALSE	out-of-context	{}
Factual Knowledge	capital_world	Doha is to Qatar as Kathmandu is to	nepal	Nepal	0.24	1	1	{'Nepal': 0.24, ':': 0.05, ':"': 0.1, 'which': 0.03}	0	0.243164	0	1	original		0.04	FALSE	FALSE	FALSE	out-of-context	{}
Semantic Hierarchies	hyponyms_misc	daypack is to backpack as hamburger is to	burger	hamburger	0.24	0	1	{'hamburger': 0.24, 'beef': 0.2, 'ham': 0.18, 'cow': 0.1, 'burger': 0.05}	4	0.0539551	0.188232	0.99996	original		0.04	FALSE	FALSE	FALSE	out-of-context	{}
Semantic Hierarchies	hypernyms_animals	beetle is to insect as butterfly is to	insect	insect	0.23	1	1	{'insect': 0.23, 'butterfly': 0.06, '______': 0.06, '?': 0.05, '__': 0.04}	0	0.232422	0	1	original		0.04	FALSE	FALSE	FALSE	out-of-context	{}
Verbal & Grammatical Forms	plural	car is to cars as hand is to	hands	hands	0.22	1	1	{'hands': 0.22, '?': 0.03, 'a': 0.06, '"': 0.04}	0	0.223633	0	1	original		0.04	FALSE	FALSE	FALSE	out-of-context	{}
Verbal & Grammatical Forms	plural	elephant is to elephants as finger is to	fingers	fingers	0.2	1	1	{'fingers': 0.2, 'hands': 0.1, '______': 0.05, '_': 0.05, '': 0.04}	0	0.200195	0	1	original		0.04	FALSE	FALSE	FALSE	out-of-context	{}
Factual Knowledge	capital_world	Tunis is to Tunisia as Antananarivo is to	madagascar	what	0.18	0	1	{'what': 0.18, 'Madagascar': 0.18, '?': 0.06, 'which': 0.03, '': 0.03}	1	0.182617	0	0.99999	original		0.04	FALSE	FALSE	FALSE	out-of-context	{}
Morphological Modifiers	verb+able_reg	acceptable is to accept as imaginable is to	imagine	accept	0.18	0	1	{'accept': 0.18, 'imagine': 0.08, 'allow': 0.04, 'admit': 0.04, 'be': 0.03}	1	0.078125	0.0976562	0.99999	original		0.04	FALSE	FALSE	FALSE	out-of-context	{}
Verbal & Grammatical Forms	plural	color is to colors as hand is to	hands	hands	0.15	1	1	{'hands': 0.15, '?': 0.04, 'a': 0.06, '': 0.04}	0	0.154297	0	1	original		0.04	FALSE	FALSE	FALSE	out-of-context	{}
Factual Knowledge	capital_world	Vaduz is to Liechtenstein as Algiers is to	algeria	what	0.14	0	1	{'what': 0.14, ':': 0.12, '?': 0.1, 'Algeria': 0.06, '': 0.05}	3	0.0600586	0.0834961	0.99997	original		0.04	FALSE	FALSE	FALSE	out-of-context	{}
Factual Knowledge	name_nationality	descartes is to French as lavoisier is to	french	what	0.12	0	1	{'what': 0.12, 'French': 0.07, '': 0.06, 'french': 0.06, '?': 0.05}	1	0.0688477	0.0517578	0.99999	original		0.04	FALSE	FALSE	FALSE	out-of-context	{}
Morphological Modifiers	comparative	low is to lower as young is to	younger	______	0.08	0	1	{'______': 0.08, 'young': 0.08, 'younger': 0.07, 'old': 0.05, '': 0.05}	2	0.0678711	0.0136719	0.99998	original		0.04	FALSE	FALSE	FALSE	out-of-context	{}
Semantic Hierarchies	hypernyms_animals	dinosaur is to tyrannosaurus as canine is to	wolf	dog	0.08	0	1	{'dog': 0.08, '"': 0.04, 'wolf': 0.03, ':': 0.03, '”': 0.03}	2	0.0344238	0.0432129	0.99998	original		0.04	FALSE	FALSE	FALSE	out-of-context	{}
Mathematics	math_double	30 is to 60 as 8 is to	16	x	0.8	0	0	{'x': 0.8, 'y': 0.06, '': 0.06, 'what': 0.04, 'X': 0.01}	386	4.20958e-07	0.796875	0.996154	original		0.04	FALSE	FALSE	FALSE	out-of-context	{}
Mathematics	math_division5	15 is to 3 as 80 is to	16	x	0.8	0	0	{'x': 0.8, 'y': 0.09, '': 0.03, 'what': 0.03, '\\(': 0.02}	1183	7.07805e-08	0.796875	0.988211	original		0.04	FALSE	FALSE	FALSE	out-of-context	{}
Mathematics	math_division2	64 is to 32 as 32 is to	16		0.8	0	0	{'': 0.8, 'x': 0.05, 'the': 0.03, 'what': 0.02, 'X': 0.02}	51	0.000144958	0.804543	0.999492	original		0.04	FALSE	FALSE	FALSE	out-of-context	{}
Mathematics	math_division5	30 is to 6 as 80 is to	16	x	0.79	0	0	{'x': 0.79, 'y': 0.11, '': 0.03, 'what': 0.03, 'X': 0.01}	537	2.01166e-07	0.789062	0.994649	original		0.04	FALSE	FALSE	FALSE	out-of-context	{}
Mathematics	math_double	65 is to 130 as 8 is to	16	x	0.76	0	0	{'x': 0.76, '': 0.08, 'what': 0.07, 'y': 0.05, 'X': 0.01}	333	4.76837e-07	0.757812	0.996682	original		0.04	FALSE	FALSE	FALSE	out-of-context	{}
Mathematics	math_division5	10 is to 2 as 80 is to	16	x	0.76	0	0	{'x': 0.76, 'y': 0.11, 'what': 0.05, '': 0.03, 'X': 0.02}	978	1.11293e-07	0.757812	0.990254	original		0.04	FALSE	FALSE	FALSE	out-of-context	{}
Mathematics	math_squares	30 is to 900 as 14 is to	196	x	0.73	0	0	{'x': 0.73, 'what': 0.08, '': 0.06, 'y': 0.05, 'X': 0.03}	11598	1.97906e-09	0.734375	0.884427	original		0.04	FALSE	FALSE	FALSE	out-of-context	{}
Mathematics	math_squares	20 is to 400 as 14 is to	196	x	0.72	0	0	{'x': 0.72, '': 0.08, 'what': 0.07, 'y': 0.05, 'X': 0.04}	13573	1.75351e-09	0.722656	0.864746	original		0.04	FALSE	FALSE	FALSE	out-of-context	{}
Mathematics	math_division2	100 is to 50 as 74 is to	37	x	0.72	0	0	{'x': 0.72, 'what': 0.08, 'y': 0.07, '': 0.05, 'X': 0.04}	6557	7.39237e-09	0.722656	0.93466	original		0.04	FALSE	FALSE	FALSE	out-of-context	{}
Mathematics	math_division2	30 is to 15 as 74 is to	37	x	0.71	0	0	{'x': 0.71, '': 0.08, 'y': 0.07, 'what': 0.07, 'X': 0.03}	6072	6.95582e-09	0.707031	0.939493	original		0.04	FALSE	FALSE	FALSE	out-of-context	{}
Mathematics	math_double	95 is to 190 as 98 is to	196	x	0.69	0	0	{'x': 0.69, 'y': 0.1, 'what': 0.09, '\\(': 0.04, '': 0.03}	8734	5.61704e-09	0.6875	0.912966	original		0.04	FALSE	FALSE	FALSE	out-of-context	{}
Mathematics	math_double	50 is to 100 as 8 is to	16	x	0.68	0	0	{'x': 0.68, 'what': 0.1, '': 0.08, 'y': 0.07, 'X': 0.02}	509	3.70666e-07	0.679687	0.994928	original		0.04	FALSE	FALSE	FALSE	out-of-context	{}
Mathematics	math_double	6 is to 12 as 84 is to	168	x	0.68	0	0	{'x': 0.68, 'y': 0.14, 'what': 0.05, '': 0.04, 'X': 0.04}	17351	1.6953e-09	0.683594	0.827099	original		0.04	FALSE	FALSE	FALSE	out-of-context	{}
Mathematics	math_double	75 is to 150 as 8 is to	16	x	0.68	0	0	{'x': 0.68, '': 0.14, 'what': 0.08, 'y': 0.03, 'X': 0.03}	788	1.83471e-07	0.679687	0.992148	original		0.04	FALSE	FALSE	FALSE	out-of-context	{}
Mathematics	math_double	70 is to 140 as 84 is to	168	x	0.68	0	0	{'x': 0.68, 'y': 0.11, 'what': 0.09, '': 0.06, 'X': 0.02}	9239	3.0559e-09	0.675781	0.907934	original		0.04	FALSE	FALSE	FALSE	out-of-context	{}
Mathematics	math_division2	40 is to 20 as 74 is to	37	x	0.68	0	0	{'x': 0.68, 'y': 0.1, '': 0.09, 'what': 0.07, 'X': 0.03}	5096	1.14669e-08	0.675781	0.949219	original		0.04	FALSE	FALSE	FALSE	out-of-context	{}
Mathematics	math_division2	28 is to 14 as 74 is to	37	x	0.67	0	0	{'x': 0.67, 'y': 0.09, 'what': 0.09, '': 0.06, 'X': 0.04}	6150	1.39116e-08	0.667969	0.938716	original		0.04	FALSE	FALSE	FALSE	out-of-context	{}
Mathematics	math_squares	15 is to 225 as 14 is to	196	x	0.67	0	0	{'x': 0.67, 'what': 0.13, '': 0.08, 'y': 0.05, 'X': 0.03}	9644	3.50701e-09	0.667969	0.903898	original		0.04	FALSE	FALSE	FALSE	out-of-context	{}
Mathematics	math_double	95 is to 190 as 8 is to	16	x	0.66	0	0	{'x': 0.66, '': 0.14, 'what': 0.07, 'y': 0.06, 'X': 0.02}	663	4.45172e-07	0.65625	0.993393	original		0.04	FALSE	FALSE	FALSE	out-of-context	{}
Mathematics	math_double	95 is to 190 as 65 is to	130	x	0.66	0	0	{'x': 0.66, 'y': 0.08, '': 0.07, 'what': 0.05, 'X': 0.04}	2419	5.70435e-08	0.65625	0.975895	original		0.04	FALSE	FALSE	FALSE	out-of-context	{}
Mathematics	math_division2	24 is to 12 as 74 is to	37	x	0.66	0	0	{'x': 0.66, 'what': 0.11, 'y': 0.08, '': 0.07, 'X': 0.02}	6004	1.27475e-08	0.664062	0.940171	original		0.04	FALSE	FALSE	FALSE	out-of-context	{}
Mathematics	math_division2	20 is to 10 as 74 is to	37	x	0.66	0	0	{'x': 0.66, 'what': 0.1, '': 0.09, 'y': 0.08, 'X': 0.03}	5481	1.38534e-08	0.65625	0.945382	original		0.04	FALSE	FALSE	FALSE	out-of-context	{}
Mathematics	math_division2	10 is to 5 as 28 is to	14	x	0.66	0	0	{'x': 0.66, 'y': 0.16, 'what': 0.07, '': 0.04, 'X': 0.03}	1073	1.59256e-07	0.660156	0.989308	original		0.04	FALSE	FALSE	FALSE	out-of-context	{}
Mathematics	math_double	22 is to 44 as 8 is to	16	x	0.65	0	0	{'x': 0.65, 'what': 0.14, '': 0.08, 'y': 0.06, 'X': 0.02}	134	1.07288e-05	0.652333	0.998665	original		0.04	FALSE	FALSE	FALSE	out-of-context	{}
Mathematics	math_double	100 is to 200 as 98 is to	196	x	0.65	0	0	{'x': 0.65, 'what': 0.12, 'y': 0.07, 'X': 0.06, '': 0.05}	11963	1.94996e-09	0.652344	0.88079	original		0.04	FALSE	FALSE	FALSE	out-of-context	{}
Mathematics	math_division2	50 is to 25 as 32 is to	16	x	0.65	0	0	{'x': 0.65, 'y': 0.1, 'what': 0.09, '': 0.06, 'X': 0.03}	820	2.33762e-07	0.648437	0.991829	original		0.04	FALSE	FALSE	FALSE	out-of-context	{}
Mathematics	math_division2	12 is to 6 as 32 is to	16	x	0.65	0	0	{'x': 0.65, 'y': 0.18, 'what': 0.07, '': 0.05, '\\(': 0.01}	419	4.80562e-07	0.648437	0.995825	original		0.04	FALSE	FALSE	FALSE	out-of-context	{}
Mathematics	math_division2	80 is to 40 as 74 is to	37	x	0.65	0	0	{'x': 0.65, 'y': 0.12, '': 0.09, 'what': 0.06, 'X': 0.03}	5977	1.18162e-08	0.648437	0.94044	original		0.04	FALSE	FALSE	FALSE	out-of-context	{}
Mathematics	math_double	12 is to 24 as 84 is to	168	x	0.64	0	0	{'x': 0.64, 'what': 0.1, 'y': 0.1, '': 0.07, 'X': 0.03}	14371	1.73895e-09	0.636719	0.856794	original		0.04	FALSE	FALSE	FALSE	out-of-context	{}
Mathematics	math_double	80 is to 160 as 65 is to	130	x	0.64	0	0	{'x': 0.64, '': 0.15, 'y': 0.06, 'X': 0.05, 'what': 0.05}	1015	1.08965e-07	0.636719	0.989886	original		0.04	FALSE	FALSE	FALSE	out-of-context	{}
Mathematics	math_double	60 is to 120 as 65 is to	130	x	0.64	0	0	{'x': 0.64, 'y': 0.12, '': 0.07, 'what': 0.05, 'X': 0.05}	1172	9.17353e-08	0.644531	0.988321	original		0.04	FALSE	FALSE	FALSE	out-of-context	{}
Mathematics	math_double	76 is to 152 as 8 is to	16	x	0.64	0	0	{'x': 0.64, 'what': 0.15, '': 0.1, 'y': 0.04, 'X': 0.02}	311	1.08778e-06	0.640624	0.996901	original		0.04	FALSE	FALSE	FALSE	out-of-context	{}
Mathematics	math_double	70 is to 140 as 98 is to	196	x	0.64	0	0	{'x': 0.64, '': 0.11, 'what': 0.11, 'y': 0.07, 'X': 0.03}	7503	4.27826e-09	0.636719	0.925233	original		0.04	FALSE	FALSE	FALSE	out-of-context	{}
Mathematics	math_division2	26 is to 13 as 74 is to	37	x	0.64	0	0	{'x': 0.64, 'y': 0.13, 'what': 0.09, '': 0.04, 'X': 0.04}	5971	1.11759e-08	0.640625	0.940499	original		0.04	FALSE	FALSE	FALSE	out-of-context	{}
Mathematics	math_squares	24 is to 576 as 14 is to	196	x	0.64	0	0	{'x': 0.64, '': 0.13, 'what': 0.11, 'y': 0.04, 'X': 0.03}	11626	4.04543e-09	0.636719	0.884148	original		0.04	FALSE	FALSE	FALSE	out-of-context	{}
Mathematics	math_division2	8 is to 4 as 28 is to	14	x	0.64	0	0	{'x': 0.64, 'y': 0.15, 'what': 0.08, '': 0.04, 'X': 0.03}	1267	1.57394e-07	0.640625	0.987374	original		0.04	FALSE	FALSE	FALSE	out-of-context	{}
Mathematics	math_division2	10 is to 5 as 74 is to	37	x	0.64	0	0	{'x': 0.64, 'y': 0.11, '': 0.08, 'what': 0.07, 'X': 0.03}	6559	1.59489e-08	0.644531	0.93464	original		0.04	FALSE	FALSE	FALSE	out-of-context	{}
Mathematics	math_division2	70 is to 35 as 74 is to	37	x	0.64	0	0	{'x': 0.64, 'y': 0.14, 'what': 0.07, '': 0.07, '\\(': 0.02}	5072	1.68802e-08	0.636719	0.949458	original		0.04	FALSE	FALSE	FALSE	out-of-context	{}
Mathematics	math_double	100 is to 200 as 84 is to	168	x	0.63	0	0	{'x': 0.63, 'what': 0.11, '': 0.07, 'X': 0.07, 'y': 0.06}	14122	1.6953e-09	0.628906	0.859275	original		0.04	FALSE	FALSE	FALSE	out-of-context	{}
Mathematics	math_double	60 is to 120 as 84 is to	168	x	0.63	0	0	{'x': 0.63, 'y': 0.15, 'what': 0.09, '': 0.05, 'X': 0.03}	11686	1.76806e-09	0.632812	0.88355	original		0.04	FALSE	FALSE	FALSE	out-of-context	{}
Mathematics	math_double	74 is to 148 as 8 is to	16	x	0.63	0	0	{'x': 0.63, 'what': 0.14, '': 0.12, 'y': 0.04, 'X': 0.03}	273	1.31875e-06	0.628905	0.99728	original		0.04	FALSE	FALSE	FALSE	out-of-context	{}
Mathematics	math_division2	40 is to 20 as 32 is to	16	x	0.63	0	0	{'x': 0.63, 'y': 0.15, 'what': 0.09, '': 0.05, 'X': 0.03}	817	2.16067e-07	0.628906	0.991859	original		0.04	FALSE	FALSE	FALSE	out-of-context	{}
Mathematics	math_division2	14 is to 7 as 74 is to	37	x	0.63	0	0	{'x': 0.63, 'y': 0.11, 'what': 0.08, '': 0.06, 'X': 0.03}	8444	1.25729e-08	0.632812	0.915856	original		0.04	FALSE	FALSE	FALSE	out-of-context	{}
Mathematics	math_division2	8 is to 4 as 74 is to	37	x	0.63	0	0	{'x': 0.63, 'y': 0.1, '': 0.09, 'what': 0.08, 'X': 0.04}	6341	1.9907e-08	0.628906	0.936812	original		0.04	FALSE	FALSE	FALSE	out-of-context	{}
Mathematics	math_double	30 is to 60 as 84 is to	168	x	0.62	0	0	{'x': 0.62, 'y': 0.13, '': 0.08, 'what': 0.07, 'X': 0.04}	12514	2.53203e-09	0.625	0.875299	original		0.04	FALSE	FALSE	FALSE	out-of-context	{}
Mathematics	math_double	65 is to 130 as 98 is to	196	x	0.62	0	0	{'x': 0.62, 'y': 0.13, 'what': 0.11, '': 0.06, '\\(': 0.03}	9863	2.80852e-09	0.617187	0.901716	original		0.04	FALSE	FALSE	FALSE	out-of-context	{}
Mathematics	math_division2	34 is to 17 as 74 is to	37	x	0.62	0	0	{'x': 0.62, 'y': 0.12, 'what': 0.09, '': 0.08, 'X': 0.03}	2869	4.6799e-08	0.617187	0.971411	original		0.04	FALSE	FALSE	FALSE	out-of-context	{}
Mathematics	math_division2	36 is to 18 as 74 is to	37	x	0.62	0	0	{'x': 0.62, '': 0.11, 'y': 0.1, 'what': 0.09, 'X': 0.03}	4110	1.53668e-08	0.625	0.959044	original		0.04	FALSE	FALSE	FALSE	out-of-context	{}
Mathematics	math_squares	6 is to 36 as 14 is to	196	x	0.62	0	0	{'x': 0.62, 'what': 0.12, 'y': 0.12, '': 0.06, 'X': 0.03}	16983	2.40107e-09	0.617187	0.830766	original		0.04	FALSE	FALSE	FALSE	out-of-context	{}
Mathematics	math_squares	12 is to 144 as 14 is to	196	x	0.62	0	0	{'x': 0.62, 'what': 0.14, 'y': 0.12, '': 0.05, '\\(': 0.02}	13586	1.75351e-09	0.617187	0.864617	original		0.04	FALSE	FALSE	FALSE	out-of-context	{}
Mathematics	math_double	35 is to 70 as 98 is to	196	x	0.61	0	0	{'x': 0.61, 'y': 0.12, '': 0.09, 'what': 0.09, 'X': 0.03}	10844	3.14321e-09	0.609375	0.89194	original		0.04	FALSE	FALSE	FALSE	out-of-context	{}
Mathematics	math_double	30 is to 60 as 98 is to	196	x	0.61	0	0	{'x': 0.61, '': 0.12, 'y': 0.1, 'what': 0.08, 'X': 0.05}	10943	3.30328e-09	0.613281	0.890954	original		0.04	FALSE	FALSE	FALSE	out-of-context	{}
Mathematics	math_double	50 is to 100 as 98 is to	196	x	0.61	0	0	{'x': 0.61, 'what': 0.13, 'y': 0.1, '': 0.06, 'X': 0.05}	18061	1.26602e-09	0.605469	0.820024	original		0.04	FALSE	FALSE	FALSE	out-of-context	{}
Mathematics	math_double	20 is to 40 as 84 is to	168	x	0.61	0	0	{'x': 0.61, '': 0.11, 'y': 0.11, 'what': 0.08, 'X': 0.04}	12799	2.18279e-09	0.605469	0.872459	original		0.04	FALSE	FALSE	FALSE	out-of-context	{}
Mathematics	math_double	80 is to 160 as 84 is to	168	x	0.61	0	0	{'x': 0.61, 'y': 0.11, 'what': 0.11, '': 0.1, 'X': 0.03}	7244	6.46105e-09	0.605469	0.927814	original		0.04	FALSE	FALSE	FALSE	out-of-context	{}
Mathematics	math_double	65 is to 130 as 84 is to	168	x	0.61	0	0	{'x': 0.61, 'y': 0.18, 'what': 0.1, '': 0.03, '\\(': 0.03}	12516	1.80444e-09	0.613281	0.875279	original		0.04	FALSE	FALSE	FALSE	out-of-context	{}
Mathematics	math_division2	48 is to 24 as 74 is to	37	x	0.61	0	0	{'x': 0.61, 'what': 0.12, 'y': 0.1, '': 0.08, 'X': 0.03}	4049	2.49129e-08	0.613281	0.959652	original		0.04	FALSE	FALSE	FALSE	out-of-context	{}
Mathematics	math_double	4 is to 8 as 84 is to	168	x	0.61	0	0	{'x': 0.61, 'y': 0.12, 'what': 0.09, '': 0.07, 'X': 0.04}	13069	5.00586e-09	0.613281	0.869768	original		0.04	FALSE	FALSE	FALSE	out-of-context	{}
Mathematics	math_double	90 is to 180 as 98 is to	196	x	0.6	0	0	{'x': 0.6, 'what': 0.14, 'y': 0.12, '': 0.06, 'X': 0.03}	9397	4.27826e-09	0.601562	0.90636	original		0.04	FALSE	FALSE	FALSE	out-of-context	{}
Mathematics	math_double	55 is to 110 as 8 is to	16	x	0.6	0	0	{'x': 0.6, 'what': 0.14, '': 0.13, 'y': 0.08, 'X': 0.01}	225	1.52737e-06	0.597655	0.997758	original		0.04	FALSE	FALSE	FALSE	out-of-context	{}
Mathematics	math_double	18 is to 36 as 84 is to	168	x	0.59	0	0	{'x': 0.59, 'y': 0.16, 'what': 0.11, '': 0.06, 'X': 0.03}	13057	2.45927e-09	0.59375	0.869888	original		0.04	FALSE	FALSE	FALSE	out-of-context	{}
Mathematics	math_double	90 is to 180 as 84 is to	168	x	0.59	0	0	{'x': 0.59, 'what': 0.14, 'y': 0.12, '': 0.06, 'X': 0.02}	10605	3.7835e-09	0.589844	0.894322	original		0.04	FALSE	FALSE	FALSE	out-of-context	{}
Mathematics	math_double	95 is to 190 as 84 is to	168	x	0.59	0	0	{'x': 0.59, 'y': 0.14, 'what': 0.1, '': 0.06, '\\(': 0.05}	12523	4.27826e-09	0.59375	0.875209	original		0.04	FALSE	FALSE	FALSE	out-of-context	{}
Mathematics	math_squares	5 is to 25 as 14 is to	196	x	0.59	0	0	{'x': 0.59, 'what': 0.14, 'y': 0.09, '': 0.07, 'X': 0.05}	17537	1.60071e-09	0.59375	0.825245	original		0.04	FALSE	FALSE	FALSE	out-of-context	{}
Mathematics	math_squares	6 is to 36 as 4 is to	16	x	0.59	0	0	{'x': 0.59, 'what': 0.17, '': 0.1, 'y': 0.07, 'X': 0.02}	328	1.18464e-06	0.593749	0.996732	original		0.04	FALSE	FALSE	FALSE	out-of-context	{}
Mathematics	math_division2	22 is to 11 as 74 is to	37	x	0.59	0	0	{'x': 0.59, 'y': 0.13, 'what': 0.1, '': 0.07, '\\(': 0.02}	5371	2.37487e-08	0.59375	0.946478	original		0.04	FALSE	FALSE	FALSE	out-of-context	{}
Mathematics	math_division2	96 is to 48 as 74 is to	37	x	0.59	0	0	{'x': 0.59, 'what': 0.12, 'y': 0.11, '': 0.09, 'X': 0.02}	4296	2.43308e-08	0.589844	0.957191	original		0.04	FALSE	FALSE	FALSE	out-of-context	{}
Mathematics	math_double	2 is to 4 as 84 is to	168	x	0.59	0	0	{'x': 0.59, 'y': 0.11, '': 0.09, 'what': 0.07, 'X': 0.07}	14023	4.80213e-09	0.589844	0.860262	original		0.04	FALSE	FALSE	FALSE	out-of-context	{}
Mathematics	math_division2	86 is to 43 as 74 is to	37	x	0.59	0	0	{'x': 0.59, 'y': 0.2, 'what': 0.06, '': 0.05, 'X': 0.03}	4636	1.57161e-08	0.585937	0.953803	original		0.04	FALSE	FALSE	TRUE	out-of-context	{}
Mathematics	math_division2	86 is to 43 as 32 is to	16	x	0.59	0	0	{'x': 0.59, 'y': 0.22, 'what': 0.05, '': 0.03, '\\(': 0.03}	382	6.29574e-07	0.589843	0.996193	original		0.04	FALSE	FALSE	FALSE	out-of-context	{}
Mathematics	math_double	52 is to 104 as 65 is to	130	x	0.58	0	0	{'x': 0.58, 'what': 0.12, '': 0.09, 'y': 0.09, 'X': 0.05}	2123	8.61473e-08	0.578125	0.978844	original		0.04	FALSE	FALSE	FALSE	out-of-context	{}
Mathematics	math_double	46 is to 92 as 8 is to	16	x	0.58	0	0	{'x': 0.58, 'what': 0.2, '': 0.1, 'y': 0.07, '\\(': 0.01}	173	3.41237e-06	0.582028	0.998276	original		0.04	FALSE	FALSE	FALSE	out-of-context	{}
Mathematics	math_squares	10 is to 100 as 4 is to	16	x	0.58	0	0	{'x': 0.58, 'what': 0.14, 'y': 0.1, '': 0.06, 'X': 0.04}	723	3.59491e-07	0.582031	0.992795	original		0.04	FALSE	FALSE	FALSE	out-of-context	{}
Mathematics	math_division2	60 is to 30 as 74 is to	37	x	0.58	0	0	{'x': 0.58, 'y': 0.15, '': 0.09, 'what': 0.08, 'X': 0.04}	3882	1.47847e-08	0.582031	0.961316	original		0.04	FALSE	FALSE	FALSE	out-of-context	{}
Mathematics	math_double	5 is to 10 as 84 is to	168	x	0.57	0	0	{'x': 0.57, 'y': 0.13, 'what': 0.12, '': 0.08, 'X': 0.04}	19268	1.59343e-09	0.574219	0.807996	original		0.04	FALSE	FALSE	FALSE	out-of-context	{}
Mathematics	math_double	24 is to 48 as 84 is to	168	x	0.57	0	0	{'x': 0.57, 'what': 0.12, 'y': 0.12, '': 0.08, 'X': 0.04}	11445	4.36557e-09	0.574219	0.885951	original		0.04	FALSE	FALSE	FALSE	out-of-context	{}
Mathematics	math_squares	2 is to 4 as 14 is to	196	x	0.57	0	0	{'x': 0.57, 'y': 0.12, 'what': 0.1, '': 0.08, 'X': 0.07}	14283	3.75439e-09	0.570312	0.857671	original		0.04	FALSE	FALSE	FALSE	out-of-context	{}
Mathematics	math_division2	18 is to 9 as 74 is to	37	x	0.57	0	0	{'x': 0.57, 'y': 0.16, 'what': 0.11, '': 0.08, 'X': 0.02}	4624	2.11876e-08	0.570312	0.953922	original		0.04	FALSE	FALSE	FALSE	out-of-context	{}
Mathematics	math_division2	72 is to 36 as 74 is to	37	x	0.57	0	0	{'x': 0.57, 'y': 0.14, 'what': 0.11, '': 0.08, '\\(': 0.03}	4020	3.37604e-08	0.566406	0.959941	original		0.04	FALSE	FALSE	FALSE	out-of-context	{}
Mathematics	math_squares	8 is to 64 as 14 is to	196	x	0.56	0	0	{'x': 0.56, 'what': 0.16, 'y': 0.11, '': 0.06, 'X': 0.05}	14343	3.3906e-09	0.558594	0.857073	original		0.04	FALSE	FALSE	FALSE	out-of-context	{}
Mathematics	math_double	22 is to 44 as 98 is to	196	x	0.55	0	0	{'x': 0.55, 'what': 0.13, '': 0.1, 'y': 0.09, 'X': 0.06}	9530	8.78936e-09	0.550781	0.905034	original		0.04	FALSE	FALSE	FALSE	out-of-context	{}
Mathematics	math_division2	32 is to 16 as 74 is to	37	x	0.55	0	0	{'x': 0.55, 'what': 0.16, '': 0.12, 'y': 0.06, 'X': 0.05}	3200	5.40167e-08	0.554687	0.968112	original		0.04	FALSE	FALSE	FALSE	out-of-context	{}
Mathematics	math_division2	38 is to 19 as 74 is to	37	x	0.55	0	0	{'x': 0.55, 'y': 0.16, 'what': 0.12, '': 0.06, 'X': 0.04}	2997	3.44589e-08	0.554687	0.970135	original		0.04	FALSE	FALSE	FALSE	out-of-context	{}
Mathematics	math_squares	10 is to 100 as 14 is to	196	x	0.55	0	0	{'x': 0.55, 'what': 0.15, 'y': 0.11, '': 0.06, 'X': 0.06}	12529	3.15777e-09	0.550781	0.875149	original		0.04	FALSE	FALSE	FALSE	out-of-context	{}
Mathematics	math_squares	16 is to 256 as 14 is to	196	x	0.55	0	0	{'x': 0.55, 'what': 0.2, 'y': 0.08, '': 0.07, 'X': 0.04}	12577	4.5693e-09	0.550781	0.874671	original		0.04	FALSE	FALSE	FALSE	out-of-context	{}
Mathematics	math_double	2 is to 4 as 8 is to	16	x	0.55	0	0	{'x': 0.55, 'y': 0.15, 'what': 0.14, '': 0.06, 'X': 0.05}	278	2.01166e-06	0.550779	0.99723	original		0.04	FALSE	FALSE	FALSE	out-of-context	{}
Mathematics	math_double	40 is to 80 as 84 is to	168	x	0.54	0	0	{'x': 0.54, 'y': 0.16, 'what': 0.1, '': 0.1, 'X': 0.03}	13167	2.83762e-09	0.542969	0.868792	original		0.04	FALSE	FALSE	FALSE	out-of-context	{}
Mathematics	math_double	5 is to 10 as 98 is to	196	x	0.54	0	0	{'x': 0.54, 'what': 0.13, 'y': 0.12, '': 0.11, 'X': 0.04}	11352	4.62751e-09	0.535156	0.886878	original		0.04	FALSE	FALSE	FALSE	out-of-context	{}
Mathematics	math_double	25 is to 50 as 84 is to	168	x	0.54	0	0	{'x': 0.54, 'y': 0.13, 'what': 0.12, '': 0.1, 'X': 0.04}	13264	2.38651e-09	0.542969	0.867825	original		0.04	FALSE	FALSE	FALSE	out-of-context	{}
Mathematics	math_double	24 is to 48 as 98 is to	196	x	0.54	0	0	{'x': 0.54, 'what': 0.13, '': 0.12, 'y': 0.09, 'X': 0.05}	11299	4.97676e-09	0.535156	0.887406	original		0.04	FALSE	FALSE	FALSE	out-of-context	{}
Mathematics	math_double	22 is to 44 as 84 is to	168	x	0.54	0	0	{'x': 0.54, 'what': 0.13, 'y': 0.12, '': 0.08, 'X': 0.05}	13479	5.47152e-09	0.539062	0.865683	original		0.04	FALSE	FALSE	FALSE	out-of-context	{}
Mathematics	math_double	64 is to 128 as 84 is to	168	x	0.54	0	0	{'x': 0.54, 'what': 0.15, 'y': 0.14, '': 0.05, 'X': 0.03}	8244	1.13505e-08	0.542969	0.917849	original		0.04	FALSE	FALSE	FALSE	out-of-context	{}
Mathematics	math_division2	52 is to 26 as 74 is to	37	x	0.54	0	0	{'x': 0.54, 'what': 0.15, 'y': 0.15, '': 0.06, 'X': 0.03}	2687	4.14439e-08	0.535156	0.973224	original		0.04	FALSE	FALSE	FALSE	out-of-context	{}
Mathematics	math_division2	56 is to 28 as 74 is to	37	x	0.54	0	0	{'x': 0.54, 'y': 0.15, 'what': 0.14, '': 0.09, 'X': 0.02}	2847	2.82889e-08	0.542969	0.97163	original		0.04	FALSE	FALSE	FALSE	out-of-context	{}
Mathematics	math_division2	42 is to 21 as 74 is to	37	x	0.54	0	0	{'x': 0.54, 'y': 0.16, 'what': 0.12, '': 0.08, '\\(': 0.03}	4584	1.57161e-08	0.535156	0.954321	original		0.04	FALSE	FALSE	FALSE	out-of-context	{}
Mathematics	math_squares	25 is to 625 as 14 is to	196	x	0.54	0	0	{'x': 0.54, 'what': 0.16, '': 0.14, 'y': 0.05, 'X': 0.04}	11575	4.39468e-09	0.539062	0.884656	original		0.04	FALSE	FALSE	FALSE	out-of-context	{}
Mathematics	math_double	4 is to 8 as 98 is to	196	x	0.54	0	0	{'x': 0.54, 'y': 0.11, 'what': 0.11, '': 0.11, 'X': 0.05}	8148	1.18744e-08	0.535156	0.918806	original		0.04	FALSE	FALSE	FALSE	out-of-context	{}
Factual Knowledge	capital_world	Zimbabwe is to Harare as Bahrain is to	manama	?	0.53	0	0	{'?': 0.03, '': 0.05, 'what': 0.04}	176	2.92063e-05	0.531221	0.998246	original		0.04	FALSE	FALSE	FALSE	out-of-context	{}
Mathematics	math_double	36 is to 72 as 98 is to	196	x	0.53	0	0	{'x': 0.53, '': 0.13, 'y': 0.13, 'what': 0.11, 'X': 0.03}	11320	4.27826e-09	0.53125	0.887197	original		0.04	FALSE	FALSE	FALSE	out-of-context	{}
Mathematics	math_double	52 is to 104 as 84 is to	168	x	0.53	0	0	{'x': 0.53, 'what': 0.22, 'y': 0.1, '': 0.05, 'X': 0.04}	7506	9.0804e-09	0.527344	0.925203	original		0.04	FALSE	FALSE	FALSE	out-of-context	{}
Mathematics	math_double	25 is to 50 as 98 is to	196	x	0.53	0	0	{'x': 0.53, '': 0.13, 'what': 0.12, 'y': 0.11, 'X': 0.06}	8936	4.5402e-09	0.527344	0.910953	original		0.04	FALSE	FALSE	FALSE	out-of-context	{}
Mathematics	math_double	26 is to 52 as 84 is to	168	x	0.53	0	0	{'x': 0.53, 'what': 0.16, 'y': 0.14, 'X': 0.05, '': 0.04}	13295	4.86034e-09	0.53125	0.867516	original		0.04	FALSE	FALSE	FALSE	out-of-context	{}
Mathematics	math_double	85 is to 170 as 98 is to	196	x	0.53	0	0	{'x': 0.53, 'what': 0.17, 'y': 0.13, '': 0.1, '\\(': 0.02}	8290	5.87897e-09	0.527344	0.917391	original		0.04	FALSE	FALSE	FALSE	out-of-context	{}
Mathematics	math_double	86 is to 172 as 98 is to	196	x	0.53	0	0	{'x': 0.53, 'what': 0.16, 'y': 0.14, '': 0.09, 'X': 0.02}	4230	3.0268e-08	0.53125	0.957848	original		0.04	FALSE	FALSE	FALSE	out-of-context	{}
Mathematics	math_double	56 is to 112 as 84 is to	168	x	0.53	0	0	{'x': 0.53, 'what': 0.19, 'y': 0.15, '': 0.06, '\\(': 0.02}	8562	5.00586e-09	0.527344	0.91468	original		0.04	FALSE	FALSE	FALSE	out-of-context	{}
Mathematics	math_squares	18 is to 324 as 14 is to	196	x	0.53	0	0	{'x': 0.53, 'what': 0.23, 'y': 0.08, '': 0.07, 'X': 0.02}	13925	3.89991e-09	0.53125	0.861238	original		0.04	FALSE	FALSE	FALSE	out-of-context	{}
Mathematics	math_squares	22 is to 484 as 14 is to	196	x	0.52	0	0	{'x': 0.52, 'what': 0.21, '': 0.11, 'y': 0.06, 'X': 0.04}	9116	1.12341e-08	0.523437	0.90916	original		0.04	FALSE	FALSE	FALSE	out-of-context	{}
Mathematics	math_double	15 is to 30 as 98 is to	196	x	0.51	0	0	{'x': 0.51, '': 0.15, 'what': 0.13, 'y': 0.11, 'X': 0.05}	9915	3.37604e-09	0.507812	0.901198	original		0.04	FALSE	FALSE	FALSE	out-of-context	{}
Mathematics	math_double	10 is to 20 as 84 is to	168	x	0.51	0	0	{'x': 0.51, 'what': 0.14, '': 0.12, 'y': 0.11, 'X': 0.05}	14228	2.60479e-09	0.511719	0.858219	original		0.04	FALSE	FALSE	FALSE	out-of-context	{}
Mathematics	math_division2	88 is to 44 as 74 is to	37	x	0.51	0	0	{'x': 0.51, 'what': 0.16, 'y': 0.15, '': 0.09, '\\(': 0.03}	3170	5.23869e-08	0.511719	0.968411	original		0.04	FALSE	FALSE	FALSE	out-of-context	{}
Mathematics	math_double	32 is to 64 as 84 is to	168	x	0.5	0	0	{'x': 0.5, 'what': 0.19, 'y': 0.12, '': 0.06, 'X': 0.05}	12257	6.49015e-09	0.503906	0.87786	original		0.04	FALSE	FALSE	FALSE	out-of-context	{}
Mathematics	math_double	34 is to 68 as 98 is to	196	x	0.5	0	0	{'x': 0.5, 'y': 0.24, 'what': 0.09, '\\(': 0.04, '': 0.04}	11004	8.84756e-09	0.503906	0.890346	original		0.04	FALSE	FALSE	FALSE	out-of-context	{}
Mathematics	math_double	45 is to 90 as 84 is to	168	x	0.5	0	0	{'x': 0.5, 'what': 0.19, 'y': 0.13, '': 0.07, '\\(': 0.04}	14630	1.89175e-09	0.503906	0.854213	original		0.04	FALSE	FALSE	FALSE	out-of-context	{}
Mathematics	math_double	18 is to 36 as 98 is to	196	x	0.5	0	0	{'x': 0.5, 'what': 0.16, '': 0.12, 'y': 0.12, 'X': 0.04}	10919	5.20959e-09	0.503906	0.891193	original		0.04	FALSE	FALSE	FALSE	out-of-context	{}
Mathematics	math_double	55 is to 110 as 65 is to	130	x	0.5	0	0	{'x': 0.5, 'y': 0.18, 'what': 0.15, '': 0.08, '\\(': 0.03}	1471	1.0198e-07	0.503906	0.985342	original		0.04	FALSE	FALSE	FALSE	out-of-context	{}
Mathematics	math_division2	54 is to 27 as 74 is to	37	x	0.5	0	0	{'x': 0.5, 'y': 0.16, 'what': 0.13, '': 0.11, 'X': 0.04}	2702	4.42378e-08	0.496094	0.973075	original		0.04	FALSE	FALSE	FALSE	out-of-context	{}
Mathematics	math_division2	46 is to 23 as 74 is to	37	x	0.5	0	0	{'x': 0.5, 'y': 0.21, 'what': 0.12, '': 0.07, 'X': 0.03}	3339	2.50293e-08	0.498047	0.966727	original		0.04	FALSE	FALSE	FALSE	out-of-context	{}
Mathematics	math_squares	4 is to 16 as 14 is to	196	x	0.5	0	0	{'x': 0.5, 'what': 0.18, 'y': 0.13, '': 0.07, 'X': 0.05}	13854	4.45289e-09	0.498047	0.861946	original		0.04	FALSE	FALSE	FALSE	out-of-context	{}
Mathematics	math_division2	98 is to 49 as 74 is to	37	x	0.5	0	0	{'x': 0.5, 'what': 0.17, 'y': 0.15, '': 0.07, 'X': 0.03}	3858	3.11993e-08	0.503906	0.961555	original		0.04	FALSE	FALSE	FALSE	out-of-context	{}
Mathematics	math_double	2 is to 4 as 98 is to	196	x	0.5	0	0	{'x': 0.5, '': 0.15, 'what': 0.11, 'y': 0.09, 'X': 0.07}	7990	1.44355e-08	0.498047	0.92038	original		0.04	FALSE	FALSE	FALSE	out-of-context	{}
Mathematics	math_double	42 is to 84 as 84 is to	168		0.49	0	0	{'': 0.49, 'x': 0.21, 'X': 0.08, 'what': 0.08, 'the': 0.03}	2141	3.31551e-07	0.488281	0.978665	original		0.04	FALSE	FALSE	FALSE	out-of-context	{}
Mathematics	math_double	28 is to 56 as 84 is to	168	x	0.49	0	0	{'x': 0.49, 'what': 0.2, 'y': 0.17, '': 0.04, 'X': 0.04}	10503	4.48199e-09	0.492187	0.895338	original		0.04	FALSE	FALSE	FALSE	out-of-context	{}
Mathematics	math_double	64 is to 128 as 98 is to	196	x	0.49	0	0	{'x': 0.49, 'what': 0.2, 'y': 0.11, '': 0.06, 'X': 0.05}	9455	7.85803e-09	0.492187	0.905782	original		0.04	FALSE	FALSE	FALSE	out-of-context	{}
Mathematics	math_division2	2 is to 1 as 74 is to	37	x	0.49	0	0	{'x': 0.49, '': 0.28, 'X': 0.06, 'y': 0.05, 'what': 0.04}	1873	3.46452e-07	0.486328	0.981336	original		0.04	FALSE	FALSE	FALSE	out-of-context	{}
Mathematics	math_division2	84 is to 42 as 74 is to	37	x	0.49	0	0	{'x': 0.49, 'y': 0.2, 'what': 0.15, '': 0.06, '\\(': 0.03}	4950	2.18861e-08	0.490234	0.950674	original		0.04	FALSE	FALSE	FALSE	out-of-context	{}
Mathematics	math_division2	82 is to 41 as 94 is to	47	x	0.49	0	0	{'x': 0.49, 'y': 0.25, 'what': 0.1, '': 0.06, '\\(': 0.03}	2129	5.68107e-08	0.494141	0.978785	original		0.04	FALSE	FALSE	FALSE	out-of-context	{}
Semantic Hierarchies	hypernyms_animals	feline is to cat as canine is to	fox	dog	0.49	0	0	{'dog': 0.49, '____': 0.06, '"': 0.04, '______': 0.03, '_____': 0.03}	482	2.14577e-05	0.486307	0.995197	original		0.04	FALSE	FALSE	FALSE	out-of-context	{}
Mathematics	math_double	78 is to 156 as 84 is to	168	x	0.48	0	0	{'x': 0.48, 'what': 0.2, 'y': 0.2, '': 0.06, 'X': 0.02}	8218	6.02449e-09	0.478516	0.918108	original		0.04	FALSE	FALSE	FALSE	out-of-context	{}
Mathematics	math_double	55 is to 110 as 98 is to	196	x	0.48	0	0	{'x': 0.48, 'y': 0.18, 'what': 0.17, '': 0.08, '\\(': 0.03}	9944	4.88944e-09	0.484375	0.900909	original		0.04	FALSE	FALSE	FALSE	out-of-context	{}
Mathematics	math_division2	78 is to 39 as 74 is to	37	x	0.48	0	0	{'x': 0.48, 'y': 0.17, 'what': 0.15, '': 0.1, 'X': 0.03}	3240	4.44707e-08	0.480469	0.967714	original		0.04	FALSE	FALSE	FALSE	out-of-context	{}
Mathematics	math_double	16 is to 32 as 84 is to	168	x	0.47	0	0	{'x': 0.47, 'what': 0.21, 'y': 0.11, '': 0.1, 'X': 0.05}	9872	7.567e-09	0.472656	0.901626	original		0.04	FALSE	FALSE	FALSE	out-of-context	{}
Mathematics	math_division2	56 is to 28 as 28 is to	14		0.47	0	0	{'': 0.47, 'x': 0.25, 'what': 0.11, 'X': 0.05, 'y': 0.02}	548	1.41561e-06	0.470702	0.994539	original		0.04	FALSE	FALSE	FALSE	out-of-context	{}
Mathematics	math_division2	94 is to 47 as 74 is to	37	x	0.47	0	0	{'x': 0.47, 'y': 0.17, 'what': 0.15, '': 0.09, 'X': 0.03}	3678	3.23635e-08	0.474609	0.963349	original		0.04	FALSE	FALSE	FALSE	out-of-context	{}
Mathematics	math_division2	82 is to 41 as 74 is to	37	x	0.47	0	0	{'x': 0.47, 'y': 0.21, 'what': 0.15, '': 0.08, '\\(': 0.03}	3441	3.53903e-08	0.466797	0.965711	original		0.04	FALSE	FALSE	FALSE	out-of-context	{}
Mathematics	math_double	48 is to 96 as 84 is to	168	x	0.46	0	0	{'x': 0.46, 'what': 0.25, 'y': 0.12, '': 0.07, 'X': 0.03}	12074	3.8126e-09	0.460937	0.879684	original		0.04	FALSE	FALSE	FALSE	out-of-context	{}
Mathematics	math_double	52 is to 104 as 98 is to	196	x	0.46	0	0	{'x': 0.46, 'what': 0.26, 'y': 0.09, '': 0.08, 'X': 0.05}	7269	1.22818e-08	0.462891	0.927565	original		0.04	FALSE	FALSE	FALSE	out-of-context	{}
Mathematics	math_double	8 is to 16 as 98 is to	196	x	0.46	0	0	{'x': 0.46, 'what': 0.17, '': 0.13, 'y': 0.09, 'X': 0.06}	7139	2.10712e-08	0.455078	0.92886	original		0.04	FALSE	FALSE	FALSE	out-of-context	{}
Mathematics	math_double	74 is to 148 as 84 is to	168	x	0.46	0	0	{'x': 0.46, 'what': 0.21, 'y': 0.2, '': 0.05, 'Y': 0.02}	10923	3.89991e-09	0.455078	0.891153	original		0.04	FALSE	FALSE	FALSE	out-of-context	{}
Mathematics	math_squares	28 is to 784 as 14 is to	196	x	0.46	0	0	{'x': 0.46, 'what': 0.22, '': 0.11, 'X': 0.07, 'y': 0.03}	3414	6.65896e-08	0.460937	0.96598	original		0.04	FALSE	FALSE	FALSE	out-of-context	{}
Mathematics	math_squares	22 is to 484 as 4 is to	16	x	0.46	0	0	{'x': 0.46, '': 0.22, 'what': 0.17, 'X': 0.05, 'y': 0.04}	436	1.54972e-06	0.45703	0.995655	original		0.04	FALSE	FALSE	FALSE	out-of-context	{}
Mathematics	math_division2	92 is to 46 as 74 is to	37	x	0.46	0	0	{'x': 0.46, 'what': 0.21, 'y': 0.17, '': 0.08, '\\(': 0.02}	2837	3.95812e-08	0.455078	0.97173	original		0.04	FALSE	FALSE	FALSE	out-of-context	{}
Mathematics	math_division2	64 is to 32 as 74 is to	37	x	0.46	0	0	{'x': 0.46, 'what': 0.15, 'y': 0.1, '': 0.1, 'X': 0.07}	1446	3.05474e-07	0.46289	0.985591	original		0.04	FALSE	FALSE	TRUE	out-of-context	{}
Mathematics	math_division2	84 is to 42 as 32 is to	16	x	0.46	0	0	{'x': 0.46, 'y': 0.25, 'what': 0.13, '': 0.04, '\\(': 0.03}	577	4.73112e-07	0.464843	0.99425	original		0.04	FALSE	FALSE	FALSE	out-of-context	{}
Mathematics	math_double	85 is to 170 as 84 is to	168	x	0.45	0	0	{'x': 0.45, 'what': 0.22, 'y': 0.13, '': 0.11, 'X': 0.02}	7684	1.07684e-08	0.453125	0.92343	original		0.04	FALSE	FALSE	FALSE	out-of-context	{}
Mathematics	math_double	76 is to 152 as 98 is to	196	x	0.45	0	0	{'x': 0.45, 'what': 0.26, 'y': 0.14, '': 0.08, 'X': 0.02}	6354	9.0804e-09	0.445312	0.936683	original		0.04	FALSE	FALSE	FALSE	out-of-context	{}
Mathematics	math_double	38 is to 76 as 98 is to	196	x	0.44	0	0	{'x': 0.44, 'what': 0.2, 'y': 0.16, '': 0.08, 'X': 0.04}	8030	1.01863e-08	0.435547	0.919982	original		0.04	FALSE	FALSE	FALSE	out-of-context	{}
Mathematics	math_double	68 is to 136 as 84 is to	168	x	0.44	0	0	{'x': 0.44, 'what': 0.25, 'y': 0.16, '': 0.08, 'X': 0.02}	8027	7.04313e-09	0.443359	0.920012	original		0.04	FALSE	FALSE	FALSE	out-of-context	{}
Mathematics	math_division2	76 is to 38 as 74 is to	37	x	0.44	0	0	{'x': 0.44, 'y': 0.25, 'what': 0.15, '': 0.07, '\\(': 0.02}	3500	3.60887e-08	0.441406	0.965123	original		0.04	FALSE	FALSE	FALSE	out-of-context	{}
Factual Knowledge	currency	dong is to Vietnam as real is to	brazil	fake	0.43	0	0	{'fake': 0.43, 'unreal': 0.07, 'reality': 0.05, 'surreal': 0.03, 'truth': 0.03}	814	3.55244e-05	0.433558	0.991889	original		0.04	FALSE	FALSE	FALSE	out-of-context	{}
Mathematics	math_double	66 is to 132 as 98 is to	196	x	0.43	0	0	{'x': 0.43, 'what': 0.22, '': 0.13, 'y': 0.13, 'X': 0.03}	8781	6.31553e-09	0.433594	0.912498	original		0.04	FALSE	FALSE	FALSE	out-of-context	{}
Mathematics	math_division2	92 is to 46 as 32 is to	16	x	0.43	0	0	{'x': 0.43, 'y': 0.21, 'what': 0.16, '': 0.08, '\\(': 0.03}	373	1.13249e-06	0.433593	0.996283	original		0.04	FALSE	FALSE	FALSE	out-of-context	{}
Mathematics	math_double	84 is to 168 as 98 is to	196	x	0.42	0	0	{'x': 0.42, 'what': 0.19, '': 0.15, 'y': 0.13, 'X': 0.04}	6163	1.46101e-08	0.423828	0.938586	original		0.04	FALSE	FALSE	FALSE	out-of-context	{}
Mathematics	math_double	62 is to 124 as 84 is to	168	x	0.42	0	0	{'x': 0.42, 'y': 0.23, 'what': 0.21, '': 0.06, '\\(': 0.02}	9400	5.64614e-09	0.419922	0.90633	original		0.04	FALSE	FALSE	FALSE	out-of-context	{}
Mathematics	math_double	54 is to 108 as 98 is to	196	x	0.42	0	0	{'x': 0.42, 'what': 0.2, 'y': 0.15, '': 0.12, 'X': 0.03}	10948	4.97676e-09	0.417969	0.890904	original		0.04	FALSE	FALSE	FALSE	out-of-context	{}
Mathematics	math_double	58 is to 116 as 98 is to	196	x	0.42	0	0	{'x': 0.42, 'what': 0.24, 'y': 0.15, '': 0.1, 'X': 0.02}	7603	1.04774e-08	0.416016	0.924237	original		0.04	FALSE	FALSE	FALSE	out-of-context	{}
Mathematics	math_division2	44 is to 22 as 32 is to	16	x	0.42	0	0	{'x': 0.42, 'y': 0.2, 'what': 0.2, '': 0.06, '\\(': 0.04}	418	9.98378e-07	0.417968	0.995835	original		0.04	FALSE	FALSE	FALSE	out-of-context	{}
Mathematics	math_division2	44 is to 22 as 74 is to	37	x	0.42	0	0	{'x': 0.42, 'what': 0.22, 'y': 0.15, '': 0.11, '\\(': 0.02}	2909	6.00703e-08	0.421875	0.971012	original		0.04	FALSE	FALSE	FALSE	out-of-context	{}
Mathematics	math_division2	68 is to 34 as 74 is to	37	x	0.42	0	0	{'x': 0.42, 'y': 0.21, 'what': 0.14, '': 0.1, 'Y': 0.03}	2873	5.89062e-08	0.423828	0.971371	original		0.04	FALSE	FALSE	FALSE	out-of-context	{}
Mathematics	math_double	42 is to 84 as 98 is to	196	x	0.41	0	0	{'x': 0.41, 'what': 0.18, 'y': 0.15, '': 0.13, 'X': 0.04}	10922	5.3551e-09	0.414062	0.891163	original		0.04	FALSE	FALSE	FALSE	out-of-context	{}
Mathematics	math_double	78 is to 156 as 98 is to	196	x	0.41	0	0	{'x': 0.41, 'what': 0.23, '': 0.14, 'y': 0.13, 'X': 0.03}	7682	7.18865e-09	0.414062	0.923449	original		0.04	FALSE	FALSE	FALSE	out-of-context	{}
Mathematics	math_double	82 is to 164 as 84 is to	168	x	0.41	0	0	{'x': 0.41, 'what': 0.28, 'y': 0.18, '': 0.05, '\\(': 0.01}	8181	1.4028e-08	0.412109	0.918477	original		0.04	FALSE	FALSE	FALSE	out-of-context	{}
Mathematics	math_double	74 is to 148 as 98 is to	196	x	0.41	0	0	{'x': 0.41, 'what': 0.25, 'y': 0.17, '': 0.08, 'X': 0.03}	7559	7.24685e-09	0.410156	0.924675	original		0.04	FALSE	FALSE	FALSE	out-of-context	{}
Mathematics	math_division2	62 is to 31 as 74 is to	37	x	0.41	0	0	{'x': 0.41, 'y': 0.24, 'what': 0.18, '': 0.07, 'Y': 0.03}	2798	3.49246e-08	0.412109	0.972118	original		0.04	FALSE	FALSE	FALSE	out-of-context	{}
Mathematics	math_double	34 is to 68 as 84 is to	168	x	0.4	0	0	{'x': 0.4, 'y': 0.38, 'what': 0.1, '\\(': 0.05, '': 0.02}	5253	1.94414e-08	0.400391	0.947654	original		0.04	FALSE	FALSE	FALSE	out-of-context	{}
Mathematics	math_double	44 is to 88 as 84 is to	168	x	0.4	0	0	{'x': 0.4, 'what': 0.21, 'y': 0.2, '': 0.08, '\\(': 0.04}	11675	7.07223e-09	0.400391	0.88366	original		0.04	FALSE	FALSE	FALSE	out-of-context	{}
Mathematics	math_double	94 is to 188 as 98 is to	196	x	0.4	0	0	{'x': 0.4, 'what': 0.24, 'y': 0.21, '': 0.07, '\\(': 0.03}	8044	1.05356e-08	0.398437	0.919842	original		0.04	FALSE	FALSE	FALSE	out-of-context	{}
Mathematics	math_double	16 is to 32 as 98 is to	196	x	0.39	0	0	{'x': 0.39, 'what': 0.2, '': 0.17, 'y': 0.1, 'X': 0.06}	8001	1.16997e-08	0.394531	0.920271	original		0.04	FALSE	FALSE	FALSE	out-of-context	{}
Mathematics	math_double	62 is to 124 as 98 is to	196	x	0.39	0	0	{'x': 0.39, 'what': 0.25, 'y': 0.17, '': 0.09, 'X': 0.03}	8235	7.6252e-09	0.390625	0.917939	original		0.04	FALSE	FALSE	FALSE	out-of-context	{}
Mathematics	math_double	68 is to 136 as 98 is to	196	x	0.39	0	0	{'x': 0.39, 'what': 0.25, 'y': 0.13, '': 0.13, 'X': 0.03}	7380	1.05938e-08	0.390625	0.926459	original		0.04	FALSE	FALSE	FALSE	out-of-context	{}
Mathematics	math_double	86 is to 172 as 84 is to	168	x	0.38	0	0	{'x': 0.38, 'what': 0.26, 'y': 0.18, '': 0.1, '\\(': 0.02}	9648	1.10595e-08	0.375	0.903858	original		0.04	FALSE	FALSE	FALSE	out-of-context	{}
Mathematics	math_squares	26 is to 676 as 14 is to	196	x	0.38	0	0	{'x': 0.38, 'what': 0.26, '': 0.17, 'X': 0.04, 'y': 0.02}	5603	5.54137e-08	0.382812	0.944167	original		0.04	FALSE	FALSE	FALSE	out-of-context	{}
Semantic Relations	animal_shelter	raven is to nest as scorpion is to	nest	sting	0.38	0	0	{'sting': 0.38, '______': 0.03, 'bur': 0.03, 'crawl': 0.03, '_____': 0.02}	8	0.012146	0.36676	0.99992	original		0.04	FALSE	FALSE	FALSE	example_key	{}
Mathematics	math_double	92 is to 184 as 98 is to	196	what	0.36	0	0	{'what': 0.36, 'x': 0.33, 'y': 0.19, '': 0.06, '\\(': 0.02}	6279	1.11759e-08	0.355469	0.93743	original		0.04	FALSE	FALSE	FALSE	out-of-context	{}
Mathematics	math_double	92 is to 184 as 84 is to	168	what	0.36	0	0	{'what': 0.36, 'x': 0.33, 'y': 0.16, '': 0.07, '\\(': 0.02}	8960	7.30506e-09	0.363281	0.910714	original		0.04	FALSE	FALSE	FALSE	out-of-context	{}
Mathematics	math_double	94 is to 188 as 84 is to	168	x	0.36	0	0	{'x': 0.36, 'what': 0.29, 'y': 0.17, '': 0.1, '\\(': 0.03}	9013	9.0804e-09	0.355469	0.910186	original		0.04	FALSE	FALSE	FALSE	out-of-context	{}
Mathematics	math_squares	26 is to 676 as 4 is to	16	x	0.36	0	0	{'x': 0.36, '': 0.31, 'what': 0.15, 'X': 0.04, '?': 0.02}	365	4.11272e-06	0.359371	0.996363	original		0.04	FALSE	FALSE	FALSE	out-of-context	{}
Mathematics	math_double	46 is to 92 as 98 is to	196	x	0.35	0	0	{'x': 0.35, 'what': 0.28, 'y': 0.2, '': 0.07, '\\(': 0.05}	10618	5.47152e-09	0.347656	0.894192	original		0.04	FALSE	FALSE	FALSE	out-of-context	{}
Mathematics	math_double	44 is to 88 as 98 is to	196	x	0.35	0	0	{'x': 0.35, 'y': 0.19, 'what': 0.18, '': 0.15, 'X': 0.03}	11307	8.96398e-09	0.349609	0.887327	original		0.04	FALSE	FALSE	FALSE	out-of-context	{}
Mathematics	math_double	46 is to 92 as 84 is to	168	x	0.35	0	0	{'x': 0.35, 'what': 0.31, 'y': 0.19, '': 0.06, '\\(': 0.04}	14051	3.23053e-09	0.351562	0.859983	original		0.04	FALSE	FALSE	FALSE	out-of-context	{}
Semantic Hierarchies	hypernyms_animals	bovid is to buffalo as canine is to	fox	dog	0.35	0	0	{'dog': 0.35, '______': 0.06, 'wolf': 0.04, '_____': 0.04, '____': 0.03}	79	0.000766754	0.350796	0.999213	original		0.04	FALSE	FALSE	FALSE	out-of-context	{}
Mathematics	math_double	98 is to 196 as 84 is to	168	x	0.34	0	0	{'x': 0.34, 'what': 0.3, 'y': 0.18, '': 0.08, '\\(': 0.03}	9499	7.15954e-09	0.34375	0.905343	original		0.04	FALSE	FALSE	FALSE	out-of-context	{}
Semantic Hierarchies	hypernyms_animals	fowl is to duck as canine is to	wolf	dog	0.31	0	0	{'dog': 0.31, '?': 0.04, '______': 0.04, '____': 0.03, '': 0.03}	16	0.0112305	0.297363	0.999841	original		0.04	FALSE	FALSE	FALSE	out-of-context	{}
Semantic Hierarchies	hypernyms_animals	fowl is to duck as canine is to	fox	dog	0.31	0	0	{'dog': 0.31, '?': 0.04, '______': 0.04, '____': 0.03, '': 0.03}	187	0.000184059	0.30841	0.998137	original		0.04	FALSE	FALSE	FALSE	out-of-context	{}
Verbal & Grammatical Forms	verb_3pSg_Ved	locates is to located as manages is to	managed		0.29	0	0	{'': 0.04, '?': 0.16, ':': 0.09}	926	7.51019e-06	0.287102	0.990772	original		0.04	FALSE	FALSE	FALSE	out-of-context	{}
Verbal & Grammatical Forms	verb_inf_Ving	applying is to apply as following is to	follow	apply	0.26	0	0	{'apply': 0.26, 'be': 0.04, 'use': 0.02, 'do': 0.02, 'the': 0.02}	5	0.0153809	0.240479	0.99995	original		0.04	FALSE	FALSE	FALSE	out-of-context	{}
Morphological Modifiers	over+adj_reg	laid is to overlaid as sold is to	oversold		0.21	0	0	{'': 0.09, '?': 0.13, ':': 0.11}	212	4.8399e-05	0.211866	0.997887	original		0.04	FALSE	FALSE	FALSE	out-of-context	{}
Verbal & Grammatical Forms	plural	pigs is to pig as birds is to	bird	______	0.19	0	0	{'______': 0.19, '_____': 0.07, '____': 0.06, 'what': 0.04, 'a': 0.03}	20	0.00854492	0.185791	0.999801	original		0.04	FALSE	FALSE	FALSE	out-of-context	{}
Semantic Hierarchies	hypernyms_misc	book is to notebook as clothes is to	skirt	closet	0.16	0	0	{'closet': 0.16, 'clothes': 0.07, 'wardrobe': 0.07, '______': 0.05, 'what': 0.04}	370	9.72748e-05	0.160059	0.996313	original		0.04	FALSE	FALSE	FALSE	out-of-context	{}
Semantic Relations	animal_shelter	cockroach is to nest as wasp is to	nest	hive	0.16	0	0	{'hive': 0.16, 'swarm': 0.05, '______': 0.05, 'colony': 0.05, '__': 0.05}	5	0.0390625	0.125	0.99995	original		0.04	FALSE	FALSE	FALSE	out-of-context	{}
Morphological Modifiers	over+adj_reg	grown is to overgrown as shadowed is to	overshadowed	?	0.14	0	0	{'?': 0.05, ':': 0.08, '': 0.06, '______': 0.05}	21	0.00759888	0.135956	0.999791	original		0.04	FALSE	FALSE	FALSE	out-of-context	{}
Semantic Relations	animal_shelter	hamster is to nest as wasp is to	nest	hive	0.14	0	0	{'hive': 0.14, 'sting': 0.1, 'build': 0.08, 'swarm': 0.05, '__': 0.05}	9	0.0235596	0.116089	0.99991	original		0.04	FALSE	FALSE	FALSE	out-of-context	{}
Semantic Hierarchies	hypernyms_animals	raptor is to eagle as snake is to	rattlesnake	______	0.12	0	0	{'______': 0.12, '_____': 0.05, '____': 0.04, '': 0.04, ':': 0.03}	28	0.00662231	0.111053	0.999721	original		0.04	FALSE	FALSE	FALSE	out-of-context	{}
Verbal & Grammatical Forms	plural	onions is to onion as birds is to	bird	______	0.12	0	0	{'______': 0.12, '?': 0.06, 'what': 0.05, '': 0.04, '_____': 0.04}	17	0.0153198	0.104797	0.999831	original		0.04	FALSE	FALSE	FALSE	out-of-context	{}
Morphological Modifiers	adj_comparative	sunny is to sunnier as tiny is to	tinier	?	0.1	0	0	{'?': 0.1, '"': 0.06, '': 0.04}	180	0.000299454	0.0949154	0.998206	original		0.04	FALSE	FALSE	FALSE	out-of-context	{}
Morphological Modifiers	over+adj_reg	crowded is to overcrowded as shadowed is to	overshadowed	:	0.1	0	0	{':': 0.06, '': 0.06, '______': 0.06}	92	0.000835419	0.101704	0.999083	original		0.04	FALSE	FALSE	FALSE	out-of-context	{}
Semantic Relations	animal_shelter	cockroach is to nest as snake is to	nest	_____	0.09	0	0	{'_____': 0.09, '______': 0.06, '__': 0.04, ':': 0.04, '': 0.04}	15	0.0119019	0.0764771	0.999851	original		0.04	FALSE	FALSE	FALSE	related	{}
Factual Knowledge	name_occupation	plato is to philosopher as spinoza is to	philosopher	what	0.08	0	0	{'what': 0.08, '?': 0.07, ':': 0.04, '': 0.05}	7	0.0319824	0.0446777	0.99993	original		0.04	FALSE	FALSE	FALSE	out-of-context	{}
Morphological Modifiers	over+adj_reg	optimistic is to overoptimistic as shadowed is to	overshadowed	?	0.08	0	0	{'?': 0.08, 'what': 0.07, ':': 0.07, '': 0.06, '______': 0.06}	37	0.00442505	0.079071	0.999631	original		0.04	FALSE	FALSE	FALSE	out-of-context	{}
Semantic Hierarchies	hypernyms_animals	gibbon is to primate as orangutan is to	primate		0.08	0	0	{'': 0.05, 'what': 0.06, ':': 0.06, 'ape': 0.05}	12	0.0177002	0.0643311	0.99988	original		0.04	FALSE	FALSE	FALSE	out-of-context	{}
Semantic Hierarchies	hypernyms_animals	primate is to gorilla as dinosaur is to	velociraptor	what	0.07	0	0	{'what': 0.07, 'dinosaur': 0.07, '______': 0.06, 'tyr': 0.05, 'p': 0.04}	8	0.0219727	0.0458984	0.99992	original		0.04	FALSE	FALSE	FALSE	out-of-context	{}
Morphological Modifiers	over+adj_reg	cooked is to overcooked as shadowed is to	overshadowed	______	0.06	0	0	{'______': 0.06, 'illuminated': 0.05, '': 0.05, '?': 0.05}	82	0.00133514	0.0553055	0.999183	original		0.04	FALSE	FALSE	FALSE	out-of-context	{}
Verbal & Grammatical Forms	verb_Ving_Ved	performed is to performing as taught is to	teaching		0.04	0	0	{'': 0.04, 'be': 0.04, 'taught': 0.04, 'performing': 0.03, 'the': 0.03}	11	0.0144043	0.0300293	0.99989	original		0.04	FALSE	FALSE	FALSE	out-of-context	{}
Semantic Relations	nationality_adjective	Albania is to Albanian as Japan is to	japanese	Japanese	0.82	1	1	{'Japanese': 0.82, '______': 0.03, '__': 0.01, '_____': 0.01, '____': 0.01}	0	0.816406	0	1	original		0.03	FALSE	FALSE	FALSE	out-of-context	{}
Semantic Relations	nationality_adjective	Croatia is to Croatian as Japan is to	japanese	Japanese	0.8	1	1	{'Japanese': 0.8, '______': 0.04, 'Japan': 0.01, 'the': 0.01, '__': 0.01}	0	0.800781	0	1	original		0.03	FALSE	FALSE	FALSE	out-of-context	{}
Semantic Relations	nationality_adjective	Colombia is to Colombian as Japan is to	japanese	Japanese	0.8	1	1	{'Japanese': 0.8, '______': 0.04, '__': 0.02, '____': 0.01, 'what': 0.01}	0	0.804688	0	1	original		0.03	FALSE	FALSE	FALSE	out-of-context	{}
Semantic Relations	nationality_adjective	Slovakian is to Slovakia as German is to	germany	Germany	0.72	1	1	{'Germany': 0.72, 'Austria': 0.07, '______': 0.03, '__': 0.02, 'what': 0.01}	0	0.722656	0	1	original		0.03	FALSE	FALSE	FALSE	out-of-context	{}
Factual Knowledge	capital_world	Abuja is to Nigeria as Antananarivo is to	madagascar	what	0.51	0	1	{'what': 0.51, 'Madagascar': 0.18, '?': 0.05, 'which': 0.05, '__': 0.02}	1	0.182617	0.329102	0.99999	original		0.03	FALSE	FALSE	FALSE	out-of-context	{}
Factual Knowledge	capital_world	Tbilisi is to Georgia as Antananarivo is to	madagascar	Madagascar	0.4	1	1	{'Madagascar': 0.4, 'what': 0.21, '__': 0.03, '?': 0.03, '______': 0.02}	0	0.402344	0	1	original		0.03	FALSE	FALSE	FALSE	out-of-context	{}
Factual Knowledge	capital_world	Vienna is to Austria as Antananarivo is to	madagascar	what	0.32	0	1	{'what': 0.32, '?': 0.1, 'Madagascar': 0.06, 'which': 0.06, '?"': 0.04}	2	0.0612793	0.259033	0.99998	original		0.03	FALSE	FALSE	FALSE	out-of-context	{}
Factual Knowledge	name_nationality	lincoln is to American as truman is to	american	American	0.31	1	1	{'American': 0.31, 'american': 0.11, 'Korean': 0.02, 'America': 0.02, 'miss': 0.02}	0	0.306641	0	1	original		0.03	FALSE	FALSE	FALSE	out-of-context	{}
Factual Knowledge	capital_world	Vilnius is to Lithuania as Antananarivo is to	madagascar	what	0.29	0	1	{'what': 0.29, 'Madagascar': 0.22, '?': 0.06, 'which': 0.05, '__': 0.03}	1	0.223633	0.0634766	0.99999	original		0.03	FALSE	FALSE	FALSE	out-of-context	{}
Factual Knowledge	capital_world	Libreville is to Gabon as Nicosia is to	cyprus		0.28	0	1	{'': 0.28, 'what': 0.19, '?': 0.13, 'Cyprus': 0.08, 'which': 0.05}	3	0.0825195	0.196777	0.99997	original		0.03	FALSE	FALSE	FALSE	out-of-context	{}
Factual Knowledge	capital_world	Tashkent is to Uzbekistan as Antananarivo is to	madagascar	what	0.28	0	1	{'what': 0.28, 'Madagascar': 0.12, 'which': 0.06, '?': 0.04, ':': 0.04}	1	0.118164	0.165039	0.99999	original		0.03	FALSE	FALSE	FALSE	out-of-context	{}
Factual Knowledge	capital_world	Accra is to Ghana as Antananarivo is to	madagascar	what	0.28	0	1	{'what': 0.28, 'Madagascar': 0.18, '?': 0.05, 'which': 0.04, '__': 0.03}	1	0.183594	0.0917969	0.99999	original		0.03	FALSE	FALSE	FALSE	out-of-context	{}
Verbal & Grammatical Forms	verb_inf_Ved	allowed is to allow as announced is to	announce	allow	0.25	0	1	{'allow': 0.25, 'announce': 0.21, 'be': 0.02, 'make': 0.02, 'let': 0.01}	1	0.209961	0.0439453	0.99999	original		0.03	FALSE	FALSE	FALSE	out-of-context	{}
Factual Knowledge	capital_world	Tegucigalpa is to Honduras as Antananarivo is to	madagascar	what	0.23	0	1	{'what': 0.23, 'Madagascar': 0.09, '______': 0.07, '__': 0.06, ':': 0.05}	1	0.0898438	0.139648	0.99999	original		0.03	FALSE	FALSE	FALSE	out-of-context	{}
Factual Knowledge	capital_world	Tirana is to Albania as Antananarivo is to	madagascar	Madagascar	0.22	1	1	{'Madagascar': 0.22, 'what': 0.16, '?': 0.07, '__': 0.04, ':': 0.04}	0	0.21875	0	1	original		0.03	FALSE	FALSE	FALSE	out-of-context	{}
Verbal & Grammatical Forms	plural	pig is to pigs as finger is to	fingers	hands	0.21	0	1	{'hands': 0.21, 'fingers': 0.08, '______': 0.05, '_': 0.04, '"': 0.04}	1	0.0771484	0.131836	0.99999	original		0.03	FALSE	FALSE	FALSE	out-of-context	{}
Verbal & Grammatical Forms	verb_inf_Ved	described is to describe as involved is to	involve	describe	0.2	0	1	{'describe': 0.2, 'involve': 0.1, 'be': 0.04, 'explain': 0.03, 'make': 0.02}	1	0.101562	0.100586	0.99999	original		0.03	FALSE	FALSE	FALSE	out-of-context	{}
Factual Knowledge	capital_world	Doha is to Qatar as Harare is to	zimbabwe	:	0.18	0	1	{':': 0.18, 'what': 0.09, 'Zimbabwe': 0.08, '?': 0.06, 'which': 0.06}	2	0.0805664	0.100098	0.99998	original		0.03	FALSE	FALSE	FALSE	out-of-context	{}
Verbal & Grammatical Forms	plural	donkey is to donkeys as finger is to	fingers	fingers	0.18	1	1	{'fingers': 0.18, '_': 0.06, '': 0.05, 'hands': 0.04, 'what': 0.04}	0	0.18457	0	1	original		0.03	FALSE	FALSE	FALSE	out-of-context	{}
Factual Knowledge	name_occupation	confucius is to philosopher as kant is to	philosopher	philosopher	0.16	1	1	{'philosopher': 0.16, 'what': 0.06, '?': 0.05, '______': 0.03, '': 0.03}	0	0.15625	0	1	original		0.03	FALSE	FALSE	FALSE	out-of-context	{}
Morphological Modifiers	verb+able_reg	definable is to define as protectable is to	protect	define	0.16	0	1	{'define': 0.16, 'protect': 0.07, 'be': 0.02, 'create': 0.02, 'defend': 0.01}	1	0.0703125	0.0878906	0.99999	original		0.03	FALSE	FALSE	FALSE	out-of-context	{}
Verbal & Grammatical Forms	verb_inf_Ved	accepted is to accept as decided is to	decide	accept	0.16	0	1	{'accept': 0.16, 'decide': 0.08, 'agree': 0.07, 'make': 0.03, 'take': 0.03}	1	0.081543	0.0805664	0.99999	original		0.03	FALSE	FALSE	FALSE	out-of-context	{}
Semantic Hierarchies	hypernyms_animals	bee is to insect as butterfly is to	insect	insect	0.15	1	1	{'insect': 0.15, '?': 0.04, 'butterfly': 0.08, ':': 0.04}	0	0.146484	0	1	original		0.03	FALSE	FALSE	FALSE	out-of-context	{}
Verbal & Grammatical Forms	plural	lion is to lions as hand is to	hands	?	0.14	0	1	{'?': 0.06, '': 0.04, 'hands': 0.05}	3	0.0529785	0.0827637	0.99997	original		0.03	FALSE	FALSE	FALSE	out-of-context	{}
Semantic Hierarchies	hypernyms_misc	jewelry is to bracelet as clothes is to	shirt	shirt	0.13	1	1	{'shirt': 0.13, '?': 0.05, '': 0.05, 'what': 0.04, '"': 0.04}	0	0.133789	0	1	original		0.03	FALSE	FALSE	FALSE	out-of-context	{}
Verbal & Grammatical Forms	plural	cat is to cats as finger is to	fingers	hands	0.13	0	1	{'hands': 0.13, 'fingers': 0.12, 'hand': 0.1, 'fing': 0.06, '______': 0.06}	1	0.119141	0.015625	0.99999	original		0.03	FALSE	FALSE	FALSE	out-of-context	{}
Factual Knowledge	country_language	Kuwait is to Arabic as Syria is to	arabic	Arabic	0.12	1	1	{'Arabic': 0.12, 'what': 0.06, ':': 0.06, '_': 0.04, '______': 0.04}	0	0.120117	0	1	original		0.03	FALSE	FALSE	FALSE	out-of-context	{}
Verbal & Grammatical Forms	plural	elephants is to elephant as birds is to	bird	______	0.12	0	1	{'______': 0.12, 'what': 0.05, '____': 0.04, 'bird': 0.04, '': 0.04}	3	0.0405273	0.0839844	0.99997	original		0.03	FALSE	FALSE	FALSE	out-of-context	{}
Verbal & Grammatical Forms	verb_inf_Ved	announced is to announce as decided is to	decide	decide	0.12	1	1	{'decide': 0.12, 'announce': 0.08, 'make': 0.06, 'be': 0.04, 'declare': 0.02}	0	0.115723	0	1	original		0.03	FALSE	FALSE	FALSE	out-of-context	{}
Semantic Hierarchies	hypernyms_animals	feline is to leopard as canine is to	wolf	wolf	0.11	1	1	{'wolf': 0.11, 'dog': 0.08, '"': 0.06, '______': 0.05, '____': 0.05}	0	0.109863	0	1	original		0.03	FALSE	FALSE	FALSE	out-of-context	{}
Semantic Hierarchies	hypernyms_animals	dog is to canine as wolf is to	canine	canine	0.1	1	1	{'canine': 0.1, '______': 0.06, '"': 0.05, 'mamm': 0.05, '____': 0.04}	0	0.0981445	0	1	original		0.03	FALSE	FALSE	FALSE	related	{}
Morphological Modifiers	adj+ness_reg	awareness is to aware as innovativeness is to	innovative		0.08	0	1	{'': 0.05, 'innovate': 0.07, 'innovative': 0.07, '______': 0.05}	2	0.0668945	0.00878906	0.99998	original		0.03	FALSE	FALSE	FALSE	out-of-context	{}
Verbal & Grammatical Forms	plural	rat is to rats as hand is to	hands	?	0.08	0	1	{'?': 0.08, 'hands': 0.05, '': 0.04, 'hand': 0.04, 'a': 0.04}	1	0.0539551	0.0241699	0.99999	original		0.03	FALSE	FALSE	FALSE	out-of-context	{}
Semantic Hierarchies	hyponyms_misc	limousine is to car as diamond is to	jewel	gem	0.07	0	1	{'gem': 0.07, 'jewel': 0.06, '': 0.06, '?': 0.05, ':': 0.05}	2	0.0615234	0.00830078	0.99998	original		0.03	FALSE	FALSE	FALSE	out-of-context	{}
Verbal & Grammatical Forms	plural	goat is to goats as hand is to	hands	______	0.07	0	1	{'______': 0.07, 'hand': 0.06, '____': 0.05, 'hands': 0.04, '_': 0.04}	3	0.0378418	0.0285645	0.99997	original		0.03	FALSE	FALSE	FALSE	out-of-context	{}
Factual Knowledge	name_nationality	aristotle is to Greek as plato is to	greek		0.06	0	1	{'': 0.06, 'roman': 0.06, 'g': 0.05, 'Greek': 0.04, '______': 0.04}	3	0.0427246	0.015625	0.99997	original		0.03	FALSE	FALSE	FALSE	out-of-context	{}
Verbal & Grammatical Forms	verb_Ving_3pSg	performing is to performs as sitting is to	sits	sitting	0.31	0	0.5	{'sitting': 0.31, 'sit': 0.18, 'standing': 0.04, 'performing': 0.03, 'be': 0.03}	8	0.0113525	0.301147	0.99992	original		0.03	FALSE	FALSE	FALSE	out-of-context	{}
Verbal & Grammatical Forms	past_tense	hitting is to hit as moving is to	moved	move	0.18	0.5	0.5	{'move': 0.18, 'walk': 0.17, 'run': 0.1, 'go': 0.08, 'walking': 0.05}	309	0.000118732	0.183475	0.996921	original		0.03	FALSE	FALSE	FALSE	out-of-context	{}
Verbal & Grammatical Forms	adjective_to_adverb	calmly is to calm as cheerfully is to	cheerful	cheer	0.15	0.5	0.5	{'cheer': 0.15, '': 0.09, '______': 0.06, '__': 0.04}	112	0.000587463	0.151756	0.998884	original		0.03	FALSE	FALSE	FALSE	out-of-context	{}
Factual Knowledge	UK_city_county	oxford is to oxfordshire as stirling is to	stirlingshire	stir	0.12	0.5	0.5	{'stir': 0.12, '?': 0.04, 'what': 0.09, '': 0.04}	0	0.119141	0	1	original		0.03	FALSE	FALSE	FALSE	out-of-context	{}
Semantic Hierarchies	hypernyms_animals	gorilla is to primate as squirrel is to	rodent	:	0.08	0	0.5	{':': 0.08, '': 0.07, 'what': 0.05, 'rod': 0.05, '?': 0.05}	4	0.0454102	0.0341797	0.99996	original		0.03	FALSE	FALSE	FALSE	out-of-context	{}
Mathematics	math_division5	20 is to 4 as 80 is to	16	x	0.82	0	0	{'x': 0.82, 'y': 0.08, 'what': 0.03, '': 0.02, 'X': 0.01}	548	1.65775e-07	0.824219	0.994539	original		0.03	FALSE	FALSE	FALSE	out-of-context	{}
Mathematics	math_division5	20 is to 4 as 70 is to	14	x	0.81	0	0	{'x': 0.81, 'y': 0.08, 'what': 0.03, '': 0.03, 'X': 0.02}	1178	7.40401e-08	0.808594	0.988261	original		0.03	FALSE	FALSE	FALSE	out-of-context	{}
Mathematics	math_double	60 is to 120 as 8 is to	16	x	0.8	0	0	{'x': 0.8, 'y': 0.06, 'what': 0.06, '': 0.05, 'X': 0.01}	243	5.7742e-07	0.796874	0.997579	original		0.03	FALSE	FALSE	FALSE	out-of-context	{}
Mathematics	math_division5	25 is to 5 as 80 is to	16	x	0.77	0	0	{'x': 0.77, 'y': 0.08, 'what': 0.05, '': 0.04, '\\(': 0.02}	794	1.72295e-07	0.765625	0.992088	original		0.03	FALSE	FALSE	FALSE	out-of-context	{}
Mathematics	math_double	52 is to 104 as 8 is to	16	x	0.76	0	0	{'x': 0.76, 'what': 0.09, '': 0.08, 'y': 0.03, 'X': 0.02}	130	5.45382e-06	0.757807	0.998705	original		0.03	FALSE	FALSE	FALSE	out-of-context	{}
Mathematics	math_division5	25 is to 5 as 70 is to	14	x	0.76	0	0	{'x': 0.76, 'y': 0.07, 'what': 0.06, '': 0.05, '\\(': 0.02}	1153	1.15018e-07	0.757812	0.98851	original		0.03	FALSE	FALSE	FALSE	out-of-context	{}
Mathematics	math_division5	35 is to 7 as 80 is to	16	x	0.76	0	0	{'x': 0.76, 'y': 0.13, 'what': 0.03, '': 0.02, '\\(': 0.02}	776	1.546e-07	0.757812	0.992267	original		0.03	FALSE	FALSE	FALSE	out-of-context	{}
Mathematics	math_squares	30 is to 900 as 4 is to	16	x	0.75	0	0	{'x': 0.75, '': 0.08, 'what': 0.07, 'y': 0.04, 'X': 0.02}	699	2.07685e-07	0.746094	0.993035	original		0.03	FALSE	FALSE	FALSE	out-of-context	{}
Mathematics	math_division5	40 is to 8 as 80 is to	16	x	0.75	0	0	{'x': 0.75, 'y': 0.14, 'what': 0.04, '': 0.03, '\\(': 0.01}	511	2.84985e-07	0.746093	0.994908	original		0.03	FALSE	FALSE	FALSE	out-of-context	{}
Mathematics	math_division5	100 is to 20 as 80 is to	16	x	0.75	0	0	{'x': 0.75, 'y': 0.09, 'what': 0.07, 'X': 0.04, '\\(': 0.02}	1580	5.61122e-08	0.753906	0.984255	original		0.03	FALSE	FALSE	FALSE	out-of-context	{}
Mathematics	math_double	35 is to 70 as 8 is to	16	x	0.74	0	0	{'x': 0.74, '': 0.12, 'y': 0.05, 'what': 0.05, '\\(': 0.01}	340	6.85453e-07	0.738281	0.996612	original		0.03	FALSE	FALSE	FALSE	out-of-context	{}
Mathematics	math_division5	35 is to 7 as 70 is to	14	x	0.74	0	0	{'x': 0.74, 'y': 0.11, 'what': 0.06, '': 0.03, '\\(': 0.02}	1137	1.13156e-07	0.738281	0.98867	original		0.03	FALSE	FALSE	FALSE	out-of-context	{}
Mathematics	math_division5	50 is to 10 as 80 is to	16	x	0.73	0	0	{'x': 0.73, 'y': 0.1, 'what': 0.05, '': 0.05, 'X': 0.02}	779	1.69501e-07	0.730469	0.992237	original		0.03	FALSE	FALSE	FALSE	out-of-context	{}
Mathematics	math_double	75 is to 150 as 65 is to	130	x	0.72	0	0	{'x': 0.72, 'what': 0.07, 'y': 0.06, 'X': 0.05, '': 0.05}	2191	2.91038e-08	0.722656	0.978167	original		0.03	FALSE	FALSE	FALSE	out-of-context	{}
Mathematics	math_double	70 is to 140 as 8 is to	16	x	0.72	0	0	{'x': 0.72, '': 0.14, 'what': 0.06, 'y': 0.03, 'X': 0.02}	315	6.81728e-07	0.722656	0.996861	original		0.03	FALSE	FALSE	FALSE	out-of-context	{}
Mathematics	math_division2	14 is to 7 as 76 is to	38	x	0.71	0	0	{'x': 0.71, 'y': 0.11, 'what': 0.06, '': 0.04, 'X': 0.03}	11658	4.83124e-09	0.707031	0.883829	original		0.03	FALSE	FALSE	FALSE	out-of-context	{}
Mathematics	math_division5	40 is to 8 as 70 is to	14	x	0.71	0	0	{'x': 0.71, 'y': 0.16, 'what': 0.05, '': 0.03, '\\(': 0.01}	1146	9.54606e-08	0.707031	0.98858	original		0.03	FALSE	FALSE	FALSE	out-of-context	{}
Mathematics	math_division2	100 is to 50 as 32 is to	16	x	0.71	0	0	{'x': 0.71, 'y': 0.09, 'what': 0.07, '': 0.04, 'X': 0.03}	931	1.65775e-07	0.714844	0.990723	original		0.03	FALSE	FALSE	FALSE	out-of-context	{}
Mathematics	math_division2	100 is to 50 as 62 is to	31	x	0.71	0	0	{'x': 0.71, 'y': 0.07, 'what': 0.07, '': 0.05, 'X': 0.04}	9862	3.8126e-09	0.710937	0.901726	original		0.03	FALSE	FALSE	FALSE	out-of-context	{}
Mathematics	math_double	100 is to 200 as 65 is to	130	x	0.7	0	0	{'x': 0.7, 'X': 0.08, 'what': 0.06, '': 0.06, 'y': 0.06}	2509	1.9907e-08	0.703125	0.974998	original		0.03	FALSE	FALSE	FALSE	out-of-context	{}
Mathematics	math_double	62 is to 124 as 8 is to	16	x	0.7	0	0	{'x': 0.7, 'what': 0.12, '': 0.09, 'y': 0.04, 'X': 0.02}	146	4.82798e-06	0.695308	0.998545	original		0.03	FALSE	FALSE	FALSE	out-of-context	{}
Mathematics	math_double	75 is to 150 as 74 is to	148	x	0.7	0	0	{'x': 0.7, 'what': 0.1, 'y': 0.06, '': 0.05, 'X': 0.04}	9972	3.72529e-09	0.699219	0.90063	original		0.03	FALSE	FALSE	FALSE	out-of-context	{}
Mathematics	math_double	75 is to 150 as 98 is to	196	x	0.7	0	0	{'x': 0.7, 'what': 0.11, 'y': 0.06, '': 0.04, 'X': 0.03}	12513	1.52795e-09	0.703125	0.875309	original		0.03	FALSE	FALSE	FALSE	out-of-context	{}
Mathematics	math_double	72 is to 144 as 8 is to	16	x	0.7	0	0	{'x': 0.7, 'what': 0.11, '': 0.09, 'y': 0.04, 'the': 0.01}	240	1.51247e-06	0.703123	0.997608	original		0.03	FALSE	FALSE	FALSE	out-of-context	{}
Mathematics	math_division2	34 is to 17 as 94 is to	47	x	0.7	0	0	{'x': 0.7, 'y': 0.12, '': 0.06, 'what': 0.05, 'X': 0.02}	2594	3.88827e-08	0.695312	0.974151	original		0.03	FALSE	FALSE	FALSE	out-of-context	{}
Mathematics	math_division2	50 is to 25 as 94 is to	47	x	0.7	0	0	{'x': 0.7, '': 0.08, 'y': 0.08, 'what': 0.06, 'X': 0.03}	4193	1.64146e-08	0.695312	0.958217	original		0.03	FALSE	FALSE	FALSE	out-of-context	{}
Mathematics	math_division2	14 is to 7 as 94 is to	47	x	0.7	0	0	{'x': 0.7, 'y': 0.11, 'what': 0.06, '': 0.05, 'X': 0.03}	6240	1.40863e-08	0.695312	0.937819	original		0.03	FALSE	FALSE	FALSE	out-of-context	{}
Mathematics	math_division2	100 is to 50 as 28 is to	14	x	0.7	0	0	{'x': 0.7, 'y': 0.08, 'what': 0.07, '': 0.06, 'X': 0.04}	2268	4.51691e-08	0.695312	0.9774	original		0.03	FALSE	FALSE	FALSE	out-of-context	{}
Mathematics	math_division5	70 is to 14 as 80 is to	16	x	0.7	0	0	{'x': 0.7, 'y': 0.11, 'what': 0.07, '': 0.05, '\\(': 0.02}	407	5.02914e-07	0.699218	0.995944	original		0.03	FALSE	FALSE	FALSE	out-of-context	{}
Mathematics	math_division5	60 is to 12 as 70 is to	14	x	0.7	0	0	{'x': 0.7, 'y': 0.13, 'what': 0.05, '': 0.04, 'X': 0.02}	1056	1.21072e-07	0.703125	0.989477	original		0.03	FALSE	FALSE	FALSE	out-of-context	{}
Mathematics	math_double	38 is to 76 as 8 is to	16	x	0.69	0	0	{'x': 0.69, 'what': 0.11, '': 0.09, 'y': 0.05, 'X': 0.02}	198	2.92063e-06	0.691403	0.998027	original		0.03	FALSE	FALSE	FALSE	out-of-context	{}
Mathematics	math_double	75 is to 150 as 84 is to	168	x	0.69	0	0	{'x': 0.69, 'what': 0.12, 'y': 0.07, '': 0.04, 'X': 0.03}	14241	1.38971e-09	0.691406	0.85809	original		0.03	FALSE	FALSE	FALSE	out-of-context	{}
Mathematics	math_double	70 is to 140 as 65 is to	130	x	0.69	0	0	{'x': 0.69, '': 0.09, 'y': 0.08, 'what': 0.06, 'X': 0.03}	1393	8.00937e-08	0.6875	0.986119	original		0.03	FALSE	FALSE	FALSE	out-of-context	{}
Mathematics	math_division2	24 is to 12 as 64 is to	32	x	0.69	0	0	{'x': 0.69, 'y': 0.12, 'what': 0.09, '': 0.03, '\\(': 0.02}	5875	1.22818e-08	0.691406	0.941456	original		0.03	FALSE	FALSE	FALSE	out-of-context	{}
Mathematics	math_division2	28 is to 14 as 94 is to	47	x	0.69	0	0	{'x': 0.69, 'y': 0.1, 'what': 0.07, '': 0.07, 'X': 0.04}	4297	2.28174e-08	0.6875	0.957181	original		0.03	FALSE	FALSE	FALSE	out-of-context	{}
Mathematics	math_division2	28 is to 14 as 64 is to	32	x	0.69	0	0	{'x': 0.69, 'y': 0.13, 'what': 0.07, '': 0.03, 'X': 0.03}	5194	1.59489e-08	0.6875	0.948242	original		0.03	FALSE	FALSE	FALSE	out-of-context	{}
Mathematics	math_division2	40 is to 20 as 94 is to	47	x	0.69	0	0	{'x': 0.69, 'y': 0.1, '': 0.08, 'what': 0.06, 'X': 0.03}	3654	1.851e-08	0.691406	0.963588	original		0.03	FALSE	FALSE	FALSE	out-of-context	{}
Mathematics	math_division2	14 is to 7 as 64 is to	32	x	0.69	0	0	{'x': 0.69, 'y': 0.14, 'what': 0.05, '': 0.02, 'X': 0.02}	8172	1.16415e-08	0.6875	0.918567	original		0.03	FALSE	FALSE	FALSE	out-of-context	{}
Mathematics	math_division2	8 is to 4 as 32 is to	16	x	0.69	0	0	{'x': 0.69, 'y': 0.14, 'what': 0.06, 'X': 0.03, '': 0.03}	445	5.69969e-07	0.687499	0.995566	original		0.03	FALSE	FALSE	FALSE	out-of-context	{}
Mathematics	math_division2	14 is to 7 as 32 is to	16	x	0.69	0	0	{'x': 0.69, 'y': 0.14, 'what': 0.05, 'X': 0.02, '': 0.02}	742	2.64496e-07	0.691406	0.992606	original		0.03	FALSE	FALSE	FALSE	out-of-context	{}
Mathematics	math_division5	80 is to 16 as 70 is to	14	x	0.69	0	0	{'x': 0.69, 'what': 0.09, 'y': 0.07, '': 0.06, 'X': 0.03}	1122	1.30385e-07	0.691406	0.988819	original		0.03	FALSE	FALSE	FALSE	out-of-context	{}
Mathematics	math_division2	90 is to 45 as 94 is to	47	x	0.69	0	0	{'x': 0.69, 'y': 0.13, 'what': 0.06, '': 0.05, '\\(': 0.02}	2660	3.21306e-08	0.6875	0.973493	original		0.03	FALSE	FALSE	FALSE	out-of-context	{}
Mathematics	math_double	36 is to 72 as 8 is to	16	x	0.68	0	0	{'x': 0.68, 'what': 0.13, '': 0.08, 'y': 0.06, '\\(': 0.01}	216	1.66148e-06	0.679686	0.997848	original		0.03	FALSE	FALSE	FALSE	out-of-context	{}
Mathematics	math_double	26 is to 52 as 8 is to	16	x	0.68	0	0	{'x': 0.68, 'what': 0.12, '': 0.08, 'y': 0.06, 'X': 0.02}	143	8.16584e-06	0.679679	0.998575	original		0.03	FALSE	FALSE	FALSE	out-of-context	{}
Mathematics	math_division2	40 is to 20 as 64 is to	32	x	0.68	0	0	{'x': 0.68, 'y': 0.15, 'what': 0.05, '': 0.04, 'X': 0.02}	3817	2.24682e-08	0.683594	0.961964	original		0.03	FALSE	FALSE	FALSE	out-of-context	{}
Mathematics	math_squares	15 is to 225 as 4 is to	16	x	0.68	0	0	{'x': 0.68, '': 0.15, 'what': 0.07, 'y': 0.03, 'X': 0.02}	764	2.14204e-07	0.679687	0.992387	original		0.03	FALSE	FALSE	FALSE	out-of-context	{}
Mathematics	math_double	20 is to 40 as 8 is to	16	x	0.67	0	0	{'x': 0.67, 'what': 0.11, '': 0.09, 'y': 0.08, 'X': 0.01}	153	3.59118e-06	0.671871	0.998475	original		0.03	FALSE	FALSE	FALSE	out-of-context	{}
Mathematics	math_double	100 is to 200 as 8 is to	16	x	0.67	0	0	{'x': 0.67, 'what': 0.14, '': 0.09, 'y': 0.04, 'X': 0.03}	384	4.71249e-07	0.667968	0.996173	original		0.03	FALSE	FALSE	FALSE	out-of-context	{}
Mathematics	math_double	70 is to 140 as 74 is to	148	x	0.67	0	0	{'x': 0.67, 'what': 0.1, 'y': 0.09, '': 0.08, 'X': 0.02}	6409	7.01402e-09	0.671875	0.936135	original		0.03	FALSE	FALSE	FALSE	out-of-context	{}
Mathematics	math_squares	20 is to 400 as 4 is to	16	x	0.67	0	0	{'x': 0.67, '': 0.14, 'what': 0.06, 'X': 0.05, 'y': 0.03}	736	3.76254e-07	0.667968	0.992666	original		0.03	FALSE	FALSE	FALSE	out-of-context	{}
Mathematics	math_double	90 is to 180 as 8 is to	16	x	0.66	0	0	{'x': 0.66, 'what': 0.11, '': 0.1, 'y': 0.06, 'X': 0.02}	373	7.37607e-07	0.660156	0.996283	original		0.03	FALSE	FALSE	FALSE	out-of-context	{}
Mathematics	math_double	100 is to 200 as 30 is to	60	x	0.66	0	0	{'x': 0.66, 'what': 0.1, 'X': 0.08, 'y': 0.07, '': 0.04}	1073	6.75209e-08	0.65625	0.989308	original		0.03	FALSE	FALSE	FALSE	out-of-context	{}
Mathematics	math_double	90 is to 180 as 65 is to	130	x	0.66	0	0	{'x': 0.66, 'y': 0.1, 'what': 0.07, '': 0.07, 'X': 0.04}	1707	5.68107e-08	0.664062	0.98299	original		0.03	FALSE	FALSE	FALSE	out-of-context	{}
Mathematics	math_division2	30 is to 15 as 32 is to	16	x	0.66	0	0	{'x': 0.66, 'y': 0.14, 'what': 0.08, '': 0.05, 'X': 0.03}	496	3.70666e-07	0.65625	0.995057	original		0.03	FALSE	FALSE	FALSE	out-of-context	{}
Mathematics	math_division2	28 is to 14 as 62 is to	31	x	0.66	0	0	{'x': 0.66, 'y': 0.11, 'what': 0.08, '': 0.06, 'X': 0.04}	7172	1.00699e-08	0.65625	0.928532	original		0.03	FALSE	FALSE	FALSE	out-of-context	{}
Mathematics	math_division2	20 is to 10 as 94 is to	47	x	0.66	0	0	{'x': 0.66, '': 0.1, 'what': 0.09, 'y': 0.08, 'X': 0.02}	4812	1.66474e-08	0.664062	0.952049	original		0.03	FALSE	FALSE	FALSE	out-of-context	{}
Mathematics	math_division2	80 is to 40 as 94 is to	47	x	0.66	0	0	{'x': 0.66, 'y': 0.12, '': 0.09, 'what': 0.05, 'X': 0.03}	3441	2.11876e-08	0.664062	0.965711	original		0.03	FALSE	FALSE	FALSE	out-of-context	{}
Mathematics	math_double	34 is to 68 as 8 is to	16	x	0.65	0	0	{'x': 0.65, 'y': 0.17, 'what': 0.06, '': 0.04, '\\(': 0.02}	236	3.54648e-06	0.65234	0.997648	original		0.03	FALSE	FALSE	FALSE	out-of-context	{}
Mathematics	math_division2	24 is to 12 as 62 is to	31	x	0.65	0	0	{'x': 0.65, 'what': 0.11, 'y': 0.09, '': 0.07, 'X': 0.02}	8202	5.76256e-09	0.652344	0.918268	original		0.03	FALSE	FALSE	FALSE	out-of-context	{}
Mathematics	math_division2	50 is to 25 as 64 is to	32	x	0.65	0	0	{'x': 0.65, 'y': 0.12, 'what': 0.07, '': 0.05, 'X': 0.03}	5782	1.67638e-08	0.652344	0.942383	original		0.03	FALSE	FALSE	FALSE	out-of-context	{}
Mathematics	math_division2	40 is to 20 as 62 is to	31	x	0.65	0	0	{'x': 0.65, 'y': 0.12, '': 0.09, 'what': 0.07, 'X': 0.03}	6558	7.74162e-09	0.652344	0.93465	original		0.03	FALSE	FALSE	FALSE	out-of-context	{}
Mathematics	math_squares	12 is to 144 as 4 is to	16	x	0.65	0	0	{'x': 0.65, 'what': 0.11, '': 0.09, 'y': 0.08, 'the': 0.02}	584	4.26546e-07	0.648437	0.99418	original		0.03	FALSE	FALSE	FALSE	out-of-context	{}
Mathematics	math_division2	20 is to 10 as 62 is to	31	x	0.65	0	0	{'x': 0.65, 'y': 0.1, 'what': 0.1, '': 0.08, 'X': 0.03}	7857	7.30506e-09	0.652344	0.921706	original		0.03	FALSE	FALSE	FALSE	out-of-context	{}
Mathematics	math_division2	6 is to 3 as 32 is to	16	x	0.65	0	0	{'x': 0.65, 'y': 0.15, 'what': 0.09, '': 0.03, 'X': 0.03}	604	3.72529e-07	0.652343	0.993981	original		0.03	FALSE	FALSE	FALSE	out-of-context	{}
Mathematics	math_division2	14 is to 7 as 28 is to	14	x	0.65	0	0	{'x': 0.65, 'y': 0.16, 'what': 0.07, 'X': 0.03, '': 0.03}	1489	1.11759e-07	0.652344	0.985162	original		0.03	FALSE	FALSE	FALSE	out-of-context	{}
Mathematics	math_division2	10 is to 5 as 32 is to	16	x	0.65	0	0	{'x': 0.65, 'y': 0.16, 'what': 0.08, '': 0.04, 'X': 0.03}	502	5.06639e-07	0.648437	0.994998	original		0.03	FALSE	FALSE	FALSE	out-of-context	{}
Mathematics	math_division5	45 is to 9 as 80 is to	16	x	0.65	0	0	{'x': 0.65, 'y': 0.14, '': 0.08, 'what': 0.05, '\\(': 0.03}	450	4.35859e-07	0.648437	0.995516	original		0.03	FALSE	FALSE	FALSE	out-of-context	{}
Mathematics	math_division5	45 is to 9 as 70 is to	14	x	0.65	0	0	{'x': 0.65, 'y': 0.12, '': 0.1, 'what': 0.05, '\\(': 0.03}	941	1.72295e-07	0.648437	0.990623	original		0.03	FALSE	FALSE	FALSE	out-of-context	{}
Mathematics	math_division5	90 is to 18 as 80 is to	16	x	0.65	0	0	{'x': 0.65, 'y': 0.11, 'what': 0.08, '': 0.06, 'X': 0.03}	719	2.77534e-07	0.652343	0.992835	original		0.03	FALSE	FALSE	FALSE	out-of-context	{}
Mathematics	math_double	50 is to 100 as 65 is to	130	x	0.64	0	0	{'x': 0.64, 'y': 0.1, '': 0.07, 'what': 0.06, 'X': 0.06}	1649	6.14673e-08	0.636719	0.983568	original		0.03	FALSE	FALSE	FALSE	out-of-context	{}
Mathematics	math_double	6 is to 12 as 98 is to	196	x	0.64	0	0	{'x': 0.64, 'y': 0.11, 'what': 0.07, '': 0.07, 'X': 0.05}	12558	3.87081e-09	0.640625	0.87486	original		0.03	FALSE	FALSE	FALSE	out-of-context	{}
Mathematics	math_double	24 is to 48 as 8 is to	16	x	0.64	0	0	{'x': 0.64, 'what': 0.16, 'y': 0.07, '': 0.07, '\\(': 0.01}	156	3.71039e-06	0.644528	0.998445	original		0.03	FALSE	FALSE	FALSE	out-of-context	{}
Mathematics	math_double	60 is to 120 as 16 is to	32	x	0.64	0	0	{'x': 0.64, '': 0.12, 'y': 0.1, 'what': 0.06, 'X': 0.04}	3215	1.87429e-08	0.644531	0.967963	original		0.03	FALSE	FALSE	FALSE	out-of-context	{}
Mathematics	math_double	58 is to 116 as 8 is to	16	x	0.64	0	0	{'x': 0.64, 'what': 0.15, '': 0.12, 'y': 0.03, 'X': 0.02}	209	2.41399e-06	0.636716	0.997917	original		0.03	FALSE	FALSE	FALSE	out-of-context	{}
Mathematics	math_double	70 is to 140 as 28 is to	56	x	0.64	0	0	{'x': 0.64, '': 0.12, 'what': 0.09, 'y': 0.06, 'X': 0.04}	2587	3.14321e-08	0.644531	0.974221	original		0.03	FALSE	FALSE	FALSE	out-of-context	{}
Mathematics	math_division2	22 is to 11 as 94 is to	47	x	0.64	0	0	{'x': 0.64, 'y': 0.13, 'what': 0.08, '': 0.06, '\\(': 0.02}	4348	2.75904e-08	0.636719	0.956673	original		0.03	FALSE	FALSE	FALSE	out-of-context	{}
Mathematics	math_division2	50 is to 25 as 62 is to	31	x	0.64	0	0	{'x': 0.64, 'y': 0.1, 'what': 0.07, '': 0.07, 'X': 0.04}	7885	6.60657e-09	0.644531	0.921427	original		0.03	FALSE	FALSE	FALSE	out-of-context	{}
Mathematics	math_squares	24 is to 576 as 4 is to	16	x	0.64	0	0	{'x': 0.64, '': 0.15, 'what': 0.09, 'X': 0.04, 'y': 0.03}	656	5.99772e-07	0.636718	0.993463	original		0.03	FALSE	FALSE	FALSE	out-of-context	{}
Mathematics	math_division2	20 is to 10 as 32 is to	16	x	0.64	0	0	{'x': 0.64, 'y': 0.15, 'what': 0.1, '': 0.05, 'X': 0.02}	362	6.63102e-07	0.636718	0.996393	original		0.03	FALSE	FALSE	FALSE	out-of-context	{}
Mathematics	math_division2	10 is to 5 as 62 is to	31	x	0.64	0	0	{'x': 0.64, 'y': 0.13, 'what': 0.07, '': 0.06, 'X': 0.03}	8875	8.61473e-09	0.640625	0.911561	original		0.03	FALSE	FALSE	FALSE	out-of-context	{}
Mathematics	math_division2	10 is to 5 as 94 is to	47	x	0.64	0	0	{'x': 0.64, 'y': 0.13, '': 0.08, 'what': 0.07, 'X': 0.03}	7124	1.30385e-08	0.636719	0.92901	original		0.03	FALSE	FALSE	FALSE	out-of-context	{}
Mathematics	math_division2	70 is to 35 as 64 is to	32	x	0.64	0	0	{'x': 0.64, 'y': 0.15, 'what': 0.06, '': 0.05, '\\(': 0.02}	6317	1.93249e-08	0.636719	0.937052	original		0.03	FALSE	FALSE	FALSE	out-of-context	{}
Mathematics	math_double	40 is to 80 as 65 is to	130	x	0.63	0	0	{'x': 0.63, 'y': 0.12, '': 0.1, 'X': 0.05, 'what': 0.04}	1014	1.21072e-07	0.632812	0.989896	original		0.03	FALSE	FALSE	FALSE	out-of-context	{}
Mathematics	math_double	100 is to 200 as 74 is to	148	x	0.63	0	0	{'x': 0.63, 'what': 0.1, '': 0.08, 'X': 0.08, 'y': 0.05}	10362	2.79397e-09	0.632812	0.896743	original		0.03	FALSE	FALSE	FALSE	out-of-context	{}
Mathematics	math_division2	34 is to 17 as 64 is to	32	x	0.63	0	0	{'x': 0.63, 'y': 0.18, 'what': 0.05, '': 0.04, '\\(': 0.03}	4774	2.06055e-08	0.628906	0.952427	original		0.03	FALSE	FALSE	FALSE	out-of-context	{}
Mathematics	math_division2	4 is to 2 as 32 is to	16	x	0.63	0	0	{'x': 0.63, 'y': 0.13, 'what': 0.09, '': 0.05, 'X': 0.05}	512	7.22706e-07	0.632812	0.994898	original		0.03	FALSE	FALSE	FALSE	out-of-context	{}
Mathematics	math_division2	8 is to 4 as 94 is to	47	x	0.63	0	0	{'x': 0.63, 'y': 0.12, '': 0.09, 'what': 0.07, 'X': 0.03}	5358	2.21189e-08	0.632812	0.946608	original		0.03	FALSE	FALSE	FALSE	out-of-context	{}
Mathematics	math_division2	6 is to 3 as 94 is to	47	x	0.63	0	0	{'x': 0.63, 'y': 0.12, '': 0.09, 'what': 0.08, 'X': 0.03}	5831	2.11876e-08	0.628906	0.941895	original		0.03	FALSE	FALSE	FALSE	out-of-context	{}
Mathematics	math_division2	12 is to 6 as 94 is to	47	x	0.63	0	0	{'x': 0.63, 'y': 0.12, '': 0.12, 'what': 0.06, 'X': 0.02}	4266	2.20025e-08	0.628906	0.95749	original		0.03	FALSE	FALSE	FALSE	out-of-context	{}
Mathematics	math_division2	70 is to 35 as 62 is to	31	x	0.63	0	0	{'x': 0.63, 'y': 0.13, '': 0.07, 'what': 0.06, '\\(': 0.03}	8421	8.14907e-09	0.632812	0.916085	original		0.03	FALSE	FALSE	FALSE	out-of-context	{}
Mathematics	math_double	35 is to 70 as 84 is to	168	x	0.62	0	0	{'x': 0.62, 'y': 0.16, 'what': 0.09, '': 0.05, '\\(': 0.03}	15190	1.53523e-09	0.617187	0.848633	original		0.03	FALSE	FALSE	FALSE	out-of-context	{}
Mathematics	math_double	30 is to 60 as 65 is to	130	x	0.62	0	0	{'x': 0.62, 'y': 0.11, '': 0.09, 'X': 0.06, 'what': 0.05}	1714	6.33299e-08	0.625	0.98292	original		0.03	FALSE	FALSE	FALSE	out-of-context	{}
Mathematics	math_double	50 is to 100 as 84 is to	168	x	0.62	0	0	{'x': 0.62, 'what': 0.11, 'y': 0.1, '': 0.07, 'X': 0.04}	17481	1.35333e-09	0.617187	0.825803	original		0.03	FALSE	FALSE	FALSE	out-of-context	{}
Mathematics	math_double	54 is to 108 as 8 is to	16	x	0.62	0	0	{'x': 0.62, 'what': 0.15, '': 0.12, 'y': 0.06, 'X': 0.01}	229	1.45286e-06	0.621092	0.997718	original		0.03	FALSE	FALSE	FALSE	out-of-context	{}
Mathematics	math_double	6 is to 12 as 74 is to	148	x	0.62	0	0	{'x': 0.62, 'y': 0.1, 'what': 0.09, '': 0.08, 'X': 0.05}	13457	5.06407e-09	0.621094	0.865902	original		0.03	FALSE	FALSE	FALSE	out-of-context	{}
Mathematics	math_double	6 is to 12 as 65 is to	130	x	0.62	0	0	{'x': 0.62, 'y': 0.11, '': 0.08, 'what': 0.06, 'X': 0.06}	8535	1.24564e-08	0.617187	0.914949	original		0.03	FALSE	FALSE	FALSE	out-of-context	{}
Mathematics	math_double	25 is to 50 as 8 is to	16	x	0.62	0	0	{'x': 0.62, '': 0.13, 'what': 0.12, 'y': 0.07, 'X': 0.02}	230	1.11014e-06	0.617186	0.997708	original		0.03	FALSE	FALSE	FALSE	out-of-context	{}
Mathematics	math_double	95 is to 190 as 74 is to	148	x	0.62	0	0	{'x': 0.62, 'y': 0.11, 'what': 0.1, '': 0.07, '\\(': 0.04}	8508	7.18865e-09	0.621094	0.915218	original		0.03	FALSE	FALSE	FALSE	out-of-context	{}
Mathematics	math_double	60 is to 120 as 98 is to	196	x	0.62	0	0	{'x': 0.62, 'y': 0.12, 'what': 0.11, '': 0.07, 'X': 0.04}	11463	2.28465e-09	0.625	0.885772	original		0.03	FALSE	FALSE	FALSE	out-of-context	{}
Mathematics	math_double	65 is to 130 as 74 is to	148	x	0.62	0	0	{'x': 0.62, 'y': 0.15, 'what': 0.1, '': 0.05, '\\(': 0.03}	9674	3.56522e-09	0.617187	0.903599	original		0.03	FALSE	FALSE	FALSE	out-of-context	{}
Mathematics	math_double	56 is to 112 as 8 is to	16	x	0.62	0	0	{'x': 0.62, '': 0.14, 'what': 0.14, 'y': 0.04, '\\(': 0.01}	121	1.16825e-05	0.624988	0.998794	original		0.03	FALSE	FALSE	FALSE	out-of-context	{}
Mathematics	math_division2	36 is to 18 as 94 is to	47	x	0.62	0	0	{'x': 0.62, '': 0.12, 'y': 0.12, 'what': 0.07, 'X': 0.03}	2891	2.70084e-08	0.621094	0.971191	original		0.03	FALSE	FALSE	FALSE	out-of-context	{}
Mathematics	math_division2	26 is to 13 as 62 is to	31	x	0.62	0	0	{'x': 0.62, 'y': 0.14, 'what': 0.09, '': 0.05, 'X': 0.04}	5350	1.19326e-08	0.625	0.946688	original		0.03	FALSE	FALSE	FALSE	out-of-context	{}
Mathematics	math_division2	24 is to 12 as 32 is to	16	x	0.62	0	0	{'x': 0.62, 'y': 0.14, 'what': 0.13, '': 0.03, 'X': 0.02}	291	8.49366e-07	0.624999	0.9971	original		0.03	FALSE	FALSE	FALSE	out-of-context	{}
Mathematics	math_division2	50 is to 25 as 28 is to	14	x	0.62	0	0	{'x': 0.62, 'y': 0.1, 'what': 0.1, '': 0.08, 'X': 0.04}	1856	6.89179e-08	0.617187	0.981505	original		0.03	FALSE	FALSE	FALSE	out-of-context	{}
Mathematics	math_division2	48 is to 24 as 94 is to	47	x	0.62	0	0	{'x': 0.62, 'y': 0.11, '': 0.09, 'what': 0.09, 'X': 0.03}	3067	4.02797e-08	0.617187	0.969438	original		0.03	FALSE	FALSE	FALSE	out-of-context	{}
Mathematics	math_division5	85 is to 17 as 80 is to	16	x	0.62	0	0	{'x': 0.62, 'what': 0.11, 'y': 0.1, '': 0.05, '\\(': 0.03}	533	6.48201e-07	0.624999	0.994689	original		0.03	FALSE	FALSE	FALSE	out-of-context	{}
Mathematics	math_division5	95 is to 19 as 80 is to	16	x	0.62	0	0	{'x': 0.62, 'what': 0.12, 'y': 0.09, '': 0.05, '\\(': 0.04}	610	4.30271e-07	0.625	0.993921	original		0.03	FALSE	FALSE	FALSE	out-of-context	{}
Mathematics	math_division2	90 is to 45 as 64 is to	32	x	0.62	0	0	{'x': 0.62, 'y': 0.14, 'what': 0.08, '': 0.06, '\\(': 0.03}	5765	1.73459e-08	0.617187	0.942552	original		0.03	FALSE	FALSE	FALSE	out-of-context	{}
Mathematics	math_division2	80 is to 40 as 32 is to	16	x	0.62	0	0	{'x': 0.62, 'y': 0.14, '': 0.1, 'what': 0.05, 'X': 0.03}	820	3.03611e-07	0.625	0.991829	original		0.03	FALSE	FALSE	FALSE	out-of-context	{}
Mathematics	math_double	28 is to 56 as 8 is to	16	x	0.61	0	0	{'x': 0.61, 'what': 0.19, '': 0.07, 'y': 0.06, 'X': 0.02}	145	7.09295e-06	0.609368	0.998555	original		0.03	FALSE	FALSE	FALSE	out-of-context	{}
Mathematics	math_double	20 is to 40 as 65 is to	130	x	0.61	0	0	{'x': 0.61, '': 0.11, 'y': 0.11, 'X': 0.06, 'what': 0.05}	2018	3.63216e-08	0.605469	0.979891	original		0.03	FALSE	FALSE	FALSE	out-of-context	{}
Mathematics	math_double	85 is to 170 as 8 is to	16	x	0.61	0	0	{'x': 0.61, '': 0.17, 'what': 0.11, 'y': 0.06, 'X': 0.02}	662	4.04194e-07	0.605468	0.993403	original		0.03	FALSE	FALSE	FALSE	out-of-context	{}
Mathematics	math_double	80 is to 160 as 8 is to	16	x	0.61	0	0	{'x': 0.61, '': 0.21, 'what': 0.08, 'y': 0.03, 'X': 0.02}	346	8.82894e-07	0.605468	0.996552	original		0.03	FALSE	FALSE	FALSE	out-of-context	{}
Mathematics	math_double	78 is to 156 as 8 is to	16	x	0.61	0	0	{'x': 0.61, 'what': 0.16, '': 0.13, 'y': 0.04, 'X': 0.02}	404	8.04663e-07	0.605468	0.995974	original		0.03	FALSE	FALSE	FALSE	out-of-context	{}
Mathematics	math_double	60 is to 120 as 74 is to	148	x	0.61	0	0	{'x': 0.61, 'y': 0.12, 'what': 0.11, '': 0.07, 'X': 0.03}	6781	5.61704e-09	0.613281	0.932428	original		0.03	FALSE	FALSE	FALSE	out-of-context	{}
Mathematics	math_double	72 is to 144 as 65 is to	130	x	0.61	0	0	{'x': 0.61, '': 0.1, 'y': 0.1, 'what': 0.1, 'X': 0.03}	3512	3.21306e-08	0.613281	0.965003	original		0.03	FALSE	FALSE	FALSE	out-of-context	{}
Mathematics	math_double	66 is to 132 as 8 is to	16	x	0.61	0	0	{'x': 0.61, 'what': 0.15, '': 0.14, 'y': 0.04, 'X': 0.02}	177	2.5481e-06	0.613279	0.998236	original		0.03	FALSE	FALSE	FALSE	out-of-context	{}
Mathematics	math_division2	26 is to 13 as 32 is to	16	x	0.61	0	0	{'x': 0.61, 'y': 0.2, 'what': 0.06, 'X': 0.03, '\\(': 0.02}	327	8.23289e-07	0.609374	0.996741	original		0.03	FALSE	FALSE	FALSE	out-of-context	{}
Mathematics	math_division5	5 is to 1 as 80 is to	16	x	0.61	0	0	{'x': 0.61, '': 0.11, 'y': 0.08, 'X': 0.05, 'the': 0.05}	2607	2.42144e-07	0.609375	0.974021	original		0.03	FALSE	FALSE	FALSE	out-of-context	{}
Mathematics	math_division2	70 is to 35 as 32 is to	16	x	0.61	0	0	{'x': 0.61, 'y': 0.13, '': 0.1, 'what': 0.06, '\\(': 0.02}	769	4.09782e-07	0.605468	0.992337	original		0.03	FALSE	FALSE	FALSE	out-of-context	{}
Mathematics	math_division2	80 is to 40 as 28 is to	14	x	0.61	0	0	{'x': 0.61, 'y': 0.12, '': 0.12, 'what': 0.05, 'X': 0.04}	1833	9.31323e-08	0.609375	0.981734	original		0.03	FALSE	FALSE	FALSE	out-of-context	{}
Semantic Relations	animal_shelter	lion is to den as wolf is to	den	pack	0.61	0	0	{'pack': 0.61, '': 0.02, '?': 0.02, '_____': 0.02}	42	0.00136566	0.604103	0.999581	original		0.03	FALSE	FALSE	FALSE	related	{}
Mathematics	math_double	30 is to 60 as 28 is to	56	x	0.6	0	0	{'x': 0.6, 'y': 0.17, 'what': 0.09, '': 0.06, 'X': 0.03}	4469	1.30967e-08	0.601562	0.955467	original		0.03	FALSE	FALSE	FALSE	out-of-context	{}
Mathematics	math_double	50 is to 100 as 74 is to	148	x	0.6	0	0	{'x': 0.6, 'what': 0.12, '': 0.08, 'y': 0.08, 'X': 0.05}	8855	4.88944e-09	0.601562	0.911761	original		0.03	FALSE	FALSE	FALSE	out-of-context	{}
Mathematics	math_double	85 is to 170 as 65 is to	130	x	0.6	0	0	{'x': 0.6, '': 0.12, 'what': 0.1, 'y': 0.08, 'X': 0.04}	1005	1.47149e-07	0.601562	0.989985	original		0.03	FALSE	FALSE	FALSE	out-of-context	{}
Mathematics	math_double	84 is to 168 as 8 is to	16	x	0.6	0	0	{'x': 0.6, '': 0.16, 'what': 0.14, 'y': 0.03, 'X': 0.03}	265	2.04146e-06	0.60156	0.997359	original		0.03	FALSE	FALSE	FALSE	out-of-context	{}
Mathematics	math_division2	40 is to 20 as 28 is to	14	x	0.6	0	0	{'x': 0.6, 'y': 0.14, 'what': 0.11, '': 0.07, 'X': 0.03}	1501	9.17353e-08	0.601562	0.985043	original		0.03	FALSE	FALSE	FALSE	out-of-context	{}
Mathematics	math_squares	16 is to 256 as 4 is to	16	x	0.6	0	0	{'x': 0.6, 'what': 0.15, '': 0.09, 'X': 0.05, 'y': 0.04}	321	1.62423e-06	0.597655	0.996801	original		0.03	FALSE	FALSE	FALSE	out-of-context	{}
Mathematics	math_division2	72 is to 36 as 94 is to	47	x	0.6	0	0	{'x': 0.6, 'y': 0.13, '': 0.1, 'what': 0.09, '\\(': 0.02}	2379	4.74975e-08	0.601562	0.976293	original		0.03	FALSE	FALSE	FALSE	out-of-context	{}
Mathematics	math_division2	86 is to 43 as 28 is to	14	x	0.6	0	0	{'x': 0.6, 'y': 0.21, 'what': 0.05, '\\(': 0.03, 'X': 0.03}	1169	1.05239e-07	0.601562	0.988351	original		0.03	FALSE	FALSE	FALSE	out-of-context	{}
Mathematics	math_double	36 is to 72 as 65 is to	130	x	0.59	0	0	{'x': 0.59, 'y': 0.11, '': 0.11, 'what': 0.09, 'X': 0.03}	3523	2.92202e-08	0.585937	0.964894	original		0.03	FALSE	FALSE	FALSE	out-of-context	{}
Mathematics	math_double	42 is to 84 as 8 is to	16	x	0.59	0	0	{'x': 0.59, 'what': 0.15, '': 0.13, 'y': 0.06, '\\(': 0.02}	154	6.52671e-06	0.585931	0.998465	original		0.03	FALSE	FALSE	FALSE	out-of-context	{}
Mathematics	math_double	30 is to 60 as 74 is to	148	x	0.59	0	0	{'x': 0.59, '': 0.12, 'y': 0.11, 'what': 0.09, 'X': 0.05}	7864	6.63567e-09	0.585937	0.921636	original		0.03	FALSE	FALSE	FALSE	out-of-context	{}
Mathematics	math_double	96 is to 192 as 8 is to	16	x	0.59	0	0	{'x': 0.59, 'what': 0.17, '': 0.13, 'y': 0.04, 'the': 0.01}	179	3.93391e-06	0.593746	0.998216	original		0.03	FALSE	FALSE	FALSE	out-of-context	{}
Mathematics	math_double	90 is to 180 as 74 is to	148	x	0.59	0	0	{'x': 0.59, 'what': 0.13, 'y': 0.1, '': 0.08, 'X': 0.03}	8535	5.84987e-09	0.59375	0.914949	original		0.03	FALSE	FALSE	FALSE	out-of-context	{}
Mathematics	math_division2	52 is to 26 as 94 is to	47	x	0.59	0	0	{'x': 0.59, 'y': 0.16, 'what': 0.11, '': 0.05, 'X': 0.03}	2146	4.84288e-08	0.589844	0.978615	original		0.03	FALSE	FALSE	FALSE	out-of-context	{}
Mathematics	math_division5	5 is to 1 as 70 is to	14	x	0.59	0	0	{'x': 0.59, '': 0.12, 'y': 0.08, 'X': 0.05, 'the': 0.04}	4471	1.33179e-07	0.59375	0.955447	original		0.03	FALSE	FALSE	FALSE	out-of-context	{}
Mathematics	math_division2	96 is to 48 as 64 is to	32	x	0.59	0	0	{'x': 0.59, 'y': 0.14, 'what': 0.11, '': 0.06, 'X': 0.03}	3833	3.18978e-08	0.585937	0.961804	original		0.03	FALSE	FALSE	FALSE	out-of-context	{}
Semantic Hierarchies	hyponyms_misc	ukulele is to guitar as diamond is to	jewel	coal	0.59	0	0	{'coal': 0.59, 'graphite': 0.15, 'charcoal': 0.06, 'carbon': 0.03, 'quartz': 0.02}	113	0.000151634	0.585786	0.998874	original		0.03	FALSE	FALSE	FALSE	out-of-context	{}
Mathematics	math_double	36 is to 72 as 84 is to	168	x	0.58	0	0	{'x': 0.58, 'y': 0.17, 'what': 0.11, '': 0.06, '\\(': 0.03}	14149	2.2701e-09	0.582031	0.859006	original		0.03	FALSE	FALSE	FALSE	out-of-context	{}
Mathematics	math_double	35 is to 70 as 65 is to	130	x	0.58	0	0	{'x': 0.58, 'y': 0.13, '': 0.1, 'what': 0.06, 'X': 0.04}	1491	8.70787e-08	0.582031	0.985142	original		0.03	FALSE	FALSE	FALSE	out-of-context	{}
Mathematics	math_double	45 is to 90 as 8 is to	16	x	0.58	0	0	{'x': 0.58, 'what': 0.15, '': 0.14, 'y': 0.07, '\\(': 0.02}	188	2.5034e-06	0.582029	0.998127	original		0.03	FALSE	FALSE	FALSE	out-of-context	{}
Mathematics	math_double	24 is to 48 as 65 is to	130	x	0.58	0	0	{'x': 0.58, '': 0.1, 'what': 0.1, 'y': 0.09, 'X': 0.05}	4380	2.33995e-08	0.582031	0.956354	original		0.03	FALSE	FALSE	FALSE	out-of-context	{}
Mathematics	math_double	86 is to 172 as 8 is to	16	x	0.58	0	0	{'x': 0.58, '': 0.17, 'what': 0.13, 'y': 0.04, '?': 0.02}	281	2.27988e-06	0.582029	0.9972	original		0.03	FALSE	FALSE	FALSE	out-of-context	{}
Mathematics	math_division2	38 is to 19 as 94 is to	47	x	0.58	0	0	{'x': 0.58, 'y': 0.17, 'what': 0.1, '': 0.05, 'X': 0.04}	2250	4.47035e-08	0.582031	0.977579	original		0.03	FALSE	FALSE	FALSE	out-of-context	{}
Mathematics	math_division2	56 is to 28 as 94 is to	47	x	0.58	0	0	{'x': 0.58, 'y': 0.15, 'what': 0.11, '': 0.08, 'X': 0.02}	2106	4.02797e-08	0.582031	0.979014	original		0.03	FALSE	FALSE	FALSE	out-of-context	{}
Mathematics	math_division2	86 is to 43 as 94 is to	47	x	0.58	0	0	{'x': 0.58, 'y': 0.24, 'what': 0.05, '': 0.03, 'Y': 0.03}	2551	3.28291e-08	0.578125	0.974579	original		0.03	FALSE	FALSE	FALSE	out-of-context	{}
Mathematics	math_double	14 is to 28 as 8 is to	16	x	0.57	0	0	{'x': 0.57, 'what': 0.26, 'y': 0.06, '': 0.05, 'X': 0.02}	160	3.8445e-06	0.570309	0.998406	original		0.03	FALSE	FALSE	FALSE	out-of-context	{}
Mathematics	math_double	12 is to 24 as 98 is to	196	x	0.57	0	0	{'x': 0.57, '': 0.13, 'what': 0.13, 'y': 0.07, 'X': 0.04}	14260	2.59024e-09	0.566406	0.8579	original		0.03	FALSE	FALSE	FALSE	out-of-context	{}
Mathematics	math_double	6 is to 12 as 8 is to	16	x	0.57	0	0	{'x': 0.57, 'y': 0.24, 'what': 0.08, '': 0.05, 'X': 0.02}	168	2.99513e-06	0.57031	0.998326	original		0.03	FALSE	FALSE	FALSE	out-of-context	{}
Mathematics	math_double	80 is to 160 as 74 is to	148	x	0.57	0	0	{'x': 0.57, '': 0.16, 'what': 0.1, 'y': 0.08, 'X': 0.04}	7150	7.79983e-09	0.570312	0.928751	original		0.03	FALSE	FALSE	FALSE	out-of-context	{}
Mathematics	math_double	90 is to 180 as 28 is to	56	x	0.57	0	0	{'x': 0.57, 'what': 0.11, '': 0.1, 'y': 0.1, 'X': 0.04}	2964	3.39933e-08	0.574219	0.970464	original		0.03	FALSE	FALSE	FALSE	out-of-context	{}
Mathematics	math_double	92 is to 184 as 8 is to	16	x	0.57	0	0	{'x': 0.57, 'what': 0.22, '': 0.12, 'y': 0.03, 'X': 0.02}	288	1.37091e-06	0.570311	0.99713	original		0.03	FALSE	FALSE	FALSE	out-of-context	{}
Mathematics	math_double	94 is to 188 as 8 is to	16	x	0.57	0	0	{'x': 0.57, '': 0.16, 'what': 0.16, 'y': 0.06, 'X': 0.02}	361	1.01328e-06	0.566405	0.996403	original		0.03	FALSE	FALSE	FALSE	out-of-context	{}
Mathematics	math_division2	4 is to 2 as 62 is to	31	x	0.57	0	0	{'x': 0.57, '': 0.11, 'y': 0.1, 'what': 0.09, 'X': 0.06}	6110	2.7474e-08	0.566406	0.939114	original		0.03	FALSE	FALSE	FALSE	out-of-context	{}
Mathematics	math_division2	2 is to 1 as 28 is to	14	x	0.57	0	0	{'x': 0.57, '': 0.13, 'y': 0.09, 'X': 0.07, 'what': 0.06}	942	8.23289e-07	0.566405	0.990613	original		0.03	FALSE	FALSE	FALSE	out-of-context	{}
Mathematics	math_division2	18 is to 9 as 94 is to	47	x	0.57	0	0	{'x': 0.57, 'y': 0.16, 'what': 0.1, '': 0.09, 'X': 0.02}	3738	3.07336e-08	0.570312	0.962751	original		0.03	FALSE	FALSE	FALSE	out-of-context	{}
Mathematics	math_division2	96 is to 48 as 32 is to	16	x	0.57	0	0	{'x': 0.57, 'y': 0.17, 'what': 0.1, '': 0.06, '\\(': 0.03}	651	4.19095e-07	0.574218	0.993513	original		0.03	FALSE	FALSE	FALSE	out-of-context	{}
Mathematics	math_double	5 is to 10 as 65 is to	130	x	0.57	0	0	{'x': 0.57, 'y': 0.11, 'what': 0.11, '': 0.08, 'X': 0.05}	4335	2.45636e-08	0.574219	0.956802	original		0.03	FALSE	FALSE	FALSE	out-of-context	{}
Mathematics	math_division2	90 is to 45 as 32 is to	16	x	0.57	0	0	{'x': 0.57, 'y': 0.16, 'what': 0.09, '': 0.08, 'X': 0.03}	663	4.02331e-07	0.570312	0.993393	original		0.03	FALSE	FALSE	FALSE	out-of-context	{}
Semantic Hierarchies	hyponyms_misc	daypack is to backpack as diamond is to	jewel	coal	0.57	0	0	{'coal': 0.57, 'graphite': 0.06, 'charcoal': 0.05, 'carbon': 0.04, 'diamond': 0.03}	15	0.00379944	0.562607	0.999851	original		0.03	FALSE	FALSE	FALSE	out-of-context	{}
Mathematics	math_double	40 is to 80 as 74 is to	148	x	0.56	0	0	{'x': 0.56, '': 0.12, 'y': 0.12, 'what': 0.11, 'X': 0.04}	8300	6.72298e-09	0.5625	0.917291	original		0.03	FALSE	FALSE	FALSE	out-of-context	{}
Mathematics	math_double	48 is to 96 as 65 is to	130	x	0.56	0	0	{'x': 0.56, 'what': 0.14, '': 0.1, 'y': 0.09, 'X': 0.04}	2714	4.5402e-08	0.5625	0.972955	original		0.03	FALSE	FALSE	FALSE	out-of-context	{}
Mathematics	math_double	56 is to 112 as 65 is to	130	x	0.56	0	0	{'x': 0.56, 'what': 0.13, '': 0.11, 'y': 0.11, '\\(': 0.02}	1867	8.14907e-08	0.558594	0.981395	original		0.03	FALSE	FALSE	FALSE	out-of-context	{}
Mathematics	math_double	72 is to 144 as 84 is to	168	x	0.56	0	0	{'x': 0.56, 'what': 0.15, 'y': 0.15, '': 0.06, '\\(': 0.02}	9001	4.45289e-09	0.558594	0.910306	original		0.03	FALSE	FALSE	FALSE	out-of-context	{}
Mathematics	math_double	72 is to 144 as 74 is to	148	x	0.56	0	0	{'x': 0.56, 'what': 0.16, 'y': 0.12, '': 0.08, '\\(': 0.02}	7112	9.54606e-09	0.5625	0.929129	original		0.03	FALSE	FALSE	FALSE	out-of-context	{}
Mathematics	math_division2	36 is to 18 as 32 is to	16	x	0.56	0	0	{'x': 0.56, 'y': 0.18, 'what': 0.12, '': 0.06, 'X': 0.02}	524	3.66941e-07	0.5625	0.994778	original		0.03	FALSE	FALSE	FALSE	out-of-context	{}
Mathematics	math_division2	48 is to 24 as 32 is to	16	x	0.56	0	0	{'x': 0.56, 'y': 0.15, 'what': 0.15, '': 0.05, 'X': 0.03}	507	4.65661e-07	0.5625	0.994948	original		0.03	FALSE	FALSE	FALSE	out-of-context	{}
Mathematics	math_division2	2 is to 1 as 64 is to	32	x	0.56	0	0	{'x': 0.56, '': 0.18, 'X': 0.07, 'y': 0.06, 'what': 0.05}	1892	3.20375e-07	0.558593	0.981146	original		0.03	FALSE	FALSE	FALSE	out-of-context	{}
Mathematics	math_division2	76 is to 38 as 80 is to	40	x	0.56	0	0	{'x': 0.56, 'y': 0.24, 'what': 0.09, '': 0.03, '\\(': 0.02}	1681	6.75209e-08	0.5625	0.983249	original		0.03	FALSE	FALSE	FALSE	out-of-context	{}
Mathematics	math_double	38 is to 76 as 16 is to	32	x	0.55	0	0	{'x': 0.55, 'what': 0.14, '': 0.12, 'y': 0.09, 'X': 0.04}	1811	1.06171e-07	0.554687	0.981954	original		0.03	FALSE	FALSE	FALSE	out-of-context	{}
Mathematics	math_double	40 is to 80 as 98 is to	196	x	0.55	0	0	{'x': 0.55, 'y': 0.13, '': 0.12, 'what': 0.1, 'X': 0.04}	9752	4.83124e-09	0.550781	0.902822	original		0.03	FALSE	FALSE	FALSE	out-of-context	{}
Mathematics	math_double	40 is to 80 as 28 is to	56	x	0.55	0	0	{'x': 0.55, 'y': 0.14, '': 0.12, 'what': 0.1, 'X': 0.04}	2649	3.91155e-08	0.550781	0.973603	original		0.03	FALSE	FALSE	FALSE	out-of-context	{}
Mathematics	math_double	48 is to 96 as 8 is to	16	x	0.55	0	0	{'x': 0.55, 'what': 0.18, '': 0.14, 'y': 0.05, 'the': 0.01}	145	9.17912e-06	0.546866	0.998555	original		0.03	FALSE	FALSE	FALSE	out-of-context	{}
Mathematics	math_double	14 is to 28 as 65 is to	130	x	0.55	0	0	{'x': 0.55, 'what': 0.1, 'y': 0.1, 'X': 0.09, '': 0.08}	5662	1.5134e-08	0.554687	0.943579	original		0.03	FALSE	FALSE	FALSE	out-of-context	{}
Mathematics	math_double	12 is to 24 as 74 is to	148	x	0.55	0	0	{'x': 0.55, 'what': 0.15, '': 0.14, 'y': 0.06, 'X': 0.05}	10704	5.12227e-09	0.546875	0.893335	original		0.03	FALSE	FALSE	FALSE	out-of-context	{}
Mathematics	math_double	12 is to 24 as 8 is to	16	x	0.55	0	0	{'x': 0.55, 'what': 0.29, 'y': 0.08, '': 0.05, '\\(': 0.01}	184	2.01166e-06	0.546873	0.998166	original		0.03	FALSE	FALSE	FALSE	out-of-context	{}
Mathematics	math_double	8 is to 16 as 84 is to	168	x	0.55	0	0	{'x': 0.55, 'what': 0.14, 'y': 0.12, '': 0.07, 'X': 0.05}	16347	3.66708e-09	0.550781	0.837103	original		0.03	FALSE	FALSE	FALSE	out-of-context	{}
Mathematics	math_double	26 is to 52 as 65 is to	130	x	0.55	0	0	{'x': 0.55, 'y': 0.12, 'what': 0.1, 'X': 0.08, '': 0.07}	3070	6.23986e-08	0.546875	0.969408	original		0.03	FALSE	FALSE	FALSE	out-of-context	{}
Mathematics	math_double	26 is to 52 as 98 is to	196	x	0.55	0	0	{'x': 0.55, 'what': 0.15, 'y': 0.11, 'X': 0.07, '': 0.06}	7145	1.27475e-08	0.550781	0.928801	original		0.03	FALSE	FALSE	FALSE	out-of-context	{}
Mathematics	math_double	20 is to 40 as 74 is to	148	x	0.55	0	0	{'x': 0.55, '': 0.16, 'what': 0.1, 'y': 0.09, 'X': 0.05}	9263	4.65661e-09	0.550781	0.907695	original		0.03	FALSE	FALSE	FALSE	out-of-context	{}
Mathematics	math_double	22 is to 44 as 65 is to	130	x	0.55	0	0	{'x': 0.55, 'y': 0.11, '': 0.1, 'what': 0.09, 'X': 0.06}	5514	2.45636e-08	0.550781	0.945053	original		0.03	FALSE	FALSE	FALSE	out-of-context	{}
Mathematics	math_double	86 is to 172 as 65 is to	130	x	0.55	0	0	{'x': 0.55, '': 0.13, 'what': 0.13, 'y': 0.1, 'X': 0.02}	1328	1.68569e-07	0.546875	0.986767	original		0.03	FALSE	FALSE	FALSE	out-of-context	{}
Mathematics	math_double	96 is to 192 as 65 is to	130	x	0.55	0	0	{'x': 0.55, '': 0.13, 'what': 0.12, 'y': 0.08, 'X': 0.03}	2536	5.40167e-08	0.550781	0.974729	original		0.03	FALSE	FALSE	FALSE	out-of-context	{}
Mathematics	math_double	72 is to 144 as 98 is to	196	x	0.55	0	0	{'x': 0.55, 'what': 0.14, '': 0.12, 'y': 0.11, 'X': 0.03}	9532	4.07454e-09	0.554687	0.905014	original		0.03	FALSE	FALSE	FALSE	out-of-context	{}
Mathematics	math_division2	42 is to 21 as 94 is to	47	x	0.55	0	0	{'x': 0.55, 'y': 0.16, 'what': 0.11, '': 0.1, '\\(': 0.03}	2682	3.53903e-08	0.546875	0.973274	original		0.03	FALSE	FALSE	FALSE	out-of-context	{}
Mathematics	math_division2	2 is to 1 as 32 is to	16	x	0.55	0	0	{'x': 0.55, '': 0.18, 'X': 0.07, 'what': 0.06, 'y': 0.05}	206	9.17912e-06	0.550772	0.997947	original		0.03	FALSE	FALSE	FALSE	out-of-context	{}
Mathematics	math_division2	22 is to 11 as 62 is to	31	x	0.55	0	0	{'x': 0.55, 'y': 0.14, 'what': 0.13, '': 0.08, 'X': 0.03}	6439	1.96742e-08	0.546875	0.935836	original		0.03	FALSE	FALSE	FALSE	out-of-context	{}
Mathematics	math_division2	22 is to 11 as 46 is to	23	x	0.55	0	0	{'x': 0.55, 'y': 0.14, 'what': 0.13, '': 0.08, 'X': 0.03}	2243	8.19564e-08	0.550781	0.977649	original		0.03	FALSE	FALSE	FALSE	out-of-context	{}
Mathematics	math_division5	55 is to 11 as 80 is to	16	x	0.55	0	0	{'x': 0.55, 'y': 0.2, 'what': 0.11, '': 0.05, '\\(': 0.04}	406	6.81728e-07	0.554687	0.995954	original		0.03	FALSE	FALSE	FALSE	out-of-context	{}
Mathematics	math_division2	96 is to 48 as 62 is to	31	x	0.55	0	0	{'x': 0.55, 'y': 0.13, 'what': 0.12, '': 0.11, 'X': 0.03}	8005	9.0804e-09	0.550781	0.920231	original		0.03	FALSE	FALSE	FALSE	out-of-context	{}
Mathematics	math_division2	96 is to 48 as 28 is to	14	x	0.55	0	0	{'x': 0.55, 'y': 0.14, 'what': 0.12, '': 0.09, '\\(': 0.03}	1649	1.14553e-07	0.550781	0.983568	original		0.03	FALSE	FALSE	FALSE	out-of-context	{}
Mathematics	math_division2	96 is to 48 as 94 is to	47	x	0.55	0	0	{'x': 0.55, 'y': 0.14, 'what': 0.13, '': 0.09, '\\(': 0.02}	2173	9.40636e-08	0.546875	0.978346	original		0.03	FALSE	FALSE	FALSE	out-of-context	{}
Mathematics	math_division2	72 is to 36 as 64 is to	32	x	0.55	0	0	{'x': 0.55, 'y': 0.16, 'what': 0.13, '': 0.06, '\\(': 0.03}	5044	2.25846e-08	0.554687	0.949737	original		0.03	FALSE	FALSE	FALSE	out-of-context	{}
Mathematics	math_double	35 is to 70 as 74 is to	148	x	0.54	0	0	{'x': 0.54, 'y': 0.18, 'what': 0.11, '': 0.06, '\\(': 0.04}	9165	5.20959e-09	0.542969	0.908671	original		0.03	FALSE	FALSE	FALSE	out-of-context	{}
Mathematics	math_double	44 is to 88 as 8 is to	16	x	0.54	0	0	{'x': 0.54, '': 0.19, 'what': 0.13, 'y': 0.07, '\\(': 0.01}	121	1.54972e-05	0.535141	0.998794	original		0.03	FALSE	FALSE	FALSE	out-of-context	{}
Mathematics	math_double	14 is to 28 as 98 is to	196	x	0.54	0	0	{'x': 0.54, 'what': 0.16, 'y': 0.09, 'X': 0.08, '': 0.07}	8752	5.41331e-09	0.542969	0.912787	original		0.03	FALSE	FALSE	FALSE	out-of-context	{}
Mathematics	math_double	14 is to 28 as 84 is to	168	x	0.54	0	0	{'x': 0.54, 'what': 0.17, 'y': 0.11, 'X': 0.06, '': 0.06}	9799	4.59841e-09	0.539062	0.902354	original		0.03	FALSE	FALSE	FALSE	out-of-context	{}
Mathematics	math_double	15 is to 30 as 65 is to	130	x	0.54	0	0	{'x': 0.54, 'y': 0.15, 'what': 0.1, '': 0.09, 'X': 0.07}	2134	3.72529e-08	0.542969	0.978735	original		0.03	FALSE	FALSE	FALSE	out-of-context	{}
Mathematics	math_double	15 is to 30 as 84 is to	168	x	0.54	0	0	{'x': 0.54, 'what': 0.15, 'y': 0.13, '': 0.1, 'X': 0.04}	11289	2.50293e-09	0.542969	0.887506	original		0.03	FALSE	FALSE	FALSE	out-of-context	{}
Mathematics	math_double	8 is to 16 as 65 is to	130	x	0.54	0	0	{'x': 0.54, 'what': 0.11, 'y': 0.1, '': 0.1, 'X': 0.07}	6782	1.54832e-08	0.535156	0.932418	original		0.03	FALSE	FALSE	FALSE	out-of-context	{}
Mathematics	math_double	25 is to 50 as 65 is to	130	x	0.54	0	0	{'x': 0.54, 'y': 0.14, '': 0.09, 'what': 0.09, 'X': 0.07}	1542	6.37956e-08	0.535156	0.984634	original		0.03	FALSE	FALSE	FALSE	out-of-context	{}
Mathematics	math_double	20 is to 40 as 98 is to	196	x	0.54	0	0	{'x': 0.54, '': 0.18, 'what': 0.09, 'y': 0.09, 'X': 0.05}	8279	5.50062e-09	0.539062	0.9175	original		0.03	FALSE	FALSE	FALSE	out-of-context	{}
Mathematics	math_double	85 is to 170 as 74 is to	148	x	0.54	0	0	{'x': 0.54, 'what': 0.17, 'y': 0.12, '': 0.1, '\\(': 0.02}	8081	7.04313e-09	0.535156	0.919473	original		0.03	FALSE	FALSE	FALSE	out-of-context	{}
Mathematics	math_double	88 is to 176 as 8 is to	16	x	0.54	0	0	{'x': 0.54, '': 0.21, 'what': 0.14, 'y': 0.03, '?': 0.02}	255	3.45707e-06	0.535153	0.997459	original		0.03	FALSE	FALSE	FALSE	out-of-context	{}
Mathematics	math_double	84 is to 168 as 65 is to	130	x	0.54	0	0	{'x': 0.54, '': 0.17, 'what': 0.11, 'y': 0.07, 'X': 0.05}	2135	6.98492e-08	0.542969	0.978725	original		0.03	FALSE	FALSE	FALSE	out-of-context	{}
Mathematics	math_double	78 is to 156 as 65 is to	130	x	0.54	0	0	{'x': 0.54, 'what': 0.14, '': 0.13, 'y': 0.1, 'X': 0.03}	2412	4.56348e-08	0.539062	0.975965	original		0.03	FALSE	FALSE	FALSE	out-of-context	{}
Mathematics	math_double	80 is to 160 as 98 is to	196	x	0.54	0	0	{'x': 0.54, '': 0.16, 'what': 0.12, 'y': 0.09, 'X': 0.04}	7083	6.8394e-09	0.539062	0.929418	original		0.03	FALSE	FALSE	FALSE	out-of-context	{}
Mathematics	math_double	64 is to 128 as 8 is to	16	x	0.54	0	0	{'x': 0.54, 'what': 0.2, '': 0.11, 'y': 0.04, 'X': 0.02}	144	1.29938e-05	0.542956	0.998565	original		0.03	FALSE	FALSE	FALSE	out-of-context	{}
Mathematics	math_double	58 is to 116 as 65 is to	130	x	0.54	0	0	{'x': 0.54, 'y': 0.17, 'what': 0.11, '': 0.1, 'X': 0.02}	2141	7.45058e-08	0.539062	0.978665	original		0.03	FALSE	FALSE	FALSE	out-of-context	{}
Mathematics	math_double	68 is to 136 as 8 is to	16	x	0.54	0	0	{'x': 0.54, '': 0.21, 'what': 0.15, 'y': 0.02, 'X': 0.02}	146	9.17912e-06	0.54296	0.998545	original		0.03	FALSE	FALSE	FALSE	out-of-context	{}
Mathematics	math_division2	38 is to 19 as 64 is to	32	x	0.54	0	0	{'x': 0.54, 'y': 0.23, 'what': 0.07, 'X': 0.04, '': 0.03}	4683	2.51457e-08	0.542969	0.953334	original		0.03	FALSE	FALSE	FALSE	out-of-context	{}
Mathematics	math_squares	2 is to 4 as 26 is to	676	x	0.54	0	0	{'x': 0.54, 'y': 0.12, '': 0.1, 'what': 0.09, 'X': 0.08}	28315	1.19326e-09	0.535156	0.717843	original		0.03	FALSE	FALSE	FALSE	out-of-context	{}
Mathematics	math_division2	22 is to 11 as 28 is to	14	x	0.54	0	0	{'x': 0.54, 'y': 0.21, 'what': 0.1, '': 0.04, '\\(': 0.03}	917	3.22238e-07	0.535156	0.990862	original		0.03	FALSE	FALSE	FALSE	out-of-context	{}
Mathematics	math_double	4 is to 8 as 65 is to	130	x	0.54	0	0	{'x': 0.54, 'y': 0.12, 'what': 0.1, '': 0.1, 'X': 0.06}	6159	2.39816e-08	0.535156	0.938626	original		0.03	FALSE	FALSE	FALSE	out-of-context	{}
Mathematics	math_division2	72 is to 36 as 62 is to	31	x	0.54	0	0	{'x': 0.54, 'y': 0.14, 'what': 0.13, '': 0.1, '\\(': 0.03}	7730	1.0361e-08	0.539062	0.922971	original		0.03	FALSE	FALSE	FALSE	out-of-context	{}
Mathematics	math_division2	88 is to 44 as 80 is to	40	x	0.54	0	0	{'x': 0.54, 'y': 0.17, 'what': 0.13, '': 0.05, '\\(': 0.04}	1687	1.47149e-07	0.535156	0.983189	original		0.03	FALSE	FALSE	FALSE	out-of-context	{}
Mathematics	math_division2	78 is to 39 as 94 is to	47	x	0.54	0	0	{'x': 0.54, 'y': 0.2, 'what': 0.11, '': 0.07, 'X': 0.03}	2026	4.98258e-08	0.542969	0.979811	original		0.03	FALSE	FALSE	FALSE	out-of-context	{}
Mathematics	math_double	32 is to 64 as 8 is to	16	x	0.53	0	0	{'x': 0.53, 'what': 0.24, '': 0.09, 'y': 0.05, 'X': 0.02}	183	7.80821e-06	0.531242	0.998176	original		0.03	FALSE	FALSE	FALSE	out-of-context	{}
Mathematics	math_double	45 is to 90 as 65 is to	130	x	0.53	0	0	{'x': 0.53, 'y': 0.13, 'what': 0.11, '': 0.11, '\\(': 0.04}	1375	8.6613e-08	0.53125	0.986298	original		0.03	FALSE	FALSE	FALSE	out-of-context	{}
Mathematics	math_double	15 is to 30 as 74 is to	148	x	0.53	0	0	{'x': 0.53, 'what': 0.14, '': 0.14, 'y': 0.1, 'X': 0.05}	9261	4.04543e-09	0.527344	0.907715	original		0.03	FALSE	FALSE	FALSE	out-of-context	{}
Mathematics	math_double	20 is to 40 as 28 is to	56	x	0.53	0	0	{'x': 0.53, 'y': 0.17, '': 0.1, 'what': 0.09, 'X': 0.04}	1718	5.00586e-08	0.53125	0.98288	original		0.03	FALSE	FALSE	FALSE	out-of-context	{}
Mathematics	math_double	18 is to 36 as 65 is to	130	x	0.53	0	0	{'x': 0.53, 'what': 0.13, 'y': 0.12, '': 0.09, 'X': 0.06}	4540	2.1304e-08	0.53125	0.954759	original		0.03	FALSE	FALSE	FALSE	out-of-context	{}
Mathematics	math_double	24 is to 48 as 16 is to	32	x	0.53	0	0	{'x': 0.53, 'what': 0.16, 'y': 0.13, '': 0.09, 'X': 0.03}	2383	4.65661e-08	0.53125	0.976254	original		0.03	FALSE	FALSE	FALSE	out-of-context	{}
Mathematics	math_division2	34 is to 17 as 32 is to	16	x	0.53	0	0	{'x': 0.53, 'y': 0.22, '': 0.06, 'what': 0.06, '\\(': 0.04}	303	1.78069e-06	0.531248	0.996981	original		0.03	FALSE	FALSE	FALSE	out-of-context	{}
Mathematics	math_squares	25 is to 625 as 4 is to	16	x	0.53	0	0	{'x': 0.53, '': 0.21, 'what': 0.11, 'X': 0.04, 'y': 0.03}	416	9.61125e-07	0.531249	0.995855	original		0.03	FALSE	FALSE	FALSE	out-of-context	{}
Mathematics	math_squares	8 is to 64 as 4 is to	16	x	0.53	0	0	{'x': 0.53, 'what': 0.21, '': 0.08, 'y': 0.07, 'X': 0.04}	365	1.51992e-06	0.531248	0.996363	original		0.03	FALSE	FALSE	FALSE	out-of-context	{}
Mathematics	math_squares	18 is to 324 as 4 is to	16	x	0.53	0	0	{'x': 0.53, 'what': 0.17, '': 0.16, 'y': 0.05, 'X': 0.03}	467	1.08778e-06	0.527343	0.995346	original		0.03	FALSE	FALSE	FALSE	out-of-context	{}
Mathematics	math_division2	16 is to 8 as 32 is to	16	x	0.53	0	0	{'x': 0.53, 'y': 0.25, 'what': 0.11, '': 0.05, 'X': 0.02}	223	1.81794e-06	0.527342	0.997778	original		0.03	FALSE	FALSE	FALSE	out-of-context	{}
Mathematics	math_division2	16 is to 8 as 28 is to	14	x	0.53	0	0	{'x': 0.53, 'y': 0.24, 'what': 0.12, '': 0.05, 'X': 0.02}	685	2.35625e-07	0.527344	0.993174	original		0.03	FALSE	FALSE	FALSE	out-of-context	{}
Mathematics	math_division2	60 is to 30 as 64 is to	32	x	0.53	0	0	{'x': 0.53, 'y': 0.24, 'what': 0.08, '': 0.05, 'X': 0.03}	3613	1.96742e-08	0.53125	0.963997	original		0.03	FALSE	FALSE	FALSE	out-of-context	{}
Mathematics	math_division2	76 is to 38 as 94 is to	47	x	0.53	0	0	{'x': 0.53, 'y': 0.25, 'what': 0.09, '': 0.05, '\\(': 0.02}	1800	5.12227e-08	0.53125	0.982063	original		0.03	FALSE	FALSE	FALSE	out-of-context	{}
Mathematics	math_division2	82 is to 41 as 28 is to	14	x	0.53	0	0	{'x': 0.53, 'y': 0.19, 'what': 0.12, '': 0.06, '\\(': 0.03}	906	2.55182e-07	0.527343	0.990972	original		0.03	FALSE	FALSE	FALSE	out-of-context	{}
Factual Knowledge	capital_world	Vaduz is to Liechtenstein as Antananarivo is to	madagascar	what	0.52	0	0	{'what': 0.52, '?': 0.05, '?"': 0.03, 'which': 0.03}	16	0.00482178	0.518616	0.999841	original		0.03	FALSE	FALSE	FALSE	out-of-context	{}
Mathematics	math_double	52 is to 104 as 74 is to	148	x	0.52	0	0	{'x': 0.52, 'what': 0.22, 'y': 0.08, '': 0.08, 'X': 0.04}	6143	1.68802e-08	0.515625	0.938785	original		0.03	FALSE	FALSE	FALSE	out-of-context	{}
Mathematics	math_double	45 is to 90 as 98 is to	196	x	0.52	0	0	{'x': 0.52, 'what': 0.14, 'y': 0.14, '': 0.1, '\\(': 0.04}	11488	3.47791e-09	0.515625	0.885523	original		0.03	FALSE	FALSE	FALSE	out-of-context	{}
Mathematics	math_double	54 is to 108 as 65 is to	130	x	0.52	0	0	{'x': 0.52, 'y': 0.14, 'what': 0.13, '': 0.11, 'X': 0.03}	2364	5.75092e-08	0.519531	0.976443	original		0.03	FALSE	FALSE	FALSE	out-of-context	{}
Mathematics	math_double	82 is to 164 as 8 is to	16	x	0.52	0	0	{'x': 0.52, 'what': 0.19, '': 0.18, 'X': 0.02, 'y': 0.02}	250	3.75509e-06	0.515621	0.997509	original		0.03	FALSE	FALSE	FALSE	out-of-context	{}
Mathematics	math_division2	52 is to 26 as 64 is to	32	x	0.52	0	0	{'x': 0.52, 'y': 0.22, 'what': 0.1, 'X': 0.03, '': 0.03}	3866	2.82889e-08	0.523437	0.961476	original		0.03	FALSE	FALSE	FALSE	out-of-context	{}
Mathematics	math_division2	54 is to 27 as 94 is to	47	x	0.52	0	0	{'x': 0.52, 'y': 0.18, 'what': 0.1, '': 0.1, 'X': 0.03}	2102	5.51809e-08	0.523437	0.979054	original		0.03	FALSE	FALSE	FALSE	out-of-context	{}
Mathematics	math_division2	42 is to 21 as 64 is to	32	x	0.52	0	0	{'x': 0.52, 'y': 0.24, 'what': 0.1, '\\(': 0.04, '': 0.04}	4305	1.88593e-08	0.519531	0.957101	original		0.03	FALSE	FALSE	FALSE	out-of-context	{}
Mathematics	math_division2	46 is to 23 as 94 is to	47	x	0.52	0	0	{'x': 0.52, 'y': 0.19, 'what': 0.13, '': 0.06, 'X': 0.03}	1861	5.42495e-08	0.515625	0.981455	original		0.03	FALSE	FALSE	FALSE	out-of-context	{}
Mathematics	math_division2	2 is to 1 as 94 is to	47	x	0.52	0	0	{'x': 0.52, '': 0.23, 'X': 0.06, 'y': 0.06, 'what': 0.05}	2347	2.58908e-07	0.515625	0.976612	original		0.03	FALSE	FALSE	FALSE	out-of-context	{}
Mathematics	math_squares	6 is to 36 as 26 is to	676	x	0.52	0	0	{'x': 0.52, 'y': 0.17, 'what': 0.13, '': 0.06, 'X': 0.05}	27477	1.28057e-09	0.523437	0.726194	original		0.03	FALSE	FALSE	FALSE	out-of-context	{}
Mathematics	math_squares	5 is to 25 as 4 is to	16	x	0.52	0	0	{'x': 0.52, 'what': 0.2, '': 0.12, 'y': 0.06, 'X': 0.04}	316	1.49757e-06	0.515624	0.996851	original		0.03	FALSE	FALSE	FALSE	out-of-context	{}
Mathematics	math_double	4 is to 8 as 8 is to	16		0.52	0	0	{'': 0.52, 'x': 0.19, 'what': 0.1, 'y': 0.03, 'X': 0.03}	121	4.95911e-05	0.515575	0.998794	original		0.03	FALSE	FALSE	FALSE	out-of-context	{}
Mathematics	math_division2	66 is to 33 as 94 is to	47	x	0.52	0	0	{'x': 0.52, 'y': 0.17, 'what': 0.15, '': 0.08, 'X': 0.03}	2649	5.33182e-08	0.515625	0.973603	original		0.03	FALSE	FALSE	FALSE	out-of-context	{}
Mathematics	math_division2	74 is to 37 as 28 is to	14	x	0.52	0	0	{'x': 0.52, 'y': 0.17, 'what': 0.13, '': 0.06, '\\(': 0.03}	1014	1.88127e-07	0.519531	0.989896	original		0.03	FALSE	FALSE	FALSE	out-of-context	{}
Mathematics	math_division2	72 is to 36 as 32 is to	16	x	0.52	0	0	{'x': 0.52, 'y': 0.18, 'what': 0.12, '': 0.08, '\\(': 0.03}	595	4.76837e-07	0.523437	0.994071	original		0.03	FALSE	FALSE	FALSE	out-of-context	{}
Mathematics	math_division2	88 is to 44 as 28 is to	14	x	0.52	0	0	{'x': 0.52, 'y': 0.15, 'what': 0.13, '': 0.09, '\\(': 0.03}	1053	3.35276e-07	0.519531	0.989507	original		0.03	FALSE	FALSE	FALSE	out-of-context	{}
Mathematics	math_double	45 is to 90 as 74 is to	148	x	0.51	0	0	{'x': 0.51, 'what': 0.2, 'y': 0.12, '': 0.08, '\\(': 0.04}	9465	4.16185e-09	0.507812	0.905682	original		0.03	FALSE	FALSE	FALSE	out-of-context	{}
Mathematics	math_double	14 is to 28 as 74 is to	148	x	0.51	0	0	{'x': 0.51, 'what': 0.19, 'y': 0.08, '': 0.07, 'X': 0.07}	8992	7.18865e-09	0.511719	0.910395	original		0.03	FALSE	FALSE	FALSE	out-of-context	{}
Mathematics	math_double	6 is to 12 as 16 is to	32	x	0.51	0	0	{'x': 0.51, 'y': 0.26, 'what': 0.08, '': 0.05, 'X': 0.03}	4928	1.93249e-08	0.511719	0.950893	original		0.03	FALSE	FALSE	FALSE	out-of-context	{}
Mathematics	math_double	10 is to 20 as 65 is to	130	x	0.51	0	0	{'x': 0.51, '': 0.13, 'what': 0.11, 'y': 0.1, 'X': 0.08}	2807	3.44589e-08	0.511719	0.972028	original		0.03	FALSE	FALSE	FALSE	out-of-context	{}
Mathematics	math_double	12 is to 24 as 16 is to	32	x	0.51	0	0	{'x': 0.51, 'what': 0.17, 'y': 0.16, '': 0.08, 'X': 0.03}	1722	5.09899e-08	0.511719	0.98284	original		0.03	FALSE	FALSE	FALSE	out-of-context	{}
Mathematics	math_double	22 is to 44 as 74 is to	148	x	0.51	0	0	{'x': 0.51, 'what': 0.16, 'y': 0.1, '': 0.1, 'X': 0.05}	8594	1.3446e-08	0.511719	0.914361	original		0.03	FALSE	FALSE	FALSE	out-of-context	{}
Mathematics	math_double	24 is to 48 as 28 is to	56	x	0.51	0	0	{'x': 0.51, 'what': 0.17, 'y': 0.15, '': 0.07, 'X': 0.03}	2056	6.0536e-08	0.511719	0.979512	original		0.03	FALSE	FALSE	FALSE	out-of-context	{}
Mathematics	math_double	55 is to 110 as 84 is to	168	x	0.51	0	0	{'x': 0.51, 'y': 0.21, 'what': 0.17, '': 0.05, '\\(': 0.03}	11497	2.92493e-09	0.507812	0.885433	original		0.03	FALSE	FALSE	FALSE	out-of-context	{}
Mathematics	math_division2	48 is to 24 as 28 is to	14	x	0.51	0	0	{'x': 0.51, 'what': 0.17, 'y': 0.14, '': 0.08, 'X': 0.03}	1357	1.4808e-07	0.507812	0.986478	original		0.03	FALSE	FALSE	FALSE	out-of-context	{}
Mathematics	math_double	5 is to 10 as 8 is to	16	x	0.51	0	0	{'x': 0.51, 'y': 0.21, 'what': 0.15, '': 0.06, 'X': 0.02}	274	1.40071e-06	0.511717	0.99727	original		0.03	FALSE	FALSE	FALSE	out-of-context	{}
Mathematics	math_division2	74 is to 37 as 94 is to	47	x	0.51	0	0	{'x': 0.51, 'y': 0.2, 'what': 0.12, '': 0.06, 'X': 0.03}	1468	8.6613e-08	0.507812	0.985371	original		0.03	FALSE	FALSE	FALSE	out-of-context	{}
Mathematics	math_double	36 is to 72 as 74 is to	148	x	0.5	0	0	{'x': 0.5, 'y': 0.15, 'what': 0.14, '': 0.09, '\\(': 0.03}	9830	7.01402e-09	0.5	0.902045	original		0.03	FALSE	FALSE	FALSE	out-of-context	{}
Mathematics	math_double	42 is to 84 as 65 is to	130	x	0.5	0	0	{'x': 0.5, 'what': 0.14, 'y': 0.12, '': 0.11, 'X': 0.04}	3779	3.05008e-08	0.496094	0.962343	original		0.03	FALSE	FALSE	FALSE	out-of-context	{}
Mathematics	math_double	25 is to 50 as 74 is to	148	x	0.5	0	0	{'x': 0.5, 'what': 0.15, '': 0.12, 'y': 0.1, 'X': 0.06}	6314	9.25502e-09	0.503906	0.937081	original		0.03	FALSE	FALSE	FALSE	out-of-context	{}
Mathematics	math_double	64 is to 128 as 28 is to	56	x	0.5	0	0	{'x': 0.5, 'what': 0.17, 'y': 0.1, '': 0.07, 'X': 0.05}	3058	6.47269e-08	0.5	0.969527	original		0.03	FALSE	FALSE	FALSE	out-of-context	{}
Mathematics	math_double	56 is to 112 as 28 is to	56	x	0.5	0	0	{'x': 0.5, 'what': 0.23, 'y': 0.1, '': 0.09, 'X': 0.02}	1008	1.32248e-07	0.5	0.989955	original		0.03	FALSE	FALSE	FALSE	out-of-context	{}
Mathematics	math_double	74 is to 148 as 65 is to	130	x	0.5	0	0	{'x': 0.5, 'what': 0.18, 'y': 0.12, '': 0.1, 'X': 0.03}	2551	5.16884e-08	0.503906	0.974579	original		0.03	FALSE	FALSE	FALSE	out-of-context	{}
Mathematics	math_division2	32 is to 16 as 62 is to	31	x	0.5	0	0	{'x': 0.5, 'what': 0.15, '': 0.13, 'y': 0.09, 'X': 0.05}	4140	3.91155e-08	0.503906	0.958745	original		0.03	FALSE	FALSE	FALSE	out-of-context	{}
Mathematics	math_division2	52 is to 26 as 32 is to	16	x	0.5	0	0	{'x': 0.5, 'y': 0.19, 'what': 0.14, '': 0.05, 'X': 0.03}	319	1.27405e-06	0.498046	0.996821	original		0.03	FALSE	FALSE	FALSE	out-of-context	{}
Mathematics	math_division2	18 is to 9 as 32 is to	16	x	0.5	0	0	{'x': 0.5, 'y': 0.25, 'what': 0.13, '': 0.04, 'X': 0.02}	321	7.6741e-07	0.503905	0.996801	original		0.03	FALSE	FALSE	FALSE	out-of-context	{}
Mathematics	math_double	2 is to 4 as 65 is to	130	x	0.5	0	0	{'x': 0.5, '': 0.14, 'X': 0.1, 'y': 0.09, 'what': 0.08}	5907	2.79397e-08	0.5	0.941137	original		0.03	FALSE	FALSE	FALSE	out-of-context	{}
Mathematics	math_division2	84 is to 42 as 64 is to	32	x	0.5	0	0	{'x': 0.5, 'y': 0.21, 'what': 0.14, '': 0.04, '\\(': 0.03}	4980	1.95578e-08	0.5	0.950375	original		0.03	FALSE	FALSE	FALSE	out-of-context	{}
Mathematics	math_division2	88 is to 44 as 94 is to	47	x	0.5	0	0	{'x': 0.5, 'y': 0.19, 'what': 0.14, '': 0.07, '\\(': 0.03}	2082	9.68575e-08	0.503906	0.979253	original		0.03	FALSE	FALSE	FALSE	out-of-context	{}
Mathematics	math_division2	78 is to 39 as 62 is to	31	x	0.5	0	0	{'x': 0.5, 'y': 0.16, 'what': 0.14, '': 0.1, 'X': 0.03}	5799	1.53668e-08	0.503906	0.942213	original		0.03	FALSE	FALSE	FALSE	out-of-context	{}
Mathematics	math_double	54 is to 108 as 16 is to	32	x	0.49	0	0	{'x': 0.49, 'what': 0.15, '': 0.15, 'y': 0.12, 'X': 0.04}	2772	5.02914e-08	0.490234	0.972377	original		0.03	FALSE	FALSE	FALSE	out-of-context	{}
Mathematics	math_double	15 is to 30 as 8 is to	16	x	0.49	0	0	{'x': 0.49, 'what': 0.3, '': 0.09, 'y': 0.08, 'X': 0.01}	257	7.41333e-07	0.490234	0.997439	original		0.03	FALSE	FALSE	FALSE	out-of-context	{}
Mathematics	math_double	8 is to 16 as 74 is to	148	x	0.49	0	0	{'x': 0.49, 'what': 0.17, '': 0.12, 'y': 0.08, 'X': 0.07}	14927	5.67525e-09	0.492187	0.851254	original		0.03	FALSE	FALSE	FALSE	out-of-context	{}
Mathematics	math_double	24 is to 48 as 74 is to	148	x	0.49	0	0	{'x': 0.49, 'what': 0.17, '': 0.12, 'y': 0.09, 'X': 0.05}	7805	1.10595e-08	0.494141	0.922224	original		0.03	FALSE	FALSE	FALSE	out-of-context	{}
Mathematics	math_double	18 is to 36 as 20 is to	40	x	0.49	0	0	{'x': 0.49, 'y': 0.21, 'what': 0.16, '': 0.05, 'X': 0.03}	862	1.50874e-07	0.49414	0.99141	original		0.03	FALSE	FALSE	FALSE	out-of-context	{}
Mathematics	math_double	88 is to 176 as 65 is to	130	x	0.49	0	0	{'x': 0.49, 'what': 0.17, '': 0.15, 'y': 0.11, 'X': 0.02}	1895	9.91859e-08	0.490234	0.981116	original		0.03	FALSE	FALSE	FALSE	out-of-context	{}
Mathematics	math_double	62 is to 124 as 65 is to	130	x	0.49	0	0	{'x': 0.49, 'y': 0.18, 'what': 0.16, '': 0.07, 'X': 0.02}	1779	1.15018e-07	0.486328	0.982272	original		0.03	FALSE	FALSE	FALSE	out-of-context	{}
Mathematics	math_double	56 is to 112 as 16 is to	32	x	0.49	0	0	{'x': 0.49, 'what': 0.16, '': 0.16, 'y': 0.09, 'X': 0.03}	2056	8.28877e-08	0.492187	0.979512	original		0.03	FALSE	FALSE	FALSE	out-of-context	{}
Mathematics	math_double	58 is to 116 as 74 is to	148	x	0.49	0	0	{'x': 0.49, 'what': 0.21, 'y': 0.16, '': 0.09, 'Y': 0.01}	8616	6.49015e-09	0.486328	0.914142	original		0.03	FALSE	FALSE	FALSE	out-of-context	{}
Mathematics	math_double	5 is to 10 as 74 is to	148	x	0.49	0	0	{'x': 0.49, 'what': 0.17, '': 0.13, 'y': 0.1, 'X': 0.05}	15302	3.55067e-09	0.486328	0.847517	original		0.03	FALSE	FALSE	FALSE	out-of-context	{}
Mathematics	math_division2	38 is to 19 as 32 is to	16	x	0.49	0	0	{'x': 0.49, 'y': 0.21, 'what': 0.1, '': 0.06, 'X': 0.04}	429	1.06543e-06	0.490233	0.995725	original		0.03	FALSE	FALSE	FALSE	out-of-context	{}
Mathematics	math_division2	46 is to 23 as 64 is to	32	x	0.49	0	0	{'x': 0.49, 'y': 0.28, 'what': 0.08, '': 0.04, '\\(': 0.04}	4335	2.18861e-08	0.490234	0.956802	original		0.03	FALSE	FALSE	FALSE	out-of-context	{}
Mathematics	math_division5	55 is to 11 as 70 is to	14	x	0.49	0	0	{'x': 0.49, 'y': 0.19, 'what': 0.14, '': 0.08, '\\(': 0.04}	687	4.45172e-07	0.488281	0.993154	original		0.03	FALSE	FALSE	FALSE	out-of-context	{}
Mathematics	math_division2	94 is to 47 as 64 is to	32	x	0.49	0	0	{'x': 0.49, 'y': 0.21, 'what': 0.11, '': 0.07, '\\(': 0.03}	5044	2.468e-08	0.486328	0.949737	original		0.03	FALSE	FALSE	FALSE	out-of-context	{}
Mathematics	math_division2	84 is to 42 as 28 is to	14	x	0.49	0	0	{'x': 0.49, 'y': 0.23, 'what': 0.14, '': 0.05, '\\(': 0.03}	1218	1.49943e-07	0.488281	0.987863	original		0.03	FALSE	FALSE	FALSE	out-of-context	{}
Mathematics	math_division2	88 is to 44 as 62 is to	31	x	0.49	0	0	{'x': 0.49, 'y': 0.16, 'what': 0.14, '': 0.12, '\\(': 0.03}	5206	2.59606e-08	0.486328	0.948123	original		0.03	FALSE	FALSE	FALSE	out-of-context	{}
Semantic Hierarchies	hypernyms_animals	feline is to cat as canine is to	wolf	dog	0.49	0	0	{'dog': 0.49, '____': 0.06, '"': 0.04, '______': 0.03, '_____': 0.03}	21	0.00506592	0.481262	0.999791	original		0.03	FALSE	FALSE	FALSE	out-of-context	{}
Mathematics	math_double	18 is to 36 as 8 is to	16	x	0.48	0	0	{'x': 0.48, 'what': 0.32, 'y': 0.09, '': 0.06, 'X': 0.01}	178	2.42889e-06	0.478513	0.998226	original		0.03	FALSE	FALSE	FALSE	out-of-context	{}
Mathematics	math_double	82 is to 164 as 28 is to	56	x	0.48	0	0	{'x': 0.48, 'what': 0.26, '': 0.11, 'y': 0.07, 'X': 0.03}	1759	1.0943e-07	0.480469	0.982472	original		0.03	FALSE	FALSE	FALSE	out-of-context	{}
Mathematics	math_double	94 is to 188 as 65 is to	130	x	0.48	0	0	{'x': 0.48, 'what': 0.17, '': 0.15, 'y': 0.11, 'X': 0.03}	2444	6.65896e-08	0.480469	0.975646	original		0.03	FALSE	FALSE	FALSE	out-of-context	{}
Mathematics	math_double	76 is to 152 as 65 is to	130	x	0.48	0	0	{'x': 0.48, 'what': 0.21, 'y': 0.12, '': 0.1, 'X': 0.02}	1958	8.5216e-08	0.476562	0.980489	original		0.03	FALSE	FALSE	FALSE	out-of-context	{}
Mathematics	math_double	68 is to 136 as 74 is to	148	x	0.48	0	0	{'x': 0.48, 'what': 0.21, 'y': 0.13, '': 0.1, 'X': 0.02}	7423	1.07102e-08	0.478516	0.92603	original		0.03	FALSE	FALSE	FALSE	out-of-context	{}
Mathematics	math_division2	32 is to 16 as 28 is to	14	x	0.48	0	0	{'x': 0.48, 'what': 0.22, 'y': 0.12, '': 0.06, 'X': 0.04}	1019	2.92435e-07	0.482422	0.989846	original		0.03	FALSE	FALSE	FALSE	out-of-context	{}
Mathematics	math_division2	56 is to 28 as 32 is to	16	x	0.48	0	0	{'x': 0.48, 'y': 0.2, 'what': 0.16, '': 0.08, '\\(': 0.02}	402	6.33299e-07	0.476562	0.995994	original		0.03	FALSE	FALSE	FALSE	out-of-context	{}
Mathematics	math_division2	42 is to 21 as 28 is to	14	x	0.48	0	0	{'x': 0.48, 'y': 0.21, 'what': 0.15, '': 0.05, '\\(': 0.04}	915	1.96509e-07	0.478515	0.990882	original		0.03	FALSE	FALSE	FALSE	out-of-context	{}
Mathematics	math_division2	46 is to 23 as 32 is to	16	x	0.48	0	0	{'x': 0.48, 'y': 0.24, 'what': 0.11, '': 0.06, '\\(': 0.04}	373	7.33882e-07	0.476562	0.996283	original		0.03	FALSE	FALSE	FALSE	out-of-context	{}
Mathematics	math_division2	94 is to 47 as 62 is to	31	x	0.48	0	0	{'x': 0.48, 'y': 0.18, 'what': 0.12, '': 0.1, 'X': 0.03}	5711	1.75787e-08	0.478516	0.94309	original		0.03	FALSE	FALSE	FALSE	out-of-context	{}
Mathematics	math_division2	92 is to 46 as 94 is to	47	x	0.48	0	0	{'x': 0.48, 'y': 0.21, 'what': 0.15, '': 0.05, 'Y': 0.03}	1810	1.24797e-07	0.480469	0.981963	original		0.03	FALSE	FALSE	FALSE	out-of-context	{}
Mathematics	math_division2	98 is to 49 as 28 is to	14	x	0.48	0	0	{'x': 0.48, 'y': 0.17, 'what': 0.14, '': 0.08, 'X': 0.03}	1314	2.5332e-07	0.480468	0.986906	original		0.03	FALSE	FALSE	FALSE	out-of-context	{}
Mathematics	math_double	2 is to 4 as 74 is to	148	x	0.48	0	0	{'x': 0.48, '': 0.17, 'what': 0.11, 'X': 0.08, 'y': 0.08}	11589	1.0652e-08	0.482422	0.884517	original		0.03	FALSE	FALSE	FALSE	out-of-context	{}
Mathematics	math_division2	68 is to 34 as 94 is to	47	x	0.48	0	0	{'x': 0.48, 'y': 0.19, 'what': 0.14, '': 0.09, 'X': 0.03}	1553	1.02445e-07	0.476562	0.984524	original		0.03	FALSE	FALSE	FALSE	out-of-context	{}
Mathematics	math_division2	88 is to 44 as 32 is to	16	x	0.48	0	0	{'x': 0.48, 'y': 0.19, 'what': 0.12, '': 0.1, '\\(': 0.03}	269	2.23517e-06	0.48242	0.997319	original		0.03	FALSE	FALSE	FALSE	out-of-context	{}
Mathematics	math_double	38 is to 76 as 65 is to	130	x	0.47	0	0	{'x': 0.47, 'y': 0.18, 'what': 0.11, '': 0.09, 'X': 0.04}	4060	3.51574e-08	0.46875	0.959542	original		0.03	FALSE	FALSE	FALSE	out-of-context	{}
Mathematics	math_double	28 is to 56 as 65 is to	130	x	0.47	0	0	{'x': 0.47, 'what': 0.2, 'y': 0.15, '': 0.07, 'X': 0.05}	3046	4.35393e-08	0.474609	0.969647	original		0.03	FALSE	FALSE	FALSE	out-of-context	{}
Mathematics	math_double	96 is to 192 as 98 is to	196	x	0.47	0	0	{'x': 0.47, 'what': 0.24, 'y': 0.14, '': 0.06, '\\(': 0.03}	5387	1.53668e-08	0.470703	0.946319	original		0.03	FALSE	FALSE	FALSE	out-of-context	{}
Mathematics	math_division2	94 is to 47 as 32 is to	16	x	0.47	0	0	{'x': 0.47, 'y': 0.2, 'what': 0.12, '': 0.09, '\\(': 0.03}	490	7.45058e-07	0.474609	0.995117	original		0.03	FALSE	FALSE	FALSE	out-of-context	{}
Mathematics	math_division2	88 is to 44 as 64 is to	32	x	0.47	0	0	{'x': 0.47, 'y': 0.17, 'what': 0.15, '': 0.09, '\\(': 0.03}	3153	6.42613e-08	0.472656	0.968581	original		0.03	FALSE	FALSE	FALSE	out-of-context	{}
Mathematics	math_division2	78 is to 39 as 32 is to	16	x	0.47	0	0	{'x': 0.47, 'y': 0.19, 'what': 0.14, '': 0.1, 'X': 0.02}	465	8.27014e-07	0.470702	0.995366	original		0.03	FALSE	FALSE	FALSE	out-of-context	{}
Mathematics	math_double	46 is to 92 as 16 is to	32	x	0.46	0	0	{'x': 0.46, 'what': 0.22, 'y': 0.13, '': 0.1, '\\(': 0.02}	2114	7.91624e-08	0.458984	0.978934	original		0.03	FALSE	FALSE	FALSE	out-of-context	{}
Mathematics	math_double	16 is to 32 as 8 is to	16	what	0.46	0	0	{'what': 0.46, 'x': 0.3, '': 0.08, 'y': 0.07, 'X': 0.02}	161	6.85453e-06	0.464837	0.998396	original		0.03	FALSE	FALSE	FALSE	out-of-context	{}
Mathematics	math_double	82 is to 164 as 65 is to	130	x	0.46	0	0	{'x': 0.46, 'what': 0.21, '': 0.17, 'y': 0.07, 'X': 0.03}	1926	1.23866e-07	0.460937	0.980808	original		0.03	FALSE	FALSE	FALSE	out-of-context	{}
Mathematics	math_double	96 is to 192 as 84 is to	168	x	0.46	0	0	{'x': 0.46, 'what': 0.24, 'y': 0.12, '': 0.08, '\\(': 0.03}	6940	9.77889e-09	0.457031	0.930843	original		0.03	FALSE	FALSE	FALSE	out-of-context	{}
Mathematics	math_double	55 is to 110 as 74 is to	148	x	0.46	0	0	{'x': 0.46, 'what': 0.21, 'y': 0.19, '': 0.07, '\\(': 0.03}	7468	8.44011e-09	0.457031	0.925582	original		0.03	FALSE	FALSE	FALSE	out-of-context	{}
Mathematics	math_double	54 is to 108 as 84 is to	168	x	0.46	0	0	{'x': 0.46, 'what': 0.21, 'y': 0.16, '': 0.07, 'X': 0.03}	9157	4.51109e-09	0.462891	0.908751	original		0.03	FALSE	FALSE	FALSE	out-of-context	{}
Mathematics	math_double	58 is to 116 as 84 is to	168	x	0.46	0	0	{'x': 0.46, 'y': 0.21, 'what': 0.21, '': 0.06, 'Y': 0.02}	12538	3.25963e-09	0.457031	0.87506	original		0.03	FALSE	FALSE	FALSE	out-of-context	{}
Mathematics	math_double	56 is to 112 as 98 is to	196	x	0.46	0	0	{'x': 0.46, 'what': 0.19, 'y': 0.13, '': 0.12, 'X': 0.03}	7215	9.37143e-09	0.458984	0.928103	original		0.03	FALSE	FALSE	FALSE	out-of-context	{}
Mathematics	math_double	76 is to 152 as 84 is to	168	x	0.46	0	0	{'x': 0.46, 'what': 0.23, 'y': 0.19, '': 0.05, '\\(': 0.02}	9233	5.84987e-09	0.458984	0.907994	original		0.03	FALSE	FALSE	FALSE	out-of-context	{}
Mathematics	math_double	68 is to 136 as 65 is to	130	x	0.46	0	0	{'x': 0.46, 'what': 0.18, '': 0.14, 'y': 0.11, 'X': 0.03}	1888	1.25729e-07	0.464844	0.981186	original		0.03	FALSE	FALSE	FALSE	out-of-context	{}
Mathematics	math_division2	52 is to 26 as 28 is to	14	x	0.46	0	0	{'x': 0.46, 'y': 0.19, 'what': 0.17, '': 0.05, 'X': 0.04}	938	2.49594e-07	0.464844	0.990653	original		0.03	FALSE	FALSE	FALSE	out-of-context	{}
Mathematics	math_division2	52 is to 26 as 62 is to	31	x	0.46	0	0	{'x': 0.46, 'y': 0.17, 'what': 0.15, '': 0.09, 'X': 0.04}	3091	5.6345e-08	0.457031	0.969198	original		0.03	FALSE	FALSE	FALSE	out-of-context	{}
Mathematics	math_division2	56 is to 28 as 62 is to	31	x	0.46	0	0	{'x': 0.46, 'y': 0.19, 'what': 0.14, '': 0.11, 'X': 0.02}	4133	2.45636e-08	0.460937	0.958815	original		0.03	FALSE	FALSE	FALSE	out-of-context	{}
Mathematics	math_division2	54 is to 27 as 32 is to	16	x	0.46	0	0	{'x': 0.46, 'y': 0.2, 'what': 0.14, '': 0.09, '\\(': 0.03}	455	6.66827e-07	0.46289	0.995466	original		0.03	FALSE	FALSE	FALSE	out-of-context	{}
Mathematics	math_division2	42 is to 21 as 32 is to	16	x	0.46	0	0	{'x': 0.46, 'y': 0.22, 'what': 0.13, '': 0.06, '\\(': 0.04}	543	5.73695e-07	0.458984	0.994589	original		0.03	FALSE	FALSE	FALSE	out-of-context	{}
Mathematics	math_division2	44 is to 22 as 64 is to	32	x	0.46	0	0	{'x': 0.46, 'y': 0.23, 'what': 0.15, '': 0.06, '\\(': 0.03}	3941	3.70201e-08	0.457031	0.960728	original		0.03	FALSE	FALSE	FALSE	out-of-context	{}
Mathematics	math_division2	44 is to 22 as 94 is to	47	x	0.46	0	0	{'x': 0.46, 'what': 0.21, 'y': 0.14, '': 0.1, '\\(': 0.03}	2412	6.98492e-08	0.455078	0.975965	original		0.03	FALSE	FALSE	FALSE	out-of-context	{}
Mathematics	math_division2	98 is to 49 as 94 is to	47	x	0.46	0	0	{'x': 0.46, 'y': 0.18, 'what': 0.17, '': 0.07, '\\(': 0.03}	2448	7.91624e-08	0.455078	0.975606	original		0.03	FALSE	FALSE	FALSE	out-of-context	{}
Mathematics	math_division2	98 is to 49 as 64 is to	32	x	0.46	0	0	{'x': 0.46, 'y': 0.19, 'what': 0.13, '': 0.09, 'X': 0.03}	4534	3.70201e-08	0.457031	0.954819	original		0.03	FALSE	FALSE	FALSE	out-of-context	{}
Mathematics	math_division2	74 is to 37 as 64 is to	32	x	0.46	0	0	{'x': 0.46, 'y': 0.2, 'what': 0.14, '': 0.06, 'X': 0.04}	4967	2.5495e-08	0.464844	0.950504	original		0.03	FALSE	FALSE	FALSE	out-of-context	{}
Mathematics	math_division2	74 is to 37 as 62 is to	31	x	0.46	0	0	{'x': 0.46, 'y': 0.17, 'what': 0.15, '': 0.1, 'X': 0.04}	5447	1.81608e-08	0.457031	0.945721	original		0.03	FALSE	FALSE	FALSE	out-of-context	{}
Mathematics	math_division2	74 is to 37 as 32 is to	16	x	0.46	0	0	{'x': 0.46, 'y': 0.17, 'what': 0.15, '': 0.09, 'X': 0.03}	457	7.56234e-07	0.464843	0.995446	original		0.03	FALSE	FALSE	FALSE	out-of-context	{}
Mathematics	math_division2	62 is to 31 as 94 is to	47	x	0.46	0	0	{'x': 0.46, 'y': 0.25, 'what': 0.14, '': 0.06, 'Y': 0.03}	1706	5.84405e-08	0.458984	0.983	original		0.03	FALSE	FALSE	FALSE	out-of-context	{}
Mathematics	math_division2	82 is to 41 as 32 is to	16	x	0.46	0	0	{'x': 0.46, 'y': 0.22, 'what': 0.12, '': 0.09, '\\(': 0.03}	353	1.24425e-06	0.462889	0.996482	original		0.03	FALSE	FALSE	FALSE	out-of-context	{}
Mathematics	math_double	38 is to 76 as 84 is to	168	x	0.45	0	0	{'x': 0.45, 'y': 0.25, 'what': 0.14, '': 0.05, 'X': 0.03}	13999	3.43425e-09	0.451172	0.860501	original		0.03	FALSE	FALSE	FALSE	out-of-context	{}
Mathematics	math_double	28 is to 56 as 98 is to	196	x	0.45	0	0	{'x': 0.45, 'what': 0.23, 'y': 0.11, '': 0.08, 'X': 0.06}	5301	2.04891e-08	0.451172	0.947176	original		0.03	FALSE	FALSE	FALSE	out-of-context	{}
Mathematics	math_double	66 is to 132 as 84 is to	168	x	0.45	0	0	{'x': 0.45, 'what': 0.2, 'y': 0.18, '': 0.08, 'X': 0.02}	9069	5.79166e-09	0.453125	0.909628	original		0.03	FALSE	FALSE	FALSE	out-of-context	{}
Mathematics	math_division2	54 is to 27 as 62 is to	31	x	0.45	0	0	{'x': 0.45, 'y': 0.2, '': 0.11, 'what': 0.11, 'X': 0.04}	4628	2.42144e-08	0.451172	0.953882	original		0.03	FALSE	FALSE	FALSE	out-of-context	{}
Mathematics	math_division2	98 is to 49 as 32 is to	16	x	0.45	0	0	{'x': 0.45, 'y': 0.18, 'what': 0.14, '': 0.1, '\\(': 0.03}	454	1.16974e-06	0.451171	0.995476	original		0.03	FALSE	FALSE	FALSE	out-of-context	{}
Mathematics	math_division2	76 is to 38 as 64 is to	32	x	0.45	0	0	{'x': 0.45, 'y': 0.26, 'what': 0.15, '': 0.05, '\\(': 0.02}	4643	1.96742e-08	0.451172	0.953733	original		0.03	FALSE	FALSE	FALSE	out-of-context	{}
Mathematics	math_double	42 is to 84 as 74 is to	148	x	0.44	0	0	{'x': 0.44, 'what': 0.22, 'y': 0.14, '': 0.09, '\\(': 0.04}	10272	5.58794e-09	0.443359	0.89764	original		0.03	FALSE	FALSE	FALSE	out-of-context	{}
Mathematics	math_double	46 is to 92 as 65 is to	130	x	0.44	0	0	{'x': 0.44, 'what': 0.21, 'y': 0.17, '': 0.08, '\\(': 0.04}	2750	4.72646e-08	0.443359	0.972596	original		0.03	FALSE	FALSE	FALSE	out-of-context	{}
Mathematics	math_double	10 is to 20 as 98 is to	196	x	0.44	0	0	{'x': 0.44, 'what': 0.16, '': 0.16, 'y': 0.1, 'X': 0.06}	11676	4.51109e-09	0.443359	0.88365	original		0.03	FALSE	FALSE	FALSE	out-of-context	{}
Mathematics	math_squares	28 is to 784 as 4 is to	16	x	0.44	0	0	{'x': 0.44, '': 0.2, 'what': 0.14, 'X': 0.06, 'y': 0.03}	272	5.39422e-06	0.441401	0.99729	original		0.03	FALSE	FALSE	FALSE	out-of-context	{}
Mathematics	math_division2	92 is to 46 as 64 is to	32	x	0.44	0	0	{'x': 0.44, 'y': 0.19, 'what': 0.18, '': 0.08, '\\(': 0.03}	4031	3.42261e-08	0.4375	0.959831	original		0.03	FALSE	FALSE	FALSE	out-of-context	{}
Mathematics	math_division2	76 is to 38 as 32 is to	16	x	0.44	0	0	{'x': 0.44, 'y': 0.26, 'what': 0.15, '': 0.06, '\\(': 0.02}	481	5.06639e-07	0.439453	0.995207	original		0.03	FALSE	FALSE	FALSE	out-of-context	{}
Mathematics	math_double	32 is to 64 as 98 is to	196	x	0.43	0	0	{'x': 0.43, 'what': 0.23, '': 0.1, 'y': 0.09, 'X': 0.06}	9148	1.2049e-08	0.431641	0.908841	original		0.03	FALSE	FALSE	FALSE	out-of-context	{}
Mathematics	math_double	48 is to 96 as 98 is to	196	x	0.43	0	0	{'x': 0.43, 'what': 0.22, 'y': 0.14, '': 0.1, 'X': 0.03}	12836	5.38421e-09	0.425781	0.87209	original		0.03	FALSE	FALSE	FALSE	out-of-context	{}
Mathematics	math_double	44 is to 88 as 65 is to	130	x	0.43	0	0	{'x': 0.43, 'y': 0.17, 'what': 0.16, '': 0.12, 'X': 0.03}	3022	5.79748e-08	0.433594	0.969886	original		0.03	FALSE	FALSE	FALSE	out-of-context	{}
Mathematics	math_double	92 is to 184 as 65 is to	130	x	0.43	0	0	{'x': 0.43, 'what': 0.25, '': 0.12, 'y': 0.12, 'X': 0.02}	2118	6.98492e-08	0.431641	0.978894	original		0.03	FALSE	FALSE	FALSE	out-of-context	{}
Mathematics	math_division2	64 is to 32 as 28 is to	14	x	0.43	0	0	{'x': 0.43, 'what': 0.21, 'y': 0.12, '': 0.08, 'X': 0.06}	1278	3.241e-07	0.427734	0.987265	original		0.03	FALSE	FALSE	FALSE	out-of-context	{}
Mathematics	math_double	32 is to 64 as 74 is to	148	x	0.42	0	0	{'x': 0.42, 'what': 0.27, '': 0.09, 'y': 0.08, 'X': 0.06}	10918	1.01863e-08	0.419922	0.891203	original		0.03	FALSE	FALSE	FALSE	out-of-context	{}
Mathematics	math_double	88 is to 176 as 98 is to	196	x	0.42	0	0	{'x': 0.42, 'what': 0.23, 'y': 0.15, '': 0.13, '\\(': 0.01}	4950	2.43308e-08	0.419922	0.950674	original		0.03	FALSE	FALSE	FALSE	out-of-context	{}
Mathematics	math_double	98 is to 196 as 65 is to	130	x	0.42	0	0	{'x': 0.42, 'what': 0.18, '': 0.15, 'y': 0.12, 'X': 0.03}	3495	4.79631e-08	0.416016	0.965173	original		0.03	FALSE	FALSE	FALSE	out-of-context	{}
Mathematics	math_squares	14 is to 196 as 4 is to	16	x	0.42	0	0	{'x': 0.42, '': 0.27, 'what': 0.18, 'X': 0.05, 'y': 0.02}	1011	3.57628e-07	0.416015	0.989925	original		0.03	FALSE	FALSE	FALSE	out-of-context	{}
Mathematics	math_squares	2 is to 4 as 4 is to	16		0.42	0	0	{'': 0.42, 'x': 0.27, 'what': 0.07, 'X': 0.06, 'y': 0.05}	442	3.75509e-06	0.419918	0.995596	original		0.03	FALSE	FALSE	FALSE	out-of-context	{}
Mathematics	math_division2	62 is to 31 as 64 is to	32	x	0.42	0	0	{'x': 0.42, 'y': 0.29, 'what': 0.13, '': 0.04, 'Y': 0.04}	4283	2.85218e-08	0.417969	0.95732	original		0.03	FALSE	FALSE	FALSE	out-of-context	{}
Mathematics	math_division2	76 is to 38 as 62 is to	31	x	0.42	0	0	{'x': 0.42, 'y': 0.26, 'what': 0.16, '': 0.07, '\\(': 0.02}	5591	1.29803e-08	0.419922	0.944286	original		0.03	FALSE	FALSE	FALSE	out-of-context	{}
Mathematics	math_double	38 is to 76 as 74 is to	148	x	0.41	0	0	{'x': 0.41, 'y': 0.24, 'what': 0.17, '': 0.06, '\\(': 0.03}	10055	7.45058e-09	0.412109	0.899803	original		0.03	FALSE	FALSE	FALSE	out-of-context	{}
Mathematics	math_double	98 is to 196 as 8 is to	16	x	0.41	0	0	{'x': 0.41, 'what': 0.25, '': 0.23, 'y': 0.03, 'X': 0.02}	231	3.32296e-06	0.4082	0.997698	original		0.03	FALSE	FALSE	FALSE	out-of-context	{}
Mathematics	math_division2	54 is to 27 as 28 is to	14	x	0.41	0	0	{'x': 0.41, 'y': 0.19, 'what': 0.17, '': 0.1, 'X': 0.03}	961	2.44007e-07	0.414062	0.990424	original		0.03	FALSE	FALSE	FALSE	out-of-context	{}
Mathematics	math_division2	44 is to 22 as 28 is to	14	x	0.41	0	0	{'x': 0.41, 'what': 0.24, 'y': 0.18, '': 0.07, '\\(': 0.03}	923	2.75671e-07	0.412109	0.990802	original		0.03	FALSE	FALSE	FALSE	out-of-context	{}
Mathematics	math_division2	92 is to 46 as 62 is to	31	x	0.41	0	0	{'x': 0.41, 'what': 0.2, 'y': 0.16, '': 0.12, '\\(': 0.03}	5046	2.35159e-08	0.410156	0.949717	original		0.03	FALSE	FALSE	FALSE	out-of-context	{}
Verbal & Grammatical Forms	verb_inf_3pSg	creates is to create as follows is to	follow	create	0.41	0	0	{'create': 0.41, 'do': 0.04, 'use': 0.04, 'think': 0.03, 'be': 0.02}	49	0.00174713	0.412315	0.999512	original		0.03	FALSE	FALSE	FALSE	out-of-context	{}
Mathematics	math_double	32 is to 64 as 65 is to	130	x	0.4	0	0	{'x': 0.4, 'what': 0.16, 'y': 0.15, '': 0.09, 'X': 0.07}	3350	7.40401e-08	0.400391	0.966618	original		0.03	FALSE	FALSE	FALSE	out-of-context	{}
Mathematics	math_double	34 is to 68 as 74 is to	148	y	0.4	0	0	{'y': 0.4, 'x': 0.34, 'what': 0.11, '\\(': 0.04, '': 0.03}	8448	1.30385e-08	0.404297	0.915816	original		0.03	FALSE	FALSE	FALSE	out-of-context	{}
Mathematics	math_double	16 is to 32 as 65 is to	130	x	0.4	0	0	{'x': 0.4, 'what': 0.21, '': 0.13, 'y': 0.1, 'X': 0.07}	3242	5.26197e-08	0.396484	0.967694	original		0.03	FALSE	FALSE	FALSE	out-of-context	{}
Mathematics	math_double	82 is to 164 as 98 is to	196	x	0.4	0	0	{'x': 0.4, 'what': 0.29, '': 0.13, 'y': 0.1, 'X': 0.02}	5007	2.65427e-08	0.396484	0.950106	original		0.03	FALSE	FALSE	FALSE	out-of-context	{}
Mathematics	math_division2	66 is to 33 as 62 is to	31	x	0.4	0	0	{'x': 0.4, 'what': 0.2, 'y': 0.18, '': 0.08, 'X': 0.03}	4838	4.61005e-08	0.396484	0.95179	original		0.03	FALSE	FALSE	FALSE	out-of-context	{}
Mathematics	math_division2	58 is to 29 as 94 is to	47	x	0.4	0	0	{'x': 0.4, 'y': 0.27, 'what': 0.19, '': 0.06, 'Y': 0.02}	1999	5.4948e-08	0.396484	0.98008	original		0.03	FALSE	FALSE	FALSE	out-of-context	{}
Mathematics	math_double	34 is to 68 as 28 is to	56	x	0.39	0	0	{'x': 0.39, 'y': 0.32, 'what': 0.15, '': 0.03, '\\(': 0.03}	1560	1.52737e-07	0.394531	0.984455	original		0.03	FALSE	FALSE	FALSE	out-of-context	{}
Mathematics	math_double	34 is to 68 as 65 is to	130	x	0.39	0	0	{'x': 0.39, 'y': 0.38, 'what': 0.07, '': 0.04, '\\(': 0.03}	6686	2.14204e-08	0.388672	0.933375	original		0.03	FALSE	FALSE	FALSE	out-of-context	{}
Mathematics	math_division2	66 is to 33 as 32 is to	16	x	0.39	0	0	{'x': 0.39, 'what': 0.21, 'y': 0.18, '': 0.11, 'X': 0.03}	423	1.40071e-06	0.38867	0.995785	original		0.03	FALSE	FALSE	FALSE	out-of-context	{}
Mathematics	math_double	88 is to 176 as 84 is to	168	x	0.38	0	0	{'x': 0.38, 'what': 0.28, 'y': 0.17, '': 0.09, '\\(': 0.02}	6981	1.73459e-08	0.384766	0.930435	original		0.03	FALSE	FALSE	FALSE	out-of-context	{}
Mathematics	math_division2	68 is to 34 as 32 is to	16	x	0.38	0	0	{'x': 0.38, 'y': 0.19, 'what': 0.17, '': 0.14, 'X': 0.03}	323	1.77324e-06	0.378904	0.996781	original		0.03	FALSE	FALSE	FALSE	out-of-context	{}
Mathematics	math_division2	62 is to 31 as 28 is to	14	x	0.38	0	0	{'x': 0.38, 'y': 0.24, 'what': 0.21, '': 0.06, '\\(': 0.03}	817	2.75671e-07	0.376953	0.991859	original		0.03	FALSE	FALSE	FALSE	out-of-context	{}
Mathematics	math_double	10 is to 20 as 8 is to	16	what	0.37	0	0	{'what': 0.37, 'x': 0.33, 'y': 0.12, '': 0.11, 'X': 0.02}	238	2.20537e-06	0.373045	0.997628	original		0.03	FALSE	FALSE	FALSE	out-of-context	{}
Mathematics	math_double	92 is to 184 as 74 is to	148	what	0.37	0	0	{'what': 0.37, 'x': 0.36, 'y': 0.12, '': 0.09, 'X': 0.01}	7619	8.73115e-09	0.367187	0.924077	original		0.03	FALSE	FALSE	FALSE	out-of-context	{}
Mathematics	math_division2	58 is to 29 as 64 is to	32	x	0.36	0	0	{'x': 0.36, 'y': 0.33, 'what': 0.15, '': 0.05, 'Y': 0.03}	4391	3.0268e-08	0.361328	0.956244	original		0.03	FALSE	FALSE	FALSE	out-of-context	{}
Semantic Hierarchies	hyponyms_misc	camcorder is to camera as diamond is to	jewel	coal	0.36	0	0	{'coal': 0.36, 'diamond': 0.08, 'carbon': 0.07, 'rock': 0.05, 'gem': 0.03}	6	0.0147095	0.342712	0.99994	original		0.03	FALSE	FALSE	FALSE	out-of-context	{}
Mathematics	math_division2	58 is to 29 as 32 is to	16	x	0.35	0	0	{'x': 0.35, 'y': 0.25, 'what': 0.2, '': 0.1, 'Y': 0.02}	429	8.86619e-07	0.351562	0.995725	original		0.03	FALSE	FALSE	FALSE	out-of-context	{}
Factual Knowledge	capital_world	Paramaribo is to Suriname as Antananarivo is to	madagascar	what	0.32	0	0	{'what': 0.32, '?': 0.07, '': 0.09, ':': 0.03}	7	0.0168457	0.299561	0.99993	original		0.03	FALSE	FALSE	FALSE	out-of-context	{}
Factual Knowledge	capital_world	Bujumbura is to Burundi as Dakar is to	senegal		0.32	0	0	{'': 0.02, 'what': 0.26, 'which': 0.16, '?': 0.05}	26	0.00198364	0.314423	0.999741	original		0.03	FALSE	FALSE	FALSE	out-of-context	{}
Mathematics	math_double	64 is to 128 as 65 is to	130	x	0.32	0	0	{'x': 0.32, '': 0.19, 'what': 0.17, 'y': 0.09, 'X': 0.07}	226	8.40425e-06	0.318351	0.997748	original		0.03	FALSE	FALSE	FALSE	out-of-context	{}
Mathematics	math_division2	58 is to 29 as 28 is to	14	x	0.32	0	0	{'x': 0.32, 'what': 0.23, 'y': 0.23, '': 0.1, 'Y': 0.03}	1101	2.8871e-07	0.322265	0.989029	original		0.03	FALSE	FALSE	FALSE	out-of-context	{}
Mathematics	math_division2	62 is to 31 as 32 is to	16	x	0.32	0	0	{'x': 0.32, 'y': 0.26, 'what': 0.19, '': 0.1, 'Y': 0.04}	435	9.83477e-07	0.324218	0.995665	original		0.03	FALSE	FALSE	FALSE	out-of-context	{}
Factual Knowledge	capital_world	Botswana is to Gaborone as Bahrain is to	manama	?	0.3	0	0	{'?': 0.18, '': 0.04, 'what': 0.03}	185	8.82149e-05	0.300693	0.998156	original		0.03	FALSE	FALSE	FALSE	out-of-context	{}
Mathematics	math_double	66 is to 132 as 65 is to	130	x	0.3	0	0	{'x': 0.3, 'what': 0.26, '': 0.19, 'y': 0.12, 'X': 0.03}	612	1.05798e-06	0.30078	0.993901	original		0.03	FALSE	FALSE	FALSE	out-of-context	{}
Factual Knowledge	UK_city_county	chester is to cheshire as stirling is to	stirlingshire	?	0.29	0	0	{'?': 0.04, '': 0.09, 'what': 0.04}	187	0.000171661	0.292797	0.998137	original		0.03	FALSE	FALSE	FALSE	out-of-context	{}
Semantic Hierarchies	hypernyms_misc	clothes is to jacket as toiletry is to	perfume		0.27	0	0	{'': 0.07, '?': 0.04, ':': 0.03}	997	9.0003e-06	0.273428	0.990065	original		0.03	FALSE	FALSE	FALSE	out-of-context	{}
Semantic Hierarchies	hypernyms_misc	chair is to armchair as appliance is to	toaster	?	0.27	0	0	{'?': 0.05, '': 0.09, 'what': 0.05, 'appliance': 0.05}	36	0.00323486	0.26239	0.999641	original		0.03	FALSE	FALSE	FALSE	out-of-context	{}
Semantic Relations	animal_sound	cicada is to buzz as wasp is to	buzz	sting	0.26	0	0	{'sting': 0.26, '______': 0.06, '': 0.05, '__': 0.04, 'what': 0.03}	13	0.0183105	0.241455	0.99987	original		0.03	FALSE	FALSE	FALSE	out-of-context	{}
Factual Knowledge	UK_city_county	hereford is to herefordshire as stirling is to	stirlingshire	?	0.25	0	0	{'?': 0.06, '': 0.1, 'sc': 0.05}	41	0.00169373	0.243423	0.999591	original		0.03	FALSE	FALSE	FALSE	out-of-context	{}
Factual Knowledge	name_occupation	euler is to mathematician as pascal is to	mathematician	programmer	0.25	0	0	{'programmer': 0.25, 'computer': 0.14, 'philosopher': 0.05, 'scientist': 0.04, 'inventor': 0.03}	14	0.00952148	0.244385	0.99986	original		0.03	FALSE	FALSE	FALSE	out-of-context	{}
Semantic Hierarchies	hypernyms_misc	clothes is to skirt as appliance is to	toaster		0.25	0	0	{'': 0.11, '?': 0.07, ':': 0.04}	54	0.00113678	0.252769	0.999462	original		0.03	FALSE	FALSE	FALSE	out-of-context	{}
Verbal & Grammatical Forms	adjective_to_adverb	amazing is to amazingly as occasional is to	occasionally	?	0.24	0	0	{'?': 0.09, '': 0.06, ':': 0.04}	70	0.000991821	0.23436	0.999302	original		0.03	FALSE	FALSE	FALSE	out-of-context	{}
Factual Knowledge	capital_world	Rome is to Italy as Antananarivo is to	madagascar	what	0.23	0	0	{'what': 0.23, '?': 0.09, 'which': 0.05, '?"': 0.03}	13	0.0179443	0.207642	0.99987	original		0.03	FALSE	FALSE	FALSE	out-of-context	{}
Semantic Hierarchies	hypernyms_misc	chair is to armchair as toiletry is to	perfume	?	0.22	0	0	{'?': 0.05, '': 0.12, '"': 0.04, ':': 0.04}	657	2.6226e-05	0.217747	0.993453	original		0.03	FALSE	FALSE	FALSE	out-of-context	{}
Verbal & Grammatical Forms	plural	pears is to pear as buildings is to	building	?	0.22	0	0	{'?': 0.05, '': 0.06, 'what': 0.06, ':': 0.04}	19	0.00878906	0.209961	0.999811	original		0.03	FALSE	FALSE	FALSE	out-of-context	{}
Semantic Hierarchies	hypernyms_misc	furniture is to desk as clothes is to	shirt	closet	0.21	0	0	{'closet': 0.21, 'wardrobe': 0.06, '?': 0.05, 'suitcase': 0.04, 'what': 0.03}	8	0.0218506	0.185181	0.99992	original		0.03	FALSE	FALSE	FALSE	out-of-context	{}
Semantic Hierarchies	hypernyms_misc	furniture is to desk as clothes is to	skirt	closet	0.21	0	0	{'closet': 0.21, 'wardrobe': 0.06, '?': 0.05, 'suitcase': 0.04, 'what': 0.03}	245	0.000207901	0.206823	0.997559	original		0.03	FALSE	FALSE	FALSE	out-of-context	{}
Factual Knowledge	capital_world	Bujumbura is to Burundi as Kathmandu is to	nepal	what	0.2	0	0	{'what': 0.2, '?': 0.04, 'which': 0.1, ':': 0.09}	5	0.0383301	0.156982	0.99995	original		0.03	FALSE	FALSE	FALSE	out-of-context	{}
Morphological Modifiers	adj_comparative	rude is to ruder as tiny is to	tinier	?	0.2	0	0	{'?': 0.07, ':': 0.08, '': 0.04}	450	3.98159e-05	0.198202	0.995516	original		0.03	FALSE	FALSE	FALSE	out-of-context	{}
Verbal & Grammatical Forms	noun_plural_reg	cars is to car as villages is to	village	?	0.19	0	0	{'?': 0.19, ':': 0.04, '': 0.08, 'city': 0.04}	25	0.00793457	0.178589	0.999751	original		0.03	FALSE	FALSE	FALSE	out-of-context	{}
Semantic Hierarchies	hypernyms_misc	net is to hairnet as toiletry is to	perfume		0.18	0	0	{'': 0.08, '?': 0.04, ':': 0.08}	291	7.86781e-05	0.182539	0.9971	original		0.03	FALSE	FALSE	FALSE	out-of-context	{}
Semantic Relations	animal_shelter	lion is to den as seal is to	den		0.18	0	0	{'': 0.07, '?': 0.05, ':': 0.05}	241	0.000169754	0.180494	0.997598	original		0.03	FALSE	FALSE	FALSE	out-of-context	{}
Verbal & Grammatical Forms	plural	goats is to goat as birds is to	bird	______	0.18	0	0	{'______': 0.18, '_____': 0.04, '': 0.04, '____': 0.04, 'a': 0.03}	66	0.00163269	0.180984	0.999342	original		0.03	FALSE	FALSE	FALSE	out-of-context	{}
Factual Knowledge	currency	Macedonia is to denar as Iran is to	rial	(	0.17	0	0	{'(': 0.17, '': 0.05, '?': 0.12}	5165	6.29574e-07	0.174804	0.948531	original		0.03	FALSE	FALSE	FALSE	out-of-context	{}
Verbal & Grammatical Forms	plural	donkeys is to donkey as birds is to	bird	______	0.17	0	0	{'______': 0.17, 'what': 0.06, '_____': 0.06, '____': 0.04, '__': 0.03}	9	0.0197754	0.14624	0.99991	original		0.03	FALSE	FALSE	FALSE	out-of-context	{}
Factual Knowledge	currency	Algeria is to dinar as Vietnam is to	dong	?	0.16	0	0	{'?': 0.16, '': 0.09, '"': 0.04}	40	0.00244141	0.158691	0.999601	original		0.03	FALSE	FALSE	FALSE	out-of-context	{}
Morphological Modifiers	over+adj_reg	heated is to overheated as shadowed is to	overshadowed		0.16	0	0	{'': 0.05, '?': 0.1, ':': 0.09}	102	0.000549316	0.156677	0.998984	original		0.03	FALSE	FALSE	FALSE	out-of-context	{}
Verbal & Grammatical Forms	plural	monkeys is to monkey as birds is to	bird	______	0.16	0	0	{'______': 0.16, 'what': 0.05, '_____': 0.04, '____': 0.04, 'a': 0.04}	14	0.0178223	0.140381	0.99986	original		0.03	FALSE	FALSE	FALSE	out-of-context	{}
Factual Knowledge	currency	Hungary is to forint as Latvia is to	lats	?	0.15	0	0	{'?': 0.15, 'euro': 0.1, 'what': 0.1, ':': 0.06, '______': 0.04}	20	0.00958252	0.139832	0.999801	original		0.03	FALSE	FALSE	FALSE	out-of-context	{}
Factual Knowledge	currency	Romania is to leu as Latvia is to	lats	?	0.15	0	0	{'?': 0.04, 'what': 0.09, ':': 0.08, '': 0.08}	31	0.00485229	0.146515	0.999691	original		0.03	FALSE	FALSE	FALSE	out-of-context	{}
Morphological Modifiers	over+adj_reg	laid is to overlaid as shadowed is to	overshadowed		0.15	0	0	{'': 0.08, ':': 0.13, '?': 0.07}	99	0.000383377	0.15196	0.999013	original		0.03	FALSE	FALSE	FALSE	out-of-context	{}
Verbal & Grammatical Forms	plural	colors is to color as birds is to	bird	feathers	0.15	0	0	{'feathers': 0.15, 'fly': 0.14, '______': 0.05, 'flying': 0.03, 'birds': 0.03}	67	0.00158691	0.14978	0.999332	original		0.03	FALSE	FALSE	FALSE	out-of-context	{}
Factual Knowledge	currency	Algeria is to dinar as Iran is to	rial	?	0.14	0	0	{'?': 0.14, '': 0.07, ':': 0.09}	8400	2.99886e-07	0.140625	0.916295	original		0.03	FALSE	FALSE	FALSE	out-of-context	{}
Semantic Hierarchies	hypernyms_misc	card is to postcard as appliance is to	toaster	?	0.14	0	0	{'?': 0.14, ':': 0.11, 'what': 0.08, '': 0.07, '"': 0.04}	95	0.000671387	0.135071	0.999053	original		0.03	FALSE	FALSE	FALSE	out-of-context	{}
Semantic Relations	animal_shelter	cockroach is to nest as mouse is to	nest	_____	0.14	0	0	{'_____': 0.14, 'bur': 0.11, '______': 0.1, '__': 0.08, '____': 0.04}	10	0.0174561	0.119263	0.9999	original		0.03	FALSE	FALSE	FALSE	related	{}
Factual Knowledge	currency	Argentina is to peso as Latvia is to	lats	:	0.13	0	0	{':': 0.04, '?': 0.11, 'what': 0.07}	64	0.00124359	0.133522	0.999362	original		0.03	FALSE	FALSE	FALSE	out-of-context	{}
Morphological Modifiers	verb+able_reg	identifiable is to identify as sustainable is to	sustain	be	0.13	0	0	{'be': 0.13, 'identify': 0.12, 'have': 0.03, 'not': 0.02, 'make': 0.02}	67	0.00218201	0.128677	0.999332	original		0.03	FALSE	FALSE	FALSE	out-of-context	{}
Morphological Modifiers	over+adj_reg	dressed is to overdressed as shadowed is to	overshadowed	?	0.13	0	0	{'?': 0.13, '': 0.06, ':': 0.07}	67	0.0013504	0.127556	0.999332	original		0.03	FALSE	FALSE	FALSE	out-of-context	{}
Semantic Hierarchies	hypernyms_animals	fowl is to duck as fowl is to	goose	______	0.13	0	0	{'______': 0.13, '____': 0.07, '_____': 0.06, '': 0.06, 'what': 0.05}	27	0.00592041	0.123962	0.999731	original		0.03	FALSE	FALSE	FALSE	out-of-context	{}
Verbal & Grammatical Forms	verb_Ving_3pSg	applies is to applying as follows is to	following	apply	0.13	0	0	{'apply': 0.13, 'applying': 0.1, 'the': 0.06, 'be': 0.02, '': 0.02}	51	0.00189209	0.13092	0.999492	original		0.03	FALSE	FALSE	FALSE	out-of-context	{}
Verbal & Grammatical Forms	plural	hands is to hand as birds is to	bird	wings	0.13	0	0	{'wings': 0.13, 'feathers': 0.12, '______': 0.06, 'fly': 0.05, 'wing': 0.04}	42	0.00309753	0.128738	0.999581	original		0.03	FALSE	FALSE	FALSE	out-of-context	{}
Verbal & Grammatical Forms	present_participle	scream is to screaming as vanish is to	vanishing	?	0.13	0	0	{'?': 0.04, 'what': 0.05, ':': 0.05, '"': 0.04}	53	0.00273132	0.125198	0.999472	original		0.03	FALSE	FALSE	FALSE	out-of-context	{}
Factual Knowledge	currency	Algeria is to dinar as Latvia is to	lats	:	0.12	0	0	{':': 0.12, '?': 0.08, 'what': 0.07, '': 0.07}	129	0.000452042	0.124548	0.998715	original		0.03	FALSE	FALSE	FALSE	out-of-context	{}
Semantic Hierarchies	hypernyms_misc	pastry is to croissant as toiletry is to	perfume		0.12	0	0	{'': 0.07, '?': 0.04, '"': 0.05}	244	0.000139236	0.122908	0.997569	original		0.03	FALSE	FALSE	FALSE	out-of-context	{}
Semantic Hierarchies	hyponyms_misc	ferry is to boat as hamburger is to	burger	cow	0.12	0	0	{'cow': 0.12, ':': 0.04, '': 0.03}	16	0.0148315	0.109192	0.999841	original		0.03	FALSE	FALSE	FALSE	out-of-context	{}
Semantic Relations	animal_shelter	cricket is to nest as insect is to	nest	hive	0.12	0	0	{'hive': 0.12, 'fly': 0.1, 'insect': 0.04, '__': 0.02, '': 0.02}	13	0.0158691	0.10083	0.99987	original		0.03	FALSE	FALSE	FALSE	related	{}
Factual Knowledge	currency	Algeria is to dinar as India is to	rupee		0.11	0	0	{'': 0.1, '?': 0.11, ':': 0.09, '(': 0.05}	80	0.000881195	0.110935	0.999203	original		0.03	FALSE	FALSE	FALSE	out-of-context	{}
Factual Knowledge	name_nationality	aristotle is to Greek as euclid is to	greek	mathematics	0.11	0	0	{'mathematics': 0.11, 'math': 0.07, 'geometry': 0.05, 'Egyptian': 0.05, '': 0.05}	8	0.0172119	0.0950928	0.99992	original		0.03	FALSE	FALSE	FALSE	out-of-context	{}
Morphological Modifiers	adj_comparative	hardy is to hardier as tiny is to	tinier	?	0.11	0	0	{'?': 0.11, ':': 0.05, '': 0.07}	184	0.000232697	0.113049	0.998166	original		0.03	FALSE	FALSE	FALSE	out-of-context	{}
Morphological Modifiers	over+adj_reg	arching is to overarching as shadowed is to	overshadowed	?	0.11	0	0	{'?': 0.05, ':': 0.08, '______': 0.08, '': 0.06}	54	0.00179291	0.112465	0.999462	original		0.03	FALSE	FALSE	FALSE	out-of-context	{}
Verbal & Grammatical Forms	plural	lion is to lions as finger is to	fingers		0.11	0	0	{'': 0.11, 'hands': 0.08, '?': 0.07, ':': 0.05, '"': 0.04}	12	0.0192871	0.095459	0.99988	original		0.03	FALSE	FALSE	FALSE	out-of-context	{}
Factual Knowledge	currency	Macedonia is to denar as Latvia is to	lats		0.1	0	0	{'': 0.06, '?': 0.09, '(': 0.09, 'what': 0.06}	45	0.00227356	0.0944061	0.999552	original		0.03	FALSE	FALSE	FALSE	out-of-context	{}
Semantic Hierarchies	hypernyms_animals	bovid is to cow as dinosaur is to	velociraptor	bird	0.1	0	0	{'bird': 0.1, '______': 0.08, 'dinosaur': 0.06, 'lizard': 0.05, 'what': 0.05}	35	0.00473022	0.0992737	0.999651	original		0.03	FALSE	FALSE	FALSE	out-of-context	{}
Semantic Hierarchies	hypernyms_animals	canine is to fox as fowl is to	goose	______	0.1	0	0	{'______': 0.1, 'what': 0.07, '_____': 0.05, '____': 0.04, 'duck': 0.04}	10	0.0189209	0.0802002	0.9999	original		0.03	FALSE	FALSE	FALSE	out-of-context	{}
Semantic Hierarchies	hyponyms_misc	paperback is to book as diamond is to	jewel	diamond	0.1	0	0	{'diamond': 0.1, 'gem': 0.1, 'coal': 0.09, 'ring': 0.06, 'rock': 0.05}	6	0.0358887	0.0681152	0.99994	original		0.03	FALSE	FALSE	FALSE	out-of-context	{}
Semantic Relations	animal_shelter	cockroach is to nest as cricket is to	nest	______	0.1	0	0	{'______': 0.1, '__': 0.08, '_____': 0.08, '': 0.05, '____': 0.04}	24	0.00662231	0.0968933	0.999761	original		0.03	FALSE	FALSE	FALSE	out-of-context	{}
Verbal & Grammatical Forms	plural	pears is to pear as birds is to	bird	______	0.1	0	0	{'______': 0.1, '?': 0.06, 'what': 0.06, 'a': 0.05, '': 0.04}	32	0.00534058	0.0986633	0.999681	original		0.03	FALSE	FALSE	FALSE	out-of-context	{}
Factual Knowledge	name_occupation	kepler is to mathematician as pascal is to	mathematician	?	0.09	0	0	{'?': 0.09, '': 0.05, 'scientist': 0.04, 'what': 0.04, ':': 0.04}	13	0.0170898	0.0698242	0.99987	original		0.03	FALSE	FALSE	FALSE	out-of-context	{}
Morphological Modifiers	over+adj_reg	ambitious is to overambitious as shadowed is to	overshadowed	?	0.09	0	0	{'?': 0.09, '': 0.06, ':': 0.06, '______': 0.05}	30	0.00549316	0.0804443	0.999701	original		0.03	FALSE	FALSE	FALSE	out-of-context	{}
Semantic Hierarchies	hypernyms_animals	canine is to dog as fowl is to	goose	______	0.09	0	0	{'______': 0.09, 'what': 0.08, '_____': 0.05, '"': 0.05, 'chicken': 0.05}	47	0.00308228	0.0843201	0.999532	original		0.03	FALSE	FALSE	FALSE	out-of-context	{}
Semantic Hierarchies	hypernyms_animals	feline is to cat as fowl is to	turkey	______	0.09	0	0	{'______': 0.09, 'what': 0.06, '____': 0.06, '"': 0.06, '_____': 0.05}	58	0.00231934	0.0845947	0.999422	original		0.03	FALSE	FALSE	FALSE	out-of-context	{}
Semantic Hierarchies	hypernyms_animals	feline is to cat as fowl is to	goose	______	0.09	0	0	{'______': 0.09, 'what': 0.06, '____': 0.06, '"': 0.06, '_____': 0.05}	62	0.00210571	0.0848083	0.999382	original		0.03	FALSE	FALSE	FALSE	out-of-context	{}
Verbal & Grammatical Forms	plural	monkeys is to monkey as cars is to	car	______	0.09	0	0	{'______': 0.09, 'drive': 0.06, '': 0.05, 'what': 0.04, '__': 0.04}	21	0.0098877	0.0780029	0.999791	original		0.03	FALSE	FALSE	FALSE	out-of-context	{}
Morphological Modifiers	adj_comparative	strong is to stronger as tiny is to	tinier	?	0.08	0	0	{'?': 0.08, 'tiny': 0.08, '': 0.07, ':': 0.06, '______': 0.04}	91	0.00094223	0.0815773	0.999093	original		0.03	FALSE	FALSE	FALSE	out-of-context	{}
Semantic Hierarchies	hyponyms_misc	ukulele is to guitar as doll is to	toy	child	0.08	0	0	{'child': 0.08, 'baby': 0.07, '______': 0.05, 'doll': 0.05, '__': 0.05}	6	0.0366211	0.0458984	0.99994	original		0.03	FALSE	FALSE	FALSE	out-of-context	{}
Semantic Relations	antonyms_binary	descend is to climb as vacant is to	occupied	full	0.08	0	0	{'full': 0.08, '': 0.07, '______': 0.06, '__': 0.06, '____': 0.05}	11	0.0247803	0.0562744	0.99989	original		0.03	FALSE	FALSE	FALSE	out-of-context	{}
Semantic Hierarchies	hyponyms_misc	polo is to shirt as doll is to	toy		0.07	0	0	{'': 0.07, ':': 0.06, '?': 0.06, '______': 0.05, '____': 0.05}	6	0.0437012	0.0241699	0.99994	original		0.03	FALSE	FALSE	FALSE	out-of-context	{}
Semantic Hierarchies	hyponyms_misc	hamburger is to burger as limousine is to	car	what	0.07	0	0	{'what': 0.07, '______': 0.04, '"': 0.04, '_': 0.04, '': 0.04}	9	0.0246582	0.0441895	0.99991	original		0.03	FALSE	FALSE	FALSE	out-of-context	{}
Verbal & Grammatical Forms	adjective_to_adverb	professional is to professionally as rapid is to	rapidly	slow	0.07	0	0	{'slow': 0.07, '?': 0.06, '': 0.06, 'quick': 0.05, 'fast': 0.05}	44	0.00262451	0.0652466	0.999562	original		0.03	FALSE	FALSE	FALSE	out-of-context	{}
Verbal & Grammatical Forms	plural	goats is to goat as buildings is to	building	______	0.07	0	0	{'______': 0.07, '?': 0.07, '': 0.03, 'what': 0.03}	6	0.02771	0.0430908	0.99994	original		0.03	FALSE	FALSE	FALSE	out-of-context	{}
Semantic Hierarchies	hypernyms_animals	anaconda is to snake as chinchilla is to	rodent	______	0.06	0	0	{'______': 0.06, '': 0.04, '?': 0.05, 'what': 0.05}	11	0.02771	0.0308838	0.99989	original		0.03	FALSE	FALSE	FALSE	out-of-context	{}
Semantic Relations	nationality_adjective	Ukraine is to Ukrainian as Japan is to	japanese	Japanese	0.95	1	1	{'Japanese': 0.95, 'the': 0.01, 'N': 0.0, '______': 0.0, '__': 0.0}	0	0.945312	0	1	original		0.02	FALSE	FALSE	FALSE	out-of-context	{}
Semantic Relations	nationality_adjective	Korean is to Korea as German is to	germany	Germany	0.95	1	1	{'Germany': 0.95, 'Austria': 0.01, 'German': 0.01, 'Deutschland': 0.0, '______': 0.0}	0	0.945312	0	1	original		0.02	FALSE	FALSE	FALSE	out-of-context	{}
Semantic Relations	nationality_adjective	Slovakian is to Slovakia as Japanese is to	japan	Japan	0.92	1	1	{'Japan': 0.92, '______': 0.01, '_____': 0.01, 'what': 0.01, '__': 0.0}	0	0.917969	0	1	original		0.02	FALSE	FALSE	FALSE	out-of-context	{}
Semantic Relations	nationality_adjective	Chinese is to China as German is to	germany	Germany	0.91	1	1	{'Germany': 0.91, 'Austria': 0.02, 'Europe': 0.01, 'German': 0.01, 'the': 0.01}	0	0.910156	0	1	original		0.02	FALSE	FALSE	FALSE	out-of-context	{}
Semantic Relations	nationality_adjective	Malta is to Maltese as Japan is to	japanese	Japanese	0.88	1	1	{'Japanese': 0.88, 'the': 0.04, '______': 0.01, '__': 0.01, 'what': 0.0}	0	0.875	0	1	original		0.02	FALSE	FALSE	FALSE	out-of-context	{}
Semantic Relations	nationality_adjective	Iceland is to Icelandic as Japan is to	japanese	Japanese	0.87	1	1	{'Japanese': 0.87, '______': 0.03, '_____': 0.01, '__': 0.01, 'the': 0.01}	0	0.867188	0	1	original		0.02	FALSE	FALSE	FALSE	out-of-context	{}
Semantic Relations	nationality_adjective	Japanese is to Japan as German is to	germany	Germany	0.87	1	1	{'Germany': 0.87, 'Austria': 0.03, 'German': 0.01, 'Switzerland': 0.01, 'the': 0.01}	0	0.871094	0	1	original		0.02	FALSE	FALSE	FALSE	out-of-context	{}
Semantic Relations	nationality_adjective	Icelandic is to Iceland as German is to	germany	Germany	0.84	1	1	{'Germany': 0.84, 'Austria': 0.05, 'Switzerland': 0.01, 'the': 0.01, 'German': 0.01}	0	0.84375	0	1	original		0.02	FALSE	FALSE	FALSE	out-of-context	{}
Semantic Relations	nationality_adjective	Cambodia is to Cambodian as Japan is to	japanese	Japanese	0.83	1	1	{'Japanese': 0.83, '______': 0.03, 'the': 0.02, '__': 0.01, 'Japan': 0.01}	0	0.832031	0	1	original		0.02	FALSE	FALSE	FALSE	out-of-context	{}
Semantic Relations	nationality_adjective	Indian is to India as Japanese is to	japan	Japan	0.74	1	1	{'Japan': 0.74, '______': 0.02, '_____': 0.02, '?': 0.02, '____': 0.01}	0	0.738281	0	1	original		0.02	FALSE	FALSE	FALSE	out-of-context	{}
Semantic Relations	nationality_adjective	Bulgaria is to Bulgarian as Japan is to	japanese	Japanese	0.71	1	1	{'Japanese': 0.71, '______': 0.05, '_____': 0.02, '____': 0.02, '__': 0.02}	0	0.714844	0	1	original		0.02	FALSE	FALSE	FALSE	out-of-context	{}
Semantic Relations	nationality_adjective	French is to France as German is to	germany	Germany	0.66	1	1	{'Germany': 0.66, '______': 0.04, 'Austria': 0.02, '__': 0.02, 'A': 0.01}	0	0.660156	0	1	original		0.02	FALSE	FALSE	FALSE	out-of-context	{}
Semantic Hierarchies	hyponyms_misc	laptop is to computer as doll is to	toy	toy	0.62	1	1	{'toy': 0.62, 'child': 0.09, '______': 0.02, 'what': 0.02, '__': 0.02}	0	0.617188	0	1	original		0.02	FALSE	FALSE	FALSE	out-of-context	{}
Semantic Relations	nationality_adjective	Italian is to Italy as German is to	germany	Germany	0.61	1	1	{'Germany': 0.61, 'Austria': 0.07, '______': 0.04, 'Switzerland': 0.03, '__': 0.03}	0	0.605469	0	1	original		0.02	FALSE	FALSE	FALSE	out-of-context	{}
Semantic Hierarchies	hypernyms_animals	triceratops is to dinosaur as tyrannosaurus is to	dinosaur	dinosaur	0.6	1	1	{'dinosaur': 0.6, 'what': 0.02, 'rept': 0.02, 'animal': 0.01, 'pre': 0.01}	0	0.601562	0	1	original		0.02	FALSE	FALSE	FALSE	out-of-context	{}
Semantic Relations	nationality_adjective	Maltese is to Malta as German is to	germany	Germany	0.59	1	1	{'Germany': 0.59, 'Austria': 0.21, 'Switzerland': 0.05, 'Lie': 0.03, 'the': 0.01}	0	0.585938	0	1	original		0.02	FALSE	FALSE	FALSE	out-of-context	{}
Semantic Hierarchies	hypernyms_animals	allosaurus is to dinosaur as tyrannosaurus is to	dinosaur	dinosaur	0.52	1	1	{'dinosaur': 0.52, 'rept': 0.04, 'tyr': 0.03, 'lizard': 0.02, 'what': 0.02}	0	0.519531	0	1	original		0.02	FALSE	FALSE	FALSE	out-of-context	{}
Semantic Hierarchies	hyponyms_misc	diamond is to jewel as doll is to	toy	toy	0.44	1	1	{'toy': 0.44, 'doll': 0.07, '______': 0.04, '_____': 0.04, '': 0.03}	0	0.439453	0	1	original		0.02	FALSE	FALSE	FALSE	out-of-context	{}
Verbal & Grammatical Forms	adjective_to_adverb	precisely is to precise as rapidly is to	rapid	rapid	0.44	1	1	{'rapid': 0.44, 'quick': 0.1, 'rap': 0.05, '': 0.02, '______': 0.02}	0	0.443359	0	1	original		0.02	FALSE	FALSE	FALSE	out-of-context	{}
Semantic Hierarchies	hyponyms_misc	rifle is to gun as watercolor is to	painting	paint	0.43	0.5	1	{'paint': 0.43, 'painting': 0.05, 'art': 0.04, '______': 0.03, 'what': 0.03}	1	0.0549316	0.376709	0.99999	original		0.02	FALSE	FALSE	FALSE	out-of-context	{}
Semantic Hierarchies	hyponyms_misc	lollipop is to candy as doll is to	toy	toy	0.38	1	1	{'toy': 0.38, '______': 0.07, '____': 0.05, 'what': 0.04, '_____': 0.04}	0	0.380859	0	1	original		0.02	FALSE	FALSE	FALSE	out-of-context	{}
Factual Knowledge	capital_world	Gaborone is to Botswana as Nairobi is to	kenya	Kenya	0.37	1	1	{'Kenya': 0.37, '______': 0.12, '__': 0.08, 'which': 0.07, '': 0.05}	0	0.369141	0	1	original		0.02	FALSE	FALSE	FALSE	out-of-context	{}
Factual Knowledge	country_language	Bahamas is to English as Chile is to	spanish	Spanish	0.36	1	1	{'Spanish': 0.36, '______': 0.07, '': 0.04, '____': 0.03, '?': 0.03}	0	0.363281	0	1	original		0.02	FALSE	FALSE	FALSE	out-of-context	{}
Factual Knowledge	capital_world	Ottawa is to Canada as Antananarivo is to	madagascar	what	0.36	0	1	{'what': 0.36, '?': 0.13, 'which': 0.08, 'Madagascar': 0.07, '?"': 0.04}	3	0.0708008	0.288574	0.99997	original		0.02	FALSE	FALSE	FALSE	out-of-context	{}
Morphological Modifiers	comparative	lower is to low as harder is to	hard	hard	0.36	1	1	{'hard': 0.36, 'high': 0.11, 'easy': 0.08, '?': 0.03, '': 0.03}	0	0.359375	0	1	original		0.02	FALSE	FALSE	FALSE	out-of-context	{}
Verbal & Grammatical Forms	plural	mango is to mangoes as finger is to	fingers	fingers	0.36	1	1	{'fingers': 0.36, '______': 0.08, '': 0.04, '____': 0.03, '_': 0.03}	0	0.363281	0	1	original		0.02	FALSE	FALSE	FALSE	out-of-context	{}
Factual Knowledge	name_nationality	darwin is to English as lavoisier is to	french	French	0.35	1	1	{'French': 0.35, 'french': 0.1, 'what': 0.06, '?': 0.04, '': 0.03}	0	0.347656	0	1	original		0.02	FALSE	FALSE	FALSE	out-of-context	{}
Factual Knowledge	capital_world	Chisinau is to Moldova as Kathmandu is to	nepal	Nepal	0.35	1	1	{'Nepal': 0.35, 'what': 0.09, ':': 0.09, '______': 0.06, '__': 0.06}	0	0.351562	0	1	original		0.02	FALSE	FALSE	FALSE	out-of-context	{}
Verbal & Grammatical Forms	verb_inf_Ved	attended is to attend as followed is to	follow	lead	0.35	0	1	{'lead': 0.35, 'follow': 0.29, 'be': 0.13, 'go': 0.02, 'obey': 0.01}	1	0.291016	0.0605469	0.99999	original		0.02	FALSE	FALSE	FALSE	out-of-context	{}
Semantic Hierarchies	hypernyms_animals	fox is to canine as wolf is to	canine	f	0.34	0	1	{'f': 0.34, 'canine': 0.1, '______': 0.05, '__': 0.04, '____': 0.03}	1	0.0961914	0.239746	0.99999	original		0.02	FALSE	FALSE	FALSE	out-of-context	{}
Factual Knowledge	capital_world	Sofia is to Bulgaria as Antananarivo is to	madagascar	what	0.33	0	1	{'what': 0.33, '?"': 0.09, '?': 0.09, 'which': 0.06, 'Madagascar': 0.05}	4	0.0478516	0.28418	0.99996	original		0.02	FALSE	FALSE	FALSE	out-of-context	{}
Morphological Modifiers	verb+able_reg	identifiable is to identify as imaginable is to	imagine	identify	0.33	0	1	{'identify': 0.33, 'be': 0.11, 'imagine': 0.05, 'have': 0.02, 'become': 0.02}	2	0.0473633	0.280762	0.99998	original		0.02	FALSE	FALSE	FALSE	out-of-context	{}
Morphological Modifiers	verb+able_reg	definable is to define as imaginable is to	imagine	define	0.33	0	1	{'define': 0.33, 'imagine': 0.04, 'make': 0.02, 'describe': 0.02, 'say': 0.02}	1	0.0407715	0.29126	0.99999	original		0.02	FALSE	FALSE	FALSE	out-of-context	{}
Verbal & Grammatical Forms	verb_inf_Ved	agreed is to agree as announced is to	announce	agree	0.33	0	1	{'agree': 0.33, 'announce': 0.05, 'be': 0.04, 'accept': 0.02, 'have': 0.02}	1	0.0505371	0.279541	0.99999	original		0.02	FALSE	FALSE	FALSE	out-of-context	{}
Semantic Relations	nationality_adjective	Dutch is to Netherlands as Spanish is to	spain	Spain	0.32	1	1	{'Spain': 0.32, '______': 0.05, 'Mexico': 0.05, '?': 0.04, ':': 0.03}	0	0.320312	0	1	original		0.02	FALSE	FALSE	FALSE	out-of-context	{}
Semantic Hierarchies	hyponyms_misc	rifle is to gun as doll is to	toy	toy	0.31	1	1	{'toy': 0.31, '______': 0.06, '_____': 0.06, '____': 0.06, 'what': 0.04}	0	0.308594	0	1	original		0.02	FALSE	FALSE	FALSE	out-of-context	{}
Semantic Relations	nationality_adjective	Dutch is to Netherlands as German is to	germany	Germany	0.31	1	1	{'Germany': 0.31, ':': 0.06, '______': 0.05, '?': 0.05, '': 0.05}	0	0.306641	0	1	original		0.02	FALSE	FALSE	FALSE	out-of-context	{}
Verbal & Grammatical Forms	verb_inf_3pSg	appears is to appear as follows is to	follow	appear	0.3	0	1	{'appear': 0.3, 'be': 0.19, 'have': 0.03, 'follow': 0.02, 'disappear': 0.02}	3	0.0217285	0.279053	0.99997	original		0.02	FALSE	FALSE	FALSE	out-of-context	{}
Factual Knowledge	currency	Hungary is to forint as Europe is to	euro	euro	0.29	1	1	{'euro': 0.29, '?': 0.1, 'what': 0.08, '______': 0.04, ':': 0.04}	0	0.289062	0	1	original		0.02	FALSE	FALSE	FALSE	out-of-context	{}
Factual Knowledge	currency	dinar is to Algeria as lats is to	latvia	?	0.29	0	1	{'?': 0.08, 'which': 0.11, 'Latvia': 0.1, '': 0.06}	2	0.0961914	0.190918	0.99998	original		0.02	FALSE	FALSE	FALSE	out-of-context	{}
Semantic Hierarchies	hyponyms_misc	haiku is to poem as doll is to	toy	toy	0.29	1	1	{'toy': 0.29, 'child': 0.07, 'doll': 0.06, '______': 0.04, '__': 0.04}	0	0.287109	0	1	original		0.02	FALSE	FALSE	FALSE	out-of-context	{}
Factual Knowledge	capital_world	Zimbabwe is to Harare as Afghanistan is to	kabul	?	0.28	0	1	{'?': 0.16, 'Kabul': 0.19, 'what': 0.07, ':': 0.05}	1	0.191406	0.0878906	0.99999	original		0.02	FALSE	FALSE	FALSE	out-of-context	{}
Semantic Hierarchies	hyponyms_misc	sneakers is to shoes as doll is to	toy	toy	0.28	1	1	{'toy': 0.28, 'toys': 0.08, 'what': 0.05, '______': 0.03, '': 0.03}	0	0.275391	0	1	original		0.02	FALSE	FALSE	FALSE	out-of-context	{}
Factual Knowledge	capital_world	Mogadishu is to Somalia as Santiago is to	chile	Chile	0.27	1	1	{'Chile': 0.27, '______': 0.21, '__': 0.13, '____': 0.08, 'what': 0.05}	0	0.273438	0	1	original		0.02	FALSE	FALSE	FALSE	out-of-context	{}
Semantic Hierarchies	hyponyms_misc	paperback is to book as doll is to	toy	toy	0.27	1	1	{'toy': 0.27, 'child': 0.06, 'girl': 0.06, '______': 0.04, '"': 0.03}	0	0.265625	0	1	original		0.02	FALSE	FALSE	FALSE	out-of-context	{}
Factual Knowledge	currency	Hungary is to forint as Vietnam is to	dong	?	0.26	0	1	{'?': 0.06, '"': 0.07, 'what': 0.05, 'dong': 0.05}	4	0.0512695	0.208496	0.99996	original		0.02	FALSE	FALSE	FALSE	out-of-context	{}
Factual Knowledge	country_language	Bahamas is to English as Ecuador is to	spanish	Spanish	0.25	1	1	{'Spanish': 0.25, '______': 0.08, '?': 0.05, '__': 0.04, ':': 0.04}	0	0.25	0	1	original		0.02	FALSE	FALSE	FALSE	out-of-context	{}
Factual Knowledge	capital_world	Bujumbura is to Burundi as Copenhagen is to	denmark		0.25	0	1	{'': 0.25, 'what': 0.21, 'Denmark': 0.14, 'which': 0.09, '?': 0.04}	2	0.141602	0.107422	0.99998	original		0.02	FALSE	FALSE	FALSE	out-of-context	{}
Semantic Hierarchies	hyponyms_misc	watercolor is to painting as doll is to	toy	toy	0.25	1	1	{'toy': 0.25, 'doll': 0.06, 'child': 0.06, 'play': 0.04, 'sculpture': 0.03}	0	0.24707	0	1	original		0.02	FALSE	FALSE	FALSE	out-of-context	{}
Semantic Hierarchies	hyponyms_misc	camcorder is to camera as limousine is to	car	car	0.25	1	1	{'car': 0.25, 'automobile': 0.05, ':': 0.05, 'what': 0.05, '______': 0.03}	0	0.245117	0	1	original		0.02	FALSE	FALSE	FALSE	out-of-context	{}
Verbal & Grammatical Forms	verb_inf_Ved	identified is to identify as replaced is to	replace	be	0.25	0	1	{'be': 0.25, 'identify': 0.19, 'replace': 0.05, 'become': 0.05, 'accept': 0.02}	3	0.0454102	0.199707	0.99997	original		0.02	FALSE	FALSE	FALSE	out-of-context	{}
Verbal & Grammatical Forms	verb_inf_Ved	attended is to attend as decided is to	decide	attend	0.25	0	1	{'attend': 0.25, 'decide': 0.12, 'be': 0.09, 'have': 0.02, 'make': 0.02}	1	0.125	0.123047	0.99999	original		0.02	FALSE	FALSE	FALSE	out-of-context	{}
Factual Knowledge	capital_world	Niamey is to Niger as Suva is to	fiji	?	0.24	0	1	{'?': 0.24, 'what': 0.13, '...': 0.08, 'Fiji': 0.05, ':': 0.04}	3	0.0527344	0.183594	0.99997	original		0.02	FALSE	FALSE	FALSE	out-of-context	{}
Semantic Hierarchies	hyponyms_misc	paperback is to book as watercolor is to	painting	painting	0.24	1	1	{'painting': 0.24, 'paint': 0.13, 'art': 0.06, 'what': 0.03, 'canvas': 0.03}	0	0.241211	0	1	original		0.02	FALSE	FALSE	FALSE	out-of-context	{}
Verbal & Grammatical Forms	verb_inf_Ved	identified is to identify as improved is to	improve	identify	0.24	0	1	{'identify': 0.24, 'be': 0.1, 'improve': 0.03, 'accept': 0.02, 'have': 0.02}	2	0.0286865	0.211548	0.99998	original		0.02	FALSE	FALSE	FALSE	out-of-context	{}
Verbal & Grammatical Forms	verb_inf_Ved	agreed is to agree as followed is to	follow	agree	0.24	0	1	{'agree': 0.24, 'follow': 0.08, 'be': 0.07, 'do': 0.03, 'go': 0.02}	1	0.0786133	0.162598	0.99999	original		0.02	FALSE	FALSE	FALSE	out-of-context	{}
Factual Knowledge	country_language	Jordan is to Arabic as Kuwait is to	arabic	Arabic	0.23	1	1	{'Arabic': 0.23, 'what': 0.12, '?': 0.05, '______': 0.04, '': 0.03}	0	0.225586	0	1	original		0.02	FALSE	FALSE	FALSE	out-of-context	{}
Factual Knowledge	currency	Poland is to zloty as Europe is to	euro	euro	0.22	1	1	{'euro': 0.22, 'what': 0.1, '?': 0.08, ':': 0.04, '______': 0.04}	0	0.220703	0	1	original		0.02	FALSE	FALSE	FALSE	out-of-context	{}
Factual Knowledge	currency	dinar is to Algeria as real is to	brazil	Brazil	0.22	1	1	{'Brazil': 0.22, '?': 0.04, '______': 0.05, 'which': 0.04}	0	0.224609	0	1	original		0.02	FALSE	FALSE	FALSE	out-of-context	{}
Factual Knowledge	name_occupation	pacino is to actor as schwarzenegger is to	actor	politician	0.22	0	1	{'politician': 0.22, 'governor': 0.13, 'actor': 0.06, 'what': 0.03, 'body': 0.03}	2	0.0622559	0.155518	0.99998	original		0.02	FALSE	FALSE	FALSE	out-of-context	{}
Factual Knowledge	capital_world	Vaduz is to Liechtenstein as Accra is to	ghana	what	0.22	0	1	{'what': 0.22, '?': 0.12, ':': 0.06, 'Ghana': 0.05, '______': 0.04}	3	0.0478516	0.172852	0.99997	original		0.02	FALSE	FALSE	FALSE	out-of-context	{}
Factual Knowledge	capital_world	Vaduz is to Liechtenstein as Belgrade is to	serbia	what	0.22	0	1	{'what': 0.22, '?': 0.12, 'which': 0.07, ':': 0.06, 'Serbia': 0.06}	4	0.0600586	0.156738	0.99996	original		0.02	FALSE	FALSE	FALSE	out-of-context	{}
Semantic Hierarchies	hyponyms_misc	turtleneck is to sweater as doll is to	toy	toy	0.22	1	1	{'toy': 0.22, '': 0.04, '______': 0.04, 'what': 0.04, '_____': 0.04}	0	0.220703	0	1	original		0.02	FALSE	FALSE	FALSE	out-of-context	{}
Semantic Hierarchies	hyponyms_misc	white is to color as doll is to	toy	toy	0.22	1	1	{'toy': 0.22, '"': 0.06, '______': 0.05, ':': 0.04, '_____': 0.04}	0	0.21582	0	1	original		0.02	FALSE	FALSE	FALSE	out-of-context	{}
Factual Knowledge	capital_world	Suriname is to Paramaribo as France is to	paris	:	0.21	0	1	{':': 0.09, 'Paris': 0.05, '?': 0.05}	3	0.0534668	0.157471	0.99997	original		0.02	FALSE	FALSE	FALSE	out-of-context	{}
Morphological Modifiers	comparative	low is to lower as high is to	higher	raise	0.21	0	1	{'raise': 0.21, 'higher': 0.09, 'high': 0.07, 'height': 0.07, '______': 0.06}	1	0.0922852	0.115723	0.99999	original		0.02	FALSE	FALSE	FALSE	out-of-context	{}
Factual Knowledge	capital_world	Qatar is to Doha as Pakistan is to	islamabad	?	0.2	0	1	{'?': 0.07, 'Islamabad': 0.08, '______': 0.05, 'Lahore': 0.05}	1	0.0766602	0.118652	0.99999	original		0.02	FALSE	FALSE	FALSE	out-of-context	{}
Morphological Modifiers	verb+able_reg	considerable is to consider as extendable is to	extend	consider	0.2	0	1	{'consider': 0.2, 'extend': 0.07, 'be': 0.03, 'make': 0.03, 'think': 0.02}	1	0.0654297	0.136719	0.99999	original		0.02	FALSE	FALSE	FALSE	out-of-context	{}
Semantic Hierarchies	hyponyms_misc	daypack is to backpack as limousine is to	car	car	0.2	1	1	{'car': 0.2, 'automobile': 0.06, 'sedan': 0.04, '______': 0.04, '__': 0.03}	0	0.196289	0	1	original		0.02	FALSE	FALSE	FALSE	out-of-context	{}
Verbal & Grammatical Forms	noun_plural_irreg	armies is to army as families is to	family	?	0.2	0	1	{'?': 0.2, '': 0.03, 'family': 0.04}	3	0.0351562	0.166992	0.99997	original		0.02	FALSE	FALSE	FALSE	out-of-context	{}
Factual Knowledge	currency	Mexico is to peso as Europe is to	euro	euro	0.19	1	1	{'euro': 0.19, '?': 0.09, '______': 0.07, 'what': 0.07, ':': 0.05}	0	0.194336	0	1	original		0.02	FALSE	FALSE	FALSE	out-of-context	{}
Factual Knowledge	capital_world	Niamey is to Niger as Vilnius is to	lithuania	what	0.19	0	1	{'what': 0.19, '?': 0.13, 'which': 0.08, ':': 0.07, 'Lithuania': 0.07}	4	0.0673828	0.12207	0.99996	original		0.02	FALSE	FALSE	FALSE	out-of-context	{}
Semantic Hierarchies	hyponyms_misc	pincushion is to cushion as watercolor is to	painting	paint	0.19	0.5	1	{'paint': 0.19, 'water': 0.05, '______': 0.05, 'painting': 0.04, '': 0.03}	3	0.0449219	0.143555	0.99997	original		0.02	FALSE	FALSE	FALSE	out-of-context	{}
Semantic Hierarchies	hyponyms_misc	laptop is to computer as diamond is to	jewel	gem	0.19	0	1	{'gem': 0.19, 'jewel': 0.16, 'jewelry': 0.12, 'ring': 0.07, 'diamond': 0.04}	1	0.160156	0.0322266	0.99999	original		0.02	FALSE	FALSE	FALSE	out-of-context	{}
Semantic Hierarchies	hyponyms_misc	rake is to tool as doll is to	toy	toy	0.18	1	1	{'toy': 0.18, 'doll': 0.09, 'child': 0.03, '____': 0.03, '__': 0.03}	0	0.183594	0	1	original		0.02	FALSE	FALSE	FALSE	out-of-context	{}
Semantic Hierarchies	hyponyms_misc	hamburger is to burger as watercolor is to	painting	paint	0.18	0.5	1	{'paint': 0.18, 'color': 0.13, 'what': 0.06, 'painting': 0.05, 'water': 0.05}	4	0.0483398	0.131348	0.99996	original		0.02	FALSE	FALSE	FALSE	out-of-context	{}
Factual Knowledge	currency	Bulgaria is to lev as Europe is to	euro	euro	0.17	1	1	{'euro': 0.17, '?': 0.03, 'what': 0.11, ':': 0.06}	0	0.172852	0	1	original		0.02	FALSE	FALSE	FALSE	out-of-context	{}
Factual Knowledge	name_nationality	galilei is to Italian as rousseau is to	french	?	0.17	0	1	{'?': 0.07, 'what': 0.13, '': 0.08, 'french': 0.05}	4	0.0544434	0.112549	0.99996	original		0.02	FALSE	FALSE	FALSE	out-of-context	{}
Factual Knowledge	capital_world	Bamako is to Mali as Belgrade is to	serbia	:	0.17	0	1	{':': 0.06, 'what': 0.1, 'Serbia': 0.08, '': 0.06}	2	0.0766602	0.0961914	0.99998	original		0.02	FALSE	FALSE	FALSE	out-of-context	{}
Verbal & Grammatical Forms	plural	cats is to cat as snakes is to	snake	snake	0.17	1	1	{'snake': 0.17, '______': 0.07, '_____': 0.06, 'what': 0.05, '____': 0.05}	0	0.173828	0	1	original		0.02	FALSE	FALSE	FALSE	out-of-context	{}
Factual Knowledge	currency	Poland is to zloty as Vietnam is to	dong	?	0.16	0	1	{'?': 0.16, '"': 0.09, 'what': 0.07, 'dong': 0.05, '': 0.04}	3	0.0505371	0.104736	0.99997	original		0.02	FALSE	FALSE	FALSE	out-of-context	{}
Factual Knowledge	name_nationality	confucius is to Chinese as lavoisier is to	french		0.16	0	1	{'': 0.16, '?': 0.1, 'what': 0.07, 'french': 0.05}	4	0.0524902	0.108643	0.99996	original		0.02	FALSE	FALSE	FALSE	out-of-context	{}
Factual Knowledge	name_nationality	galilei is to Italian as pascal is to	french	?	0.16	0	1	{'?': 0.16, 'what': 0.13, 'french': 0.1, '': 0.07, 'which': 0.07}	2	0.101562	0.0556641	0.99998	original		0.02	FALSE	FALSE	FALSE	out-of-context	{}
Factual Knowledge	name_nationality	galilei is to Italian as wagner is to	german	?	0.16	0	1	{'?': 0.04, 'german': 0.1, 'what': 0.05, ':': 0.05}	1	0.101074	0.0551758	0.99999	original		0.02	FALSE	FALSE	FALSE	out-of-context	{}
Semantic Relations	animal_shelter	mallard is to nest as wasp is to	nest	nest	0.16	1	1	{'nest': 0.16, 'hive': 0.11, 'build': 0.09, 'bur': 0.05, '?': 0.04}	0	0.15625	0	1	original		0.02	FALSE	FALSE	FALSE	out-of-context	{}
Verbal & Grammatical Forms	plural	snakes is to snake as birds is to	bird	______	0.16	0	1	{'______': 0.16, 'bird': 0.07, '____': 0.05, 'birds': 0.05, 'fly': 0.05}	1	0.065918	0.0922852	0.99999	original		0.02	FALSE	FALSE	FALSE	out-of-context	{}
Verbal & Grammatical Forms	plural	cars is to car as buildings is to	building	?	0.16	0	1	{'?': 0.16, ':': 0.1, 'what': 0.09, '': 0.08, 'building': 0.04}	4	0.0424805	0.120605	0.99996	original		0.02	FALSE	FALSE	FALSE	out-of-context	{}
Semantic Hierarchies	hyponyms_misc	tambourine is to drum as doll is to	toy	toy	0.15	1	1	{'toy': 0.15, '': 0.04, ':': 0.05, '______': 0.04}	0	0.148438	0	1	original		0.02	FALSE	FALSE	FALSE	out-of-context	{}
Semantic Hierarchies	hyponyms_misc	ferry is to boat as doll is to	toy	toy	0.15	1	1	{'toy': 0.15, '': 0.03, ':': 0.05, '?': 0.04}	0	0.147461	0	1	original		0.02	FALSE	FALSE	FALSE	out-of-context	{}
Factual Knowledge	name_nationality	galilei is to Italian as kant is to	german	german	0.14	1	1	{'german': 0.14, '?': 0.05, 'what': 0.09, 'German': 0.06}	0	0.141602	0	1	original		0.02	FALSE	FALSE	FALSE	out-of-context	{}
Semantic Hierarchies	hyponyms_misc	bag is to container as doll is to	toy	toy	0.14	1	1	{'toy': 0.14, 'doll': 0.07, ':': 0.07, '______': 0.06, '?': 0.05}	0	0.141602	0	1	original		0.02	FALSE	FALSE	FALSE	out-of-context	{}
Semantic Hierarchies	hyponyms_misc	rifle is to gun as diamond is to	jewel	gem	0.14	0	1	{'gem': 0.14, 'jewel': 0.09, 'diamond': 0.09, 'rock': 0.05, 'stone': 0.04}	2	0.0917969	0.0507812	0.99998	original		0.02	FALSE	FALSE	FALSE	out-of-context	{}
Semantic Hierarchies	hyponyms_misc	lullaby is to song as doll is to	toy	toy	0.14	1	1	{'toy': 0.14, '_____': 0.07, '______': 0.06, ':': 0.06, '': 0.04}	0	0.135742	0	1	original		0.02	FALSE	FALSE	FALSE	out-of-context	{}
Verbal & Grammatical Forms	plural	rats is to rat as snakes is to	snake	snake	0.14	1	1	{'snake': 0.14, '______': 0.09, '_____': 0.04, '': 0.04, '____': 0.03}	0	0.137695	0	1	original		0.02	FALSE	FALSE	FALSE	out-of-context	{}
Verbal & Grammatical Forms	verb_inf_Ved	appeared is to appear as provided is to	provide	be	0.14	0	1	{'be': 0.14, 'appear': 0.11, 'provide': 0.06, 'have': 0.02, 'come': 0.01}	2	0.0605469	0.0761719	0.99998	original		0.02	FALSE	FALSE	FALSE	out-of-context	{}
Verbal & Grammatical Forms	verb_inf_Ved	announced is to announce as improved is to	improve	improve	0.14	1	1	{'improve': 0.14, 'announce': 0.07, 'make': 0.04, 'say': 0.02, 'be': 0.02}	0	0.139648	0	1	original		0.02	FALSE	FALSE	FALSE	out-of-context	{}
Factual Knowledge	name_nationality	copernicus is to Polish as rousseau is to	french	french	0.13	1	1	{'french': 0.13, '?': 0.09, 'which': 0.09, 'what': 0.09, '': 0.07}	0	0.132812	0	1	original		0.02	FALSE	FALSE	FALSE	out-of-context	{}
Factual Knowledge	capital_world	Uruguay is to Montevideo as France is to	paris	Paris	0.13	1	1	{'Paris': 0.13, ':': 0.05, '______': 0.06}	0	0.12793	0	1	original		0.02	FALSE	FALSE	FALSE	out-of-context	{}
Semantic Hierarchies	hyponyms_misc	bag is to container as polo is to	shirt		0.13	0	1	{'': 0.13, '?': 0.09, 'shirt': 0.07, 'sport': 0.05, ':': 0.04}	2	0.0698242	0.0610352	0.99998	original		0.02	FALSE	FALSE	FALSE	out-of-context	{}
Semantic Hierarchies	hypernyms_animals	bovid is to goat as primate is to	human	monkey	0.13	0	1	{'monkey': 0.13, '______': 0.07, 'chimpan': 0.06, 'ape': 0.05, 'human': 0.04}	4	0.0449219	0.0849609	0.99996	original		0.02	FALSE	FALSE	FALSE	out-of-context	{}
Semantic Hierarchies	hyponyms_misc	spring is to season as doll is to	toy	toy	0.13	1	1	{'toy': 0.13, '______': 0.05, '_____': 0.04, '': 0.04, 'a': 0.03}	0	0.126953	0	1	original		0.02	FALSE	FALSE	FALSE	out-of-context	{}
Semantic Hierarchies	hyponyms_misc	camcorder is to camera as doll is to	toy	toy	0.13	1	1	{'toy': 0.13, 'baby': 0.12, 'child': 0.11, 'doll': 0.07, '______': 0.04}	0	0.125977	0	1	original		0.02	FALSE	FALSE	FALSE	out-of-context	{}
Semantic Hierarchies	hyponyms_misc	january is to month as doll is to	toy	toy	0.13	1	1	{'toy': 0.13, '': 0.04, '?': 0.05}	0	0.126953	0	1	original		0.02	FALSE	FALSE	FALSE	out-of-context	{}
Verbal & Grammatical Forms	plural	goats is to goat as elephants is to	elephant	elephants	0.13	0	1	{'elephants': 0.13, '______': 0.08, 'elephant': 0.06, '__': 0.05, '': 0.04}	2	0.0585938	0.0732422	0.99998	original		0.02	FALSE	FALSE	FALSE	out-of-context	{}
Factual Knowledge	currency	Denmark is to krone as Europe is to	euro	?	0.12	0	1	{'?': 0.12, 'euro': 0.11, ':': 0.09, 'what': 0.06, '': 0.05}	1	0.105469	0.0141602	0.99999	original		0.02	FALSE	FALSE	FALSE	out-of-context	{}
Semantic Hierarchies	hyponyms_misc	bunk is to bed as doll is to	toy	toy	0.12	1	1	{'toy': 0.12, '______': 0.07, '_____': 0.05, '____': 0.05, 'doll': 0.04}	0	0.116699	0	1	original		0.02	FALSE	FALSE	FALSE	out-of-context	{}
Semantic Hierarchies	hyponyms_misc	paperback is to book as polo is to	shirt	horse	0.12	0	1	{'horse': 0.12, 'sport': 0.06, 'what': 0.06, 'polo': 0.04, 'shirt': 0.03}	4	0.0291748	0.0865479	0.99996	original		0.02	FALSE	FALSE	FALSE	out-of-context	{}
Semantic Hierarchies	hyponyms_misc	teacup is to cup as doll is to	toy	toy	0.12	1	1	{'toy': 0.12, '______': 0.08, '_____': 0.05, 'what': 0.04, ':': 0.04}	0	0.125	0	1	original		0.02	FALSE	FALSE	FALSE	out-of-context	{}
Semantic Hierarchies	hyponyms_misc	thundercloud is to cloud as doll is to	toy	toy	0.12	1	1	{'toy': 0.12, '______': 0.06, '_____': 0.05, '__': 0.05, 'girl': 0.05}	0	0.125	0	1	original		0.02	FALSE	FALSE	FALSE	out-of-context	{}
Semantic Hierarchies	hyponyms_misc	daypack is to backpack as thermos is to	flask	therm	0.12	0	1	{'therm': 0.12, 'flask': 0.07, 'bottle': 0.05, '__': 0.04, '______': 0.04}	1	0.0732422	0.0478516	0.99999	original		0.02	FALSE	FALSE	FALSE	out-of-context	{}
Semantic Hierarchies	hypernyms_animals	primate is to human as rodent is to	mouse	pr	0.12	0	1	{'pr': 0.12, '______': 0.09, 'mouse': 0.06, 'rat': 0.05, 'non': 0.05}	2	0.0595703	0.059082	0.99998	original		0.02	FALSE	FALSE	FALSE	out-of-context	{}
Verbal & Grammatical Forms	noun_plural_reg	events is to event as governments is to	government	government	0.12	1	1	{'government': 0.12, '?': 0.04, 'govern': 0.08, '': 0.06}	0	0.120117	0	1	original		0.02	FALSE	FALSE	FALSE	out-of-context	{}
Semantic Hierarchies	hyponyms_misc	teacup is to cup as diamond is to	jewel	gem	0.11	0	1	{'gem': 0.11, 'jewel': 0.05, 'diamond': 0.05, '': 0.04, '______': 0.04}	2	0.0532227	0.0522461	0.99998	original		0.02	FALSE	FALSE	FALSE	out-of-context	{}
Semantic Hierarchies	hyponyms_misc	sneakers is to shoes as turtleneck is to	sweater	sweater	0.11	1	1	{'sweater': 0.11, '': 0.04, 'shirt': 0.08, ':': 0.04}	0	0.11084	0	1	original		0.02	FALSE	FALSE	FALSE	out-of-context	{}
Semantic Hierarchies	hypernyms_animals	fowl is to duck as rodent is to	mouse		0.11	0	1	{'': 0.08, ':': 0.06, '?': 0.06, 'mouse': 0.04}	4	0.0449219	0.0698242	0.99996	original		0.02	FALSE	FALSE	FALSE	out-of-context	{}
Factual Knowledge	currency	Ukraine is to hryvnia as Vietnam is to	dong	dong	0.1	1	1	{'dong': 0.1, '"': 0.09, '?': 0.07, '______': 0.05, 'what': 0.05}	0	0.0957031	0	1	original		0.02	FALSE	FALSE	FALSE	out-of-context	{}
Factual Knowledge	name_nationality	beethoven is to German as lavoisier is to	french		0.1	0	1	{'': 0.1, '?': 0.09, 'what': 0.08, 'french': 0.05, 'French': 0.05}	3	0.0493164	0.0551758	0.99997	original		0.02	FALSE	FALSE	FALSE	out-of-context	{}
Factual Knowledge	name_occupation	confucius is to philosopher as hegel is to	philosopher	philosopher	0.1	1	1	{'philosopher': 0.1, 'what': 0.05, '': 0.04, '?': 0.03}	0	0.103516	0	1	original		0.02	FALSE	FALSE	FALSE	related	{}
Factual Knowledge	country_capital	Afghanistan is to Kabul as France is to	paris	:	0.1	0	1	{':': 0.08, '?': 0.06, 'Paris': 0.06}	3	0.059082	0.0444336	0.99997	original		0.02	FALSE	FALSE	FALSE	out-of-context	{}
Factual Knowledge	capital_world	Afghanistan is to Kabul as France is to	paris	:	0.1	0	1	{':': 0.08, '?': 0.06, 'Paris': 0.06}	3	0.059082	0.0444336	0.99997	original		0.02	FALSE	FALSE	FALSE	out-of-context	{}
Semantic Hierarchies	hyponyms_misc	pouch is to bag as doll is to	toy	toy	0.1	1	1	{'toy': 0.1, '______': 0.08, 'doll': 0.07, '_____': 0.05, '': 0.04}	0	0.097168	0	1	original		0.02	FALSE	FALSE	FALSE	out-of-context	{}
Semantic Hierarchies	hyponyms_misc	lollipop is to candy as diamond is to	jewel	jewel	0.1	1	1	{'jewel': 0.1, 'jewelry': 0.09, 'gem': 0.08, '______': 0.04, '?': 0.03}	0	0.102539	0	1	original		0.02	FALSE	FALSE	FALSE	out-of-context	{}
Semantic Hierarchies	hyponyms_misc	paperback is to book as limousine is to	car	:	0.1	0	1	{':': 0.08, 'car': 0.08, '"': 0.05, 'what': 0.05}	1	0.0844727	0.0112305	0.99999	original		0.02	FALSE	FALSE	FALSE	out-of-context	{}
Semantic Relations	opposite	uncertain is to certain as unproductive is to	productive	______	0.1	0	1	{'______': 0.1, ':': 0.07, '': 0.06, 'productive': 0.05, '"': 0.05}	4	0.0512695	0.0444336	0.99996	original		0.02	FALSE	FALSE	FALSE	out-of-context	{}
Factual Knowledge	name_nationality	michelangelo is to Italian as rousseau is to	french	french	0.09	1	1	{'french': 0.09, 'what': 0.08, 'a': 0.06, '"': 0.04}	0	0.0922852	0	1	original		0.02	FALSE	FALSE	FALSE	out-of-context	{}
Semantic Hierarchies	hyponyms_misc	broiler is to oven as doll is to	toy		0.09	0	1	{'': 0.09, '?': 0.06, '______': 0.06, 'what': 0.06, 'toy': 0.05}	4	0.0524902	0.0339355	0.99996	original		0.02	FALSE	FALSE	FALSE	out-of-context	{}
Semantic Hierarchies	hyponyms_misc	pouch is to bag as limousine is to	car	car	0.09	1	1	{'car': 0.09, 'what': 0.08, '': 0.07, ':': 0.06, '?': 0.06}	0	0.0878906	0	1	original		0.02	FALSE	FALSE	FALSE	out-of-context	{}
Semantic Hierarchies	hyponyms_misc	pepper is to spice as doll is to	toy		0.09	0	1	{'': 0.04, 'toy': 0.07, ':': 0.06, '?': 0.05}	1	0.0688477	0.0195312	0.99999	original		0.02	FALSE	FALSE	FALSE	out-of-context	{}
Semantic Hierarchies	hyponyms_misc	thermos is to flask as diamond is to	jewel	gem	0.09	0	1	{'gem': 0.09, 'diamond': 0.09, '______': 0.06, '__': 0.06, 'jewel': 0.04}	4	0.0437012	0.0432129	0.99996	original		0.02	FALSE	FALSE	FALSE	out-of-context	{}
Semantic Hierarchies	hyponyms_misc	thermos is to flask as doll is to	toy	:	0.09	0	1	{':': 0.09, '': 0.07, 'doll': 0.06, 'toy': 0.05, '?': 0.05}	4	0.0483398	0.0419922	0.99996	original		0.02	FALSE	FALSE	FALSE	out-of-context	{}
Semantic Hierarchies	hyponyms_misc	hamburger is to burger as doll is to	toy	____	0.09	0	1	{'____': 0.09, '_____': 0.07, '______': 0.06, 'toy': 0.04, 'what': 0.03}	3	0.0449219	0.0444336	0.99997	original		0.02	FALSE	FALSE	FALSE	out-of-context	{}
Semantic Hierarchies	hypernyms_animals	dog is to canine as fox is to	canine	canine	0.09	1	1	{'canine': 0.09, 'what': 0.06, '"': 0.05, '______': 0.05, '_': 0.04}	0	0.0854492	0	1	original		0.02	FALSE	FALSE	FALSE	related	{}
Factual Knowledge	name_occupation	confucius is to philosopher as mencius is to	philosopher		0.08	0	1	{'': 0.04, '?': 0.06, 'what': 0.05, 'philosopher': 0.05}	3	0.0471191	0.0354004	0.99997	original		0.02	FALSE	FALSE	FALSE	related	{}
Semantic Hierarchies	hyponyms_misc	limousine is to car as ukulele is to	guitar	guitar	0.08	1	1	{'guitar': 0.08, ':': 0.05, 'what': 0.04, '': 0.04, '______': 0.04}	0	0.081543	0	1	original		0.02	FALSE	FALSE	FALSE	out-of-context	{}
Semantic Hierarchies	hyponyms_misc	limousine is to car as watercolor is to	painting	paint	0.08	0.5	1	{'paint': 0.08, 'painting': 0.06, '?': 0.05, 'what': 0.05, '': 0.05}	1	0.060791	0.017334	0.99999	original		0.02	FALSE	FALSE	FALSE	out-of-context	{}
Verbal & Grammatical Forms	verb_inf_Ved	developed is to develop as identified is to	identify	develop	0.08	0	1	{'develop': 0.08, 'be': 0.07, 'identify': 0.04, 'make': 0.02, 'have': 0.02}	2	0.0422363	0.036377	0.99998	original		0.02	FALSE	FALSE	FALSE	out-of-context	{}
Verbal & Grammatical Forms	verb_inf_Ved	expected is to expect as followed is to	follow	be	0.08	0	1	{'be': 0.08, 'expect': 0.05, 'see': 0.04, 'follow': 0.03, 'do': 0.03}	3	0.0322266	0.0449219	0.99997	original		0.02	FALSE	FALSE	FALSE	out-of-context	{}
Semantic Hierarchies	hyponyms_misc	blender is to mixer as doll is to	toy		0.07	0	1	{'': 0.07, 'toy': 0.06, 'doll': 0.05, '______': 0.05, ':': 0.05}	1	0.0571289	0.0161133	0.99999	original		0.02	FALSE	FALSE	FALSE	out-of-context	{}
Semantic Hierarchies	hyponyms_misc	thermos is to flask as polo is to	shirt		0.07	0	1	{'': 0.03, 'what': 0.06, 'shirt': 0.06, '?': 0.05}	2	0.0566406	0.0161133	0.99998	original		0.02	FALSE	FALSE	FALSE	out-of-context	{}
Semantic Hierarchies	hyponyms_misc	daypack is to backpack as doll is to	toy	doll	0.07	0	1	{'doll': 0.07, '______': 0.07, 'toy': 0.06, '____': 0.04, '__': 0.04}	2	0.0583496	0.0163574	0.99998	original		0.02	FALSE	FALSE	FALSE	out-of-context	{}
Semantic Hierarchies	hyponyms_misc	lemon is to citrus as doll is to	toy		0.07	0	1	{'': 0.07, 'toy': 0.07, ':': 0.06, '?': 0.05, 'what': 0.05}	1	0.0742188	0	0.99999	original		0.02	FALSE	FALSE	FALSE	out-of-context	{}
Factual Knowledge	name_occupation	confucius is to philosopher as locke is to	philosopher		0.06	0	1	{'': 0.06, '?': 0.05, '______': 0.04, 'what': 0.04, 'philosopher': 0.04}	4	0.036377	0.0236816	0.99996	original		0.02	FALSE	FALSE	FALSE	out-of-context	{}
Semantic Hierarchies	hyponyms_misc	bookshelf is to shelf as doll is to	toy	:	0.06	0	1	{':': 0.06, 'toy': 0.06, '?': 0.05, 'doll': 0.05, '': 0.05}	1	0.0554199	0.00170898	0.99999	original		0.02	FALSE	FALSE	FALSE	out-of-context	{}
Semantic Hierarchies	hyponyms_misc	daypack is to backpack as turtleneck is to	sweater	sweater	0.06	1	1	{'sweater': 0.06, '': 0.05, '______': 0.04, 'shirt': 0.04, ':': 0.04}	0	0.0566406	0	1	original		0.02	FALSE	FALSE	FALSE	out-of-context	{}
Factual Knowledge	capital_world	Mogadishu is to Somalia as Thimphu is to	bhutan	Bh	0.49	0.5	0.5	{'Bh': 0.49, '__': 0.07, '______': 0.07, '____': 0.03, 'what': 0.03}	0	0.492188	0	1	original		0.02	FALSE	FALSE	FALSE	out-of-context	{}
Factual Knowledge	capital_world	Namibia is to Windhoek as Ghana is to	accra	Acc	0.43	0.5	0.5	{'Acc': 0.43, '______': 0.07, '__': 0.05, '____': 0.03, '_': 0.03}	0	0.425781	0	1	original		0.02	FALSE	FALSE	FALSE	out-of-context	{}
Factual Knowledge	capital_world	Paramaribo is to Suriname as Thimphu is to	bhutan	Bh	0.38	0.5	0.5	{'Bh': 0.38, '?': 0.04, 'what': 0.06, 'which': 0.03}	0	0.380859	0	1	original		0.02	FALSE	FALSE	FALSE	out-of-context	{}
Factual Knowledge	capital_world	Sofia is to Bulgaria as Thimphu is to	bhutan	Bh	0.33	0.5	0.5	{'Bh': 0.33, '?"': 0.05, 'what': 0.06, '?': 0.05}	0	0.333984	0	1	original		0.02	FALSE	FALSE	FALSE	out-of-context	{}
Factual Knowledge	UK_city_county	birmingham is to midlands as leicester is to	midlands	east	0.29	0	0.5	{'east': 0.29, 'mid': 0.08, '______': 0.04, '_____': 0.03, 'the': 0.03}	354	7.00951e-05	0.288992	0.996472	original		0.02	FALSE	FALSE	FALSE	out-of-context	{}
Verbal & Grammatical Forms	verb_3pSg_Ved	establishes is to established as happens is to	happened	happen	0.29	0.5	0.5	{'happen': 0.29, 'be': 0.06, 'have': 0.02, 'establish': 0.02, 'occur': 0.02}	11	0.00872803	0.280334	0.99989	original		0.02	FALSE	FALSE	FALSE	out-of-context	{}
Semantic Hierarchies	hypernyms_animals	jackal is to canine as mouse is to	rodent	rod	0.28	0.5	0.5	{'rod': 0.28, '_____': 0.06, '______': 0.05, '': 0.03}	0	0.277344	0	1	original		0.02	FALSE	FALSE	FALSE	out-of-context	{}
Factual Knowledge	capital_world	Lusaka is to Zambia as Thimphu is to	bhutan	Bh	0.25	0.5	0.5	{'Bh': 0.25, 'which': 0.09, '?': 0.05, '___': 0.04, '______': 0.04}	0	0.251953	0	1	original		0.02	FALSE	FALSE	FALSE	out-of-context	{}
Factual Knowledge	capital_world	Banjul is to Gambia as Bishkek is to	kyrgyzstan	?	0.24	0	0.5	{'?': 0.24, 'what': 0.11, 'which': 0.07, '': 0.06, 'Ky': 0.05}	4	0.0524902	0.182861	0.99996	original		0.02	FALSE	FALSE	FALSE	out-of-context	{}
Factual Knowledge	capital_world	Ottawa is to Canada as Thimphu is to	bhutan	Bh	0.22	0.5	0.5	{'Bh': 0.22, 'which': 0.12, 'what': 0.08, '______': 0.05, '?': 0.05}	0	0.224609	0	1	original		0.02	FALSE	FALSE	FALSE	out-of-context	{}
Factual Knowledge	capital_world	Liechtenstein is to Vaduz as Ghana is to	accra	Acc	0.22	0.5	0.5	{'Acc': 0.22, '?': 0.1, ':': 0.04, '': 0.03}	0	0.223633	0	1	original		0.02	FALSE	FALSE	FALSE	out-of-context	{}
Semantic Hierarchies	hypernyms_animals	eagle is to raptor as mouse is to	rodent	rod	0.22	0.5	0.5	{'rod': 0.22, 'mamm': 0.09, '_____': 0.06, '______': 0.04, '____': 0.04}	0	0.220703	0	1	original		0.02	FALSE	FALSE	FALSE	out-of-context	{}
Semantic Relations	family	brothers is to sisters as stepson is to	stepdaughter	step	0.22	0.5	0.5	{'step': 0.22, '': 0.05, ':': 0.04, '?': 0.04, '__': 0.04}	0	0.217773	0	1	original		0.02	FALSE	FALSE	FALSE	out-of-context	{}
Semantic Hierarchies	hyponyms_misc	thundercloud is to cloud as watercolor is to	painting	paint	0.21	0.5	0.5	{'paint': 0.21, 'color': 0.1, 'water': 0.06, '': 0.03, ':': 0.03}	7	0.0241699	0.183838	0.99993	original		0.02	FALSE	FALSE	FALSE	out-of-context	{}
Verbal & Grammatical Forms	adjective_to_adverb	precise is to precisely as rapid is to	rapidly	slow	0.2	0	0.5	{'slow': 0.2, 'rapid': 0.07, 'quick': 0.06, 'swift': 0.03, 'fast': 0.03}	43	0.00253296	0.198639	0.999572	original		0.02	FALSE	FALSE	FALSE	out-of-context	{}
Factual Knowledge	UK_city_county	ely is to cambridgeshire as salford is to	manchester	man	0.18	0.5	0.5	{'man': 0.18, '?': 0.03, 'what': 0.06}	116	0.000402451	0.178308	0.998844	original		0.02	FALSE	FALSE	FALSE	out-of-context	{}
Verbal & Grammatical Forms	verb_3pSg_Ved	considered is to considers as related is to	relates	consider	0.18	0	0.5	{'consider': 0.18, 'be': 0.04, 'relate': 0.03, 'make': 0.02, 'see': 0.02}	170	0.000774384	0.17696	0.998306	original		0.02	FALSE	FALSE	FALSE	out-of-context	{}
Semantic Hierarchies	hypernyms_animals	leopard is to feline as mouse is to	rodent	rod	0.17	0.5	0.5	{'rod': 0.17, '_____': 0.07, '______': 0.06, '': 0.04, '?': 0.04}	0	0.173828	0	1	original		0.02	FALSE	FALSE	FALSE	out-of-context	{}
Semantic Relations	male_female	buck is to doe as fisherman is to	fisherwoman	fish	0.17	0.5	0.5	{'fish': 0.17, 'catch': 0.06, 'fishing': 0.02, 'do': 0.02, 'hook': 0.02}	0	0.170898	0	1	original		0.02	FALSE	FALSE	FALSE	out-of-context	{}
Verbal & Grammatical Forms	plural	color is to colors as donkey is to	donkeys	animals	0.17	0	0.5	{'animals': 0.17, 'what': 0.04, 'a': 0.04, 'don': 0.04, '"': 0.03}	3	0.0366211	0.138184	0.99997	original		0.02	FALSE	FALSE	FALSE	out-of-context	{}
Verbal & Grammatical Forms	verb_3pSg_Ved	applies is to applied as follows is to	followed	be	0.16	0	0.5	{'be': 0.16, 'apply': 0.14, 'applied': 0.08, 'the': 0.04, 'follow': 0.02}	201	0.000427246	0.160706	0.997997	original		0.02	FALSE	FALSE	FALSE	out-of-context	{}
Verbal & Grammatical Forms	plural	pears is to pear as melons is to	melon	?	0.15	0	0.5	{'?': 0.05, '': 0.07, 'what': 0.06, 'mel': 0.05}	134	0.00037384	0.150993	0.998665	original		0.02	FALSE	FALSE	FALSE	out-of-context	{}
Factual Knowledge	UK_city_county	lincoln is to lincolnshire as salford is to	manchester	what	0.14	0	0.5	{'what': 0.14, 'where': 0.12, 'man': 0.1, 'lanc': 0.06, '': 0.04}	172	0.000234604	0.138437	0.998286	original		0.02	FALSE	FALSE	FALSE	out-of-context	{}
Factual Knowledge	capital_world	Afghanistan is to Kabul as Niger is to	niamey	Ni	0.14	0.5	0.5	{'Ni': 0.14, '?': 0.05, 'what': 0.05, '': 0.05}	0	0.139648	0	1	original		0.02	FALSE	FALSE	FALSE	out-of-context	{}
Factual Knowledge	capital_world	Mauritania is to Nouakchott as Ghana is to	accra	what	0.11	0	0.5	{'what': 0.11, '': 0.11, 'Acc': 0.1, '?': 0.05}	2	0.0996094	0.0131836	0.99998	original		0.02	FALSE	FALSE	FALSE	out-of-context	{}
Morphological Modifiers	comparative	low is to lower as simple is to	simpler	simplify	0.11	0	0.5	{'simplify': 0.11, '______': 0.09, 'simple': 0.06, 'complex': 0.05, 'comp': 0.04}	25	0.00601196	0.100433	0.999751	original		0.02	FALSE	FALSE	FALSE	out-of-context	{}
Morphological Modifiers	comparative	low is to lower as quick is to	quicker	quick	0.11	0.5	0.5	{'quick': 0.11, '': 0.06, '?': 0.06, '______': 0.06}	102	0.000713348	0.11208	0.998984	original		0.02	FALSE	FALSE	FALSE	out-of-context	{}
Factual Knowledge	UK_city_county	bradford is to yorkshire as hull is to	yorkshire	hum	0.1	0	0.5	{'hum': 0.1, 'lanc': 0.05, 'lin': 0.05, "''": 0.05, 'york': 0.04}	307	0.000161171	0.100913	0.996941	original		0.02	FALSE	FALSE	FALSE	out-of-context	{}
Factual Knowledge	capital_world	Gambia is to Banjul as Moldova is to	chisinau	:	0.09	0	0.5	{':': 0.09, 'Ch': 0.09, '?': 0.06, '': 0.06}	1	0.0883789	0.00292969	0.99999	original		0.02	FALSE	FALSE	FALSE	out-of-context	{}
Factual Knowledge	UK_city_county	crawley is to sussex as salford is to	manchester	?	0.08	0	0.5	{'?': 0.04, 'what': 0.07, 'man': 0.06, 'lanc': 0.06}	158	0.000362396	0.076786	0.998426	original		0.02	FALSE	FALSE	FALSE	out-of-context	{}
Factual Knowledge	UK_city_county	brighton is to sussex as salford is to	manchester	?	0.08	0	0.5	{'?': 0.07, 'man': 0.08, ':': 0.06, '': 0.04}	73	0.00162506	0.0740585	0.999273	original		0.02	FALSE	FALSE	FALSE	out-of-context	{}
Verbal & Grammatical Forms	plural	eagles is to eagle as melons is to	melon	?	0.06	0	0.5	{'?': 0.05, '': 0.06, '"': 0.05, 'mel': 0.04}	338	0.000146866	0.0608883	0.996632	original		0.02	FALSE	FALSE	FALSE	out-of-context	{}
Mathematics	math_division5	20 is to 4 as 65 is to	13	x	0.78	0	0	{'x': 0.78, 'y': 0.08, 'what': 0.04, '': 0.03, 'X': 0.03}	2383	3.11993e-08	0.777344	0.976254	original		0.02	FALSE	FALSE	FALSE	out-of-context	{}
Mathematics	math_division2	14 is to 7 as 80 is to	40	x	0.76	0	0	{'x': 0.76, 'y': 0.11, 'what': 0.03, 'X': 0.03, '': 0.02}	2729	3.63216e-08	0.761719	0.972806	original		0.02	FALSE	FALSE	FALSE	out-of-context	{}
Mathematics	math_division2	26 is to 13 as 80 is to	40	x	0.75	0	0	{'x': 0.75, 'y': 0.12, 'X': 0.03, 'what': 0.03, '\\(': 0.02}	2345	2.6077e-08	0.746094	0.976632	original		0.02	FALSE	FALSE	FALSE	out-of-context	{}
Mathematics	math_division5	60 is to 12 as 80 is to	16	x	0.75	0	0	{'x': 0.75, 'y': 0.13, 'what': 0.04, '': 0.02, 'X': 0.02}	562	2.28174e-07	0.746094	0.9944	original		0.02	FALSE	FALSE	FALSE	out-of-context	{}
Mathematics	math_division2	24 is to 12 as 80 is to	40	x	0.74	0	0	{'x': 0.74, 'y': 0.1, 'what': 0.07, '': 0.03, 'X': 0.02}	1922	4.16767e-08	0.742187	0.980847	original		0.02	FALSE	FALSE	FALSE	out-of-context	{}
Mathematics	math_division2	26 is to 13 as 96 is to	48	x	0.74	0	0	{'x': 0.74, 'y': 0.13, 'what': 0.04, 'X': 0.03, '\\(': 0.02}	3625	1.46683e-08	0.742187	0.963877	original		0.02	FALSE	FALSE	FALSE	out-of-context	{}
Mathematics	math_division2	6 is to 3 as 96 is to	48	x	0.74	0	0	{'x': 0.74, 'y': 0.12, 'what': 0.04, '': 0.03, 'X': 0.03}	6385	1.2049e-08	0.742187	0.936374	original		0.02	FALSE	FALSE	FALSE	out-of-context	{}
Mathematics	math_division2	10 is to 5 as 50 is to	25	x	0.74	0	0	{'x': 0.74, 'y': 0.12, 'what': 0.05, 'X': 0.02, '': 0.02}	1075	1.10362e-07	0.742187	0.989288	original		0.02	FALSE	FALSE	FALSE	out-of-context	{}
Mathematics	math_division2	100 is to 50 as 60 is to	30	x	0.74	0	0	{'x': 0.74, 'y': 0.09, 'what': 0.06, 'X': 0.03, '': 0.02}	2520	2.45636e-08	0.738281	0.974888	original		0.02	FALSE	FALSE	FALSE	out-of-context	{}
Mathematics	math_double	30 is to 60 as 15 is to	30	x	0.73	0	0	{'x': 0.73, '': 0.1, 'y': 0.06, 'X': 0.04, 'what': 0.03}	755	1.61119e-07	0.730469	0.992476	original		0.02	FALSE	FALSE	FALSE	out-of-context	{}
Mathematics	math_division2	34 is to 17 as 80 is to	40	x	0.73	0	0	{'x': 0.73, 'y': 0.12, '': 0.04, 'what': 0.03, '\\(': 0.02}	1920	4.49363e-08	0.734375	0.980867	original		0.02	FALSE	FALSE	FALSE	out-of-context	{}
Mathematics	math_division2	28 is to 14 as 96 is to	48	x	0.73	0	0	{'x': 0.73, 'y': 0.1, 'what': 0.06, 'X': 0.03, '': 0.03}	3766	2.22353e-08	0.734375	0.962472	original		0.02	FALSE	FALSE	FALSE	out-of-context	{}
Mathematics	math_division2	50 is to 25 as 80 is to	40	x	0.73	0	0	{'x': 0.73, 'y': 0.1, 'what': 0.05, 'X': 0.03, '': 0.03}	988	9.40636e-08	0.730469	0.990155	original		0.02	FALSE	FALSE	FALSE	out-of-context	{}
Mathematics	math_division2	100 is to 50 as 26 is to	13	x	0.73	0	0	{'x': 0.73, 'y': 0.08, 'what': 0.05, '': 0.05, 'X': 0.04}	3417	2.53785e-08	0.730469	0.96595	original		0.02	FALSE	FALSE	FALSE	out-of-context	{}
Mathematics	math_division2	100 is to 50 as 34 is to	17	x	0.73	0	0	{'x': 0.73, 'y': 0.06, 'what': 0.06, '': 0.05, 'X': 0.04}	3581	2.16532e-08	0.734375	0.964316	original		0.02	FALSE	FALSE	FALSE	out-of-context	{}
Mathematics	math_division2	100 is to 50 as 76 is to	38	x	0.73	0	0	{'x': 0.73, 'what': 0.08, 'y': 0.07, '': 0.04, 'X': 0.04}	9619	3.24508e-09	0.726562	0.904147	original		0.02	FALSE	FALSE	FALSE	out-of-context	{}
Mathematics	math_division5	65 is to 13 as 80 is to	16	x	0.73	0	0	{'x': 0.73, 'y': 0.13, '\\(': 0.04, 'what': 0.03, '': 0.02}	514	2.66358e-07	0.734375	0.994878	original		0.02	FALSE	FALSE	FALSE	out-of-context	{}
Mathematics	math_division2	34 is to 17 as 96 is to	48	x	0.72	0	0	{'x': 0.72, 'y': 0.14, '': 0.04, 'what': 0.04, 'X': 0.02}	2861	2.98023e-08	0.722656	0.97149	original		0.02	FALSE	FALSE	FALSE	out-of-context	{}
Mathematics	math_division2	36 is to 18 as 96 is to	48	x	0.72	0	0	{'x': 0.72, 'y': 0.12, 'what': 0.05, '': 0.04, 'X': 0.02}	2062	3.18978e-08	0.71875	0.979452	original		0.02	FALSE	FALSE	FALSE	out-of-context	{}
Mathematics	math_division2	30 is to 15 as 76 is to	38	x	0.72	0	0	{'x': 0.72, 'y': 0.08, '': 0.06, 'what': 0.06, 'X': 0.03}	9197	3.28873e-09	0.71875	0.908353	original		0.02	FALSE	FALSE	FALSE	out-of-context	{}
Mathematics	math_squares	20 is to 400 as 25 is to	625	x	0.72	0	0	{'x': 0.72, 'y': 0.06, 'what': 0.06, 'X': 0.05, '': 0.05}	7749	6.49015e-09	0.71875	0.922782	original		0.02	FALSE	FALSE	FALSE	out-of-context	{}
Mathematics	math_division2	6 is to 3 as 80 is to	40	x	0.72	0	0	{'x': 0.72, 'y': 0.11, 'what': 0.04, '': 0.04, 'X': 0.03}	2450	5.19212e-08	0.722656	0.975586	original		0.02	FALSE	FALSE	FALSE	out-of-context	{}
Mathematics	math_division2	100 is to 50 as 94 is to	47	x	0.72	0	0	{'x': 0.72, 'what': 0.08, 'y': 0.07, '': 0.03, 'X': 0.03}	6516	7.85803e-09	0.722656	0.935069	original		0.02	FALSE	FALSE	FALSE	out-of-context	{}
Mathematics	math_division2	100 is to 50 as 64 is to	32	x	0.72	0	0	{'x': 0.72, 'y': 0.08, 'what': 0.06, '': 0.04, 'X': 0.03}	6695	1.10595e-08	0.71875	0.933285	original		0.02	FALSE	FALSE	FALSE	out-of-context	{}
Mathematics	math_double	60 is to 120 as 20 is to	40	x	0.71	0	0	{'x': 0.71, 'y': 0.09, '': 0.05, 'what': 0.05, 'X': 0.04}	547	2.40281e-07	0.710937	0.994549	original		0.02	FALSE	FALSE	FALSE	out-of-context	{}
Mathematics	math_division2	24 is to 12 as 60 is to	30	x	0.71	0	0	{'x': 0.71, 'y': 0.11, 'what': 0.09, '': 0.02, 'X': 0.02}	4146	1.64146e-08	0.710937	0.958685	original		0.02	FALSE	FALSE	FALSE	out-of-context	{}
Mathematics	math_division2	30 is to 15 as 94 is to	47	x	0.71	0	0	{'x': 0.71, '': 0.09, 'y': 0.07, 'what': 0.06, 'X': 0.03}	4448	1.28639e-08	0.707031	0.955676	original		0.02	FALSE	FALSE	FALSE	out-of-context	{}
Mathematics	math_division2	28 is to 14 as 80 is to	40	x	0.71	0	0	{'x': 0.71, 'y': 0.11, 'what': 0.06, 'X': 0.03, '': 0.03}	2171	5.12227e-08	0.710937	0.978366	original		0.02	FALSE	FALSE	FALSE	out-of-context	{}
Mathematics	math_squares	15 is to 225 as 26 is to	676	x	0.71	0	0	{'x': 0.71, 'what': 0.08, 'y': 0.08, '': 0.05, 'X': 0.03}	30829	2.6921e-10	0.710937	0.692791	original		0.02	FALSE	FALSE	FALSE	out-of-context	{}
Mathematics	math_division2	12 is to 6 as 80 is to	40	x	0.71	0	0	{'x': 0.71, 'y': 0.13, '': 0.05, 'what': 0.04, 'X': 0.02}	1406	6.56582e-08	0.714844	0.985989	original		0.02	FALSE	FALSE	FALSE	out-of-context	{}
Mathematics	math_double	65 is to 130 as 20 is to	40	x	0.7	0	0	{'x': 0.7, 'what': 0.08, 'y': 0.07, '': 0.06, 'X': 0.04}	769	1.39698e-07	0.703125	0.992337	original		0.02	FALSE	FALSE	FALSE	out-of-context	{}
Mathematics	math_division2	36 is to 18 as 80 is to	40	x	0.7	0	0	{'x': 0.7, 'y': 0.15, 'what': 0.05, '': 0.04, 'X': 0.02}	1172	6.65896e-08	0.695312	0.988321	original		0.02	FALSE	FALSE	FALSE	out-of-context	{}
Mathematics	math_division2	24 is to 12 as 94 is to	47	x	0.7	0	0	{'x': 0.7, '': 0.08, 'y': 0.08, 'what': 0.07, 'X': 0.02}	4180	1.83936e-08	0.699219	0.958347	original		0.02	FALSE	FALSE	FALSE	out-of-context	{}
Mathematics	math_division2	26 is to 13 as 94 is to	47	x	0.7	0	0	{'x': 0.7, 'y': 0.13, 'what': 0.06, 'X': 0.03, '': 0.03}	3731	1.54832e-08	0.703125	0.962821	original		0.02	FALSE	FALSE	FALSE	out-of-context	{}
Mathematics	math_division2	50 is to 25 as 76 is to	38	x	0.7	0	0	{'x': 0.7, 'y': 0.08, 'what': 0.08, '': 0.06, 'X': 0.04}	8731	3.8126e-09	0.699219	0.912996	original		0.02	FALSE	FALSE	FALSE	out-of-context	{}
Mathematics	math_division2	40 is to 20 as 76 is to	38	x	0.7	0	0	{'x': 0.7, 'y': 0.1, 'what': 0.07, '': 0.07, 'X': 0.03}	7522	5.03496e-09	0.703125	0.925044	original		0.02	FALSE	FALSE	FALSE	out-of-context	{}
Mathematics	math_squares	30 is to 900 as 26 is to	676	x	0.7	0	0	{'x': 0.7, 'what': 0.12, 'y': 0.09, '': 0.03, 'X': 0.02}	31371	2.03727e-10	0.695312	0.68739	original		0.02	FALSE	FALSE	FALSE	out-of-context	{}
Mathematics	math_squares	30 is to 900 as 25 is to	625	x	0.7	0	0	{'x': 0.7, 'what': 0.1, 'y': 0.07, 'X': 0.03, '': 0.03}	11028	2.45927e-09	0.703125	0.890107	original		0.02	FALSE	FALSE	FALSE	out-of-context	{}
Mathematics	math_squares	15 is to 225 as 25 is to	625	x	0.7	0	0	{'x': 0.7, '': 0.08, 'what': 0.07, 'y': 0.07, 'X': 0.04}	5438	8.44011e-09	0.695312	0.945811	original		0.02	FALSE	FALSE	FALSE	out-of-context	{}
Mathematics	math_division2	70 is to 35 as 94 is to	47	x	0.7	0	0	{'x': 0.7, 'y': 0.12, '': 0.06, 'what': 0.05, '\\(': 0.02}	3051	2.6077e-08	0.699219	0.969597	original		0.02	FALSE	FALSE	FALSE	out-of-context	{}
Mathematics	math_double	75 is to 150 as 20 is to	40	x	0.69	0	0	{'x': 0.69, '': 0.08, 'X': 0.06, 'what': 0.06, 'y': 0.05}	1219	1.08965e-07	0.691406	0.987853	original		0.02	FALSE	FALSE	FALSE	out-of-context	{}
Mathematics	math_division2	24 is to 12 as 76 is to	38	x	0.69	0	0	{'x': 0.69, 'what': 0.11, 'y': 0.09, '': 0.05, 'X': 0.02}	10174	3.65253e-09	0.6875	0.898617	original		0.02	FALSE	FALSE	FALSE	out-of-context	{}
Mathematics	math_division2	30 is to 15 as 62 is to	31	x	0.69	0	0	{'x': 0.69, 'y': 0.09, '': 0.08, 'what': 0.06, 'X': 0.03}	8361	4.33647e-09	0.6875	0.916683	original		0.02	FALSE	FALSE	FALSE	out-of-context	{}
Mathematics	math_division2	28 is to 14 as 76 is to	38	x	0.69	0	0	{'x': 0.69, 'y': 0.09, 'what': 0.08, '': 0.05, 'X': 0.04}	9161	6.25732e-09	0.6875	0.908711	original		0.02	FALSE	FALSE	FALSE	out-of-context	{}
Mathematics	math_division2	20 is to 10 as 64 is to	32	x	0.69	0	0	{'x': 0.69, 'y': 0.13, 'what': 0.08, '': 0.04, 'X': 0.02}	5294	1.5134e-08	0.6875	0.947246	original		0.02	FALSE	FALSE	FALSE	out-of-context	{}
Mathematics	math_division5	40 is to 8 as 85 is to	17	x	0.69	0	0	{'x': 0.69, 'y': 0.16, 'what': 0.06, '': 0.04, 'X': 0.01}	2939	2.96859e-08	0.691406	0.970713	original		0.02	FALSE	FALSE	FALSE	out-of-context	{}
Mathematics	math_division5	75 is to 15 as 80 is to	16	x	0.69	0	0	{'x': 0.69, 'what': 0.1, 'y': 0.07, '': 0.06, 'X': 0.03}	709	2.01166e-07	0.691406	0.992935	original		0.02	FALSE	FALSE	FALSE	out-of-context	{}
Mathematics	math_division2	34 is to 17 as 76 is to	38	x	0.68	0	0	{'x': 0.68, 'y': 0.13, 'what': 0.07, '': 0.05, 'X': 0.03}	6222	1.21072e-08	0.679687	0.937998	original		0.02	FALSE	FALSE	FALSE	out-of-context	{}
Mathematics	math_division2	30 is to 15 as 46 is to	23	x	0.68	0	0	{'x': 0.68, '': 0.09, 'y': 0.08, 'what': 0.07, 'X': 0.04}	2549	2.30502e-08	0.679687	0.974599	original		0.02	FALSE	FALSE	FALSE	out-of-context	{}
Mathematics	math_division2	30 is to 15 as 34 is to	17	x	0.68	0	0	{'x': 0.68, 'y': 0.09, '': 0.08, 'what': 0.08, 'X': 0.03}	1858	4.4005e-08	0.679687	0.981485	original		0.02	FALSE	FALSE	FALSE	out-of-context	{}
Mathematics	math_division2	30 is to 15 as 64 is to	32	x	0.68	0	0	{'x': 0.68, 'y': 0.11, 'what': 0.07, '': 0.06, 'X': 0.03}	5251	1.44355e-08	0.683594	0.947674	original		0.02	FALSE	FALSE	FALSE	out-of-context	{}
Mathematics	math_division2	8 is to 4 as 64 is to	32	x	0.68	0	0	{'x': 0.68, 'y': 0.14, 'what': 0.06, 'X': 0.03, '': 0.03}	5910	1.72295e-08	0.683594	0.941107	original		0.02	FALSE	FALSE	FALSE	out-of-context	{}
Mathematics	math_division2	10 is to 5 as 64 is to	32	x	0.68	0	0	{'x': 0.68, 'y': 0.15, 'what': 0.06, '': 0.03, 'X': 0.02}	5998	1.68802e-08	0.679687	0.94023	original		0.02	FALSE	FALSE	FALSE	out-of-context	{}
Mathematics	math_division2	10 is to 5 as 76 is to	38	x	0.68	0	0	{'x': 0.68, 'y': 0.11, 'what': 0.07, '': 0.06, 'X': 0.03}	11434	4.80213e-09	0.675781	0.886061	original		0.02	FALSE	FALSE	FALSE	out-of-context	{}
Mathematics	math_division2	100 is to 50 as 46 is to	23	x	0.68	0	0	{'x': 0.68, '': 0.07, 'what': 0.07, 'y': 0.06, 'X': 0.05}	3884	2.17697e-08	0.679687	0.961296	original		0.02	FALSE	FALSE	FALSE	out-of-context	{}
Mathematics	math_double	40 is to 80 as 8 is to	16	x	0.67	0	0	{'x': 0.67, '': 0.12, 'what': 0.08, 'y': 0.07, '\\(': 0.01}	153	3.7998e-06	0.667965	0.998475	original		0.02	FALSE	FALSE	FALSE	out-of-context	{}
Mathematics	math_double	70 is to 140 as 56 is to	112	x	0.67	0	0	{'x': 0.67, 'y': 0.09, 'what': 0.09, '': 0.08, 'X': 0.03}	10059	3.04135e-09	0.667969	0.899763	original		0.02	FALSE	FALSE	FALSE	out-of-context	{}
Mathematics	math_division2	26 is to 13 as 76 is to	38	x	0.67	0	0	{'x': 0.67, 'y': 0.12, 'what': 0.08, 'X': 0.04, '': 0.04}	7664	6.0827e-09	0.671875	0.923629	original		0.02	FALSE	FALSE	FALSE	out-of-context	{}
Mathematics	math_division2	90 is to 45 as 80 is to	40	x	0.67	0	0	{'x': 0.67, 'y': 0.13, 'what': 0.06, '': 0.04, 'X': 0.03}	1170	1.30385e-07	0.667969	0.988341	original		0.02	FALSE	FALSE	FALSE	out-of-context	{}
Mathematics	math_double	36 is to 72 as 20 is to	40	x	0.66	0	0	{'x': 0.66, 'what': 0.11, 'y': 0.08, '': 0.07, 'X': 0.04}	631	2.57045e-07	0.660156	0.993712	original		0.02	FALSE	FALSE	FALSE	out-of-context	{}
Mathematics	math_double	6 is to 12 as 20 is to	40	x	0.66	0	0	{'x': 0.66, 'y': 0.17, 'what': 0.06, 'X': 0.04, '': 0.03}	1321	7.77654e-08	0.65625	0.986836	original		0.02	FALSE	FALSE	FALSE	out-of-context	{}
Mathematics	math_double	80 is to 160 as 20 is to	40	x	0.66	0	0	{'x': 0.66, '': 0.12, 'X': 0.06, 'y': 0.06, 'what': 0.05}	360	6.63102e-07	0.656249	0.996413	original		0.02	FALSE	FALSE	FALSE	out-of-context	{}
Mathematics	math_double	60 is to 120 as 30 is to	60	x	0.66	0	0	{'x': 0.66, 'y': 0.15, 'what': 0.06, '': 0.04, 'X': 0.04}	806	1.15484e-07	0.65625	0.991968	original		0.02	FALSE	FALSE	FALSE	out-of-context	{}
Mathematics	math_double	60 is to 120 as 72 is to	144	x	0.66	0	0	{'x': 0.66, 'y': 0.15, 'what': 0.07, '': 0.04, 'X': 0.03}	5858	7.50879e-09	0.65625	0.941625	original		0.02	FALSE	FALSE	FALSE	out-of-context	{}
Mathematics	math_double	65 is to 130 as 30 is to	60	x	0.66	0	0	{'x': 0.66, 'y': 0.12, 'what': 0.08, '': 0.04, 'X': 0.04}	1647	5.05242e-08	0.664062	0.983588	original		0.02	FALSE	FALSE	FALSE	out-of-context	{}
Mathematics	math_double	70 is to 140 as 85 is to	170	x	0.66	0	0	{'x': 0.66, '': 0.1, 'what': 0.09, 'y': 0.09, 'X': 0.02}	759	1.32248e-07	0.664062	0.992437	original		0.02	FALSE	FALSE	FALSE	out-of-context	{}
Mathematics	math_division2	50 is to 25 as 34 is to	17	x	0.66	0	0	{'x': 0.66, 'what': 0.09, 'y': 0.08, '': 0.07, 'X': 0.04}	3634	2.08383e-08	0.664062	0.963787	original		0.02	FALSE	FALSE	FALSE	out-of-context	{}
Mathematics	math_division2	40 is to 20 as 50 is to	25	x	0.66	0	0	{'x': 0.66, 'y': 0.14, '': 0.08, 'X': 0.04, 'what': 0.04}	620	2.51457e-07	0.65625	0.993822	original		0.02	FALSE	FALSE	FALSE	out-of-context	{}
Mathematics	math_division2	4 is to 2 as 64 is to	32	x	0.66	0	0	{'x': 0.66, 'y': 0.12, 'what': 0.07, '': 0.05, 'X': 0.04}	5458	2.51457e-08	0.65625	0.945611	original		0.02	FALSE	FALSE	FALSE	out-of-context	{}
Mathematics	math_division2	14 is to 7 as 62 is to	31	x	0.66	0	0	{'x': 0.66, 'y': 0.12, 'what': 0.06, '': 0.05, 'X': 0.04}	8947	8.73115e-09	0.660156	0.910844	original		0.02	FALSE	FALSE	FALSE	out-of-context	{}
Mathematics	math_division2	8 is to 4 as 26 is to	13	x	0.66	0	0	{'x': 0.66, 'y': 0.15, 'what': 0.07, '': 0.05, 'X': 0.03}	1612	8.5216e-08	0.65625	0.983937	original		0.02	FALSE	FALSE	FALSE	out-of-context	{}
Mathematics	math_division2	10 is to 5 as 26 is to	13	x	0.66	0	0	{'x': 0.66, 'y': 0.15, 'what': 0.07, '': 0.04, 'X': 0.03}	1341	1.08965e-07	0.664062	0.986637	original		0.02	FALSE	FALSE	FALSE	out-of-context	{}
Mathematics	math_division2	12 is to 6 as 76 is to	38	x	0.66	0	0	{'x': 0.66, 'y': 0.11, '': 0.08, 'what': 0.07, 'X': 0.02}	8204	6.89761e-09	0.660156	0.918248	original		0.02	FALSE	FALSE	FALSE	out-of-context	{}
Mathematics	math_division2	14 is to 7 as 26 is to	13	x	0.66	0	0	{'x': 0.66, 'y': 0.16, 'what': 0.06, '': 0.04, 'X': 0.03}	1655	7.31088e-08	0.660156	0.983508	original		0.02	FALSE	FALSE	FALSE	out-of-context	{}
Mathematics	math_division2	90 is to 45 as 76 is to	38	x	0.66	0	0	{'x': 0.66, 'y': 0.12, 'what': 0.07, '': 0.06, 'X': 0.03}	7973	5.96629e-09	0.660156	0.92055	original		0.02	FALSE	FALSE	FALSE	out-of-context	{}
Mathematics	math_division2	80 is to 40 as 76 is to	38	x	0.66	0	0	{'x': 0.66, 'y': 0.13, '': 0.07, 'what': 0.06, 'X': 0.03}	8531	5.44242e-09	0.65625	0.914989	original		0.02	FALSE	FALSE	FALSE	out-of-context	{}
Mathematics	math_double	50 is to 100 as 30 is to	60	x	0.65	0	0	{'x': 0.65, 'y': 0.13, 'what': 0.07, 'X': 0.05, '': 0.04}	1183	7.96281e-08	0.648437	0.988211	original		0.02	FALSE	FALSE	FALSE	out-of-context	{}
Mathematics	math_double	80 is to 160 as 30 is to	60	x	0.65	0	0	{'x': 0.65, '': 0.1, 'y': 0.08, 'what': 0.06, 'X': 0.06}	517	3.03611e-07	0.648437	0.994848	original		0.02	FALSE	FALSE	FALSE	out-of-context	{}
Mathematics	math_division2	36 is to 18 as 64 is to	32	x	0.65	0	0	{'x': 0.65, 'y': 0.17, 'what': 0.06, '': 0.05, 'X': 0.02}	3493	1.89757e-08	0.652344	0.965193	original		0.02	FALSE	FALSE	FALSE	out-of-context	{}
Mathematics	math_division2	26 is to 13 as 64 is to	32	x	0.65	0	0	{'x': 0.65, 'y': 0.17, 'what': 0.06, 'X': 0.03, '\\(': 0.02}	5569	1.28057e-08	0.648437	0.944505	original		0.02	FALSE	FALSE	FALSE	out-of-context	{}
Mathematics	math_division2	50 is to 25 as 46 is to	23	x	0.65	0	0	{'x': 0.65, 'what': 0.09, 'y': 0.09, '': 0.07, 'X': 0.04}	4333	1.71131e-08	0.648437	0.956822	original		0.02	FALSE	FALSE	FALSE	out-of-context	{}
Mathematics	math_division2	48 is to 24 as 80 is to	40	x	0.65	0	0	{'x': 0.65, 'y': 0.15, 'what': 0.08, '': 0.04, 'X': 0.03}	1773	6.33299e-08	0.652344	0.982332	original		0.02	FALSE	FALSE	FALSE	out-of-context	{}
Mathematics	math_division2	14 is to 7 as 46 is to	23	x	0.65	0	0	{'x': 0.65, 'y': 0.12, 'what': 0.08, '': 0.05, 'X': 0.03}	3823	2.92202e-08	0.652344	0.961904	original		0.02	FALSE	FALSE	FALSE	out-of-context	{}
Mathematics	math_division2	20 is to 10 as 58 is to	29	x	0.65	0	0	{'x': 0.65, 'what': 0.11, 'y': 0.09, '': 0.08, 'X': 0.02}	4441	1.5134e-08	0.652344	0.955746	original		0.02	FALSE	FALSE	FALSE	out-of-context	{}
Mathematics	math_division2	20 is to 10 as 46 is to	23	x	0.65	0	0	{'x': 0.65, '': 0.1, 'what': 0.09, 'y': 0.09, 'X': 0.03}	2821	3.00352e-08	0.648437	0.971889	original		0.02	FALSE	FALSE	FALSE	out-of-context	{}
Mathematics	math_division5	65 is to 13 as 85 is to	17	x	0.65	0	0	{'x': 0.65, 'y': 0.15, 'what': 0.05, '': 0.04, '\\(': 0.04}	2022	6.37956e-08	0.652344	0.979851	original		0.02	FALSE	FALSE	FALSE	out-of-context	{}
Mathematics	math_division2	90 is to 45 as 62 is to	31	x	0.65	0	0	{'x': 0.65, 'y': 0.12, '': 0.08, 'what': 0.07, 'X': 0.03}	8432	5.64614e-09	0.648437	0.915976	original		0.02	FALSE	FALSE	FALSE	out-of-context	{}
Mathematics	math_division2	80 is to 40 as 62 is to	31	x	0.65	0	0	{'x': 0.65, 'y': 0.12, '': 0.09, 'what': 0.05, 'X': 0.03}	8882	4.83124e-09	0.652344	0.911492	original		0.02	FALSE	FALSE	FALSE	out-of-context	{}
Mathematics	math_double	30 is to 60 as 24 is to	48	x	0.64	0	0	{'x': 0.64, 'y': 0.13, 'what': 0.08, '': 0.06, 'X': 0.04}	4076	1.58325e-08	0.640625	0.959383	original		0.02	FALSE	FALSE	FALSE	out-of-context	{}
Mathematics	math_double	50 is to 100 as 72 is to	144	x	0.64	0	0	{'x': 0.64, 'y': 0.12, 'what': 0.09, '': 0.05, 'X': 0.04}	7429	6.69388e-09	0.644531	0.925971	original		0.02	FALSE	FALSE	FALSE	out-of-context	{}
Mathematics	math_double	95 is to 190 as 20 is to	40	x	0.64	0	0	{'x': 0.64, 'y': 0.08, 'what': 0.07, '': 0.07, 'X': 0.04}	1432	1.71363e-07	0.644531	0.98573	original		0.02	FALSE	FALSE	FALSE	out-of-context	{}
Mathematics	math_double	72 is to 144 as 20 is to	40	x	0.64	0	0	{'x': 0.64, 'what': 0.11, '': 0.09, 'y': 0.07, 'X': 0.03}	1021	1.60187e-07	0.640625	0.989826	original		0.02	FALSE	FALSE	FALSE	out-of-context	{}
Mathematics	math_division2	38 is to 19 as 96 is to	48	x	0.64	0	0	{'x': 0.64, 'y': 0.18, 'what': 0.06, 'X': 0.04, '': 0.03}	2171	4.5402e-08	0.636719	0.978366	original		0.02	FALSE	FALSE	FALSE	out-of-context	{}
Mathematics	math_division2	24 is to 12 as 46 is to	23	x	0.64	0	0	{'x': 0.64, 'what': 0.1, '': 0.09, 'y': 0.09, 'X': 0.03}	2362	4.1211e-08	0.640625	0.976463	original		0.02	FALSE	FALSE	FALSE	out-of-context	{}
Mathematics	math_division2	48 is to 24 as 76 is to	38	x	0.64	0	0	{'x': 0.64, 'y': 0.12, 'what': 0.11, '': 0.05, 'X': 0.03}	6637	7.567e-09	0.636719	0.933863	original		0.02	FALSE	FALSE	FALSE	out-of-context	{}
Mathematics	math_division2	6 is to 3 as 64 is to	32	x	0.64	0	0	{'x': 0.64, 'y': 0.15, 'what': 0.08, '': 0.04, 'X': 0.03}	7096	1.44355e-08	0.640625	0.929289	original		0.02	FALSE	FALSE	FALSE	out-of-context	{}
Mathematics	math_division2	12 is to 6 as 64 is to	32	x	0.64	0	0	{'x': 0.64, 'y': 0.17, 'what': 0.07, '': 0.05, '\\(': 0.02}	5016	1.72295e-08	0.644531	0.950016	original		0.02	FALSE	FALSE	FALSE	out-of-context	{}
Mathematics	math_division2	96 is to 48 as 80 is to	40	x	0.64	0	0	{'x': 0.64, 'what': 0.12, 'y': 0.12, '': 0.03, '\\(': 0.03}	1750	7.12462e-08	0.636719	0.982561	original		0.02	FALSE	FALSE	FALSE	out-of-context	{}
Mathematics	math_division2	70 is to 35 as 46 is to	23	x	0.64	0	0	{'x': 0.64, 'y': 0.11, '': 0.1, 'what': 0.06, 'X': 0.03}	3548	2.57278e-08	0.644531	0.964644	original		0.02	FALSE	FALSE	FALSE	out-of-context	{}
Mathematics	math_division2	72 is to 36 as 80 is to	40	x	0.64	0	0	{'x': 0.64, 'y': 0.16, 'what': 0.08, '': 0.04, '\\(': 0.02}	1671	6.65896e-08	0.640625	0.983349	original		0.02	FALSE	FALSE	FALSE	out-of-context	{}
Mathematics	math_division2	70 is to 35 as 76 is to	38	x	0.64	0	0	{'x': 0.64, 'y': 0.15, 'what': 0.07, '': 0.06, '\\(': 0.02}	6901	8.73115e-09	0.640625	0.931232	original		0.02	FALSE	FALSE	FALSE	out-of-context	{}
Mathematics	math_double	35 is to 70 as 56 is to	112	x	0.63	0	0	{'x': 0.63, 'y': 0.16, 'what': 0.08, '': 0.05, '\\(': 0.03}	9597	3.47791e-09	0.628906	0.904367	original		0.02	FALSE	FALSE	FALSE	out-of-context	{}
Mathematics	math_double	52 is to 104 as 16 is to	32	x	0.63	0	0	{'x': 0.63, '': 0.11, 'what': 0.1, 'y': 0.05, 'X': 0.05}	1952	7.68341e-08	0.632812	0.980548	original		0.02	FALSE	FALSE	FALSE	out-of-context	{}
Mathematics	math_double	45 is to 90 as 15 is to	30	x	0.63	0	0	{'x': 0.63, 'y': 0.09, '': 0.09, 'what': 0.08, '\\(': 0.03}	820	1.89058e-07	0.628906	0.991829	original		0.02	FALSE	FALSE	FALSE	out-of-context	{}
Mathematics	math_double	30 is to 60 as 16 is to	32	x	0.63	0	0	{'x': 0.63, '': 0.17, 'y': 0.09, 'what': 0.05, 'X': 0.03}	2939	2.30502e-08	0.628906	0.970713	original		0.02	FALSE	FALSE	FALSE	out-of-context	{}
Mathematics	math_double	60 is to 120 as 26 is to	52	x	0.63	0	0	{'x': 0.63, 'y': 0.12, '': 0.08, 'what': 0.08, 'X': 0.04}	5730	8.26549e-09	0.628906	0.942901	original		0.02	FALSE	FALSE	FALSE	out-of-context	{}
Mathematics	math_double	75 is to 150 as 28 is to	56	x	0.63	0	0	{'x': 0.63, 'what': 0.1, '': 0.1, 'y': 0.06, 'X': 0.05}	4037	1.53668e-08	0.632812	0.959772	original		0.02	FALSE	FALSE	FALSE	out-of-context	{}
Mathematics	math_division2	34 is to 17 as 62 is to	31	x	0.63	0	0	{'x': 0.63, 'y': 0.16, '': 0.06, 'what': 0.06, 'X': 0.03}	5450	1.6531e-08	0.628906	0.945691	original		0.02	FALSE	FALSE	FALSE	out-of-context	{}
Mathematics	math_division2	28 is to 14 as 46 is to	23	x	0.63	0	0	{'x': 0.63, 'y': 0.12, 'what': 0.08, '': 0.06, 'X': 0.05}	2677	4.2608e-08	0.632812	0.973324	original		0.02	FALSE	FALSE	FALSE	out-of-context	{}
Mathematics	math_cubes	5 is to 125 as 8 is to	512	x	0.63	0	0	{'x': 0.63, 'what': 0.13, 'y': 0.11, '': 0.08, 'X': 0.02}	12634	2.38651e-09	0.628906	0.874103	original		0.02	FALSE	FALSE	FALSE	out-of-context	{}
Mathematics	math_squares	12 is to 144 as 25 is to	625	x	0.63	0	0	{'x': 0.63, 'what': 0.11, 'y': 0.11, '': 0.07, 'X': 0.03}	11825	3.15777e-09	0.628906	0.882165	original		0.02	FALSE	FALSE	FALSE	out-of-context	{}
Mathematics	math_division2	8 is to 4 as 62 is to	31	x	0.63	0	0	{'x': 0.63, 'y': 0.13, 'what': 0.08, '': 0.07, 'X': 0.04}	7251	1.14669e-08	0.632812	0.927744	original		0.02	FALSE	FALSE	FALSE	out-of-context	{}
Mathematics	math_division2	60 is to 30 as 94 is to	47	x	0.63	0	0	{'x': 0.63, 'y': 0.14, '': 0.08, 'what': 0.07, 'X': 0.03}	2956	2.07219e-08	0.628906	0.970544	original		0.02	FALSE	FALSE	FALSE	out-of-context	{}
Mathematics	math_double	40 is to 80 as 16 is to	32	x	0.62	0	0	{'x': 0.62, '': 0.16, 'y': 0.09, 'what': 0.05, 'X': 0.03}	1766	6.89179e-08	0.617187	0.982402	original		0.02	FALSE	FALSE	FALSE	out-of-context	{}
Mathematics	math_double	50 is to 100 as 24 is to	48	x	0.62	0	0	{'x': 0.62, 'what': 0.1, 'y': 0.09, '': 0.07, 'X': 0.05}	4189	1.94414e-08	0.617187	0.958257	original		0.02	FALSE	FALSE	FALSE	out-of-context	{}
Mathematics	math_double	6 is to 12 as 28 is to	56	x	0.62	0	0	{'x': 0.62, 'y': 0.2, 'what': 0.07, 'X': 0.04, '': 0.03}	4638	1.52504e-08	0.621094	0.953783	original		0.02	FALSE	FALSE	FALSE	out-of-context	{}
Mathematics	math_double	100 is to 200 as 46 is to	92	x	0.62	0	0	{'x': 0.62, 'X': 0.1, '': 0.09, 'what': 0.08, 'y': 0.05}	13076	1.59343e-09	0.625	0.869699	original		0.02	FALSE	FALSE	FALSE	out-of-context	{}
Mathematics	math_division2	40 is to 20 as 26 is to	13	x	0.62	0	0	{'x': 0.62, 'y': 0.13, '': 0.09, 'what': 0.08, 'X': 0.03}	2730	3.81842e-08	0.625	0.972796	original		0.02	FALSE	FALSE	FALSE	out-of-context	{}
Mathematics	math_division2	36 is to 18 as 76 is to	38	x	0.62	0	0	{'x': 0.62, 'y': 0.12, '': 0.1, 'what': 0.09, 'X': 0.03}	5501	9.72068e-09	0.625	0.945183	original		0.02	FALSE	FALSE	FALSE	out-of-context	{}
Mathematics	math_division2	28 is to 14 as 32 is to	16	x	0.62	0	0	{'x': 0.62, 'y': 0.16, 'what': 0.09, '': 0.04, 'X': 0.03}	330	9.98378e-07	0.617187	0.996712	original		0.02	FALSE	FALSE	FALSE	out-of-context	{}
Mathematics	math_division2	22 is to 11 as 76 is to	38	x	0.62	0	0	{'x': 0.62, 'y': 0.12, 'what': 0.11, '': 0.06, 'X': 0.02}	8653	9.1386e-09	0.621094	0.913774	original		0.02	FALSE	FALSE	FALSE	out-of-context	{}
Mathematics	math_division2	4 is to 2 as 76 is to	38	x	0.62	0	0	{'x': 0.62, '': 0.1, 'what': 0.09, 'y': 0.08, 'X': 0.05}	8856	1.35624e-08	0.621094	0.911751	original		0.02	FALSE	FALSE	FALSE	out-of-context	{}
Mathematics	math_division2	6 is to 3 as 26 is to	13	x	0.62	0	0	{'x': 0.62, 'y': 0.16, 'what': 0.09, '': 0.05, 'X': 0.03}	1781	8.70787e-08	0.621094	0.982252	original		0.02	FALSE	FALSE	FALSE	out-of-context	{}
Mathematics	math_division2	6 is to 3 as 76 is to	38	x	0.62	0	0	{'x': 0.62, 'y': 0.12, 'what': 0.09, '': 0.08, 'X': 0.03}	11771	6.51926e-09	0.621094	0.882703	original		0.02	FALSE	FALSE	FALSE	out-of-context	{}
Mathematics	math_division2	12 is to 6 as 26 is to	13	x	0.62	0	0	{'x': 0.62, 'y': 0.17, '': 0.08, 'what': 0.07, 'X': 0.02}	1189	1.00117e-07	0.617187	0.988152	original		0.02	FALSE	FALSE	FALSE	out-of-context	{}
Mathematics	math_division5	75 is to 15 as 85 is to	17	x	0.62	0	0	{'x': 0.62, 'what': 0.11, 'y': 0.1, '': 0.07, 'X': 0.04}	2596	3.39933e-08	0.621094	0.974131	original		0.02	FALSE	FALSE	FALSE	out-of-context	{}
Mathematics	math_division2	86 is to 43 as 80 is to	40	x	0.62	0	0	{'x': 0.62, 'y': 0.19, 'what': 0.04, '\\(': 0.04, 'X': 0.03}	2590	4.63333e-08	0.621094	0.974191	original		0.02	FALSE	FALSE	FALSE	out-of-context	{}
Mathematics	math_division2	86 is to 43 as 96 is to	48	x	0.62	0	0	{'x': 0.62, 'y': 0.24, 'what': 0.03, '\\(': 0.03, 'X': 0.02}	2359	3.07336e-08	0.617187	0.976493	original		0.02	FALSE	FALSE	FALSE	out-of-context	{}
Mathematics	math_double	36 is to 72 as 16 is to	32	x	0.61	0	0	{'x': 0.61, 'what': 0.12, '': 0.1, 'y': 0.09, 'X': 0.02}	1920	6.84522e-08	0.609375	0.980867	original		0.02	FALSE	FALSE	FALSE	out-of-context	{}
Mathematics	math_double	40 is to 80 as 30 is to	60	x	0.61	0	0	{'x': 0.61, 'y': 0.17, 'what': 0.07, '': 0.07, 'X': 0.03}	505	3.25963e-07	0.609375	0.994968	original		0.02	FALSE	FALSE	FALSE	out-of-context	{}
Mathematics	math_double	35 is to 70 as 16 is to	32	x	0.61	0	0	{'x': 0.61, '': 0.17, 'y': 0.08, 'what': 0.06, 'X': 0.03}	2652	3.88827e-08	0.605469	0.973573	original		0.02	FALSE	FALSE	FALSE	out-of-context	{}
Mathematics	math_double	34 is to 68 as 16 is to	32	x	0.61	0	0	{'x': 0.61, 'y': 0.17, 'what': 0.08, '': 0.06, '\\(': 0.02}	2267	9.0804e-08	0.605469	0.97741	original		0.02	FALSE	FALSE	FALSE	out-of-context	{}
Mathematics	math_double	80 is to 160 as 72 is to	144	x	0.61	0	0	{'x': 0.61, 'y': 0.11, 'what': 0.1, '': 0.09, 'X': 0.04}	5634	1.15251e-08	0.609375	0.943858	original		0.02	FALSE	FALSE	FALSE	out-of-context	{}
Mathematics	math_double	100 is to 200 as 16 is to	32	x	0.61	0	0	{'x': 0.61, '': 0.17, 'what': 0.08, 'X': 0.06, 'y': 0.04}	2062	3.84171e-08	0.609375	0.979452	original		0.02	FALSE	FALSE	FALSE	out-of-context	{}
Mathematics	math_double	90 is to 180 as 85 is to	170	x	0.61	0	0	{'x': 0.61, 'y': 0.11, 'what': 0.11, '': 0.08, 'X': 0.03}	1413	9.35979e-08	0.605469	0.98592	original		0.02	FALSE	FALSE	FALSE	out-of-context	{}
Mathematics	math_double	95 is to 190 as 28 is to	56	x	0.61	0	0	{'x': 0.61, 'y': 0.11, 'what': 0.09, '': 0.08, '\\(': 0.03}	5321	1.88593e-08	0.605469	0.946977	original		0.02	FALSE	FALSE	FALSE	out-of-context	{}
Mathematics	math_double	95 is to 190 as 72 is to	144	x	0.61	0	0	{'x': 0.61, 'y': 0.15, 'what': 0.09, '\\(': 0.05, '': 0.05}	8330	9.8953e-09	0.605469	0.916992	original		0.02	FALSE	FALSE	FALSE	out-of-context	{}
Mathematics	math_double	60 is to 120 as 52 is to	104	x	0.61	0	0	{'x': 0.61, 'y': 0.14, 'what': 0.08, '': 0.07, 'X': 0.04}	6858	5.50062e-09	0.613281	0.931661	original		0.02	FALSE	FALSE	FALSE	out-of-context	{}
Mathematics	math_double	65 is to 130 as 72 is to	144	x	0.61	0	0	{'x': 0.61, 'y': 0.2, 'what': 0.07, '\\(': 0.04, '': 0.03}	6272	8.26549e-09	0.609375	0.9375	original		0.02	FALSE	FALSE	FALSE	out-of-context	{}
Mathematics	math_division2	32 is to 16 as 64 is to	32	x	0.61	0	0	{'x': 0.61, 'y': 0.11, 'what': 0.09, '': 0.07, 'X': 0.04}	1961	1.25729e-07	0.613281	0.980459	original		0.02	FALSE	FALSE	FALSE	out-of-context	{}
Mathematics	math_division2	38 is to 19 as 80 is to	40	x	0.61	0	0	{'x': 0.61, 'y': 0.19, 'what': 0.07, 'X': 0.04, '': 0.03}	1654	8.47504e-08	0.605469	0.983518	original		0.02	FALSE	FALSE	FALSE	out-of-context	{}
Mathematics	math_division2	36 is to 18 as 62 is to	31	x	0.61	0	0	{'x': 0.61, 'y': 0.14, '': 0.1, 'what': 0.08, 'X': 0.03}	6214	7.10133e-09	0.605469	0.938078	original		0.02	FALSE	FALSE	FALSE	out-of-context	{}
Mathematics	math_division2	52 is to 26 as 80 is to	40	x	0.61	0	0	{'x': 0.61, 'y': 0.18, 'what': 0.09, 'X': 0.03, '\\(': 0.03}	1380	7.35745e-08	0.613281	0.986248	original		0.02	FALSE	FALSE	FALSE	out-of-context	{}
Mathematics	math_division2	40 is to 20 as 46 is to	23	x	0.61	0	0	{'x': 0.61, 'y': 0.12, '': 0.11, 'what': 0.08, 'X': 0.04}	2427	3.67872e-08	0.609375	0.975815	original		0.02	FALSE	FALSE	FALSE	out-of-context	{}
Mathematics	math_division2	46 is to 23 as 80 is to	40	x	0.61	0	0	{'x': 0.61, 'y': 0.21, 'what': 0.05, '\\(': 0.03, 'X': 0.03}	1887	5.12227e-08	0.609375	0.981196	original		0.02	FALSE	FALSE	FALSE	out-of-context	{}
Mathematics	math_division2	48 is to 24 as 64 is to	32	x	0.61	0	0	{'x': 0.61, 'y': 0.16, 'what': 0.1, '': 0.05, '\\(': 0.02}	3362	3.28291e-08	0.605469	0.966498	original		0.02	FALSE	FALSE	FALSE	out-of-context	{}
Mathematics	math_division2	16 is to 8 as 94 is to	47	x	0.61	0	0	{'x': 0.61, 'y': 0.13, '': 0.11, 'what': 0.08, 'X': 0.02}	3800	3.21306e-08	0.605469	0.962133	original		0.02	FALSE	FALSE	FALSE	out-of-context	{}
Mathematics	math_division2	16 is to 8 as 76 is to	38	x	0.61	0	0	{'x': 0.61, 'y': 0.13, 'what': 0.12, '': 0.08, 'X': 0.02}	8521	7.97445e-09	0.609375	0.915089	original		0.02	FALSE	FALSE	FALSE	out-of-context	{}
Mathematics	math_division2	16 is to 8 as 64 is to	32	x	0.61	0	0	{'x': 0.61, 'y': 0.19, 'what': 0.09, '': 0.04, 'X': 0.02}	3862	2.71248e-08	0.605469	0.961515	original		0.02	FALSE	FALSE	FALSE	out-of-context	{}
Mathematics	math_division2	22 is to 11 as 64 is to	32	x	0.61	0	0	{'x': 0.61, 'y': 0.16, 'what': 0.08, '': 0.04, '\\(': 0.02}	5821	2.2701e-08	0.613281	0.941994	original		0.02	FALSE	FALSE	FALSE	out-of-context	{}
Mathematics	math_division2	96 is to 48 as 50 is to	25	x	0.61	0	0	{'x': 0.61, 'y': 0.13, 'what': 0.08, '': 0.08, 'X': 0.03}	1487	1.10827e-07	0.613281	0.985182	original		0.02	FALSE	FALSE	FALSE	out-of-context	{}
Mathematics	math_division2	90 is to 45 as 28 is to	14	x	0.61	0	0	{'x': 0.61, 'y': 0.13, 'what': 0.08, '': 0.08, 'X': 0.03}	1439	9.82545e-08	0.609375	0.98566	original		0.02	FALSE	FALSE	FALSE	out-of-context	{}
Mathematics	math_division2	80 is to 40 as 58 is to	29	x	0.61	0	0	{'x': 0.61, 'y': 0.12, '': 0.12, 'what': 0.07, 'X': 0.03}	4808	1.52504e-08	0.605469	0.952089	original		0.02	FALSE	FALSE	FALSE	out-of-context	{}
Mathematics	math_double	35 is to 70 as 28 is to	56	x	0.6	0	0	{'x': 0.6, 'y': 0.16, 'what': 0.09, '': 0.06, '\\(': 0.03}	3064	2.25846e-08	0.597656	0.969467	original		0.02	FALSE	FALSE	FALSE	out-of-context	{}
Mathematics	math_double	6 is to 12 as 85 is to	170	x	0.6	0	0	{'x': 0.6, 'y': 0.12, 'what': 0.09, '': 0.08, 'X': 0.05}	6848	1.45519e-08	0.597656	0.93176	original		0.02	FALSE	FALSE	FALSE	out-of-context	{}
Mathematics	math_double	12 is to 24 as 20 is to	40	x	0.6	0	0	{'x': 0.6, 'what': 0.14, 'y': 0.12, '': 0.06, 'X': 0.04}	775	1.67638e-07	0.601562	0.992277	original		0.02	FALSE	FALSE	FALSE	out-of-context	{}
Mathematics	math_division2	32 is to 16 as 60 is to	30	x	0.6	0	0	{'x': 0.6, 'what': 0.14, 'y': 0.09, '': 0.07, 'X': 0.04}	1795	1.06636e-07	0.601562	0.982113	original		0.02	FALSE	FALSE	FALSE	out-of-context	{}
Mathematics	math_division2	24 is to 12 as 34 is to	17	x	0.6	0	0	{'x': 0.6, 'what': 0.16, 'y': 0.09, '': 0.07, 'X': 0.02}	1114	1.28523e-07	0.601562	0.988899	original		0.02	FALSE	FALSE	FALSE	out-of-context	{}
Mathematics	math_division2	56 is to 28 as 80 is to	40	x	0.6	0	0	{'x': 0.6, 'y': 0.19, 'what': 0.09, '': 0.04, '\\(': 0.02}	1132	8.6613e-08	0.597656	0.98872	original		0.02	FALSE	FALSE	FALSE	out-of-context	{}
Mathematics	math_division2	46 is to 23 as 96 is to	48	x	0.6	0	0	{'x': 0.6, 'y': 0.21, 'what': 0.06, 'X': 0.03, '': 0.03}	2522	2.89874e-08	0.601562	0.974868	original		0.02	FALSE	FALSE	FALSE	out-of-context	{}
Mathematics	math_squares	6 is to 36 as 25 is to	625	x	0.6	0	0	{'x': 0.6, 'what': 0.13, 'y': 0.12, '': 0.05, 'X': 0.04}	13098	4.30737e-09	0.601562	0.869479	original		0.02	FALSE	FALSE	FALSE	out-of-context	{}
Mathematics	math_division2	6 is to 3 as 46 is to	23	x	0.6	0	0	{'x': 0.6, 'y': 0.12, 'what': 0.11, '': 0.08, 'X': 0.03}	3625	3.79514e-08	0.601562	0.963877	original		0.02	FALSE	FALSE	FALSE	out-of-context	{}
Mathematics	math_double	5 is to 10 as 20 is to	40	x	0.6	0	0	{'x': 0.6, 'y': 0.15, 'what': 0.12, 'X': 0.04, '': 0.03}	834	1.44355e-07	0.597656	0.991689	original		0.02	FALSE	FALSE	FALSE	out-of-context	{}
Mathematics	math_division2	60 is to 30 as 76 is to	38	x	0.6	0	0	{'x': 0.6, 'y': 0.17, 'what': 0.09, '': 0.07, 'X': 0.04}	6148	5.82077e-09	0.601562	0.938736	original		0.02	FALSE	FALSE	FALSE	out-of-context	{}
Mathematics	math_double	35 is to 70 as 85 is to	170	x	0.59	0	0	{'x': 0.59, 'y': 0.15, 'what': 0.09, '': 0.07, '\\(': 0.03}	1889	4.5402e-08	0.589844	0.981176	original		0.02	FALSE	FALSE	FALSE	out-of-context	{}
Mathematics	math_double	30 is to 60 as 56 is to	112	x	0.59	0	0	{'x': 0.59, 'y': 0.13, '': 0.1, 'what': 0.09, 'X': 0.04}	8720	5.03496e-09	0.59375	0.913106	original		0.02	FALSE	FALSE	FALSE	out-of-context	{}
Mathematics	math_double	50 is to 100 as 16 is to	32	x	0.59	0	0	{'x': 0.59, '': 0.15, 'y': 0.08, 'what': 0.08, 'X': 0.04}	4113	2.11876e-08	0.585937	0.959014	original		0.02	FALSE	FALSE	FALSE	out-of-context	{}
Mathematics	math_double	50 is to 100 as 85 is to	170	x	0.59	0	0	{'x': 0.59, 'what': 0.13, 'y': 0.09, '': 0.08, 'X': 0.05}	2407	3.67872e-08	0.589844	0.976014	original		0.02	FALSE	FALSE	FALSE	out-of-context	{}
Mathematics	math_double	12 is to 24 as 65 is to	130	x	0.59	0	0	{'x': 0.59, '': 0.12, 'what': 0.1, 'y': 0.08, 'X': 0.06}	5541	1.35042e-08	0.585937	0.944784	original		0.02	FALSE	FALSE	FALSE	out-of-context	{}
Mathematics	math_double	85 is to 170 as 20 is to	40	x	0.59	0	0	{'x': 0.59, 'what': 0.12, '': 0.11, 'y': 0.09, 'X': 0.04}	980	2.06754e-07	0.589844	0.990234	original		0.02	FALSE	FALSE	FALSE	out-of-context	{}
Mathematics	math_double	90 is to 180 as 16 is to	32	x	0.59	0	0	{'x': 0.59, '': 0.15, 'what': 0.08, 'y': 0.08, 'X': 0.04}	2863	3.79514e-08	0.59375	0.97147	original		0.02	FALSE	FALSE	FALSE	out-of-context	{}
Mathematics	math_double	65 is to 130 as 16 is to	32	x	0.59	0	0	{'x': 0.59, '': 0.15, 'what': 0.09, 'y': 0.09, 'X': 0.04}	3124	2.09548e-08	0.59375	0.96887	original		0.02	FALSE	FALSE	FALSE	out-of-context	{}
Mathematics	math_double	65 is to 130 as 85 is to	170	x	0.59	0	0	{'x': 0.59, 'y': 0.13, 'what': 0.12, '': 0.07, '\\(': 0.03}	857	1.13621e-07	0.59375	0.99146	original		0.02	FALSE	FALSE	FALSE	out-of-context	{}
Mathematics	math_division2	32 is to 16 as 76 is to	38	x	0.59	0	0	{'x': 0.59, 'what': 0.15, '': 0.09, 'y': 0.07, 'X': 0.05}	6026	1.50176e-08	0.589844	0.939951	original		0.02	FALSE	FALSE	FALSE	out-of-context	{}
Mathematics	math_division2	54 is to 27 as 80 is to	40	x	0.59	0	0	{'x': 0.59, 'y': 0.21, 'what': 0.07, '': 0.04, '\\(': 0.03}	1647	6.23986e-08	0.585937	0.983588	original		0.02	FALSE	FALSE	FALSE	out-of-context	{}
Mathematics	math_division2	42 is to 21 as 80 is to	40	x	0.59	0	0	{'x': 0.59, 'y': 0.2, 'what': 0.08, '\\(': 0.04, '': 0.04}	2353	4.1211e-08	0.585937	0.976553	original		0.02	FALSE	FALSE	FALSE	out-of-context	{}
Mathematics	math_division2	48 is to 24 as 62 is to	31	x	0.59	0	0	{'x': 0.59, 'y': 0.13, 'what': 0.11, '': 0.08, 'X': 0.03}	6187	1.13505e-08	0.589844	0.938347	original		0.02	FALSE	FALSE	FALSE	out-of-context	{}
Mathematics	math_division2	48 is to 24 as 50 is to	25	x	0.59	0	0	{'x': 0.59, 'y': 0.15, 'what': 0.07, '': 0.06, 'X': 0.04}	1779	1.20141e-07	0.585937	0.982272	original		0.02	FALSE	FALSE	FALSE	out-of-context	{}
Mathematics	math_squares	25 is to 625 as 5 is to	25	x	0.59	0	0	{'x': 0.59, '': 0.16, 'what': 0.11, 'X': 0.04, 'y': 0.03}	651	4.32134e-07	0.589843	0.993513	original		0.02	FALSE	FALSE	FALSE	out-of-context	{}
Mathematics	math_division2	18 is to 9 as 76 is to	38	x	0.59	0	0	{'x': 0.59, 'y': 0.16, 'what': 0.1, '': 0.06, 'X': 0.03}	8446	7.13044e-09	0.589844	0.915836	original		0.02	FALSE	FALSE	FALSE	out-of-context	{}
Mathematics	math_division2	12 is to 6 as 46 is to	23	x	0.59	0	0	{'x': 0.59, 'y': 0.14, '': 0.11, 'what': 0.08, 'X': 0.03}	2961	3.51574e-08	0.589844	0.970494	original		0.02	FALSE	FALSE	FALSE	out-of-context	{}
Mathematics	math_double	2 is to 4 as 20 is to	40	x	0.59	0	0	{'x': 0.59, 'y': 0.11, 'what': 0.09, 'X': 0.08, '': 0.07}	1327	1.38767e-07	0.589844	0.986777	original		0.02	FALSE	FALSE	FALSE	out-of-context	{}
Mathematics	math_division5	55 is to 11 as 100 is to	20	x	0.59	0	0	{'x': 0.59, 'what': 0.12, 'y': 0.11, '': 0.07, '\\(': 0.03}	2257	1.00583e-07	0.585937	0.977509	original		0.02	FALSE	FALSE	FALSE	out-of-context	{}
Mathematics	math_division2	72 is to 36 as 76 is to	38	x	0.59	0	0	{'x': 0.59, 'y': 0.15, 'what': 0.11, '': 0.07, '\\(': 0.03}	6914	9.60426e-09	0.585937	0.931103	original		0.02	FALSE	FALSE	FALSE	out-of-context	{}
Mathematics	math_division2	86 is to 43 as 76 is to	38	x	0.59	0	0	{'x': 0.59, 'y': 0.2, 'what': 0.06, '': 0.05, 'X': 0.03}	7124	7.97445e-09	0.585937	0.92901	original		0.02	FALSE	FALSE	FALSE	out-of-context	{}
Mathematics	math_double	40 is to 80 as 56 is to	112	x	0.58	0	0	{'x': 0.58, 'y': 0.15, '': 0.1, 'what': 0.09, 'X': 0.04}	6785	8.44011e-09	0.582031	0.932388	original		0.02	FALSE	FALSE	FALSE	out-of-context	{}
Mathematics	math_double	52 is to 104 as 24 is to	48	x	0.58	0	0	{'x': 0.58, 'what': 0.18, 'X': 0.06, 'y': 0.06, '': 0.05}	1130	1.57394e-07	0.582031	0.98874	original		0.02	FALSE	FALSE	FALSE	out-of-context	{}
Mathematics	math_double	52 is to 104 as 28 is to	56	x	0.58	0	0	{'x': 0.58, 'what': 0.18, 'y': 0.08, '': 0.06, 'X': 0.05}	1548	8.98726e-08	0.582031	0.984574	original		0.02	FALSE	FALSE	FALSE	out-of-context	{}
Mathematics	math_double	72 is to 144 as 28 is to	56	x	0.58	0	0	{'x': 0.58, 'what': 0.16, 'y': 0.09, '': 0.09, 'X': 0.02}	2294	4.63333e-08	0.582031	0.97714	original		0.02	FALSE	FALSE	FALSE	out-of-context	{}
Mathematics	math_division2	34 is to 17 as 46 is to	23	x	0.58	0	0	{'x': 0.58, 'y': 0.18, '': 0.07, 'what': 0.06, 'X': 0.03}	1001	2.02097e-07	0.582031	0.990025	original		0.02	FALSE	FALSE	FALSE	out-of-context	{}
Mathematics	math_division2	38 is to 19 as 76 is to	38	x	0.58	0	0	{'x': 0.58, 'y': 0.16, 'what': 0.11, 'X': 0.05, '': 0.05}	3964	2.11876e-08	0.578125	0.960499	original		0.02	FALSE	FALSE	FALSE	out-of-context	{}
Mathematics	math_division2	38 is to 19 as 70 is to	35	x	0.58	0	0	{'x': 0.58, 'y': 0.2, 'what': 0.07, 'X': 0.04, '': 0.04}	4246	2.5495e-08	0.582031	0.957689	original		0.02	FALSE	FALSE	FALSE	out-of-context	{}
Mathematics	math_division2	6 is to 3 as 62 is to	31	x	0.58	0	0	{'x': 0.58, 'y': 0.14, 'what': 0.11, '': 0.08, 'X': 0.03}	8250	1.26893e-08	0.582031	0.917789	original		0.02	FALSE	FALSE	FALSE	out-of-context	{}
Mathematics	math_division2	86 is to 43 as 64 is to	32	x	0.58	0	0	{'x': 0.58, 'y': 0.22, 'what': 0.05, '': 0.03, 'X': 0.03}	4741	1.61817e-08	0.582031	0.952756	original		0.02	FALSE	FALSE	FALSE	out-of-context	{}
Mathematics	math_division2	86 is to 43 as 34 is to	17	x	0.58	0	0	{'x': 0.58, 'y': 0.19, 'what': 0.07, '': 0.05, '\\(': 0.03}	1939	5.44824e-08	0.582031	0.980678	original		0.02	FALSE	FALSE	FALSE	out-of-context	{}
Mathematics	math_division2	80 is to 40 as 46 is to	23	x	0.58	0	0	{'x': 0.58, '': 0.16, 'y': 0.11, 'what': 0.06, 'X': 0.04}	4404	1.95578e-08	0.578125	0.956114	original		0.02	FALSE	FALSE	FALSE	out-of-context	{}
Mathematics	math_double	35 is to 70 as 72 is to	144	x	0.57	0	0	{'x': 0.57, 'y': 0.23, 'what': 0.08, '\\(': 0.04, '': 0.03}	7597	7.45058e-09	0.566406	0.924296	original		0.02	FALSE	FALSE	FALSE	out-of-context	{}
Mathematics	math_double	45 is to 90 as 30 is to	60	x	0.57	0	0	{'x': 0.57, 'y': 0.16, 'what': 0.12, '': 0.05, '\\(': 0.03}	625	2.21655e-07	0.570312	0.993772	original		0.02	FALSE	FALSE	FALSE	out-of-context	{}
Mathematics	math_double	8 is to 16 as 16 is to	32		0.57	0	0	{'': 0.57, 'x': 0.14, 'what': 0.06, 'X': 0.05, 'y': 0.03}	864	1.60933e-06	0.570311	0.99139	original		0.02	FALSE	FALSE	FALSE	out-of-context	{}
Mathematics	math_double	20 is to 40 as 85 is to	170	x	0.57	0	0	{'x': 0.57, '': 0.13, 'y': 0.11, 'what': 0.09, 'X': 0.05}	1574	5.30854e-08	0.574219	0.984315	original		0.02	FALSE	FALSE	FALSE	out-of-context	{}
Mathematics	math_double	84 is to 168 as 20 is to	40	x	0.57	0	0	{'x': 0.57, 'what': 0.12, '': 0.12, 'y': 0.07, 'X': 0.07}	914	2.19792e-07	0.574219	0.990892	original		0.02	FALSE	FALSE	FALSE	out-of-context	{}
Mathematics	math_double	95 is to 190 as 16 is to	32	x	0.57	0	0	{'x': 0.57, '': 0.16, 'what': 0.08, 'y': 0.07, 'X': 0.04}	5389	2.89874e-08	0.570312	0.946299	original		0.02	FALSE	FALSE	FALSE	out-of-context	{}
Mathematics	math_double	72 is to 144 as 16 is to	32	x	0.57	0	0	{'x': 0.57, '': 0.13, 'what': 0.12, 'y': 0.09, 'X': 0.02}	3323	3.72529e-08	0.574219	0.966887	original		0.02	FALSE	FALSE	FALSE	out-of-context	{}
Mathematics	math_division2	32 is to 16 as 94 is to	47	x	0.57	0	0	{'x': 0.57, 'what': 0.13, '': 0.11, 'y': 0.08, 'X': 0.04}	3642	3.95812e-08	0.570312	0.963708	original		0.02	FALSE	FALSE	FALSE	out-of-context	{}
Mathematics	math_division2	26 is to 13 as 46 is to	23	x	0.57	0	0	{'x': 0.57, 'y': 0.15, 'what': 0.1, '': 0.07, 'X': 0.04}	1503	9.63919e-08	0.574219	0.985023	original		0.02	FALSE	FALSE	FALSE	out-of-context	{}
Mathematics	math_division2	48 is to 24 as 34 is to	17	x	0.57	0	0	{'x': 0.57, 'what': 0.17, 'y': 0.1, '': 0.08, 'X': 0.03}	2094	7.07805e-08	0.566406	0.979133	original		0.02	FALSE	FALSE	FALSE	out-of-context	{}
Mathematics	math_division2	46 is to 23 as 70 is to	35	x	0.57	0	0	{'x': 0.57, 'y': 0.23, 'what': 0.06, '\\(': 0.04, '': 0.03}	4305	1.75787e-08	0.570312	0.957101	original		0.02	FALSE	FALSE	FALSE	out-of-context	{}
Mathematics	math_division2	4 is to 2 as 94 is to	47	x	0.57	0	0	{'x': 0.57, '': 0.12, 'y': 0.1, 'what': 0.08, 'X': 0.04}	4029	5.89062e-08	0.574219	0.959851	original		0.02	FALSE	FALSE	FALSE	out-of-context	{}
Mathematics	math_squares	10 is to 100 as 25 is to	625	x	0.57	0	0	{'x': 0.57, 'y': 0.13, 'what': 0.12, 'X': 0.07, '': 0.03}	10103	4.5402e-09	0.570312	0.899324	original		0.02	FALSE	FALSE	FALSE	out-of-context	{}
Mathematics	math_squares	18 is to 324 as 25 is to	625	x	0.57	0	0	{'x': 0.57, 'what': 0.18, 'y': 0.1, '': 0.06, 'X': 0.03}	6681	1.3737e-08	0.566406	0.933424	original		0.02	FALSE	FALSE	FALSE	out-of-context	{}
Mathematics	math_division2	96 is to 48 as 26 is to	13	x	0.57	0	0	{'x': 0.57, 'y': 0.13, '': 0.11, 'what': 0.09, 'X': 0.03}	3265	5.09899e-08	0.574219	0.967465	original		0.02	FALSE	FALSE	FALSE	out-of-context	{}
Mathematics	math_division2	86 is to 43 as 62 is to	31	x	0.57	0	0	{'x': 0.57, 'y': 0.2, 'what': 0.06, '': 0.05, 'X': 0.03}	4657	1.3446e-08	0.574219	0.953593	original		0.02	FALSE	FALSE	FALSE	out-of-context	{}
Mathematics	math_division2	78 is to 39 as 26 is to	13	x	0.57	0	0	{'x': 0.57, 'y': 0.15, 'what': 0.1, '': 0.09, 'X': 0.02}	1731	9.26666e-08	0.570312	0.982751	original		0.02	FALSE	FALSE	FALSE	out-of-context	{}
Mathematics	math_division2	74 is to 37 as 96 is to	48	x	0.57	0	0	{'x': 0.57, 'y': 0.23, 'what': 0.06, 'X': 0.03, '': 0.03}	2302	3.86499e-08	0.570312	0.977061	original		0.02	FALSE	FALSE	FALSE	out-of-context	{}
Mathematics	math_double	38 is to 76 as 20 is to	40	x	0.56	0	0	{'x': 0.56, 'what': 0.15, 'y': 0.1, '': 0.08, 'X': 0.05}	710	3.37139e-07	0.558593	0.992925	original		0.02	FALSE	FALSE	FALSE	out-of-context	{}
Mathematics	math_double	36 is to 72 as 56 is to	112	x	0.56	0	0	{'x': 0.56, 'what': 0.16, 'y': 0.14, '': 0.06, 'X': 0.02}	8434	5.64614e-09	0.558594	0.915956	original		0.02	FALSE	FALSE	FALSE	out-of-context	{}
Mathematics	math_double	80 is to 160 as 85 is to	170	x	0.56	0	0	{'x': 0.56, '': 0.17, 'y': 0.09, 'what': 0.09, 'X': 0.04}	662	2.49594e-07	0.5625	0.993403	original		0.02	FALSE	FALSE	FALSE	out-of-context	{}
Mathematics	math_double	78 is to 156 as 20 is to	40	x	0.56	0	0	{'x': 0.56, 'what': 0.17, '': 0.11, 'y': 0.07, 'X': 0.05}	1088	1.38767e-07	0.5625	0.989158	original		0.02	FALSE	FALSE	FALSE	out-of-context	{}
Mathematics	math_double	96 is to 192 as 24 is to	48	x	0.56	0	0	{'x': 0.56, 'what': 0.16, 'y': 0.08, '': 0.08, '\\(': 0.03}	1536	1.01514e-07	0.5625	0.984694	original		0.02	FALSE	FALSE	FALSE	out-of-context	{}
Mathematics	math_double	70 is to 140 as 16 is to	32	x	0.56	0	0	{'x': 0.56, '': 0.24, 'what': 0.06, 'y': 0.05, 'X': 0.04}	3547	2.38651e-08	0.5625	0.964654	original		0.02	FALSE	FALSE	FALSE	out-of-context	{}
Mathematics	math_division2	36 is to 18 as 46 is to	23	x	0.56	0	0	{'x': 0.56, '': 0.14, 'y': 0.13, 'what': 0.09, 'X': 0.03}	1767	5.54137e-08	0.558594	0.982392	original		0.02	FALSE	FALSE	FALSE	out-of-context	{}
Mathematics	math_division2	44 is to 22 as 80 is to	40	x	0.56	0	0	{'x': 0.56, 'y': 0.2, 'what': 0.12, '': 0.04, '\\(': 0.03}	1893	6.37956e-08	0.558594	0.981136	original		0.02	FALSE	FALSE	FALSE	out-of-context	{}
Mathematics	math_squares	22 is to 484 as 26 is to	676	x	0.56	0	0	{'x': 0.56, 'what': 0.19, 'y': 0.11, '': 0.05, 'X': 0.04}	11673	6.51926e-09	0.558594	0.883679	original		0.02	FALSE	FALSE	FALSE	out-of-context	{}
Mathematics	math_cubes	6 is to 216 as 8 is to	512	x	0.56	0	0	{'x': 0.56, 'what': 0.19, '': 0.08, 'y': 0.08, 'X': 0.03}	6469	2.38651e-08	0.558594	0.935537	original		0.02	FALSE	FALSE	FALSE	out-of-context	{}
Mathematics	math_squares	5 is to 25 as 12 is to	144	x	0.56	0	0	{'x': 0.56, 'what': 0.15, 'y': 0.13, '': 0.06, 'X': 0.05}	6672	7.74162e-09	0.5625	0.933514	original		0.02	FALSE	FALSE	FALSE	out-of-context	{}
Mathematics	math_division2	16 is to 8 as 62 is to	31	x	0.56	0	0	{'x': 0.56, 'y': 0.15, 'what': 0.12, '': 0.1, 'X': 0.03}	6190	1.44937e-08	0.558594	0.938317	original		0.02	FALSE	FALSE	FALSE	out-of-context	{}
Mathematics	math_division2	94 is to 47 as 26 is to	13	x	0.56	0	0	{'x': 0.56, 'y': 0.15, 'what': 0.1, '': 0.08, 'X': 0.03}	2063	8.14907e-08	0.5625	0.979442	original		0.02	FALSE	FALSE	FALSE	out-of-context	{}
Mathematics	math_division2	96 is to 48 as 76 is to	38	x	0.56	0	0	{'x': 0.56, 'y': 0.14, 'what': 0.13, '': 0.09, 'X': 0.02}	6817	1.14669e-08	0.558594	0.932069	original		0.02	FALSE	FALSE	FALSE	out-of-context	{}
Mathematics	math_division2	60 is to 30 as 70 is to	35	x	0.56	0	0	{'x': 0.56, 'y': 0.22, 'what': 0.08, '': 0.06, 'X': 0.03}	1281	6.0536e-08	0.558594	0.987235	original		0.02	FALSE	FALSE	FALSE	out-of-context	{}
Mathematics	math_division2	88 is to 44 as 26 is to	13	x	0.56	0	0	{'x': 0.56, 'y': 0.13, '': 0.11, 'what': 0.1, '\\(': 0.02}	1739	1.51806e-07	0.5625	0.982671	original		0.02	FALSE	FALSE	FALSE	out-of-context	{}
Mathematics	math_division2	90 is to 45 as 46 is to	23	x	0.56	0	0	{'x': 0.56, 'y': 0.13, '': 0.11, 'what': 0.07, 'X': 0.04}	4321	2.38651e-08	0.558594	0.956942	original		0.02	FALSE	FALSE	FALSE	out-of-context	{}
Mathematics	math_division2	76 is to 38 as 96 is to	48	x	0.56	0	0	{'x': 0.56, 'y': 0.27, 'what': 0.07, '': 0.03, '\\(': 0.02}	1778	5.00586e-08	0.5625	0.982282	original		0.02	FALSE	FALSE	FALSE	out-of-context	{}
Mathematics	math_double	54 is to 108 as 20 is to	40	x	0.55	0	0	{'x': 0.55, 'what': 0.17, '': 0.11, 'y': 0.09, 'X': 0.04}	976	1.77883e-07	0.546875	0.990274	original		0.02	FALSE	FALSE	FALSE	out-of-context	{}
Mathematics	math_double	12 is to 24 as 85 is to	170	x	0.55	0	0	{'x': 0.55, 'what': 0.16, '': 0.12, 'y': 0.08, 'X': 0.04}	4584	1.88593e-08	0.546875	0.954321	original		0.02	FALSE	FALSE	FALSE	out-of-context	{}
Mathematics	math_double	24 is to 48 as 85 is to	170	x	0.55	0	0	{'x': 0.55, 'what': 0.14, '': 0.11, 'y': 0.09, 'X': 0.05}	3859	2.84053e-08	0.546875	0.961545	original		0.02	FALSE	FALSE	FALSE	out-of-context	{}
Mathematics	math_double	26 is to 52 as 85 is to	170	x	0.55	0	0	{'x': 0.55, 'y': 0.13, 'what': 0.13, '': 0.06, 'X': 0.06}	2435	7.12462e-08	0.546875	0.975735	original		0.02	FALSE	FALSE	FALSE	out-of-context	{}
Mathematics	math_double	86 is to 172 as 28 is to	56	x	0.55	0	0	{'x': 0.55, 'what': 0.18, 'y': 0.12, '': 0.08, 'X': 0.02}	1274	1.35042e-07	0.554687	0.987305	original		0.02	FALSE	FALSE	FALSE	out-of-context	{}
Mathematics	math_double	80 is to 160 as 16 is to	32	x	0.55	0	0	{'x': 0.55, '': 0.23, 'what': 0.07, 'y': 0.05, 'X': 0.05}	2259	6.14673e-08	0.554687	0.977489	original		0.02	FALSE	FALSE	FALSE	out-of-context	{}
Mathematics	math_double	55 is to 110 as 20 is to	40	x	0.55	0	0	{'x': 0.55, 'what': 0.16, 'y': 0.11, '': 0.09, 'X': 0.03}	509	4.48897e-07	0.546875	0.994928	original		0.02	FALSE	FALSE	FALSE	out-of-context	{}
Mathematics	math_double	74 is to 148 as 20 is to	40	x	0.55	0	0	{'x': 0.55, 'what': 0.21, 'y': 0.08, '': 0.08, 'X': 0.04}	1108	1.11293e-07	0.550781	0.988959	original		0.02	FALSE	FALSE	FALSE	out-of-context	{}
Mathematics	math_division2	32 is to 16 as 46 is to	23	x	0.55	0	0	{'x': 0.55, 'what': 0.12, '': 0.12, 'y': 0.08, 'X': 0.06}	1253	1.70432e-07	0.546875	0.987514	original		0.02	FALSE	FALSE	FALSE	out-of-context	{}
Mathematics	math_division2	44 is to 22 as 2 is to	1	x	0.55	0	0	{'x': 0.55, '': 0.26, 'what': 0.07, 'y': 0.03, 'X': 0.03}	237	5.06639e-06	0.550776	0.997638	original		0.02	FALSE	FALSE	FALSE	out-of-context	{}
Mathematics	math_division2	42 is to 21 as 76 is to	38	x	0.55	0	0	{'x': 0.55, 'y': 0.17, 'what': 0.12, '': 0.07, '\\(': 0.03}	7075	6.78119e-09	0.550781	0.929498	original		0.02	FALSE	FALSE	FALSE	out-of-context	{}
Mathematics	math_squares	4 is to 16 as 25 is to	625	x	0.55	0	0	{'x': 0.55, 'what': 0.13, 'y': 0.12, 'X': 0.07, '': 0.06}	9467	8.3237e-09	0.546875	0.905662	original		0.02	FALSE	FALSE	FALSE	out-of-context	{}
Mathematics	math_division2	16 is to 8 as 26 is to	13	x	0.55	0	0	{'x': 0.55, 'y': 0.23, 'what': 0.1, '': 0.06, 'X': 0.02}	926	1.71363e-07	0.550781	0.990772	original		0.02	FALSE	FALSE	FALSE	out-of-context	{}
Mathematics	math_division2	12 is to 6 as 62 is to	31	x	0.55	0	0	{'x': 0.55, 'y': 0.14, '': 0.13, 'what': 0.09, 'X': 0.02}	8026	1.13505e-08	0.554687	0.920022	original		0.02	FALSE	FALSE	FALSE	out-of-context	{}
Mathematics	math_division2	94 is to 47 as 80 is to	40	x	0.55	0	0	{'x': 0.55, 'y': 0.19, 'what': 0.1, '\\(': 0.04, '': 0.03}	1737	9.26666e-08	0.554687	0.982691	original		0.02	FALSE	FALSE	FALSE	out-of-context	{}
Mathematics	math_double	2 is to 4 as 16 is to	32	x	0.55	0	0	{'x': 0.55, 'y': 0.12, 'what': 0.11, 'X': 0.08, '': 0.07}	3103	4.91273e-08	0.554687	0.969079	original		0.02	FALSE	FALSE	FALSE	out-of-context	{}
Mathematics	math_division2	66 is to 33 as 96 is to	48	x	0.55	0	0	{'x': 0.55, 'y': 0.19, 'what': 0.12, '': 0.05, 'X': 0.03}	2172	6.14673e-08	0.550781	0.978356	original		0.02	FALSE	FALSE	FALSE	out-of-context	{}
Mathematics	math_division2	66 is to 33 as 80 is to	40	x	0.55	0	0	{'x': 0.55, 'y': 0.18, 'what': 0.13, '': 0.04, 'X': 0.03}	1705	8.6613e-08	0.554687	0.98301	original		0.02	FALSE	FALSE	FALSE	out-of-context	{}
Mathematics	math_division2	72 is to 36 as 26 is to	13	x	0.55	0	0	{'x': 0.55, 'y': 0.15, 'what': 0.11, '': 0.11, '\\(': 0.03}	2493	6.42613e-08	0.550781	0.975157	original		0.02	FALSE	FALSE	FALSE	out-of-context	{}
Mathematics	math_division2	84 is to 42 as 50 is to	25	x	0.55	0	0	{'x': 0.55, 'y': 0.19, 'what': 0.11, '': 0.05, '\\(': 0.03}	1571	9.35979e-08	0.550781	0.984345	original		0.02	FALSE	FALSE	FALSE	out-of-context	{}
Mathematics	math_double	54 is to 108 as 2 is to	4	x	0.54	0	0	{'x': 0.54, '': 0.28, 'what': 0.11, 'y': 0.03, 'X': 0.02}	286	1.43796e-06	0.535155	0.99715	original		0.02	FALSE	FALSE	FALSE	out-of-context	{}
Mathematics	math_double	14 is to 28 as 56 is to	112	x	0.54	0	0	{'x': 0.54, 'what': 0.15, 'y': 0.14, 'X': 0.06, '': 0.04}	11037	3.95812e-09	0.539062	0.890017	original		0.02	FALSE	FALSE	FALSE	out-of-context	{}
Mathematics	math_double	14 is to 28 as 85 is to	170	x	0.54	0	0	{'x': 0.54, 'what': 0.15, 'y': 0.1, '': 0.08, 'X': 0.07}	3527	2.73576e-08	0.535156	0.964854	original		0.02	FALSE	FALSE	FALSE	out-of-context	{}
Mathematics	math_double	10 is to 20 as 72 is to	144	x	0.54	0	0	{'x': 0.54, 'what': 0.12, '': 0.11, 'y': 0.11, 'X': 0.06}	4190	2.16532e-08	0.539062	0.958247	original		0.02	FALSE	FALSE	FALSE	out-of-context	{}
Mathematics	math_double	26 is to 52 as 20 is to	40	x	0.54	0	0	{'x': 0.54, 'what': 0.18, 'y': 0.1, 'X': 0.06, '': 0.05}	698	3.81842e-07	0.535156	0.993044	original		0.02	FALSE	FALSE	FALSE	out-of-context	{}
Mathematics	math_double	26 is to 52 as 16 is to	32	x	0.54	0	0	{'x': 0.54, 'what': 0.16, 'y': 0.1, '': 0.09, 'X': 0.05}	1238	1.85333e-07	0.535156	0.987663	original		0.02	FALSE	FALSE	FALSE	out-of-context	{}
Mathematics	math_double	86 is to 172 as 20 is to	40	x	0.54	0	0	{'x': 0.54, 'what': 0.19, '': 0.1, 'y': 0.09, 'X': 0.03}	956	2.22586e-07	0.542969	0.990474	original		0.02	FALSE	FALSE	FALSE	out-of-context	{}
Mathematics	math_double	78 is to 156 as 30 is to	60	x	0.54	0	0	{'x': 0.54, 'what': 0.16, 'y': 0.11, '': 0.11, 'X': 0.04}	1435	9.96515e-08	0.535156	0.9857	original		0.02	FALSE	FALSE	FALSE	out-of-context	{}
Mathematics	math_double	96 is to 192 as 16 is to	32	x	0.54	0	0	{'x': 0.54, '': 0.16, 'what': 0.13, 'y': 0.07, 'the': 0.03}	1038	2.5332e-07	0.535156	0.989656	original		0.02	FALSE	FALSE	FALSE	out-of-context	{}
Mathematics	math_double	62 is to 124 as 20 is to	40	x	0.54	0	0	{'x': 0.54, 'what': 0.18, '': 0.1, 'y': 0.09, 'X': 0.04}	773	2.86847e-07	0.535156	0.992297	original		0.02	FALSE	FALSE	FALSE	out-of-context	{}
Mathematics	math_double	62 is to 124 as 16 is to	32	x	0.54	0	0	{'x': 0.54, 'what': 0.15, '': 0.13, 'y': 0.09, 'X': 0.04}	2582	5.42495e-08	0.539062	0.974271	original		0.02	FALSE	FALSE	FALSE	out-of-context	{}
Mathematics	math_double	58 is to 116 as 20 is to	40	x	0.54	0	0	{'x': 0.54, 'what': 0.2, '': 0.1, 'y': 0.07, 'X': 0.04}	1079	1.66707e-07	0.542969	0.989248	original		0.02	FALSE	FALSE	FALSE	out-of-context	{}
Mathematics	math_double	75 is to 150 as 16 is to	32	x	0.54	0	0	{'x': 0.54, '': 0.2, 'what': 0.09, 'X': 0.05, 'y': 0.04}	5058	1.66474e-08	0.542969	0.949597	original		0.02	FALSE	FALSE	FALSE	out-of-context	{}
Mathematics	math_double	76 is to 152 as 28 is to	56	x	0.54	0	0	{'x': 0.54, 'what': 0.22, 'y': 0.1, '': 0.08, 'X': 0.02}	1502	7.26432e-08	0.539062	0.985033	original		0.02	FALSE	FALSE	FALSE	out-of-context	{}
Mathematics	math_double	76 is to 152 as 20 is to	40	x	0.54	0	0	{'x': 0.54, 'what': 0.2, '': 0.09, 'y': 0.08, 'X': 0.04}	1104	1.51806e-07	0.539062	0.988999	original		0.02	FALSE	FALSE	FALSE	out-of-context	{}
Mathematics	math_double	68 is to 136 as 20 is to	40	x	0.54	0	0	{'x': 0.54, 'what': 0.17, '': 0.13, 'y': 0.06, 'X': 0.05}	525	4.52623e-07	0.539062	0.994768	original		0.02	FALSE	FALSE	FALSE	out-of-context	{}
Mathematics	math_division2	56 is to 28 as 76 is to	38	x	0.54	0	0	{'x': 0.54, 'y': 0.16, 'what': 0.15, '': 0.08, 'X': 0.03}	4333	1.47265e-08	0.539062	0.956822	original		0.02	FALSE	FALSE	FALSE	out-of-context	{}
Mathematics	math_division2	54 is to 27 as 76 is to	38	x	0.54	0	0	{'x': 0.54, 'y': 0.18, 'what': 0.11, '': 0.08, 'X': 0.03}	5444	1.15833e-08	0.542969	0.945751	original		0.02	FALSE	FALSE	FALSE	out-of-context	{}
Mathematics	math_division2	48 is to 24 as 26 is to	13	x	0.54	0	0	{'x': 0.54, 'y': 0.14, 'what': 0.13, '': 0.09, 'X': 0.03}	2780	5.75092e-08	0.535156	0.972298	original		0.02	FALSE	FALSE	FALSE	out-of-context	{}
Mathematics	math_squares	6 is to 36 as 12 is to	144	x	0.54	0	0	{'x': 0.54, 'y': 0.19, 'what': 0.11, '': 0.06, 'X': 0.04}	4814	2.31666e-08	0.542969	0.952029	original		0.02	FALSE	FALSE	FALSE	out-of-context	{}
Mathematics	math_squares	18 is to 324 as 26 is to	676	x	0.54	0	0	{'x': 0.54, 'what': 0.21, 'y': 0.12, '': 0.05, 'X': 0.03}	19362	1.78261e-09	0.539062	0.807059	original		0.02	FALSE	FALSE	FALSE	out-of-context	{}
Mathematics	math_squares	16 is to 256 as 26 is to	676	x	0.54	0	0	{'x': 0.54, 'what': 0.18, 'y': 0.12, '': 0.06, 'X': 0.04}	19677	2.19734e-09	0.535156	0.80392	original		0.02	FALSE	FALSE	FALSE	out-of-context	{}
Mathematics	math_division2	18 is to 9 as 46 is to	23	x	0.54	0	0	{'x': 0.54, 'y': 0.18, 'what': 0.12, '': 0.07, 'X': 0.03}	2629	3.79514e-08	0.542969	0.973802	original		0.02	FALSE	FALSE	FALSE	out-of-context	{}
Mathematics	math_division2	18 is to 9 as 64 is to	32	x	0.54	0	0	{'x': 0.54, 'y': 0.25, 'what': 0.09, '': 0.03, 'X': 0.02}	4709	1.96742e-08	0.539062	0.953075	original		0.02	FALSE	FALSE	FALSE	out-of-context	{}
Mathematics	math_division2	18 is to 9 as 62 is to	31	x	0.54	0	0	{'x': 0.54, 'y': 0.2, 'what': 0.12, '': 0.07, 'X': 0.02}	6898	9.37143e-09	0.535156	0.931262	original		0.02	FALSE	FALSE	FALSE	out-of-context	{}
Mathematics	math_double	5 is to 10 as 28 is to	56	x	0.54	0	0	{'x': 0.54, 'y': 0.18, 'what': 0.14, '': 0.05, 'X': 0.04}	3726	1.96742e-08	0.539062	0.962871	original		0.02	FALSE	FALSE	FALSE	out-of-context	{}
Mathematics	math_double	4 is to 8 as 74 is to	148	x	0.54	0	0	{'x': 0.54, 'what': 0.12, '': 0.12, 'y': 0.09, 'X': 0.05}	11525	1.01863e-08	0.539062	0.885154	original		0.02	FALSE	FALSE	FALSE	out-of-context	{}
Mathematics	math_division2	72 is to 36 as 46 is to	23	x	0.54	0	0	{'x': 0.54, '': 0.15, 'what': 0.12, 'y': 0.11, 'X': 0.02}	3066	3.46918e-08	0.542969	0.969448	original		0.02	FALSE	FALSE	FALSE	out-of-context	{}
Mathematics	math_division2	84 is to 42 as 60 is to	30	x	0.54	0	0	{'x': 0.54, 'y': 0.2, 'what': 0.13, '': 0.03, '\\(': 0.03}	4062	2.468e-08	0.535156	0.959522	original		0.02	FALSE	FALSE	FALSE	out-of-context	{}
Mathematics	math_division2	84 is to 42 as 80 is to	40	x	0.54	0	0	{'x': 0.54, 'y': 0.18, 'what': 0.11, '': 0.04, '\\(': 0.03}	2415	7.91624e-08	0.542969	0.975935	original		0.02	FALSE	FALSE	FALSE	out-of-context	{}
Semantic Hierarchies	hyponyms_misc	watercolor is to painting as spring is to	season	the	0.54	0	0	{'the': 0.54, 'seasons': 0.1, 'summer': 0.06, 'a': 0.03, 'nature': 0.03}	7	0.0142822	0.520874	0.99993	original		0.02	FALSE	FALSE	FALSE	out-of-context	{}
Mathematics	math_double	36 is to 72 as 28 is to	56	x	0.53	0	0	{'x': 0.53, 'what': 0.18, 'y': 0.15, '': 0.06, '\\(': 0.03}	2145	4.47035e-08	0.527344	0.978625	original		0.02	FALSE	FALSE	FALSE	out-of-context	{}
Mathematics	math_double	45 is to 90 as 28 is to	56	x	0.53	0	0	{'x': 0.53, 'what': 0.17, 'y': 0.13, '': 0.08, '\\(': 0.03}	2003	4.2608e-08	0.53125	0.98004	original		0.02	FALSE	FALSE	FALSE	out-of-context	{}
Mathematics	math_double	12 is to 24 as 28 is to	56	x	0.53	0	0	{'x': 0.53, 'y': 0.16, 'what': 0.15, '': 0.06, 'X': 0.04}	2532	3.32948e-08	0.527344	0.974769	original		0.02	FALSE	FALSE	FALSE	out-of-context	{}
Mathematics	math_double	20 is to 40 as 30 is to	60	x	0.53	0	0	{'x': 0.53, 'y': 0.21, '': 0.1, 'what': 0.08, 'X': 0.04}	309	5.81145e-07	0.531249	0.996921	original		0.02	FALSE	FALSE	FALSE	out-of-context	{}
Mathematics	math_double	18 is to 36 as 74 is to	148	x	0.53	0	0	{'x': 0.53, 'what': 0.18, '': 0.11, 'y': 0.09, 'X': 0.04}	8050	9.0804e-09	0.53125	0.919782	original		0.02	FALSE	FALSE	FALSE	out-of-context	{}
Mathematics	math_double	86 is to 172 as 16 is to	32	x	0.53	0	0	{'x': 0.53, '': 0.16, 'what': 0.14, 'y': 0.09, 'X': 0.03}	1482	1.88127e-07	0.527344	0.985232	original		0.02	FALSE	FALSE	FALSE	out-of-context	{}
Mathematics	math_double	85 is to 170 as 16 is to	32	x	0.53	0	0	{'x': 0.53, '': 0.2, 'what': 0.11, 'y': 0.08, 'X': 0.04}	3993	3.14321e-08	0.527344	0.96021	original		0.02	FALSE	FALSE	FALSE	out-of-context	{}
Mathematics	math_double	84 is to 168 as 16 is to	32	x	0.53	0	0	{'x': 0.53, '': 0.18, 'what': 0.12, 'y': 0.06, 'X': 0.05}	2186	9.91859e-08	0.527344	0.978217	original		0.02	FALSE	FALSE	FALSE	out-of-context	{}
Mathematics	math_double	64 is to 128 as 72 is to	144	x	0.53	0	0	{'x': 0.53, 'y': 0.16, 'what': 0.14, '\\(': 0.04, '': 0.04}	3916	4.77303e-08	0.527344	0.960977	original		0.02	FALSE	FALSE	FALSE	out-of-context	{}
Mathematics	math_double	58 is to 116 as 28 is to	56	x	0.53	0	0	{'x': 0.53, 'what': 0.22, 'y': 0.1, '': 0.08, 'X': 0.03}	1913	6.10016e-08	0.53125	0.980937	original		0.02	FALSE	FALSE	FALSE	out-of-context	{}
Mathematics	math_division2	94 is to 47 as 76 is to	38	x	0.53	0	0	{'x': 0.53, 'y': 0.19, 'what': 0.12, '': 0.06, 'X': 0.03}	5461	1.31549e-08	0.527344	0.945582	original		0.02	FALSE	FALSE	FALSE	out-of-context	{}
Mathematics	math_double	26 is to 52 as 30 is to	60	x	0.52	0	0	{'x': 0.52, 'y': 0.17, 'what': 0.13, 'X': 0.05, '': 0.04}	1367	1.6205e-07	0.523437	0.986378	original		0.02	FALSE	FALSE	FALSE	out-of-context	{}
Mathematics	math_double	26 is to 52 as 74 is to	148	x	0.52	0	0	{'x': 0.52, 'what': 0.17, 'y': 0.11, 'X': 0.06, '': 0.06}	6919	1.76951e-08	0.515625	0.931053	original		0.02	FALSE	FALSE	FALSE	out-of-context	{}
Mathematics	math_double	18 is to 36 as 85 is to	170	x	0.52	0	0	{'x': 0.52, 'what': 0.16, 'y': 0.12, '': 0.1, 'X': 0.04}	3535	3.49246e-08	0.515625	0.964774	original		0.02	FALSE	FALSE	FALSE	out-of-context	{}
Mathematics	math_double	22 is to 44 as 85 is to	170	x	0.52	0	0	{'x': 0.52, 'what': 0.12, 'y': 0.12, '': 0.1, 'X': 0.05}	3863	4.42378e-08	0.523437	0.961506	original		0.02	FALSE	FALSE	FALSE	out-of-context	{}
Mathematics	math_double	88 is to 176 as 28 is to	56	x	0.52	0	0	{'x': 0.52, 'what': 0.22, '': 0.11, 'y': 0.09, 'X': 0.02}	1186	1.68569e-07	0.519531	0.988182	original		0.02	FALSE	FALSE	FALSE	out-of-context	{}
Mathematics	math_double	78 is to 156 as 28 is to	56	x	0.52	0	0	{'x': 0.52, 'what': 0.19, '': 0.11, 'y': 0.1, 'X': 0.03}	1774	7.63685e-08	0.519531	0.982322	original		0.02	FALSE	FALSE	FALSE	out-of-context	{}
Mathematics	math_double	78 is to 156 as 85 is to	170	x	0.52	0	0	{'x': 0.52, 'what': 0.18, 'y': 0.14, '': 0.09, 'X': 0.02}	1426	8.84756e-08	0.523437	0.98579	original		0.02	FALSE	FALSE	FALSE	out-of-context	{}
Mathematics	math_double	84 is to 168 as 28 is to	56	x	0.52	0	0	{'x': 0.52, 'what': 0.17, '': 0.12, 'y': 0.09, 'X': 0.05}	1607	9.26666e-08	0.523437	0.983986	original		0.02	FALSE	FALSE	FALSE	out-of-context	{}
Mathematics	math_double	64 is to 128 as 16 is to	32	x	0.52	0	0	{'x': 0.52, 'what': 0.12, '': 0.11, 'y': 0.08, 'X': 0.05}	2630	9.54606e-08	0.523437	0.973792	original		0.02	FALSE	FALSE	FALSE	out-of-context	{}
Mathematics	math_double	56 is to 112 as 74 is to	148	x	0.52	0	0	{'x': 0.52, 'what': 0.19, 'y': 0.11, '': 0.1, '\\(': 0.02}	6058	1.10012e-08	0.519531	0.939632	original		0.02	FALSE	FALSE	FALSE	out-of-context	{}
Mathematics	math_double	74 is to 148 as 28 is to	56	x	0.52	0	0	{'x': 0.52, 'what': 0.21, 'y': 0.11, '': 0.07, 'X': 0.03}	1844	5.42495e-08	0.519531	0.981625	original		0.02	FALSE	FALSE	FALSE	out-of-context	{}
Mathematics	math_double	76 is to 152 as 30 is to	60	x	0.52	0	0	{'x': 0.52, 'what': 0.2, 'y': 0.12, '': 0.08, 'X': 0.03}	1617	8.9407e-08	0.519531	0.983887	original		0.02	FALSE	FALSE	FALSE	out-of-context	{}
Mathematics	math_division2	46 is to 23 as 76 is to	38	x	0.52	0	0	{'x': 0.52, 'y': 0.19, 'what': 0.12, '': 0.06, 'X': 0.03}	4536	1.46101e-08	0.523437	0.954799	original		0.02	FALSE	FALSE	FALSE	out-of-context	{}
Mathematics	math_division2	2 is to 1 as 76 is to	38	x	0.52	0	0	{'x': 0.52, '': 0.22, 'X': 0.07, 'y': 0.05, 'what': 0.05}	5201	9.40636e-08	0.523437	0.948172	original		0.02	FALSE	FALSE	FALSE	out-of-context	{}
Mathematics	math_squares	4 is to 16 as 26 is to	676	x	0.52	0	0	{'x': 0.52, 'y': 0.15, 'what': 0.15, '': 0.06, 'X': 0.06}	27154	1.31695e-09	0.515625	0.729412	original		0.02	FALSE	FALSE	FALSE	out-of-context	{}
Mathematics	math_squares	16 is to 256 as 12 is to	144	x	0.52	0	0	{'x': 0.52, 'what': 0.22, 'y': 0.09, '': 0.06, 'X': 0.04}	4453	2.38651e-08	0.523437	0.955626	original		0.02	FALSE	FALSE	FALSE	out-of-context	{}
Mathematics	math_division5	5 is to 1 as 65 is to	13	x	0.52	0	0	{'x': 0.52, '': 0.19, 'X': 0.06, 'y': 0.06, 'what': 0.05}	3537	1.64844e-07	0.523437	0.964754	original		0.02	FALSE	FALSE	FALSE	out-of-context	{}
Mathematics	math_division2	74 is to 37 as 76 is to	38	x	0.52	0	0	{'x': 0.52, 'y': 0.23, 'what': 0.09, 'X': 0.04, '': 0.04}	6590	1.25146e-08	0.523437	0.934331	original		0.02	FALSE	FALSE	FALSE	out-of-context	{}
Mathematics	math_division2	64 is to 32 as 94 is to	47	x	0.52	0	0	{'x': 0.52, 'what': 0.13, 'y': 0.1, '': 0.08, 'X': 0.06}	2326	1.10362e-07	0.523437	0.976822	original		0.02	FALSE	FALSE	FALSE	out-of-context	{}
Mathematics	math_division2	84 is to 42 as 76 is to	38	x	0.52	0	0	{'x': 0.52, 'y': 0.21, 'what': 0.13, '': 0.05, '\\(': 0.03}	7644	9.37143e-09	0.515625	0.923828	original		0.02	FALSE	FALSE	FALSE	out-of-context	{}
Mathematics	math_double	25 is to 50 as 85 is to	170	x	0.51	0	0	{'x': 0.51, 'what': 0.14, 'y': 0.13, '': 0.11, 'X': 0.05}	1663	5.68107e-08	0.511719	0.983428	original		0.02	FALSE	FALSE	FALSE	out-of-context	{}
Mathematics	math_double	18 is to 36 as 15 is to	30	x	0.51	0	0	{'x': 0.51, 'what': 0.24, 'y': 0.1, '': 0.09, 'X': 0.03}	1573	5.9139e-08	0.507812	0.984325	original		0.02	FALSE	FALSE	FALSE	out-of-context	{}
Mathematics	math_double	86 is to 172 as 74 is to	148	x	0.51	0	0	{'x': 0.51, 'what': 0.18, 'y': 0.12, '': 0.11, '\\(': 0.02}	7631	1.53668e-08	0.511719	0.923958	original		0.02	FALSE	FALSE	FALSE	out-of-context	{}
Mathematics	math_double	96 is to 192 as 28 is to	56	x	0.51	0	0	{'x': 0.51, 'what': 0.18, '': 0.12, 'y': 0.1, 'X': 0.03}	1680	8.84756e-08	0.507812	0.983259	original		0.02	FALSE	FALSE	FALSE	out-of-context	{}
Mathematics	math_double	94 is to 188 as 20 is to	40	x	0.51	0	0	{'x': 0.51, 'what': 0.2, '': 0.11, 'y': 0.09, 'X': 0.04}	1183	1.85333e-07	0.507812	0.988211	original		0.02	FALSE	FALSE	FALSE	out-of-context	{}
Mathematics	math_double	74 is to 148 as 50 is to	100	x	0.51	0	0	{'x': 0.51, 'what': 0.2, 'y': 0.11, '': 0.09, 'X': 0.03}	556	3.65078e-07	0.511718	0.99446	original		0.02	FALSE	FALSE	FALSE	out-of-context	{}
Mathematics	math_double	74 is to 148 as 30 is to	60	x	0.51	0	0	{'x': 0.51, 'what': 0.2, 'y': 0.12, '': 0.08, 'X': 0.04}	1872	6.28643e-08	0.507812	0.981346	original		0.02	FALSE	FALSE	FALSE	out-of-context	{}
Mathematics	math_double	76 is to 152 as 16 is to	32	x	0.51	0	0	{'x': 0.51, 'what': 0.17, '': 0.14, 'y': 0.09, 'X': 0.04}	3133	5.26197e-08	0.511719	0.96878	original		0.02	FALSE	FALSE	FALSE	out-of-context	{}
Mathematics	math_squares	8 is to 64 as 26 is to	676	x	0.51	0	0	{'x': 0.51, 'what': 0.17, 'y': 0.16, 'X': 0.05, '': 0.04}	29466	9.38599e-10	0.507812	0.706374	original		0.02	FALSE	FALSE	FALSE	out-of-context	{}
Mathematics	math_division2	98 is to 49 as 80 is to	40	x	0.51	0	0	{'x': 0.51, 'y': 0.18, 'what': 0.13, '': 0.05, '\\(': 0.04}	2110	1.04308e-07	0.511719	0.978974	original		0.02	FALSE	FALSE	FALSE	out-of-context	{}
Mathematics	math_double	5 is to 10 as 16 is to	32	x	0.51	0	0	{'x': 0.51, 'y': 0.18, 'what': 0.12, '': 0.07, 'X': 0.05}	3511	2.87546e-08	0.507812	0.965013	original		0.02	FALSE	FALSE	FALSE	out-of-context	{}
Mathematics	math_division2	74 is to 37 as 70 is to	35	x	0.51	0	0	{'x': 0.51, 'y': 0.21, 'what': 0.1, '\\(': 0.05, '': 0.04}	4331	2.78233e-08	0.511719	0.956842	original		0.02	FALSE	FALSE	FALSE	out-of-context	{}
Mathematics	math_division2	66 is to 33 as 40 is to	20	x	0.51	0	0	{'x': 0.51, 'what': 0.16, 'y': 0.16, '': 0.06, 'X': 0.03}	2466	6.79865e-08	0.507812	0.975426	original		0.02	FALSE	FALSE	FALSE	out-of-context	{}
Mathematics	math_division2	62 is to 31 as 96 is to	48	x	0.51	0	0	{'x': 0.51, 'y': 0.26, 'what': 0.1, '': 0.04, 'Y': 0.02}	1745	5.65778e-08	0.511719	0.982611	original		0.02	FALSE	FALSE	FALSE	out-of-context	{}
Mathematics	math_division2	84 is to 42 as 62 is to	31	x	0.51	0	0	{'x': 0.51, 'y': 0.21, 'what': 0.13, '': 0.06, '\\(': 0.03}	7299	9.31323e-09	0.507812	0.927266	original		0.02	FALSE	FALSE	FALSE	out-of-context	{}
Mathematics	math_division2	84 is to 42 as 34 is to	17	x	0.51	0	0	{'x': 0.51, 'y': 0.18, 'what': 0.15, '': 0.06, '\\(': 0.03}	2491	6.00703e-08	0.507812	0.975177	original		0.02	FALSE	FALSE	FALSE	out-of-context	{}
Mathematics	math_double	14 is to 28 as 20 is to	40	x	0.5	0	0	{'x': 0.5, 'what': 0.18, 'y': 0.16, 'X': 0.06, '': 0.04}	553	3.11062e-07	0.496093	0.994489	original		0.02	FALSE	FALSE	FALSE	out-of-context	{}
Mathematics	math_double	15 is to 30 as 85 is to	170	x	0.5	0	0	{'x': 0.5, 'what': 0.17, 'y': 0.16, '': 0.09, 'X': 0.04}	1994	3.51574e-08	0.503906	0.98013	original		0.02	FALSE	FALSE	FALSE	out-of-context	{}
Mathematics	math_double	8 is to 16 as 24 is to	48	x	0.5	0	0	{'x': 0.5, 'y': 0.2, 'what': 0.15, 'X': 0.05, '': 0.03}	2136	5.65778e-08	0.498047	0.978715	original		0.02	FALSE	FALSE	FALSE	out-of-context	{}
Mathematics	math_double	28 is to 56 as 85 is to	170	x	0.5	0	0	{'x': 0.5, 'what': 0.19, 'y': 0.15, '': 0.06, 'X': 0.04}	2339	5.42495e-08	0.5	0.976692	original		0.02	FALSE	FALSE	FALSE	out-of-context	{}
Mathematics	math_double	28 is to 56 as 20 is to	40	x	0.5	0	0	{'x': 0.5, 'what': 0.25, 'y': 0.12, '': 0.05, 'X': 0.04}	537	3.61353e-07	0.496093	0.994649	original		0.02	FALSE	FALSE	FALSE	out-of-context	{}
Mathematics	math_double	20 is to 40 as 16 is to	32	x	0.5	0	0	{'x': 0.5, '': 0.17, 'y': 0.15, 'what': 0.1, 'X': 0.03}	2785	2.78233e-08	0.5	0.972248	original		0.02	FALSE	FALSE	FALSE	out-of-context	{}
Mathematics	math_double	18 is to 36 as 26 is to	52	x	0.5	0	0	{'x': 0.5, 'y': 0.19, 'what': 0.18, '': 0.05, 'X': 0.03}	3021	2.20025e-08	0.5	0.969896	original		0.02	FALSE	FALSE	FALSE	out-of-context	{}
Mathematics	math_double	88 is to 176 as 16 is to	32	x	0.5	0	0	{'x': 0.5, '': 0.18, 'what': 0.16, 'y': 0.07, 'X': 0.03}	1793	1.35973e-07	0.503906	0.982133	original		0.02	FALSE	FALSE	FALSE	out-of-context	{}
Mathematics	math_double	82 is to 164 as 20 is to	40	x	0.5	0	0	{'x': 0.5, 'what': 0.22, '': 0.13, 'X': 0.05, 'y': 0.05}	854	3.22238e-07	0.503906	0.99149	original		0.02	FALSE	FALSE	FALSE	out-of-context	{}
Mathematics	math_double	74 is to 148 as 16 is to	32	x	0.5	0	0	{'x': 0.5, 'what': 0.18, '': 0.16, 'y': 0.08, 'X': 0.04}	3050	4.2608e-08	0.496094	0.969607	original		0.02	FALSE	FALSE	FALSE	out-of-context	{}
Mathematics	math_division2	56 is to 28 as 64 is to	32	x	0.5	0	0	{'x': 0.5, 'y': 0.21, 'what': 0.13, '': 0.06, '\\(': 0.02}	2955	3.81842e-08	0.503906	0.970554	original		0.02	FALSE	FALSE	FALSE	out-of-context	{}
Mathematics	math_squares	28 is to 784 as 26 is to	676	x	0.5	0	0	{'x': 0.5, 'what': 0.17, 'y': 0.12, '': 0.07, 'X': 0.05}	5945	2.98023e-08	0.496094	0.940759	original		0.02	FALSE	FALSE	FALSE	out-of-context	{}
Mathematics	math_squares	22 is to 484 as 25 is to	625	x	0.5	0	0	{'x': 0.5, 'what': 0.2, 'y': 0.1, '': 0.08, 'X': 0.05}	3964	5.23869e-08	0.503906	0.960499	original		0.02	FALSE	FALSE	FALSE	out-of-context	{}
Mathematics	math_division2	2 is to 1 as 46 is to	23	x	0.5	0	0	{'x': 0.5, '': 0.23, 'X': 0.08, 'y': 0.06, 'what': 0.04}	2169	2.68221e-07	0.5	0.978386	original		0.02	FALSE	FALSE	FALSE	out-of-context	{}
Mathematics	math_division2	60 is to 30 as 58 is to	29	x	0.5	0	0	{'x': 0.5, 'y': 0.19, 'what': 0.14, '': 0.09, 'X': 0.03}	2729	2.92202e-08	0.5	0.972806	original		0.02	FALSE	FALSE	FALSE	out-of-context	{}
Mathematics	math_division2	60 is to 30 as 38 is to	19	x	0.5	0	0	{'x': 0.5, 'y': 0.19, 'what': 0.13, '': 0.1, 'X': 0.03}	5044	1.0943e-08	0.503906	0.949737	original		0.02	FALSE	FALSE	FALSE	out-of-context	{}
Mathematics	math_division2	64 is to 32 as 80 is to	40	x	0.5	0	0	{'x': 0.5, 'what': 0.16, 'y': 0.14, 'X': 0.06, '': 0.04}	1409	2.17929e-07	0.503906	0.985959	original		0.02	FALSE	FALSE	FALSE	out-of-context	{}
Mathematics	math_division2	64 is to 32 as 76 is to	38	x	0.5	0	0	{'x': 0.5, 'what': 0.16, 'y': 0.1, '': 0.08, 'X': 0.06}	3256	6.70552e-08	0.503906	0.967554	original		0.02	FALSE	FALSE	FALSE	out-of-context	{}
Mathematics	math_division2	78 is to 39 as 34 is to	17	x	0.5	0	0	{'x': 0.5, 'what': 0.17, 'y': 0.13, '': 0.12, 'X': 0.03}	1976	8.61473e-08	0.498047	0.980309	original		0.02	FALSE	FALSE	FALSE	out-of-context	{}
Mathematics	math_division2	78 is to 39 as 46 is to	23	x	0.5	0	0	{'x': 0.5, 'y': 0.14, '': 0.13, 'what': 0.13, 'X': 0.03}	2307	5.84405e-08	0.503906	0.977011	original		0.02	FALSE	FALSE	FALSE	out-of-context	{}
Mathematics	math_double	48 is to 96 as 74 is to	148	x	0.49	0	0	{'x': 0.49, 'what': 0.23, '': 0.1, 'y': 0.09, 'X': 0.03}	8747	7.68341e-09	0.486328	0.912837	original		0.02	FALSE	FALSE	FALSE	out-of-context	{}
Mathematics	math_double	14 is to 28 as 30 is to	60	x	0.49	0	0	{'x': 0.49, 'y': 0.21, 'what': 0.12, 'X': 0.06, '': 0.04}	1788	6.98492e-08	0.486328	0.982183	original		0.02	FALSE	FALSE	FALSE	out-of-context	{}
Mathematics	math_double	88 is to 176 as 30 is to	60	x	0.49	0	0	{'x': 0.49, 'what': 0.22, '': 0.12, 'y': 0.11, 'X': 0.03}	950	2.30037e-07	0.486328	0.990533	original		0.02	FALSE	FALSE	FALSE	out-of-context	{}
Mathematics	math_double	78 is to 156 as 16 is to	32	x	0.49	0	0	{'x': 0.49, '': 0.19, 'what': 0.16, 'y': 0.08, 'X': 0.04}	3219	4.28408e-08	0.490234	0.967923	original		0.02	FALSE	FALSE	FALSE	out-of-context	{}
Mathematics	math_double	96 is to 192 as 74 is to	148	x	0.49	0	0	{'x': 0.49, 'what': 0.21, '': 0.12, 'y': 0.08, '\\(': 0.03}	5901	1.32131e-08	0.486328	0.941197	original		0.02	FALSE	FALSE	FALSE	out-of-context	{}
Mathematics	math_double	64 is to 128 as 74 is to	148	x	0.49	0	0	{'x': 0.49, 'what': 0.15, '': 0.1, 'y': 0.1, 'X': 0.04}	6846	2.38651e-08	0.486328	0.93178	original		0.02	FALSE	FALSE	FALSE	out-of-context	{}
Mathematics	math_double	58 is to 116 as 16 is to	32	x	0.49	0	0	{'x': 0.49, '': 0.18, 'what': 0.17, 'y': 0.08, 'X': 0.03}	2556	6.70552e-08	0.488281	0.97453	original		0.02	FALSE	FALSE	FALSE	out-of-context	{}
Mathematics	math_division2	38 is to 19 as 28 is to	14	x	0.49	0	0	{'x': 0.49, 'y': 0.21, 'what': 0.11, '': 0.06, 'X': 0.04}	973	2.98023e-07	0.490234	0.990304	original		0.02	FALSE	FALSE	FALSE	out-of-context	{}
Mathematics	math_division2	54 is to 27 as 64 is to	32	x	0.49	0	0	{'x': 0.49, 'y': 0.24, 'what': 0.1, '': 0.06, '\\(': 0.03}	3498	3.72529e-08	0.488281	0.965143	original		0.02	FALSE	FALSE	FALSE	out-of-context	{}
Mathematics	math_division2	54 is to 27 as 50 is to	25	x	0.49	0	0	{'x': 0.49, 'y': 0.18, 'what': 0.11, '': 0.08, '\\(': 0.04}	1722	1.28523e-07	0.492187	0.98284	original		0.02	FALSE	FALSE	FALSE	out-of-context	{}
Mathematics	math_division2	46 is to 23 as 62 is to	31	x	0.49	0	0	{'x': 0.49, 'y': 0.23, 'what': 0.09, '': 0.07, 'X': 0.03}	4457	1.74623e-08	0.492187	0.955586	original		0.02	FALSE	FALSE	FALSE	out-of-context	{}
Mathematics	math_squares	25 is to 625 as 26 is to	676	x	0.49	0	0	{'x': 0.49, 'what': 0.25, '': 0.08, 'y': 0.07, 'X': 0.04}	7048	1.21072e-08	0.488281	0.929767	original		0.02	FALSE	FALSE	FALSE	out-of-context	{}
Mathematics	math_division2	60 is to 30 as 62 is to	31	x	0.49	0	0	{'x': 0.49, 'y': 0.25, 'what': 0.1, '': 0.06, 'X': 0.04}	3620	2.06055e-08	0.486328	0.963927	original		0.02	FALSE	FALSE	FALSE	out-of-context	{}
Mathematics	math_division2	60 is to 30 as 28 is to	14	x	0.49	0	0	{'x': 0.49, 'y': 0.18, 'what': 0.14, '': 0.11, 'X': 0.03}	1224	1.00117e-07	0.486328	0.987803	original		0.02	FALSE	FALSE	FALSE	out-of-context	{}
Mathematics	math_division2	62 is to 31 as 80 is to	40	x	0.49	0	0	{'x': 0.49, 'y': 0.26, 'what': 0.12, '': 0.03, '\\(': 0.03}	1727	6.33299e-08	0.494141	0.982791	original		0.02	FALSE	FALSE	FALSE	out-of-context	{}
Mathematics	math_division2	78 is to 39 as 64 is to	32	x	0.49	0	0	{'x': 0.49, 'y': 0.19, 'what': 0.14, '': 0.08, 'X': 0.03}	4091	2.95695e-08	0.490234	0.959233	original		0.02	FALSE	FALSE	FALSE	out-of-context	{}
Mathematics	math_division2	82 is to 41 as 34 is to	17	x	0.49	0	0	{'x': 0.49, 'y': 0.17, 'what': 0.16, '': 0.09, '\\(': 0.03}	1621	1.01514e-07	0.490234	0.983847	original		0.02	FALSE	FALSE	FALSE	out-of-context	{}
Mathematics	math_division2	82 is to 41 as 80 is to	40	x	0.49	0	0	{'x': 0.49, 'y': 0.21, 'what': 0.13, '\\(': 0.05, '': 0.04}	2191	9.45292e-08	0.490234	0.978167	original		0.02	FALSE	FALSE	FALSE	out-of-context	{}
Factual Knowledge	capital_world	Dushanbe is to Tajikistan as Libreville is to	gabon	what	0.48	0	0	{'what': 0.48, '?': 0.02, '': 0.11, 'which': 0.05}	12	0.0071106	0.477264	0.99988	original		0.02	FALSE	FALSE	FALSE	out-of-context	{}
Mathematics	math_double	42 is to 84 as 16 is to	32	x	0.48	0	0	{'x': 0.48, 'what': 0.17, '': 0.13, 'y': 0.09, 'X': 0.04}	2091	1.06636e-07	0.476562	0.979163	original		0.02	FALSE	FALSE	FALSE	out-of-context	{}
Mathematics	math_double	48 is to 96 as 28 is to	56	x	0.48	0	0	{'x': 0.48, 'what': 0.22, '': 0.11, 'y': 0.09, 'X': 0.04}	1579	1.01514e-07	0.476562	0.984265	original		0.02	FALSE	FALSE	FALSE	out-of-context	{}
Mathematics	math_double	48 is to 96 as 16 is to	32	x	0.48	0	0	{'x': 0.48, 'what': 0.19, '': 0.14, 'y': 0.07, 'X': 0.04}	2047	9.82545e-08	0.482422	0.979602	original		0.02	FALSE	FALSE	FALSE	out-of-context	{}
Mathematics	math_double	28 is to 56 as 74 is to	148	x	0.48	0	0	{'x': 0.48, 'what': 0.25, 'y': 0.12, '': 0.05, 'X': 0.04}	6420	1.27475e-08	0.480469	0.936025	original		0.02	FALSE	FALSE	FALSE	out-of-context	{}
Mathematics	math_double	54 is to 108 as 85 is to	170	x	0.48	0	0	{'x': 0.48, 'what': 0.2, 'y': 0.13, '': 0.11, '\\(': 0.02}	2101	5.54137e-08	0.476562	0.979064	original		0.02	FALSE	FALSE	FALSE	out-of-context	{}
Mathematics	math_double	68 is to 136 as 16 is to	32	x	0.48	0	0	{'x': 0.48, '': 0.24, 'what': 0.13, 'y': 0.05, 'X': 0.04}	1841	1.13621e-07	0.476562	0.981655	original		0.02	FALSE	FALSE	FALSE	out-of-context	{}
Mathematics	math_double	68 is to 136 as 28 is to	56	x	0.48	0	0	{'x': 0.48, 'what': 0.22, '': 0.13, 'y': 0.08, 'X': 0.04}	1218	1.67638e-07	0.478515	0.987863	original		0.02	FALSE	FALSE	FALSE	out-of-context	{}
Mathematics	math_division2	38 is to 19 as 46 is to	23	x	0.48	0	0	{'x': 0.48, 'y': 0.22, 'what': 0.1, '': 0.06, 'X': 0.05}	1437	1.15018e-07	0.480469	0.98568	original		0.02	FALSE	FALSE	FALSE	out-of-context	{}
Mathematics	math_division2	38 is to 19 as 62 is to	31	x	0.48	0	0	{'x': 0.48, 'y': 0.2, 'what': 0.12, '': 0.07, 'X': 0.05}	4793	2.23517e-08	0.484375	0.952238	original		0.02	FALSE	FALSE	FALSE	out-of-context	{}
Mathematics	math_division2	52 is to 26 as 46 is to	23	x	0.48	0	0	{'x': 0.48, 'y': 0.17, 'what': 0.16, '': 0.08, 'X': 0.04}	1801	1.01514e-07	0.482422	0.982053	original		0.02	FALSE	FALSE	FALSE	out-of-context	{}
Mathematics	math_division2	56 is to 28 as 46 is to	23	x	0.48	0	0	{'x': 0.48, 'what': 0.16, 'y': 0.15, '': 0.13, 'X': 0.02}	2085	5.68107e-08	0.478516	0.979223	original		0.02	FALSE	FALSE	FALSE	out-of-context	{}
Mathematics	math_division2	46 is to 23 as 28 is to	14	x	0.48	0	0	{'x': 0.48, 'y': 0.22, 'what': 0.1, '': 0.06, '\\(': 0.04}	957	2.03028e-07	0.484375	0.990464	original		0.02	FALSE	FALSE	FALSE	out-of-context	{}
Mathematics	math_squares	4 is to 16 as 5 is to	25	x	0.48	0	0	{'x': 0.48, '': 0.17, 'what': 0.15, 'y': 0.1, 'X': 0.04}	653	5.43892e-07	0.484374	0.993493	original		0.02	FALSE	FALSE	FALSE	out-of-context	{}
Mathematics	math_division2	94 is to 47 as 34 is to	17	x	0.48	0	0	{'x': 0.48, 'y': 0.17, 'what': 0.14, '': 0.1, 'X': 0.03}	1868	1.04774e-07	0.476562	0.981386	original		0.02	FALSE	FALSE	FALSE	out-of-context	{}
Mathematics	math_division2	64 is to 32 as 26 is to	13	x	0.48	0	0	{'x': 0.48, 'what': 0.15, 'y': 0.11, '': 0.11, 'X': 0.05}	2000	2.32831e-07	0.476562	0.98007	original		0.02	FALSE	FALSE	FALSE	out-of-context	{}
Mathematics	math_division2	84 is to 42 as 94 is to	47	x	0.48	0	0	{'x': 0.48, 'y': 0.23, 'what': 0.12, '': 0.06, '\\(': 0.03}	1976	7.63685e-08	0.480469	0.980309	original		0.02	FALSE	FALSE	FALSE	out-of-context	{}
Mathematics	math_division2	76 is to 38 as 46 is to	23	x	0.48	0	0	{'x': 0.48, 'y': 0.21, 'what': 0.14, '': 0.1, 'X': 0.02}	1972	5.58794e-08	0.476562	0.980349	original		0.02	FALSE	FALSE	FALSE	out-of-context	{}
Mathematics	math_double	48 is to 96 as 24 is to	48	x	0.47	0	0	{'x': 0.47, 'what': 0.26, '': 0.09, 'y': 0.06, 'X': 0.04}	884	2.47732e-07	0.474609	0.991191	original		0.02	FALSE	FALSE	FALSE	out-of-context	{}
Mathematics	math_double	48 is to 96 as 56 is to	112	x	0.47	0	0	{'x': 0.47, 'what': 0.22, 'y': 0.13, '': 0.07, 'X': 0.03}	9514	6.75209e-09	0.472656	0.905194	original		0.02	FALSE	FALSE	FALSE	out-of-context	{}
Mathematics	math_double	45 is to 90 as 16 is to	32	x	0.47	0	0	{'x': 0.47, '': 0.21, 'what': 0.12, 'y': 0.1, '\\(': 0.03}	2129	5.96046e-08	0.474609	0.978785	original		0.02	FALSE	FALSE	FALSE	out-of-context	{}
Mathematics	math_double	8 is to 16 as 85 is to	170	x	0.47	0	0	{'x': 0.47, 'what': 0.16, '': 0.12, 'y': 0.11, 'X': 0.06}	4938	3.44589e-08	0.474609	0.950793	original		0.02	FALSE	FALSE	FALSE	out-of-context	{}
Mathematics	math_double	25 is to 50 as 16 is to	32	x	0.47	0	0	{'x': 0.47, '': 0.18, 'what': 0.15, 'y': 0.08, 'X': 0.05}	1480	6.70552e-08	0.474609	0.985252	original		0.02	FALSE	FALSE	FALSE	out-of-context	{}
Mathematics	math_double	28 is to 56 as 16 is to	32	x	0.47	0	0	{'x': 0.47, 'what': 0.25, 'y': 0.1, '': 0.08, 'X': 0.05}	1251	1.23866e-07	0.466797	0.987534	original		0.02	FALSE	FALSE	FALSE	out-of-context	{}
Mathematics	math_double	22 is to 44 as 20 is to	40	x	0.47	0	0	{'x': 0.47, 'what': 0.17, 'y': 0.13, '': 0.08, 'X': 0.05}	1013	3.55765e-07	0.470703	0.989906	original		0.02	FALSE	FALSE	FALSE	out-of-context	{}
Mathematics	math_double	92 is to 184 as 20 is to	40	x	0.47	0	0	{'x': 0.47, 'what': 0.28, '': 0.1, 'y': 0.08, 'X': 0.03}	1065	1.79745e-07	0.46875	0.989387	original		0.02	FALSE	FALSE	FALSE	out-of-context	{}
Mathematics	math_double	92 is to 184 as 16 is to	32	x	0.47	0	0	{'x': 0.47, 'what': 0.22, '': 0.15, 'y': 0.07, 'X': 0.03}	2343	7.54371e-08	0.474609	0.976652	original		0.02	FALSE	FALSE	FALSE	out-of-context	{}
Mathematics	math_double	94 is to 188 as 30 is to	60	x	0.47	0	0	{'x': 0.47, 'what': 0.2, 'y': 0.13, '': 0.1, 'X': 0.03}	1681	9.82545e-08	0.470703	0.983249	original		0.02	FALSE	FALSE	FALSE	out-of-context	{}
Mathematics	math_double	94 is to 188 as 16 is to	32	x	0.47	0	0	{'x': 0.47, '': 0.18, 'what': 0.16, 'y': 0.09, 'X': 0.03}	2806	6.93835e-08	0.474609	0.972038	original		0.02	FALSE	FALSE	FALSE	out-of-context	{}
Mathematics	math_double	62 is to 124 as 28 is to	56	x	0.47	0	0	{'x': 0.47, 'what': 0.22, 'y': 0.14, '': 0.08, 'X': 0.03}	1489	1.11759e-07	0.472656	0.985162	original		0.02	FALSE	FALSE	FALSE	out-of-context	{}
Mathematics	math_double	62 is to 124 as 85 is to	170	x	0.47	0	0	{'x': 0.47, 'what': 0.19, 'y': 0.18, '': 0.08, '\\(': 0.02}	1645	7.35745e-08	0.472656	0.983608	original		0.02	FALSE	FALSE	FALSE	out-of-context	{}
Mathematics	math_double	58 is to 116 as 85 is to	170	x	0.47	0	0	{'x': 0.47, 'what': 0.21, 'y': 0.16, '': 0.11, '\\(': 0.01}	1748	7.31088e-08	0.46875	0.982581	original		0.02	FALSE	FALSE	FALSE	out-of-context	{}
Mathematics	math_division2	42 is to 21 as 62 is to	31	x	0.47	0	0	{'x': 0.47, 'y': 0.2, 'what': 0.12, '': 0.1, '\\(': 0.04}	5973	1.36206e-08	0.472656	0.94048	original		0.02	FALSE	FALSE	FALSE	out-of-context	{}
Mathematics	math_division2	96 is to 48 as 46 is to	23	x	0.47	0	0	{'x': 0.47, '': 0.18, 'y': 0.12, 'what': 0.12, 'X': 0.03}	4097	4.19095e-08	0.46875	0.959174	original		0.02	FALSE	FALSE	FALSE	out-of-context	{}
Mathematics	math_division2	60 is to 30 as 32 is to	16	x	0.47	0	0	{'x': 0.47, 'y': 0.21, 'what': 0.14, '': 0.09, 'X': 0.03}	583	3.20375e-07	0.472656	0.99419	original		0.02	FALSE	FALSE	FALSE	out-of-context	{}
Mathematics	math_division2	76 is to 38 as 34 is to	17	x	0.47	0	0	{'x': 0.47, 'y': 0.19, 'what': 0.17, '': 0.09, '\\(': 0.02}	1730	7.45058e-08	0.474609	0.982761	original		0.02	FALSE	FALSE	FALSE	out-of-context	{}
Mathematics	math_division2	82 is to 41 as 46 is to	23	x	0.47	0	0	{'x': 0.47, 'y': 0.19, 'what': 0.12, '': 0.12, '\\(': 0.03}	1856	7.63685e-08	0.472656	0.981505	original		0.02	FALSE	FALSE	FALSE	out-of-context	{}
Factual Knowledge	capital_world	Zambia is to Lusaka as Bahrain is to	manama	?	0.46	0	0	{'?': 0.09, '': 0.03, 'what': 0.05}	282	2.76566e-05	0.458957	0.99719	original		0.02	FALSE	FALSE	FALSE	out-of-context	{}
Mathematics	math_double	46 is to 92 as 20 is to	40	x	0.46	0	0	{'x': 0.46, 'what': 0.28, 'y': 0.11, '': 0.07, '\\(': 0.03}	1076	1.41561e-07	0.458984	0.989278	original		0.02	FALSE	FALSE	FALSE	out-of-context	{}
Mathematics	math_double	15 is to 30 as 20 is to	40	x	0.46	0	0	{'x': 0.46, 'y': 0.2, 'what': 0.16, '': 0.1, 'X': 0.04}	227	1.05798e-06	0.46289	0.997738	original		0.02	FALSE	FALSE	FALSE	out-of-context	{}
Mathematics	math_double	15 is to 30 as 26 is to	52	x	0.46	0	0	{'x': 0.46, 'y': 0.22, 'what': 0.15, '': 0.08, 'X': 0.04}	3197	1.46101e-08	0.460937	0.968142	original		0.02	FALSE	FALSE	FALSE	out-of-context	{}
Mathematics	math_double	10 is to 20 as 85 is to	170	x	0.46	0	0	{'x': 0.46, 'what': 0.18, '': 0.12, 'y': 0.12, 'X': 0.05}	2547	3.72529e-08	0.462891	0.974619	original		0.02	FALSE	FALSE	FALSE	out-of-context	{}
Mathematics	math_double	18 is to 36 as 24 is to	48	x	0.46	0	0	{'x': 0.46, 'what': 0.22, 'y': 0.21, 'X': 0.03, '': 0.03}	1719	3.77186e-08	0.462891	0.98287	original		0.02	FALSE	FALSE	FALSE	out-of-context	{}
Mathematics	math_double	22 is to 44 as 16 is to	32	x	0.46	0	0	{'x': 0.46, 'what': 0.17, 'y': 0.12, '': 0.12, 'X': 0.05}	2326	8.6613e-08	0.460937	0.976822	original		0.02	FALSE	FALSE	FALSE	out-of-context	{}
Mathematics	math_double	22 is to 44 as 28 is to	56	x	0.46	0	0	{'x': 0.46, 'y': 0.18, 'what': 0.17, '': 0.05, 'X': 0.04}	2097	8.5216e-08	0.462891	0.979104	original		0.02	FALSE	FALSE	FALSE	out-of-context	{}
Mathematics	math_double	84 is to 168 as 74 is to	148	x	0.46	0	0	{'x': 0.46, 'what': 0.18, '': 0.17, 'y': 0.08, 'X': 0.04}	5774	1.93249e-08	0.462891	0.942463	original		0.02	FALSE	FALSE	FALSE	out-of-context	{}
Mathematics	math_double	88 is to 176 as 56 is to	112	x	0.46	0	0	{'x': 0.46, 'what': 0.24, 'y': 0.12, '': 0.11, 'X': 0.02}	5743	1.73459e-08	0.460937	0.942771	original		0.02	FALSE	FALSE	FALSE	out-of-context	{}
Mathematics	math_double	54 is to 108 as 74 is to	148	x	0.46	0	0	{'x': 0.46, 'what': 0.21, 'y': 0.13, '': 0.1, 'X': 0.03}	6308	1.15251e-08	0.462891	0.937141	original		0.02	FALSE	FALSE	FALSE	out-of-context	{}
Mathematics	math_double	55 is to 110 as 28 is to	56	x	0.46	0	0	{'x': 0.46, 'what': 0.2, 'y': 0.19, '': 0.07, '\\(': 0.02}	2146	4.49363e-08	0.464844	0.978615	original		0.02	FALSE	FALSE	FALSE	out-of-context	{}
Mathematics	math_double	55 is to 110 as 16 is to	32	x	0.46	0	0	{'x': 0.46, '': 0.18, 'what': 0.15, 'y': 0.12, 'X': 0.03}	2884	4.4005e-08	0.464844	0.971261	original		0.02	FALSE	FALSE	FALSE	out-of-context	{}
Mathematics	math_double	56 is to 112 as 46 is to	92	x	0.46	0	0	{'x': 0.46, 'what': 0.19, '': 0.16, 'y': 0.11, 'X': 0.02}	3557	2.98023e-08	0.457031	0.964555	original		0.02	FALSE	FALSE	FALSE	out-of-context	{}
Mathematics	math_double	74 is to 148 as 72 is to	144	x	0.46	0	0	{'x': 0.46, 'y': 0.21, 'what': 0.2, '': 0.04, '\\(': 0.03}	5478	1.55997e-08	0.455078	0.945412	original		0.02	FALSE	FALSE	FALSE	out-of-context	{}
Mathematics	math_division2	2 is to 1 as 62 is to	31	x	0.46	0	0	{'x': 0.46, '': 0.27, 'X': 0.06, 'y': 0.05, 'what': 0.05}	3447	1.71363e-07	0.464844	0.965651	original		0.02	FALSE	FALSE	FALSE	out-of-context	{}
Mathematics	math_squares	5 is to 25 as 25 is to	625		0.46	0	0	{'': 0.46, 'x': 0.24, 'X': 0.09, 'what': 0.06, 'y': 0.04}	8594	2.80561e-08	0.458984	0.914361	original		0.02	FALSE	FALSE	FALSE	out-of-context	{}
Mathematics	math_squares	14 is to 196 as 26 is to	676	x	0.46	0	0	{'x': 0.46, 'what': 0.23, 'y': 0.11, '': 0.1, 'X': 0.04}	18317	2.13913e-09	0.458984	0.817472	original		0.02	FALSE	FALSE	FALSE	out-of-context	{}
Mathematics	math_division2	66 is to 33 as 76 is to	38	x	0.46	0	0	{'x': 0.46, 'what': 0.18, 'y': 0.16, '': 0.09, 'X': 0.04}	5131	2.84053e-08	0.462891	0.94887	original		0.02	FALSE	FALSE	FALSE	out-of-context	{}
Mathematics	math_division2	62 is to 31 as 26 is to	13	x	0.46	0	0	{'x': 0.46, 'y': 0.21, 'what': 0.16, '': 0.08, '\\(': 0.02}	1274	1.35042e-07	0.458984	0.987305	original		0.02	FALSE	FALSE	FALSE	out-of-context	{}
Mathematics	math_division2	58 is to 29 as 96 is to	48	x	0.46	0	0	{'x': 0.46, 'y': 0.29, 'what': 0.13, '': 0.04, 'Y': 0.02}	1968	5.07571e-08	0.457031	0.980389	original		0.02	FALSE	FALSE	FALSE	out-of-context	{}
Mathematics	math_division2	64 is to 32 as 8 is to	4	x	0.46	0	0	{'x': 0.46, '': 0.2, 'what': 0.17, 'X': 0.04, 'y': 0.03}	516	1.95205e-06	0.462889	0.994858	original		0.02	FALSE	FALSE	FALSE	out-of-context	{}
Mathematics	math_division2	92 is to 46 as 34 is to	17	x	0.46	0	0	{'x': 0.46, 'what': 0.2, 'y': 0.14, '': 0.1, '\\(': 0.02}	1732	1.05705e-07	0.462891	0.982741	original		0.02	FALSE	FALSE	FALSE	out-of-context	{}
Mathematics	math_double	42 is to 84 as 28 is to	56	x	0.45	0	0	{'x': 0.45, 'what': 0.23, 'y': 0.13, '': 0.08, 'X': 0.03}	1475	9.59262e-08	0.451172	0.985302	original		0.02	FALSE	FALSE	FALSE	out-of-context	{}
Mathematics	math_double	38 is to 76 as 85 is to	170	x	0.45	0	0	{'x': 0.45, 'y': 0.23, 'what': 0.13, '': 0.07, 'X': 0.03}	2667	5.6345e-08	0.451172	0.973424	original		0.02	FALSE	FALSE	FALSE	out-of-context	{}
Mathematics	math_double	14 is to 28 as 15 is to	30	x	0.45	0	0	{'x': 0.45, 'what': 0.17, 'y': 0.15, '': 0.11, 'X': 0.05}	684	3.39001e-07	0.451172	0.993184	original		0.02	FALSE	FALSE	FALSE	out-of-context	{}
Mathematics	math_double	78 is to 156 as 74 is to	148	x	0.45	0	0	{'x': 0.45, 'what': 0.23, '': 0.13, 'y': 0.12, 'X': 0.02}	7236	9.77889e-09	0.449219	0.927894	original		0.02	FALSE	FALSE	FALSE	out-of-context	{}
Mathematics	math_double	98 is to 196 as 20 is to	40	x	0.45	0	0	{'x': 0.45, 'what': 0.22, '': 0.13, 'y': 0.07, 'X': 0.05}	881	3.44589e-07	0.447265	0.991221	original		0.02	FALSE	FALSE	FALSE	out-of-context	{}
Mathematics	math_double	96 is to 192 as 85 is to	170	x	0.45	0	0	{'x': 0.45, 'what': 0.22, '': 0.13, 'y': 0.09, '\\(': 0.03}	1711	1.13156e-07	0.449219	0.98295	original		0.02	FALSE	FALSE	FALSE	out-of-context	{}
Mathematics	math_double	94 is to 188 as 28 is to	56	x	0.45	0	0	{'x': 0.45, 'what': 0.24, 'y': 0.12, '': 0.11, 'X': 0.03}	1817	7.91624e-08	0.447266	0.981894	original		0.02	FALSE	FALSE	FALSE	out-of-context	{}
Mathematics	math_division2	54 is to 27 as 34 is to	17	x	0.45	0	0	{'x': 0.45, 'what': 0.17, 'y': 0.16, '': 0.12, 'X': 0.03}	1619	1.06171e-07	0.445312	0.983867	original		0.02	FALSE	FALSE	FALSE	out-of-context	{}
Mathematics	math_division2	54 is to 27 as 26 is to	13	x	0.45	0	0	{'x': 0.45, 'y': 0.17, 'what': 0.14, '': 0.12, 'X': 0.03}	1678	1.23866e-07	0.451172	0.983279	original		0.02	FALSE	FALSE	FALSE	out-of-context	{}
Mathematics	math_division2	42 is to 21 as 46 is to	23	x	0.45	0	0	{'x': 0.45, 'y': 0.21, 'what': 0.12, '': 0.09, '\\(': 0.04}	2184	6.70552e-08	0.449219	0.978237	original		0.02	FALSE	FALSE	FALSE	out-of-context	{}
Mathematics	math_division2	88 is to 44 as 46 is to	23	x	0.45	0	0	{'x': 0.45, '': 0.16, 'y': 0.15, 'what': 0.13, '\\(': 0.03}	2426	9.17353e-08	0.451172	0.975825	original		0.02	FALSE	FALSE	FALSE	out-of-context	{}
Mathematics	math_division2	76 is to 38 as 28 is to	14	x	0.45	0	0	{'x': 0.45, 'y': 0.25, 'what': 0.15, '': 0.06, '\\(': 0.03}	1041	1.51806e-07	0.453125	0.989627	original		0.02	FALSE	FALSE	FALSE	out-of-context	{}
Mathematics	math_double	42 is to 84 as 72 is to	144	x	0.44	0	0	{'x': 0.44, 'y': 0.18, 'what': 0.18, '': 0.07, '\\(': 0.05}	6385	1.55997e-08	0.4375	0.936374	original		0.02	FALSE	FALSE	FALSE	out-of-context	{}
Mathematics	math_double	14 is to 28 as 24 is to	48	x	0.44	0	0	{'x': 0.44, 'what': 0.2, 'y': 0.18, 'X': 0.06, '': 0.04}	1356	8.56817e-08	0.4375	0.986488	original		0.02	FALSE	FALSE	FALSE	out-of-context	{}
Mathematics	math_double	10 is to 20 as 74 is to	148	x	0.44	0	0	{'x': 0.44, 'what': 0.18, '': 0.18, 'y': 0.07, 'X': 0.06}	12127	4.27826e-09	0.443359	0.879155	original		0.02	FALSE	FALSE	FALSE	out-of-context	{}
Mathematics	math_double	82 is to 164 as 16 is to	32	x	0.44	0	0	{'x': 0.44, '': 0.2, 'what': 0.19, 'y': 0.05, 'X': 0.05}	2338	1.23866e-07	0.443359	0.976702	original		0.02	FALSE	FALSE	FALSE	out-of-context	{}
Mathematics	math_double	66 is to 132 as 28 is to	56	x	0.44	0	0	{'x': 0.44, 'what': 0.21, 'y': 0.14, '': 0.12, 'X': 0.03}	1965	7.45058e-08	0.443359	0.980419	original		0.02	FALSE	FALSE	FALSE	out-of-context	{}
Mathematics	math_division2	44 is to 22 as 26 is to	13	x	0.44	0	0	{'x': 0.44, 'what': 0.19, 'y': 0.18, '': 0.09, '\\(': 0.03}	1654	1.18744e-07	0.443359	0.983518	original		0.02	FALSE	FALSE	FALSE	out-of-context	{}
Mathematics	math_division2	98 is to 49 as 62 is to	31	x	0.44	0	0	{'x': 0.44, 'y': 0.17, 'what': 0.15, '': 0.11, 'X': 0.03}	5952	2.14204e-08	0.435547	0.940689	original		0.02	FALSE	FALSE	FALSE	out-of-context	{}
Mathematics	math_division2	64 is to 32 as 60 is to	30	x	0.44	0	0	{'x': 0.44, 'what': 0.2, 'y': 0.11, 'X': 0.06, '': 0.06}	3135	1.22003e-07	0.443359	0.96876	original		0.02	FALSE	FALSE	FALSE	out-of-context	{}
Mathematics	math_division2	66 is to 33 as 26 is to	13	x	0.44	0	0	{'x': 0.44, 'what': 0.18, 'y': 0.17, '': 0.1, 'X': 0.03}	1738	1.76951e-07	0.443359	0.982681	original		0.02	FALSE	FALSE	FALSE	out-of-context	{}
Mathematics	math_division2	84 is to 42 as 46 is to	23	x	0.44	0	0	{'x': 0.44, 'y': 0.23, 'what': 0.13, '': 0.09, '\\(': 0.03}	3030	4.6799e-08	0.439453	0.969806	original		0.02	FALSE	FALSE	FALSE	out-of-context	{}
Mathematics	math_division2	82 is to 41 as 62 is to	31	x	0.44	0	0	{'x': 0.44, 'y': 0.21, 'what': 0.14, '': 0.11, '\\(': 0.03}	4924	2.08383e-08	0.435547	0.950933	original		0.02	FALSE	FALSE	FALSE	out-of-context	{}
Mathematics	math_double	32 is to 64 as 24 is to	48	x	0.43	0	0	{'x': 0.43, 'what': 0.28, 'y': 0.1, 'X': 0.05, '': 0.05}	2907	6.65896e-08	0.431641	0.971032	original		0.02	FALSE	FALSE	FALSE	out-of-context	{}
Mathematics	math_double	44 is to 88 as 30 is to	60	x	0.43	0	0	{'x': 0.43, 'y': 0.18, 'what': 0.17, '': 0.1, 'X': 0.03}	1197	2.18861e-07	0.433594	0.988072	original		0.02	FALSE	FALSE	FALSE	out-of-context	{}
Mathematics	math_double	15 is to 30 as 28 is to	56	x	0.43	0	0	{'x': 0.43, 'y': 0.24, 'what': 0.17, '': 0.08, 'X': 0.03}	1792	3.63216e-08	0.425781	0.982143	original		0.02	FALSE	FALSE	FALSE	out-of-context	{}
Mathematics	math_double	10 is to 20 as 16 is to	32	x	0.43	0	0	{'x': 0.43, 'what': 0.19, 'y': 0.16, '': 0.1, 'X': 0.05}	1724	6.79865e-08	0.429687	0.98282	original		0.02	FALSE	FALSE	FALSE	out-of-context	{}
Mathematics	math_double	88 is to 176 as 74 is to	148	x	0.43	0	0	{'x': 0.43, 'what': 0.24, '': 0.14, 'y': 0.12, 'X': 0.02}	7016	1.64146e-08	0.433594	0.930086	original		0.02	FALSE	FALSE	FALSE	out-of-context	{}
Mathematics	math_double	82 is to 164 as 74 is to	148	x	0.43	0	0	{'x': 0.43, 'what': 0.27, '': 0.13, 'y': 0.08, 'X': 0.02}	7916	1.68802e-08	0.433594	0.921118	original		0.02	FALSE	FALSE	FALSE	out-of-context	{}
Mathematics	math_double	62 is to 124 as 74 is to	148	x	0.43	0	0	{'x': 0.43, 'what': 0.23, 'y': 0.17, '': 0.08, '\\(': 0.02}	7386	1.10012e-08	0.433594	0.926399	original		0.02	FALSE	FALSE	FALSE	out-of-context	{}
Mathematics	math_double	66 is to 132 as 74 is to	148	x	0.43	0	0	{'x': 0.43, 'what': 0.22, 'y': 0.16, '': 0.1, '\\(': 0.02}	8262	9.31323e-09	0.431641	0.91767	original		0.02	FALSE	FALSE	FALSE	out-of-context	{}
Mathematics	math_division2	44 is to 22 as 62 is to	31	x	0.43	0	0	{'x': 0.43, 'y': 0.19, 'what': 0.18, '': 0.1, '\\(': 0.03}	5148	2.17697e-08	0.425781	0.948701	original		0.02	FALSE	FALSE	FALSE	out-of-context	{}
Mathematics	math_squares	14 is to 196 as 25 is to	625	x	0.43	0	0	{'x': 0.43, 'what': 0.22, '': 0.15, 'y': 0.07, 'X': 0.06}	6518	1.71131e-08	0.433594	0.935049	original		0.02	FALSE	FALSE	FALSE	out-of-context	{}
Mathematics	math_division2	66 is to 33 as 64 is to	32	x	0.43	0	0	{'x': 0.43, 'y': 0.18, 'what': 0.17, '': 0.07, 'X': 0.04}	3992	7.17118e-08	0.431641	0.96022	original		0.02	FALSE	FALSE	FALSE	out-of-context	{}
Semantic Relations	animal_shelter	cockroach is to nest as locust is to	nest	swarm	0.43	0	0	{'swarm': 0.43, '______': 0.07, '__': 0.04, '____': 0.04, '_____': 0.03}	253	0.000131607	0.431509	0.997479	original		0.02	FALSE	FALSE	FALSE	out-of-context	{}
Mathematics	math_double	32 is to 64 as 28 is to	56	x	0.42	0	0	{'x': 0.42, 'what': 0.27, 'y': 0.12, '': 0.06, 'X': 0.05}	2955	7.54371e-08	0.419922	0.970554	original		0.02	FALSE	FALSE	FALSE	out-of-context	{}
Mathematics	math_double	32 is to 64 as 16 is to	32	x	0.42	0	0	{'x': 0.42, 'what': 0.18, '': 0.15, 'y': 0.07, 'X': 0.06}	1224	4.30271e-07	0.416015	0.987803	original		0.02	FALSE	FALSE	FALSE	out-of-context	{}
Mathematics	math_double	18 is to 36 as 28 is to	56	x	0.42	0	0	{'x': 0.42, 'y': 0.23, 'what': 0.22, '': 0.05, 'X': 0.03}	1709	5.00586e-08	0.419922	0.98297	original		0.02	FALSE	FALSE	FALSE	out-of-context	{}
Mathematics	math_double	18 is to 36 as 16 is to	32	x	0.42	0	0	{'x': 0.42, 'what': 0.24, 'y': 0.18, '': 0.07, 'X': 0.03}	2586	3.58559e-08	0.421875	0.974231	original		0.02	FALSE	FALSE	FALSE	out-of-context	{}
Mathematics	math_division2	98 is to 49 as 46 is to	23	x	0.42	0	0	{'x': 0.42, 'y': 0.15, 'what': 0.15, '': 0.14, 'X': 0.03}	2875	8.47504e-08	0.421875	0.971351	original		0.02	FALSE	FALSE	FALSE	out-of-context	{}
Mathematics	math_division2	68 is to 34 as 28 is to	14	x	0.42	0	0	{'x': 0.42, 'y': 0.18, 'what': 0.16, '': 0.12, '\\(': 0.03}	787	4.26546e-07	0.421875	0.992158	original		0.02	FALSE	FALSE	FALSE	out-of-context	{}
Factual Knowledge	name_nationality	galilei is to Italian as lavoisier is to	french	?	0.41	0	0	{'?': 0.05, '': 0.17, 'what': 0.09}	6	0.0169678	0.397095	0.99994	original		0.02	FALSE	FALSE	FALSE	out-of-context	{}
Mathematics	math_double	14 is to 28 as 16 is to	32	x	0.41	0	0	{'x': 0.41, 'y': 0.2, 'what': 0.17, '': 0.09, 'X': 0.05}	1341	1.15484e-07	0.410156	0.986637	original		0.02	FALSE	FALSE	FALSE	out-of-context	{}
Mathematics	math_double	16 is to 32 as 30 is to	60	x	0.41	0	0	{'x': 0.41, 'what': 0.25, 'y': 0.17, '': 0.07, 'X': 0.04}	1035	1.77883e-07	0.40625	0.989686	original		0.02	FALSE	FALSE	FALSE	out-of-context	{}
Mathematics	math_double	16 is to 32 as 74 is to	148	x	0.41	0	0	{'x': 0.41, 'what': 0.23, '': 0.16, 'X': 0.07, 'y': 0.06}	9197	1.04192e-08	0.414062	0.908353	original		0.02	FALSE	FALSE	FALSE	out-of-context	{}
Mathematics	math_double	28 is to 56 as 24 is to	48	x	0.41	0	0	{'x': 0.41, 'what': 0.33, 'y': 0.14, 'X': 0.04, '': 0.04}	1375	9.03383e-08	0.410156	0.986298	original		0.02	FALSE	FALSE	FALSE	out-of-context	{}
Mathematics	math_division2	68 is to 34 as 64 is to	32	x	0.41	0	0	{'x': 0.41, 'y': 0.18, 'what': 0.16, '': 0.1, 'X': 0.04}	3152	7.54371e-08	0.410156	0.968591	original		0.02	FALSE	FALSE	FALSE	out-of-context	{}
Mathematics	math_division2	58 is to 29 as 26 is to	13	x	0.41	0	0	{'x': 0.41, 'y': 0.22, 'what': 0.17, '': 0.1, '\\(': 0.02}	1509	1.38767e-07	0.414062	0.984963	original		0.02	FALSE	FALSE	FALSE	out-of-context	{}
Mathematics	math_division2	64 is to 32 as 62 is to	31	x	0.41	0	0	{'x': 0.41, 'what': 0.16, 'y': 0.13, '': 0.09, 'X': 0.07}	2232	1.99303e-07	0.414062	0.977758	original		0.02	FALSE	FALSE	FALSE	out-of-context	{}
Factual Knowledge	name_nationality	kepler is to German as lavoisier is to	french	?	0.4	0	0	{'?': 0.04, 'what': 0.22, '': 0.08}	10	0.0090332	0.387451	0.9999	original		0.02	FALSE	FALSE	FALSE	out-of-context	{}
Mathematics	math_double	46 is to 92 as 28 is to	56	x	0.4	0	0	{'x': 0.4, 'what': 0.31, 'y': 0.16, '': 0.06, '\\(': 0.02}	1551	6.65896e-08	0.402344	0.984544	original		0.02	FALSE	FALSE	FALSE	out-of-context	{}
Mathematics	math_double	66 is to 132 as 56 is to	112	x	0.4	0	0	{'x': 0.4, 'what': 0.22, 'y': 0.16, '': 0.12, 'X': 0.03}	8499	1.12923e-08	0.396484	0.915308	original		0.02	FALSE	FALSE	FALSE	out-of-context	{}
Mathematics	math_division2	44 is to 22 as 46 is to	23	x	0.4	0	0	{'x': 0.4, 'y': 0.2, 'what': 0.17, '': 0.1, 'X': 0.03}	1724	1.65775e-07	0.396484	0.98282	original		0.02	FALSE	FALSE	FALSE	out-of-context	{}
Mathematics	math_division2	58 is to 29 as 50 is to	25	x	0.4	0	0	{'x': 0.4, 'y': 0.23, 'what': 0.17, '': 0.08, '\\(': 0.03}	1176	2.12342e-07	0.398437	0.988281	original		0.02	FALSE	FALSE	FALSE	out-of-context	{}
Mathematics	math_division2	62 is to 31 as 46 is to	23	x	0.4	0	0	{'x': 0.4, 'y': 0.2, 'what': 0.2, '': 0.1, 'Y': 0.03}	1380	9.91859e-08	0.404297	0.986248	original		0.02	FALSE	FALSE	FALSE	out-of-context	{}
Verbal & Grammatical Forms	past_tense	taking is to took as reading is to	read	?	0.4	0	0	{'?': 0.15, '': 0.03}	13	0.0109863	0.389404	0.99987	original		0.02	FALSE	FALSE	FALSE	out-of-context	{}
Factual Knowledge	capital_world	Chisinau is to Moldova as Harare is to	zimbabwe	what	0.39	0	0	{'what': 0.39, '______': 0.15, 'which': 0.1, '__': 0.07, '?': 0.04}	6	0.0241699	0.368408	0.99994	original		0.02	FALSE	FALSE	FALSE	out-of-context	{}
Mathematics	math_double	44 is to 88 as 56 is to	112	x	0.39	0	0	{'x': 0.39, 'what': 0.21, 'y': 0.2, '': 0.09, 'X': 0.03}	6112	1.97906e-08	0.388672	0.939094	original		0.02	FALSE	FALSE	FALSE	out-of-context	{}
Mathematics	math_double	44 is to 88 as 74 is to	148	x	0.39	0	0	{'x': 0.39, 'what': 0.22, 'y': 0.17, '': 0.1, '\\(': 0.03}	7889	1.43191e-08	0.388672	0.921387	original		0.02	FALSE	FALSE	FALSE	out-of-context	{}
Mathematics	math_double	44 is to 88 as 28 is to	56	x	0.39	0	0	{'x': 0.39, 'what': 0.22, 'y': 0.18, '': 0.1, 'X': 0.03}	1283	1.78814e-07	0.392578	0.987215	original		0.02	FALSE	FALSE	FALSE	out-of-context	{}
Mathematics	math_double	94 is to 188 as 74 is to	148	x	0.39	0	0	{'x': 0.39, 'what': 0.29, '': 0.12, 'y': 0.12, 'X': 0.02}	6210	1.55997e-08	0.388672	0.938118	original		0.02	FALSE	FALSE	FALSE	out-of-context	{}
Mathematics	math_double	76 is to 152 as 74 is to	148	x	0.39	0	0	{'x': 0.39, 'what': 0.31, 'y': 0.13, '': 0.09, '\\(': 0.02}	6844	1.53668e-08	0.388672	0.9318	original		0.02	FALSE	FALSE	FALSE	out-of-context	{}
Mathematics	math_squares	28 is to 784 as 25 is to	625	x	0.39	0	0	{'x': 0.39, 'what': 0.21, '': 0.13, 'y': 0.07, 'X': 0.07}	1779	2.38419e-07	0.392578	0.982272	original		0.02	FALSE	FALSE	FALSE	out-of-context	{}
Mathematics	math_division2	68 is to 34 as 62 is to	31	x	0.39	0	0	{'x': 0.39, 'y': 0.19, 'what': 0.16, '': 0.13, '\\(': 0.03}	3958	4.51691e-08	0.392578	0.960559	original		0.02	FALSE	FALSE	FALSE	out-of-context	{}
Factual Knowledge	name_nationality	galilei is to Italian as mencius is to	chinese		0.38	0	0	{'': 0.04, '?': 0.07, 'what': 0.04}	5	0.020752	0.364014	0.99995	original		0.02	FALSE	FALSE	FALSE	out-of-context	{}
Mathematics	math_division2	58 is to 29 as 76 is to	38	x	0.38	0	0	{'x': 0.38, 'y': 0.27, 'what': 0.22, '': 0.05, 'Y': 0.03}	4675	1.72295e-08	0.376953	0.953414	original		0.02	FALSE	FALSE	FALSE	out-of-context	{}
Semantic Relations	animal_shelter	hamster is to nest as locust is to	nest	swarm	0.38	0	0	{'swarm': 0.38, '______': 0.06, 'plague': 0.05, '__': 0.05, '_____': 0.03}	488	4.48227e-05	0.380815	0.995137	original		0.02	FALSE	FALSE	FALSE	out-of-context	{}
Mathematics	math_double	15 is to 30 as 30 is to	60	x	0.37	0	0	{'x': 0.37, '': 0.29, 'y': 0.1, 'what': 0.09, 'X': 0.08}	504	9.23872e-07	0.36914	0.994978	original		0.02	FALSE	FALSE	FALSE	out-of-context	{}
Mathematics	math_division2	58 is to 29 as 46 is to	23	x	0.37	0	0	{'x': 0.37, 'y': 0.22, 'what': 0.22, '': 0.1, 'Y': 0.02}	1628	9.49949e-08	0.367187	0.983777	original		0.02	FALSE	FALSE	FALSE	out-of-context	{}
Mathematics	math_division2	66 is to 33 as 34 is to	17	x	0.37	0	0	{'x': 0.37, 'what': 0.21, '': 0.15, 'y': 0.13, 'X': 0.04}	2044	1.56462e-07	0.36914	0.979632	original		0.02	FALSE	FALSE	FALSE	out-of-context	{}
Factual Knowledge	UK_city_county	inverness is to highlands as southampton is to	hampshire	?	0.36	0	0	{'?': 0.05, '': 0.03}	1206	4.41074e-06	0.355464	0.987982	original		0.02	FALSE	FALSE	FALSE	out-of-context	{}
Mathematics	math_double	46 is to 92 as 85 is to	170	x	0.36	0	0	{'x': 0.36, 'what': 0.29, 'y': 0.19, '': 0.07, '\\(': 0.04}	2373	5.3551e-08	0.361328	0.976353	original		0.02	FALSE	FALSE	FALSE	out-of-context	{}
Mathematics	math_double	46 is to 92 as 74 is to	148	x	0.36	0	0	{'x': 0.36, 'what': 0.34, 'y': 0.17, '': 0.06, '\\(': 0.03}	8902	5.58794e-09	0.359375	0.911292	original		0.02	FALSE	FALSE	FALSE	out-of-context	{}
Mathematics	math_double	15 is to 30 as 16 is to	32	x	0.36	0	0	{'x': 0.36, 'y': 0.24, 'what': 0.19, '': 0.12, 'X': 0.03}	1430	5.56465e-08	0.363281	0.98575	original		0.02	FALSE	FALSE	FALSE	out-of-context	{}
Mathematics	math_double	16 is to 32 as 28 is to	56	x	0.36	0	0	{'x': 0.36, 'what': 0.28, 'y': 0.21, '': 0.05, 'X': 0.04}	1517	8.70787e-08	0.355469	0.984883	original		0.02	FALSE	FALSE	FALSE	out-of-context	{}
Mathematics	math_double	98 is to 196 as 16 is to	32	x	0.36	0	0	{'x': 0.36, '': 0.25, 'what': 0.2, 'y': 0.06, 'X': 0.04}	2222	1.1269e-07	0.363281	0.977858	original		0.02	FALSE	FALSE	FALSE	out-of-context	{}
Mathematics	math_double	98 is to 196 as 28 is to	56	x	0.36	0	0	{'x': 0.36, 'what': 0.3, '': 0.13, 'y': 0.09, 'X': 0.03}	1249	2.21655e-07	0.357422	0.987554	original		0.02	FALSE	FALSE	FALSE	out-of-context	{}
Factual Knowledge	capital_world	Chisinau is to Moldova as Libreville is to	gabon	what	0.35	0	0	{'what': 0.35, '?': 0.1, '______': 0.08, '': 0.06, 'which': 0.06}	13	0.00976562	0.335938	0.99987	original		0.02	FALSE	FALSE	FALSE	out-of-context	{}
Mathematics	math_double	98 is to 196 as 74 is to	148	x	0.35	0	0	{'x': 0.35, 'what': 0.31, 'y': 0.13, '': 0.11, '\\(': 0.03}	7210	1.29803e-08	0.347656	0.928153	original		0.02	FALSE	FALSE	FALSE	out-of-context	{}
Semantic Relations	animal_shelter	insect is to nest as locust is to	nest	swarm	0.35	0	0	{'swarm': 0.35, '______': 0.07, '_____': 0.05, '': 0.05, '__': 0.03}	901	1.84774e-05	0.349591	0.991022	original		0.02	FALSE	FALSE	FALSE	out-of-context	{}
Mathematics	math_division2	58 is to 29 as 62 is to	31	x	0.34	0	0	{'x': 0.34, 'y': 0.3, 'what': 0.17, '': 0.08, 'Y': 0.03}	3969	3.84171e-08	0.341797	0.960449	original		0.02	FALSE	FALSE	FALSE	out-of-context	{}
Factual Knowledge	UK_city_county	inverness is to highlands as stirling is to	stirlingshire	?	0.33	0	0	{'?': 0.04, '': 0.12, ':': 0.03}	164	0.00014782	0.333837	0.998366	original		0.02	FALSE	FALSE	FALSE	out-of-context	{}
Factual Knowledge	currency	Romania is to leu as Angola is to	kwanza	?	0.33	0	0	{'?': 0.07, '': 0.05, ':': 0.05}	873	5.45382e-06	0.333979	0.991301	original		0.02	FALSE	FALSE	FALSE	out-of-context	{}
Mathematics	math_double	98 is to 196 as 85 is to	170	x	0.33	0	0	{'x': 0.33, 'what': 0.29, 'y': 0.15, '': 0.11, '\\(': 0.03}	1953	9.82545e-08	0.333984	0.980539	original		0.02	FALSE	FALSE	FALSE	out-of-context	{}
Semantic Relations	animal_shelter	hamster is to nest as mouse is to	nest	bur	0.33	0	0	{'bur': 0.33, '_____': 0.07, '__': 0.05, '______': 0.04, 'what': 0.03}	23	0.00592041	0.328064	0.999771	original		0.02	FALSE	FALSE	FALSE	out-of-context	{}
Mathematics	math_double	12 is to 24 as 24 is to	48		0.32	0	0	{'': 0.32, 'x': 0.31, 'what': 0.12, 'y': 0.06, 'X': 0.05}	1103	8.19564e-07	0.320312	0.989009	original		0.02	FALSE	FALSE	FALSE	out-of-context	{}
Factual Knowledge	capital_world	Canberra is to Australia as Libreville is to	gabon	what	0.31	0	0	{'what': 0.31, '?': 0.03, 'which': 0.13, '?"': 0.03}	13	0.0117188	0.296875	0.99987	original		0.02	FALSE	FALSE	FALSE	out-of-context	{}
Morphological Modifiers	over+adj_reg	shadowed is to overshadowed as taken is to	overtaken	taken	0.31	0	0	{'taken': 0.31, '?': 0.03, '': 0.04}	543	3.40939e-05	0.312466	0.994589	original		0.02	FALSE	FALSE	FALSE	out-of-context	{}
Verbal & Grammatical Forms	verb_inf_Ved	decided is to decide as followed is to	follow	decide	0.31	0	0	{'decide': 0.31, 'do': 0.05, 'be': 0.05, 'think': 0.02, 'create': 0.02}	9	0.0128784	0.299622	0.99991	original		0.02	FALSE	FALSE	FALSE	out-of-context	{}
Mathematics	math_squares	26 is to 676 as 25 is to	625		0.3	0	0	{'': 0.3, 'what': 0.3, 'x': 0.15, '?': 0.07, 'X': 0.03}	491	3.62098e-06	0.304684	0.995107	original		0.02	FALSE	FALSE	FALSE	out-of-context	{}
Verbal & Grammatical Forms	plural	car is to cars as finger is to	fingers	hands	0.3	0	0	{'hands': 0.3, 'hand': 0.1, '': 0.09, '?': 0.07, 'a': 0.03}	9	0.0150146	0.28772	0.99991	original		0.02	FALSE	FALSE	FALSE	out-of-context	{}
Verbal & Grammatical Forms	noun_plural_reg	products is to product as versions is to	version	?	0.3	0	0	{'?': 0.3, '': 0.09, '"': 0.03}	42	0.00183105	0.296997	0.999581	original		0.02	FALSE	FALSE	FALSE	out-of-context	{}
Factual Knowledge	UK_city_county	gloucester is to gloucestershire as salford is to	manchester	what	0.29	0	0	{'what': 0.29, 'which': 0.12, '?': 0.03, '_': 0.03}	268	7.43866e-05	0.288988	0.997329	original		0.02	FALSE	FALSE	FALSE	out-of-context	{}
Factual Knowledge	name_nationality	copernicus is to Polish as lavoisier is to	french	?	0.29	0	0	{'?': 0.05, '': 0.06}	12	0.00823975	0.282776	0.99988	original		0.02	FALSE	FALSE	FALSE	out-of-context	{}
Semantic Hierarchies	hyponyms_misc	bunk is to bed as diamond is to	jewel	coal	0.29	0	0	{'coal': 0.29, 'graphite': 0.05, 'diamond': 0.04, '______': 0.03, '__': 0.03}	15	0.00994873	0.281067	0.999851	original		0.02	FALSE	FALSE	FALSE	out-of-context	{}
Factual Knowledge	capital_world	Gambia is to Banjul as Burundi is to	bujumbura		0.28	0	0	{'': 0.06, '?': 0.09, 'what': 0.03}	778	1.19805e-05	0.281238	0.992247	original		0.02	FALSE	FALSE	FALSE	out-of-context	{}
Morphological Modifiers	over+adj_reg	inflated is to overinflated as taken is to	overtaken	given	0.28	0	0	{'given': 0.28, '?': 0.05, 'returned': 0.04, '______': 0.04, '': 0.04}	111	0.00050354	0.27684	0.998894	original		0.02	FALSE	FALSE	FALSE	out-of-context	{}
Verbal & Grammatical Forms	verb_Ving_Ved	losing is to lost as replacing is to	replaced	?	0.28	0	0	{'?': 0.06, '': 0.07, ':': 0.03, 'what': 0.03}	564	3.62396e-05	0.279261	0.99438	original		0.02	FALSE	FALSE	FALSE	out-of-context	{}
Verbal & Grammatical Forms	verb_3pSg_Ved	described is to describes as followed is to	follows	describe	0.28	0	0	{'describe': 0.28, 'describes': 0.08, 'described': 0.06, 'be': 0.05, '': 0.02}	33	0.00259399	0.278656	0.999671	original		0.02	FALSE	FALSE	FALSE	out-of-context	{}
Factual Knowledge	UK_city_county	reading is to berkshire as stirling is to	stirlingshire	sc	0.27	0	0	{'sc': 0.27, '?': 0.02, '': 0.09, 'what': 0.03}	11	0.0105591	0.260925	0.99989	original		0.02	FALSE	FALSE	FALSE	out-of-context	{}
Factual Knowledge	capital_world	Vaduz is to Liechtenstein as Bishkek is to	kyrgyzstan	?	0.27	0	0	{'?': 0.1, 'what': 0.22, 'which': 0.05, '?"': 0.03}	15	0.00708008	0.262451	0.999851	original		0.02	FALSE	FALSE	FALSE	out-of-context	{}
Semantic Hierarchies	hypernyms_misc	chair is to armchair as appliance is to	fridge	?	0.27	0	0	{'?': 0.05, '': 0.09, 'what': 0.05, 'appliance': 0.05}	150	0.000284195	0.265341	0.998505	original		0.02	FALSE	FALSE	FALSE	out-of-context	{}
Verbal & Grammatical Forms	noun_plural_irreg	armies is to army as industries is to	industry		0.27	0	0	{'': 0.05, '?': 0.03}	18	0.00695801	0.262573	0.999821	original		0.02	FALSE	FALSE	FALSE	out-of-context	{}
Verbal & Grammatical Forms	verb_3pSg_Ved	loses is to lost as performs is to	performed		0.27	0	0	{'': 0.05, '?': 0.12, ':': 0.05}	876	2.11e-05	0.265604	0.991271	original		0.02	FALSE	FALSE	FALSE	out-of-context	{}
Semantic Hierarchies	hyponyms_misc	pot is to cookware as diamond is to	jewel	jewelry	0.26	0	0	{'jewelry': 0.26, 'gem': 0.17, 'carbon': 0.08, 'rocks': 0.08, 'coal': 0.07}	16	0.00637817	0.249481	0.999841	original		0.02	FALSE	FALSE	FALSE	out-of-context	{}
Semantic Hierarchies	hypernyms_animals	raptor is to falcon as primate is to	orangutan	monkey	0.25	0	0	{'monkey': 0.25, 'ape': 0.08, '______': 0.05, 'what': 0.05, '__': 0.03}	13	0.00976562	0.242188	0.99987	original		0.02	FALSE	FALSE	FALSE	out-of-context	{}
Verbal & Grammatical Forms	verb_Ving_3pSg	refers is to referring as suggests is to	suggesting	refer	0.25	0	0	{'refer': 0.25, 'the': 0.05, 'make': 0.03, 'reference': 0.02, 'point': 0.02}	159	0.000579834	0.248444	0.998416	original		0.02	FALSE	FALSE	FALSE	out-of-context	{}
Morphological Modifiers	over+adj_reg	laid is to overlaid as turned is to	overturned		0.24	0	0	{'': 0.1, '?': 0.17, ':': 0.1}	354	2.67029e-05	0.235325	0.996472	original		0.02	FALSE	FALSE	FALSE	out-of-context	{}
Verbal & Grammatical Forms	verb_inf_Ved	added is to add as followed is to	follow	add	0.24	0	0	{'add': 0.24, 'be': 0.04, 'do': 0.03, 'use': 0.03, 'create': 0.02}	20	0.00534058	0.23587	0.999801	original		0.02	FALSE	FALSE	FALSE	out-of-context	{}
Factual Knowledge	UK_city_county	wells is to somerset as winchester is to	hampshire	?	0.23	0	0	{'?': 0.18, 'what': 0.1, 'which': 0.07, '': 0.05}	419	3.50475e-05	0.232387	0.995825	original		0.02	FALSE	FALSE	FALSE	out-of-context	{}
Factual Knowledge	name_occupation	picasso is to painter as rembrandt is to	painter	what	0.23	0	0	{'what': 0.23, '?': 0.04, '"': 0.04, '': 0.04}	17	0.0102539	0.215332	0.999831	original		0.02	FALSE	FALSE	FALSE	out-of-context	{}
Semantic Hierarchies	hyponyms_misc	watercolor is to painting as polo is to	shirt	sports	0.23	0	0	{'sports': 0.23, 'football': 0.16, 'horse': 0.08, 'golf': 0.07, 'sport': 0.05}	1594	6.94394e-06	0.229485	0.984116	original		0.02	FALSE	FALSE	FALSE	out-of-context	{}
Semantic Relations	animal_shelter	seal is to den as tiger is to	den	jungle	0.23	0	0	{'jungle': 0.23, '______': 0.06, '__': 0.04, 'f': 0.03, '_____': 0.03}	153	0.000427246	0.228088	0.998475	original		0.02	FALSE	FALSE	FALSE	out-of-context	{}
Factual Knowledge	currency	Macedonia is to denar as India is to	rupee	(	0.22	0	0	{'(': 0.22, '': 0.08, '?': 0.06}	75	0.000762939	0.221893	0.999253	original		0.02	FALSE	FALSE	FALSE	out-of-context	{}
Factual Knowledge	name_nationality	aristotle is to Greek as lavoisier is to	french		0.22	0	0	{'': 0.07, '?': 0.07, 'what': 0.07}	6	0.0305176	0.188232	0.99994	original		0.02	FALSE	FALSE	FALSE	out-of-context	{}
Factual Knowledge	capital_world	Botswana is to Gaborone as Somalia is to	mogadishu	?	0.22	0	0	{'?': 0.12, '': 0.04, 'what': 0.04}	70	0.00106812	0.222565	0.999302	original		0.02	FALSE	FALSE	FALSE	out-of-context	{}
Morphological Modifiers	over+adj_reg	spent is to overspent as taken is to	overtaken	taken	0.22	0	0	{'taken': 0.22, 'given': 0.12, '______': 0.04, '____': 0.03, '?': 0.03}	20	0.00692749	0.208893	0.999801	original		0.02	FALSE	FALSE	FALSE	out-of-context	{}
Verbal & Grammatical Forms	adjective_to_adverb	most is to mostly as rapid is to	rapidly		0.22	0	0	{'': 0.07, '?': 0.04}	150	0.000227928	0.220475	0.998505	original		0.02	FALSE	FALSE	FALSE	out-of-context	{}
Verbal & Grammatical Forms	verb_inf_Ved	created is to create as followed is to	follow	create	0.22	0	0	{'create': 0.22, 'be': 0.05, 'do': 0.04, 'make': 0.04, 'use': 0.03}	31	0.00358582	0.218094	0.999691	original		0.02	FALSE	FALSE	FALSE	out-of-context	{}
Factual Knowledge	UK_city_county	exeter is to devon as stirling is to	stirlingshire	?	0.21	0	0	{'?': 0.21, '': 0.07, 'sc': 0.06, ':': 0.06, 'what': 0.04}	103	0.000663757	0.21125	0.998974	original		0.02	FALSE	FALSE	FALSE	out-of-context	{}
Factual Knowledge	UK_city_county	ely is to cambridgeshire as stirling is to	stirlingshire	sc	0.21	0	0	{'sc': 0.21, '?': 0.1, 'what': 0.09, 'which': 0.03}	79	0.000663757	0.204414	0.999213	original		0.02	FALSE	FALSE	FALSE	out-of-context	{}
Morphological Modifiers	adj_superlative	handy is to handiest as lengthy is to	lengthiest	lengthy	0.21	0	0	{'lengthy': 0.21, 'long': 0.15, 'short': 0.08, 'brief': 0.05, 'quick': 0.03}	20	0.00463867	0.205322	0.999801	original		0.02	FALSE	FALSE	FALSE	out-of-context	{}
Semantic Hierarchies	hypernyms_misc	furniture is to desk as clothes is to	sweater	closet	0.21	0	0	{'closet': 0.21, 'wardrobe': 0.06, '?': 0.05, 'suitcase': 0.04, 'what': 0.03}	107	0.000770569	0.206261	0.998934	original		0.02	FALSE	FALSE	FALSE	out-of-context	{}
Semantic Hierarchies	hyponyms_misc	monorail is to railway as polo is to	shirt	polo	0.21	0	0	{'polo': 0.21, 'football': 0.07, 'hockey': 0.06, '______': 0.04, 'horse': 0.04}	2754	3.8445e-06	0.212887	0.972557	original		0.02	FALSE	FALSE	FALSE	out-of-context	{}
Semantic Hierarchies	hyponyms_misc	chapel is to church as polo is to	shirt	polo	0.21	0	0	{'polo': 0.21, 'pol': 0.07, 'horse': 0.04, 'ball': 0.04, 'the': 0.03}	372	0.000144958	0.211769	0.996293	original		0.02	FALSE	FALSE	FALSE	out-of-context	{}
Semantic Relations	animal_sound	bear is to growl as leopard is to	growl	roar	0.21	0	0	{'roar': 0.21, '?': 0.07, ':': 0.04, '': 0.04}	27	0.00674438	0.203217	0.999731	original		0.02	FALSE	FALSE	FALSE	out-of-context	{}
Verbal & Grammatical Forms	noun_plural_irreg	armies is to army as technologies is to	technology		0.21	0	0	{'': 0.05, '?': 0.13, '"': 0.03}	17	0.00878906	0.205078	0.999831	original		0.02	FALSE	FALSE	FALSE	out-of-context	{}
Factual Knowledge	UK_city_county	chichester is to sussex as stirling is to	stirlingshire	?	0.2	0	0	{'?': 0.07, 'sc': 0.1, '': 0.06, 'what': 0.05}	45	0.00215149	0.199997	0.999552	original		0.02	FALSE	FALSE	FALSE	out-of-context	{}
Factual Knowledge	capital_world	Botswana is to Gaborone as Cyprus is to	nicosia		0.2	0	0	{'': 0.2, '?': 0.17, 'what': 0.05, ':': 0.04}	321	3.93391e-05	0.202109	0.996801	original		0.02	FALSE	FALSE	FALSE	out-of-context	{}
Morphological Modifiers	over+adj_reg	laid is to overlaid as taken is to	overtaken		0.2	0	0	{'': 0.06, '?': 0.17, ':': 0.12}	204	8.4877e-05	0.202064	0.997967	original		0.02	FALSE	FALSE	FALSE	out-of-context	{}
Morphological Modifiers	over+adj_reg	stated is to overstated as taken is to	overtaken	taken	0.2	0	0	{'taken': 0.2, 'given': 0.08, '______': 0.05, '____': 0.03, '': 0.03}	69	0.00166321	0.202438	0.999312	original		0.02	FALSE	FALSE	FALSE	out-of-context	{}
Semantic Hierarchies	hyponyms_misc	thundercloud is to cloud as diamond is to	jewel	coal	0.2	0	0	{'coal': 0.2, 'carbon': 0.16, 'graphite': 0.11, '______': 0.04, '__': 0.04}	63	0.00119019	0.199005	0.999372	original		0.02	FALSE	FALSE	FALSE	out-of-context	{}
Semantic Hierarchies	hypernyms_animals	feline is to leopard as raptor is to	vulture	hawk	0.2	0	0	{'hawk': 0.2, 'fal': 0.06, 'eagle': 0.06, '______': 0.06, 'what': 0.05}	523	4.17233e-05	0.1982	0.994788	original		0.02	FALSE	FALSE	FALSE	out-of-context	{}
Verbal & Grammatical Forms	plural_verbs	estimates is to estimate as says is to	say	estimate	0.2	0	0	{'estimate': 0.2, 'be': 0.03, 'use': 0.03, 'over': 0.03, 'make': 0.02}	7	0.0170898	0.178223	0.99993	original		0.02	FALSE	FALSE	FALSE	out-of-context	{}
Verbal & Grammatical Forms	verb_inf_Ved	identified is to identify as involved is to	involve	identify	0.2	0	0	{'identify': 0.2, 'be': 0.16, 'become': 0.03, 'have': 0.03, 'take': 0.02}	37	0.00309753	0.201004	0.999631	original		0.02	FALSE	FALSE	FALSE	out-of-context	{}
Factual Knowledge	country_capital	Baghdad is to Iraq as Conakry is to	guinea	what	0.19	0	0	{'what': 0.19, '___': 0.1, '______': 0.08, 'which': 0.06, '____': 0.05}	32	0.00424194	0.185211	0.999681	original		0.02	FALSE	FALSE	FALSE	out-of-context	{}
Factual Knowledge	capital_world	Baghdad is to Iraq as Conakry is to	guinea	what	0.19	0	0	{'what': 0.19, '___': 0.1, '______': 0.08, 'which': 0.06, '____': 0.05}	32	0.00424194	0.185211	0.999681	original		0.02	FALSE	FALSE	FALSE	out-of-context	{}
Semantic Hierarchies	hypernyms_misc	armchair is to chair as pastry is to	food		0.19	0	0	{'': 0.07, '?': 0.14, ':': 0.04}	31	0.00366211	0.190674	0.999691	original		0.02	FALSE	FALSE	FALSE	out-of-context	{}
Verbal & Grammatical Forms	adjective_to_adverb	calmly is to calm as reluctantly is to	reluctant		0.19	0	0	{'': 0.1, '?': 0.04, '______': 0.04, 'a': 0.03}	56	0.00212097	0.189285	0.999442	original		0.02	FALSE	FALSE	FALSE	out-of-context	{}
Verbal & Grammatical Forms	plural_verbs	swim is to swims as implement is to	implements		0.19	0	0	{'': 0.1, 'a': 0.07, '?': 0.07}	73	0.000713348	0.18581	0.999273	original		0.02	FALSE	FALSE	FALSE	out-of-context	{}
Verbal & Grammatical Forms	plural	hand is to hands as finger is to	fingers		0.19	0	0	{'': 0.1, '?': 0.04, ':': 0.08}	15	0.0090332	0.184326	0.999851	original		0.02	FALSE	FALSE	FALSE	out-of-context	{}
Verbal & Grammatical Forms	plural	horse is to horses as finger is to	fingers	hand	0.19	0	0	{'hand': 0.19, 'hands': 0.17, '?': 0.04, '': 0.03, '_____': 0.03}	21	0.00964355	0.178833	0.999791	original		0.02	FALSE	FALSE	FALSE	out-of-context	{}
Factual Knowledge	currency	Romania is to leu as Croatia is to	kuna	?	0.18	0	0	{'?': 0.18, 'what': 0.11, '': 0.05, '"': 0.04}	518	2.40803e-05	0.182593	0.994838	original		0.02	FALSE	FALSE	FALSE	out-of-context	{}
Factual Knowledge	name_nationality	dostoyevsky is to Russian as lavoisier is to	french	?	0.18	0	0	{'?': 0.06, '': 0.05, 'what': 0.1}	6	0.0510254	0.132568	0.99994	original		0.02	FALSE	FALSE	FALSE	out-of-context	{}
Factual Knowledge	capital_world	Libreville is to Gabon as Riga is to	latvia		0.18	0	0	{'': 0.18, 'what': 0.18, 'which': 0.13, '?': 0.08}	7	0.0292969	0.155273	0.99993	original		0.02	FALSE	FALSE	FALSE	out-of-context	{}
Factual Knowledge	capital_world	Chisinau is to Moldova as Conakry is to	guinea	what	0.18	0	0	{'what': 0.18, '______': 0.16, '': 0.09, '___': 0.08, '?': 0.05}	12	0.0106201	0.166138	0.99988	original		0.02	FALSE	FALSE	FALSE	out-of-context	{}
Factual Knowledge	capital_world	Morocco is to Rabat as Uzbekistan is to	tashkent	?	0.18	0	0	{'?': 0.06, '': 0.07, ':': 0.05}	2048	2.25008e-06	0.184568	0.979592	original		0.02	FALSE	FALSE	FALSE	out-of-context	{}
Morphological Modifiers	over+adj_reg	grown is to overgrown as painted is to	overpainted	?	0.18	0	0	{'?': 0.04, ':': 0.09, '': 0.07, 'painted': 0.05}	67	0.00123596	0.181381	0.999332	original		0.02	FALSE	FALSE	FALSE	out-of-context	{}
Semantic Hierarchies	hypernyms_misc	hairpin is to pin as pastry is to	food	pie	0.18	0	0	{'pie': 0.18, 'bake': 0.05, 'pastry': 0.04, 'dough': 0.04, '': 0.02}	21	0.00686646	0.170868	0.999791	original		0.02	FALSE	FALSE	FALSE	out-of-context	{}
Verbal & Grammatical Forms	adjective_to_adverb	quietly is to quiet as reluctantly is to	reluctant		0.18	0	0	{'': 0.09, 'resist': 0.05, '?': 0.03, '______': 0.03}	5	0.0253906	0.150391	0.99995	original		0.02	FALSE	FALSE	FALSE	out-of-context	{}
Verbal & Grammatical Forms	verb_3pSg_Ved	locates is to located as replaces is to	replaced	?	0.18	0	0	{'?': 0.06, '': 0.06, ':': 0.07}	397	5.19753e-05	0.180612	0.996044	original		0.02	FALSE	FALSE	FALSE	out-of-context	{}
Factual Knowledge	capital_world	Finland is to Helsinki as Bahrain is to	manama	?	0.17	0	0	{'?': 0.16, 'what': 0.08, '': 0.03}	195	0.000167847	0.170731	0.998057	original		0.02	FALSE	FALSE	FALSE	out-of-context	{}
Morphological Modifiers	verb+able_reg	acceptable is to accept as sustainable is to	sustain	accept	0.17	0	0	{'accept': 0.17, 'be': 0.04, 'ignore': 0.03, 'say': 0.02, 'have': 0.02}	19	0.00689697	0.160095	0.999811	original		0.02	FALSE	FALSE	FALSE	out-of-context	{}
Morphological Modifiers	over+adj_reg	laid is to overlaid as simplified is to	oversimplified		0.17	0	0	{'': 0.1, ':': 0.11, '?': 0.09}	34	0.00279236	0.1642	0.999661	original		0.02	FALSE	FALSE	FALSE	out-of-context	{}
Morphological Modifiers	over+adj_reg	laid is to overlaid as paid is to	overpaid	:	0.17	0	0	{':': 0.17, '': 0.08, '?': 0.11}	156	0.000135422	0.16881	0.998445	original		0.02	FALSE	FALSE	FALSE	out-of-context	{}
Verbal & Grammatical Forms	adjective_to_adverb	most is to mostly as serious is to	seriously		0.17	0	0	{'': 0.04, '?': 0.11, ':': 0.06}	238	0.000204086	0.174601	0.997628	original		0.02	FALSE	FALSE	FALSE	out-of-context	{}
Verbal & Grammatical Forms	plural	horses is to horse as birds is to	bird	______	0.17	0	0	{'______': 0.17, '____': 0.06, 'what': 0.06, '_____': 0.05, '__': 0.04}	7	0.0246582	0.14624	0.99993	original		0.02	FALSE	FALSE	FALSE	out-of-context	{}
Semantic Hierarchies	hyponyms_misc	tambourine is to drum as polo is to	shirt	polo	0.16	0	0	{'polo': 0.16, 'horse': 0.15, 'football': 0.06, 'soccer': 0.06, 'hockey': 0.04}	413	8.67844e-05	0.162023	0.995884	original		0.02	FALSE	FALSE	FALSE	out-of-context	{}
Verbal & Grammatical Forms	noun_plural_reg	cars is to car as members is to	member	?	0.16	0	0	{'?': 0.16, '': 0.06, 'club': 0.05, '______': 0.05, ':': 0.04}	120	0.000514984	0.160618	0.998804	original		0.02	FALSE	FALSE	FALSE	out-of-context	{}
Factual Knowledge	currency	Latvia is to lats as Angola is to	kwanza	?	0.15	0	0	{'?': 0.06, '': 0.06, ':': 0.05, '______': 0.04}	74	0.00094986	0.144558	0.999263	original		0.02	FALSE	FALSE	FALSE	out-of-context	{}
Semantic Hierarchies	hypernyms_misc	chair is to armchair as clothes is to	skirt	?	0.15	0	0	{'?': 0.04, '': 0.07, ':': 0.05, 'what': 0.04}	108	0.000751495	0.151592	0.998924	original		0.02	FALSE	FALSE	FALSE	out-of-context	{}
Verbal & Grammatical Forms	verb_inf_Ved	described is to describe as followed is to	follow	describe	0.15	0	0	{'describe': 0.15, 'be': 0.05, 'do': 0.04, 'say': 0.03, 'use': 0.03}	12	0.0136108	0.132874	0.99988	original		0.02	FALSE	FALSE	FALSE	out-of-context	{}
Factual Knowledge	UK_city_county	ely is to cambridgeshire as winchester is to	hampshire	what	0.14	0	0	{'what': 0.14, '?': 0.07, 'som': 0.05, '': 0.04}	114	0.000675201	0.140926	0.998864	original		0.02	FALSE	FALSE	FALSE	out-of-context	{}
Factual Knowledge	capital_world	Gaborone is to Botswana as Kathmandu is to	nepal	:	0.14	0	0	{':': 0.14, 'which': 0.1, '______': 0.09, '?': 0.08, '': 0.08}	5	0.0598145	0.0837402	0.99995	original		0.02	FALSE	FALSE	FALSE	out-of-context	{}
Factual Knowledge	capital_world	Zambia is to Lusaka as France is to	paris	?	0.14	0	0	{'?': 0.07, '': 0.08, ':': 0.07}	15	0.00848389	0.133118	0.999851	original		0.02	FALSE	FALSE	FALSE	out-of-context	{}
Factual Knowledge	capital_world	Algeria is to Algiers as Madagascar is to	antananarivo	?	0.14	0	0	{'?': 0.05, 'what': 0.06, '__': 0.05, '______': 0.05}	7	0.0397949	0.098877	0.99993	original		0.02	FALSE	FALSE	FALSE	out-of-context	{}
Semantic Hierarchies	hyponyms_misc	white is to color as diamond is to	jewel	gem	0.14	0	0	{'gem': 0.14, 'mineral': 0.06, 'diamond': 0.04, '______': 0.04, '"': 0.03}	6	0.0273438	0.111328	0.99994	original		0.02	FALSE	FALSE	FALSE	out-of-context	{}
Semantic Hierarchies	hypernyms_misc	chair is to armchair as jewelry is to	brooch	?	0.14	0	0	{'?': 0.14, '': 0.03, '"': 0.05, ':': 0.03}	161	0.000337601	0.138334	0.998396	original		0.02	FALSE	FALSE	FALSE	out-of-context	{}
Semantic Hierarchies	hypernyms_misc	chair is to armchair as jewelry is to	bracelet	?	0.14	0	0	{'?': 0.14, '': 0.03, '"': 0.05, ':': 0.03}	43	0.00346375	0.135208	0.999572	original		0.02	FALSE	FALSE	FALSE	out-of-context	{}
Factual Knowledge	currency	Denmark is to krone as Ukraine is to	hryvnia	:	0.13	0	0	{':': 0.05, '?': 0.09, 'what': 0.08, '': 0.05}	663	2.46763e-05	0.132788	0.993393	original		0.02	FALSE	FALSE	FALSE	out-of-context	{}
Factual Knowledge	currency	Denmark is to krone as India is to	rupee	?	0.13	0	0	{'?': 0.13, ':': 0.07, '': 0.07, '______': 0.06}	9	0.0224609	0.107422	0.99991	original		0.02	FALSE	FALSE	FALSE	out-of-context	{}
Factual Knowledge	capital_world	Nassau is to Bahamas as Thimphu is to	bhutan	?	0.13	0	0	{'?': 0.13, 'which': 0.06, '': 0.06, '______': 0.05, '"': 0.05}	15	0.015564	0.111389	0.999851	original		0.02	FALSE	FALSE	FALSE	out-of-context	{}
Factual Knowledge	capital_world	Bamako is to Mali as Harare is to	zimbabwe	______	0.13	0	0	{'______': 0.13, ':': 0.11, '__': 0.09, '': 0.06}	7	0.0507812	0.0810547	0.99993	original		0.02	FALSE	FALSE	FALSE	out-of-context	{}
Factual Knowledge	capital_world	Kenya is to Nairobi as Suriname is to	paramaribo	?	0.13	0	0	{'?': 0.13, 'A': 0.07, '': 0.06, ':': 0.05, '______': 0.05}	16	0.0135498	0.115356	0.999841	original		0.02	FALSE	FALSE	FALSE	out-of-context	{}
Factual Knowledge	capital_world	Morocco is to Rabat as Laos is to	vientiane	?	0.13	0	0	{'?': 0.11, '': 0.09, 'what': 0.08, ':': 0.04}	262	8.63075e-05	0.129797	0.997389	original		0.02	FALSE	FALSE	FALSE	out-of-context	{}
Factual Knowledge	capital_world	Nigeria is to Abuja as Madagascar is to	antananarivo	?	0.13	0	0	{'?': 0.08, 'what': 0.09, '': 0.09, '(': 0.03}	39	0.00268555	0.126221	0.999611	original		0.02	FALSE	FALSE	FALSE	out-of-context	{}
Morphological Modifiers	over+adj_reg	crowded is to overcrowded as taken is to	overtaken	taken	0.13	0	0	{'taken': 0.13, '______': 0.08, '?': 0.07, '': 0.04}	30	0.0039978	0.128815	0.999701	original		0.02	FALSE	FALSE	FALSE	out-of-context	{}
Semantic Hierarchies	hypernyms_misc	jewelry is to bracelet as clothes is to	skirt	shirt	0.13	0	0	{'shirt': 0.13, '?': 0.05, '': 0.05, 'what': 0.04, '"': 0.04}	21	0.0117188	0.12207	0.999791	original		0.02	FALSE	FALSE	FALSE	out-of-context	{}
Semantic Hierarchies	hypernyms_misc	jewelry is to bracelet as clothes is to	sweater	shirt	0.13	0	0	{'shirt': 0.13, '?': 0.05, '': 0.05, 'what': 0.04, '"': 0.04}	53	0.00279236	0.130997	0.999472	original		0.02	FALSE	FALSE	FALSE	out-of-context	{}
Semantic Hierarchies	hyponyms_misc	monorail is to railway as doll is to	toy	child	0.13	0	0	{'child': 0.13, 'baby': 0.09, '______': 0.04, 'doll': 0.04, 'girl': 0.03}	10	0.019043	0.112793	0.9999	original		0.02	FALSE	FALSE	FALSE	out-of-context	{}
Semantic Hierarchies	hypernyms_animals	rodent is to mouse as primate is to	orangutan	monkey	0.13	0	0	{'monkey': 0.13, '______': 0.1, '____': 0.07, 'ape': 0.06, '_____': 0.05}	33	0.00405884	0.126801	0.999671	original		0.02	FALSE	FALSE	FALSE	out-of-context	{}
Semantic Hierarchies	hypernyms_animals	fowl is to duck as raptor is to	vulture	hawk	0.13	0	0	{'hawk': 0.13, '': 0.05, '?': 0.05}	1417	6.67572e-06	0.132806	0.98588	original		0.02	FALSE	FALSE	FALSE	out-of-context	{}
Semantic Hierarchies	hypernyms_animals	fowl is to duck as raptor is to	falcon	hawk	0.13	0	0	{'hawk': 0.13, '': 0.05, '?': 0.05}	68	0.00114441	0.131668	0.999322	original		0.02	FALSE	FALSE	FALSE	out-of-context	{}
Semantic Hierarchies	hypernyms_animals	fowl is to turkey as raptor is to	vulture	hawk	0.13	0	0	{'hawk': 0.13, '?': 0.04, '': 0.04}	1197	1.35899e-05	0.125963	0.988072	original		0.02	FALSE	FALSE	FALSE	out-of-context	{}
Semantic Hierarchies	hypernyms_animals	fowl is to duck as fowl is to	turkey	______	0.13	0	0	{'______': 0.13, '____': 0.07, '_____': 0.06, '': 0.06, 'what': 0.05}	25	0.00610352	0.123779	0.999751	original		0.02	FALSE	FALSE	FALSE	out-of-context	{}
Semantic Relations	antonyms_binary	descend is to climb as entrance is to	exit		0.13	0	0	{'': 0.04, ':': 0.09, '?': 0.05}	23	0.00921631	0.117737	0.999771	original		0.02	FALSE	FALSE	FALSE	out-of-context	{}
Verbal & Grammatical Forms	past_tense	increasing is to increased as shrinking is to	shrank	decreasing	0.13	0	0	{'decreasing': 0.13, '': 0.09, '"': 0.05, '______': 0.05}	260	0.000144005	0.130715	0.997409	original		0.02	FALSE	FALSE	FALSE	out-of-context	{}
Verbal & Grammatical Forms	noun_plural_reg	friends is to friend as villages is to	village	?	0.13	0	0	{'?': 0.06, '': 0.09, 'what': 0.04}	9	0.0203857	0.112427	0.99991	original		0.02	FALSE	FALSE	FALSE	out-of-context	{}
Verbal & Grammatical Forms	verb_inf_Ved	considered is to consider as followed is to	follow	consider	0.13	0	0	{'consider': 0.13, 'think': 0.05, 'be': 0.05, 'see': 0.04, 'create': 0.04}	19	0.00653076	0.124329	0.999811	original		0.02	FALSE	FALSE	FALSE	out-of-context	{}
Factual Knowledge	currency	Denmark is to krone as Latvia is to	lats	what	0.12	0	0	{'what': 0.12, ':': 0.11, '?': 0.08, '': 0.05}	35	0.0032959	0.116333	0.999651	original		0.02	FALSE	FALSE	FALSE	out-of-context	{}
Semantic Hierarchies	hypernyms_misc	toiletry is to lotion as clothes is to	shirt		0.12	0	0	{'': 0.03, '?': 0.09, ':': 0.06, 'what': 0.04}	5	0.0314941	0.0925293	0.99995	original		0.02	FALSE	FALSE	FALSE	out-of-context	{}
Semantic Hierarchies	hypernyms_misc	toiletry is to lotion as clothes is to	skirt		0.12	0	0	{'': 0.03, '?': 0.09, ':': 0.06, 'what': 0.04}	141	0.000492096	0.123531	0.998595	original		0.02	FALSE	FALSE	FALSE	out-of-context	{}
Semantic Hierarchies	hypernyms_misc	net is to hairnet as clothes is to	skirt		0.12	0	0	{'': 0.05, ':': 0.05, '?': 0.1}	210	0.000184059	0.121886	0.997907	original		0.02	FALSE	FALSE	FALSE	out-of-context	{}
Semantic Hierarchies	hypernyms_misc	net is to hairnet as clothes is to	sweater		0.12	0	0	{'': 0.05, ':': 0.05, '?': 0.1}	320	0.000101566	0.121969	0.996811	original		0.02	FALSE	FALSE	FALSE	out-of-context	{}
Semantic Hierarchies	hyponyms_misc	tambourine is to drum as thermos is to	flask		0.12	0	0	{'': 0.1, '?': 0.04, ':': 0.03}	25	0.00946045	0.105774	0.999751	original		0.02	FALSE	FALSE	FALSE	out-of-context	{}
Semantic Hierarchies	hypernyms_animals	rodent is to chinchilla as fowl is to	turkey	______	0.12	0	0	{'______': 0.12, '____': 0.07, '_____': 0.06, 'what': 0.06, 'ostr': 0.04}	12	0.0155029	0.102661	0.99988	original		0.02	FALSE	FALSE	FALSE	out-of-context	{}
Semantic Hierarchies	hypernyms_animals	rodent is to chinchilla as fowl is to	duck	______	0.12	0	0	{'______': 0.12, '____': 0.07, '_____': 0.06, 'what': 0.06, 'ostr': 0.04}	10	0.0198975	0.0982666	0.9999	original		0.02	FALSE	FALSE	FALSE	out-of-context	{}
Semantic Hierarchies	hypernyms_animals	rodent is to squirrel as fowl is to	turkey	______	0.12	0	0	{'______': 0.12, '': 0.06, ':': 0.05, '_____': 0.05, 'what': 0.05}	45	0.00299072	0.11322	0.999552	original		0.02	FALSE	FALSE	FALSE	out-of-context	{}
Semantic Hierarchies	hypernyms_animals	feline is to cat as raptor is to	vulture	what	0.12	0	0	{'what': 0.12, 'hawk': 0.08, '______': 0.06, '____': 0.05, '_____': 0.04}	824	1.51396e-05	0.117172	0.991789	original		0.02	FALSE	FALSE	FALSE	out-of-context	{}
Semantic Hierarchies	hypernyms_animals	feline is to cat as raptor is to	owl	what	0.12	0	0	{'what': 0.12, 'hawk': 0.08, '______': 0.06, '____': 0.05, '_____': 0.04}	57	0.00195312	0.115234	0.999432	original		0.02	FALSE	FALSE	FALSE	out-of-context	{}
Semantic Relations	animal_sound	buzz is to wasp as howl is to	wolf	roar	0.12	0	0	{'roar': 0.12, '?': 0.05, '': 0.05}	14	0.0136108	0.107483	0.99986	original		0.02	FALSE	FALSE	FALSE	out-of-context	{}
Semantic Relations	animal_shelter	hamster is to nest as scorpion is to	nest	sting	0.12	0	0	{'sting': 0.12, '______': 0.05, ':': 0.05, '': 0.04, 'bur': 0.04}	94	0.00114441	0.118973	0.999063	original		0.02	FALSE	FALSE	FALSE	out-of-context	{}
Verbal & Grammatical Forms	plural	fingers is to finger as birds is to	bird	______	0.12	0	0	{'______': 0.12, 'feathers': 0.05, 'fly': 0.05, 'wings': 0.05, 'what': 0.04}	23	0.00842285	0.107788	0.999771	original		0.02	FALSE	FALSE	FALSE	out-of-context	{}
Verbal & Grammatical Forms	noun_plural_reg	friends is to friend as members is to	member	______	0.12	0	0	{'______': 0.12, '?': 0.1, '': 0.05, 'what': 0.08}	45	0.00340271	0.112808	0.999552	original		0.02	FALSE	FALSE	FALSE	out-of-context	{}
Factual Knowledge	currency	Macedonia is to denar as Ukraine is to	hryvnia		0.11	0	0	{'': 0.06, '?': 0.09, '"': 0.06, ':': 0.06}	925	1.3411e-05	0.110338	0.990782	original		0.02	FALSE	FALSE	FALSE	out-of-context	{}
Factual Knowledge	currency	Poland is to zloty as Brazil is to	real	?	0.11	0	0	{'?': 0.11, 'what': 0.09, '(': 0.04, '"': 0.04, ':': 0.04}	25	0.0101318	0.102173	0.999751	original		0.02	FALSE	FALSE	FALSE	out-of-context	{}
Factual Knowledge	capital_world	Niger is to Niamey as Suriname is to	paramaribo	?	0.11	0	0	{'?': 0.11, '': 0.04, 'A': 0.07}	31	0.00579834	0.100159	0.999691	original		0.02	FALSE	FALSE	FALSE	out-of-context	{}
Morphological Modifiers	over+adj_reg	subscribed is to oversubscribed as used is to	overused	______	0.11	0	0	{'______': 0.11, 'new': 0.09, 'unused': 0.07, '____': 0.04, '': 0.04}	58	0.00193787	0.104019	0.999422	original		0.02	FALSE	FALSE	FALSE	out-of-context	{}
Semantic Hierarchies	hyponyms_misc	tambourine is to drum as diamond is to	jewel	coal	0.11	0	0	{'coal': 0.11, 'diamond': 0.07, 'carbon': 0.05, 'graphite': 0.05, '__': 0.04}	14	0.0147095	0.093689	0.99986	original		0.02	FALSE	FALSE	FALSE	out-of-context	{}
Semantic Hierarchies	hyponyms_misc	thundercloud is to cloud as polo is to	shirt		0.11	0	0	{'': 0.06, ':': 0.04, '___': 0.03, '"': 0.03}	109	0.00111389	0.109238	0.998914	original		0.02	FALSE	FALSE	FALSE	out-of-context	{}
Semantic Hierarchies	hyponyms_misc	choker is to collar as diamond is to	jewel	?	0.11	0	0	{'?': 0.11, '': 0.04, '______': 0.07, 'diamond': 0.04}	38	0.00454712	0.101898	0.999621	original		0.02	FALSE	FALSE	FALSE	out-of-context	{}
Semantic Hierarchies	hyponyms_misc	chapel is to church as bag is to	container	purse	0.11	0	0	{'purse': 0.11, 'bag': 0.07, '______': 0.06, 'a': 0.03, '___': 0.03}	238	0.000322342	0.111006	0.997628	original		0.02	FALSE	FALSE	FALSE	out-of-context	{}
Semantic Hierarchies	hyponyms_misc	chapel is to church as diamond is to	jewel	coal	0.11	0	0	{'coal': 0.11, 'diamond': 0.08, '______': 0.06, '__': 0.05, 'carbon': 0.04}	8	0.0250244	0.0872803	0.99992	original		0.02	FALSE	FALSE	FALSE	out-of-context	{}
Semantic Hierarchies	hyponyms_misc	limousine is to car as thermos is to	flask		0.11	0	0	{'': 0.09, ':': 0.04, '?': 0.05}	23	0.0100098	0.104736	0.999771	original		0.02	FALSE	FALSE	FALSE	out-of-context	{}
Semantic Hierarchies	hyponyms_misc	lemon is to citrus as polo is to	shirt	what	0.11	0	0	{'what': 0.11, '': 0.09, ':': 0.05, '?': 0.04, '"': 0.03}	56	0.00291443	0.103043	0.999442	original		0.02	FALSE	FALSE	FALSE	out-of-context	{}
Semantic Hierarchies	hyponyms_misc	hamburger is to burger as bag is to	container	bag	0.11	0	0	{'bag': 0.11, '______': 0.07, '___': 0.07, 'what': 0.05, '____': 0.04}	322	0.000132561	0.107778	0.996791	original		0.02	FALSE	FALSE	FALSE	out-of-context	{}
Semantic Hierarchies	hypernyms_animals	raptor is to owl as snake is to	viper	______	0.11	0	0	{'______': 0.11, '_____': 0.06, '____': 0.05, '__': 0.03, 'what': 0.02}	8	0.0200195	0.0883789	0.99992	original		0.02	FALSE	FALSE	FALSE	out-of-context	{}
Semantic Hierarchies	hypernyms_animals	raptor is to owl as snake is to	rattlesnake	______	0.11	0	0	{'______': 0.11, '_____': 0.06, '____': 0.05, '__': 0.03, 'what': 0.02}	35	0.0057373	0.102661	0.999651	original		0.02	FALSE	FALSE	FALSE	out-of-context	{}
Verbal & Grammatical Forms	past_tense	falling is to fell as shrinking is to	shrank		0.11	0	0	{'': 0.06, '?': 0.06, '______': 0.05, 'shrink': 0.04}	24	0.00753784	0.103302	0.999761	original		0.02	FALSE	FALSE	FALSE	out-of-context	{}
Verbal & Grammatical Forms	plural	rats is to rat as buildings is to	building	?	0.11	0	0	{'?': 0.11, 'what': 0.07, '______': 0.06, '': 0.06, '__': 0.04}	17	0.0125122	0.0988159	0.999831	original		0.02	FALSE	FALSE	FALSE	out-of-context	{}
Verbal & Grammatical Forms	noun_plural_reg	friends is to friend as things is to	thing	what	0.11	0	0	{'what': 0.11, '': 0.08, '?': 0.04}	14	0.0152588	0.0906982	0.99986	original		0.02	FALSE	FALSE	FALSE	out-of-context	{}
Verbal & Grammatical Forms	noun_plural_reg	cars is to car as versions is to	version		0.11	0	0	{'': 0.08, '?': 0.1, ':': 0.06, '"': 0.05}	63	0.00180817	0.110008	0.999372	original		0.02	FALSE	FALSE	FALSE	out-of-context	{}
Factual Knowledge	UK_city_county	leicester is to midlands as stirling is to	stirlingshire	?	0.1	0	0	{'?': 0.05, '': 0.07, 'sc': 0.04, '"': 0.03}	169	0.000404358	0.0982285	0.998316	original		0.02	FALSE	FALSE	FALSE	out-of-context	{}
Factual Knowledge	currency	Croatia is to kuna as Ukraine is to	hryvnia	:	0.1	0	0	{':': 0.1, '?': 0.09, 'what': 0.05, '': 0.04}	389	6.07967e-05	0.10492	0.996124	original		0.02	FALSE	FALSE	FALSE	out-of-context	{}
Factual Knowledge	currency	Croatia is to kuna as Latvia is to	lats	?	0.1	0	0	{'?': 0.1, 'what': 0.09, 'euro': 0.08, ':': 0.07, '': 0.04}	16	0.0130005	0.0831909	0.999841	original		0.02	FALSE	FALSE	FALSE	out-of-context	{}
Morphological Modifiers	verb+able_reg	recognizable is to recognize as reliable is to	rely	recognize	0.1	0	0	{'recognize': 0.1, 'trust': 0.06, 'be': 0.05, 'know': 0.03, 'believe': 0.03}	8	0.0206299	0.0843506	0.99992	original		0.02	FALSE	FALSE	FALSE	out-of-context	{}
Semantic Hierarchies	hypernyms_misc	furniture is to shelf as clothes is to	shirt	closet	0.1	0	0	{'closet': 0.1, '?': 0.1, '': 0.08, ':': 0.05, 'what': 0.04}	89	0.000972748	0.101566	0.999113	original		0.02	FALSE	FALSE	FALSE	out-of-context	{}
Semantic Hierarchies	hypernyms_misc	furniture is to shelf as clothes is to	skirt	closet	0.1	0	0	{'closet': 0.1, '?': 0.1, '': 0.08, ':': 0.05, 'what': 0.04}	597	3.55244e-05	0.102504	0.994051	original		0.02	FALSE	FALSE	FALSE	out-of-context	{}
Semantic Hierarchies	hypernyms_misc	toiletry is to deodorant as clothes is to	shirt	?	0.1	0	0	{'?': 0.1, ':': 0.04, '': 0.09, 'what': 0.07}	6	0.0296631	0.0675049	0.99994	original		0.02	FALSE	FALSE	FALSE	out-of-context	{}
Semantic Hierarchies	hypernyms_misc	toiletry is to deodorant as clothes is to	skirt	?	0.1	0	0	{'?': 0.1, ':': 0.04, '': 0.09, 'what': 0.07}	128	0.000576019	0.0965919	0.998724	original		0.02	FALSE	FALSE	FALSE	out-of-context	{}
Semantic Hierarchies	hypernyms_animals	ant is to insect as chinchilla is to	rodent	mamm	0.1	0	0	{'mamm': 0.1, '?': 0.05, '': 0.05}	13	0.024292	0.0777588	0.99987	original		0.02	FALSE	FALSE	FALSE	out-of-context	{}
Semantic Hierarchies	hypernyms_animals	bovid is to cow as dinosaur is to	triceratops	bird	0.1	0	0	{'bird': 0.1, '______': 0.08, 'dinosaur': 0.06, 'lizard': 0.05, 'what': 0.05}	21	0.00970459	0.0942993	0.999791	original		0.02	FALSE	FALSE	FALSE	out-of-context	{}
Semantic Hierarchies	hypernyms_animals	canine is to fox as fowl is to	turkey	______	0.1	0	0	{'______': 0.1, 'what': 0.07, '_____': 0.05, '____': 0.04, 'duck': 0.04}	23	0.0107422	0.0883789	0.999771	original		0.02	FALSE	FALSE	FALSE	out-of-context	{}
Semantic Hierarchies	hyponyms_misc	pouch is to bag as diamond is to	jewel	gem	0.1	0	0	{'gem': 0.1, 'diamond': 0.08, '?': 0.05, 'ring': 0.05, '______': 0.04}	6	0.0354004	0.0671387	0.99994	original		0.02	FALSE	FALSE	FALSE	out-of-context	{}
Semantic Hierarchies	hyponyms_misc	ferry is to boat as limousine is to	car		0.1	0	0	{'': 0.05, ':': 0.07, '?': 0.07}	5	0.0424805	0.0595703	0.99995	original		0.02	FALSE	FALSE	FALSE	out-of-context	{}
Semantic Hierarchies	hyponyms_misc	chapel is to church as doll is to	toy	______	0.1	0	0	{'______': 0.1, '_____': 0.08, '____': 0.06, '__': 0.06, 'child': 0.03}	8	0.0229492	0.0800781	0.99992	original		0.02	FALSE	FALSE	FALSE	out-of-context	{}
Semantic Hierarchies	hypernyms_animals	feline is to lion as fowl is to	turkey	______	0.1	0	0	{'______': 0.1, 'what': 0.08, '____': 0.07, '_____': 0.06, 'chicken': 0.04}	15	0.0146484	0.090332	0.999851	original		0.02	FALSE	FALSE	FALSE	out-of-context	{}
Semantic Relations	antonyms_gradable	concerned is to unconcerned as noisy is to	silent		0.1	0	0	{'': 0.06, '?': 0.08, '______': 0.05, ':': 0.05}	52	0.00234985	0.0943298	0.999482	original		0.02	FALSE	FALSE	FALSE	out-of-context	{}
Verbal & Grammatical Forms	past_tense	hiding is to hid as shrinking is to	shrank	______	0.1	0	0	{'______': 0.1, '': 0.04, '__': 0.06, '_____': 0.04}	17	0.0090332	0.0881348	0.999831	original		0.02	FALSE	FALSE	FALSE	out-of-context	{}
Verbal & Grammatical Forms	plural	lions is to lion as birds is to	bird	______	0.1	0	0	{'______': 0.1, 'what': 0.08, '?': 0.06, 'a': 0.04, '____': 0.04}	51	0.0025177	0.100998	0.999492	original		0.02	FALSE	FALSE	FALSE	out-of-context	{}
Verbal & Grammatical Forms	plural	snakes is to snake as buildings is to	building	?	0.1	0	0	{'?': 0.1, '': 0.04, 'what': 0.06, '______': 0.04}	13	0.0180664	0.0795898	0.99987	original		0.02	FALSE	FALSE	FALSE	out-of-context	{}
Factual Knowledge	UK_city_county	leicester is to midlands as winchester is to	hampshire		0.09	0	0	{'': 0.04, 'south': 0.09, '?': 0.03}	205	0.000268936	0.0866451	0.997957	original		0.02	FALSE	FALSE	FALSE	out-of-context	{}
Morphological Modifiers	verb+able_reg	definable is to define as sustainable is to	sustain	define	0.09	0	0	{'define': 0.09, 'be': 0.04, 'make': 0.03, 'say': 0.02, 'have': 0.02}	24	0.00643921	0.0853577	0.999761	original		0.02	FALSE	FALSE	FALSE	out-of-context	{}
Morphological Modifiers	adj+ness_reg	carefulness is to careful as innovativeness is to	innovative		0.09	0	0	{'': 0.07, ':': 0.07, '______': 0.06, '"': 0.05}	5	0.0444336	0.0439453	0.99995	original		0.02	FALSE	FALSE	FALSE	out-of-context	{}
[truncated: 8,054 more rows]

## Sheet: num_stats
	count	mean	std	min	25%	50%	75%	max
[truncated: 8 more rows]

[truncated: 8 more sheets: precision_stats, area_stats, domain_stats, unbunding_type_stats, extracted_factors_stats, generated_token_stats, next_token_precision@5_stats, best_item_type_stats]
