# Supplementary material
Source: ML conference proceedings conference paper supplement (https://openreview.net/forum?id=MSm0VFL9pq)
Supplement: supplementary_material [file Overview GPT-2.pdf › code/outputs/Overview GPT-2.pdf]

### NEXT TOKEN PRECISION@1

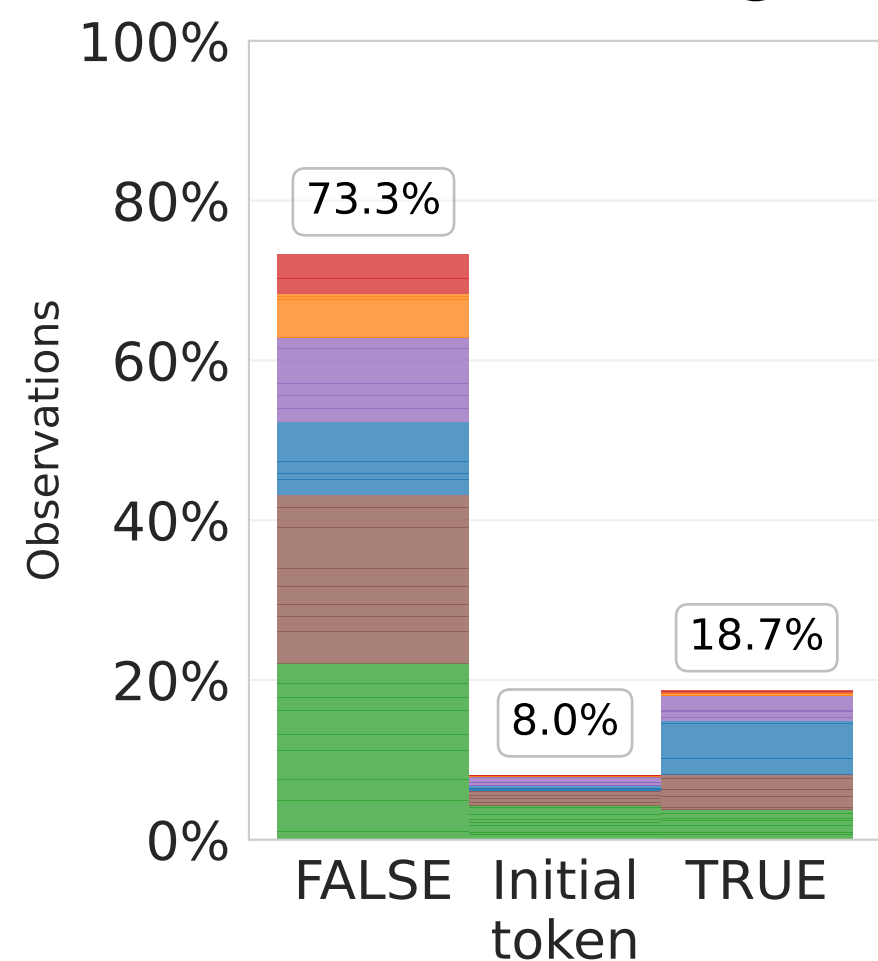

### NEXTTOKEN PRECISION@5

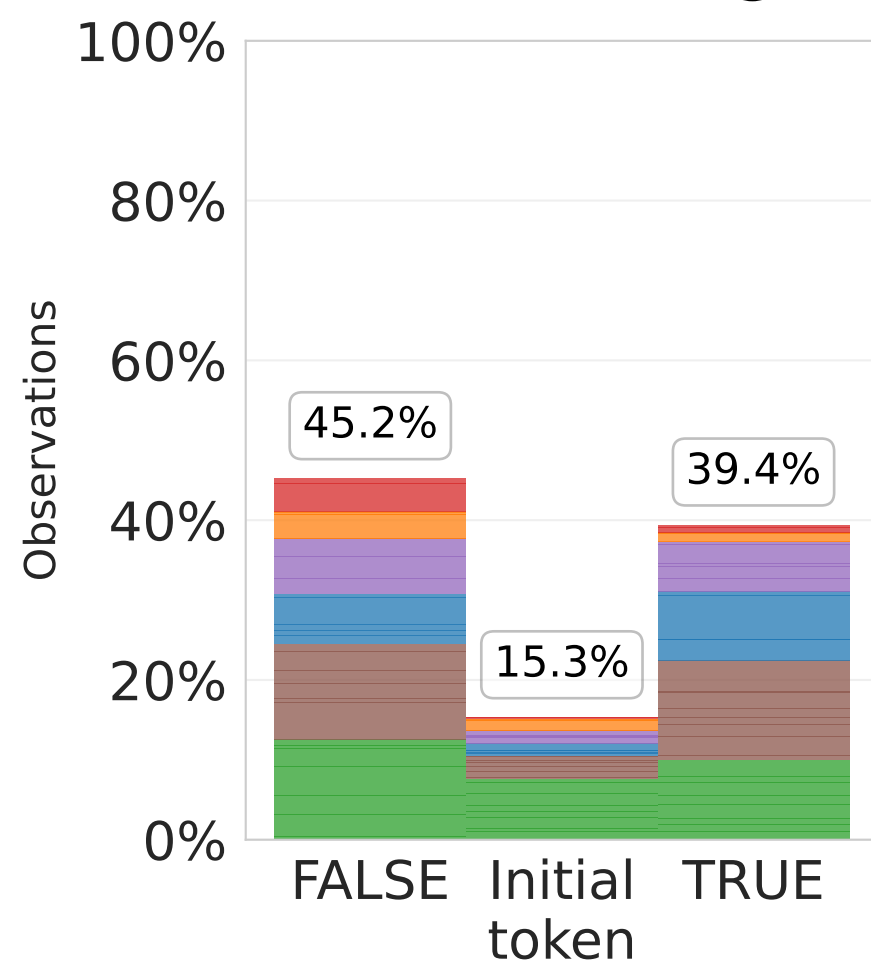

### NEXTTOKEN SOFTMAX

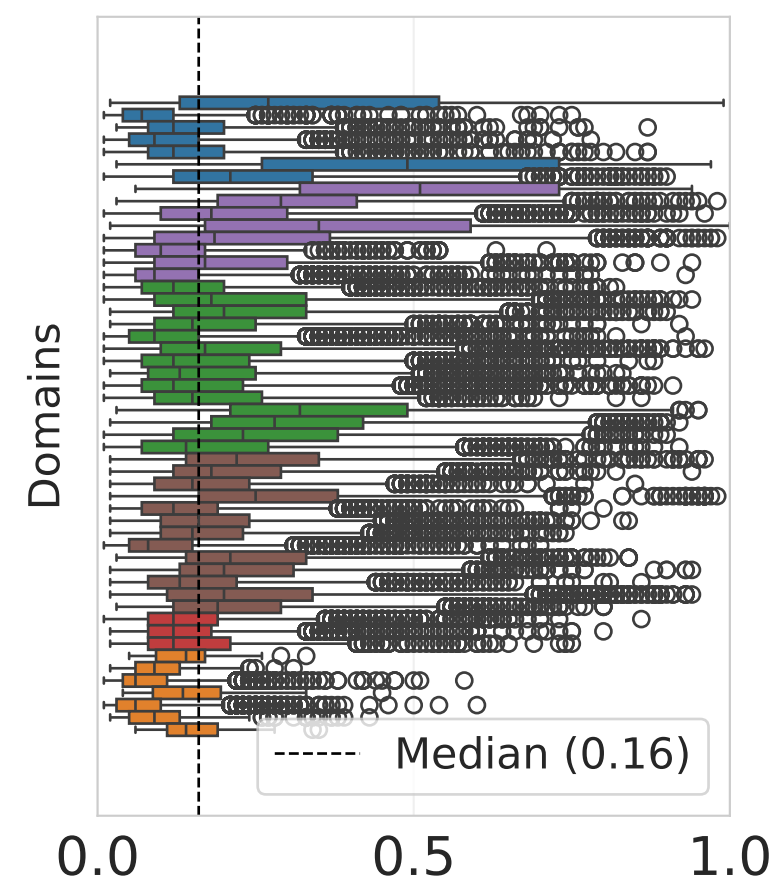

### TARGET TOKEN RANK

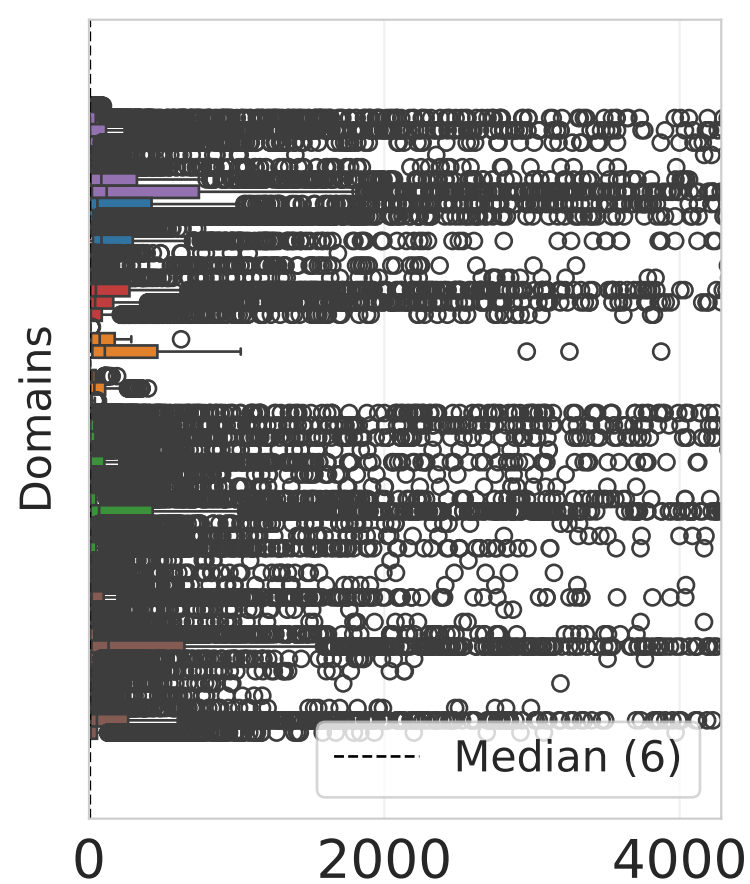

### TARGET TOKEN SOFTMAX DIFF

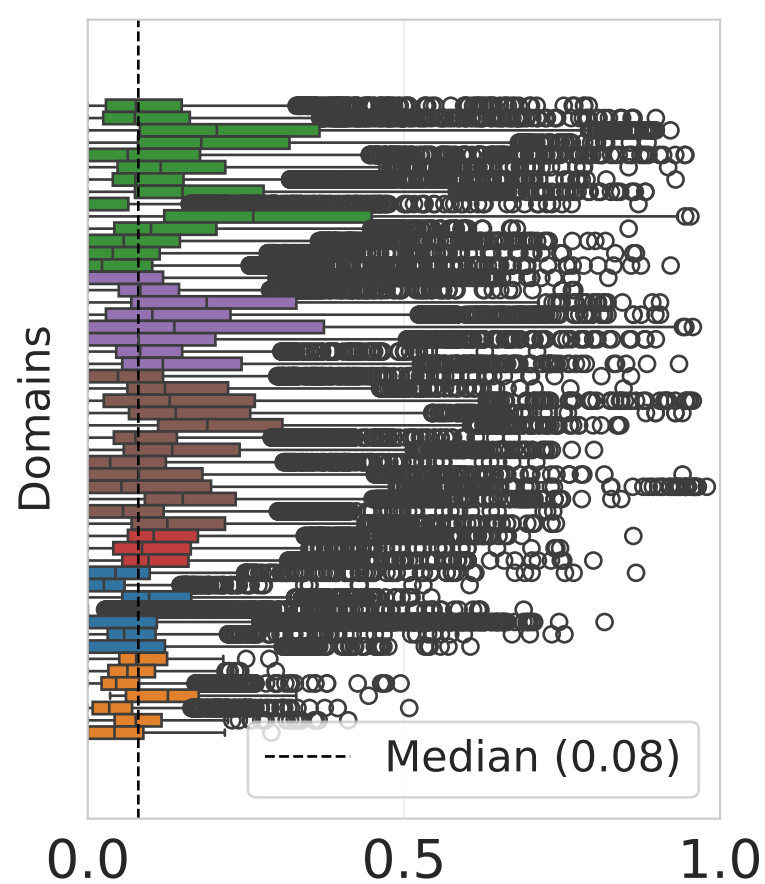

### PRECISION@1

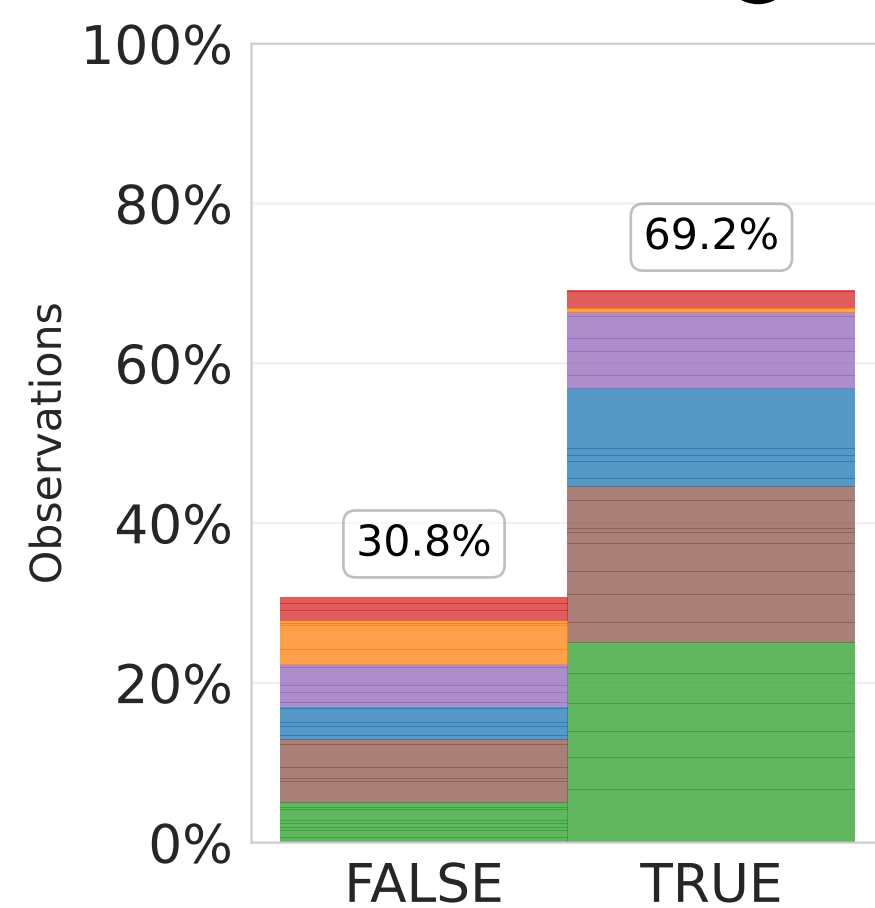

### PRECISION@5

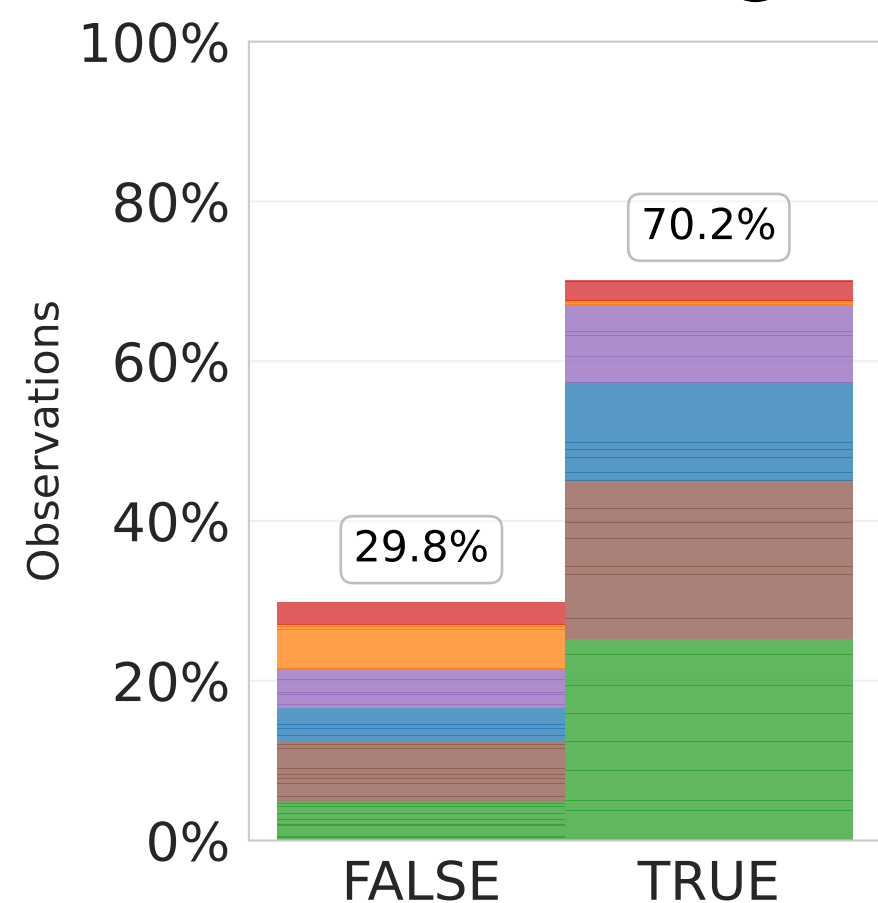

### TARGET VSA COSINE SIM

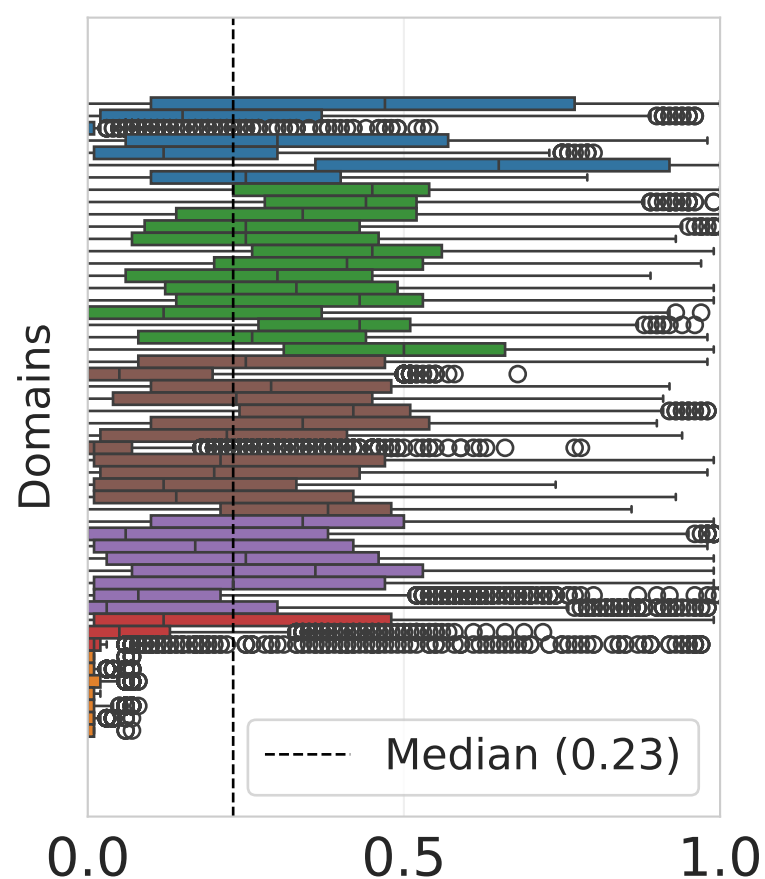

Morphological Modifiers (14)

Verbal & Grammatical Forms (13)

AREAS (52 domains)

Semantic Relations (8)

Factual Knowledge (7)

Mathematics (7)

Semantic Hierarchies (3)
