# Supplementary material
Source: ML conference proceedings conference paper supplement (https://openreview.net/forum?id=MSm0VFL9pq)

# NEXT TOKEN PRECISION@1

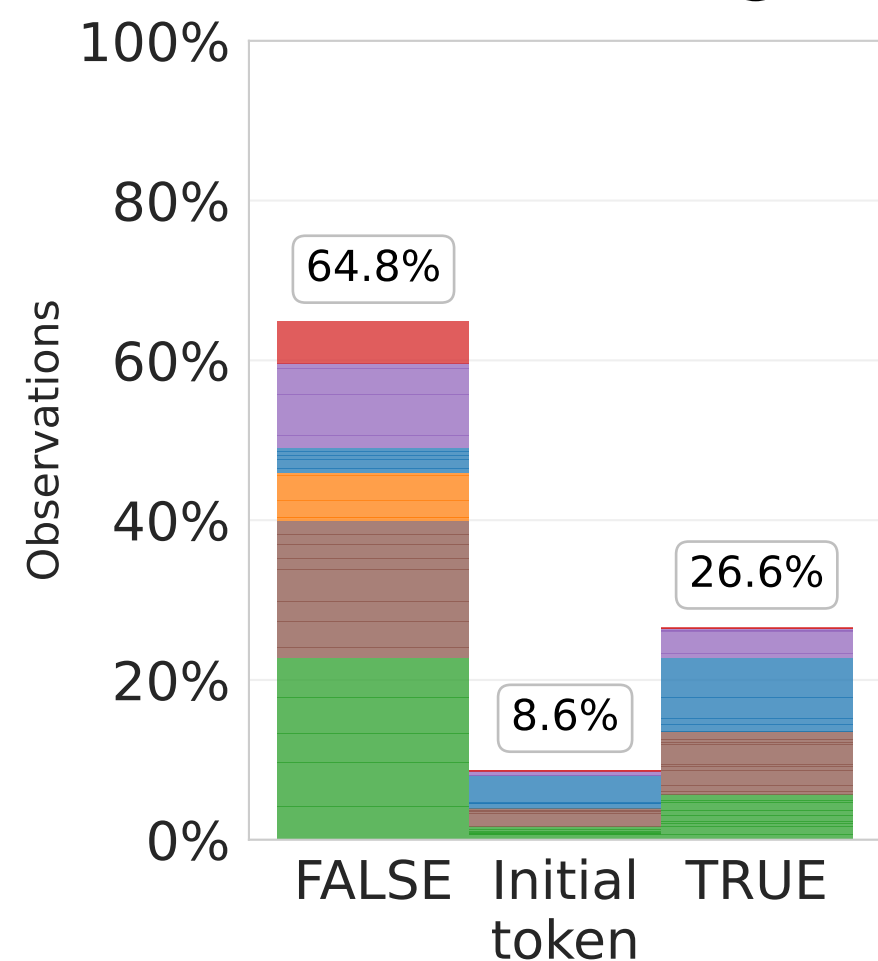

# NEXTTOKEN PRECISION@5

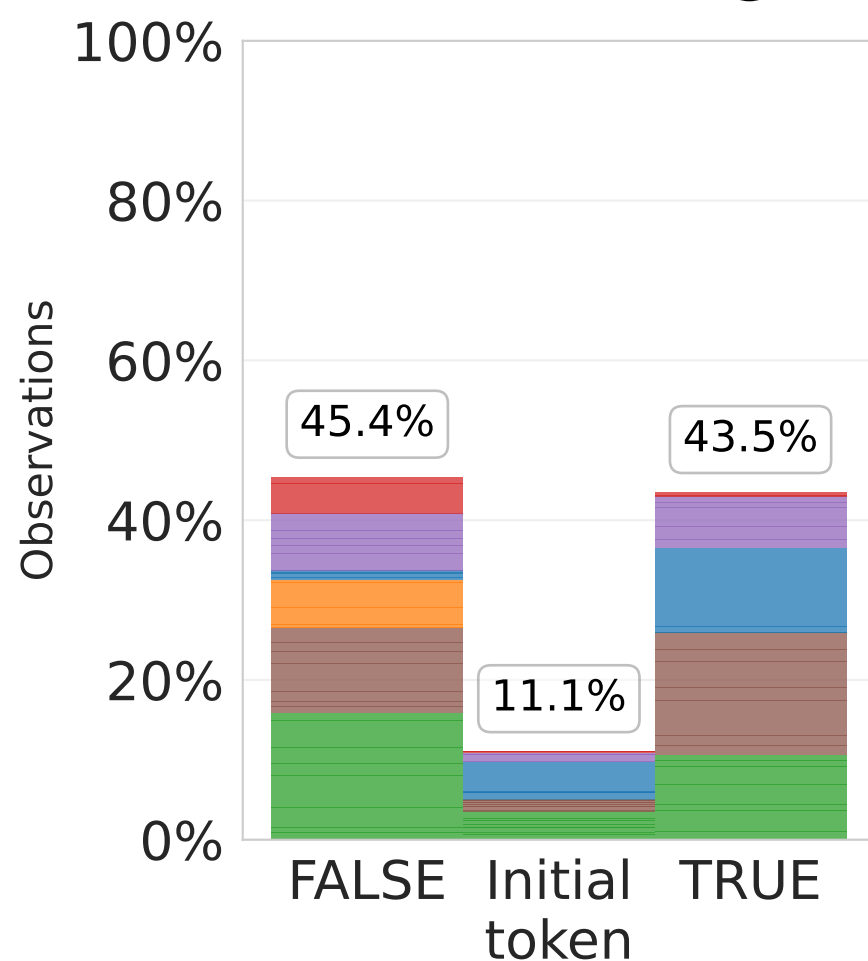

# NEXTTOKEN SOFTMAX

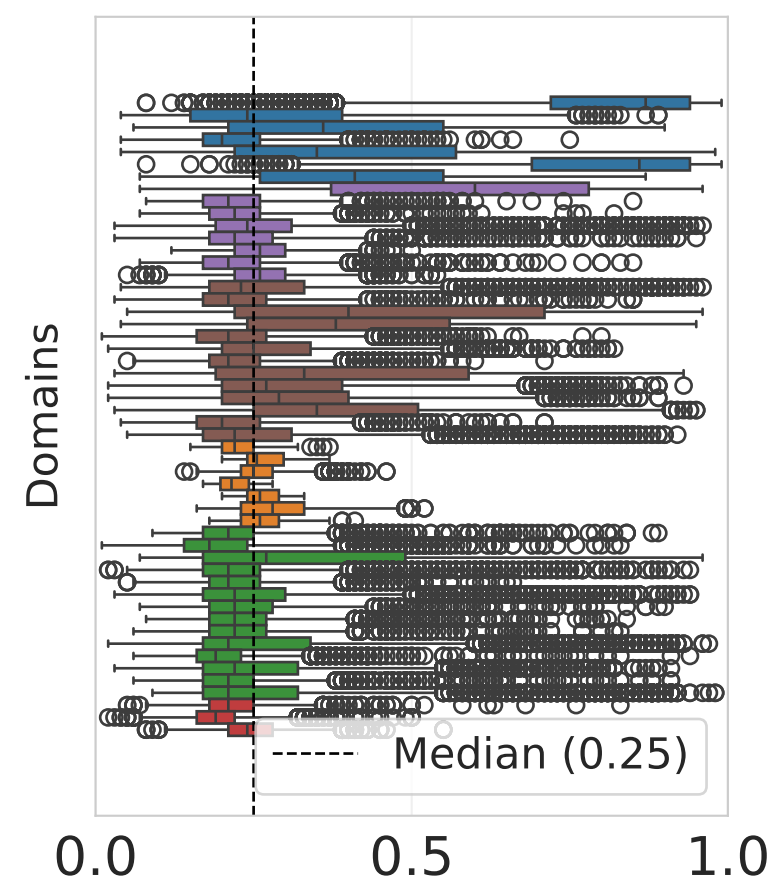

# TARGET TOKEN RANK

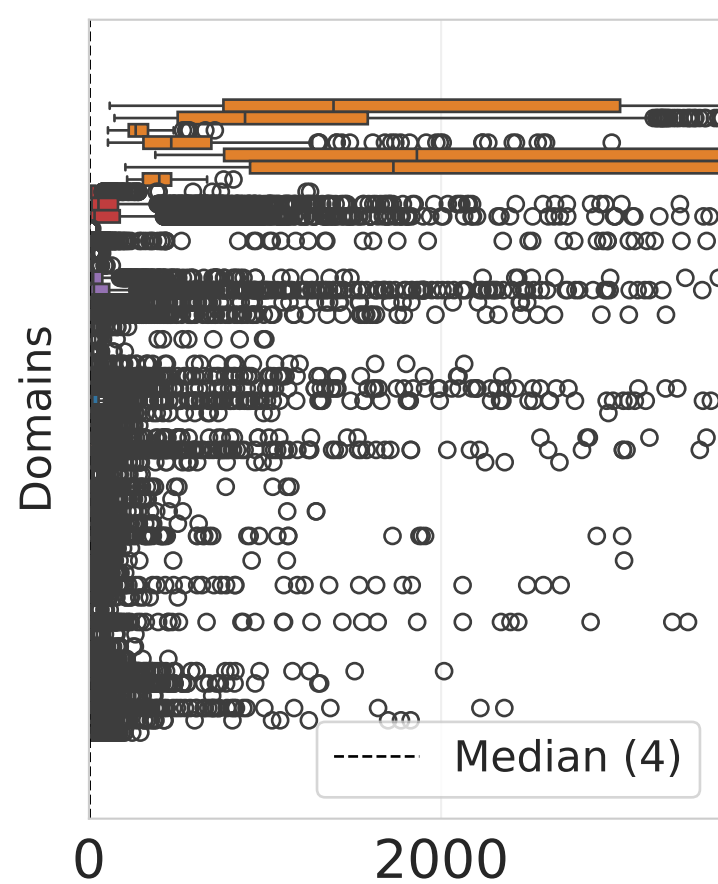

# TARGET TOKEN SOFTMAX DIFF

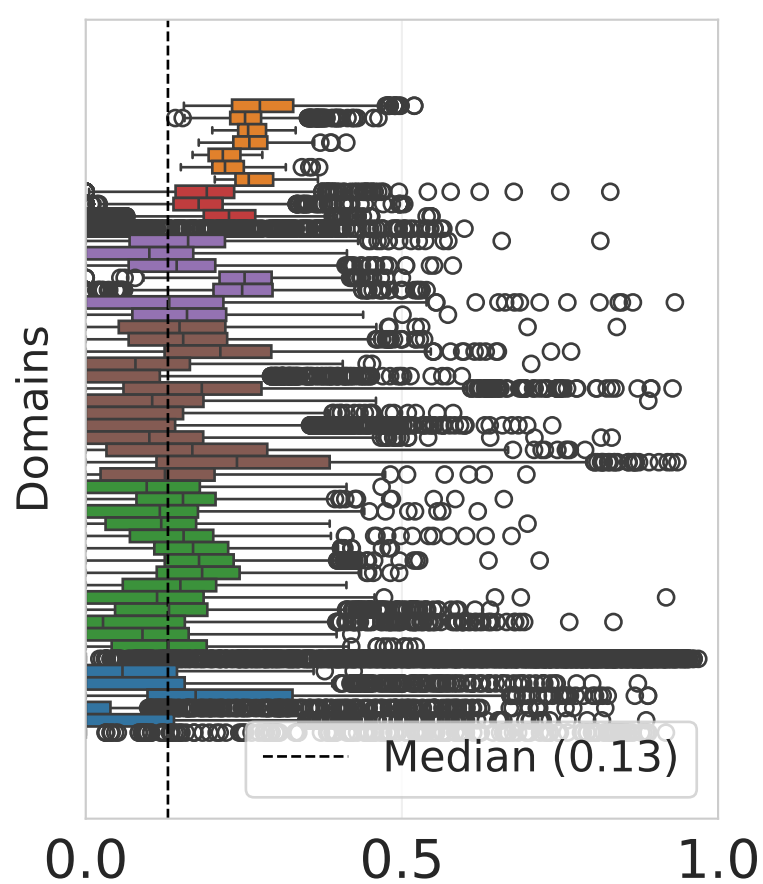

# PRECISION@1

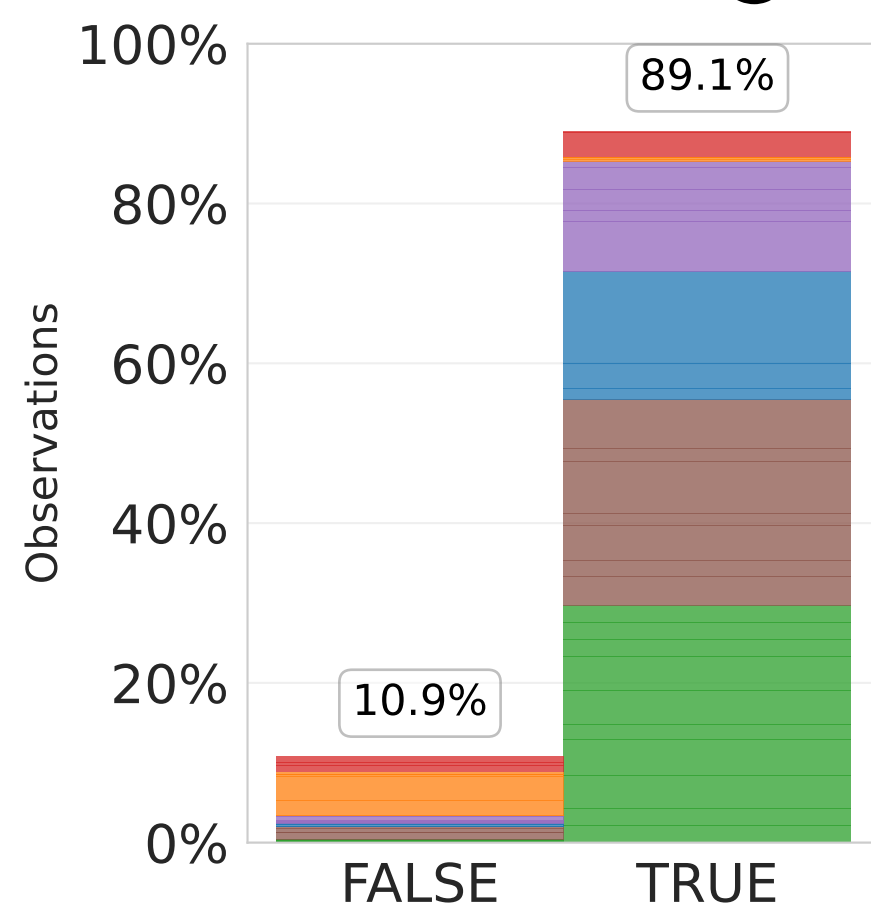

# PRECISION@5

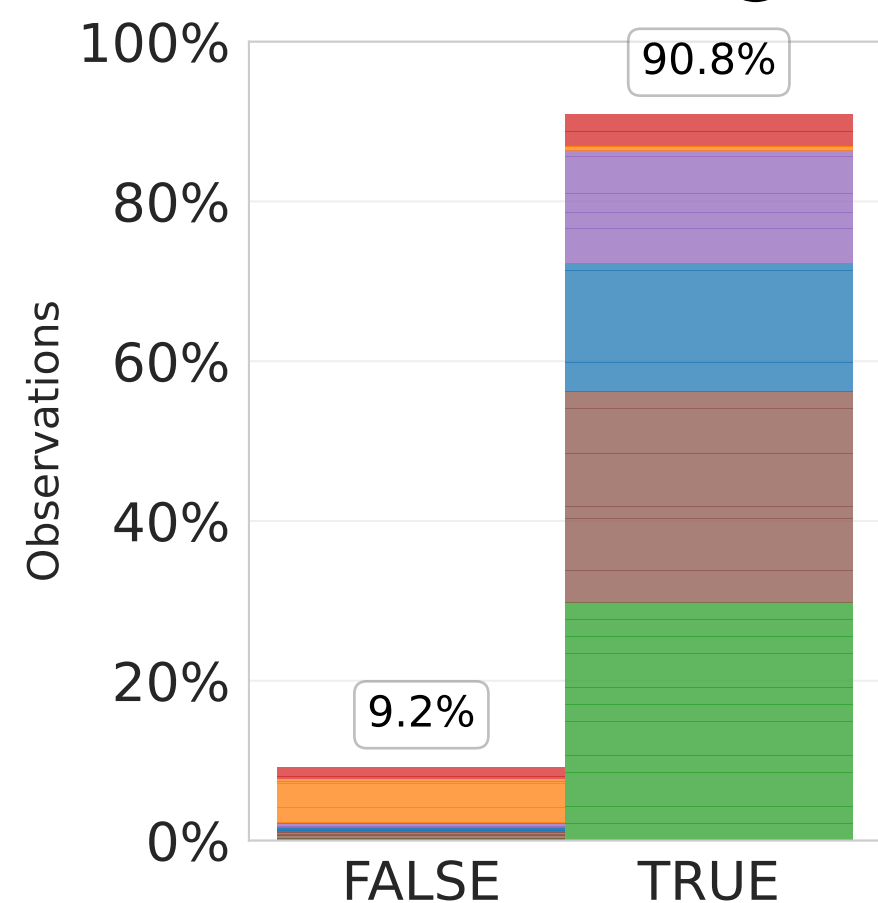

# TARGET VSA COSINE SIM

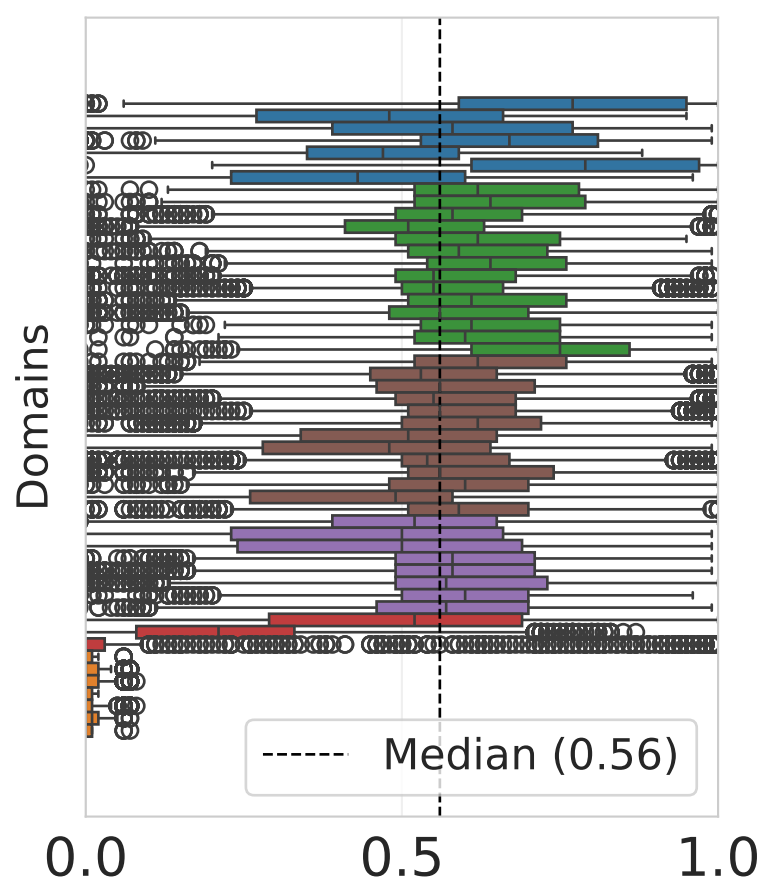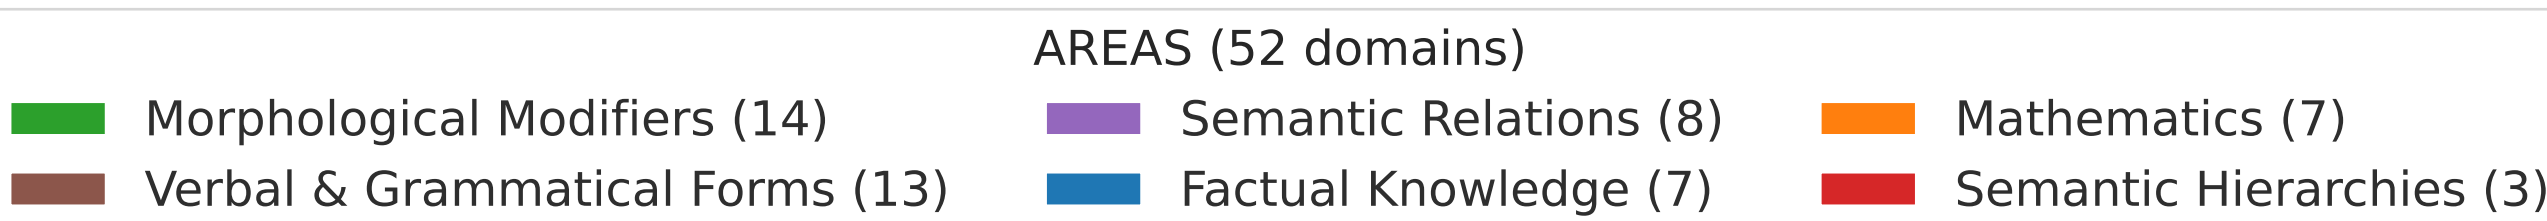

Supplement: supplementary_material [file Overview Llama3.1.pdf › code/outputs/Overview Llama3.1.pdf]
