# Supplementary material
Source: ML conference proceedings conference paper supplement (https://openreview.net/forum?id=MSm0VFL9pq)

### NEXT TOKEN PRECISION@1

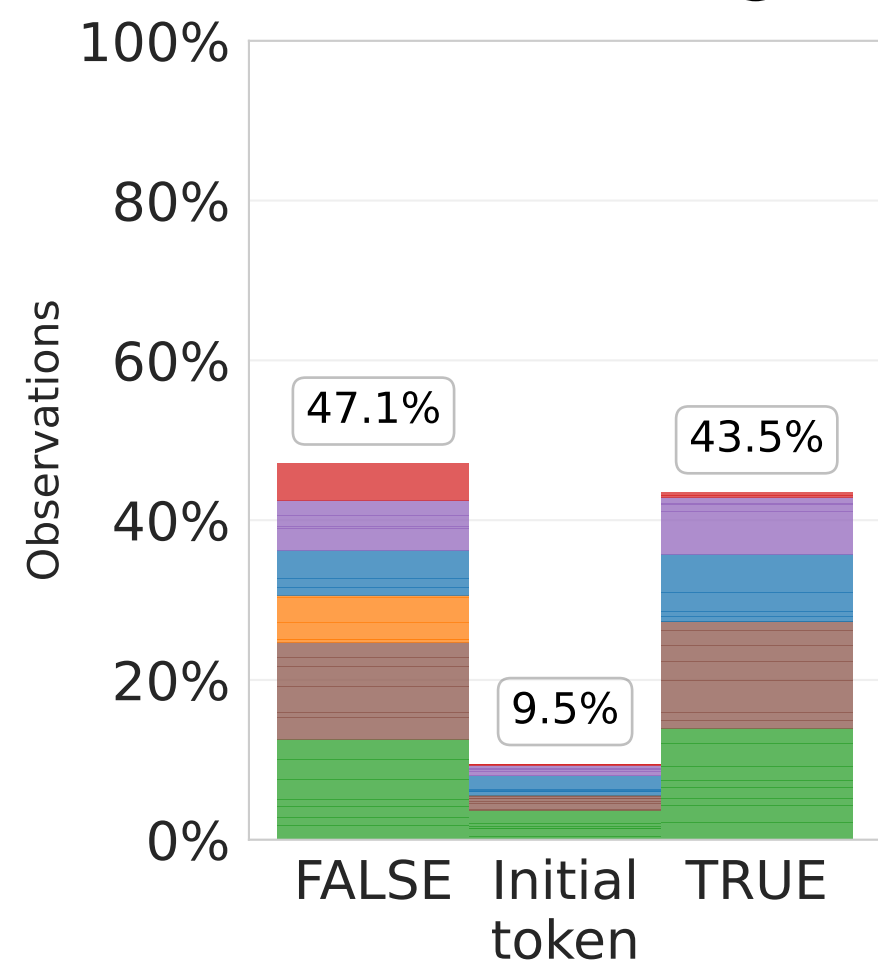

### NEXTTOKEN PRECISION@5

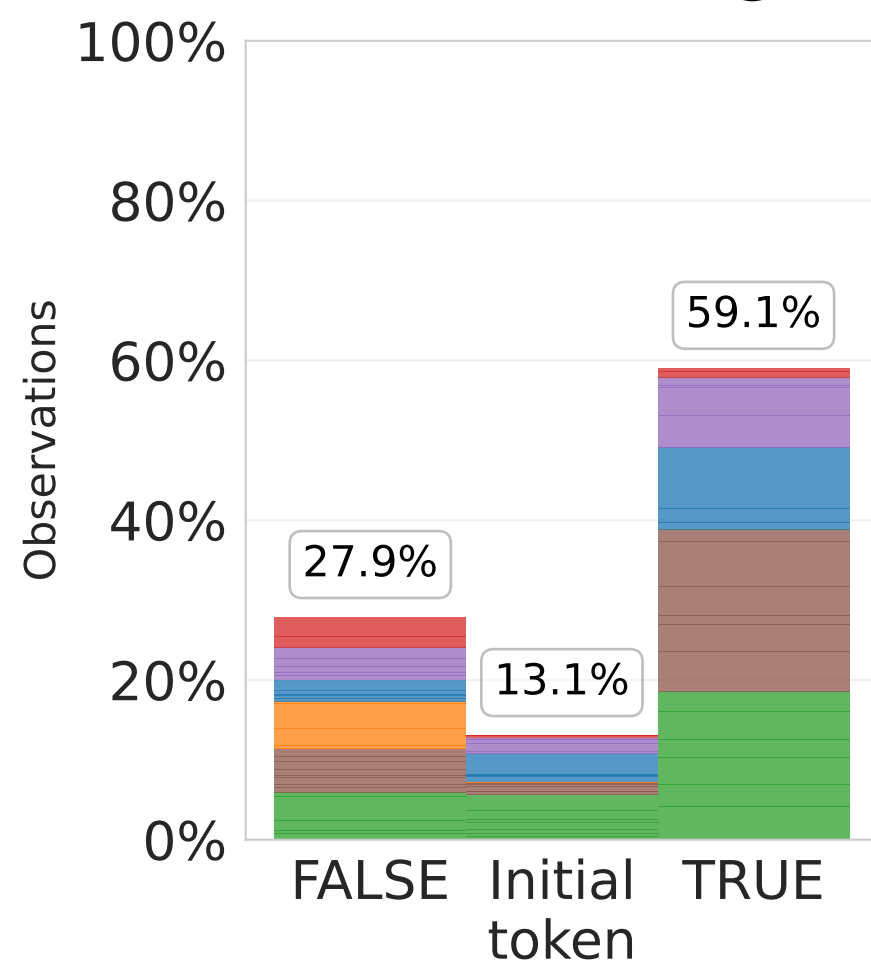

### NEXTTOKEN SOFTMAX

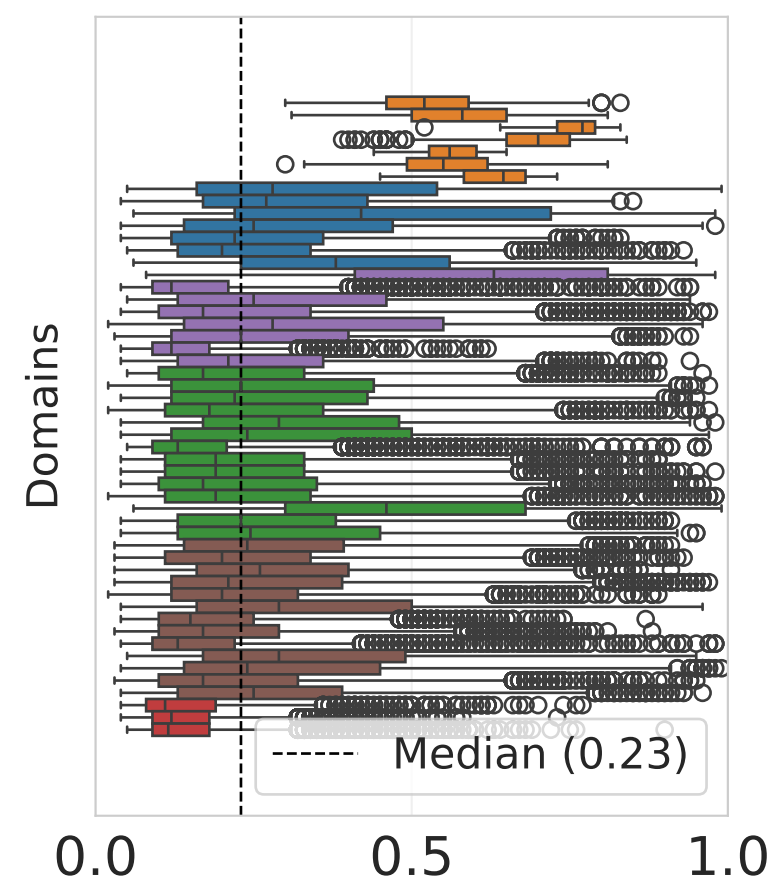

### TARGET TOKEN RANK

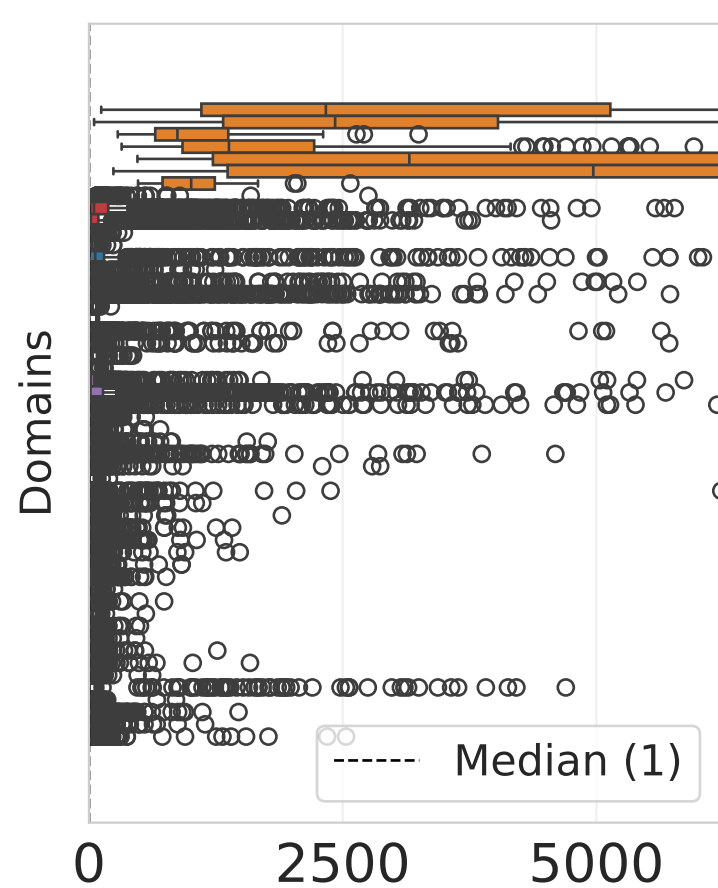

### TARGET TOKEN SOFTMAX DIFF

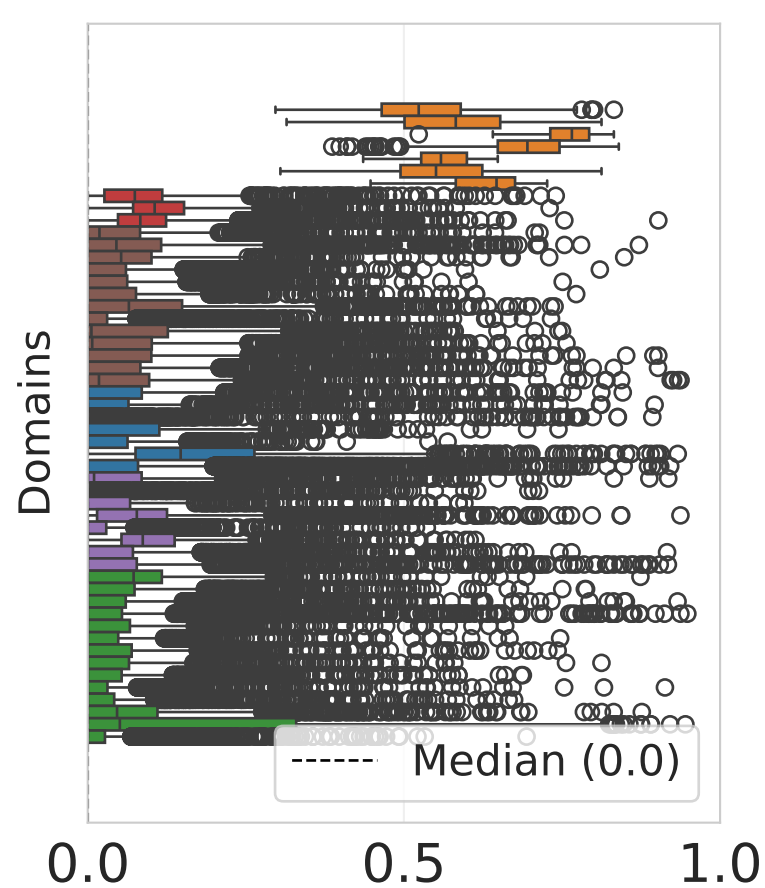

### PRECISION@1

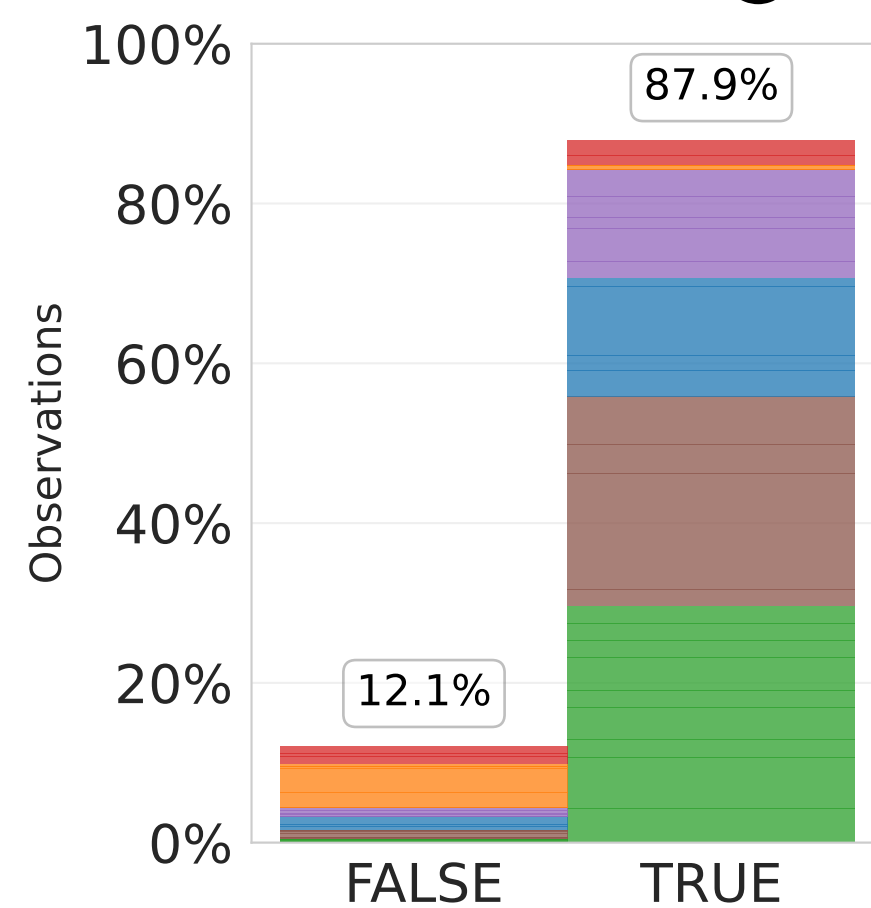

### PRECISION@5

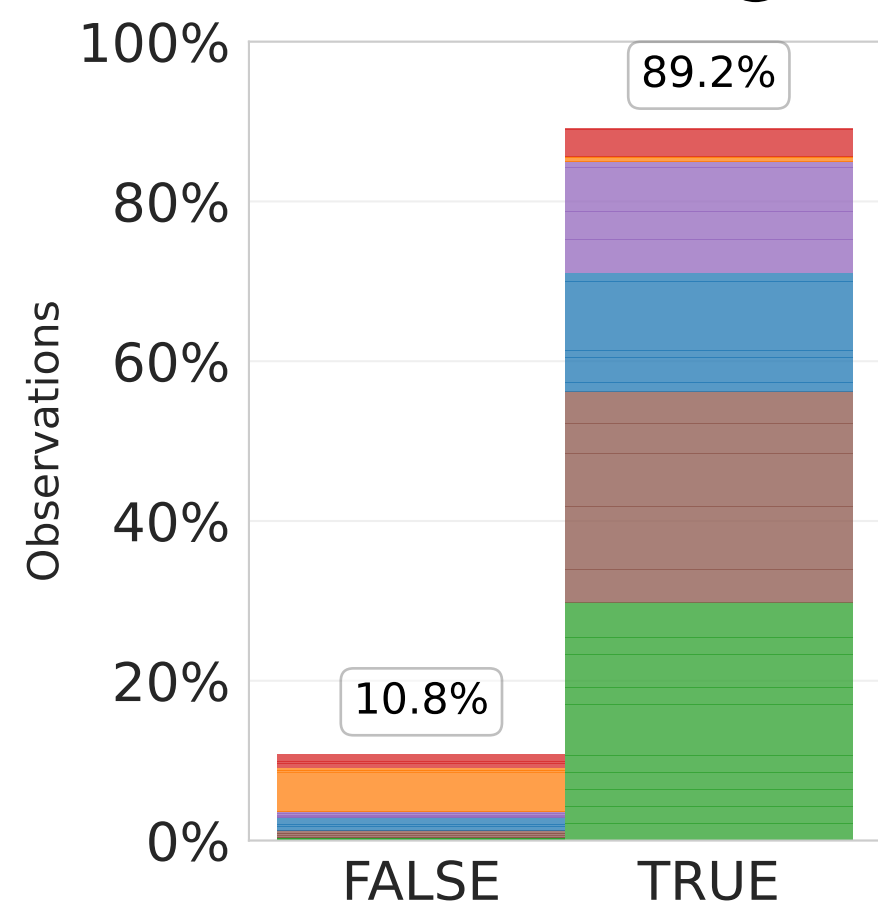

### TARGET VSA COSINE SIM

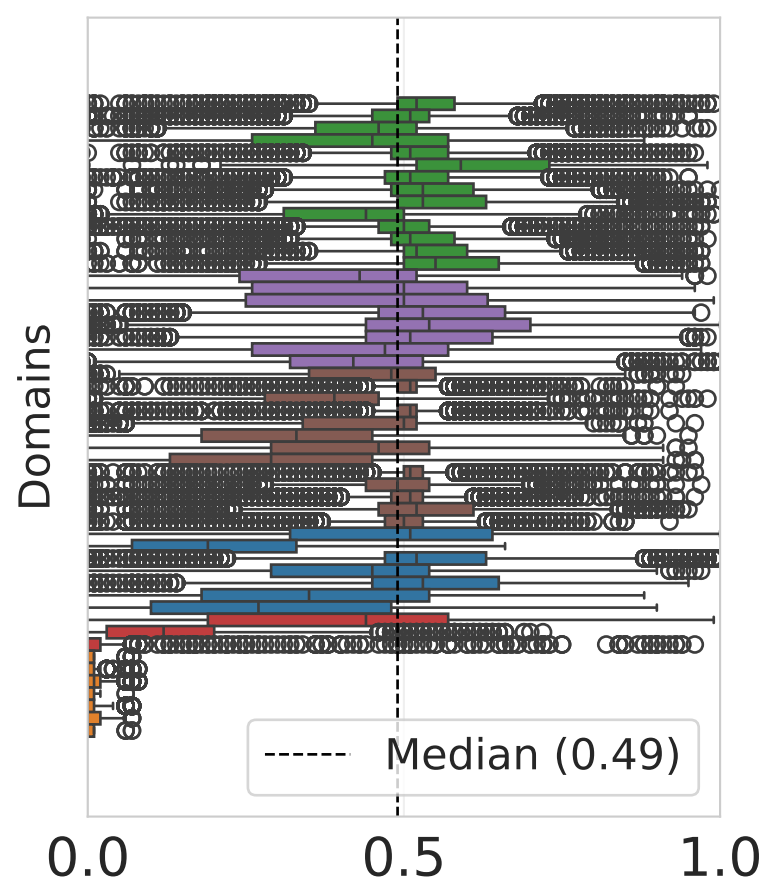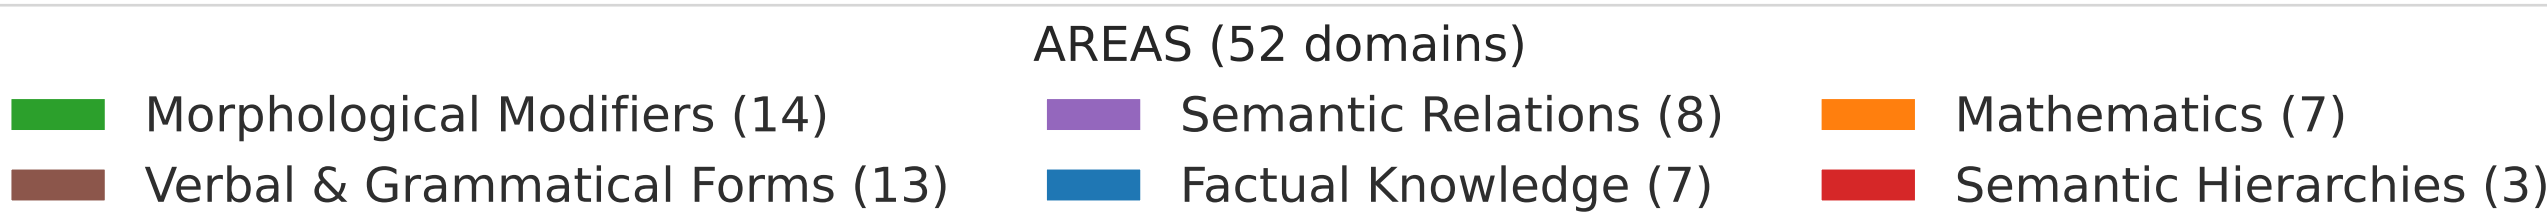

Supplement: supplementary_material [file Overview OLMo-2.pdf › code/outputs/Overview OLMo-2.pdf]
