# Supplementary material
Source: ML conference proceedings conference paper supplement (https://openreview.net/forum?id=MSm0VFL9pq)
Supplement: supplementary_material [file precision_stats.xlsx]

## Sheet: cleaned_example
	target_vsa_cosine_sim								next_token_precision@5								next_token_softmax								target_token_rank								target_token_softmax								target_token_softmax_diff								normalized_target_token_rank
	count	mean	std	min	25%	50%	75%	max	count	mean	std	min	25%	50%	75%	max	count	mean	std	min	25%	50%	75%	max	count	mean	std	min	25%	50%	75%	max	count	mean	std	min	25%	50%	75%	max	count	mean	std	min	25%	50%	75%	max	count
next_token_precision@1
0	1	-0.81		-0.81	-0.81	-0.81	-0.81	-0.81	1	1		1	1	1	1	1	1	0.08		0.08	0.08	0.08	0.08	0.08	1	1		1	1	1	1	1	1	0.05		0.05	0.05	0.05	0.05	0.05	1	0.02		0.02	0.02	0.02	0.02	0.02	1
[truncated: 7 more columns]

## Sheet: cleaned_example_key
	target_vsa_cosine_sim								next_token_precision@5								next_token_softmax								target_token_rank								target_token_softmax								target_token_softmax_diff								normalized_target_token_rank
	count	mean	std	min	25%	50%	75%	max	count	mean	std	min	25%	50%	75%	max	count	mean	std	min	25%	50%	75%	max	count	mean	std	min	25%	50%	75%	max	count	mean	std	min	25%	50%	75%	max	count	mean	std	min	25%	50%	75%	max	count
next_token_precision@1
0	82	0.06	0.02	0.05	0.05	0.06	0.06	0.18	82	0.12	0.31	0	0	0	0	1	82	0.15	0.1	0.05	0.08	0.12	0.16	0.57	82	72.49	129.94	1	13.25	23	63.75	629	82	0.02	0.02	0	0	0.01	0.01	0.13	82	0.13	0.1	0.01	0.07	0.1	0.14	0.55	82
0.5	2	0.06	0.01	0.05	0.05	0.06	0.06	0.06	2	0.75	0.35	0.5	0.62	0.75	0.88	1	2	0.17	0	0.17	0.17	0.17	0.17	0.17	2	7	7.07	2	4.5	7	9.5	12	2	0.05	0.06	0.01	0.03	0.05	0.08	0.1	2	0.12	0.06	0.08	0.1	0.12	0.14	0.16	2
1	2	0.06	0	0.06	0.06	0.06	0.06	0.06	2	1	0	1	1	1	1	1	2	0.22	0.01	0.21	0.21	0.22	0.22	0.22	2	0	0	0	0	0	0	0	2	0.22	0.01	0.21	0.21	0.22	0.22	0.22	2	0	0	0	0	0	0	0	2
[truncated: 7 more columns]

## Sheet: cleaned_example_value
	target_vsa_cosine_sim								next_token_precision@5								next_token_softmax								target_token_rank								target_token_softmax								target_token_softmax_diff								normalized_target_token_rank
	count	mean	std	min	25%	50%	75%	max	count	mean	std	min	25%	50%	75%	max	count	mean	std	min	25%	50%	75%	max	count	mean	std	min	25%	50%	75%	max	count	mean	std	min	25%	50%	75%	max	count	mean	std	min	25%	50%	75%	max	count
next_token_precision@1
0	107	0.07	0.03	0.05	0.06	0.06	0.06	0.23	107	0.42	0.48	0	0	0	1	1	107	0.19	0.1	0.05	0.11	0.18	0.25	0.59	107	147.58	654.01	1	2	8	51	5640	107	0.03	0.03	0	0	0.02	0.04	0.14	107	0.17	0.11	0	0.09	0.15	0.21	0.55	107
1	15	0.07	0.06	0.05	0.06	0.06	0.06	0.28	15	1	0	1	1	1	1	1	15	0.32	0.28	0.09	0.14	0.16	0.48	0.82	15	0	0	0	0	0	0	0	15	0.32	0.28	0.09	0.14	0.16	0.49	0.82	15	0	0	0	0	0	0	0	15
0.5	4	0.06	0	0.05	0.06	0.06	0.06	0.06	4	0.75	0.29	0.5	0.5	0.75	1	1	4	0.15	0.03	0.11	0.12	0.15	0.16	0.18	4	4.5	5.2	0	2.25	3	5.25	12	4	0.06	0.07	0.01	0.02	0.03	0.07	0.16	4	0.09	0.06	0	0.07	0.1	0.11	0.15	4
[truncated: 7 more columns]

## Sheet: cleaned_key
	target_vsa_cosine_sim								next_token_precision@5								next_token_softmax								target_token_rank								target_token_softmax								target_token_softmax_diff								normalized_target_token_rank
	count	mean	std	min	25%	50%	75%	max	count	mean	std	min	25%	50%	75%	max	count	mean	std	min	25%	50%	75%	max	count	mean	std	min	25%	50%	75%	max	count	mean	std	min	25%	50%	75%	max	count	mean	std	min	25%	50%	75%	max	count
next_token_precision@1
0	12	0.06	0	0.05	0.06	0.06	0.06	0.06	12	0.25	0.45	0	0	0	0.25	1	12	0.14	0.08	0.07	0.09	0.1	0.15	0.36	12	138.08	222.29	1	4.25	33	161.5	741	12	0.03	0.04	0	0	0.01	0.03	0.12	12	0.11	0.07	0.02	0.07	0.09	0.13	0.24	12
0.5	1	0.06		0.06	0.06	0.06	0.06	0.06	1	0.5		0.5	0.5	0.5	0.5	0.5	1	0.19		0.19	0.19	0.19	0.19	0.19	1	451		451	451	451	451	451	1	0		0	0	0	0	0	1	0.19		0.19	0.19	0.19	0.19	0.19	1
[truncated: 7 more columns]

## Sheet: cleaned_original
	target_vsa_cosine_sim								next_token_precision@5								next_token_softmax								target_token_rank								target_token_softmax								target_token_softmax_diff								normalized_target_token_rank
	count	mean	std	min	25%	50%	75%	max	count	mean	std	min	25%	50%	75%	max	count	mean	std	min	25%	50%	75%	max	count	mean	std	min	25%	50%	75%	max	count	mean	std	min	25%	50%	75%	max	count	mean	std	min	25%	50%	75%	max	count
next_token_precision@1
1	10	-0.64	0.11	-0.84	-0.68	-0.66	-0.62	-0.43	10	1	0	1	1	1	1	1	10	0.21	0.1	0.05	0.17	0.2	0.21	0.43	10	0	0	0	0	0	0	0	10	0.21	0.1	0.05	0.17	0.19	0.21	0.43	10	0	0	0	0	0	0	0	10
0	30	-0.72	0.17	-0.87	-0.83	-0.79	-0.73	-0.35	30	0.4	0.5	0	0	0	1	1	30	0.21	0.11	0.04	0.12	0.2	0.27	0.44	30	6.5	4.59	1	3	5	8.75	19	30	0.04	0.04	0.01	0.02	0.03	0.04	0.18	30	0.17	0.11	0.02	0.08	0.16	0.22	0.42	30
[truncated: 7 more columns]

## Sheet: context
	target_vsa_cosine_sim								next_token_precision@5								next_token_softmax								target_token_rank								target_token_softmax								target_token_softmax_diff								normalized_target_token_rank
	count	mean	std	min	25%	50%	75%	max	count	mean	std	min	25%	50%	75%	max	count	mean	std	min	25%	50%	75%	max	count	mean	std	min	25%	50%	75%	max	count	mean	std	min	25%	50%	75%	max	count	mean	std	min	25%	50%	75%	max	count
next_token_precision@1
0.5	519	0.49	0.06	0.06	0.5	0.5	0.51	0.54	519	0.65	0.23	0.5	0.5	0.5	1	1	519	0.28	0.17	0.05	0.15	0.23	0.37	0.88	519	23.31	135.17	0	0	0	2	1942	519	0.2	0.18	0	0.06	0.15	0.28	0.88	519	0.08	0.14	0	0	0	0.12	0.84	519
1	2755	0.49	0.06	0.05	0.5	0.51	0.51	0.54	2755	1	0	1	1	1	1	1	2755	0.4	0.23	0.05	0.21	0.35	0.56	0.99	2755	0	0.03	0	0	0	0	1	2755	0.4	0.23	0.05	0.21	0.35	0.56	0.99	2755	0	0	0	0	0	0	0	2755
0	1907	0.47	0.1	0.05	0.49	0.5	0.51	0.54	1907	0.5	0.46	0	0	0.5	1	1	1907	0.18	0.14	0.02	0.09	0.13	0.22	0.86	1907	38.8	428.85	0	1	4	15	17563	1907	0.05	0.06	0	0.01	0.03	0.07	0.44	1907	0.13	0.14	0	0.05	0.09	0.15	0.83	1907
[truncated: 7 more columns]

## Sheet: example
	target_vsa_cosine_sim								next_token_precision@5								next_token_softmax								target_token_rank								target_token_softmax								target_token_softmax_diff								normalized_target_token_rank
	count	mean	std	min	25%	50%	75%	max	count	mean	std	min	25%	50%	75%	max	count	mean	std	min	25%	50%	75%	max	count	mean	std	min	25%	50%	75%	max	count	mean	std	min	25%	50%	75%	max	count	mean	std	min	25%	50%	75%	max	count
next_token_precision@1
1	5	0.5	0.01	0.49	0.49	0.5	0.5	0.52	5	1	0	1	1	1	1	1	5	0.16	0.03	0.11	0.16	0.16	0.18	0.2	5	0	0	0	0	0	0	0	5	0.17	0.03	0.11	0.16	0.16	0.18	0.2	5	0	0	0	0	0	0	0	5
0	17	0.31	0.22	0.05	0.06	0.42	0.5	0.51	17	0.41	0.51	0	0	0	1	1	17	0.17	0.17	0.06	0.09	0.1	0.13	0.64	17	293	1031.31	1	3	14	40	4279	17	0.03	0.03	0	0	0.01	0.05	0.09	17	0.14	0.19	0.01	0.04	0.06	0.12	0.64	17
[truncated: 7 more columns]

## Sheet: example_key
	target_vsa_cosine_sim								next_token_precision@5								next_token_softmax								target_token_rank								target_token_softmax								target_token_softmax_diff								normalized_target_token_rank
	count	mean	std	min	25%	50%	75%	max	count	mean	std	min	25%	50%	75%	max	count	mean	std	min	25%	50%	75%	max	count	mean	std	min	25%	50%	75%	max	count	mean	std	min	25%	50%	75%	max	count	mean	std	min	25%	50%	75%	max	count
next_token_precision@1
1	560	0.03	0.08	-0.04	-0.01	0	0.02	0.51	560	1	0	1	1	1	1	1	560	0.39	0.28	0.05	0.18	0.29	0.54	0.98	560	0	0.04	0	0	0	0	1	560	0.39	0.28	0.05	0.18	0.29	0.54	0.98	560	0	0	0	0	0	0	0	560
0	1781	0.02	0.07	-0.1	-0.01	0	0.02	0.5	1781	0.2	0.37	0	0	0	0	1	1781	0.16	0.11	0.03	0.09	0.13	0.2	0.84	1781	393.52	2983.3	1	6	28	126	68282	1781	0.02	0.04	0	0	0.01	0.03	0.31	1781	0.14	0.11	0	0.07	0.11	0.17	0.84	1781
0.5	100	0.02	0.06	-0.03	-0.01	0	0.02	0.33	100	0.52	0.09	0.5	0.5	0.5	0.5	1	100	0.27	0.16	0.06	0.14	0.22	0.37	0.79	100	14.6	51.59	0	0	0	0	348	100	0.23	0.19	0	0.09	0.18	0.34	0.79	100	0.04	0.09	0	0	0	0	0.39	100
[truncated: 7 more columns]

## Sheet: example_key&key
	target_vsa_cosine_sim								next_token_precision@5								next_token_softmax								target_token_rank								target_token_softmax								target_token_softmax_diff								normalized_target_token_rank
	count	mean	std	min	25%	50%	75%	max	count	mean	std	min	25%	50%	75%	max	count	mean	std	min	25%	50%	75%	max	count	mean	std	min	25%	50%	75%	max	count	mean	std	min	25%	50%	75%	max	count	mean	std	min	25%	50%	75%	max	count
next_token_precision@1
0	3	0.05	0	0.05	0.05	0.05	0.05	0.05	3	0	0	0	0	0	0	0	3	0.08	0.01	0.07	0.08	0.08	0.08	0.09	3	129.33	189.44	15	20	25	186.5	348	3	0.01	0.01	0	0	0.01	0.01	0.02	3	0.07	0.02	0.06	0.06	0.07	0.08	0.09	3
1	2	0.05	0	0.05	0.05	0.05	0.05	0.05	2	1	0	1	1	1	1	1	2	0.87	0	0.87	0.87	0.87	0.87	0.87	2	0	0	0	0	0	0	0	2	0.87	0	0.87	0.87	0.87	0.87	0.87	2	0	0	0	0	0	0	0	2
[truncated: 7 more columns]

## Sheet: example_value
	target_vsa_cosine_sim								next_token_precision@5								next_token_softmax								target_token_rank								target_token_softmax								target_token_softmax_diff								normalized_target_token_rank
	count	mean	std	min	25%	50%	75%	max	count	mean	std	min	25%	50%	75%	max	count	mean	std	min	25%	50%	75%	max	count	mean	std	min	25%	50%	75%	max	count	mean	std	min	25%	50%	75%	max	count	mean	std	min	25%	50%	75%	max	count
next_token_precision@1
0.5	12	0.07	0.27	-0.31	-0.08	0.01	0.16	0.72	12	0.58	0.19	0.5	0.5	0.5	0.5	1	12	0.19	0.12	0.06	0.1	0.2	0.21	0.46	12	33	95.14	0	0	0	3.75	331	12	0.14	0.15	0	0.04	0.09	0.21	0.46	12	0.05	0.08	0	0	0	0.08	0.21	12
0	365	-0.03	0.36	-0.9	-0.09	0.01	0.13	0.77	365	0.35	0.46	0	0	0	1	1	365	0.19	0.12	0.04	0.1	0.14	0.24	0.77	365	98.91	429.86	1	3	8	35	6367	365	0.03	0.04	0	0	0.02	0.04	0.26	365	0.16	0.13	0	0.07	0.12	0.21	0.77	365
1	66	-0.06	0.26	-0.83	-0.17	-0.07	0.01	0.86	66	1	0	1	1	1	1	1	66	0.28	0.2	0.06	0.15	0.21	0.36	0.91	66	0.02	0.12	0	0	0	0	1	66	0.28	0.2	0.06	0.15	0.21	0.36	0.91	66	0	0	0	0	0	0	0	66
[truncated: 7 more columns]

[truncated: 4 more sheets: example_value&key, greedy, key, original]
