# Supplementary material
Source: ML conference proceedings conference paper supplement (https://openreview.net/forum?id=MSm0VFL9pq)
Supplement: supplementary_material [file WRONG.pdf › code/outputs/OLMo-2/stats/graphs/WRONG.pdf]

# NEXT TOKEN PRECISION@1

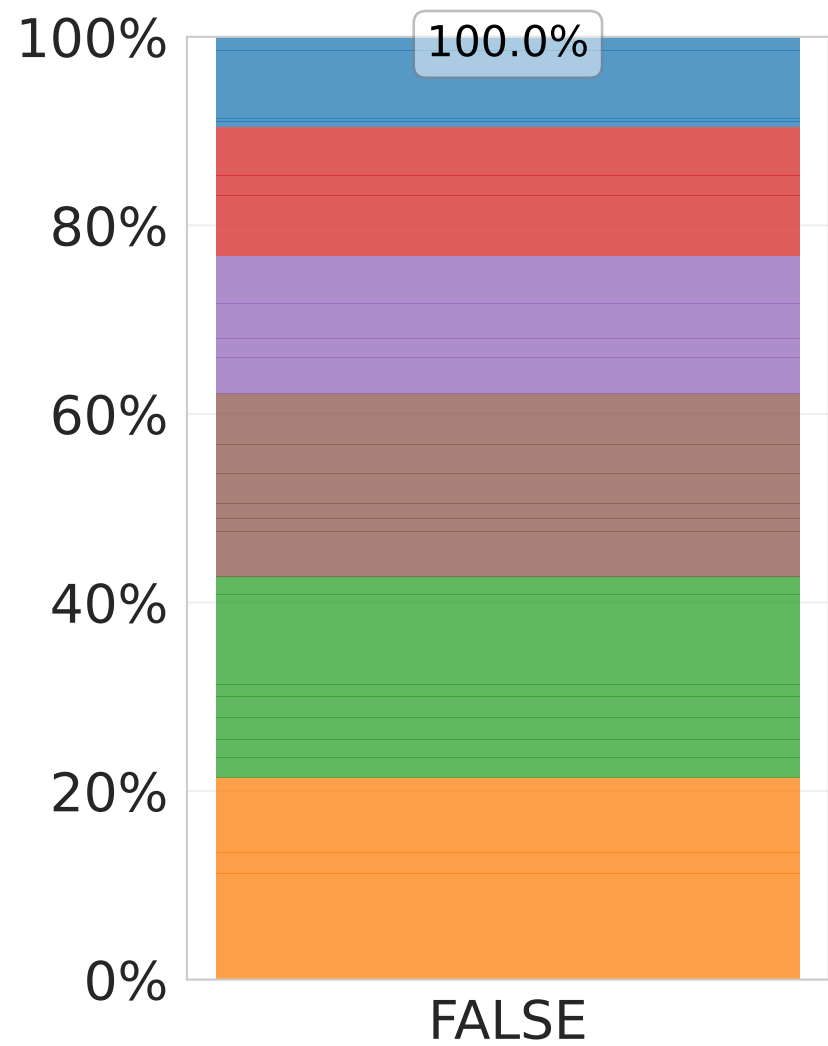

# NEXT TOKEN PRECISION@5

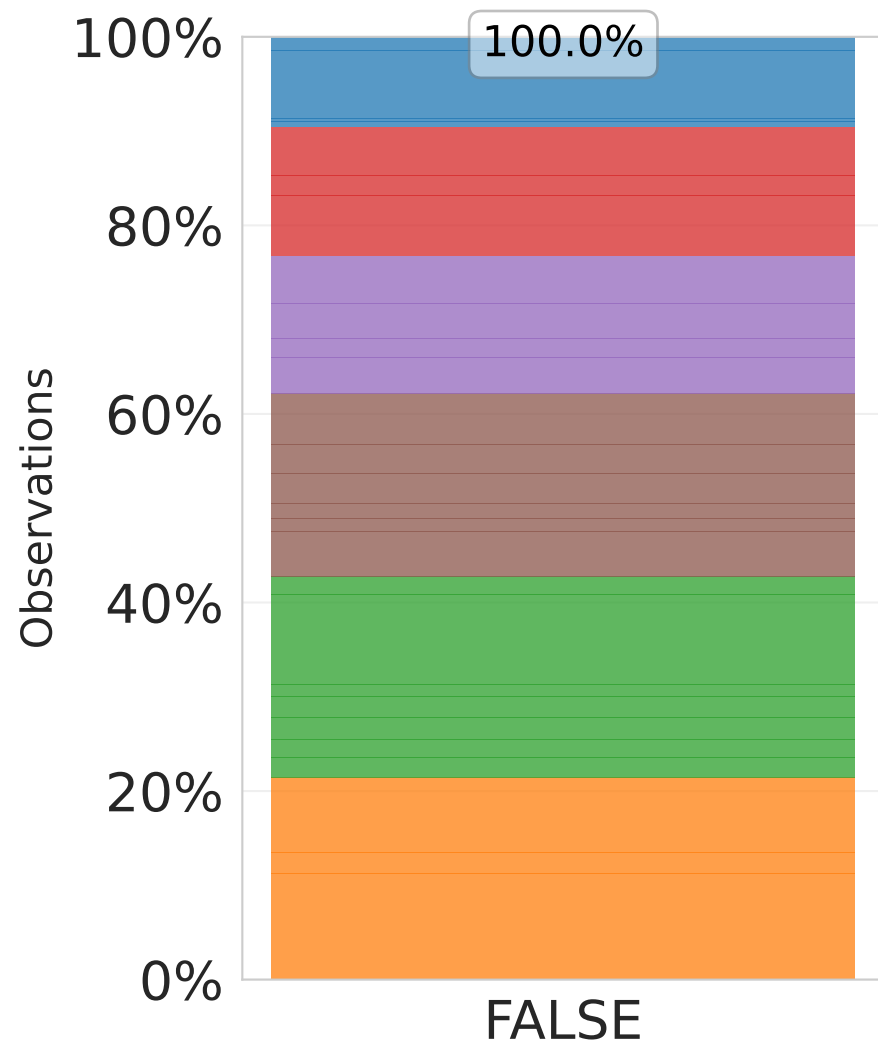

# NEXT TOKEN SOFTMAX

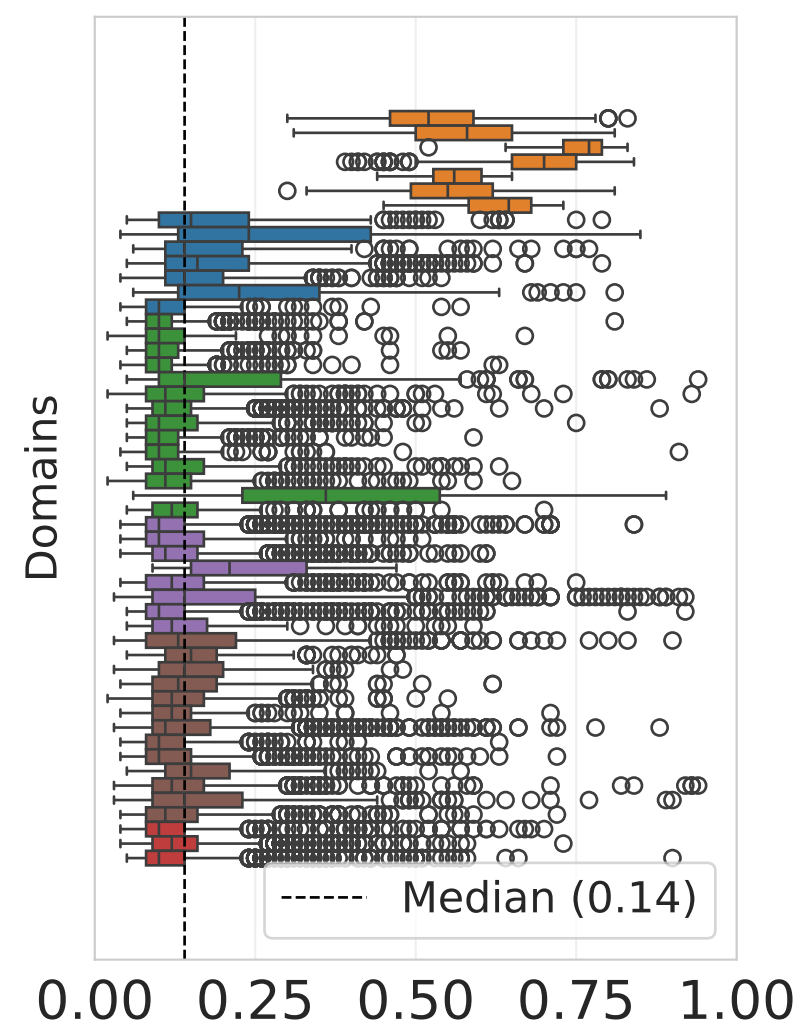

# TARGET TOKEN RANK

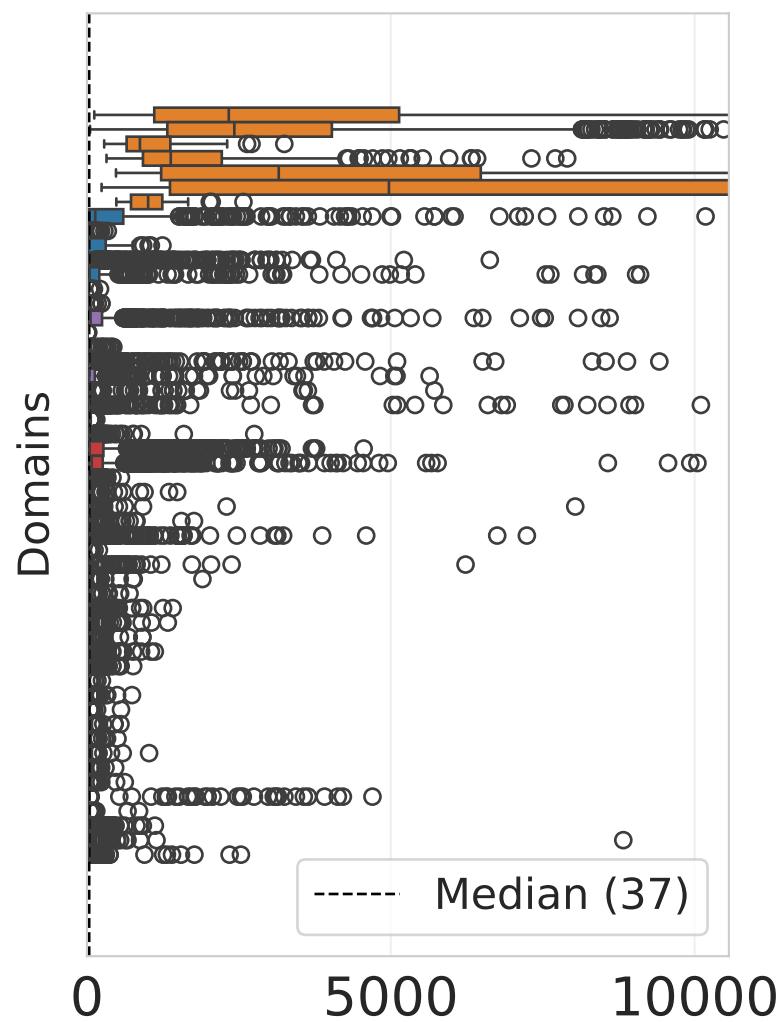

# TARGET TOKEN SOFTMAX DIFF

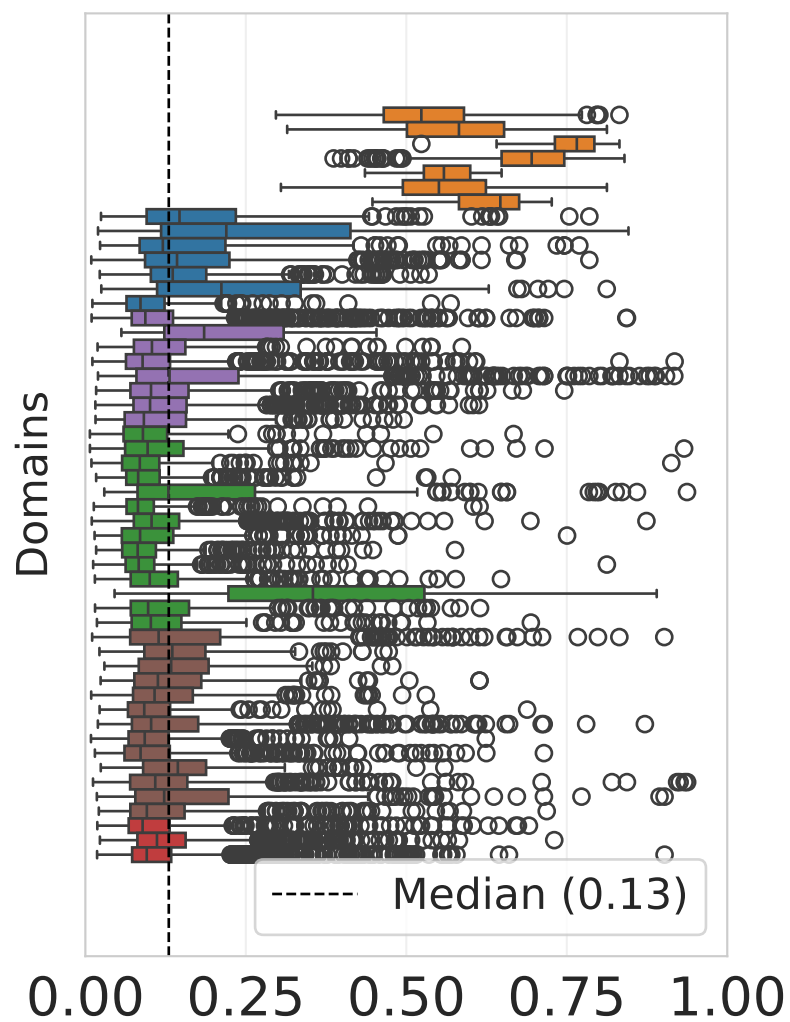

# PRECISION@1

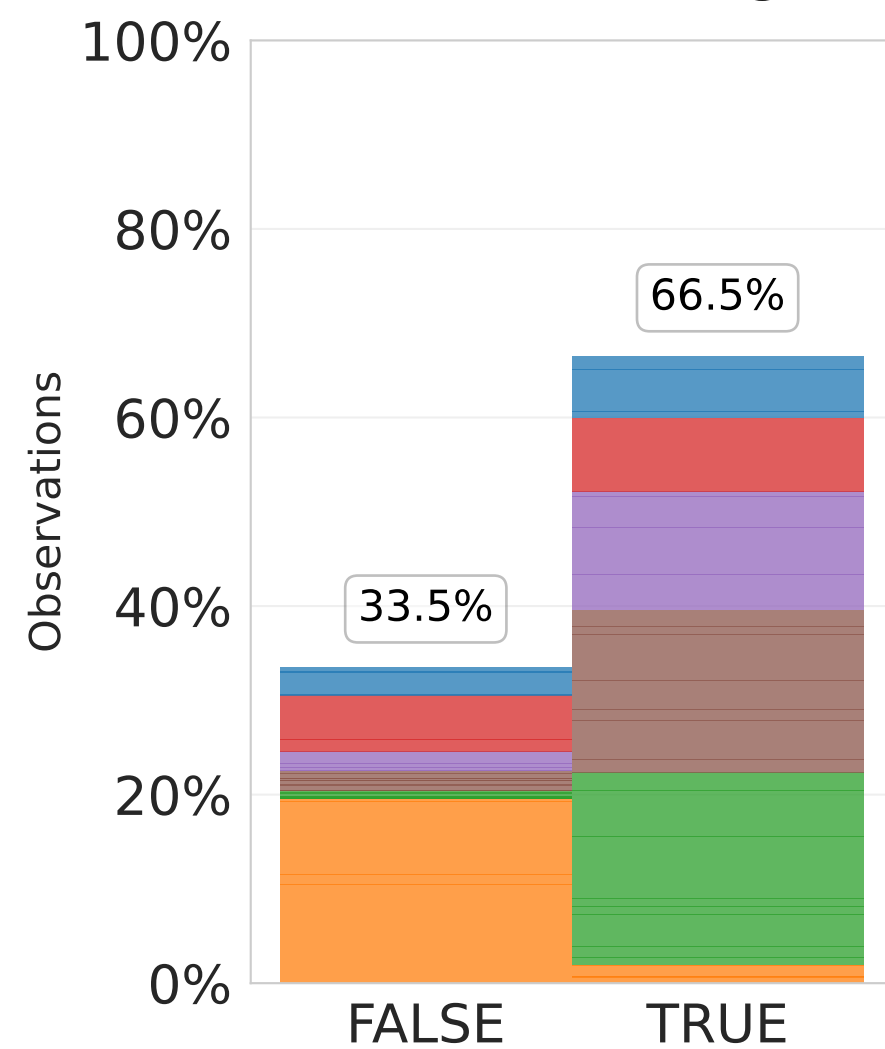

# PRECISION@5

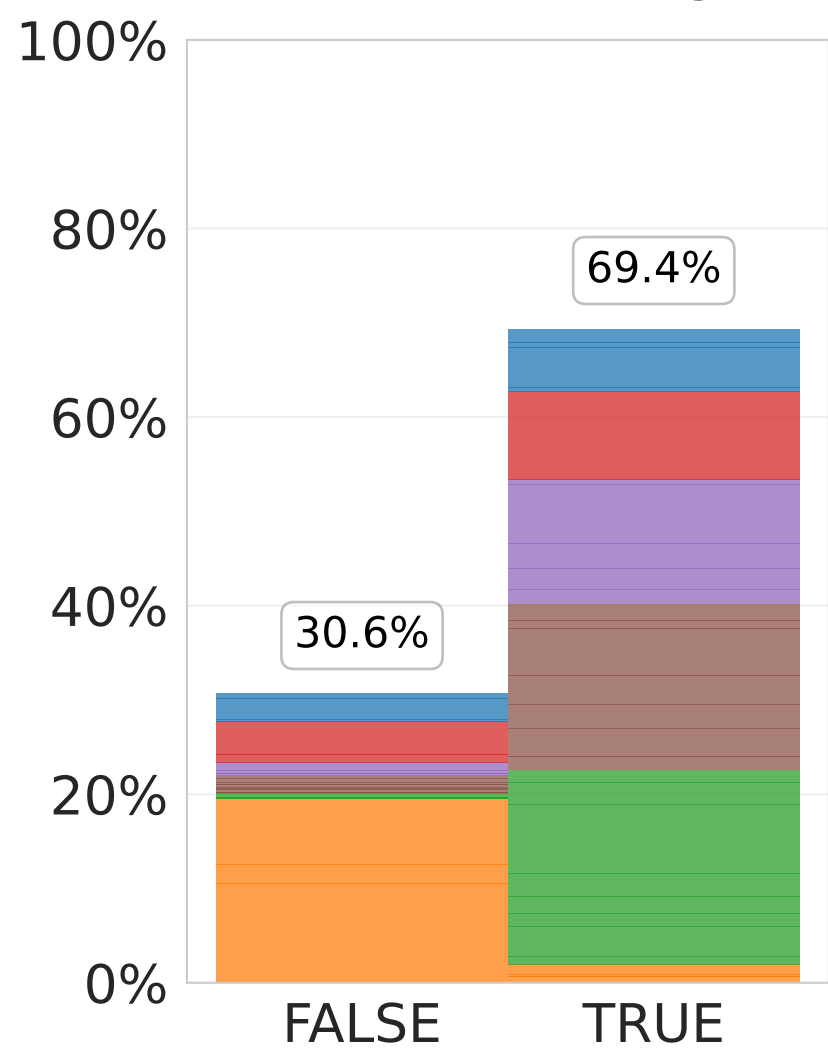

# TARGET VSA COSINE SIM

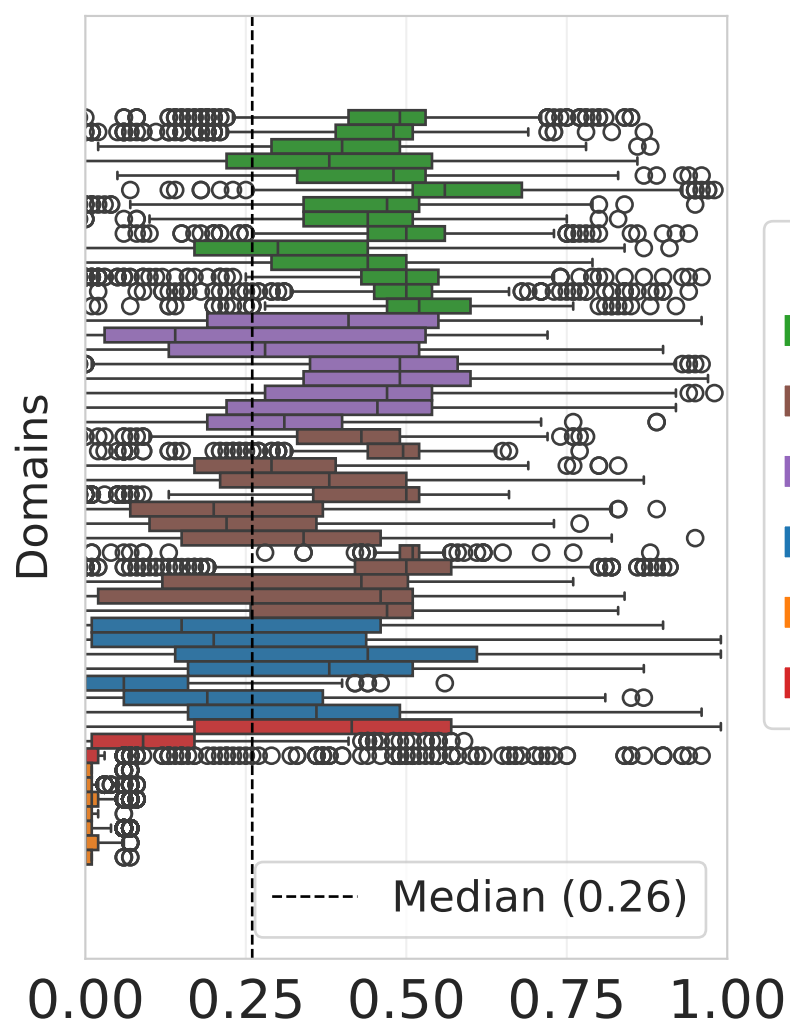

- AREAS (52 domains)
- Morphological Modifiers (14)
  - Verbal & Grammatical Forms (13)
  - Semantic Relations (8)
  - Factual Knowledge (7)
  - Mathematics (7)
  - Semantic Hierarchies (3)
