# Supplementary material
Source: ML conference proceedings conference paper supplement (https://openreview.net/forum?id=MSm0VFL9pq)
Supplement: supplementary_material [file WRONG_PREDICTIONS.xlsx]

## Sheet: items
area	domain	doc	target	generated_token	next_token_softmax	next_token_precision@5	top5_tokens	target_token_rank	target_token_softmax	target_token_softmax_diff	normalized_target_token_rank	unbunding_type	extracted_factors	target_vsa_cosine_sim	precision@1	precision@3	precision@5	best_item_type	vsa_sim
Factual Knowledge	capital_world	Luanda is to Angola as Nassau is to	bahamas	the	0.46	0	{'the': 0.46, 'The': 0.22, '__': 0.05, '______': 0.05, '___': 0.03}	6	0.0284424	0.430542	0.99994	key	key|target	0.99	TRUE	TRUE	TRUE	target	{'bahamas': 0.99}
Factual Knowledge	country_capital	Chile is to Santiago as Georgia is to	tbilisi	Atlanta	0.45	0	{'Atlanta': 0.45, '______': 0.05, '__': 0.05, ':': 0.02}	364	3.76701e-05	0.451134	0.996373	key	key|target	0.99	TRUE	TRUE	TRUE	target	{'tbilisi': 0.99}
Factual Knowledge	capital_world	Chile is to Santiago as Georgia is to	tbilisi	Atlanta	0.45	0	{'Atlanta': 0.45, '______': 0.05, '__': 0.05, ':': 0.02}	364	3.76701e-05	0.451134	0.996373	key	key|target	0.99	TRUE	TRUE	TRUE	target	{'tbilisi': 0.99}
Factual Knowledge	capital_world	Cyprus is to Nicosia as Norway is to	oslo	?	0.17	0	{'?': 0.07, 'what': 0.09, '______': 0.06, '': 0.03}	7	0.0252686	0.139771	0.99993	key	key|target	0.99	TRUE	TRUE	TRUE	target	{'oslo': 0.99}
Semantic Hierarchies	hypernyms_misc	diary is to journal as hairnet is to	net	______	0.11	0	{'______': 0.11, '__': 0.08, 'hair': 0.04, '_____': 0.04, '____': 0.04}	41	0.00306702	0.104843	0.999591	key	key|target	0.99	TRUE	TRUE	TRUE	target	{'net': 0.99}
Factual Knowledge	country_capital	Afghanistan is to Kabul as Norway is to	oslo	?	0.09	0	{'?': 0.09, 'what': 0.08, ':': 0.06}	6	0.0463867	0.0458984	0.99994	key	key|target	0.99	TRUE	TRUE	TRUE	target	{'oslo': 0.99}
Factual Knowledge	capital_world	Afghanistan is to Kabul as Norway is to	oslo	?	0.09	0	{'?': 0.09, 'what': 0.08, ':': 0.06}	6	0.0463867	0.0458984	0.99994	key	key|target	0.99	TRUE	TRUE	TRUE	target	{'oslo': 0.99}
Morphological Modifiers	re+verb_reg	calculate is to recalculate as develop is to	redevelop	develop	0.22	0	{'develop': 0.22, 'evolve': 0.06, '______': 0.05, '__': 0.04, '': 0.03}	26	0.00564575	0.213104	0.999741	key	key|target	0.98	TRUE	TRUE	TRUE	target	{'redevelop': 0.98}
Semantic Relations	antonyms_gradable	abundant is to scarce as aware is to	unaware	______	0.16	0	{'______': 0.16, '_____': 0.08, '____': 0.06, '': 0.05, 'ignorant': 0.04}	7	0.0310059	0.126221	0.99993	key	key|target	0.98	TRUE	TRUE	TRUE	target	{'unaware': 0.98}
Semantic Hierarchies	hypernyms_misc	pin is to hairpin as jar is to	vase	jar	0.11	0	{'jar': 0.11, 'lid': 0.1, '?': 0.06, 'what': 0.04, '______': 0.04}	86	0.000804901	0.107594	0.999143	key	key|target	0.98	TRUE	TRUE	TRUE	target	{'vase': 0.98}
Semantic Hierarchies	hypernyms_misc	notebook is to book as sunscreen is to	cream	____	0.08	0	{'____': 0.08, '___': 0.06, 'sun': 0.06, '': 0.06, '_____': 0.04}	122	0.000686646	0.0813446	0.998784	key	key|target	0.98	TRUE	TRUE	TRUE	target	{'cream': 0.98}
Morphological Modifiers	re+verb_reg	calculate is to recalculate as generate is to	regenerate	generate	0.54	0	{'generate': 0.54, 'create': 0.05, 'produce': 0.03, '______': 0.03, '__': 0.03}	7	0.00964355	0.533325	0.99993	key	key|target	0.97	TRUE	TRUE	TRUE	target	{'regenerate': 0.97}
Factual Knowledge	country_capital	France is to Paris as Georgia is to	tbilisi	Atlanta	0.4	0	{'Atlanta': 0.4, '__': 0.08, '______': 0.07, '?': 0.02, 'what': 0.02}	1243	6.4671e-06	0.396478	0.987614	key	key|target	0.97	TRUE	TRUE	TRUE	target	{'tbilisi': 0.97}
Factual Knowledge	capital_world	France is to Paris as Georgia is to	tbilisi	Atlanta	0.4	0	{'Atlanta': 0.4, '__': 0.08, '______': 0.07, '?': 0.02, 'what': 0.02}	1243	6.4671e-06	0.396478	0.987614	key	key|target	0.97	TRUE	TRUE	TRUE	target	{'tbilisi': 0.97}
Semantic Relations	antonyms_binary	ahead is to behind as fall is to	rise	spring	0.36	0	{'spring': 0.36, 'winter': 0.09, '': 0.03, '__': 0.03}	5	0.0241699	0.331299	0.99995	key	key|target	0.97	TRUE	TRUE	TRUE	target	{'rise': 0.97}
Morphological Modifiers	re+verb_reg	decorate is to redecorate as distribute is to	redistribute	distribute	0.29	0	{'distribute': 0.29, '': 0.1, '__': 0.03, '?': 0.02, 'dis': 0.02}	13	0.012085	0.280884	0.99987	key	key|target	0.97	TRUE	TRUE	TRUE	target	{'redistribute': 0.97}
Semantic Hierarchies	hypernyms_misc	fruit is to plum as container is to	tub	?	0.22	0	{'?': 0.05, '': 0.07, ':': 0.05, 'what': 0.05}	233	0.000229836	0.222426	0.997678	key	key|target	0.97	TRUE	TRUE	TRUE	target	{'tub': 0.97}
Semantic Hierarchies	hypernyms_misc	book is to notebook as container is to	tub	container	0.15	0	{'container': 0.15, '__': 0.04, 'what': 0.04, '______': 0.04, 'box': 0.03}	210	0.000423431	0.150944	0.997907	key	key|target	0.97	TRUE	TRUE	TRUE	target	{'tub': 0.97}
Semantic Hierarchies	hypernyms_misc	diary is to journal as tub is to	container	bath	0.1	0	{'bath': 0.1, '______': 0.07, 'tub': 0.06, '__': 0.06, 'what': 0.04}	95	0.00106049	0.097084	0.999053	key	key|target	0.97	TRUE	TRUE	TRUE	target	{'container': 0.97}
Semantic Hierarchies	hypernyms_misc	tv is to device as vase is to	jar	flower	0.42	0	{'flower': 0.42, 'flowers': 0.06, '?': 0.04, 'plant': 0.03, '__': 0.03}	108	0.00062561	0.41539	0.998924	key	key|target	0.96	TRUE	TRUE	TRUE	target	{'jar': 0.96}
Factual Knowledge	capital_world	Uruguay is to Montevideo as Georgia is to	tbilisi	Atlanta	0.28	0	{'Atlanta': 0.28, '______': 0.09, '__': 0.07, ':': 0.03}	425	3.43323e-05	0.275356	0.995765	key	key|target	0.96	TRUE	TRUE	TRUE	target	{'tbilisi': 0.96}
Factual Knowledge	capital_world	Albania is to Tirana as Eritrea is to	asmara	?	0.28	0	{'?': 0.05, '?"': 0.08, 'what': 0.05}	10	0.0166016	0.260742	0.9999	key	key|target	0.96	TRUE	TRUE	TRUE	target	{'asmara': 0.96}
Semantic Relations	animal_sound	alpaca is to bray as elk is to	bellow	bug	0.24	0	{'bug': 0.24, '______': 0.06, '': 0.04, '_____': 0.03}	78	0.00140381	0.242737	0.999223	key	key|target	0.96	TRUE	TRUE	TRUE	target	{'bellow': 0.96}
Morphological Modifiers	re+verb_reg	calculate is to recalculate as engage is to	reengage	engage	0.18	0	{'engage': 0.18, '______': 0.05, '__': 0.03, 'dis': 0.03, '': 0.03}	28	0.00363159	0.177032	0.999721	key	key|target	0.96	TRUE	TRUE	TRUE	target	{'reengage': 0.96}
Semantic Relations	animal_sound	bark is to dog as chirrup is to	songbird	cat	0.18	0	{'cat': 0.18, 'bird': 0.16, '______': 0.05, '': 0.03}	131	0.000572205	0.179115	0.998695	key	key|target	0.96	TRUE	TRUE	TRUE	target	{'songbird': 0.96}
Factual Knowledge	country_language	Guam is to English as Iran is to	persian	______	0.16	0	{'______': 0.16, '_____': 0.12, '___': 0.06, 'Arabic': 0.06, '____': 0.06}	5	0.0336914	0.126465	0.99995	key	key|target	0.96	TRUE	TRUE	TRUE	target	{'persian': 0.96}
Factual Knowledge	capital_world	Guyana is to Georgetown as Oman is to	muscat	?	0.13	0	{'?': 0.11, '____': 0.05, '______': 0.05, '_____': 0.05}	11	0.0257568	0.105103	0.99989	key	key|target	0.96	TRUE	TRUE	TRUE	target	{'muscat': 0.96}
Semantic Hierarchies	hyponyms_misc	camcorder is to camera as jeans is to	trousers	pants	0.11	0	{'pants': 0.11, 'clothing': 0.11, 'pant': 0.07, 'cloth': 0.07, 'clothes': 0.06}	7	0.0290527	0.0856934	0.99993	key	key|target	0.96	TRUE	TRUE	TRUE	target	{'trousers': 0.96}
Semantic Relations	antonyms_binary	exit is to entrance as southeast is to	southwest	"	0.1	0	{'"': 0.1, '______': 0.05, '?': 0.05, '': 0.05, 'northeast': 0.03}	6	0.0322266	0.0668945	0.99994	key	key|target	0.96	TRUE	TRUE	TRUE	target	{'southwest': 0.96}
Semantic Relations	animal_sound	dook is to ferret as chirrup is to	songbird		0.09	0	{'': 0.09, '______': 0.05, 'chir': 0.03, '_____': 0.03}	236	0.000310898	0.0944157	0.997648	key	key|target	0.96	TRUE	TRUE	TRUE	target	{'songbird': 0.96}
Morphological Modifiers	verb+er_irreg	eater is to eat as promoter is to	promote	______	0.08	0	{'______': 0.08, '__': 0.04, '': 0.03, 'promoter': 0.03, '?': 0.03}	7	0.020752	0.0617676	0.99993	key	key|target	0.96	TRUE	TRUE	TRUE	target	{'promote': 0.96}
Semantic Relations	male_female	poetess is to poet as madam is to	sir	_	0.08	0	{'_': 0.08, 'master': 0.05, '': 0.05, '____': 0.04, 'm': 0.04}	94	0.00127411	0.0748978	0.999063	key	key|target	0.96	TRUE	TRUE	TRUE	target	{'sir': 0.96}
Semantic Hierarchies	hypernyms_misc	notebook is to book as vase is to	jar		0.07	0	{'': 0.04, '____': 0.05, '__': 0.04, '______': 0.04}	50	0.00346375	0.0658722	0.999502	key	key|target	0.96	TRUE	TRUE	TRUE	target	{'jar': 0.96}
Semantic Relations	animal_sound	dook is to ferret as baa is to	sheep	______	0.07	0	{'______': 0.07, '_____': 0.07, '': 0.06, '____': 0.05, '___': 0.05}	9	0.0202637	0.0461426	0.99991	key	key|target	0.96	TRUE	TRUE	TRUE	target	{'sheep': 0.96}
Morphological Modifiers	verb+able_reg	afford is to affordable as perform is to	performable	______	0.06	0	{'______': 0.06, 'performance': 0.06, '__': 0.03, '?': 0.03, '': 0.03}	31	0.00720215	0.0567627	0.999691	key	key|target	0.96	TRUE	TRUE	TRUE	target	{'performable': 0.96}
Morphological Modifiers	re+verb_reg	examine is to reexamine as introduce is to	reintroduce	introduce	0.63	0	{'introduce': 0.63, 'present': 0.03, 'initiate': 0.02, 'invent': 0.01, '': 0.01}	12	0.00424194	0.628571	0.99988	key	key|target	0.95	TRUE	TRUE	TRUE	target	{'reintroduce': 0.95}
Morphological Modifiers	re+verb_reg	calculate is to recalculate as introduce is to	reintroduce	introduce	0.4	0	{'introduce': 0.4, 'invent': 0.03, '______': 0.02, '': 0.02, '__': 0.02}	12	0.00878906	0.389648	0.99988	key	key|target	0.95	TRUE	TRUE	TRUE	target	{'reintroduce': 0.95}
Morphological Modifiers	re+verb_reg	calculate is to recalculate as upload is to	reupload	upload	0.25	0	{'upload': 0.25, 'download': 0.12, 'down': 0.03, 'load': 0.03, 'up': 0.02}	43	0.00228882	0.246735	0.999572	key	key|target	0.95	TRUE	TRUE	TRUE	target	{'reupload': 0.95}
Semantic Hierarchies	hypernyms_misc	photo is to picture as sunscreen is to	cream	sun	0.16	0	{'sun': 0.16, 'lotion': 0.07, 'protect': 0.05, '______': 0.04, '': 0.03}	78	0.00161743	0.153656	0.999223	key	key|target	0.95	TRUE	TRUE	TRUE	target	{'cream': 0.95}
Morphological Modifiers	adj+ly_reg	culturally is to cultural as rarely is to	rare	frequently	0.14	0	{'frequently': 0.14, 'often': 0.12, '______': 0.05, 'seldom': 0.05, 'common': 0.04}	5	0.0351562	0.104492	0.99995	key	key|target	0.95	TRUE	TRUE	TRUE	target	{'rare': 0.95}
Semantic Hierarchies	hypernyms_misc	journal is to diary as brush is to	toothbrush	paint	0.14	0	{'paint': 0.14, 'brush': 0.07, '__': 0.05, '______': 0.05, 'comb': 0.05}	7	0.0284424	0.1073	0.99993	key	key|target	0.95	TRUE	TRUE	TRUE	target	{'toothbrush': 0.95}
Factual Knowledge	country_capital	Indonesia is to Jakarta as Philippines is to	manila	______	0.11	0	{'______': 0.11, ':': 0.08, '____': 0.06, '': 0.06, '?': 0.05}	6	0.050293	0.0561523	0.99994	key	key|target	0.95	TRUE	TRUE	TRUE	target	{'manila': 0.95}
Factual Knowledge	capital_world	Indonesia is to Jakarta as Philippines is to	manila	______	0.11	0	{'______': 0.11, ':': 0.08, '____': 0.06, '': 0.06, '?': 0.05}	6	0.050293	0.0561523	0.99994	key	key|target	0.95	TRUE	TRUE	TRUE	target	{'manila': 0.95}
Semantic Relations	male_female	father is to mother as ram is to	ewe	?	0.11	0	{'?': 0.07, 'lamb': 0.06, 'what': 0.06, '____': 0.04}	2349	5.66244e-06	0.109858	0.976592	key	key|target	0.95	TRUE	TRUE	TRUE	target	{'ewe': 0.95}
Verbal & Grammatical Forms	past_tense	read is to reading as spent is to	spending	______	0.11	0	{'______': 0.11, '__': 0.06, '____': 0.04, '': 0.04, ':': 0.04}	6	0.0327148	0.081543	0.99994	key	key|target	0.95	TRUE	TRUE	TRUE	target	{'spending': 0.95}
Semantic Hierarchies	hypernyms_misc	blender is to appliance as tub is to	container	bathroom	0.1	0	{'bathroom': 0.1, 'bathtub': 0.05, 'bath': 0.05, '?': 0.05, '__': 0.05}	87	0.00117493	0.0950165	0.999133	key	key|target	0.95	TRUE	TRUE	TRUE	target	{'container': 0.95}
Semantic Relations	antonyms_gradable	clean is to dirty as close is to	distant	open	0.1	0	{'open': 0.1, 'far': 0.08, '______': 0.07, '_____': 0.05, '': 0.05}	32	0.00610352	0.095459	0.999681	key	key|target	0.95	TRUE	TRUE	TRUE	target	{'distant': 0.95}
Semantic Hierarchies	hypernyms_misc	hairpin is to pin as notepad is to	pad	paper	0.08	0	{'paper': 0.08, 'notebook': 0.07, 'not': 0.06, 'word': 0.04, 'text': 0.04}	6	0.0375977	0.046875	0.99994	key	key|target	0.95	TRUE	TRUE	TRUE	target	{'pad': 0.95}
Semantic Hierarchies	hypernyms_misc	computer is to device as tub is to	container	bath	0.07	0	{'bath': 0.07, 'bathtub': 0.06, 'tub': 0.03, '__': 0.03, '______': 0.03}	31	0.00466919	0.0641785	0.999691	key	key|target	0.95	TRUE	TRUE	TRUE	target	{'container': 0.95}
Semantic Relations	animal_sound	deer is to bellow as gorilla is to	grunt	__	0.07	0	{'__': 0.07, 'beat': 0.07, '_____': 0.05, 'roar': 0.05, '': 0.05}	15	0.0177002	0.0570068	0.999851	key	key|target	0.95	TRUE	TRUE	TRUE	target	{'grunt': 0.95}
Semantic Hierarchies	hypernyms_misc	photo is to picture as tub is to	container	?	0.05	0	{'?': 0.05, '_____': 0.05, '______': 0.04, '': 0.04, ':': 0.04}	65	0.00224304	0.0458527	0.999352	key	key|target	0.95	TRUE	TRUE	TRUE	target	{'container': 0.95}
Morphological Modifiers	re+verb_reg	calculate is to recalculate as deem is to	redeem	deem	0.88	0	{'deem': 0.88, 'de': 0.03, 'deemed': 0.0, 'decree': 0.0, '__': 0.0}	40	0.000333786	0.874666	0.999601	key	key|target	0.94	TRUE	TRUE	TRUE	target	{'redeem': 0.94}
Morphological Modifiers	re+verb_reg	confirm is to reconfirm as introduce is to	reintroduce	introduce	0.51	0	{'introduce': 0.51, 'initiate': 0.04, 'present': 0.04, 'familiar': 0.01, 'acquaint': 0.01}	6	0.0108643	0.496948	0.99994	key	key|target	0.94	TRUE	TRUE	TRUE	target	{'reintroduce': 0.94}
Semantic Relations	animal_sound	bray is to alpaca as moo is to	cattle	cow	0.4	0	{'cow': 0.4, '____': 0.05, '_____': 0.05, '______': 0.04, 'what': 0.03}	63	0.00136566	0.400978	0.999372	key	key|target	0.94	TRUE	TRUE	TRUE	target	{'cattle': 0.94}
Factual Knowledge	capital_world	Mozambique is to Maputo as Georgia is to	tbilisi	Atlanta	0.37	0	{'Atlanta': 0.37, '______': 0.04, '__': 0.04, '?': 0.04, ':': 0.03}	243	0.000102043	0.370992	0.997579	key	key|target	0.94	TRUE	TRUE	TRUE	target	{'tbilisi': 0.94}
Semantic Hierarchies	hypernyms_misc	pin is to hairpin as picture is to	photo	frame	0.24	0	{'frame': 0.24, 'picture': 0.1, '______': 0.08, 'canvas': 0.04, '__': 0.04}	15	0.00946045	0.23468	0.999851	key	key|target	0.94	TRUE	TRUE	TRUE	target	{'photo': 0.94}
Semantic Hierarchies	hypernyms_misc	diary is to journal as sunscreen is to	cream	sun	0.21	0	{'sun': 0.21, 'lotion': 0.2, 'sunscreen': 0.09, 'sunt': 0.04, 'a': 0.04}	35	0.00205994	0.208878	0.999651	key	key|target	0.94	TRUE	TRUE	TRUE	target	{'cream': 0.94}
Semantic Hierarchies	hypernyms_misc	fruit is to peach as container is to	tub	?	0.15	0	{'?': 0.04, 'what': 0.06, '': 0.06, ':': 0.05}	381	0.000119686	0.153201	0.996203	key	key|target	0.94	TRUE	TRUE	TRUE	target	{'tub': 0.94}
Factual Knowledge	country_capital	Australia is to Canberra as Georgia is to	tbilisi	Atlanta	0.14	0	{'Atlanta': 0.14, '?"': 0.06, '?': 0.08, ':': 0.07}	413	3.40939e-05	0.143521	0.995884	key	key|target	0.94	TRUE	TRUE	TRUE	target	{'tbilisi': 0.94}
Morphological Modifiers	noun+less_reg	bone is to boneless as speech is to	speechless	thought	0.14	0	{'thought': 0.14, 'writing': 0.1, '______': 0.06, 'silence': 0.05, '____': 0.04}	6	0.0322266	0.103516	0.99994	key	key|target	0.94	TRUE	TRUE	TRUE	target	{'speechless': 0.94}
Semantic Hierarchies	hypernyms_misc	computer is to device as vase is to	jar	flower	0.13	0	{'flower': 0.13, '?': 0.08, '': 0.04, '__': 0.03, 'what': 0.03}	45	0.00430298	0.129486	0.999552	key	key|target	0.94	TRUE	TRUE	TRUE	target	{'jar': 0.94}
Semantic Relations	antonyms_gradable	abundant is to scarce as clear is to	vague	murky	0.12	0	{'murky': 0.12, 'muddy': 0.08, 'cloudy': 0.08, '______': 0.07, '': 0.04}	67	0.00170898	0.11792	0.999332	key	key|target	0.94	TRUE	TRUE	TRUE	target	{'vague': 0.94}
Morphological Modifiers	verb+tion_irreg	computation is to compute as exploration is to	explore	travel	0.11	0	{'travel': 0.11, 'discovery': 0.09, '': 0.05, 'discover': 0.03, 'play': 0.03}	56	0.00263977	0.102829	0.999442	key	key|target	0.94	TRUE	TRUE	TRUE	target	{'explore': 0.94}
Morphological Modifiers	verb+able_reg	afford is to affordable as deliver is to	deliverable	______	0.09	0	{'______': 0.09, '__': 0.07, 'delivery': 0.05, 'delivered': 0.04, '': 0.04}	5	0.0361328	0.0561523	0.99995	key	key|target	0.94	TRUE	TRUE	TRUE	target	{'deliverable': 0.94}
Morphological Modifiers	verb+er_irreg	eater is to eat as sender is to	send	message	0.09	0	{'message': 0.09, 'receiver': 0.09, '______': 0.09, '__': 0.03, '_____': 0.03}	5	0.0253906	0.0688477	0.99995	key	key|target	0.94	TRUE	TRUE	TRUE	target	{'send': 0.94}
Semantic Relations	male_female	businessman is to businesswoman as ram is to	ewe	lamb	0.09	0	{'lamb': 0.09, '?': 0.05, '______': 0.05, '____': 0.05, 'sheep': 0.04}	765	3.60012e-05	0.0946906	0.992377	key	key|target	0.94	TRUE	TRUE	TRUE	target	{'ewe': 0.94}
Semantic Relations	male_female	grandfather is to grandmother as ram is to	ewe	ram	0.08	0	{'ram': 0.08, 's': 0.04, '______': 0.04, '____': 0.04, '___': 0.04}	8535	1.13994e-06	0.0786121	0.914949	key	key|target	0.94	TRUE	TRUE	TRUE	target	{'ewe': 0.94}
Semantic Hierarchies	hypernyms_misc	diary is to journal as vase is to	jar	__	0.07	0	{'__': 0.07, '______': 0.05, '': 0.03, '_': 0.03}	30	0.00717163	0.0611877	0.999701	key	key|target	0.94	TRUE	TRUE	TRUE	target	{'jar': 0.94}
Semantic Hierarchies	hypernyms_misc	journal is to diary as container is to	tub		0.07	0	{'': 0.05, '_____': 0.05, '______': 0.04, 'box': 0.04}	122	0.000865936	0.0704231	0.998784	key	key|target	0.94	TRUE	TRUE	TRUE	target	{'tub': 0.94}
Semantic Hierarchies	hyponyms_misc	pot is to cookware as teacup is to	cup	__	0.07	0	{'__': 0.07, '______': 0.07, 'china': 0.06, '': 0.04, 'te': 0.04}	28	0.00738525	0.0648804	0.999721	greedy	pair_values|target	0.94	TRUE	TRUE	TRUE	target	{'cup': 0.94}
Morphological Modifiers	re+verb_reg	consider is to reconsider as deem is to	redeem	deem	0.88	0	{'deem': 0.88, 'de': 0.05, 'judge': 0.01, 'think': 0.01, 'esteem': 0.0}	492	9.89437e-06	0.87499	0.995097	key	key|target	0.93	TRUE	TRUE	TRUE	target	{'redeem': 0.93}
Semantic Relations	antonyms_binary	interior is to exterior as outward is to	upward	inward	0.77	0	{'inward': 0.77, '______': 0.02, '"': 0.02, '__': 0.01, '': 0.01}	48	0.000957489	0.768574	0.999522	key	key|target	0.93	TRUE	TRUE	TRUE	target	{'upward': 0.93}
Factual Knowledge	capital_world	London is to England as Nassau is to	bahamas	the	0.38	0	{'the': 0.38, 'The': 0.13, 'what': 0.05, '______': 0.04, '__': 0.03}	5	0.0327148	0.342285	0.99995	key	key|target	0.93	TRUE	TRUE	TRUE	target	{'bahamas': 0.93}
Semantic Hierarchies	hypernyms_misc	book is to notebook as brush is to	toothbrush	paint	0.26	0	{'paint': 0.26, 'canvas': 0.07, 'brush': 0.05, '______': 0.04, '__': 0.03}	68	0.00143433	0.254425	0.999322	key	key|target	0.93	TRUE	TRUE	TRUE	target	{'toothbrush': 0.93}
Morphological Modifiers	re+verb_reg	decorate is to redecorate as develop is to	redevelop	develop	0.25	0	{'develop': 0.25, 'evolve': 0.07, '': 0.05, 'grow': 0.04, '__': 0.04}	164	0.000379562	0.251574	0.998366	key	key|target	0.93	TRUE	TRUE	TRUE	target	{'redevelop': 0.93}
Semantic Hierarchies	hypernyms_misc	lotion is to toiletry as tub is to	container	?	0.23	0	{'?': 0.04, '': 0.12, 'bathroom': 0.08, '?"': 0.03}	88	0.000694275	0.224892	0.999123	key	key|target	0.93	TRUE	TRUE	TRUE	target	{'container': 0.93}
Semantic Hierarchies	hypernyms_misc	fuel is to gasoline as jar is to	vase	peanut	0.22	0	{'peanut': 0.22, 'jar': 0.16, 'glass': 0.07, 'cookie': 0.05, 'jelly': 0.04}	10	0.0114746	0.204346	0.9999	key	key|target	0.93	TRUE	TRUE	TRUE	target	{'vase': 0.93}
Semantic Hierarchies	hypernyms_misc	book is to notebook as cream is to	sunscreen	milk	0.21	0	{'milk': 0.21, 'coffee': 0.05, '_': 0.05, '____': 0.04, '______': 0.04}	991	2.00272e-05	0.208964	0.990125	key	key|target	0.93	TRUE	TRUE	TRUE	target	{'sunscreen': 0.93}
Semantic Hierarchies	hypernyms_misc	sweater is to clothes as tub is to	container	bathroom	0.19	0	{'bathroom': 0.19, 'bath': 0.08, 'water': 0.05, '?': 0.04, '': 0.04}	124	0.000579834	0.193756	0.998764	key	key|target	0.93	TRUE	TRUE	TRUE	target	{'container': 0.93}
Semantic Hierarchies	hypernyms_misc	pin is to hairpin as book is to	notebook	book	0.14	0	{'book': 0.14, 'library': 0.08, '______': 0.07, 'novel': 0.04, '__': 0.04}	25	0.00717163	0.128571	0.999751	key	key|target	0.93	TRUE	TRUE	TRUE	target	{'notebook': 0.93}
Factual Knowledge	capital_world	Sudan is to Khartoum as Norway is to	oslo	______	0.12	0	{'______': 0.12, '?': 0.07, '__': 0.06, 'what': 0.06}	5	0.0583496	0.0578613	0.99995	key	key|target	0.93	TRUE	TRUE	TRUE	target	{'oslo': 0.93}
Morphological Modifiers	re+verb_reg	invest is to reinvest as upload is to	reupload	download	0.12	0	{'download': 0.12, 'upload': 0.08, '__': 0.03, '': 0.03, '?': 0.03}	81	0.00125885	0.118858	0.999193	key	key|target	0.93	TRUE	TRUE	TRUE	target	{'reupload': 0.93}
Semantic Relations	animal_sound	bleat is to goat as chirrup is to	songbird		0.12	0	{'': 0.1, ':': 0.05, '?': 0.05, '______': 0.05}	342	9.63211e-05	0.122462	0.996592	key	key|target	0.93	TRUE	TRUE	TRUE	target	{'songbird': 0.93}
Morphological Modifiers	re+verb_reg	assure is to reassure as organize is to	reorganize	?	0.11	0	{'?': 0.11, '': 0.05, 'organize': 0.08, '______': 0.07}	24	0.00744629	0.102417	0.999761	key	key|target	0.93	TRUE	TRUE	TRUE	target	{'reorganize': 0.93}
Morphological Modifiers	verb+able_reg	afford is to affordable as recognize is to	recognizable	______	0.1	0	{'______': 0.1, ':': 0.04, '': 0.05, '__': 0.05}	37	0.00543213	0.0912476	0.999631	key	key|target	0.93	TRUE	TRUE	TRUE	target	{'recognizable': 0.93}
Morphological Modifiers	verb+er_irreg	eater is to eat as receiver is to	receive	______	0.1	0	{'______': 0.1, 'receiver': 0.07, '_____': 0.03, '__': 0.03, 'what': 0.03}	78	0.00164795	0.0940552	0.999223	key	key|target	0.93	TRUE	TRUE	TRUE	target	{'receive': 0.93}
Semantic Relations	antonyms_binary	back is to front as southwest is to	southeast		0.08	0	{'': 0.08, '______': 0.08, 'northeast': 0.06, 'north': 0.06, '_____': 0.05}	14	0.0192871	0.0568848	0.99986	key	key|target	0.93	TRUE	TRUE	TRUE	target	{'southeast': 0.93}
Semantic Relations	male_female	brother is to sister as ram is to	ewe	?	0.08	0	{'?': 0.04, 'whom': 0.07, '______': 0.04, '': 0.04}	17464	1.3411e-07	0.0839842	0.825973	key	key|target	0.93	TRUE	TRUE	TRUE	target	{'ewe': 0.93}
Semantic Hierarchies	hypernyms_misc	hairpin is to pin as vase is to	jar	______	0.07	0	{'______': 0.07, '?': 0.05, '': 0.05, 'flower': 0.04, 'a': 0.03}	63	0.0022583	0.0636597	0.999372	key	key|target	0.93	TRUE	TRUE	TRUE	target	{'jar': 0.93}
Semantic Hierarchies	hypernyms_misc	peach is to fruit as tub is to	container	______	0.07	0	{'______': 0.07, '_____': 0.06, ':': 0.05, '': 0.04, 'water': 0.04}	463	7.43866e-05	0.0663319	0.995386	key	key|target	0.93	TRUE	TRUE	TRUE	target	{'container': 0.93}
Semantic Hierarchies	hypernyms_misc	notebook is to book as tub is to	container		0.07	0	{'': 0.07, '__': 0.05, '____': 0.05, '_____': 0.04, '______': 0.04}	124	0.000766754	0.0705223	0.998764	key	key|target	0.93	TRUE	TRUE	TRUE	target	{'container': 0.93}
Semantic Hierarchies	hyponyms_misc	daypack is to backpack as cake is to	dessert	______	0.07	0	{'______': 0.07, '__': 0.07, 'bake': 0.03, '____': 0.02, 'cake': 0.02}	5	0.0228271	0.0518799	0.99995	key	key|target	0.93	TRUE	TRUE	TRUE	target	{'dessert': 0.93}
Semantic Hierarchies	hypernyms_misc	sweater is to clothes as vase is to	jar	?	0.05	0	{'?': 0.05, '__': 0.04, 'ceramics': 0.04, '': 0.04, 'what': 0.03}	281	0.000214577	0.0454397	0.9972	key	key|target	0.93	TRUE	TRUE	TRUE	target	{'jar': 0.93}
Semantic Hierarchies	hyponyms_misc	camcorder is to camera as cake is to	dessert	cook	0.05	0	{'cook': 0.05, '______': 0.05, '__': 0.05, 'baker': 0.04, 'bakery': 0.04}	12	0.0154419	0.0353394	0.99988	key	key|target	0.93	TRUE	TRUE	TRUE	target	{'dessert': 0.93}
Factual Knowledge	capital_world	Mali is to Bamako as Belize is to	belmopan	:	0.25	0	{':': 0.05, '?': 0.1, '______': 0.04}	6	0.0283203	0.223633	0.99994	key	key|target	0.92	TRUE	TRUE	TRUE	target	{'belmopan': 0.92}
Semantic Relations	animal_shelter	lion is to den as mole is to	hole	bur	0.25	0	{'bur': 0.25, 'hill': 0.1, '': 0.04, '?': 0.04}	24	0.00552368	0.244476	0.999761	key	key|target	0.92	TRUE	TRUE	TRUE	target	{'hole': 0.92}
Morphological Modifiers	adj+ness_reg	directedness is to directed as happiness is to	happy	happiness	0.23	0	{'happiness': 0.23, 'pleasure': 0.11, 'unh': 0.05, '______': 0.05, '__': 0.03}	6	0.0238037	0.201782	0.99994	key	key|target	0.92	TRUE	TRUE	TRUE	target	{'happy': 0.92}
Factual Knowledge	capital_world	Pakistan is to Islamabad as Egypt is to	cairo	:	0.2	0	{':': 0.06, '?': 0.04}	5	0.034668	0.164551	0.99995	key	key|target	0.92	TRUE	TRUE	TRUE	target	{'cairo': 0.92}
Semantic Hierarchies	hypernyms_misc	pin is to hairpin as card is to	postcard	deck	0.17	0	{'deck': 0.17, '____': 0.06, 'baseball': 0.05, '______': 0.05, '__': 0.05}	51	0.00210571	0.164886	0.999492	key	key|target	0.92	TRUE	TRUE	TRUE	target	{'postcard': 0.92}
Morphological Modifiers	noun+less_reg	spine is to spineless as wit is to	witless	______	0.15	0	{'______': 0.15, '____': 0.05, '__': 0.03, 'what': 0.03, 'dull': 0.03}	7	0.0239258	0.122559	0.99993	key	key|target	0.92	TRUE	TRUE	TRUE	target	{'witless': 0.92}
Semantic Relations	animal_sound	deer is to bellow as whale is to	sing	?	0.14	0	{'?': 0.04, '': 0.04, '(': 0.05}	8	0.0297852	0.112793	0.99992	key	key|target	0.92	TRUE	TRUE	TRUE	target	{'sing': 0.92}
Semantic Hierarchies	hypernyms_misc	toiletry is to deodorant as walk is to	sidewalk	run	0.13	0	{'run': 0.13, '?': 0.03, 'crawl': 0.04, '': 0.03}	111	0.000888824	0.127041	0.998894	key	key|target	0.92	TRUE	TRUE	TRUE	target	{'sidewalk': 0.92}
Semantic Relations	antonyms_gradable	dry is to wet as energetic is to	lethargic	lazy	0.12	0	{'lazy': 0.12, '': 0.05, '?': 0.05, 'sluggish': 0.05, 'tired': 0.05}	8	0.019043	0.097168	0.99992	key	key|target	0.92	TRUE	TRUE	TRUE	target	{'lethargic': 0.92}
Semantic Hierarchies	hypernyms_misc	stapler is to device as tub is to	container		0.09	0	{'': 0.09, '______': 0.05, '?': 0.05, ':': 0.04, 'what': 0.04}	42	0.00454712	0.0813904	0.999581	key	key|target	0.92	TRUE	TRUE	TRUE	target	{'container': 0.92}
Semantic Relations	animal_sound	ferret is to dook as whale is to	sing		0.09	0	{'': 0.07, '?': 0.04, '______': 0.04, 'sp': 0.03}	22	0.010437	0.0769653	0.999781	key	key|target	0.92	TRUE	TRUE	TRUE	target	{'sing': 0.92}
Semantic Relations	animal_sound	trumpet is to elephant as chirrup is to	songbird		0.09	0	{'': 0.07, ':': 0.05, '______': 0.05, '?': 0.04}	150	0.000511169	0.0854263	0.998505	key	key|target	0.92	TRUE	TRUE	TRUE	target	{'songbird': 0.92}
Semantic Relations	antonyms_gradable	dry is to wet as organized is to	unorganized		0.08	0	{'': 0.05, 'chaotic': 0.06, 'dis': 0.06, '_': 0.03}	10	0.0175781	0.0610352	0.9999	key	key|target	0.92	TRUE	TRUE	TRUE	target	{'unorganized': 0.92}
Semantic Relations	male_female	valet is to maid as waiter is to	waitress	:	0.08	0	{':': 0.08, 'what': 0.06, '____': 0.05, '______': 0.05, '': 0.04}	13	0.020874	0.0567627	0.99987	key	key|target	0.92	TRUE	TRUE	TRUE	target	{'waitress': 0.92}
Semantic Hierarchies	hypernyms_misc	pad is to notepad as card is to	postcard	deck	0.07	0	{'deck': 0.07, '?': 0.06, '____': 0.04, 'card': 0.04, '__': 0.04}	124	0.000598907	0.0726433	0.998764	key	key|target	0.92	TRUE	TRUE	TRUE	target	{'postcard': 0.92}
Semantic Hierarchies	hypernyms_misc	computer is to device as hairnet is to	net		0.06	0	{'': 0.06, 'chef': 0.06, 'restaurant': 0.06, 'cook': 0.05, '?': 0.03}	1504	2.55108e-05	0.0590565	0.985013	key	key|target	0.92	TRUE	TRUE	TRUE	target	{'net': 0.92}
Semantic Relations	antonyms_binary	ahead is to behind as drop is to	lift		0.05	0	{'': 0.05, '______': 0.05, 'rise': 0.05, 'fall': 0.04, '__': 0.04}	13	0.0144043	0.0390625	0.99987	key	key|target	0.92	TRUE	TRUE	TRUE	target	{'lift': 0.92}
Semantic Relations	antonyms_binary	inside is to outside as inverse is to	reverse	direct	0.65	0	{'direct': 0.65, 'inverse': 0.04, 'product': 0.04, 'division': 0.02, 'normal': 0.02}	6	0.00793457	0.644409	0.99994	key	key|target	0.91	TRUE	TRUE	TRUE	target	{'reverse': 0.91}
Morphological Modifiers	re+verb_reg	adjust is to readjust as locate is to	relocate	locate	0.49	0	{'locate': 0.49, 'find': 0.12, 'location': 0.09, 'search': 0.07, 'lookup': 0.04}	11	0.00274658	0.489441	0.99989	key	key|target	0.91	TRUE	TRUE	TRUE	target	{'relocate': 0.91}
Semantic Relations	antonyms_binary	input is to output as outward is to	upward	inward	0.47	0	{'inward': 0.47, '?': 0.06, '': 0.05, 'outward': 0.04, 'inside': 0.03}	23	0.00282288	0.471786	0.999771	key	key|target	0.91	TRUE	TRUE	TRUE	target	{'upward': 0.91}
Semantic Relations	antonyms_binary	after is to before as inverse is to	reverse	direct	0.4	0	{'direct': 0.4, 'inverse': 0.03, 'division': 0.03, 'product': 0.03, 'what': 0.03}	23	0.00601196	0.390472	0.999771	key	key|target	0.91	TRUE	TRUE	TRUE	target	{'reverse': 0.91}
Morphological Modifiers	re+verb_reg	decorate is to redecorate as introduce is to	reintroduce	introduce	0.38	0	{'introduce': 0.38, 'acquaint': 0.07, 'present': 0.06, '': 0.03}	43	0.00186157	0.375092	0.999572	key	key|target	0.91	TRUE	TRUE	TRUE	target	{'reintroduce': 0.91}
Factual Knowledge	capital_world	Lusaka is to Zambia as Nassau is to	bahamas	the	0.37	0	{'the': 0.37, 'The': 0.13, '__': 0.08, '___': 0.07, '______': 0.05}	6	0.0218506	0.343384	0.99994	key	key|target	0.91	TRUE	TRUE	TRUE	target	{'bahamas': 0.91}
Semantic Relations	animal_sound	elephant is to trumpet as hornet is to	buzz	sting	0.23	0	{'sting': 0.23, '?': 0.06, '': 0.05, '(': 0.04, ':': 0.04}	15	0.0180664	0.209473	0.999851	key	key|target	0.91	TRUE	TRUE	TRUE	target	{'buzz': 0.91}
Semantic Hierarchies	hypernyms_misc	pin is to hairpin as band is to	wristband	band	0.22	0	{'band': 0.22, 'ring': 0.05, 'orchestra': 0.05, 'bracelet': 0.04, 'what': 0.03}	9	0.0147705	0.202026	0.99991	key	key|target	0.91	TRUE	TRUE	TRUE	target	{'wristband': 0.91}
Verbal & Grammatical Forms	noun_plural_irreg	category is to categories as strategy is to	strategies	games	0.22	0	{'games': 0.22, 'tactics': 0.21, 'war': 0.07, 'game': 0.06, 'planning': 0.03}	42	0.00117493	0.222458	0.999581	key	key|target	0.91	TRUE	TRUE	TRUE	target	{'strategies': 0.91}
Verbal & Grammatical Forms	noun_plural_irreg	industry is to industries as life is to	lives	living	0.22	0	{'living': 0.22, 'the': 0.09, '': 0.05, 'life': 0.05, 'man': 0.04}	11	0.0180664	0.202637	0.99989	key	key|target	0.91	TRUE	TRUE	TRUE	target	{'lives': 0.91}
Factual Knowledge	capital_world	Guyana is to Georgetown as Philippines is to	manila		0.17	0	{'': 0.05, '______': 0.13, '"': 0.07, '?': 0.05}	6	0.0412598	0.132568	0.99994	key	key|target	0.91	TRUE	TRUE	TRUE	target	{'manila': 0.91}
Morphological Modifiers	re+verb_reg	assure is to reassure as generate is to	regenerate	generate	0.16	0	{'generate': 0.16, '?': 0.04, '': 0.05, '______': 0.05}	6	0.0322266	0.130859	0.99994	key	key|target	0.91	TRUE	TRUE	TRUE	target	{'regenerate': 0.91}
Semantic Hierarchies	hypernyms_misc	shirt is to clothes as tub is to	container	?	0.16	0	{'?': 0.05, 'bathroom': 0.13, 'bath': 0.05, 'water': 0.05}	148	0.000307083	0.160826	0.998525	key	key|target	0.91	TRUE	TRUE	TRUE	target	{'container': 0.91}
Semantic Hierarchies	hypernyms_misc	cake is to dessert as cup is to	tableware	drink	0.15	0	{'drink': 0.15, '?': 0.07, 'what': 0.06, 'liquid': 0.06, '?"': 0.05}	54	0.00268555	0.148682	0.999462	key	key|target	0.91	TRUE	TRUE	TRUE	target	{'tableware': 0.91}
Semantic Relations	antonyms_binary	occupied is to vacant as toward is to	away		0.13	0	{'': 0.06, '?': 0.08, ':': 0.04}	14	0.0141602	0.120605	0.99986	key	key|target	0.91	TRUE	TRUE	TRUE	target	{'away': 0.91}
Morphological Modifiers	comparative	cooler is to cool as weaker is to	weak	stronger	0.11	0	{'stronger': 0.11, '______': 0.07, 'strong': 0.04, '_____': 0.03, 'weaker': 0.03}	32	0.00518799	0.10614	0.999681	key	key|target	0.91	TRUE	TRUE	TRUE	target	{'weak': 0.91}
Semantic Hierarchies	hypernyms_misc	diary is to journal as gasoline is to	fuel	oil	0.11	0	{'oil': 0.11, 'diesel': 0.07, 'a': 0.06, 'petrol': 0.06, 'car': 0.05}	5	0.0476074	0.0598145	0.99995	key	key|target	0.91	TRUE	TRUE	TRUE	target	{'fuel': 0.91}
Semantic Relations	animal_sound	coo is to pigeon as chirrup is to	songbird		0.1	0	{'': 0.09, ':': 0.07, '?': 0.05}	199	0.000214577	0.0993948	0.998017	key	key|target	0.91	TRUE	TRUE	TRUE	target	{'songbird': 0.91}
Semantic Hierarchies	hypernyms_misc	bracelet is to jewelry as sunscreen is to	cream	skin	0.09	0	{'skin': 0.09, 'beach': 0.07, '______': 0.06, 'what': 0.06, '____': 0.05}	222	0.000151634	0.0945749	0.997788	key	key|target	0.91	TRUE	TRUE	TRUE	target	{'cream': 0.91}
Semantic Relations	animal_sound	coo is to pigeon as baa is to	sheep	?	0.09	0	{'?': 0.05, '': 0.06, '_____': 0.05, ':': 0.05}	7	0.0446777	0.0495605	0.99993	key	key|target	0.91	TRUE	TRUE	TRUE	target	{'sheep': 0.91}
Semantic Relations	male_female	fisherman is to fisherwoman as ram is to	ewe	______	0.09	0	{'______': 0.09, '_____': 0.07, '____': 0.07, '?': 0.06, '': 0.06}	371	6.86646e-05	0.0873337	0.996303	key	key|target	0.91	TRUE	TRUE	TRUE	target	{'ewe': 0.91}
Semantic Relations	animal_sound	quack is to mallard as sing is to	whale		0.08	0	{'': 0.04, 'sing': 0.06, '_____': 0.04, '______': 0.03}	269	0.000261307	0.0817699	0.997319	key	key|target	0.91	TRUE	TRUE	TRUE	target	{'whale': 0.91}
Morphological Modifiers	re+verb_reg	negotiate is to renegotiate as upload is to	reupload	download	0.84	0	{'download': 0.84, 'upload': 0.01, 'downloading': 0.01, '': 0.01}	12	0.00144958	0.834488	0.99988	key	key|target	0.9	TRUE	TRUE	TRUE	target	{'reupload': 0.9}
Verbal & Grammatical Forms	noun_plural_irreg	categories is to category as data is to	datum	information	0.62	0	{'information': 0.62, 'database': 0.03, 'object': 0.01, 'computer': 0.01, 'data': 0.01}	19	0.00367737	0.61351	0.999811	key	key|target	0.9	TRUE	TRUE	TRUE	target	{'datum': 0.9}
Semantic Relations	antonyms_binary	interior is to exterior as inverse is to	reverse	direct	0.61	0	{'direct': 0.61, 'inverse': 0.1, 'product': 0.02, 'reciprocal': 0.02, 'derivative': 0.01}	7	0.00811768	0.597351	0.99993	key	key|target	0.9	TRUE	TRUE	TRUE	target	{'reverse': 0.9}
Morphological Modifiers	re+verb_reg	redecorate is to decorate as redeem is to	deem	redeem	0.54	0	{'redeem': 0.54, 'ransom': 0.04, 're': 0.03, '__': 0.03, 'deliver': 0.02}	83	0.000740051	0.542229	0.999173	key	key|target	0.9	TRUE	TRUE	TRUE	target	{'deem': 0.9}
Morphological Modifiers	re+verb_reg	decorate is to redecorate as deem is to	redeem	deem	0.52	0	{'deem': 0.52, 'de': 0.09, 'dem': 0.02, 'judge': 0.02, '': 0.01}	173	0.000255585	0.523182	0.998276	key	key|target	0.9	TRUE	TRUE	TRUE	target	{'redeem': 0.9}
Morphological Modifiers	re+verb_reg	decorate is to redecorate as establish is to	reestablish	establish	0.42	0	{'establish': 0.42, '': 0.03, 'found': 0.03, '__': 0.01}	53	0.00157166	0.420303	0.999472	key	key|target	0.9	TRUE	TRUE	TRUE	target	{'reestablish': 0.9}
Morphological Modifiers	re+verb_reg	calculate is to recalculate as grow is to	regrow	grow	0.4	0	{'grow': 0.4, 'shrink': 0.07, '______': 0.02, '__': 0.02, '': 0.02}	160	0.000379562	0.401964	0.998406	key	key|target	0.9	TRUE	TRUE	TRUE	target	{'regrow': 0.9}
Semantic Relations	antonyms_binary	anterior is to posterior as fall is to	rise	spring	0.4	0	{'spring': 0.4, 'winter': 0.14, '': 0.03, 'summer': 0.05}	6	0.0186768	0.379761	0.99994	key	key|target	0.9	TRUE	TRUE	TRUE	target	{'rise': 0.9}
Semantic Relations	male_female	father is to mother as tiger is to	tigress	lion	0.38	0	{'lion': 0.38, 'what': 0.1, 'tiger': 0.03, '______': 0.03, 'cub': 0.02}	584	3.09944e-05	0.376922	0.99418	key	key|target	0.9	TRUE	TRUE	TRUE	target	{'tigress': 0.9}
Semantic Hierarchies	hypernyms_misc	picture is to photo as brush is to	toothbrush	paint	0.32	0	{'paint': 0.32, 'brush': 0.05, '______': 0.04, '': 0.03, '__': 0.02}	144	0.00050354	0.323715	0.998565	key	key|target	0.9	TRUE	TRUE	TRUE	target	{'toothbrush': 0.9}
Morphological Modifiers	re+verb_reg	consider is to reconsider as develop is to	redevelop	develop	0.22	0	{'develop': 0.22, 'development': 0.06, '______': 0.03, 'evolve': 0.03, '': 0.02}	27	0.00512695	0.213623	0.999731	key	key|target	0.9	TRUE	TRUE	TRUE	target	{'redevelop': 0.9}
Semantic Hierarchies	hyponyms_misc	bunk is to bed as toothbrush is to	brush	tooth	0.22	0	{'tooth': 0.22, '______': 0.07, '____': 0.04, '?': 0.04, '': 0.04}	12	0.0220947	0.193726	0.99988	key	key|target	0.9	TRUE	TRUE	TRUE	target	{'brush': 0.9}
Factual Knowledge	UK_city_county	lancaster is to lancashire as newport is to	gwent	w	0.21	0	{'w': 0.21, 'mon': 0.1, 'south': 0.07, 'som': 0.06, 'which': 0.05}	137	0.000339508	0.208645	0.998635	key	key|target	0.9	TRUE	TRUE	TRUE	target	{'gwent': 0.9}
Semantic Hierarchies	hypernyms_misc	fruit is to peach as brush is to	toothbrush	paint	0.14	0	{'paint': 0.14, '?': 0.09, '': 0.03, '______': 0.04}	77	0.00111389	0.136581	0.999233	key	key|target	0.9	TRUE	TRUE	TRUE	target	{'toothbrush': 0.9}
Semantic Hierarchies	hypernyms_misc	fruit is to plum as brush is to	toothbrush	?	0.14	0	{'?': 0.05, '': 0.05, 'paint': 0.07}	96	0.000682831	0.137989	0.999043	key	key|target	0.9	TRUE	TRUE	TRUE	target	{'toothbrush': 0.9}
Semantic Hierarchies	hypernyms_misc	cake is to dessert as vase is to	jar	flower	0.14	0	{'flower': 0.14, '?': 0.04, '__': 0.04, 'what': 0.03}	324	8.05855e-05	0.141521	0.996771	key	key|target	0.9	TRUE	TRUE	TRUE	target	{'jar': 0.9}
Semantic Relations	antonyms_binary	occupied is to vacant as under is to	over	?	0.14	0	{'?': 0.05, 'above': 0.07, '': 0.06, 'below': 0.05}	7	0.0380859	0.103516	0.99993	key	key|target	0.9	TRUE	TRUE	TRUE	target	{'over': 0.9}
Semantic Hierarchies	hypernyms_misc	blender is to appliance as denim is to	fabric	clothing	0.13	0	{'clothing': 0.13, '': 0.04, '?': 0.06, ':': 0.06}	7	0.0202637	0.111572	0.99993	key	key|target	0.9	TRUE	TRUE	TRUE	target	{'fabric': 0.9}
Semantic Hierarchies	hypernyms_misc	journal is to diary as makeup is to	mascara	cosmetics	0.12	0	{'cosmetics': 0.12, '______': 0.05, '__': 0.05, 'what': 0.04, 'lipstick': 0.03}	21	0.00952148	0.114014	0.999791	key	key|target	0.9	TRUE	TRUE	TRUE	target	{'mascara': 0.9}
Semantic Relations	animal_sound	bray is to donkey as chirrup is to	songbird		0.12	0	{'': 0.04, ':': 0.05, '______': 0.04}	213	0.000274658	0.124725	0.997877	key	key|target	0.9	TRUE	TRUE	TRUE	target	{'songbird': 0.9}
Semantic Relations	antonyms_gradable	aware is to unaware as generous is to	stingy		0.12	0	{'': 0.04, '?': 0.07, '______': 0.06, 'miser': 0.03}	6	0.0301514	0.0894775	0.99994	key	key|target	0.9	TRUE	TRUE	TRUE	target	{'stingy': 0.9}
Morphological Modifiers	verb+tion_irreg	computation is to compute as preparation is to	prepare	experiment	0.11	0	{'experiment': 0.11, 'action': 0.1, 'performance': 0.07, 'measurement': 0.06, 'play': 0.05}	68	0.00135803	0.110458	0.999322	key	key|target	0.9	TRUE	TRUE	TRUE	target	{'prepare': 0.9}
Semantic Hierarchies	hyponyms_misc	paperback is to book as toothbrush is to	brush	tooth	0.11	0	{'tooth': 0.11, '"': 0.06, '____': 0.04, '': 0.04, '______': 0.03}	15	0.0163574	0.0974121	0.999851	key	key|target	0.9	TRUE	TRUE	TRUE	target	{'brush': 0.9}
Semantic Relations	animal_sound	hiss is to snake as chirrup is to	songbird	bird	0.11	0	{'bird': 0.11, '': 0.05, ':': 0.05, '______': 0.04}	148	0.000553131	0.108334	0.998525	key	key|target	0.9	TRUE	TRUE	TRUE	target	{'songbird': 0.9}
Factual Knowledge	capital_world	Ireland is to Dublin as Oman is to	muscat	____	0.1	0	{'____': 0.1, '__': 0.1, '______': 0.07, '_____': 0.07, '___': 0.06}	9	0.0234375	0.081543	0.99991	key	key|target	0.9	TRUE	TRUE	TRUE	target	{'muscat': 0.9}
Morphological Modifiers	noun+less_reg	bone is to boneless as wit is to	witless	______	0.1	0	{'______': 0.1, 'humor': 0.1, 'wisdom': 0.05, '__': 0.05, '____': 0.04}	6	0.0256348	0.0759277	0.99994	key	key|target	0.9	TRUE	TRUE	TRUE	target	{'witless': 0.9}
Semantic Relations	male_female	actor is to actress as ram is to	ewe	lamb	0.1	0	{'lamb': 0.1, 'ram': 0.08, '?': 0.05, 'what': 0.05}	3045	4.08292e-06	0.103023	0.969657	key	key|target	0.9	TRUE	TRUE	TRUE	target	{'ewe': 0.9}
Semantic Relations	family	son is to daughter as grandson is to	granddaughter	:	0.09	0	{':': 0.07, '______': 0.05, '__': 0.04, 'what': 0.04}	10	0.0336914	0.0605469	0.9999	key	key|target	0.9	TRUE	TRUE	TRUE	target	{'granddaughter': 0.9}
Semantic Hierarchies	hypernyms_misc	picture is to photo as card is to	postcard	____	0.08	0	{'____': 0.08, '__': 0.06, '______': 0.06, '_____': 0.05, '?': 0.02}	14	0.0135498	0.0640869	0.99986	key	key|target	0.9	TRUE	TRUE	TRUE	target	{'postcard': 0.9}
Morphological Modifiers	verb+tion_irreg	computation is to compute as inspiration is to	inspire	breathe	0.07	0	{'breathe': 0.07, 'pers': 0.05, 'art': 0.05, 'breath': 0.04, 'inspiration': 0.04}	13	0.0167236	0.0579834	0.99987	key	key|target	0.9	TRUE	TRUE	TRUE	target	{'inspire': 0.9}
Semantic Hierarchies	hyponyms_misc	bunk is to bed as lemon is to	citrus	lime	0.07	0	{'lime': 0.07, 'lemon': 0.07, 'what': 0.07, 'fruit': 0.06, '__': 0.04}	6	0.0297852	0.0371094	0.99994	key	key|target	0.9	TRUE	TRUE	TRUE	target	{'citrus': 0.9}
Semantic Relations	animal_sound	drone is to beetle as neigh is to	horse	br	0.07	0	{'br': 0.07, '': 0.04, '____': 0.05, '______': 0.05}	8	0.0218506	0.0455322	0.99992	key	key|target	0.9	TRUE	TRUE	TRUE	target	{'horse': 0.9}
Semantic Relations	animal_sound	elephant is to trumpet as elk is to	bellow		0.07	0	{'': 0.04, '?': 0.06, ':': 0.05, '"': 0.03}	184	0.000297546	0.0734329	0.998166	key	key|target	0.9	TRUE	TRUE	TRUE	target	{'bellow': 0.9}
Morphological Modifiers	verb+able_reg	afford is to affordable as execute is to	executable	______	0.06	0	{'______': 0.06, '': 0.04, 'execution': 0.04, '?': 0.04}	35	0.00546265	0.0533752	0.999651	key	key|target	0.9	TRUE	TRUE	TRUE	target	{'executable': 0.9}
Semantic Relations	male_female	policewoman is to policeman as madam is to	sir		0.06	0	{'': 0.06, '______': 0.06, 'what': 0.05, '_': 0.05, 'm': 0.04}	92	0.00128174	0.0568237	0.999083	key	key|target	0.9	TRUE	TRUE	TRUE	target	{'sir': 0.9}
Semantic Relations	animal_sound	bray is to alpaca as chirrup is to	songbird	______	0.05	0	{'______': 0.05, '__': 0.03, 'what': 0.03, '_____': 0.03, '____': 0.02}	105	0.00144958	0.0437164	0.998954	key	key|target	0.9	TRUE	TRUE	TRUE	target	{'songbird': 0.9}
Semantic Relations	male_female	fisherwoman is to fisherman as bitch is to	hound	dog	0.58	0	{'dog': 0.58, 'what': 0.05, '?': 0.02, '______': 0.02, 'man': 0.02}	1464	3.50177e-06	0.578121	0.985411	key	key|target	0.89	TRUE	TRUE	TRUE	target	{'hound': 0.89}
Morphological Modifiers	re+verb_reg	solve is to resolve as submit is to	resubmit	submit	0.5	0	{'submit': 0.5, 'commit': 0.13, 'admit': 0.07, 'permit': 0.06, 'sum': 0.03}	44	0.000545502	0.503361	0.999562	key	key|target	0.89	TRUE	TRUE	TRUE	target	{'resubmit': 0.89}
Morphological Modifiers	re+verb_reg	decorate is to redecorate as organize is to	reorganize	organize	0.5	0	{'organize': 0.5, '': 0.06, 'organization': 0.03, '?': 0.03, 'what': 0.03}	19	0.00494385	0.498962	0.999811	key	key|target	0.89	TRUE	TRUE	TRUE	target	{'reorganize': 0.89}
Semantic Relations	male_female	grandfather is to grandmother as tiger is to	tigress	lion	0.46	0	{'lion': 0.46, 'tiger': 0.05, 'what': 0.04, '______': 0.02, '__': 0.02}	802	2.6226e-05	0.457005	0.992008	key	key|target	0.89	TRUE	TRUE	TRUE	target	{'tigress': 0.89}
Morphological Modifiers	re+verb_reg	consider is to reconsider as locate is to	relocate	locate	0.45	0	{'locate': 0.45, 'find': 0.05, 'location': 0.04, '': 0.02, 'discover': 0.01}	13	0.00683594	0.442383	0.99987	key	key|target	0.89	TRUE	TRUE	TRUE	target	{'relocate': 0.89}
Factual Knowledge	country_capital	Iraq is to Baghdad as Georgia is to	tbilisi	Atlanta	0.42	0	{'Atlanta': 0.42, '______': 0.06, '__': 0.06, ':': 0.04, '?"': 0.02}	395	3.43323e-05	0.417934	0.996064	key	key|target	0.89	TRUE	TRUE	TRUE	target	{'tbilisi': 0.89}
Verbal & Grammatical Forms	noun_plural_irreg	category is to categories as policy is to	policies	politics	0.35	0	{'politics': 0.35, 'government': 0.08, 'politicians': 0.04, 'governments': 0.04, 'the': 0.03}	54	0.00146484	0.346191	0.999462	key	key|target	0.89	TRUE	TRUE	TRUE	target	{'policies': 0.89}
Morphological Modifiers	verb+tion_irreg	computation is to compute as maximization is to	maximize	optimization	0.28	0	{'optimization': 0.28, 'addition': 0.16, 'decision': 0.04, 'calculus': 0.03, 'utility': 0.03}	52	0.00163269	0.28157	0.999482	key	key|target	0.89	TRUE	TRUE	TRUE	target	{'maximize': 0.89}
Verbal & Grammatical Forms	noun_plural_irreg	county is to counties as wife is to	wives	husbands	0.25	0	{'husbands': 0.25, 'husband': 0.08, '______': 0.07, '__': 0.04, '____': 0.03}	6	0.0322266	0.212891	0.99994	key	key|target	0.89	TRUE	TRUE	TRUE	target	{'wives': 0.89}
Semantic Hierarchies	hypernyms_misc	diary is to journal as pie is to	pastry	cake	0.21	0	{'cake': 0.21, 'apple': 0.08, 'pie': 0.06, '__': 0.06, '______': 0.04}	10	0.0159912	0.19104	0.9999	key	key|target	0.89	TRUE	TRUE	TRUE	target	{'pastry': 0.89}
Semantic Relations	antonyms_binary	outside is to inside as sink is to	rise	faucet	0.2	0	{'faucet': 0.2, 'drain': 0.12, 'toilet': 0.05, '______': 0.03, '__': 0.03}	1693	1.46627e-05	0.195298	0.983129	key	key|target	0.89	TRUE	TRUE	TRUE	target	{'rise': 0.89}
Semantic Relations	opposite	honest is to dishonest as aware is to	unaware	______	0.16	0	{'______': 0.16, '_____': 0.06, '____': 0.05, '"': 0.04, '': 0.03}	5	0.0322266	0.131836	0.99995	key	key|target	0.89	TRUE	TRUE	TRUE	target	{'unaware': 0.89}
Factual Knowledge	UK_city_county	gloucester is to gloucestershire as newport is to	gwent	which	0.15	0	{'which': 0.15, 'new': 0.12, 'mon': 0.11, 'what': 0.09, 'w': 0.05}	275	5.67436e-05	0.146428	0.99726	key	key|target	0.89	TRUE	TRUE	TRUE	target	{'gwent': 0.89}
Factual Knowledge	capital_world	Sudan is to Khartoum as Philippines is to	manila	?	0.14	0	{'?': 0.12, '"': 0.08, '?"': 0.07, '______': 0.07}	8	0.0290527	0.109619	0.99992	key	key|target	0.89	TRUE	TRUE	TRUE	target	{'manila': 0.89}
Semantic Relations	antonyms_binary	front is to back as inverse is to	reverse	direct	0.14	0	{'direct': 0.14, 'product': 0.05, 'what': 0.05, '______': 0.04, '?': 0.03}	41	0.00372314	0.135925	0.999591	key	key|target	0.89	TRUE	TRUE	TRUE	target	{'reverse': 0.89}
Verbal & Grammatical Forms	plural	eyes is to eye as women is to	woman	men	0.14	0	{'men': 0.14, 'man': 0.12, '______': 0.06, '____': 0.04, '__': 0.03}	9	0.0235596	0.120972	0.99991	key	key|target	0.89	TRUE	TRUE	TRUE	target	{'woman': 0.89}
Semantic Hierarchies	hypernyms_misc	cake is to dessert as sidewalk is to	walk	city	0.13	0	{'city': 0.13, 'street': 0.11, 'road': 0.11, '?': 0.07, '______': 0.04}	18	0.00939941	0.120483	0.999821	key	key|target	0.89	TRUE	TRUE	TRUE	target	{'walk': 0.89}
Semantic Relations	animal_sound	alpaca is to bray as fox is to	howl	bark	0.13	0	{'bark': 0.13, 'y': 0.06, '__': 0.05, '_____': 0.05, '______': 0.04}	7	0.0222168	0.105713	0.99993	key	key|target	0.89	TRUE	TRUE	TRUE	target	{'howl': 0.89}
Factual Knowledge	capital_world	Gabon is to Libreville as Norway is to	oslo	?	0.12	0	{'?': 0.06, ':': 0.07, '______': 0.06}	10	0.0222168	0.0979004	0.9999	key	key|target	0.89	TRUE	TRUE	TRUE	target	{'oslo': 0.89}
Semantic Relations	animal_shelter	seal is to den as trout is to	river	salmon	0.12	0	{'salmon': 0.12, 'fish': 0.08, '': 0.07, '______': 0.05, '?': 0.04}	18	0.0108032	0.104919	0.999821	key	key|target	0.89	TRUE	TRUE	TRUE	target	{'river': 0.89}
Morphological Modifiers	verb+er_irreg	choreograph is to choreographer as receive is to	receiver		0.11	0	{'': 0.06, '?': 0.05, ':': 0.04}	8	0.0262451	0.0845947	0.99992	key	key|target	0.89	TRUE	TRUE	TRUE	target	{'receiver': 0.89}
Semantic Hierarchies	hypernyms_misc	toaster is to appliance as tub is to	container	?	0.11	0	{'?': 0.11, '?"': 0.08, '': 0.06, 'bathroom': 0.04, ':': 0.03}	187	0.000314713	0.105154	0.998137	key	key|target	0.89	TRUE	TRUE	TRUE	target	{'container': 0.89}
Semantic Relations	opposite	comfortable is to uncomfortable as aware is to	unaware	______	0.1	0	{'______': 0.1, 'aware': 0.08, '_____': 0.05, '__': 0.04, '': 0.04}	8	0.0217285	0.0817871	0.99992	key	key|target	0.89	TRUE	TRUE	TRUE	target	{'unaware': 0.89}
Semantic Relations	antonyms_gradable	energetic is to lethargic as generous is to	stingy	?	0.1	0	{'?': 0.05, '': 0.07, ':': 0.05}	10	0.0336914	0.0639648	0.9999	key	key|target	0.89	TRUE	TRUE	TRUE	target	{'stingy': 0.89}
Semantic Hierarchies	hypernyms_misc	postcard is to card as tub is to	container		0.09	0	{'': 0.05, ':': 0.04, '_____': 0.04, '?': 0.03}	80	0.0014801	0.0927582	0.999203	key	key|target	0.89	TRUE	TRUE	TRUE	target	{'container': 0.89}
Semantic Relations	animal_sound	ribbit is to frog as chirrup is to	songbird		0.09	0	{'': 0.07, ':': 0.07, '?': 0.06, '______': 0.05}	342	9.77516e-05	0.089746	0.996592	key	key|target	0.89	TRUE	TRUE	TRUE	target	{'songbird': 0.89}
Morphological Modifiers	re+verb_reg	reassure is to assure as redeem is to	deem	redeem	0.08	0	{'redeem': 0.08, '__': 0.05, '_____': 0.05, '______': 0.05, '': 0.04}	252	0.000268936	0.0788326	0.997489	key	key|target	0.89	TRUE	TRUE	TRUE	target	{'deem': 0.89}
Semantic Relations	antonyms_gradable	short is to tall as tasty is to	tasteless	"	0.07	0	{'"': 0.07, 'sour': 0.05, '______': 0.04, 'delicious': 0.03, '?"': 0.03}	73	0.00233459	0.0660248	0.999273	key	key|target	0.89	TRUE	TRUE	TRUE	target	{'tasteless': 0.89}
Semantic Hierarchies	hypernyms_misc	toiletry is to deodorant as fuel is to	gasoline	car	0.06	0	{'car': 0.06, 'what': 0.06, '______': 0.05, '': 0.05, 'a': 0.04}	11	0.0175781	0.0473633	0.99989	key	key|target	0.89	TRUE	TRUE	TRUE	target	{'gasoline': 0.89}
Semantic Relations	antonyms_binary	anterior is to posterior as drop is to	lift		0.06	0	{'': 0.06, '______': 0.05, '_____': 0.03, 'jump': 0.03, 'fall': 0.03}	7	0.0240479	0.0335693	0.99993	key	key|target	0.89	TRUE	TRUE	TRUE	target	{'lift': 0.89}
Semantic Relations	antonyms_gradable	bright is to pale as energetic is to	lethargic		0.06	0	{'': 0.06, 'tired': 0.05, '?': 0.05, 'lazy': 0.04, '______': 0.04}	7	0.0285645	0.0319824	0.99993	key	key|target	0.89	TRUE	TRUE	TRUE	target	{'lethargic': 0.89}
Semantic Relations	male_female	cow is to bull as murderess is to	murderer	______	0.06	0	{'______': 0.06, '____': 0.05, '__': 0.04, '': 0.04}	14	0.0235596	0.0404053	0.99986	key	key|target	0.89	TRUE	TRUE	TRUE	target	{'murderer': 0.89}
Morphological Modifiers	re+verb_reg	establish is to reestablish as generate is to	regenerate	generate	0.62	0	{'generate': 0.62, 'produce': 0.04, 'generator': 0.03, 'create': 0.03, 'generation': 0.03}	7	0.00799561	0.609192	0.99993	key	key|target	0.88	TRUE	TRUE	TRUE	target	{'regenerate': 0.88}
Morphological Modifiers	re+verb_reg	connect is to reconnect as generate is to	regenerate	generate	0.42	0	{'generate': 0.42, 'create': 0.07, 'generator': 0.03, '__': 0.02, 'produce': 0.02}	5	0.0198975	0.403931	0.99995	key	key|target	0.88	TRUE	TRUE	TRUE	target	{'regenerate': 0.88}
Semantic Hierarchies	hypernyms_misc	fruit is to plum as cream is to	sunscreen	milk	0.29	0	{'milk': 0.29, '______': 0.06, 'what': 0.06, '____': 0.05, '?': 0.04}	1443	6.02007e-06	0.287103	0.985621	key	key|target	0.88	TRUE	TRUE	TRUE	target	{'sunscreen': 0.88}
Morphological Modifiers	verb+tion_irreg	computation is to compute as specialization is to	specialize	general	0.27	0	{'general': 0.27, 'abstraction': 0.11, 'specialization': 0.06, 'instantiation': 0.02, 'gener': 0.02}	140	0.00056839	0.268963	0.998605	key	key|target	0.88	TRUE	TRUE	TRUE	target	{'specialize': 0.88}
Semantic Hierarchies	hypernyms_misc	blender is to appliance as gasoline is to	fuel	car	0.25	0	{'car': 0.25, 'automobile': 0.18, '______': 0.05, 'engine': 0.03, 'vehicle': 0.03}	8	0.0178223	0.228271	0.99992	key	key|target	0.88	TRUE	TRUE	TRUE	target	{'fuel': 0.88}
Factual Knowledge	UK_city_county	newcastle is to northumberland as newport is to	gwent	mon	0.2	0	{'mon': 0.2, 'som': 0.16, 'w': 0.06, 'glam': 0.05, 'south': 0.05}	109	0.000534058	0.195755	0.998914	key	key|target	0.88	TRUE	TRUE	TRUE	target	{'gwent': 0.88}
Semantic Hierarchies	hypernyms_misc	diary is to journal as notepad is to	pad	notebook	0.2	0	{'notebook': 0.2, 'not': 0.08, 'paper': 0.06, '__': 0.03, 'note': 0.03}	5	0.0253906	0.174805	0.99995	key	key|target	0.88	TRUE	TRUE	TRUE	target	{'pad': 0.88}
Semantic Hierarchies	hypernyms_misc	shirt is to clothes as tv is to	device	entertainment	0.18	0	{'entertainment': 0.18, '?': 0.07, 'electronics': 0.04, 'what': 0.03, '': 0.03}	205	0.00025177	0.183342	0.997957	key	key|target	0.88	TRUE	TRUE	TRUE	target	{'device': 0.88}
Semantic Hierarchies	hypernyms_misc	journal is to diary as band is to	wristband	orchestra	0.16	0	{'orchestra': 0.16, 'band': 0.05, 'chorus': 0.04, '?': 0.03, '____': 0.03}	392	0.000151634	0.156098	0.996094	key	key|target	0.88	TRUE	TRUE	TRUE	target	{'wristband': 0.88}
Verbal & Grammatical Forms	noun_plural_irreg	category is to categories as community is to	communities	individuals	0.16	0	{'individuals': 0.16, 'society': 0.15, 'people': 0.06, 'societies': 0.05, 'culture': 0.04}	6	0.0283203	0.134766	0.99994	key	key|target	0.88	TRUE	TRUE	TRUE	target	{'communities': 0.88}
Semantic Hierarchies	hypernyms_misc	deodorant is to toiletry as tub is to	container	bathroom	0.13	0	{'bathroom': 0.13, 'bath': 0.06, 'plumbing': 0.05, '?': 0.05, '?"': 0.04}	97	0.000999451	0.133766	0.999033	key	key|target	0.88	TRUE	TRUE	TRUE	target	{'container': 0.88}
Semantic Relations	male_female	empress is to emperor as madam is to	sir	gentleman	0.12	0	{'gentleman': 0.12, 'what': 0.08, '': 0.06, '?': 0.06}	19	0.0111694	0.109436	0.999811	key	key|target	0.88	TRUE	TRUE	TRUE	target	{'sir': 0.88}
Factual Knowledge	capital_world	Ghana is to Accra as Eritrea is to	asmara	?	0.11	0	{'?': 0.07, '': 0.06, '"': 0.04, 'what': 0.04}	11	0.0216064	0.0882568	0.99989	key	key|target	0.88	TRUE	TRUE	TRUE	target	{'asmara': 0.88}
Semantic Relations	antonyms_binary	ahead is to behind as southeast is to	southwest		0.11	0	{'': 0.05, '______': 0.08, '?': 0.05, '"': 0.04}	7	0.0378418	0.0715332	0.99993	key	key|target	0.88	TRUE	TRUE	TRUE	target	{'southwest': 0.88}
Factual Knowledge	country_capital	Afghanistan is to Kabul as Philippines is to	manila	______	0.09	0	{'______': 0.09, '': 0.06, '?': 0.07, '__': 0.05}	8	0.0444336	0.0498047	0.99992	key	key|target	0.88	TRUE	TRUE	TRUE	target	{'manila': 0.88}
Factual Knowledge	capital_world	Afghanistan is to Kabul as Philippines is to	manila	______	0.09	0	{'______': 0.09, '': 0.06, '?': 0.07, '__': 0.05}	8	0.0444336	0.0498047	0.99992	key	key|target	0.88	TRUE	TRUE	TRUE	target	{'manila': 0.88}
Semantic Hierarchies	hypernyms_misc	pin is to hairpin as container is to	tub	?	0.09	0	{'?': 0.09, 'box': 0.06, '': 0.05, ':': 0.04, 'what': 0.03}	211	0.000350952	0.0938873	0.997897	key	key|target	0.88	TRUE	TRUE	TRUE	target	{'tub': 0.88}
Verbal & Grammatical Forms	verb_inf_Ving	allow is to allowing as promote is to	promoting		0.09	0	{'': 0.05, '______': 0.08, '?': 0.04}	6	0.0314941	0.0539551	0.99994	key	key|target	0.88	TRUE	TRUE	TRUE	target	{'promoting': 0.88}
Morphological Modifiers	superlative	wide is to widest as tasty is to	tastiest	?	0.08	0	{'?': 0.08, '': 0.05, '______': 0.04, ':': 0.04}	6	0.0308838	0.0477295	0.99994	key	key|target	0.88	TRUE	TRUE	TRUE	target	{'tastiest': 0.88}
Semantic Hierarchies	hypernyms_misc	toiletry is to deodorant as jar is to	vase	:	0.08	0	{':': 0.08, '?': 0.07, '': 0.07, '____': 0.04, 'what': 0.04}	342	9.9659e-05	0.0790019	0.996592	key	key|target	0.88	TRUE	TRUE	TRUE	target	{'vase': 0.88}
Semantic Relations	animal_sound	coo is to pigeon as sing is to	whale		0.08	0	{'': 0.04, '?': 0.05, ':': 0.04, 'sing': 0.03}	268	0.00019455	0.0784187	0.997329	key	key|target	0.88	TRUE	TRUE	TRUE	target	{'whale': 0.88}
Semantic Relations	animal_sound	quack is to mallard as chirrup is to	songbird		0.08	0	{'': 0.06, ':': 0.06, '______': 0.06, '?': 0.04}	78	0.00158691	0.0794678	0.999223	key	key|target	0.88	TRUE	TRUE	TRUE	target	{'songbird': 0.88}
Semantic Relations	animal_sound	elk is to bellow as gorilla is to	grunt	__	0.08	0	{'__': 0.08, '': 0.07, '______': 0.05, '_____': 0.05, 'beat': 0.04}	22	0.010437	0.0691528	0.999781	key	key|target	0.88	TRUE	TRUE	TRUE	target	{'grunt': 0.88}
Semantic Relations	male_female	grandmother is to grandfather as madam is to	sir	gentleman	0.08	0	{'gentleman': 0.08, 'what': 0.08, '____': 0.05, '"': 0.04, '...': 0.04}	19	0.00964355	0.0738525	0.999811	key	key|target	0.88	TRUE	TRUE	TRUE	target	{'sir': 0.88}
Morphological Modifiers	adj+ness_reg	oddness is to odd as righteousness is to	righteous	justice	0.07	0	{'justice': 0.07, 'righteousness': 0.05, 'sin': 0.05, 'evil': 0.04, '______': 0.03}	25	0.00613403	0.0597839	0.999751	key	key|target	0.88	TRUE	TRUE	TRUE	target	{'righteous': 0.88}
Semantic Relations	animal_sound	drone is to beetle as moo is to	cattle	moo	0.07	0	{'moo': 0.07, 'cow': 0.06, '______': 0.05, '____': 0.05, '_____': 0.03}	134	0.00088501	0.0674744	0.998665	key	key|target	0.88	TRUE	TRUE	TRUE	target	{'cattle': 0.88}
Semantic Relations	animal_sound	alpaca is to bray as chimpanzee is to	scream	h	0.07	0	{'h': 0.07, '__': 0.07, '': 0.04, 'laugh': 0.04}	14	0.0159912	0.0513916	0.99986	key	key|target	0.88	TRUE	TRUE	TRUE	target	{'scream': 0.88}
Semantic Hierarchies	hypernyms_misc	furniture is to desk as jar is to	vase	____	0.06	0	{'____': 0.06, '?': 0.05, '______': 0.06, '': 0.06}	205	0.000244141	0.0622559	0.997957	key	key|target	0.88	TRUE	TRUE	TRUE	target	{'vase': 0.88}
Semantic Relations	animal_sound	alpaca is to bray as deer is to	bellow	______	0.06	0	{'______': 0.06, '_____': 0.04, '': 0.03, '____': 0.03}	146	0.000816345	0.0602188	0.998545	key	key|target	0.88	TRUE	TRUE	TRUE	target	{'bellow': 0.88}
Morphological Modifiers	re+verb_reg	decorate is to redecorate as solve is to	resolve	solve	0.39	0	{'solve': 0.39, 'problem': 0.08, 'solution': 0.06, 'puzzle': 0.04, '': 0.03}	11	0.00753784	0.379181	0.99989	key	key|target	0.87	TRUE	TRUE	TRUE	target	{'resolve': 0.87}
Semantic Relations	animal_sound	deer is to bellow as sheep is to	baa	ble	0.32	0	{'ble': 0.32, '______': 0.09, '_____': 0.07, '____': 0.05, '___': 0.04}	28	0.00338745	0.320831	0.999721	key	key|target	0.87	TRUE	TRUE	TRUE	target	{'baa': 0.87}
Factual Knowledge	capital_world	Copenhagen is to Denmark as Georgetown is to	guyana	Washington	0.3	0	{'Washington': 0.3, 'the': 0.21, 'D': 0.07, 'DC': 0.03, 'what': 0.03}	6	0.0227051	0.281982	0.99994	key	key|target	0.87	TRUE	TRUE	TRUE	target	{'guyana': 0.87}
Semantic Relations	antonyms_binary	off is to on as outward is to	upward	inward	0.29	0	{'inward': 0.29, '': 0.04, '?': 0.06, '"': 0.03}	109	0.00069809	0.290318	0.998914	key	key|target	0.87	TRUE	TRUE	TRUE	target	{'upward': 0.87}
Morphological Modifiers	re+verb_reg	decorate is to redecorate as learn is to	relearn	learn	0.25	0	{'learn': 0.25, 'study': 0.13, 'teach': 0.04, 'un': 0.03, '': 0.02}	13	0.00958252	0.238464	0.99987	key	key|target	0.87	TRUE	TRUE	TRUE	target	{'relearn': 0.87}
Semantic Hierarchies	hypernyms_misc	diary is to journal as skirt is to	clothes	dress	0.25	0	{'dress': 0.25, 'pants': 0.16, 'pant': 0.06, '______': 0.06, '____': 0.04}	145	0.000383377	0.246687	0.998555	key	key|target	0.87	TRUE	TRUE	TRUE	target	{'clothes': 0.87}
Semantic Hierarchies	hypernyms_misc	shirt is to clothes as vase is to	jar	?	0.25	0	{'?': 0.05, '': 0.06, 'flowers': 0.04, ':': 0.04}	233	0.00014782	0.246922	0.997678	key	key|target	0.87	TRUE	TRUE	TRUE	target	{'jar': 0.87}
Verbal & Grammatical Forms	noun_plural_irreg	families is to family as wives is to	wife	husbands	0.25	0	{'husbands': 0.25, 'husband': 0.17, '______': 0.06, '__': 0.04, '____': 0.03}	14	0.0109863	0.239014	0.99986	key	key|target	0.87	TRUE	TRUE	TRUE	target	{'wife': 0.87}
Factual Knowledge	UK_city_county	cambridge is to cambridgeshire as newport is to	gwent	new	0.24	0	{'new': 0.24, '?': 0.06, 'w': 0.06, 'what': 0.04, 'mon': 0.03}	344	6.91414e-05	0.242118	0.996572	key	key|target	0.87	TRUE	TRUE	TRUE	target	{'gwent': 0.87}
Factual Knowledge	name_nationality	lenin is to Soviet as maxwell is to	scottish	English	0.19	0	{'English': 0.19, 'British': 0.18, 'American': 0.16, 'american': 0.04, 'english': 0.04}	11	0.00842285	0.18396	0.99989	key	key|target	0.87	TRUE	TRUE	TRUE	target	{'scottish': 0.87}
Verbal & Grammatical Forms	noun_plural_reg	members is to member as roads is to	road	city	0.19	0	{'city': 0.19, 'town': 0.05, '______': 0.04, 'driver': 0.04, 'car': 0.04}	6	0.0253906	0.162109	0.99994	key	key|target	0.87	TRUE	TRUE	TRUE	target	{'road': 0.87}
Factual Knowledge	name_occupation	columbus is to explorer as michelangelo is to	sculptor	artist	0.18	0	{'artist': 0.18, '': 0.05, 'what': 0.04, ':': 0.03}	13	0.0186768	0.158081	0.99987	key	key|target	0.87	TRUE	TRUE	TRUE	target	{'sculptor': 0.87}
Semantic Relations	antonyms_gradable	big is to small as concerned is to	unconcerned	worried	0.18	0	{'worried': 0.18, 'concerned': 0.11, '______': 0.03, 'interested': 0.03, '__': 0.02}	17	0.00823975	0.168518	0.999831	key	key|target	0.87	TRUE	TRUE	TRUE	target	{'unconcerned': 0.87}
Morphological Modifiers	re+verb_reg	learn is to relearn as organize is to	reorganize	organize	0.16	0	{'organize': 0.16, '': 0.07, '?': 0.06, '______': 0.05, '__': 0.04}	11	0.0184326	0.136841	0.99989	key	key|target	0.87	TRUE	TRUE	TRUE	target	{'reorganize': 0.87}
Semantic Hierarchies	hypernyms_misc	furniture is to desk as fuel is to	gasoline	car	0.16	0	{'car': 0.16, 'what': 0.07, '______': 0.05, '?': 0.05, 'engine': 0.04}	112	0.000732422	0.162354	0.998884	key	key|target	0.87	TRUE	TRUE	TRUE	target	{'gasoline': 0.87}
Verbal & Grammatical Forms	noun_plural_irreg	stories is to story as women is to	woman	men	0.16	0	{'men': 0.16, 'man': 0.11, '______': 0.08, '____': 0.04, '__': 0.04}	8	0.0167236	0.141479	0.99992	key	key|target	0.87	TRUE	TRUE	TRUE	target	{'woman': 0.87}
Semantic Hierarchies	hypernyms_misc	hairpin is to pin as sunscreen is to	cream	sun	0.15	0	{'sun': 0.15, 'sunscreen': 0.08, 'protect': 0.06, 'lotion': 0.04, '______': 0.04}	30	0.00473022	0.141754	0.999701	key	key|target	0.87	TRUE	TRUE	TRUE	target	{'cream': 0.87}
Morphological Modifiers	adj_superlative	neatest is to neat as noisiest is to	noisy	quiet	0.13	0	{'quiet': 0.13, '______': 0.12, 'lou': 0.07, '_____': 0.05, '__': 0.04}	6	0.0339355	0.092041	0.99994	key	key|target	0.87	TRUE	TRUE	TRUE	target	{'noisy': 0.87}
Semantic Relations	antonyms_gradable	sour is to sweet as tasteless is to	tasty	"	0.13	0	{'"': 0.13, '______': 0.06, '_____': 0.04, 'salty': 0.04, '",': 0.03}	17	0.0139771	0.118835	0.999831	key	key|target	0.87	TRUE	TRUE	TRUE	target	{'tasty': 0.87}
Morphological Modifiers	verb+er_irreg	baker is to bake as sender is to	send	message	0.12	0	{'message': 0.12, 'receiver': 0.08, '______': 0.08, '_____': 0.04, '__': 0.04}	17	0.0109863	0.107178	0.999831	key	key|target	0.87	TRUE	TRUE	TRUE	target	{'send': 0.87}
Semantic Relations	antonyms_binary	vacant is to occupied as southwest is to	southeast		0.1	0	{'': 0.03, "''": 0.08, 'northeast': 0.04}	20	0.0113525	0.0838623	0.999801	key	key|target	0.87	TRUE	TRUE	TRUE	target	{'southeast': 0.87}
Verbal & Grammatical Forms	noun_plural_irreg	policies is to policy as women is to	woman	men	0.1	0	{'men': 0.1, '______': 0.07, 'women': 0.04, '__': 0.03, 'what': 0.03}	36	0.00367737	0.0973969	0.999641	key	key|target	0.87	TRUE	TRUE	TRUE	target	{'woman': 0.87}
Factual Knowledge	capital_world	Indonesia is to Jakarta as Sudan is to	khartoum	?	0.09	0	{'?': 0.09, '__': 0.08, 'what': 0.07, '______': 0.07, '____': 0.07}	6	0.0441895	0.0437012	0.99994	key	key|target	0.87	TRUE	TRUE	TRUE	target	{'khartoum': 0.87}
Morphological Modifiers	verb+able_reg	afford is to affordable as contain is to	containable	______	0.09	0	{'______': 0.09, '__': 0.06, '': 0.03, ':': 0.03}	16	0.0123901	0.0735474	0.999841	key	key|target	0.87	TRUE	TRUE	TRUE	target	{'containable': 0.87}
Semantic Hierarchies	hypernyms_misc	journal is to diary as pin is to	hairpin	______	0.09	0	{'______': 0.09, '____': 0.07, '_____': 0.05, '__': 0.04, '___': 0.04}	126	0.000904083	0.08601	0.998744	key	key|target	0.87	TRUE	TRUE	TRUE	target	{'hairpin': 0.87}
Semantic Relations	animal_sound	drone is to beetle as oink is to	pig	_____	0.09	0	{'_____': 0.09, '______': 0.06, '____': 0.06, '': 0.05, '___': 0.04}	11	0.0219727	0.0708008	0.99989	key	key|target	0.87	TRUE	TRUE	TRUE	target	{'pig': 0.87}
Semantic Relations	male_female	father is to mother as sir is to	madam	what	0.09	0	{'what': 0.09, '____': 0.06, 'lady': 0.06, '?': 0.05, '...': 0.05}	6	0.0332031	0.0595703	0.99994	key	key|target	0.87	TRUE	TRUE	TRUE	target	{'madam': 0.87}
Morphological Modifiers	comparative	long is to longer as cheap is to	cheaper		0.08	0	{'': 0.05, '?': 0.07, ':': 0.06, 'A': 0.05}	10	0.0280762	0.0529785	0.9999	key	key|target	0.87	TRUE	TRUE	TRUE	target	{'cheaper': 0.87}
Semantic Hierarchies	hypernyms_misc	pie is to pastry as vase is to	jar		0.08	0	{'': 0.04, '?': 0.07, ':': 0.06, '__': 0.04}	137	0.000518799	0.0815125	0.998635	key	key|target	0.87	TRUE	TRUE	TRUE	target	{'jar': 0.87}
Semantic Relations	antonyms_gradable	abundant is to scarce as energetic is to	lethargic		0.08	0	{'': 0.08, 'sluggish': 0.08, '______': 0.05, 'lazy': 0.05, '?': 0.04}	7	0.0289307	0.0545654	0.99993	key	key|target	0.87	TRUE	TRUE	TRUE	target	{'lethargic': 0.87}
Semantic Relations	animal_sound	alpaca is to bray as beetle is to	drone	______	0.06	0	{'______': 0.06, 'buzz': 0.05, '__': 0.04, '_____': 0.03, 'what': 0.03}	15	0.00909424	0.0502319	0.999851	key	key|target	0.87	TRUE	TRUE	TRUE	target	{'drone': 0.87}
Semantic Relations	male_female	batwoman is to batman as madam is to	sir	mon	0.06	0	{'mon': 0.06, 'master': 0.05, 'what': 0.05, 'm': 0.04, '...': 0.03}	11	0.0134888	0.046814	0.99989	key	key|target	0.87	TRUE	TRUE	TRUE	target	{'sir': 0.87}
Verbal & Grammatical Forms	noun_plural_irreg	county is to counties as majority is to	majorities	______	0.06	0	{'______': 0.06, 'minorities': 0.06, '': 0.05, '?': 0.05, '"': 0.03}	10	0.0275879	0.034668	0.9999	key	key|target	0.87	TRUE	TRUE	TRUE	target	{'majorities': 0.87}
Semantic Hierarchies	hyponyms_misc	bunk is to bed as teacup is to	cup	tea	0.06	0	{'tea': 0.06, '': 0.05, '______': 0.05, ':': 0.05, '_': 0.04}	14	0.0218506	0.041626	0.99986	greedy	pair_values|target	0.87	TRUE	TRUE	TRUE	target	{'cup': 0.87}
Semantic Relations	male_female	empress is to emperor as bitch is to	hound	dog	0.83	0	{'dog': 0.83, 'what': 0.02, 'stud': 0.01, 'king': 0.01, '': 0.01}	1923	1.2517e-06	0.83203	0.980837	key	key|target	0.86	TRUE	TRUE	TRUE	target	{'hound': 0.86}
Semantic Relations	antonyms_binary	output is to input as upward is to	outward	downward	0.64	0	{'downward': 0.64, 'down': 0.14, 'upward': 0.01, 'downwards': 0.01, 'downhill': 0.01}	11	0.00340271	0.633316	0.99989	key	key|target	0.86	TRUE	TRUE	TRUE	target	{'outward': 0.86}
Factual Knowledge	country_capital	Canberra is to Australia as Manila is to	philippines	the	0.57	0	{'the': 0.57, '______': 0.08, '__': 0.05, '___': 0.03, 'what': 0.03}	8	0.0151978	0.555115	0.99992	key	key|target	0.86	TRUE	TRUE	TRUE	target	{'philippines': 0.86}
Factual Knowledge	capital_world	Canberra is to Australia as Manila is to	philippines	the	0.57	0	{'the': 0.57, '______': 0.08, '__': 0.05, '___': 0.03, 'what': 0.03}	8	0.0151978	0.555115	0.99992	key	key|target	0.86	TRUE	TRUE	TRUE	target	{'philippines': 0.86}
Morphological Modifiers	re+verb_reg	readjust is to adjust as redeem is to	deem	redeem	0.43	0	{'redeem': 0.43, 'ransom': 0.03, 'deliver': 0.02, 'rem': 0.02, '__': 0.02}	129	0.000486374	0.427248	0.998715	key	key|target	0.86	TRUE	TRUE	TRUE	target	{'deem': 0.86}
Morphological Modifiers	re+verb_reg	decorate is to redecorate as generate is to	regenerate	generate	0.38	0	{'generate': 0.38, 'create': 0.05, 'produce': 0.04, '': 0.02, '__': 0.02}	12	0.00692749	0.371979	0.99988	key	key|target	0.86	TRUE	TRUE	TRUE	target	{'regenerate': 0.86}
Semantic Relations	animal_sound	dog is to bark as hornet is to	buzz	sting	0.37	0	{'sting': 0.37, '______': 0.06, '__': 0.04, '': 0.03, 'what': 0.03}	20	0.00735474	0.35788	0.999801	key	key|target	0.86	TRUE	TRUE	TRUE	target	{'buzz': 0.86}
Semantic Relations	antonyms_binary	beginning is to end as inverse is to	reverse	direct	0.37	0	{'direct': 0.37, 'inverse': 0.06, 'ob': 0.06, 'reciprocal': 0.05, 'opposite': 0.03}	8	0.0144043	0.356689	0.99992	key	key|target	0.86	TRUE	TRUE	TRUE	target	{'reverse': 0.86}
Morphological Modifiers	re+verb_reg	examine is to reexamine as upload is to	reupload	upload	0.28	0	{'upload': 0.28, 'download': 0.15, '': 0.03, '?': 0.03}	8	0.0169678	0.266235	0.99992	key	key|target	0.86	TRUE	TRUE	TRUE	target	{'reupload': 0.86}
Semantic Relations	animal_sound	ferret is to dook as songbird is to	chirrup	sing	0.27	0	{'sing': 0.27, '_____': 0.05, '______': 0.05, '__': 0.05, '___': 0.04}	12	0.0169678	0.248657	0.99988	key	key|target	0.86	TRUE	TRUE	TRUE	target	{'chirrup': 0.86}
Morphological Modifiers	over+adj_reg	represented is to overrepresented as stretched is to	overstretched	compressed	0.24	0	{'compressed': 0.24, 'squ': 0.19, 'squeezed': 0.09, 'stretched': 0.05, 'shr': 0.05}	26	0.00367737	0.23851	0.999741	key	key|target	0.86	TRUE	TRUE	TRUE	target	{'overstretched': 0.86}
Morphological Modifiers	re+verb_reg	emerge is to reemerge as locate is to	relocate	find	0.24	0	{'find': 0.24, 'locate': 0.18, 'where': 0.04, 'located': 0.02, 'location': 0.02}	31	0.00271606	0.233612	0.999691	key	key|target	0.86	TRUE	TRUE	TRUE	target	{'relocate': 0.86}
Semantic Relations	animal_sound	hiss is to snake as sing is to	whale	bird	0.23	0	{'bird': 0.23, '______': 0.06, '': 0.04, '_____': 0.04, '___': 0.03}	167	0.000362396	0.2262	0.998336	key	key|target	0.86	TRUE	TRUE	TRUE	target	{'whale': 0.86}
Morphological Modifiers	superlative	dark is to darkest as weak is to	weakest	strongest	0.2	0	{'strongest': 0.2, '______': 0.1, 'strong': 0.07, 'what': 0.05, '_____': 0.04}	5	0.0422363	0.158936	0.99995	key	key|target	0.86	TRUE	TRUE	TRUE	target	{'weakest': 0.86}
Morphological Modifiers	noun+less_reg	bone is to boneless as guilt is to	guiltless	innocence	0.2	0	{'innocence': 0.2, '______': 0.09, '__': 0.05, 'blame': 0.04, 'innocent': 0.04}	6	0.0332031	0.169922	0.99994	key	key|target	0.86	TRUE	TRUE	TRUE	target	{'guiltless': 0.86}
Semantic Hierarchies	hypernyms_misc	fuel is to gasoline as net is to	hairnet	gross	0.18	0	{'gross': 0.18, 'the': 0.04, 'net': 0.04, 'TV': 0.02, 'cable': 0.02}	231	0.0004673	0.176291	0.997698	key	key|target	0.86	TRUE	TRUE	TRUE	target	{'hairnet': 0.86}
Semantic Hierarchies	hypernyms_misc	perfume is to toiletry as tub is to	container	bathroom	0.15	0	{'bathroom': 0.15, 'bath': 0.07, 'bathtub': 0.05, '__': 0.04, '______': 0.04}	67	0.00170898	0.152588	0.999332	key	key|target	0.86	TRUE	TRUE	TRUE	target	{'container': 0.86}
Semantic Relations	antonyms_binary	off is to on as southeast is to	southwest		0.15	0	{'': 0.05, '?': 0.1, '"': 0.05, 'north': 0.05}	11	0.0201416	0.128296	0.99989	key	key|target	0.86	TRUE	TRUE	TRUE	target	{'southwest': 0.86}
Morphological Modifiers	verb+tion_irreg	computation is to compute as utilization is to	utilize	use	0.14	0	{'use': 0.14, 'consumption': 0.09, 'utility': 0.04, 'employment': 0.03, 'energy': 0.03}	27	0.00411987	0.132599	0.999731	key	key|target	0.86	TRUE	TRUE	TRUE	target	{'utilize': 0.86}
Semantic Hierarchies	hypernyms_misc	pin is to hairpin as sandwich is to	hamburger	bread	0.12	0	{'bread': 0.12, 'what': 0.08, '?': 0.06, '______': 0.05, '__': 0.03}	24	0.00897217	0.107727	0.999761	key	key|target	0.86	TRUE	TRUE	TRUE	target	{'hamburger': 0.86}
Semantic Hierarchies	hypernyms_misc	necklace is to jewelry as sunscreen is to	cream	what	0.11	0	{'what': 0.11, '______': 0.09, 'skin': 0.05, '____': 0.05, 'beach': 0.05}	605	3.50475e-05	0.10641	0.993971	key	key|target	0.86	TRUE	TRUE	TRUE	target	{'cream': 0.86}
Semantic Relations	animal_sound	bray is to alpaca as grunt is to	gorilla	pig	0.11	0	{'pig': 0.11, 'hog': 0.06, 'a': 0.04, 'bo': 0.03, '': 0.02}	82	0.00139618	0.109932	0.999183	key	key|target	0.86	TRUE	TRUE	TRUE	target	{'gorilla': 0.86}
Semantic Relations	animal_sound	roar is to lion as chirrup is to	songbird		0.11	0	{'': 0.06, '?': 0.08, ':': 0.08, 'what': 0.03}	368	9.39369e-05	0.105863	0.996333	key	key|target	0.86	TRUE	TRUE	TRUE	target	{'songbird': 0.86}
Semantic Relations	animal_sound	elephant is to trumpet as whale is to	sing		0.09	0	{'': 0.06, ':': 0.07, '?': 0.06, '_____': 0.05}	23	0.00952148	0.0837402	0.999771	key	key|target	0.86	TRUE	TRUE	TRUE	target	{'sing': 0.86}
Semantic Relations	animal_sound	dog is to bark as sheep is to	baa	______	0.08	0	{'______': 0.08, 'ble': 0.08, 'wool': 0.07, '_____': 0.07, '____': 0.04}	185	0.000417709	0.0845432	0.998156	key	key|target	0.86	TRUE	TRUE	TRUE	target	{'baa': 0.86}
Semantic Relations	animal_sound	alpaca is to bray as magpie is to	chatter	______	0.08	0	{'______': 0.08, 'squ': 0.07, '_____': 0.05, '__': 0.05, '____': 0.04}	5	0.0368652	0.0461426	0.99995	key	key|target	0.86	TRUE	TRUE	TRUE	target	{'chatter': 0.86}
Semantic Relations	animal_shelter	ape is to grove as mole is to	hole	bur	0.08	0	{'bur': 0.08, '_____': 0.07, '': 0.05, '?': 0.03}	21	0.0090332	0.0666504	0.999791	key	key|target	0.86	TRUE	TRUE	TRUE	target	{'hole': 0.86}
Semantic Relations	animal_sound	frog is to ribbit as sheep is to	baa	______	0.08	0	{'______': 0.08, '_____': 0.05, '?': 0.05, 'ble': 0.05, '': 0.05}	89	0.0010376	0.0785522	0.999113	key	key|target	0.86	TRUE	TRUE	TRUE	target	{'baa': 0.86}
Verbal & Grammatical Forms	noun_plural_irreg	cities is to city as women is to	woman	man	0.08	0	{'man': 0.08, '______': 0.05, 'men': 0.05, '_____': 0.04, '': 0.04}	8	0.0279541	0.0477295	0.99992	key	key|target	0.86	TRUE	TRUE	TRUE	target	{'woman': 0.86}
Semantic Hierarchies	hypernyms_misc	pastry is to food as tub is to	container	water	0.07	0	{'water': 0.07, '': 0.07, 'bath': 0.07, '?': 0.06, 'bathroom': 0.05}	134	0.000436783	0.0708523	0.998665	key	key|target	0.86	TRUE	TRUE	TRUE	target	{'container': 0.86}
Semantic Relations	male_female	dad is to mom as ram is to	ewe	?	0.07	0	{'?': 0.03, 'ram': 0.06, '____': 0.04, '___': 0.03}	32935	5.72763e-08	0.0688476	0.671805	key	key|target	0.86	TRUE	TRUE	TRUE	target	{'ewe': 0.86}
Semantic Hierarchies	hypernyms_misc	pin is to hairpin as food is to	pastry	______	0.06	0	{'______': 0.06, '__': 0.04, 'what': 0.04, '_____': 0.03, '____': 0.02}	875	8.82149e-05	0.0621676	0.991281	key	key|target	0.86	TRUE	TRUE	TRUE	target	{'pastry': 0.86}
Semantic Hierarchies	hypernyms_misc	photo is to picture as sidewalk is to	walk	?	0.06	0	{'?': 0.06, '______': 0.04, '_____': 0.04, 'road': 0.04, '': 0.04}	16	0.0169678	0.0460205	0.999841	key	key|target	0.86	TRUE	TRUE	TRUE	target	{'walk': 0.86}
Verbal & Grammatical Forms	noun_plural_irreg	category is to categories as opportunity is to	opportunities	choice	0.03	0	{'choice': 0.03, 'life': 0.03, 'possibility': 0.02, 'chance': 0.02, 'business': 0.02}	28	0.00479126	0.0284119	0.999721	key	key|target	0.86	TRUE	TRUE	TRUE	target	{'opportunities': 0.86}
Semantic Relations	male_female	grandmother is to grandfather as bitch is to	hound	dog	0.56	0	{'dog': 0.56, 'what': 0.03, 'mother': 0.03, '______': 0.02, '____': 0.02}	1223	8.40425e-06	0.562492	0.987813	key	key|target	0.85	TRUE	TRUE	TRUE	target	{'hound': 0.85}
Factual Knowledge	name_nationality	hegel is to German as maxwell is to	scottish	English	0.54	0	{'English': 0.54, 'British': 0.09, 'english': 0.07, 'American': 0.04, 'physics': 0.03}	5	0.0288086	0.51416	0.99995	key	key|target	0.85	TRUE	TRUE	TRUE	target	{'scottish': 0.85}
Morphological Modifiers	re+verb_reg	emerge is to reemerge as introduce is to	reintroduce	introduce	0.51	0	{'introduce': 0.51, 'present': 0.06, 'initiate': 0.01, 'bring': 0.01, 'insert': 0.01}	11	0.0067749	0.501038	0.99989	key	key|target	0.85	TRUE	TRUE	TRUE	target	{'reintroduce': 0.85}
Factual Knowledge	country_capital	Jamaica is to Kingston as Georgia is to	tbilisi	Atlanta	0.49	0	{'Atlanta': 0.49, '______': 0.04, '__': 0.04, ':': 0.02}	562	1.66893e-05	0.486311	0.9944	key	key|target	0.85	TRUE	TRUE	TRUE	target	{'tbilisi': 0.85}
Morphological Modifiers	re+verb_reg	examine is to reexamine as generate is to	regenerate	generate	0.46	0	{'generate': 0.46, 'create': 0.06, 'produce': 0.05, 'originate': 0.03, 'eng': 0.02}	6	0.0108643	0.452026	0.99994	key	key|target	0.85	TRUE	TRUE	TRUE	target	{'regenerate': 0.85}
Semantic Relations	animal_shelter	lion is to den as woodchuck is to	hole	bur	0.41	0	{'bur': 0.41, 'ground': 0.08, '': 0.04, 'm': 0.04}	10	0.0103149	0.401794	0.9999	key	key|target	0.85	TRUE	TRUE	TRUE	target	{'hole': 0.85}
Morphological Modifiers	re+verb_reg	decorate is to redecorate as occur is to	reoccur	occur	0.35	0	{'occur': 0.35, 'happen': 0.11, '': 0.05, 'recur': 0.03, 'take': 0.03}	23	0.00325012	0.348312	0.999771	key	key|target	0.85	TRUE	TRUE	TRUE	target	{'reoccur': 0.85}
Semantic Relations	antonyms_binary	exhale is to inhale as upward is to	outward	downward	0.32	0	{'downward': 0.32, '______': 0.06, '__': 0.05, '': 0.04, '____': 0.03}	41	0.00273132	0.313675	0.999591	key	key|target	0.85	TRUE	TRUE	TRUE	target	{'outward': 0.85}
Semantic Hierarchies	hypernyms_misc	journal is to diary as net is to	hairnet	web	0.3	0	{'web': 0.3, 'internet': 0.08, 'spider': 0.03, 'what': 0.03, '...': 0.02}	158	0.000362396	0.300419	0.998426	key	key|target	0.85	TRUE	TRUE	TRUE	target	{'hairnet': 0.85}
Morphological Modifiers	verb+tion_irreg	computation is to compute as illumination is to	illumine	light	0.29	0	{'light': 0.29, 'see': 0.09, 'the': 0.06, 'seeing': 0.04, 'illumination': 0.03}	32	0.00364685	0.285416	0.999681	key	key|target	0.85	TRUE	TRUE	TRUE	target	{'illumine': 0.85}
Factual Knowledge	UK_city_county	birmingham is to midlands as newport is to	gwent	south	0.23	0	{'south': 0.23, 'w': 0.18, 'mon': 0.03, '?': 0.02, 'what': 0.02}	520	4.17233e-05	0.228474	0.994818	key	key|target	0.85	TRUE	TRUE	TRUE	target	{'gwent': 0.85}
Factual Knowledge	capital_world	Baghdad is to Iraq as Georgetown is to	guyana	the	0.23	0	{'the': 0.23, 'Washington': 0.18, '______': 0.08, 'what': 0.05, 'D': 0.04}	137	0.000268936	0.229223	0.998635	key	key|target	0.85	TRUE	TRUE	TRUE	target	{'guyana': 0.85}
Verbal & Grammatical Forms	noun_plural_reg	languages is to language as roads is to	road	transportation	0.22	0	{'transportation': 0.22, 'city': 0.05, 'transport': 0.04, '______': 0.04, 'a': 0.04}	5	0.0339355	0.186768	0.99995	key	key|target	0.85	TRUE	TRUE	TRUE	target	{'road': 0.85}
Semantic Hierarchies	hypernyms_misc	appliance is to fridge as fuel is to	gasoline	car	0.21	0	{'car': 0.21, '?': 0.08, '': 0.06, '______': 0.04, '"': 0.03}	122	0.000602722	0.207405	0.998784	key	key|target	0.85	TRUE	TRUE	TRUE	target	{'gasoline': 0.85}
Semantic Relations	antonyms_binary	down is to up as inverse is to	reverse	direct	0.19	0	{'direct': 0.19, 'product': 0.08, 'what': 0.07, '?': 0.04, '?"': 0.03}	59	0.00202942	0.186447	0.999412	key	key|target	0.85	TRUE	TRUE	TRUE	target	{'reverse': 0.85}
Semantic Relations	animal_sound	bray is to alpaca as baa is to	sheep	?	0.17	0	{'?': 0.04, '': 0.04, ':': 0.06}	6	0.0324707	0.132568	0.99994	key	key|target	0.85	TRUE	TRUE	TRUE	target	{'sheep': 0.85}
Morphological Modifiers	re+verb_reg	assure is to reassure as install is to	reinstall	install	0.15	0	{'install': 0.15, '?': 0.04, '': 0.07, '______': 0.04}	20	0.00732422	0.144043	0.999801	key	key|target	0.85	TRUE	TRUE	TRUE	target	{'reinstall': 0.85}
Semantic Relations	antonyms_gradable	full is to empty as organized is to	unorganized		0.15	0	{'': 0.06, '?': 0.08, 'dis': 0.07, 'a': 0.02}	20	0.0090332	0.141357	0.999801	key	key|target	0.85	TRUE	TRUE	TRUE	target	{'unorganized': 0.85}
Semantic Hierarchies	hypernyms_misc	peach is to fruit as sunscreen is to	cream	skin	0.13	0	{'skin': 0.13, '_____': 0.07, '______': 0.07, 'beach': 0.06, 'sun': 0.06}	155	0.000383377	0.128523	0.998455	key	key|target	0.85	TRUE	TRUE	TRUE	target	{'cream': 0.85}
Semantic Hierarchies	hypernyms_misc	stapler is to device as vase is to	jar		0.13	0	{'': 0.03, '?': 0.1, ':': 0.03, 'flower': 0.03}	114	0.000770569	0.133018	0.998864	key	key|target	0.85	TRUE	TRUE	TRUE	target	{'jar': 0.85}
Semantic Hierarchies	hyponyms_misc	chapel is to church as lemon is to	citrus	fruit	0.12	0	{'fruit': 0.12, 'lemon': 0.1, 'lime': 0.06, '__': 0.05, 'orange': 0.05}	6	0.0336914	0.0913086	0.99994	key	key|target	0.85	TRUE	TRUE	TRUE	target	{'citrus': 0.85}
Morphological Modifiers	verb+ment_irreg	improvement is to improve as reinforcement is to	reinforce	punishment	0.11	0	{'punishment': 0.11, 'reward': 0.07, 'strengthen': 0.06, 'punish': 0.05, 'habit': 0.04}	5	0.0351562	0.0732422	0.99995	key	key|target	0.85	TRUE	TRUE	TRUE	target	{'reinforce': 0.85}
Semantic Hierarchies	hyponyms_misc	camcorder is to camera as bracelet is to	jewelry		0.11	0	{'': 0.03, 'wrist': 0.08, 'watch': 0.08, '__': 0.04}	66	0.0016098	0.107765	0.999342	key	key|target	0.85	TRUE	TRUE	TRUE	target	{'jewelry': 0.85}
Semantic Relations	animal_shelter	crocodile is to river as mole is to	hole		0.11	0	{'': 0.07, '_____': 0.05, 'hill': 0.04, '?': 0.03}	62	0.0019989	0.110794	0.999382	key	key|target	0.85	TRUE	TRUE	TRUE	target	{'hole': 0.85}
Morphological Modifiers	verb+ment_irreg	disagreement is to disagree as investment is to	invest	speculation	0.1	0	{'speculation': 0.1, 'spending': 0.05, 'expenditure': 0.05, 'saving': 0.04, 'risk': 0.04}	50	0.00193787	0.0971832	0.999502	key	key|target	0.85	TRUE	TRUE	TRUE	target	{'invest': 0.85}
Semantic Relations	animal_shelter	fox is to den as herring is to	sea		0.1	0	{'': 0.05, '_____': 0.06, '?': 0.05, '______': 0.05}	82	0.00121307	0.101814	0.999183	key	key|target	0.85	TRUE	TRUE	TRUE	target	{'sea': 0.85}
Semantic Relations	antonyms_binary	after is to before as drop is to	lift	fall	0.09	0	{'fall': 0.09, '': 0.03, '_____': 0.03, '?': 0.03, 'what': 0.03}	19	0.0106201	0.0841064	0.999811	key	key|target	0.85	TRUE	TRUE	TRUE	target	{'lift': 0.85}
Semantic Hierarchies	hypernyms_misc	diary is to journal as dishwasher is to	appliance	______	0.08	0	{'______': 0.08, 'dish': 0.06, '__': 0.06, '': 0.03, 'dishwasher': 0.03}	18	0.0126343	0.069397	0.999821	key	key|target	0.85	TRUE	TRUE	TRUE	target	{'appliance': 0.85}
Morphological Modifiers	adj+ness_reg	directedness is to directed as uniqueness is to	unique	uniqueness	0.07	0	{'uniqueness': 0.07, 'non': 0.05, 'universal': 0.03, '______': 0.03, '__': 0.03}	9	0.0167236	0.0535889	0.99991	key	key|target	0.85	TRUE	TRUE	TRUE	target	{'unique': 0.85}
Semantic Relations	antonyms_gradable	common is to rare as energetic is to	lethargic	lazy	0.07	0	{'lazy': 0.07, 'energetic': 0.04, 'calm': 0.03, 'sluggish': 0.03, '______': 0.03}	6	0.0174561	0.0557861	0.99994	key	key|target	0.85	TRUE	TRUE	TRUE	target	{'lethargic': 0.85}
Morphological Modifiers	noun+less_reg	arm is to armless as expression is to	expressionless	______	0.06	0	{'______': 0.06, '__': 0.05, '': 0.05, '?': 0.04}	5	0.0368652	0.0241699	0.99995	key	key|target	0.85	TRUE	TRUE	TRUE	target	{'expressionless': 0.85}
Semantic Hierarchies	hypernyms_misc	toiletry is to deodorant as card is to	postcard	____	0.06	0	{'____': 0.06, '__': 0.05, '?': 0.04, 'what': 0.04, '______': 0.04}	54	0.00189972	0.0630417	0.999462	key	key|target	0.85	TRUE	TRUE	TRUE	target	{'postcard': 0.85}
Semantic Hierarchies	hypernyms_misc	dessert is to cake as container is to	tub	"	0.04	0	{'"': 0.04, ':': 0.04, '?': 0.03, 'box': 0.03, 'what': 0.03}	178	0.000507355	0.0439262	0.998226	key	key|target	0.85	TRUE	TRUE	TRUE	target	{'tub': 0.85}
Morphological Modifiers	re+verb_reg	create is to recreate as establish is to	reestablish	establish	0.57	0	{'establish': 0.57, 'set': 0.05, 'create': 0.05, 'settle': 0.03, 'institute': 0.03}	6	0.0133667	0.556946	0.99994	key	key|target	0.84	TRUE	TRUE	TRUE	target	{'reestablish': 0.84}
Semantic Relations	male_female	poetess is to poet as mare is to	stallion	horse	0.54	0	{'horse': 0.54, '____': 0.05, '_____': 0.04, '______': 0.03, '_': 0.03}	5	0.0220947	0.513062	0.99995	key	key|target	0.84	TRUE	TRUE	TRUE	target	{'stallion': 0.84}
Morphological Modifiers	verb+tion_irreg	computation is to compute as imagination is to	imagine	perception	0.51	0	{'perception': 0.51, 'perceive': 0.06, 'reality': 0.02, 'sense': 0.02, 'dreaming': 0.02}	76	0.000694275	0.507118	0.999243	key	key|target	0.84	TRUE	TRUE	TRUE	target	{'imagine': 0.84}
Verbal & Grammatical Forms	verb_inf_Ved	followed is to follow as related is to	relate	related	0.47	0	{'related': 0.47, '______': 0.05, 'relative': 0.04, '____': 0.03, '_____': 0.02}	15	0.00631714	0.464386	0.999851	key	key|target	0.84	TRUE	TRUE	TRUE	target	{'relate': 0.84}
Semantic Relations	family	his is to her as nephew is to	niece	uncle	0.44	0	{'uncle': 0.44, 'aunt': 0.08, 'his': 0.07, 'her': 0.04, 'mother': 0.04}	7	0.0256348	0.415771	0.99993	key	key|target	0.84	TRUE	TRUE	TRUE	target	{'niece': 0.84}
Semantic Relations	antonyms_binary	dead is to alive as inverse is to	reverse	direct	0.43	0	{'direct': 0.43, 'product': 0.07, 'what': 0.04, 'inverse': 0.03, 'normal': 0.02}	25	0.00457764	0.421204	0.999751	key	key|target	0.84	TRUE	TRUE	TRUE	target	{'reverse': 0.84}
Semantic Hierarchies	hypernyms_misc	shelf is to furniture as vase is to	jar	?	0.37	0	{'?': 0.02, '': 0.07, ':': 0.04}	487	2.51532e-05	0.369115	0.995147	key	key|target	0.84	TRUE	TRUE	TRUE	target	{'jar': 0.84}
Morphological Modifiers	re+verb_reg	unite is to reunite as upload is to	reupload	upload	0.34	0	{'upload': 0.34, 'download': 0.12, '': 0.03, '__': 0.03}	25	0.00421143	0.331726	0.999751	key	key|target	0.84	TRUE	TRUE	TRUE	target	{'reupload': 0.84}
Morphological Modifiers	adj+ly_reg	sexually is to sexual as strongly is to	strong	weak	0.31	0	{'weak': 0.31, 'strongly': 0.07, '______': 0.05, '_____': 0.03, 'slightly': 0.03}	20	0.0067749	0.299866	0.999801	key	key|target	0.84	TRUE	TRUE	TRUE	target	{'strong': 0.84}
Semantic Hierarchies	hypernyms_misc	blender is to appliance as vase is to	jar		0.23	0	{'': 0.04, '?': 0.05}	77	0.00094986	0.224636	0.999233	key	key|target	0.84	TRUE	TRUE	TRUE	target	{'jar': 0.84}
Morphological Modifiers	verb+tion_irreg	computation is to compute as installation is to	install	architecture	0.18	0	{'architecture': 0.18, 'construction': 0.1, 'art': 0.1, 'building': 0.05, 'build': 0.04}	15	0.00787354	0.171814	0.999851	key	key|target	0.84	TRUE	TRUE	TRUE	target	{'install': 0.84}
Morphological Modifiers	over+adj_reg	played is to overplayed as qualified is to	overqualified	______	0.17	0	{'______': 0.17, 'un': 0.1, '__': 0.06, '_____': 0.04, 'what': 0.03}	6	0.0300293	0.142822	0.99994	key	key|target	0.84	TRUE	TRUE	TRUE	target	{'overqualified': 0.84}
Semantic Relations	male_female	groom is to bride as sir is to	madam	lady	0.17	0	{'lady': 0.17, '______': 0.08, 'what': 0.06, '____': 0.04, '__': 0.04}	5	0.0250244	0.148804	0.99995	key	key|target	0.84	TRUE	TRUE	TRUE	target	{'madam': 0.84}
Verbal & Grammatical Forms	verb_inf_Ved	ensure is to ensured as improve is to	improved		0.17	0	{'': 0.07, '______': 0.08, '?': 0.07, '__': 0.04}	15	0.0135498	0.151489	0.999851	key	key|target	0.84	TRUE	TRUE	TRUE	target	{'improved': 0.84}
Semantic Hierarchies	hyponyms_misc	sneakers is to shoes as jeans is to	trousers	clothes	0.16	0	{'clothes': 0.16, 'pants': 0.13, 'clothing': 0.06, 'what': 0.06, '': 0.03}	16	0.0110474	0.151062	0.999841	key	key|target	0.84	TRUE	TRUE	TRUE	target	{'trousers': 0.84}
Semantic Hierarchies	hypernyms_misc	book is to notebook as jar is to	vase	jar	0.15	0	{'jar': 0.15, '?': 0.07, ':': 0.07, '': 0.05, 'what': 0.04}	316	0.000103951	0.153216	0.996851	key	key|target	0.84	TRUE	TRUE	TRUE	target	{'vase': 0.84}
Morphological Modifiers	verb+ment_irreg	agreement is to agree as embarrassment is to	embarrass	shame	0.14	0	{'shame': 0.14, 'embarrassment': 0.07, 'ashamed': 0.05, 'being': 0.04, 'bl': 0.03}	11	0.0118408	0.13269	0.99989	key	key|target	0.84	TRUE	TRUE	TRUE	target	{'embarrass': 0.84}
Semantic Relations	antonyms_binary	above is to below as sink is to	rise	drain	0.14	0	{'drain': 0.14, 'faucet': 0.05, 'water': 0.05, 'toilet': 0.03, 'source': 0.02}	637	0.000134468	0.14342	0.993652	key	key|target	0.84	TRUE	TRUE	TRUE	target	{'rise': 0.84}
Morphological Modifiers	adj+ness_reg	preparedness is to prepared as usefulness is to	useful	______	0.12	0	{'______': 0.12, '__': 0.05, ':': 0.05, '': 0.04}	13	0.0180664	0.0996094	0.99987	key	key|target	0.84	TRUE	TRUE	TRUE	target	{'useful': 0.84}
Semantic Hierarchies	hypernyms_misc	pin is to hairpin as makeup is to	mascara	face	0.12	0	{'face': 0.12, '______': 0.05, 'what': 0.05, 'beauty': 0.04, '__': 0.04}	43	0.00294495	0.122055	0.999572	key	key|target	0.84	TRUE	TRUE	TRUE	target	{'mascara': 0.84}
Semantic Hierarchies	hypernyms_misc	journal is to diary as pad is to	notepad		0.12	0	{'': 0.07, '_____': 0.05, '______': 0.04, '"': 0.04}	37	0.00476074	0.110474	0.999631	key	key|target	0.84	TRUE	TRUE	TRUE	target	{'notepad': 0.84}
Semantic Relations	antonyms_binary	front is to back as southeast is to	southwest		0.12	0	{'': 0.05, '?': 0.1, ':': 0.06, '"': 0.04}	17	0.0145264	0.107056	0.999831	key	key|target	0.84	TRUE	TRUE	TRUE	target	{'southwest': 0.84}
Morphological Modifiers	over+adj_reg	overprotective is to protective as overwritten is to	written	______	0.11	0	{'______': 0.11, '"': 0.04, '____': 0.03, '__': 0.03, 'what': 0.03}	22	0.00848389	0.101868	0.999781	key	key|target	0.84	TRUE	TRUE	TRUE	target	{'written': 0.84}
Semantic Relations	animal_sound	frog is to ribbit as whale is to	sing	?	0.11	0	{'?': 0.05, '': 0.07, '______': 0.03}	22	0.00952148	0.098877	0.999781	key	key|target	0.84	TRUE	TRUE	TRUE	target	{'sing': 0.84}
Semantic Relations	male_female	lady is to gentleman as superwoman is to	superman	______	0.11	0	{'______': 0.11, '__': 0.06, 'what': 0.06, '?': 0.05, ':': 0.05}	15	0.0167236	0.0887451	0.999851	key	key|target	0.84	TRUE	TRUE	TRUE	target	{'superman': 0.84}
Semantic Relations	male_female	king is to queen as ram is to	ewe	?	0.11	0	{'?': 0.08, ':': 0.06, '': 0.06}	2383	3.66569e-06	0.113766	0.976254	key	key|target	0.84	TRUE	TRUE	TRUE	target	{'ewe': 0.84}
Morphological Modifiers	verb+tion_irreg	computation is to compute as globalization is to	globalize	politics	0.1	0	{'politics': 0.1, 'culture': 0.07, 'the': 0.05, 'geography': 0.04, 'colon': 0.03}	5	0.0256348	0.0695801	0.99995	key	key|target	0.84	TRUE	TRUE	TRUE	target	{'globalize': 0.84}
Morphological Modifiers	over+adj_reg	powered is to overpowered as qualified is to	overqualified	______	0.1	0	{'______': 0.1, 'un': 0.07, 'qualified': 0.06, 'what': 0.04, '__': 0.04}	14	0.0203857	0.0831299	0.99986	key	key|target	0.84	TRUE	TRUE	TRUE	target	{'overqualified': 0.84}
Semantic Hierarchies	hyponyms_misc	bunk is to bed as jeans is to	trousers	pants	0.1	0	{'pants': 0.1, '______': 0.07, 'what': 0.05, '____': 0.04, 'suit': 0.03}	6	0.0294189	0.0731201	0.99994	key	key|target	0.84	TRUE	TRUE	TRUE	target	{'trousers': 0.84}
Semantic Relations	antonyms_binary	vacant is to occupied as away is to	toward	present	0.1	0	{'present': 0.1, 'home': 0.07, '_____': 0.05, 'near': 0.04, 'where': 0.04}	29	0.00680542	0.0932922	0.999711	key	key|target	0.84	TRUE	TRUE	TRUE	target	{'toward': 0.84}
Factual Knowledge	name_occupation	mencius is to philosopher as strauss is to	composer	philosopher	0.09	0	{'philosopher': 0.09, 'political': 0.07, 'politician': 0.03, 'what': 0.02, '...': 0.02}	240	0.000495911	0.0859299	0.997608	key	key|target	0.84	TRUE	TRUE	TRUE	target	{'composer': 0.84}
Morphological Modifiers	verb+ment_irreg	agreement is to agree as harassment is to	harass	flirt	0.09	0	{'flirt': 0.09, 'fl': 0.03, 'compliment': 0.03, 'friendship': 0.03, 'sed': 0.03}	9	0.0161133	0.0766602	0.99991	key	key|target	0.84	TRUE	TRUE	TRUE	target	{'harass': 0.84}
Morphological Modifiers	verb+able_reg	afford is to affordable as believe is to	believeable	______	0.09	0	{'______': 0.09, 'belief': 0.07, 'believable': 0.06, '__': 0.05, '': 0.03}	15	0.0130005	0.0768433	0.999851	key	key|target	0.84	TRUE	TRUE	TRUE	target	{'believeable': 0.84}
Morphological Modifiers	comparative	long is to longer as strong is to	stronger		0.09	0	{'': 0.06, '?': 0.09, ':': 0.06, 'a': 0.05}	9	0.0286865	0.0655518	0.99991	key	key|target	0.84	TRUE	TRUE	TRUE	target	{'stronger': 0.84}
Semantic Hierarchies	hypernyms_misc	postcard is to card as sunscreen is to	cream		0.09	0	{'': 0.06, 'what': 0.06, ':': 0.04, '_____': 0.04}	275	0.000142097	0.0931196	0.99726	key	key|target	0.84	TRUE	TRUE	TRUE	target	{'cream': 0.84}
Semantic Hierarchies	hypernyms_misc	citrus is to lemon as container is to	tub	?	0.09	0	{'?': 0.03, 'box': 0.06, '': 0.04, 'what': 0.03}	143	0.000686646	0.0920868	0.998575	key	key|target	0.84	TRUE	TRUE	TRUE	target	{'tub': 0.84}
Morphological Modifiers	verb+tion_irreg	compute is to computation as degrade is to	degradation	______	0.08	0	{'______': 0.08, '__': 0.05, 'improvement': 0.05, '': 0.04, '"': 0.04}	20	0.010437	0.0715942	0.999801	key	key|target	0.84	TRUE	TRUE	TRUE	target	{'degradation': 0.84}
Semantic Hierarchies	hypernyms_misc	diary is to journal as peach is to	fruit	apple	0.08	0	{'apple': 0.08, '__': 0.07, '______': 0.06, 'pear': 0.05, 'plum': 0.04}	11	0.019165	0.0614014	0.99989	key	key|target	0.84	TRUE	TRUE	TRUE	target	{'fruit': 0.84}
Semantic Hierarchies	hypernyms_misc	toiletry is to deodorant as pin is to	hairpin	______	0.08	0	{'______': 0.08, '_____': 0.05, 'needle': 0.04, 'a': 0.04, 'what': 0.03}	228	0.00028038	0.0827274	0.997728	key	key|target	0.84	TRUE	TRUE	TRUE	target	{'hairpin': 0.84}
Semantic Relations	animal_sound	alpaca is to bray as gorilla is to	grunt	__	0.08	0	{'__': 0.08, '______': 0.05, 'what': 0.04, 'laugh': 0.03, '': 0.03}	13	0.0180664	0.0581055	0.99987	key	key|target	0.84	TRUE	TRUE	TRUE	target	{'grunt': 0.84}
Semantic Relations	animal_sound	frog is to ribbit as moose is to	bellow	?	0.08	0	{'?': 0.06, 'A': 0.05, '': 0.05}	253	0.0001688	0.0818624	0.997479	key	key|target	0.84	TRUE	TRUE	TRUE	target	{'bellow': 0.84}
Semantic Relations	antonyms_binary	exit is to entrance as inverse is to	reverse	?	0.08	0	{'?': 0.04, '?"': 0.06, 'direct': 0.06, 'product': 0.04}	42	0.00390625	0.074707	0.999581	key	key|target	0.84	TRUE	TRUE	TRUE	target	{'reverse': 0.84}
Semantic Relations	antonyms_binary	back is to front as outbound is to	inbound	?	0.08	0	{'?': 0.08, '': 0.06, '______': 0.05, '"': 0.05, ':': 0.04}	7	0.0388184	0.0383301	0.99993	key	key|target	0.84	TRUE	TRUE	TRUE	target	{'inbound': 0.84}
Semantic Relations	antonyms_binary	rise is to sink as southeast is to	southwest		0.08	0	{'': 0.04, '______': 0.08, 'north': 0.07, '"': 0.05}	6	0.0334473	0.0422363	0.99994	key	key|target	0.84	TRUE	TRUE	TRUE	target	{'southwest': 0.84}
Semantic Hierarchies	hypernyms_misc	hairpin is to pin as tub is to	container		0.07	0	{'': 0.05, '______': 0.06, '?': 0.05, ':': 0.04}	154	0.000480652	0.0727615	0.998465	key	key|target	0.84	TRUE	TRUE	TRUE	target	{'container': 0.84}
Semantic Relations	animal_sound	buzz is to hornet as gobble is to	turkey	______	0.07	0	{'______': 0.07, 'gob': 0.07, '': 0.05, 'what': 0.04}	18	0.0106201	0.0631104	0.999821	key	key|target	0.84	TRUE	TRUE	TRUE	target	{'turkey': 0.84}
Semantic Relations	antonyms_gradable	lumpy is to flat as organized is to	unorganized		0.07	0	{'': 0.07, 'dis': 0.05, 'random': 0.04, '_': 0.04, '______': 0.04}	13	0.0209961	0.0522461	0.99987	key	key|target	0.84	TRUE	TRUE	TRUE	target	{'unorganized': 0.84}
Semantic Relations	antonyms_gradable	lumpy is to flat as tasty is to	tasteless		0.07	0	{'': 0.04, '"': 0.06, '?': 0.04, '______': 0.04}	81	0.00169373	0.0656891	0.999193	key	key|target	0.84	TRUE	TRUE	TRUE	target	{'tasteless': 0.84}
Semantic Relations	male_female	prince is to princess as ram is to	ewe	?	0.07	0	{'?': 0.07, '____': 0.04, '': 0.04, 'ram': 0.03, 'what': 0.03}	2219	5.90086e-06	0.0742128	0.977888	key	key|target	0.84	TRUE	TRUE	TRUE	target	{'ewe': 0.84}
Semantic Hierarchies	hypernyms_misc	notebook is to book as pie is to	pastry	pie	0.05	0	{'pie': 0.05, 'what': 0.04, '__': 0.04, '': 0.04, '______': 0.03}	9	0.0300293	0.0227051	0.99991	key	key|target	0.84	TRUE	TRUE	TRUE	target	{'pastry': 0.84}
Semantic Relations	animal_shelter	hornet is to nest as seal is to	den		0.05	0	{'': 0.05, 'nest': 0.05, '______': 0.05, '_____': 0.04, 'swim': 0.03}	21	0.00897217	0.0459595	0.999791	key	key|target	0.84	TRUE	TRUE	TRUE	target	{'den': 0.84}
Morphological Modifiers	re+verb_reg	create is to recreate as locate is to	relocate	locate	0.71	0	{'locate': 0.71, 'find': 0.05, 'location': 0.04, 'search': 0.02, 'lookup': 0.02}	6	0.0114136	0.695618	0.99994	key	key|target	0.83	TRUE	TRUE	TRUE	target	{'relocate': 0.83}
Morphological Modifiers	re+verb_reg	evaluate is to reevaluate as generate is to	regenerate	generate	0.59	0	{'generate': 0.59, 'create': 0.03, 'produce': 0.02, '______': 0.01, '__': 0.01}	5	0.0114136	0.574524	0.99995	key	key|target	0.83	TRUE	TRUE	TRUE	target	{'regenerate': 0.83}
Morphological Modifiers	re+verb_reg	calculate is to recalculate as occur is to	reoccur	occur	0.59	0	{'occur': 0.59, 'recur': 0.18, 'happen': 0.02, 'occ': 0.02, 'to': 0.01}	13	0.00372314	0.582214	0.99987	key	key|target	0.83	TRUE	TRUE	TRUE	target	{'reoccur': 0.83}
Morphological Modifiers	re+verb_reg	evaluate is to reevaluate as locate is to	relocate	locate	0.56	0	{'locate': 0.56, 'location': 0.08, 'localize': 0.03, 'find': 0.03, 'locating': 0.01}	6	0.0140381	0.544556	0.99994	key	key|target	0.83	TRUE	TRUE	TRUE	target	{'relocate': 0.83}
Morphological Modifiers	re+verb_reg	assess is to reassess as introduce is to	reintroduce	introduce	0.52	0	{'introduce': 0.52, 'present': 0.04, 'initiate': 0.02, 'innovate': 0.01, 'invent': 0.01}	31	0.00241089	0.521027	0.999691	key	key|target	0.83	TRUE	TRUE	TRUE	target	{'reintroduce': 0.83}
Morphological Modifiers	re+verb_reg	calculate is to recalculate as submit is to	resubmit	submit	0.51	0	{'submit': 0.51, 'commit': 0.07, 'save': 0.05, 'send': 0.04, 'accept': 0.02}	5	0.017334	0.490479	0.99995	key	key|target	0.83	TRUE	TRUE	TRUE	target	{'resubmit': 0.83}
Morphological Modifiers	re+verb_reg	consider is to reconsider as generate is to	regenerate	generate	0.46	0	{'generate': 0.46, 'produce': 0.05, 'generation': 0.04, 'create': 0.03, 'generator': 0.02}	8	0.00842285	0.452515	0.99992	key	key|target	0.83	TRUE	TRUE	TRUE	target	{'regenerate': 0.83}
Morphological Modifiers	re+verb_reg	consider is to reconsider as decorate is to	redecorate	decorate	0.46	0	{'decorate': 0.46, 'decorated': 0.05, 'decor': 0.05, 'und': 0.04, 'decoration': 0.04}	5	0.0334473	0.42749	0.99995	key	key|target	0.83	TRUE	TRUE	TRUE	target	{'redecorate': 0.83}
Factual Knowledge	capital_world	Brussels is to Belgium as Georgetown is to	guyana	Washington	0.43	0	{'Washington': 0.43, 'the': 0.23, 'D': 0.09, 'DC': 0.06, 'Virginia': 0.02}	31	0.00111389	0.42662	0.999691	key	key|target	0.83	TRUE	TRUE	TRUE	target	{'guyana': 0.83}
Morphological Modifiers	re+verb_reg	decorate is to redecorate as invest is to	reinvest	invest	0.39	0	{'invest': 0.39, 'speculate': 0.04, 'investment': 0.03, 'investing': 0.03, '': 0.03}	6	0.0219727	0.366699	0.99994	key	key|target	0.83	TRUE	TRUE	TRUE	target	{'reinvest': 0.83}
Factual Knowledge	capital_world	Doha is to Qatar as Nassau is to	bahamas	the	0.32	0	{'the': 0.32, 'The': 0.13, ':': 0.08, '__': 0.06, '___': 0.04}	7	0.0224609	0.297852	0.99993	key	key|target	0.83	TRUE	TRUE	TRUE	target	{'bahamas': 0.83}
Semantic Hierarchies	hypernyms_misc	picture is to photo as cream is to	sunscreen	milk	0.31	0	{'milk': 0.31, '______': 0.06, '_____': 0.05, '____': 0.04, 'coffee': 0.04}	1237	1.3113e-05	0.306628	0.987673	key	key|target	0.83	TRUE	TRUE	TRUE	target	{'sunscreen': 0.83}
Morphological Modifiers	adj+ness_reg	conscious is to consciousness as unique is to	uniqueness	universal	0.22	0	{'universal': 0.22, 'common': 0.11, 'general': 0.08, 'generic': 0.05, 'identical': 0.03}	23	0.00512695	0.212646	0.999771	key	key|target	0.83	TRUE	TRUE	TRUE	target	{'uniqueness': 0.83}
Morphological Modifiers	verb+er_irreg	eater is to eat as follower is to	follow	leader	0.21	0	{'leader': 0.21, '______': 0.07, 'follower': 0.04, '_____': 0.04, '__': 0.03}	35	0.00387573	0.207062	0.999651	key	key|target	0.83	TRUE	TRUE	TRUE	target	{'follow': 0.83}
Morphological Modifiers	over+adj_reg	arching is to overarching as stretched is to	overstretched	stretched	0.17	0	{'stretched': 0.17, '?': 0.1, '______': 0.08, '': 0.04}	70	0.00124359	0.167702	0.999302	key	key|target	0.83	TRUE	TRUE	TRUE	target	{'overstretched': 0.83}
Morphological Modifiers	over+adj_reg	spent is to overspent as written is to	overwritten	written	0.16	0	{'written': 0.16, '______': 0.1, 'rewritten': 0.04, 'unw': 0.04, '_____': 0.03}	29	0.00509644	0.154083	0.999711	key	key|target	0.83	TRUE	TRUE	TRUE	target	{'overwritten': 0.83}
Semantic Hierarchies	hypernyms_misc	peach is to fruit as perfume is to	toiletry	flowers	0.16	0	{'flowers': 0.16, 'flower': 0.1, 'fragrance': 0.08, '______': 0.06, '__': 0.04}	111	0.000537872	0.163525	0.998894	key	key|target	0.83	TRUE	TRUE	TRUE	target	{'toiletry': 0.83}
Morphological Modifiers	re+verb_reg	confirm is to reconfirm as integrate is to	reintegrate	integrate	0.15	0	{'integrate': 0.15, 'dis': 0.13, 'assim': 0.08, 'segreg': 0.04, 'incorporate': 0.04}	6	0.0281982	0.124146	0.99994	key	key|target	0.83	TRUE	TRUE	TRUE	target	{'reintegrate': 0.83}
Semantic Relations	animal_sound	bellow is to elk as chirrup is to	songbird		0.15	0	{'': 0.12, ':': 0.04, 'a': 0.03}	209	0.000303268	0.15204	0.997917	key	key|target	0.83	TRUE	TRUE	TRUE	target	{'songbird': 0.83}
Verbal & Grammatical Forms	verb_Ving_Ved	added is to adding as involved is to	involving	involved	0.15	0	{'involved': 0.15, '': 0.04, '______': 0.05, '__': 0.03}	9	0.0139771	0.136414	0.99991	key	key|target	0.83	TRUE	TRUE	TRUE	target	{'involving': 0.83}
Semantic Relations	animal_shelter	bat is to cave as fish is to	sea	?	0.14	0	{'?': 0.14, 'water': 0.07, '': 0.05, '_____': 0.05, 'what': 0.05}	25	0.00921631	0.126526	0.999751	key	key|target	0.83	TRUE	TRUE	TRUE	target	{'sea': 0.83}
Morphological Modifiers	verb+er_irreg	eater is to eat as subscriber is to	subscribe	______	0.13	0	{'______': 0.13, '_____': 0.06, '__': 0.04, '____': 0.04, '?': 0.03}	71	0.00182343	0.130013	0.999292	key	key|target	0.83	TRUE	TRUE	TRUE	target	{'subscribe': 0.83}
Semantic Hierarchies	hypernyms_misc	diary is to journal as lotion is to	toiletry	soap	0.13	0	{'soap': 0.13, 'cream': 0.07, '______': 0.05, 'a': 0.04, '__': 0.04}	93	0.00102997	0.125923	0.999073	key	key|target	0.83	TRUE	TRUE	TRUE	target	{'toiletry': 0.83}
Semantic Hierarchies	hypernyms_misc	diary is to journal as shirt is to	clothes	______	0.12	0	{'______': 0.12, '____': 0.07, '__': 0.06, '_____': 0.06, 'blouse': 0.04}	42	0.00442505	0.117157	0.999581	key	key|target	0.83	TRUE	TRUE	TRUE	target	{'clothes': 0.83}
Semantic Hierarchies	hypernyms_misc	sweater is to clothes as tv is to	device	entertainment	0.12	0	{'entertainment': 0.12, 'electronics': 0.1, '______': 0.04, '____': 0.03, 'what': 0.03}	242	0.00025177	0.118889	0.997588	key	key|target	0.83	TRUE	TRUE	TRUE	target	{'device': 0.83}
Semantic Hierarchies	hypernyms_misc	dessert is to cake as brush is to	toothbrush	"	0.11	0	{'"': 0.03, 'paint': 0.09, '': 0.04, 'a': 0.03}	54	0.00270081	0.108139	0.999462	key	key|target	0.83	TRUE	TRUE	TRUE	target	{'toothbrush': 0.83}
Semantic Hierarchies	hypernyms_misc	journal is to diary as jar is to	vase		0.11	0	{'': 0.08, '____': 0.05, ':': 0.04, '______': 0.03}	216	0.000257492	0.110094	0.997848	key	key|target	0.83	TRUE	TRUE	TRUE	target	{'vase': 0.83}
Semantic Hierarchies	hypernyms_misc	card is to postcard as brush is to	toothbrush	paint	0.11	0	{'paint': 0.11, '?': 0.09, '': 0.07, 'brush': 0.04, ':': 0.04}	84	0.000938416	0.110878	0.999163	key	key|target	0.83	TRUE	TRUE	TRUE	target	{'toothbrush': 0.83}
Semantic Relations	animal_sound	bray is to donkey as baa is to	sheep		0.11	0	{'': 0.03, '?': 0.08, ':': 0.05}	26	0.00689697	0.107849	0.999741	key	key|target	0.83	TRUE	TRUE	TRUE	target	{'sheep': 0.83}
Semantic Relations	family	stepsister is to stepbrother as niece is to	nephew	what	0.11	0	{'what': 0.11, '______': 0.06, ':': 0.05, '?': 0.05, 'uncle': 0.04}	9	0.0302734	0.0820312	0.99991	key	key|target	0.83	TRUE	TRUE	TRUE	target	{'nephew': 0.83}
Verbal & Grammatical Forms	plural	mangoes is to mango as women is to	woman	man	0.11	0	{'man': 0.11, 'men': 0.09, '______': 0.07, '____': 0.05, 'women': 0.04}	5	0.0371094	0.0771484	0.99995	key	key|target	0.83	TRUE	TRUE	TRUE	target	{'woman': 0.83}
Semantic Hierarchies	hypernyms_misc	peach is to fruit as vase is to	jar	flower	0.1	0	{'flower': 0.1, '': 0.05, '?': 0.05, ':': 0.04}	291	0.000141144	0.101421	0.9971	key	key|target	0.83	TRUE	TRUE	TRUE	target	{'jar': 0.83}
Semantic Relations	animal_shelter	rat is to nest as seal is to	den		0.1	0	{'': 0.03, '_____': 0.04, '?': 0.04, '______': 0.03}	10	0.015564	0.0796509	0.9999	key	key|target	0.83	TRUE	TRUE	TRUE	target	{'den': 0.83}
Semantic Relations	animal_shelter	bat is to cave as goldfish is to	pond	?	0.1	0	{'?': 0.1, 'bowl': 0.08, 'fish': 0.06, '': 0.06, 'what': 0.04}	36	0.00366211	0.0939941	0.999641	key	key|target	0.83	TRUE	TRUE	TRUE	target	{'pond': 0.83}
Semantic Relations	antonyms_gradable	bright is to pale as clear is to	vague	murky	0.1	0	{'murky': 0.1, 'muddy': 0.08, '______': 0.08, 'cloudy': 0.05, '__': 0.04}	115	0.00088501	0.101654	0.998854	key	key|target	0.83	TRUE	TRUE	TRUE	target	{'vague': 0.83}
Verbal & Grammatical Forms	plural	mangoes is to mango as roads is to	road	______	0.1	0	{'______': 0.1, 'what': 0.07, 'cars': 0.04, '_____': 0.04, 'city': 0.03}	9	0.0257568	0.0762939	0.99991	key	key|target	0.83	TRUE	TRUE	TRUE	target	{'road': 0.83}
Semantic Relations	animal_shelter	crocodile is to river as termite is to	hill		0.09	0	{'': 0.06, '?': 0.06, '______': 0.05, ':': 0.05}	34	0.00454712	0.0896912	0.999661	key	key|target	0.83	TRUE	TRUE	TRUE	target	{'hill': 0.83}
Verbal & Grammatical Forms	plural_verbs	find is to finds as describe is to	describes		0.09	0	{'': 0.05, '______': 0.08, '__': 0.06, '_____': 0.04}	7	0.0280762	0.064209	0.99993	key	key|target	0.83	TRUE	TRUE	TRUE	target	{'describes': 0.83}
Factual Knowledge	capital_world	Ukraine is to Kiev as Morocco is to	rabat	:	0.08	0	{':': 0.03, '__': 0.05, '______': 0.04, 'what': 0.03}	12	0.0281982	0.0484619	0.99988	key	key|target	0.83	TRUE	TRUE	TRUE	target	{'rabat': 0.83}
Semantic Hierarchies	hypernyms_misc	food is to pastry as walk is to	sidewalk	"	0.08	0	{'"': 0.03, 'run': 0.08, 'crawl': 0.04, '': 0.03}	114	0.000965118	0.075695	0.998864	key	key|target	0.83	TRUE	TRUE	TRUE	target	{'sidewalk': 0.83}
Semantic Hierarchies	hypernyms_misc	hairpin is to pin as pie is to	pastry	pie	0.08	0	{'pie': 0.08, 'pin': 0.08, 'what': 0.06, '__': 0.04, '______': 0.04}	63	0.00164032	0.0828323	0.999372	key	key|target	0.83	TRUE	TRUE	TRUE	target	{'pastry': 0.83}
Semantic Hierarchies	hypernyms_misc	pie is to pastry as tub is to	container	water	0.08	0	{'water': 0.08, 'bath': 0.06, '______': 0.05, '__': 0.05, '_____': 0.03}	109	0.00100708	0.0815125	0.998914	key	key|target	0.83	TRUE	TRUE	TRUE	target	{'container': 0.83}
Semantic Hierarchies	hypernyms_misc	sofa is to furniture as sunscreen is to	cream	what	0.08	0	{'what': 0.08, 'skin': 0.08, 'beach': 0.06, '_____': 0.05, '______': 0.05}	506	4.36306e-05	0.0810111	0.994958	key	key|target	0.83	TRUE	TRUE	TRUE	target	{'cream': 0.83}
Semantic Relations	animal_sound	drone is to beetle as baa is to	sheep	moo	0.08	0	{'moo': 0.08, '______': 0.03, 'ble': 0.03, 'b': 0.03, '': 0.03}	12	0.0147705	0.0604248	0.99988	key	key|target	0.83	TRUE	TRUE	TRUE	target	{'sheep': 0.83}
Semantic Relations	antonyms_binary	input is to output as inverse is to	reverse	what	0.08	0	{'what': 0.08, 'direct': 0.05, 'inverse': 0.04, '?': 0.04, 'output': 0.03}	38	0.00469971	0.0739136	0.999621	key	key|target	0.83	TRUE	TRUE	TRUE	target	{'reverse': 0.83}
Factual Knowledge	capital_world	Bulgaria is to Sofia as Tunisia is to	tunis	__	0.07	0	{'__': 0.07, '?': 0.05, '': 0.05, 'what': 0.05, ':': 0.04}	5	0.0395508	0.0297852	0.99995	key	key|target	0.83	TRUE	TRUE	TRUE	target	{'tunis': 0.83}
Semantic Hierarchies	hypernyms_misc	journal is to diary as walk is to	sidewalk	run	0.07	0	{'run': 0.07, '______': 0.05, '____': 0.05, '': 0.04}	893	2.74181e-05	0.0732148	0.991101	key	key|target	0.83	TRUE	TRUE	TRUE	target	{'sidewalk': 0.83}
Semantic Relations	animal_sound	dog is to bark as moose is to	bellow	what	0.07	0	{'what': 0.07, '______': 0.06, '_____': 0.05, 'roar': 0.04, '': 0.04}	117	0.000835419	0.0699654	0.998834	key	key|target	0.83	TRUE	TRUE	TRUE	target	{'bellow': 0.83}
Semantic Relations	animal_shelter	ape is to grove as trout is to	river	______	0.07	0	{'______': 0.07, '': 0.06, '_____': 0.05, '?': 0.05, 'what': 0.05}	12	0.0194092	0.0484619	0.99988	key	key|target	0.83	TRUE	TRUE	TRUE	target	{'river': 0.83}
Semantic Relations	male_female	emperor is to empress as mister is to	miss		0.07	0	{'': 0.05, '?': 0.05, 'what': 0.05, 'mistress': 0.05}	6	0.0449219	0.0288086	0.99994	key	key|target	0.83	TRUE	TRUE	TRUE	target	{'miss': 0.83}
Morphological Modifiers	un+adj_reg	unaffected is to affected as unpaid is to	paid	______	0.06	0	{'______': 0.06, '_____': 0.05, '__': 0.05, 'collected': 0.05, 'what': 0.05}	7	0.0412598	0.0151367	0.99993	key	key|target	0.83	TRUE	TRUE	TRUE	target	{'paid': 0.83}
Semantic Hierarchies	hypernyms_misc	book is to notebook as pad is to	notepad	pad	0.06	0	{'pad': 0.06, '______': 0.05, 'what': 0.05, '"': 0.04, '': 0.04}	46	0.00292969	0.0595703	0.999542	key	key|target	0.83	TRUE	TRUE	TRUE	target	{'notepad': 0.83}
Semantic Relations	animal_sound	dog is to bark as elk is to	bellow	______	0.06	0	{'______': 0.06, 'roar': 0.04, 'what': 0.04, '': 0.04, '"': 0.04}	77	0.00157928	0.0633621	0.999233	key	key|target	0.83	TRUE	TRUE	TRUE	target	{'bellow': 0.83}
Semantic Relations	animal_sound	ferret is to dook as gorilla is to	grunt	what	0.06	0	{'what': 0.06, '__': 0.05, '': 0.04, '______': 0.03}	10	0.0186768	0.0386963	0.9999	key	key|target	0.83	TRUE	TRUE	TRUE	target	{'grunt': 0.83}
Semantic Hierarchies	hypernyms_misc	deodorant is to toiletry as sunscreen is to	cream		0.05	0	{'': 0.04, 'what': 0.05, '"': 0.05, ':': 0.04}	279	0.000149727	0.0547819	0.99722	key	key|target	0.83	TRUE	TRUE	TRUE	target	{'cream': 0.83}
Morphological Modifiers	verb+tion_irreg	compilation is to compile as perspiration is to	perspire	inspiration	0.93	0	{'inspiration': 0.93, 'blood': 0.01, 'tears': 0.01, 'bleeding': 0.0, 'hard': 0.0}	11	0.000823975	0.93277	0.99989	key	key|target	0.82	TRUE	TRUE	TRUE	target	{'perspire': 0.82}
Semantic Relations	antonyms_binary	beginning is to end as outward is to	upward	inward	0.88	0	{'inward': 0.88, 'inner': 0.02, 'within': 0.01, '': 0.01, 'inside': 0.01}	8	0.00405884	0.874847	0.99992	key	key|target	0.82	TRUE	TRUE	TRUE	target	{'upward': 0.82}
Morphological Modifiers	adj+ness_reg	directedness is to directed as sameness is to	same	difference	0.8	0	{'difference': 0.8, 'diversity': 0.02, 'different': 0.01, 'distinction': 0.01, 'identity': 0.01}	121	0.000155449	0.79672	0.998794	key	key|target	0.82	TRUE	TRUE	TRUE	target	{'same': 0.82}
Factual Knowledge	capital_world	Beirut is to Lebanon as Georgetown is to	guyana	Washington	0.67	0	{'Washington': 0.67, 'the': 0.09, 'D': 0.08, 'DC': 0.06, 'Georgetown': 0.01}	9	0.00213623	0.669739	0.99991	key	key|target	0.82	TRUE	TRUE	TRUE	target	{'guyana': 0.82}
Factual Knowledge	country_capital	Philippines is to Manila as Georgia is to	tbilisi	Atlanta	0.62	0	{'Atlanta': 0.62, '__': 0.05, '______': 0.04, '?': 0.01, ':': 0.01}	647	1.04308e-05	0.617177	0.993553	key	key|target	0.82	TRUE	TRUE	TRUE	target	{'tbilisi': 0.82}
Factual Knowledge	capital_world	Philippines is to Manila as Georgia is to	tbilisi	Atlanta	0.62	0	{'Atlanta': 0.62, '__': 0.05, '______': 0.04, '?': 0.01, ':': 0.01}	647	1.04308e-05	0.617177	0.993553	key	key|target	0.82	TRUE	TRUE	TRUE	target	{'tbilisi': 0.82}
Semantic Relations	antonyms_binary	below is to above as inverse is to	reverse	direct	0.6	0	{'direct': 0.6, 'inverse': 0.06, 'division': 0.03, 'product': 0.03, 'reciprocal': 0.02}	18	0.00402832	0.593628	0.999821	key	key|target	0.82	TRUE	TRUE	TRUE	target	{'reverse': 0.82}
Factual Knowledge	country_capital	England is to London as Georgia is to	tbilisi	Atlanta	0.59	0	{'Atlanta': 0.59, '______': 0.06, '__': 0.05, 'what': 0.03, '?': 0.01}	1014	4.91738e-06	0.585933	0.989896	key	key|target	0.82	TRUE	TRUE	TRUE	target	{'tbilisi': 0.82}
Factual Knowledge	capital_world	England is to London as Georgia is to	tbilisi	Atlanta	0.59	0	{'Atlanta': 0.59, '______': 0.06, '__': 0.05, 'what': 0.03, '?': 0.01}	1014	4.91738e-06	0.585933	0.989896	key	key|target	0.82	TRUE	TRUE	TRUE	target	{'tbilisi': 0.82}
Semantic Relations	animal_sound	cricket is to chirp as songbird is to	chirrup	sing	0.45	0	{'sing': 0.45, '_____': 0.04, '______': 0.04, '__': 0.03, '': 0.02}	21	0.00619507	0.441071	0.999791	key	key|target	0.82	TRUE	TRUE	TRUE	target	{'chirrup': 0.82}
Verbal & Grammatical Forms	noun_plural_irreg	category is to categories as society is to	societies	individuals	0.44	0	{'individuals': 0.44, 'people': 0.16, 'humans': 0.06, 'human': 0.05, 'persons': 0.03}	20	0.00285339	0.434647	0.999801	key	key|target	0.82	TRUE	TRUE	TRUE	target	{'societies': 0.82}
Morphological Modifiers	re+verb_reg	consider is to reconsider as learn is to	relearn	learn	0.39	0	{'learn': 0.39, 'un': 0.04, 'teach': 0.04, 'learning': 0.04, 'learned': 0.03}	8	0.0152588	0.379272	0.99992	key	key|target	0.82	TRUE	TRUE	TRUE	target	{'relearn': 0.82}
Morphological Modifiers	re+verb_reg	apply is to reapply as develop is to	redevelop	develop	0.33	0	{'develop': 0.33, 'evolve': 0.04, 'development': 0.04, 'developed': 0.03, 'discover': 0.02}	11	0.00772095	0.320404	0.99989	key	key|target	0.82	TRUE	TRUE	TRUE	target	{'redevelop': 0.82}
Verbal & Grammatical Forms	noun_plural_irreg	categories is to category as women is to	woman	men	0.31	0	{'men': 0.31, 'man': 0.26, '______': 0.03, 'gender': 0.02, 'women': 0.02}	16	0.00521851	0.307281	0.999841	key	key|target	0.82	TRUE	TRUE	TRUE	target	{'woman': 0.82}
Verbal & Grammatical Forms	plural	melons is to melon as women is to	woman	man	0.27	0	{'man': 0.27, 'men': 0.14, '____': 0.05, '______': 0.03, '?': 0.03}	7	0.0223389	0.249146	0.99993	key	key|target	0.82	TRUE	TRUE	TRUE	target	{'woman': 0.82}
Morphological Modifiers	re+verb_reg	deem is to redeem as generate is to	regenerate	generate	0.23	0	{'generate': 0.23, '__': 0.07, '': 0.05, '______': 0.04, '?': 0.03}	42	0.00312805	0.23027	0.999581	key	key|target	0.82	TRUE	TRUE	TRUE	target	{'regenerate': 0.82}
Factual Knowledge	name_occupation	hegel is to philosopher as strauss is to	composer	political	0.21	0	{'political': 0.21, 'historian': 0.09, 'philosopher': 0.08, 'politician': 0.02, 'scholar': 0.02}	97	0.00119019	0.2117	0.999033	key	key|target	0.82	TRUE	TRUE	TRUE	target	{'composer': 0.82}
Semantic Hierarchies	hypernyms_misc	bracelet is to jewelry as cup is to	tableware	?	0.2	0	{'?': 0.05, '': 0.09, '?"': 0.05, ':': 0.04}	50	0.00231934	0.19397	0.999502	key	key|target	0.82	TRUE	TRUE	TRUE	target	{'tableware': 0.82}
Morphological Modifiers	over+adj_reg	exposed is to overexposed as qualified is to	overqualified	un	0.19	0	{'un': 0.19, '______': 0.14, '_____': 0.04, 'disqualified': 0.03, 'A': 0.03}	17	0.00738525	0.183044	0.999831	key	key|target	0.82	TRUE	TRUE	TRUE	target	{'overqualified': 0.82}
Morphological Modifiers	re+verb_reg	assure is to reassure as locate is to	relocate	locate	0.19	0	{'locate': 0.19, '?': 0.08, '': 0.07, '______': 0.05, 'what': 0.05}	6	0.0405273	0.152832	0.99994	key	key|target	0.82	TRUE	TRUE	TRUE	target	{'relocate': 0.82}
Semantic Relations	antonyms_binary	exhale is to inhale as sink is to	rise	float	0.19	0	{'float': 0.19, 'swim': 0.09, '': 0.05, '"': 0.04, '?': 0.03}	5	0.0308838	0.158569	0.99995	key	key|target	0.82	TRUE	TRUE	TRUE	target	{'rise': 0.82}
Verbal & Grammatical Forms	past_tense	implemented is to implementing as spent is to	spending	earned	0.17	0	{'earned': 0.17, 'spent': 0.08, 'saved': 0.08, 'earning': 0.06, 'saving': 0.02}	11	0.0108643	0.159058	0.99989	key	key|target	0.82	TRUE	TRUE	TRUE	target	{'spending': 0.82}
Verbal & Grammatical Forms	noun_plural_irreg	securities is to security as women is to	woman	men	0.17	0	{'men': 0.17, '______': 0.11, '__': 0.05, 'women': 0.03, '_____': 0.02}	49	0.00234985	0.172455	0.999512	key	key|target	0.82	TRUE	TRUE	TRUE	target	{'woman': 0.82}
Morphological Modifiers	verb+tion_irreg	customization is to customize as imagination is to	imagine	reality	0.16	0	{'reality': 0.16, 'reason': 0.04, 'knowledge': 0.04, 'imagination': 0.03, 'memory': 0.03}	195	0.000457764	0.162628	0.998057	key	key|target	0.82	TRUE	TRUE	TRUE	target	{'imagine': 0.82}
Semantic Hierarchies	hypernyms_misc	furniture is to desk as sandwich is to	hamburger	bread	0.14	0	{'bread': 0.14, 'what': 0.07, '?': 0.05, '______': 0.04, '____': 0.04}	123	0.00075531	0.138893	0.998774	key	key|target	0.82	TRUE	TRUE	TRUE	target	{'hamburger': 0.82}
Semantic Hierarchies	hypernyms_misc	appliance is to dishwasher as cream is to	sunscreen	milk	0.14	0	{'milk': 0.14, '_': 0.05, '______': 0.04, '': 0.04, 'coffee': 0.04}	933	2.5034e-05	0.13767	0.990703	key	key|target	0.82	TRUE	TRUE	TRUE	target	{'sunscreen': 0.82}
Morphological Modifiers	over+adj_reg	charged is to overcharged as qualified is to	overqualified	______	0.13	0	{'______': 0.13, 'un': 0.07, '__': 0.04, '_____': 0.04, 'dis': 0.04}	10	0.0184326	0.109497	0.9999	key	key|target	0.82	TRUE	TRUE	TRUE	target	{'overqualified': 0.82}
Semantic Hierarchies	hypernyms_misc	pastry is to pie as container is to	tub	?	0.13	0	{'?': 0.13, '': 0.09, ':': 0.09, '?"': 0.03, 'what': 0.03}	241	0.000203133	0.12675	0.997598	key	key|target	0.82	TRUE	TRUE	TRUE	target	{'tub': 0.82}
Semantic Hierarchies	hypernyms_misc	appliance is to fridge as walk is to	sidewalk	run	0.13	0	{'run': 0.13, '?': 0.05, 'crawl': 0.04, '______': 0.04, 'a': 0.03}	364	0.000110149	0.128796	0.996373	key	key|target	0.82	TRUE	TRUE	TRUE	target	{'sidewalk': 0.82}
Semantic Hierarchies	hypernyms_misc	citrus is to grapefruit as jar is to	vase	jar	0.12	0	{'jar': 0.12, '____': 0.06, '______': 0.06, '?': 0.05, 'what': 0.05}	64	0.00193787	0.121597	0.999362	key	key|target	0.82	TRUE	TRUE	TRUE	target	{'vase': 0.82}
Semantic Relations	antonyms_binary	interior is to exterior as proceed is to	retreat	rec	0.12	0	{'rec': 0.12, '______': 0.07, '': 0.04, '_____': 0.03, '__': 0.03}	10	0.0158691	0.109131	0.9999	key	key|target	0.82	TRUE	TRUE	TRUE	target	{'retreat': 0.82}
Morphological Modifiers	verb+er_irreg	baker is to bake as learner is to	learn	?	0.11	0	{'?': 0.04, '': 0.06, ':': 0.05, '______': 0.04}	7	0.0324707	0.0808105	0.99993	key	key|target	0.82	TRUE	TRUE	TRUE	target	{'learn': 0.82}
Semantic Hierarchies	hypernyms_misc	notebook is to book as sidewalk is to	walk	____	0.11	0	{'____': 0.11, 'road': 0.07, '': 0.06, '_____': 0.05, '___': 0.05}	8	0.0373535	0.0710449	0.99992	key	key|target	0.82	TRUE	TRUE	TRUE	target	{'walk': 0.82}
Semantic Relations	antonyms_gradable	common is to rare as concerned is to	unconcerned	worried	0.11	0	{'worried': 0.11, 'concerned': 0.08, '______': 0.04, 'troubled': 0.04, 'anxious': 0.03}	5	0.0224609	0.0844727	0.99995	key	key|target	0.82	TRUE	TRUE	TRUE	target	{'unconcerned': 0.82}
Morphological Modifiers	adj_superlative	hardy is to hardiest as hungry is to	hungriest	?	0.1	0	{'?': 0.1, '': 0.07, ':': 0.05}	21	0.00848389	0.0945435	0.999791	key	key|target	0.82	TRUE	TRUE	TRUE	target	{'hungriest': 0.82}
Morphological Modifiers	over+adj_reg	done is to overdone as written is to	overwritten	______	0.09	0	{'______': 0.09, '_____': 0.05, 'written': 0.05, '____': 0.04, '__': 0.04}	41	0.00411987	0.0896301	0.999591	key	key|target	0.82	TRUE	TRUE	TRUE	target	{'overwritten': 0.82}
Semantic Hierarchies	hypernyms_misc	device is to stapler as container is to	tub		0.09	0	{'': 0.04, ':': 0.06, '______': 0.04, '?': 0.04}	483	0.000120163	0.0936298	0.995187	key	key|target	0.82	TRUE	TRUE	TRUE	target	{'tub': 0.82}
Verbal & Grammatical Forms	noun_plural_irreg	army is to armies as technology is to	technologies	science	0.09	0	{'science': 0.09, 'tools': 0.07, 'the': 0.07, 'machines': 0.05, 'nature': 0.03}	28	0.00640869	0.0873413	0.999721	key	key|target	0.82	TRUE	TRUE	TRUE	target	{'technologies': 0.82}
Morphological Modifiers	adj+ness_reg	devotedness is to devoted as markedness is to	marked		0.08	0	{'': 0.06, '______': 0.08, '"': 0.05}	12	0.0167236	0.0682373	0.99988	key	key|target	0.82	TRUE	TRUE	TRUE	target	{'marked': 0.82}
Semantic Relations	animal_sound	dook is to ferret as grunt is to	gorilla		0.08	0	{'': 0.05, 'pig': 0.05, '_____': 0.04, '______': 0.04}	132	0.00056839	0.0785332	0.998685	key	key|target	0.82	TRUE	TRUE	TRUE	target	{'gorilla': 0.82}
Semantic Relations	antonyms_binary	below is to above as drop is to	lift	fall	0.08	0	{'fall': 0.08, 'rise': 0.06, 'raise': 0.03, '': 0.03}	6	0.0219727	0.0546875	0.99994	key	key|target	0.82	TRUE	TRUE	TRUE	target	{'lift': 0.82}
Semantic Relations	antonyms_gradable	wet is to dry as flat is to	lumpy	round	0.08	0	{'round': 0.08, 'what': 0.07, 'sharp': 0.06, 'curved': 0.04, 'b': 0.03}	1031	3.19481e-05	0.0810227	0.989726	key	key|target	0.82	TRUE	TRUE	TRUE	target	{'lumpy': 0.82}
Semantic Relations	antonyms_gradable	clean is to dirty as energetic is to	lethargic	lazy	0.08	0	{'lazy': 0.08, '': 0.06, '______': 0.05, 'energetic': 0.05, 'tired': 0.05}	15	0.0162354	0.0662842	0.999851	key	key|target	0.82	TRUE	TRUE	TRUE	target	{'lethargic': 0.82}
Verbal & Grammatical Forms	noun_plural_reg	products is to product as roads is to	road	city	0.08	0	{'city': 0.08, '?': 0.06, 'traffic': 0.05, 'transportation': 0.05, 'cars': 0.05}	8	0.0311279	0.0484619	0.99992	key	key|target	0.82	TRUE	TRUE	TRUE	target	{'road': 0.82}
Verbal & Grammatical Forms	past_tense	dancing is to danced as describing is to	described	______	0.07	0	{'______': 0.07, '': 0.05, '____': 0.05, 'a': 0.04}	8	0.034668	0.0341797	0.99992	key	key|target	0.82	TRUE	TRUE	TRUE	target	{'described': 0.82, 'describes': 0.15}
Semantic Hierarchies	hypernyms_misc	hamburger is to sandwich as tub is to	container	what	0.06	0	{'what': 0.06, '______': 0.05, '': 0.04, 'shower': 0.04, '?"': 0.04}	428	5.126e-05	0.0585425	0.995735	key	key|target	0.82	TRUE	TRUE	TRUE	target	{'container': 0.82}
Semantic Hierarchies	hypernyms_misc	pin is to hairpin as pad is to	notepad		0.06	0	{'': 0.06, '______': 0.04, '?': 0.04, '_____': 0.03, ':': 0.03}	106	0.0010376	0.055603	0.998944	key	key|target	0.82	TRUE	TRUE	TRUE	target	{'notepad': 0.82}
Semantic Relations	animal_sound	ferret is to dook as moose is to	bellow		0.06	0	{'': 0.06, '______': 0.05, 'A': 0.04, '_____': 0.03}	67	0.00176239	0.0585403	0.999332	key	key|target	0.82	TRUE	TRUE	TRUE	target	{'bellow': 0.82}
Semantic Hierarchies	hypernyms_misc	pad is to notepad as food is to	pastry	what	0.04	0	{'what': 0.04, 'food': 0.03, '?': 0.03, '______': 0.03, '__': 0.03}	936	5.62668e-05	0.038518	0.990673	key	key|target	0.82	TRUE	TRUE	TRUE	target	{'pastry': 0.82}
Semantic Relations	antonyms_binary	anterior is to posterior as outward is to	upward	inward	0.67	0	{'inward': 0.67, '': 0.04, '______': 0.03, '"': 0.02, '_____': 0.01}	87	0.000419617	0.667549	0.999133	key	key|target	0.81	TRUE	TRUE	TRUE	target	{'upward': 0.81}
Morphological Modifiers	re+verb_reg	integrate is to reintegrate as upload is to	reupload	download	0.54	0	{'download': 0.54, 'down': 0.02, 'backup': 0.02, 'upload': 0.02, 'embodiment': 0.01}	15	0.00485229	0.538116	0.999851	key	key|target	0.81	TRUE	TRUE	TRUE	target	{'reupload': 0.81}
Factual Knowledge	UK_city_county	bradford is to yorkshire as glasgow is to	lowlands	sc	0.51	0	{'sc': 0.51, '______': 0.04, '__': 0.03, '-': 0.02, '?': 0.02}	62	0.000953674	0.506859	0.999382	key	key|target	0.81	TRUE	TRUE	TRUE	target	{'lowlands': 0.81}
Semantic Relations	antonyms_binary	inbound is to outbound as inverse is to	reverse	direct	0.51	0	{'direct': 0.51, 'reciprocal': 0.04, 'what': 0.03, 'product': 0.02, 'inverse': 0.02}	26	0.00344849	0.50827	0.999741	key	key|target	0.81	TRUE	TRUE	TRUE	target	{'reverse': 0.81}
Factual Knowledge	country_capital	Ireland is to Dublin as Georgia is to	tbilisi	Atlanta	0.49	0	{'Atlanta': 0.49, '__': 0.07, '______': 0.06, '?': 0.01, 'what': 0.01}	595	1.75238e-05	0.488264	0.994071	key	key|target	0.81	TRUE	TRUE	TRUE	target	{'tbilisi': 0.81}
Morphological Modifiers	re+verb_reg	define is to redefine as invest is to	reinvest	invest	0.45	0	{'invest': 0.45, 'div': 0.1, 'vest': 0.04, 'invent': 0.03, 'involve': 0.02}	11	0.00564575	0.44162	0.99989	key	key|target	0.81	TRUE	TRUE	TRUE	target	{'reinvest': 0.81}
Morphological Modifiers	re+verb_reg	deem is to redeem as install is to	reinstall	install	0.37	0	{'install': 0.37, '': 0.05, '__': 0.05, '______': 0.03, '?': 0.03}	50	0.00166321	0.369431	0.999502	key	key|target	0.81	TRUE	TRUE	TRUE	target	{'reinstall': 0.81}
Morphological Modifiers	adj+ness_reg	effectiveness is to effective as madness is to	mad	sanity	0.36	0	{'sanity': 0.36, 'sane': 0.08, 'insanity': 0.06, 'wisdom': 0.04, 'madness': 0.03}	10	0.00708008	0.356201	0.9999	key	key|target	0.81	TRUE	TRUE	TRUE	target	{'mad': 0.81}
Semantic Relations	animal_shelter	fox is to den as woodchuck is to	hole	bur	0.36	0	{'bur': 0.36, '': 0.03, '?': 0.04}	15	0.0114136	0.344055	0.999851	key	key|target	0.81	TRUE	TRUE	TRUE	target	{'hole': 0.81}
Semantic Relations	antonyms_binary	decrement is to increment as inverse is to	reverse	direct	0.35	0	{'direct': 0.35, 'product': 0.04, 'inverse': 0.03, 'what': 0.03, 'opposite': 0.02}	21	0.00683594	0.342773	0.999791	key	key|target	0.81	TRUE	TRUE	TRUE	target	{'reverse': 0.81}
Semantic Hierarchies	hypernyms_misc	shelf is to furniture as tub is to	container	?	0.34	0	{'?': 0.04, '?"': 0.05, '': 0.04}	172	0.0001688	0.343581	0.998286	key	key|target	0.81	TRUE	TRUE	TRUE	target	{'container': 0.81}
Semantic Relations	animal_sound	elk is to bellow as hornet is to	buzz	sting	0.32	0	{'sting': 0.32, '______': 0.06, '__': 0.06, '': 0.03}	7	0.0203857	0.299927	0.99993	key	key|target	0.81	TRUE	TRUE	TRUE	target	{'buzz': 0.81}
Semantic Relations	animal_sound	seal is to bark as songbird is to	chirrup	sing	0.29	0	{'sing': 0.29, '______': 0.06, '_____': 0.05, '__': 0.04, 'song': 0.04}	5	0.034668	0.256348	0.99995	key	key|target	0.81	TRUE	TRUE	TRUE	target	{'chirrup': 0.81}
Morphological Modifiers	over+adj_reg	represented is to overrepresented as written is to	overwritten	spoken	0.28	0	{'spoken': 0.28, 'unw': 0.09, 'rewritten': 0.07, 'written': 0.07, 'read': 0.04}	59	0.00135803	0.274033	0.999412	key	key|target	0.81	TRUE	TRUE	TRUE	target	{'overwritten': 0.81}
Morphological Modifiers	comparative	fast is to faster as weak is to	weaker	strong	0.27	0	{'strong': 0.27, 'stronger': 0.06, '______': 0.04, '': 0.04, ':': 0.03}	37	0.00346375	0.262161	0.999631	key	key|target	0.81	TRUE	TRUE	TRUE	target	{'weaker': 0.81}
Semantic Relations	male_female	batman is to batwoman as ram is to	ewe	ram	0.26	0	{'ram': 0.26, '?': 0.04, '______': 0.04, '____': 0.03, 'r': 0.03}	20929	8.14907e-08	0.257812	0.791444	key	key|target	0.81	TRUE	TRUE	TRUE	target	{'ewe': 0.81}
Morphological Modifiers	re+verb_reg	reconfirm is to confirm as relocate is to	locate	relocate	0.24	0	{'relocate': 0.24, 'move': 0.11, 're': 0.11, '______': 0.03, '': 0.03}	5	0.0223389	0.217896	0.99995	key	key|target	0.81	TRUE	TRUE	TRUE	target	{'locate': 0.81}
Verbal & Grammatical Forms	noun_plural_irreg	theories is to theory as women is to	woman	men	0.23	0	{'men': 0.23, 'man': 0.1, 'women': 0.05, '______': 0.04, 'sex': 0.02}	13	0.00927734	0.216309	0.99987	key	key|target	0.81	TRUE	TRUE	TRUE	target	{'woman': 0.81}
Morphological Modifiers	re+verb_reg	invest is to reinvest as occur is to	reoccur	occur	0.22	0	{'occur': 0.22, 'happen': 0.14, 'recur': 0.1, '': 0.02, '__': 0.02}	14	0.00540161	0.210419	0.99986	key	key|target	0.81	TRUE	TRUE	TRUE	target	{'reoccur': 0.81}
Verbal & Grammatical Forms	noun_plural_reg	versions is to version as weeks is to	week	days	0.21	0	{'days': 0.21, 'years': 0.08, 'months': 0.06, 'weeks': 0.06, '__': 0.03}	12	0.0117798	0.197205	0.99988	key	key|target	0.81	TRUE	TRUE	TRUE	target	{'week': 0.81}
Morphological Modifiers	verb+tion_irreg	computation is to compute as derivation is to	derive	proof	0.2	0	{'proof': 0.2, 'inference': 0.09, 'deduction': 0.06, 'judgment': 0.04, 'argument': 0.03}	497	8.91685e-05	0.200106	0.995047	key	key|target	0.81	TRUE	TRUE	TRUE	target	{'derive': 0.81}
Morphological Modifiers	verb+ment_irreg	agreement is to agree as enlightenment is to	enlighten	ignorance	0.17	0	{'ignorance': 0.17, 'darkness': 0.04, 'illusion': 0.03, 'understanding': 0.03, 'the': 0.02}	24	0.00579834	0.163147	0.999761	key	key|target	0.81	TRUE	TRUE	TRUE	target	{'enlighten': 0.81}
Semantic Hierarchies	hypernyms_misc	desk is to furniture as gasoline is to	fuel	automobile	0.17	0	{'automobile': 0.17, 'car': 0.08, '?': 0.07, 'what': 0.05, 'transportation': 0.04}	7	0.0291748	0.138794	0.99993	key	key|target	0.81	TRUE	TRUE	TRUE	target	{'fuel': 0.81}
Factual Knowledge	name_nationality	lenin is to Soviet as mozart is to	german	music	0.16	0	{'music': 0.16, 'classical': 0.08, 'Mozart': 0.07, 'Bach': 0.03, 'Be': 0.03}	5	0.0291748	0.128052	0.99995	key	key|target	0.81	TRUE	TRUE	TRUE	target	{'german': 0.81}
Semantic Hierarchies	hypernyms_misc	photo is to picture as skirt is to	clothes	dress	0.15	0	{'dress': 0.15, 'pants': 0.06, 'pant': 0.06, '____': 0.05, '______': 0.04}	42	0.00341797	0.150879	0.999581	key	key|target	0.81	TRUE	TRUE	TRUE	target	{'clothes': 0.81}
Semantic Hierarchies	hypernyms_misc	plum is to fruit as vase is to	jar		0.14	0	{'': 0.05, '?': 0.05}	439	5.07832e-05	0.140574	0.995625	key	key|target	0.81	TRUE	TRUE	TRUE	target	{'jar': 0.81}
Semantic Relations	animal_sound	bellow is to moose as chirrup is to	songbird		0.14	0	{'': 0.08, '______': 0.05, ':': 0.04}	174	0.000537872	0.139111	0.998266	key	key|target	0.81	TRUE	TRUE	TRUE	target	{'songbird': 0.81}
Semantic Relations	antonyms_binary	up is to down as outbound is to	inbound	?	0.14	0	{'?': 0.14, '': 0.09, ':': 0.04, 'what': 0.05}	32	0.00521851	0.13443	0.999681	key	key|target	0.81	TRUE	TRUE	TRUE	target	{'inbound': 0.81}
Morphological Modifiers	verb+able_reg	afford is to affordable as edit is to	editable	______	0.13	0	{'______': 0.13, '__': 0.06, '': 0.03, ':': 0.03}	26	0.00778198	0.122101	0.999741	key	key|target	0.81	TRUE	TRUE	TRUE	target	{'editable': 0.81}
Semantic Hierarchies	hypernyms_misc	diary is to journal as sidewalk is to	walk	road	0.13	0	{'road': 0.13, 'pavement': 0.09, '______': 0.07, '__': 0.05, 'street': 0.04}	7	0.0297852	0.104004	0.99993	key	key|target	0.81	TRUE	TRUE	TRUE	target	{'walk': 0.81}
Morphological Modifiers	re+verb_reg	deem is to redeem as organize is to	reorganize		0.12	0	{'': 0.05, 'organize': 0.1, '______': 0.05, 'dis': 0.04}	35	0.0045166	0.112183	0.999651	key	key|target	0.81	TRUE	TRUE	TRUE	target	{'reorganize': 0.81}
Morphological Modifiers	re+verb_reg	emerge is to reemerge as integrate is to	reintegrate	dis	0.12	0	{'dis': 0.12, 'integrate': 0.09, 'separate': 0.05, '': 0.04, 'segreg': 0.04}	26	0.00582886	0.111359	0.999741	key	key|target	0.81	TRUE	TRUE	TRUE	target	{'reintegrate': 0.81}
Semantic Hierarchies	hypernyms_misc	notebook is to book as skirt is to	clothes	dress	0.12	0	{'dress': 0.12, '____': 0.09, 'pant': 0.06, '______': 0.06, 'pants': 0.05}	69	0.00147247	0.123039	0.999312	key	key|target	0.81	TRUE	TRUE	TRUE	target	{'clothes': 0.81}
Semantic Relations	animal_shelter	bat is to cave as seal is to	den		0.11	0	{'': 0.06, ':': 0.06, '_____': 0.05, '?': 0.05}	321	0.000126839	0.11169	0.996801	key	key|target	0.81	TRUE	TRUE	TRUE	target	{'den': 0.81}
Semantic Relations	animal_shelter	fox is to den as termite is to	hill	_____	0.1	0	{'_____': 0.1, '______': 0.09, 'mound': 0.07, '?': 0.06, '': 0.06}	11	0.0206299	0.074585	0.99989	key	key|target	0.81	TRUE	TRUE	TRUE	target	{'hill': 0.81}
Semantic Relations	antonyms_gradable	dry is to wet as sane is to	crazy	insane	0.1	0	{'insane': 0.1, '': 0.04, '______': 0.05, '_____': 0.04}	6	0.0280762	0.0700684	0.99994	key	key|target	0.81	TRUE	TRUE	TRUE	target	{'crazy': 0.81}
Semantic Relations	antonyms_binary	drop is to lift as inverse is to	reverse	divide	0.1	0	{'divide': 0.1, 'inverse': 0.09, 'multiply': 0.05, 'opposite': 0.04, 'division': 0.04}	10	0.0241699	0.0715332	0.9999	key	key|target	0.81	TRUE	TRUE	TRUE	target	{'reverse': 0.81}
Morphological Modifiers	over+adj_reg	charged is to overcharged as confident is to	overconfident	______	0.09	0	{'______': 0.09, '__': 0.04, ':': 0.03, 'timid': 0.03, '': 0.03}	20	0.0131836	0.078125	0.999801	key	key|target	0.81	TRUE	TRUE	TRUE	target	{'overconfident': 0.81}
Morphological Modifiers	comparative	loud is to louder as cheap is to	cheaper	______	0.09	0	{'______': 0.09, '': 0.05, '?': 0.06, ':': 0.06}	5	0.0466309	0.0407715	0.99995	key	key|target	0.81	TRUE	TRUE	TRUE	target	{'cheaper': 0.81}
Semantic Hierarchies	hypernyms_misc	appliance is to toaster as jar is to	vase	______	0.09	0	{'______': 0.09, ':': 0.08, '?': 0.05, '': 0.05, 'what': 0.05}	213	0.000208855	0.0896349	0.997877	key	key|target	0.81	TRUE	TRUE	TRUE	target	{'vase': 0.81}
Semantic Relations	animal_sound	frog is to ribbit as hound is to	bark	wo	0.09	0	{'wo': 0.09, '': 0.05, '?': 0.06, '(': 0.05}	5	0.0378418	0.0529785	0.99995	key	key|target	0.81	TRUE	TRUE	TRUE	target	{'bark': 0.81}
Semantic Relations	animal_sound	elephant is to trumpet as gorilla is to	grunt	roar	0.09	0	{'roar': 0.09, '': 0.05, 'what': 0.06, ':': 0.05}	36	0.00375366	0.0846252	0.999641	key	key|target	0.81	TRUE	TRUE	TRUE	target	{'grunt': 0.81}
Verbal & Grammatical Forms	noun_plural_irreg	families is to family as strategies is to	strategy		0.09	0	{'': 0.06, '______': 0.06, '?': 0.06, '____': 0.04}	29	0.00637817	0.0873718	0.999711	key	key|target	0.81	TRUE	TRUE	TRUE	target	{'strategy': 0.81}
Semantic Relations	animal_sound	frog is to ribbit as monkey is to	chatter		0.08	0	{'': 0.06, 'what': 0.07, 'a': 0.06, '______': 0.05}	66	0.00170135	0.0803299	0.999342	key	key|target	0.81	TRUE	TRUE	TRUE	target	{'chatter': 0.81}
Semantic Hierarchies	hypernyms_misc	croissant is to pastry as vase is to	jar	?	0.07	0	{'?': 0.07, '': 0.05, '__': 0.04, ':': 0.04, 'pottery': 0.04}	155	0.000448227	0.0723057	0.998455	key	key|target	0.81	TRUE	TRUE	TRUE	target	{'jar': 0.81}
Semantic Relations	male_female	mother is to father as madam is to	sir	what	0.07	0	{'what': 0.07, 'gentleman': 0.06, '_': 0.06, '____': 0.04, '': 0.04}	57	0.00273132	0.0719757	0.999432	key	key|target	0.81	TRUE	TRUE	TRUE	target	{'sir': 0.81}
Semantic Relations	animal_sound	elephant is to trumpet as raven is to	caw		0.06	0	{'': 0.06, ':': 0.06, '"': 0.05, '______': 0.04, 'what': 0.04}	586	3.91006e-05	0.0614843	0.994161	key	key|target	0.81	TRUE	TRUE	TRUE	target	{'caw': 0.81}
Semantic Hierarchies	hypernyms_misc	photo is to picture as vase is to	jar	?	0.05	0	{'?': 0.05, '______': 0.05, '': 0.05, '____': 0.03, '__': 0.03}	63	0.00302124	0.0472717	0.999372	key	key|target	0.81	TRUE	TRUE	TRUE	target	{'jar': 0.81}
Semantic Hierarchies	hypernyms_misc	picture is to photo as container is to	tub	______	0.05	0	{'______': 0.05, ':': 0.04, '': 0.04, '_____': 0.04, 'what': 0.03}	295	0.000249863	0.0458927	0.99706	key	key|target	0.81	TRUE	TRUE	TRUE	target	{'tub': 0.81}
Verbal & Grammatical Forms	noun_plural_irreg	histories is to history as opportunities is to	opportunity	chance	0.04	0	{'chance': 0.04, 'reality': 0.03, 'the': 0.02, '': 0.02, 'time': 0.01}	15	0.00994873	0.0271606	0.999851	key	key|target	0.81	TRUE	TRUE	TRUE	target	{'opportunity': 0.81}
Morphological Modifiers	re+verb_reg	examine is to reexamine as publish is to	republish	publish	0.73	0	{'publish': 0.73, 'publication': 0.03, '?': 0.02, '__': 0.01, 'public': 0.01}	11	0.00509644	0.729279	0.99989	key	key|target	0.8	TRUE	TRUE	TRUE	target	{'republish': 0.8}
Morphological Modifiers	re+verb_reg	emerge is to reemerge as establish is to	reestablish	establish	0.68	0	{'establish': 0.68, 'set': 0.05, 'settle': 0.02, 'found': 0.01, 'established': 0.01}	28	0.00152588	0.674255	0.999721	key	key|target	0.8	TRUE	TRUE	TRUE	target	{'reestablish': 0.8}
Morphological Modifiers	re+verb_reg	consider is to reconsider as introduce is to	reintroduce	introduce	0.68	0	{'introduce': 0.68, 'present': 0.03, 'announce': 0.01, 'introduction': 0.01, 'introduced': 0.01}	15	0.00224304	0.677444	0.999851	key	key|target	0.8	TRUE	TRUE	TRUE	target	{'reintroduce': 0.8}
Morphological Modifiers	re+verb_reg	consider is to reconsider as submit is to	resubmit	submit	0.56	0	{'submit': 0.56, 'commit': 0.04, 'submission': 0.01, 'admit': 0.01, 'submitted': 0.01}	6	0.00793457	0.550659	0.99994	key	key|target	0.8	TRUE	TRUE	TRUE	target	{'resubmit': 0.8}
Semantic Relations	antonyms_binary	dead is to alive as fall is to	rise	spring	0.5	0	{'spring': 0.5, 'summer': 0.1, 'winter': 0.04, '__': 0.02, 'what': 0.02}	7	0.0140991	0.481995	0.99993	key	key|target	0.8	TRUE	TRUE	TRUE	target	{'rise': 0.8}
Morphological Modifiers	over+adj_reg	loaded is to overloaded as qualified is to	overqualified	qualified	0.48	0	{'qualified': 0.48, '______': 0.05, '__': 0.04, '': 0.02, 'un': 0.02}	43	0.00158691	0.480835	0.999572	key	key|target	0.8	TRUE	TRUE	TRUE	target	{'overqualified': 0.8}
Semantic Relations	male_female	chairwoman is to chairman as bitch is to	hound	dog	0.46	0	{'dog': 0.46, 'what': 0.08, '______': 0.04, '____': 0.03, 'man': 0.01}	2563	2.14577e-06	0.464842	0.97446	key	key|target	0.8	TRUE	TRUE	TRUE	target	{'hound': 0.8}
Morphological Modifiers	re+verb_reg	consider is to reconsider as engage is to	reengage	engage	0.44	0	{'engage': 0.44, 'eng': 0.03, 'pledge': 0.02, 'dis': 0.02, '': 0.02}	17	0.00408936	0.43927	0.999831	key	key|target	0.8	TRUE	TRUE	TRUE	target	{'reengage': 0.8}
Factual Knowledge	capital_world	Berlin is to Germany as Georgetown is to	guyana	Washington	0.37	0	{'Washington': 0.37, 'the': 0.3, 'D': 0.1, 'DC': 0.07, 'America': 0.02}	77	0.000274658	0.366913	0.999233	key	key|target	0.8	TRUE	TRUE	TRUE	target	{'guyana': 0.8}
Factual Knowledge	capital_world	Cairo is to Egypt as Georgetown is to	guyana	the	0.36	0	{'the': 0.36, 'Washington': 0.34, 'D': 0.06, 'DC': 0.03, 'what': 0.03}	37	0.00109863	0.356323	0.999631	key	key|target	0.8	TRUE	TRUE	TRUE	target	{'guyana': 0.8}
Semantic Relations	animal_sound	mule is to bray as toad is to	ribbit	cro	0.3	0	{'cro': 0.3, 'hop': 0.04, '______': 0.03, '___': 0.03, '____': 0.02}	10	0.0183105	0.286377	0.9999	key	key|target	0.8	TRUE	TRUE	TRUE	target	{'ribbit': 0.8}
Semantic Relations	family	stepdaughter is to stepson as mom is to	dad	son	0.24	0	{'son': 0.24, 'what': 0.08, 'daughter': 0.07, '______': 0.06, '__': 0.04}	5	0.0390625	0.201172	0.99995	key	key|target	0.8	TRUE	TRUE	TRUE	target	{'dad': 0.8}
Semantic Relations	male_female	murderess is to murderer as mare is to	stallion	horse	0.24	0	{'horse': 0.24, '____': 0.11, '_____': 0.08, 'what': 0.06, '______': 0.04}	5	0.0288086	0.212402	0.99995	key	key|target	0.8	TRUE	TRUE	TRUE	target	{'stallion': 0.8}
Verbal & Grammatical Forms	noun_plural_irreg	categories is to category as wives is to	wife	women	0.24	0	{'women': 0.24, 'husbands': 0.17, 'husband': 0.14, 'woman': 0.05, 'men': 0.04}	7	0.0126953	0.226562	0.99993	key	key|target	0.8	TRUE	TRUE	TRUE	target	{'wife': 0.8}
Semantic Relations	antonyms_gradable	clear is to vague as close is to	distant	near	0.22	0	{'near': 0.22, 'shut': 0.2, 'open': 0.05, 'closed': 0.04, 'close': 0.04}	8	0.013855	0.202942	0.99992	key	key|target	0.8	TRUE	TRUE	TRUE	target	{'distant': 0.8}
Factual Knowledge	UK_city_county	bradford is to yorkshire as coventry is to	midlands	war	0.21	0	{'war': 0.21, 'west': 0.15, 'the': 0.09, '______': 0.04, 'what': 0.03}	1585	8.64267e-06	0.207023	0.984206	key	key|target	0.8	TRUE	TRUE	TRUE	target	{'midlands': 0.8}
Morphological Modifiers	verb+able_reg	consider is to considerable as manage is to	manageable	?	0.21	0	{'?': 0.09, '': 0.04, '______': 0.05}	17	0.0126343	0.197327	0.999831	key	key|target	0.8	TRUE	TRUE	TRUE	target	{'manageable': 0.8}
Semantic Relations	antonyms_binary	interior is to exterior as previously is to	subsequently	presently	0.2	0	{'presently': 0.2, 'now': 0.15, 'currently': 0.13, 'future': 0.07, 'present': 0.07}	5	0.0563965	0.146729	0.99995	key	key|target	0.8	TRUE	TRUE	TRUE	target	{'subsequently': 0.8}
Semantic Relations	male_female	batwoman is to batman as bitch is to	hound	dog	0.2	0	{'dog': 0.2, 'man': 0.07, '______': 0.05, 'what': 0.04, '...': 0.04}	8312	6.22123e-07	0.201171	0.917172	key	key|target	0.8	TRUE	TRUE	TRUE	target	{'hound': 0.8}
Morphological Modifiers	verb+er_irreg	eater is to eat as loser is to	lose	winner	0.18	0	{'winner': 0.18, 'loser': 0.1, '______': 0.08, 'win': 0.06, 'what': 0.04}	44	0.00236511	0.173416	0.999562	key	key|target	0.8	TRUE	TRUE	TRUE	target	{'lose': 0.8}
Semantic Relations	animal_shelter	bear is to den as cattle is to	barn	?	0.18	0	{'?': 0.18, '': 0.07, '_____': 0.06, 'pasture': 0.05, '______': 0.05}	7	0.0334473	0.148193	0.99993	key	key|target	0.8	TRUE	TRUE	TRUE	target	{'barn': 0.8}
Factual Knowledge	UK_city_county	leeds is to yorkshire as newport is to	gwent	w	0.17	0	{'w': 0.17, 'glam': 0.1, 'som': 0.1, 'mon': 0.08, 'south': 0.07}	119	0.00037384	0.164665	0.998814	key	key|target	0.8	TRUE	TRUE	TRUE	target	{'gwent': 0.8}
Morphological Modifiers	adj+ly_reg	politically is to political as rarely is to	rare	often	0.16	0	{'often': 0.16, 'frequently': 0.12, 'never': 0.08, 'rarely': 0.04, 'common': 0.04}	5	0.0395508	0.116699	0.99995	key	key|target	0.8	TRUE	TRUE	TRUE	target	{'rare': 0.8}
Semantic Relations	animal_sound	dog is to bark as fly is to	buzz	fly	0.16	0	{'fly': 0.16, 'what': 0.08, '______': 0.07, 'soar': 0.05, '____': 0.04}	16	0.0115967	0.143677	0.999841	key	key|target	0.8	TRUE	TRUE	TRUE	target	{'buzz': 0.8}
Semantic Relations	male_female	boar is to sow as nephew is to	niece	uncle	0.16	0	{'uncle': 0.16, 'sow': 0.12, 'brother': 0.05, '______': 0.04, '_____': 0.04}	6	0.0209961	0.134277	0.99994	key	key|target	0.8	TRUE	TRUE	TRUE	target	{'niece': 0.8}
Verbal & Grammatical Forms	plural_verbs	eat is to eats as describe is to	describes	?	0.16	0	{'?': 0.04, '': 0.04, ':': 0.06}	5	0.0299072	0.132202	0.99995	key	key|target	0.8	TRUE	TRUE	TRUE	target	{'describes': 0.8}
Semantic Hierarchies	hypernyms_misc	pad is to notepad as container is to	tub	container	0.14	0	{'container': 0.14, '?': 0.06, 'what': 0.04, '': 0.04, '______': 0.04}	320	0.00018692	0.140438	0.996811	key	key|target	0.8	TRUE	TRUE	TRUE	target	{'tub': 0.8}
Semantic Hierarchies	hypernyms_misc	brooch is to jewelry as tub is to	container	bathroom	0.14	0	{'bathroom': 0.14, 'bath': 0.08, 'plumbing': 0.05, '______': 0.04, '__': 0.04}	161	0.000396729	0.136322	0.998396	key	key|target	0.8	TRUE	TRUE	TRUE	target	{'container': 0.8}
Semantic Hierarchies	hypernyms_misc	appliance is to blender as fuel is to	gasoline	car	0.14	0	{'car': 0.14, '______': 0.06, 'automobile': 0.06, '?': 0.06, '': 0.05}	87	0.00102234	0.13765	0.999133	key	key|target	0.8	TRUE	TRUE	TRUE	target	{'gasoline': 0.8}
Verbal & Grammatical Forms	noun_plural_reg	governments is to government as periods is to	period	periods	0.14	0	{'periods': 0.14, 'sentences': 0.12, 'history': 0.06, 'sentence': 0.04, 'time': 0.03}	7	0.0163574	0.120361	0.99993	key	key|target	0.8	TRUE	TRUE	TRUE	target	{'period': 0.8}
Morphological Modifiers	verb+ment_irreg	amuse is to amusement as equip is to	equipment		0.13	0	{'': 0.07, '______': 0.08, '?': 0.06, ':': 0.06}	5	0.0559082	0.0700684	0.99995	key	key|target	0.8	TRUE	TRUE	TRUE	target	{'equipment': 0.8}
Semantic Hierarchies	hypernyms_misc	pad is to notepad as cream is to	sunscreen	coffee	0.13	0	{'coffee': 0.13, 'milk': 0.09, '?': 0.04, 'what': 0.03, '_': 0.03}	1412	1.43051e-05	0.126939	0.98593	key	key|target	0.8	TRUE	TRUE	TRUE	target	{'sunscreen': 0.8}
Semantic Relations	animal_sound	frog is to ribbit as songbird is to	chirrup	sing	0.13	0	{'sing': 0.13, '': 0.04, '(': 0.06, '_____': 0.05}	6	0.0410156	0.0927734	0.99994	key	key|target	0.8	TRUE	TRUE	TRUE	target	{'chirrup': 0.8}
Semantic Relations	animal_sound	frog is to ribbit as gorilla is to	grunt	roar	0.13	0	{'roar': 0.13, '': 0.05, 'A': 0.06, 'a': 0.05}	19	0.0101929	0.117737	0.999811	key	key|target	0.8	TRUE	TRUE	TRUE	target	{'grunt': 0.8}
Morphological Modifiers	verb+ment_irreg	amuse is to amusement as enroll is to	enrollment		0.11	0	{'': 0.08, '?': 0.08, ':': 0.06, '______': 0.04}	27	0.00567627	0.101257	0.999731	key	key|target	0.8	TRUE	TRUE	TRUE	target	{'enrollment': 0.8}
Morphological Modifiers	noun+less_reg	bone is to boneless as odor is to	odorless	?	0.11	0	{'?': 0.05, '______': 0.05, '': 0.04}	10	0.0197754	0.0871582	0.9999	key	key|target	0.8	TRUE	TRUE	TRUE	target	{'odorless': 0.8}
Semantic Hierarchies	hypernyms_misc	peach is to fruit as toothbrush is to	brush	tooth	0.11	0	{'tooth': 0.11, '': 0.04, '____': 0.04, '?': 0.04}	17	0.0161133	0.0952148	0.999831	key	key|target	0.8	TRUE	TRUE	TRUE	target	{'brush': 0.8}
Semantic Hierarchies	hypernyms_misc	juicer is to utensil as tub is to	container	__	0.11	0	{'__': 0.11, '______': 0.07, '?': 0.05, '': 0.04, 'what': 0.03}	85	0.00120544	0.104263	0.999153	key	key|target	0.8	TRUE	TRUE	TRUE	target	{'container': 0.8}
Semantic Hierarchies	hypernyms_misc	lemon is to citrus as tub is to	container	?	0.11	0	{'?': 0.04, '?"': 0.06, '': 0.06, 'what': 0.04}	369	7.96318e-05	0.106854	0.996323	key	key|target	0.8	TRUE	TRUE	TRUE	target	{'container': 0.8}
Semantic Relations	antonyms_gradable	big is to small as energetic is to	lethargic	lazy	0.11	0	{'lazy': 0.11, '?': 0.08, '': 0.03, 'calm': 0.02, 'tired': 0.02}	23	0.00939941	0.105347	0.999771	key	key|target	0.8	TRUE	TRUE	TRUE	target	{'lethargic': 0.8}
Verbal & Grammatical Forms	past_tense	fell is to falling as spent is to	spending	______	0.11	0	{'______': 0.11, '__': 0.06, '': 0.04, '_____': 0.04, '?': 0.04}	9	0.0209961	0.0854492	0.99991	key	key|target	0.8	TRUE	TRUE	TRUE	target	{'spending': 0.8}
Verbal & Grammatical Forms	noun_plural_reg	websites is to website as weeks is to	week	year	0.11	0	{'year': 0.11, 'month': 0.06, 'years': 0.06, 'days': 0.05, 'day': 0.05}	14	0.0164795	0.0982666	0.99986	key	key|target	0.8	TRUE	TRUE	TRUE	target	{'week': 0.8}
Morphological Modifiers	verb+er_irreg	baker is to bake as borrower is to	borrow	______	0.1	0	{'______': 0.1, '_____': 0.07, 'lender': 0.07, '____': 0.05, '': 0.04}	38	0.00334167	0.100662	0.999621	key	key|target	0.8	TRUE	TRUE	TRUE	target	{'borrow': 0.8}
Semantic Hierarchies	hypernyms_misc	journal is to diary as card is to	postcard	____	0.1	0	{'____': 0.1, '__': 0.09, '______': 0.06, '_____': 0.05, '___': 0.04}	7	0.017334	0.0827637	0.99993	key	key|target	0.8	TRUE	TRUE	TRUE	target	{'postcard': 0.8}
Semantic Hierarchies	hypernyms_misc	cake is to dessert as tub is to	container	?	0.1	0	{'?': 0.1, 'bath': 0.08, '?"': 0.05, 'bathroom': 0.05, 'what': 0.05}	178	0.000253677	0.0954494	0.998226	key	key|target	0.8	TRUE	TRUE	TRUE	target	{'container': 0.8}
Semantic Hierarchies	hypernyms_misc	appliance is to fridge as card is to	postcard	____	0.1	0	{'____': 0.1, '______': 0.05, '___': 0.05, '__': 0.05, ':': 0.05}	155	0.000429153	0.101622	0.998455	key	key|target	0.8	TRUE	TRUE	TRUE	target	{'postcard': 0.8}
Semantic Relations	animal_shelter	ape is to grove as herring is to	sea	______	0.1	0	{'______': 0.1, '?': 0.07, '': 0.07, '_____': 0.06, 'a': 0.03}	80	0.00128174	0.100281	0.999203	key	key|target	0.8	TRUE	TRUE	TRUE	target	{'sea': 0.8}
Semantic Relations	antonyms_binary	subsequently is to previously as southwest is to	southeast		0.1	0	{'': 0.05, 'west': 0.08, 'north': 0.06, 'northwest': 0.04}	18	0.0125732	0.0865479	0.999821	key	key|target	0.8	TRUE	TRUE	TRUE	target	{'southeast': 0.8}
Semantic Relations	male_female	actor is to actress as nephew is to	niece	what	0.1	0	{'what': 0.1, '?': 0.07, '______': 0.05, '____': 0.05, ':': 0.05}	9	0.0378418	0.0588379	0.99991	key	key|target	0.8	TRUE	TRUE	TRUE	target	{'niece': 0.8}
Verbal & Grammatical Forms	plural_verbs	talk is to talks as describe is to	describes	______	0.1	0	{'______': 0.1, '__': 0.06, '____': 0.05, 'what': 0.04, '_____': 0.04}	11	0.0281982	0.0704346	0.99989	key	key|target	0.8	TRUE	TRUE	TRUE	target	{'describes': 0.8}
Morphological Modifiers	adj+ness_reg	connectedness is to connected as usefulness is to	useful	useless	0.09	0	{'useless': 0.09, '______': 0.09, '__': 0.06, '': 0.05, 'usefulness': 0.04}	6	0.0390625	0.0488281	0.99994	key	key|target	0.8	TRUE	TRUE	TRUE	target	{'useful': 0.8}
Semantic Hierarchies	hypernyms_misc	makeup is to mascara as jar is to	vase	lid	0.09	0	{'lid': 0.09, '____': 0.08, '______': 0.07, ':': 0.05, '___': 0.04}	362	0.000100136	0.0868139	0.996393	key	key|target	0.8	TRUE	TRUE	TRUE	target	{'vase': 0.8}
Semantic Relations	animal_sound	elephant is to trumpet as monkey is to	chatter		0.09	0	{'': 0.09, 'what': 0.08, 'sc': 0.08, ':': 0.06, '_____': 0.05}	22	0.00744629	0.0780029	0.999781	key	key|target	0.8	TRUE	TRUE	TRUE	target	{'chatter': 0.8}
Semantic Relations	male_female	lioness is to lion as madam is to	sir		0.09	0	{'': 0.07, '?': 0.07, 'what': 0.05, ':': 0.04}	60	0.00189209	0.0864868	0.999402	key	key|target	0.8	TRUE	TRUE	TRUE	target	{'sir': 0.8}
Semantic Relations	male_female	mare is to stallion as webmistress is to	webmaster	______	0.09	0	{'______': 0.09, '': 0.04, '__': 0.05, 'what': 0.05}	8	0.0412598	0.0515137	0.99992	key	key|target	0.8	TRUE	TRUE	TRUE	target	{'webmaster': 0.8}
Verbal & Grammatical Forms	plural	mangoes is to mango as children is to	child	______	0.09	0	{'______': 0.09, 'parents': 0.04, 'children': 0.04, '': 0.03, '"': 0.03}	6	0.0289307	0.0604248	0.99994	key	key|target	0.8	TRUE	TRUE	TRUE	target	{'child': 0.8}
Morphological Modifiers	un+adj_reg	affected is to unaffected as interrupted is to	uninterrupted	interrupted	0.08	0	{'interrupted': 0.08, '': 0.06, '__': 0.04, '______': 0.04, 'continuous': 0.04}	6	0.0286865	0.0543213	0.99994	key	key|target	0.8	TRUE	TRUE	TRUE	target	{'uninterrupted': 0.8}
Semantic Relations	animal_sound	cricket is to chirp as fox is to	howl	_____	0.08	0	{'_____': 0.08, '______': 0.07, '__': 0.05, '___': 0.04, '': 0.03}	36	0.00567627	0.0778198	0.999641	key	key|target	0.8	TRUE	TRUE	TRUE	target	{'howl': 0.8}
Semantic Relations	animal_sound	pigeon is to coo as whale is to	sing		0.08	0	{'': 0.07, '_____': 0.06, '______': 0.04, '"': 0.03}	15	0.0142822	0.067749	0.999851	key	key|target	0.8	TRUE	TRUE	TRUE	target	{'sing': 0.8}
Semantic Relations	antonyms_binary	anterior is to posterior as dive is to	emerge		0.08	0	{'': 0.08, '"': 0.06, 'soar': 0.05, '______': 0.05, '?': 0.05}	36	0.00454712	0.0760193	0.999641	key	key|target	0.8	TRUE	TRUE	TRUE	target	{'emerge': 0.8}
Semantic Relations	male_female	king is to queen as waiter is to	waitress	?	0.08	0	{'?': 0.06, '____': 0.07, 'what': 0.07, ':': 0.06}	17	0.0134888	0.0617065	0.999831	key	key|target	0.8	TRUE	TRUE	TRUE	target	{'waitress': 0.8}
Semantic Relations	male_female	son is to daughter as waiter is to	waitress	what	0.08	0	{'what': 0.08, '______': 0.07, 'customer': 0.07, '____': 0.05, '__': 0.05}	7	0.0390625	0.0439453	0.99993	key	key|target	0.8	TRUE	TRUE	TRUE	target	{'waitress': 0.8}
Semantic Hierarchies	hypernyms_misc	notebook is to book as perfume is to	toiletry	______	0.07	0	{'______': 0.07, 'perfume': 0.05, 'flower': 0.04, 'rose': 0.04, '__': 0.04}	89	0.00107574	0.0653305	0.999113	key	key|target	0.8	TRUE	TRUE	TRUE	target	{'toiletry': 0.8}
Semantic Relations	animal_sound	deer is to bellow as monkey is to	chatter		0.07	0	{'': 0.04, 'sc': 0.06, '______': 0.04, 'h': 0.04}	7	0.0290527	0.045166	0.99993	key	key|target	0.8	TRUE	TRUE	TRUE	target	{'chatter': 0.8}
Semantic Relations	animal_sound	frog is to ribbit as goat is to	bleat	?	0.07	0	{'?': 0.07, '______': 0.06, '': 0.05, ':': 0.05}	7	0.0366211	0.0317383	0.99993	key	key|target	0.8	TRUE	TRUE	TRUE	target	{'bleat': 0.8}
Semantic Relations	animal_sound	ferret is to dook as magpie is to	chatter	____	0.07	0	{'____': 0.07, '______': 0.06, '_____': 0.05, '__': 0.04, 'a': 0.04}	24	0.0065918	0.064209	0.999761	key	key|target	0.8	TRUE	TRUE	TRUE	target	{'chatter': 0.8}
Semantic Relations	animal_sound	trumpet is to elephant as baa is to	sheep	_____	0.07	0	{'_____': 0.07, '': 0.06, '______': 0.05, '____': 0.05, 'what': 0.05}	8	0.0339355	0.0378418	0.99992	key	key|target	0.8	TRUE	TRUE	TRUE	target	{'sheep': 0.8}
Morphological Modifiers	re+verb_reg	invest is to reinvest as organize is to	reorganize		0.06	0	{'': 0.03, '______': 0.05, 'organize': 0.05, '__': 0.03}	20	0.00695801	0.0511475	0.999801	key	key|target	0.8	TRUE	TRUE	TRUE	target	{'reorganize': 0.8}
Semantic Hierarchies	hypernyms_misc	appliance is to blender as fabric is to	denim	?	0.06	0	{'?': 0.06, '______': 0.05, 'lo': 0.04, 'what': 0.04, '': 0.04}	836	4.95911e-05	0.0614738	0.991669	key	key|target	0.8	TRUE	TRUE	TRUE	target	{'denim': 0.8}
Semantic Relations	animal_sound	ferret is to dook as seal is to	bark		0.06	0	{'': 0.06, '"': 0.03, '?': 0.03, ':': 0.03}	5	0.0255127	0.0394287	0.99995	key	key|target	0.8	TRUE	TRUE	TRUE	target	{'bark': 0.8}
Semantic Relations	antonyms_binary	after is to before as dive is to	emerge	?	0.06	0	{'?': 0.06, '______': 0.06, 'what': 0.05, '': 0.04, 'swim': 0.03}	57	0.00242615	0.0527496	0.999432	key	key|target	0.8	TRUE	TRUE	TRUE	target	{'emerge': 0.8}
Verbal & Grammatical Forms	noun_plural_irreg	category is to categories as responsibility is to	responsibilities	responsibility	0.06	0	{'responsibility': 0.06, 'accountability': 0.05, 'people': 0.04, 'individuals': 0.03, 'a': 0.03}	11	0.0137329	0.0441284	0.99989	key	key|target	0.8	TRUE	TRUE	TRUE	target	{'responsibilities': 0.8}
Semantic Hierarchies	hypernyms_misc	appliance is to fridge as pad is to	notepad	______	0.04	0	{'______': 0.04, '____': 0.04, 'laptop': 0.04, '___': 0.04, '': 0.04}	27	0.00793457	0.0323486	0.999731	key	key|target	0.8	TRUE	TRUE	TRUE	target	{'notepad': 0.8}
Semantic Relations	male_female	husband is to wife as ram is to	ewe	sit	0.57	0	{'sit': 0.57, 's': 0.08, 'se': 0.03, '______': 0.02, 'whom': 0.02}	20700	3.91155e-08	0.574219	0.793726	key	key|target	0.79	TRUE	TRUE	TRUE	target	{'ewe': 0.79}
Morphological Modifiers	re+verb_reg	deem is to redeem as establish is to	reestablish	establish	0.51	0	{'establish': 0.51, '': 0.02, 'found': 0.03, '__': 0.03}	84	0.000701904	0.511017	0.999163	key	key|target	0.79	TRUE	TRUE	TRUE	target	{'reestablish': 0.79}
Factual Knowledge	name_nationality	euclid is to Greek as lennon is to	english	beat	0.42	0	{'beat': 0.42, 'Beat': 0.06, 'wal': 0.05, 'Beatles': 0.04, 'the': 0.02}	7	0.0154419	0.408386	0.99993	key	key|target	0.79	TRUE	TRUE	TRUE	target	{'english': 0.79}
Morphological Modifiers	re+verb_reg	decorate is to redecorate as emerge is to	reemerge	emerge	0.41	0	{'emerge': 0.41, 'em': 0.06, 'immer': 0.06, 'merge': 0.05, 'sub': 0.02}	15	0.00473022	0.407379	0.999851	key	key|target	0.79	TRUE	TRUE	TRUE	target	{'reemerge': 0.79}
Semantic Relations	antonyms_binary	inhale is to exhale as inverse is to	reverse	direct	0.41	0	{'direct': 0.41, 'reciprocal': 0.15, 'multip': 0.03, 'inverse': 0.02, 'what': 0.02}	26	0.00389099	0.406265	0.999741	key	key|target	0.79	TRUE	TRUE	TRUE	target	{'reverse': 0.79}
Semantic Relations	antonyms_binary	before is to after as inverse is to	reverse	direct	0.32	0	{'direct': 0.32, 'inverse': 0.1, 'what': 0.02, 'division': 0.02, 'itself': 0.01}	6	0.0110474	0.311218	0.99994	key	key|target	0.79	TRUE	TRUE	TRUE	target	{'reverse': 0.79}
Factual Knowledge	capital_world	Pakistan is to Islamabad as Oman is to	muscat	?	0.25	0	{'?': 0.06, ':': 0.06}	20	0.00668335	0.243317	0.999801	key	key|target	0.79	TRUE	TRUE	TRUE	target	{'muscat': 0.79}
Semantic Relations	animal_shelter	fox is to den as goldfish is to	pond	bowl	0.22	0	{'bowl': 0.22, 'tank': 0.12, '______': 0.06, '?': 0.05, '': 0.04}	19	0.0065918	0.218018	0.999811	key	key|target	0.79	TRUE	TRUE	TRUE	target	{'pond': 0.79}
Semantic Relations	antonyms_gradable	clean is to dirty as warm is to	cool	cold	0.22	0	{'cold': 0.22, 'hot': 0.16, '': 0.04, '______': 0.03}	6	0.0236816	0.200928	0.99994	key	key|target	0.79	TRUE	TRUE	TRUE	target	{'cool': 0.79}
Verbal & Grammatical Forms	noun_plural_irreg	category is to categories as life is to	lives	the	0.21	0	{'the': 0.21, 'living': 0.06, 'a': 0.04, 'biology': 0.04, 'matter': 0.03}	228	0.000228882	0.214615	0.997728	key	key|target	0.79	TRUE	TRUE	TRUE	target	{'lives': 0.79}
Semantic Hierarchies	hypernyms_misc	bracelet is to jewelry as tub is to	container	bathroom	0.18	0	{'bathroom': 0.18, 'bath': 0.05, 'plumbing': 0.04, '__': 0.04, '': 0.03}	127	0.000545502	0.176212	0.998734	key	key|target	0.79	TRUE	TRUE	TRUE	target	{'container': 0.79}
Semantic Hierarchies	hypernyms_misc	walk is to sidewalk as container is to	tub	?	0.16	0	{'?': 0.04, ':': 0.07, '': 0.06, '______': 0.05}	681	3.52859e-05	0.163051	0.993214	key	key|target	0.79	TRUE	TRUE	TRUE	target	{'tub': 0.79}
Semantic Hierarchies	hypernyms_misc	jeans is to trousers as vase is to	jar	?	0.16	0	{'?': 0.06, '': 0.05, '_': 0.04}	48	0.00280762	0.160278	0.999522	key	key|target	0.79	TRUE	TRUE	TRUE	target	{'jar': 0.79}
Semantic Relations	animal_shelter	seal is to den as woodchuck is to	hole	ground	0.15	0	{'ground': 0.15, 'bur': 0.1, 'm': 0.05, '': 0.05}	24	0.00564575	0.148651	0.999761	key	key|target	0.79	TRUE	TRUE	TRUE	target	{'hole': 0.79}
Semantic Relations	animal_shelter	cricket is to nest as goldfish is to	pond	bowl	0.15	0	{'bowl': 0.15, '__': 0.07, '______': 0.06, 'tank': 0.05, '_____': 0.05}	21	0.00836182	0.139099	0.999791	key	key|target	0.79	TRUE	TRUE	TRUE	target	{'pond': 0.79}
Semantic Relations	antonyms_binary	off is to on as submerge is to	emerge		0.14	0	{'': 0.08, '?': 0.06, ':': 0.05, '"': 0.03}	11	0.020874	0.114868	0.99989	key	key|target	0.79	TRUE	TRUE	TRUE	target	{'emerge': 0.79}
Morphological Modifiers	noun+less_reg	remorse is to remorseless as wit is to	witless	______	0.13	0	{'______': 0.13, '_____': 0.05, '': 0.04, '____': 0.04}	8	0.0245361	0.108276	0.99992	key	key|target	0.79	TRUE	TRUE	TRUE	target	{'witless': 0.79}
Semantic Relations	animal_sound	fly is to buzz as fox is to	howl	bark	0.13	0	{'bark': 0.13, '_____': 0.05, 'what': 0.04, '______': 0.04, '': 0.03}	12	0.0161133	0.109863	0.99988	key	key|target	0.79	TRUE	TRUE	TRUE	target	{'howl': 0.79}
Morphological Modifiers	verb+able_reg	afford is to affordable as represent is to	representable	representative	0.12	0	{'representative': 0.12, 'representation': 0.08, '______': 0.05, '__': 0.05, '': 0.04}	6	0.0371094	0.0844727	0.99994	key	key|target	0.79	TRUE	TRUE	TRUE	target	{'representable': 0.79}
Morphological Modifiers	over+adj_reg	overdone is to done as oversized is to	sized	oversized	0.12	0	{'oversized': 0.12, 'too': 0.03, '______': 0.03, 'unders': 0.03, 'over': 0.03}	7	0.0253906	0.0957031	0.99993	key	key|target	0.79	TRUE	TRUE	TRUE	target	{'sized': 0.79}
Semantic Relations	antonyms_gradable	simple is to difficult as tasty is to	tasteless	delicious	0.12	0	{'delicious': 0.12, 'y': 0.05, 'bland': 0.04, '______': 0.04, 'salty': 0.03}	33	0.00491333	0.114227	0.999671	key	key|target	0.79	TRUE	TRUE	TRUE	target	{'tasteless': 0.79}
Semantic Relations	antonyms_binary	on is to off as under is to	over	?	0.12	0	{'?': 0.05, 'what': 0.06, '': 0.06, 'under': 0.05}	29	0.00735474	0.10788	0.999711	key	key|target	0.79	TRUE	TRUE	TRUE	target	{'over': 0.79}
Morphological Modifiers	over+adj_reg	done is to overdone as qualified is to	overqualified	______	0.11	0	{'______': 0.11, 'un': 0.1, '__': 0.04, '____': 0.03, 'dis': 0.03}	7	0.0247803	0.0865479	0.99993	key	key|target	0.79	TRUE	TRUE	TRUE	target	{'overqualified': 0.79}
Morphological Modifiers	verb+able_reg	afford is to affordable as survive is to	survivable	______	0.11	0	{'______': 0.11, '__': 0.04, '?': 0.03, '': 0.03, ':': 0.03}	31	0.00866699	0.0968018	0.999691	key	key|target	0.79	TRUE	TRUE	TRUE	target	{'survivable': 0.79}
Morphological Modifiers	over+adj_reg	overprotective is to protective as oversimplified is to	simplified	:	0.11	0	{':': 0.05, '______': 0.05, '"': 0.04}	7	0.0244141	0.0849609	0.99993	key	key|target	0.79	TRUE	TRUE	TRUE	target	{'simplified': 0.79}
Semantic Hierarchies	hypernyms_misc	croissant is to pastry as notebook is to	book	?	0.11	0	{'?': 0.11, 'computer': 0.1, '?"': 0.04, 'what': 0.04, '_': 0.04}	24	0.00921631	0.0996704	0.999761	key	key|target	0.79	TRUE	TRUE	TRUE	target	{'book': 0.79}
Semantic Hierarchies	hypernyms_misc	blender is to appliance as perfume is to	toiletry	fragrance	0.11	0	{'fragrance': 0.11, '______': 0.08, 'perfume': 0.07, '__': 0.05, '': 0.05}	25	0.00704956	0.103302	0.999751	key	key|target	0.79	TRUE	TRUE	TRUE	target	{'toiletry': 0.79}
Semantic Relations	animal_sound	beetle is to drone as goat is to	bleat	______	0.11	0	{'______': 0.11, '_____': 0.07, '': 0.04, '____': 0.05}	8	0.0272217	0.0806885	0.99992	key	key|target	0.79	TRUE	TRUE	TRUE	target	{'bleat': 0.79}
Morphological Modifiers	re+verb_reg	assure is to reassure as decorate is to	redecorate		0.1	0	{'': 0.06, '?': 0.1, 'decorate': 0.05, '______': 0.03}	18	0.0110474	0.0934448	0.999821	key	key|target	0.79	TRUE	TRUE	TRUE	target	{'redecorate': 0.79}
Semantic Hierarchies	hypernyms_misc	dessert is to cake as food is to	pastry	"	0.1	0	{'"': 0.1, 'meal': 0.05, 'what': 0.05, '______': 0.04, 'food': 0.03}	497	9.25064e-05	0.098052	0.995047	key	key|target	0.79	TRUE	TRUE	TRUE	target	{'pastry': 0.79}
Semantic Hierarchies	hypernyms_misc	appliance is to fridge as pin is to	hairpin	______	0.1	0	{'______': 0.1, '____': 0.08, '_____': 0.06, '': 0.03, '___': 0.03}	223	0.000276566	0.100798	0.997778	key	key|target	0.79	TRUE	TRUE	TRUE	target	{'hairpin': 0.79}
Semantic Relations	animal_sound	beetle is to drone as toad is to	ribbit	______	0.1	0	{'______': 0.1, 'frog': 0.04, '': 0.04, 'to': 0.04, 'what': 0.04}	66	0.00201416	0.0951538	0.999342	key	key|target	0.79	TRUE	TRUE	TRUE	target	{'ribbit': 0.79}
Semantic Relations	animal_sound	dook is to ferret as oink is to	pig	_____	0.1	0	{'_____': 0.1, '______': 0.08, '': 0.05, '___': 0.05}	8	0.0407715	0.0568848	0.99992	key	key|target	0.79	TRUE	TRUE	TRUE	target	{'pig': 0.79}
Semantic Relations	animal_sound	elk is to bellow as whale is to	sing	?	0.1	0	{'?': 0.1, '': 0.06, '_____': 0.05, '______': 0.04}	12	0.019043	0.0776367	0.99988	key	key|target	0.79	TRUE	TRUE	TRUE	target	{'sing': 0.79}
Factual Knowledge	capital_world	Kenya is to Nairobi as Tunisia is to	tunis	:	0.09	0	{':': 0.08, '': 0.08, '?': 0.06, 'what': 0.05}	14	0.0168457	0.0686035	0.99986	key	key|target	0.79	TRUE	TRUE	TRUE	target	{'tunis': 0.79}
Semantic Hierarchies	hypernyms_misc	blender is to appliance as sunscreen is to	cream		0.09	0	{'': 0.09, '______': 0.07, 'what': 0.07, '_____': 0.04, ':': 0.04}	181	0.000282288	0.0871201	0.998196	key	key|target	0.79	TRUE	TRUE	TRUE	target	{'cream': 0.79}
Semantic Relations	animal_shelter	bear is to den as dog is to	doghouse	kenn	0.09	0	{'kenn': 0.09, '_____': 0.06, '?': 0.05, 'bone': 0.05, ':': 0.04}	8	0.0322266	0.0551758	0.99992	key	key|target	0.79	TRUE	TRUE	TRUE	target	{'doghouse': 0.79}
Semantic Relations	animal_sound	wasp is to buzz as whale is to	sing		0.09	0	{'': 0.06, '?': 0.08, '_____': 0.05, '______': 0.04}	22	0.00842285	0.0853271	0.999781	key	key|target	0.79	TRUE	TRUE	TRUE	target	{'sing': 0.79}
Morphological Modifiers	verb+ment_irreg	advertise is to advertisement as enroll is to	enrollment		0.08	0	{'': 0.04, '?': 0.08, ':': 0.04, '______': 0.03}	5	0.0336914	0.046875	0.99995	key	key|target	0.79	TRUE	TRUE	TRUE	target	{'enrollment': 0.79}
Morphological Modifiers	over+adj_reg	crowded is to overcrowded as stretched is to	overstretched	stretched	0.08	0	{'stretched': 0.08, '______': 0.06, '?': 0.06, 'what': 0.06, '': 0.06}	16	0.0134888	0.0641479	0.999841	key	key|target	0.79	TRUE	TRUE	TRUE	target	{'overstretched': 0.79}
Morphological Modifiers	adj+ly_reg	clinical is to clinically as immediate is to	immediately	______	0.08	0	{'______': 0.08, '': 0.04, 'delayed': 0.06, '?': 0.04}	18	0.00994873	0.0730591	0.999821	key	key|target	0.79	TRUE	TRUE	TRUE	target	{'immediately': 0.79}
Semantic Hierarchies	hypernyms_misc	toiletry is to deodorant as picture is to	photo	frame	0.08	0	{'frame': 0.08, '': 0.05, 'painting': 0.04, '______': 0.04, 'canvas': 0.03}	30	0.00689697	0.0770874	0.999701	key	key|target	0.79	TRUE	TRUE	TRUE	target	{'photo': 0.79}
Semantic Relations	animal_sound	bark is to hound as chirrup is to	songbird		0.08	0	{'': 0.07, '______': 0.07, '_____': 0.05, 'bird': 0.04}	72	0.00204468	0.0746155	0.999283	key	key|target	0.79	TRUE	TRUE	TRUE	target	{'songbird': 0.79}
Semantic Relations	antonyms_binary	beginning is to end as dive is to	emerge	swim	0.08	0	{'swim': 0.08, '______': 0.04, 'surface': 0.04, 'soar': 0.04, 'fly': 0.02}	93	0.00131226	0.0797424	0.999073	key	key|target	0.79	TRUE	TRUE	TRUE	target	{'emerge': 0.79}
Semantic Relations	male_female	lady is to gentleman as headmistress is to	headmaster	_	0.08	0	{'_': 0.08, '': 0.07, '______': 0.06, '__': 0.06, 'what': 0.06}	9	0.0314941	0.0441895	0.99991	key	key|target	0.79	TRUE	TRUE	TRUE	target	{'headmaster': 0.79}
Semantic Hierarchies	hypernyms_misc	computer is to device as cup is to	tableware	?	0.07	0	{'?': 0.07, 'glass': 0.06, '_____': 0.04, 'mug': 0.04, '______': 0.04}	39	0.00518799	0.0621948	0.999611	key	key|target	0.79	TRUE	TRUE	TRUE	target	{'tableware': 0.79}
Semantic Hierarchies	hypernyms_misc	desk is to furniture as sunscreen is to	cream	?	0.07	0	{'?': 0.07, 'what': 0.06, '_': 0.06, '_____': 0.06, ':': 0.06}	785	1.83582e-05	0.0668762	0.992178	key	key|target	0.79	TRUE	TRUE	TRUE	target	{'cream': 0.79}
Semantic Relations	animal_sound	mule is to bray as seal is to	bark		0.07	0	{'': 0.07, '_____': 0.05, '______': 0.03, '?': 0.03}	13	0.019165	0.052124	0.99987	key	key|target	0.79	TRUE	TRUE	TRUE	target	{'bark': 0.79}
Semantic Relations	antonyms_binary	immortal is to mortal as away is to	toward	home	0.07	0	{'home': 0.07, '_____': 0.04, '______': 0.03, 'what': 0.03, 'towards': 0.03}	5	0.0296631	0.0372314	0.99995	key	key|target	0.79	TRUE	TRUE	TRUE	target	{'toward': 0.79}
Semantic Relations	antonyms_binary	after is to before as sink is to	rise	drain	0.07	0	{'drain': 0.07, '': 0.04, '?': 0.03, 'water': 0.03, 'what': 0.03}	161	0.000656128	0.0706329	0.998396	key	key|target	0.79	TRUE	TRUE	TRUE	target	{'rise': 0.79}
Semantic Relations	male_female	lioness is to lion as miss is to	mister		0.07	0	{'': 0.04, 'what': 0.06, '____': 0.05, '?': 0.04}	65	0.00224304	0.0695343	0.999352	key	key|target	0.79	TRUE	TRUE	TRUE	target	{'mister': 0.79}
Semantic Relations	male_female	nephew is to niece as ram is to	ewe	?	0.07	0	{'?': 0.07, 'lamb': 0.07, '': 0.03, '____': 0.04}	1274	1.36495e-05	0.065416	0.987305	key	key|target	0.79	TRUE	TRUE	TRUE	target	{'ewe': 0.79}
Verbal & Grammatical Forms	noun_plural_reg	colleges is to college as years is to	year	years	0.07	0	{'years': 0.07, 'centuries': 0.06, 'a': 0.04, 'decades': 0.04, 'century': 0.04}	24	0.00958252	0.057312	0.999761	key	key|target	0.79	TRUE	TRUE	TRUE	target	{'year': 0.79}
Verbal & Grammatical Forms	noun_plural_reg	problems is to problem as roads is to	road	______	0.07	0	{'______': 0.07, 'city': 0.06, 'traffic': 0.05, 'cities': 0.04, '': 0.04}	13	0.0114746	0.0588379	0.99987	key	key|target	0.79	TRUE	TRUE	TRUE	target	{'road': 0.79}
Morphological Modifiers	over+adj_reg	filled is to overfilled as sized is to	oversized	sized	0.06	0	{'sized': 0.06, '': 0.05, '?': 0.05, 'what': 0.05}	5	0.0476074	0.0100098	0.99995	key	key|target	0.79	TRUE	TRUE	TRUE	target	{'oversized': 0.79}
Semantic Relations	animal_shelter	trout is to river as woodchuck is to	hole	?	0.06	0	{'?': 0.06, '': 0.04, 'field': 0.04, '_____': 0.04}	39	0.0055542	0.0505981	0.999611	key	key|target	0.79	TRUE	TRUE	TRUE	target	{'hole': 0.79}
Semantic Relations	antonyms_gradable	bright is to pale as organized is to	unorganized		0.06	0	{'': 0.05, '______': 0.05, '_____': 0.04, 'chaotic': 0.03}	19	0.0117798	0.0521851	0.999811	key	key|target	0.79	TRUE	TRUE	TRUE	target	{'unorganized': 0.79}
Verbal & Grammatical Forms	noun_plural_irreg	century is to centuries as technology is to	technologies	tools	0.06	0	{'tools': 0.06, 'the': 0.05, 'science': 0.05, '__': 0.03, 'what': 0.03}	14	0.0106201	0.050415	0.99986	key	key|target	0.79	TRUE	TRUE	TRUE	target	{'technologies': 0.79}
Morphological Modifiers	adj_comparative	rockier is to rocky as stronger is to	strong	______	0.05	0	{'______': 0.05, ':': 0.04, '': 0.04, 'weak': 0.04, '?"': 0.04}	19	0.0187988	0.0356445	0.999811	key	key|target	0.79	TRUE	TRUE	TRUE	target	{'strong': 0.79}
Semantic Relations	antonyms_gradable	big is to small as decisive is to	hesitating	decisive	0.05	0	{'decisive': 0.05, '?': 0.05, 'what': 0.03, '______': 0.03, 'incon': 0.03}	55	0.00335693	0.0459595	0.999452	key	key|target	0.79	TRUE	TRUE	TRUE	target	{'hesitating': 0.79}
Semantic Relations	antonyms_binary	inside is to outside as outward is to	upward	inward	0.89	0	{'inward': 0.89, 'in': 0.01, 'inside': 0.01, 'outward': 0.01, 'inner': 0.0}	12	0.00189209	0.888733	0.99988	key	key|target	0.78	TRUE	TRUE	TRUE	target	{'upward': 0.78}
Factual Knowledge	UK_city_county	lancaster is to lancashire as leicester is to	midlands	le	0.75	0	{'le': 0.75, 'what': 0.02, '______': 0.02, 'where': 0.01, '': 0.01}	11830	3.88827e-08	0.753906	0.882115	key	key|target	0.78	TRUE	TRUE	TRUE	target	{'midlands': 0.78}
Factual Knowledge	country_capital	Belgium is to Brussels as Georgia is to	tbilisi	Atlanta	0.73	0	{'Atlanta': 0.73, '__': 0.04, '______': 0.03, '...': 0.01, '?': 0.01}	475	1.54972e-05	0.73436	0.995267	key	key|target	0.78	TRUE	TRUE	TRUE	target	{'tbilisi': 0.78}
Factual Knowledge	name_nationality	kant is to German as maxwell is to	scottish	English	0.66	0	{'English': 0.66, 'British': 0.06, 'American': 0.03, 'english': 0.02, 'SI': 0.02}	14	0.00334167	0.652908	0.99986	key	key|target	0.78	TRUE	TRUE	TRUE	target	{'scottish': 0.78}
Morphological Modifiers	re+verb_reg	establish is to reestablish as integrate is to	reintegrate	integrate	0.54	0	{'integrate': 0.54, 'dis': 0.08, 'incorporate': 0.02, 'integration': 0.02, 'unite': 0.02}	8	0.010498	0.528564	0.99992	key	key|target	0.78	TRUE	TRUE	TRUE	target	{'reintegrate': 0.78}
Semantic Hierarchies	hypernyms_misc	pin is to hairpin as trousers is to	jeans	pant	0.54	0	{'pant': 0.54, 'pants': 0.05, '______': 0.05, '____': 0.02, '_': 0.02}	26	0.00334167	0.539627	0.999741	key	key|target	0.78	TRUE	TRUE	TRUE	target	{'jeans': 0.78}
Semantic Relations	male_female	headmistress is to headmaster as bitch is to	hound	dog	0.47	0	{'dog': 0.47, 'what': 0.06, '______': 0.05, 'bastard': 0.03, '____': 0.03}	6512	5.81145e-07	0.474609	0.935108	key	key|target	0.78	TRUE	TRUE	TRUE	target	{'hound': 0.78}
Verbal & Grammatical Forms	noun_plural_irreg	century is to centuries as strategy is to	strategies	tactics	0.46	0	{'tactics': 0.46, 'plans': 0.03, 'planning': 0.02, 'war': 0.02, '__': 0.02}	11	0.0090332	0.455811	0.99989	key	key|target	0.78	TRUE	TRUE	TRUE	target	{'strategies': 0.78}
Morphological Modifiers	re+verb_reg	connect is to reconnect as locate is to	relocate	locate	0.42	0	{'locate': 0.42, 'location': 0.1, 'find': 0.05, 'search': 0.02, 'look': 0.02}	18	0.00390625	0.419922	0.999821	key	key|target	0.78	TRUE	TRUE	TRUE	target	{'relocate': 0.78}
Morphological Modifiers	re+verb_reg	examine is to reexamine as integrate is to	reintegrate	integrate	0.37	0	{'integrate': 0.37, '': 0.05, 'combine': 0.04, '__': 0.03}	5	0.0206299	0.344604	0.99995	key	key|target	0.78	TRUE	TRUE	TRUE	target	{'reintegrate': 0.78}
Factual Knowledge	country_capital	Canada is to Ottawa as Georgia is to	tbilisi	Atlanta	0.35	0	{'Atlanta': 0.35, '__': 0.06, '______': 0.06, '?': 0.03, '?"': 0.03}	309	5.79357e-05	0.353458	0.996921	key	key|target	0.78	TRUE	TRUE	TRUE	target	{'tbilisi': 0.78}
Factual Knowledge	capital_world	Canada is to Ottawa as Georgia is to	tbilisi	Atlanta	0.35	0	{'Atlanta': 0.35, '__': 0.06, '______': 0.06, '?': 0.03, '?"': 0.03}	309	5.79357e-05	0.353458	0.996921	key	key|target	0.78	TRUE	TRUE	TRUE	target	{'tbilisi': 0.78}
Factual Knowledge	UK_city_county	hull is to yorkshire as newport is to	gwent	som	0.32	0	{'som': 0.32, 'w': 0.12, 'glam': 0.11, 'mon': 0.06, 'south': 0.04}	165	0.000240326	0.318119	0.998356	key	key|target	0.78	TRUE	TRUE	TRUE	target	{'gwent': 0.78}
Semantic Hierarchies	hypernyms_misc	book is to notebook as band is to	wristband	band	0.29	0	{'band': 0.29, 'orchestra': 0.07, 'what': 0.05, '____': 0.03, '__': 0.03}	595	4.1008e-05	0.289021	0.994071	key	key|target	0.78	TRUE	TRUE	TRUE	target	{'wristband': 0.78}
Semantic Relations	antonyms_binary	downslope is to upslope as inverse is to	reverse	direct	0.29	0	{'direct': 0.29, 'what': 0.07, '': 0.05, '?': 0.04, '______': 0.04}	62	0.00148773	0.291481	0.999382	key	key|target	0.78	TRUE	TRUE	TRUE	target	{'reverse': 0.78}
Morphological Modifiers	adj+ly_reg	differently is to different as obviously is to	obvious	obviously	0.27	0	{'obviously': 0.27, 'clearly': 0.1, '______': 0.04, 'evidently': 0.03, '': 0.03}	43	0.00260925	0.263016	0.999572	key	key|target	0.78	TRUE	TRUE	TRUE	target	{'obvious': 0.78}
Morphological Modifiers	re+verb_reg	deem is to redeem as develop is to	redevelop	develop	0.24	0	{'develop': 0.24, '': 0.07, 'evolve': 0.04, '______': 0.04, '__': 0.03}	125	0.000652313	0.238605	0.998754	key	key|target	0.78	TRUE	TRUE	TRUE	target	{'redevelop': 0.78}
Morphological Modifiers	re+verb_reg	define is to redefine as develop is to	redevelop	develop	0.24	0	{'develop': 0.24, 'evolve': 0.19, 'unfold': 0.08, 'grow': 0.05, 'discover': 0.02}	37	0.00244141	0.23877	0.999631	key	key|target	0.78	TRUE	TRUE	TRUE	target	{'redevelop': 0.78}
Morphological Modifiers	over+adj_reg	exposed is to overexposed as written is to	overwritten	unw	0.22	0	{'unw': 0.22, 'written': 0.12, 'spoken': 0.07, 'read': 0.06, 'un': 0.03}	53	0.00170135	0.220955	0.999472	key	key|target	0.78	TRUE	TRUE	TRUE	target	{'overwritten': 0.78}
Semantic Hierarchies	hypernyms_misc	bracelet is to jewelry as perfume is to	toiletry	fragrance	0.21	0	{'fragrance': 0.21, '______': 0.09, 'perfume': 0.05, 'what': 0.04, '____': 0.04}	11	0.020874	0.190063	0.99989	key	key|target	0.78	TRUE	TRUE	TRUE	target	{'toiletry': 0.78}
Morphological Modifiers	adj_superlative	costly is to costliest as dumb is to	dumbest	smart	0.2	0	{'smart': 0.2, '______': 0.05, 'what': 0.05, '"': 0.05, '': 0.04}	8	0.0220947	0.174194	0.99992	key	key|target	0.78	TRUE	TRUE	TRUE	target	{'dumbest': 0.78}
Morphological Modifiers	over+adj_reg	loaded is to overloaded as stretched is to	overstretched	stretched	0.19	0	{'stretched': 0.19, '______': 0.07, '': 0.03, '?': 0.05}	25	0.00650024	0.183929	0.999751	key	key|target	0.78	TRUE	TRUE	TRUE	target	{'overstretched': 0.78}
Semantic Relations	antonyms_binary	end is to beginning as southwest is to	southeast		0.19	0	{'': 0.06, '?': 0.11, 'north': 0.07, ':': 0.05}	26	0.00527954	0.187103	0.999741	key	key|target	0.78	TRUE	TRUE	TRUE	target	{'southeast': 0.78}
Verbal & Grammatical Forms	present_participle	shuffling is to shuffle as seeing is to	see	seeing	0.19	0	{'seeing': 0.19, 'looking': 0.12, 'blindness': 0.03, '______': 0.02, '__': 0.02}	31	0.00567627	0.1828	0.999691	key	key|target	0.78	TRUE	TRUE	TRUE	target	{'see': 0.78}
Factual Knowledge	capital_world	Mauritania is to Nouakchott as Norway is to	oslo	?	0.18	0	{'?': 0.04, 'what': 0.08, '______': 0.04}	7	0.0322266	0.152344	0.99993	key	key|target	0.78	TRUE	TRUE	TRUE	target	{'oslo': 0.78}
Semantic Hierarchies	hypernyms_misc	armchair is to chair as photo is to	picture		0.18	0	{'': 0.03, '?': 0.06, ':': 0.04}	8	0.0249023	0.159668	0.99992	key	key|target	0.78	TRUE	TRUE	TRUE	target	{'picture': 0.78}
Verbal & Grammatical Forms	verb_Ving_Ved	attended is to attending as related is to	relating	related	0.18	0	{'related': 0.18, '______': 0.12, '____': 0.06, '?': 0.04, '__': 0.03}	45	0.00317383	0.181396	0.999552	key	key|target	0.78	TRUE	TRUE	TRUE	target	{'relating': 0.78}
Semantic Hierarchies	hypernyms_misc	blender is to appliance as tv is to	device	television	0.17	0	{'television': 0.17, '?': 0.07, '': 0.06, 'tv': 0.04}	64	0.0014801	0.164536	0.999362	key	key|target	0.78	TRUE	TRUE	TRUE	target	{'device': 0.78}
Semantic Relations	family	brother is to sister as nephew is to	niece	what	0.17	0	{'what': 0.17, 'whom': 0.15, '?"': 0.05, '"': 0.05, '______': 0.04}	13	0.0150757	0.151917	0.99987	key	key|target	0.78	TRUE	TRUE	TRUE	target	{'niece': 0.78}
Semantic Relations	male_female	brother is to sister as nephew is to	niece	what	0.17	0	{'what': 0.17, 'whom': 0.15, '?"': 0.05, '"': 0.05, '______': 0.04}	13	0.0150757	0.151917	0.99987	key	key|target	0.78	TRUE	TRUE	TRUE	target	{'niece': 0.78}
Semantic Relations	antonyms_gradable	colorful is to colorless as generous is to	stingy		0.16	0	{'': 0.05, '?': 0.07, 'miser': 0.04, ':': 0.04}	7	0.0251465	0.138916	0.99993	key	key|target	0.78	TRUE	TRUE	TRUE	target	{'stingy': 0.78}
Verbal & Grammatical Forms	noun_plural_irreg	histories is to history as strategies is to	strategy	tactics	0.16	0	{'tactics': 0.16, 'war': 0.13, 'politics': 0.09, 'games': 0.06, 'warfare': 0.04}	13	0.0098877	0.145386	0.99987	key	key|target	0.78	TRUE	TRUE	TRUE	target	{'strategy': 0.78}
Morphological Modifiers	noun+less_reg	gender is to genderless as speech is to	speechless	writing	0.15	0	{'writing': 0.15, 'silence': 0.15, 'language': 0.06, 'tele': 0.04, 'thought': 0.04}	7	0.0217285	0.128662	0.99993	key	key|target	0.78	TRUE	TRUE	TRUE	target	{'speechless': 0.78}
Morphological Modifiers	re+verb_reg	reassure is to assure as regenerate is to	generate		0.15	0	{'': 0.08, ':': 0.03, '______': 0.03, '__': 0.03}	11	0.0163574	0.130127	0.99989	key	key|target	0.78	TRUE	TRUE	TRUE	target	{'generate': 0.78}
Semantic Relations	antonyms_binary	out is to in as southeast is to	southwest		0.15	0	{'': 0.04, '?': 0.14, 'a': 0.05}	18	0.0106812	0.13678	0.999821	key	key|target	0.78	TRUE	TRUE	TRUE	target	{'southwest': 0.78}
Semantic Hierarchies	hypernyms_misc	toiletry is to perfume as brush is to	toothbrush	paint	0.14	0	{'paint': 0.14, '': 0.05, '?': 0.04}	24	0.00872803	0.127991	0.999761	key	key|target	0.78	TRUE	TRUE	TRUE	target	{'toothbrush': 0.78}
Semantic Relations	male_female	father is to mother as waiter is to	waitress	what	0.14	0	{'what': 0.14, 'customer': 0.14, 'cook': 0.06, '____': 0.05, '______': 0.05}	8	0.0220947	0.117554	0.99992	key	key|target	0.78	TRUE	TRUE	TRUE	target	{'waitress': 0.78}
Morphological Modifiers	verb+tion_irreg	colonization is to colonize as imagination is to	imagine	reality	0.13	0	{'reality': 0.13, 'fantasy': 0.05, 'imagination': 0.04, 'the': 0.04, 'memory': 0.03}	26	0.00518799	0.120789	0.999741	key	key|target	0.78	TRUE	TRUE	TRUE	target	{'imagine': 0.78}
Morphological Modifiers	over+adj_reg	populated is to overpopulated as qualified is to	overqualified	______	0.13	0	{'______': 0.13, 'un': 0.1, 'A': 0.04, '': 0.04, 'what': 0.04}	14	0.0151978	0.111755	0.99986	key	key|target	0.78	TRUE	TRUE	TRUE	target	{'overqualified': 0.78}
Semantic Hierarchies	hypernyms_misc	chair is to armchair as fuel is to	gasoline	?	0.13	0	{'?': 0.03, '': 0.08, 'what': 0.04}	13	0.0151978	0.111755	0.99987	key	key|target	0.78	TRUE	TRUE	TRUE	target	{'gasoline': 0.78}
Semantic Relations	male_female	lion is to lioness as nephew is to	niece	?	0.13	0	{'?': 0.13, 'what': 0.09, '': 0.06, ':': 0.05, 'aunt': 0.05}	7	0.0361328	0.0898438	0.99993	key	key|target	0.78	TRUE	TRUE	TRUE	target	{'niece': 0.78}
Factual Knowledge	name_occupation	edison is to inventor as michelangelo is to	sculptor	artist	0.12	0	{'artist': 0.12, 'what': 0.06, '?': 0.05, '__': 0.04, '': 0.04}	6	0.0378418	0.0783691	0.99994	key	key|target	0.78	TRUE	TRUE	TRUE	target	{'sculptor': 0.78}
Morphological Modifiers	verb+ment_irreg	endorse is to endorsement as enroll is to	enrollment		0.12	0	{'': 0.08, ':': 0.04, '?': 0.05}	5	0.0380859	0.0791016	0.99995	key	key|target	0.78	TRUE	TRUE	TRUE	target	{'enrollment': 0.78}
Morphological Modifiers	verb+tion_irreg	computation is to compute as declaration is to	declare	definition	0.12	0	{'definition': 0.12, 'assertion': 0.08, 'declaration': 0.05, 'expression': 0.03, 'statement': 0.03}	32	0.00408936	0.119446	0.999681	key	key|target	0.78	TRUE	TRUE	TRUE	target	{'declare': 0.78}
Semantic Hierarchies	hypernyms_misc	appliance is to fridge as cream is to	sunscreen	milk	0.12	0	{'milk': 0.12, '_': 0.06, '______': 0.05, '____': 0.04, 'coffee': 0.04}	1436	1.18017e-05	0.117176	0.98569	key	key|target	0.78	TRUE	TRUE	TRUE	target	{'sunscreen': 0.78}
Semantic Relations	animal_sound	howl is to coyote as grunt is to	gorilla	pig	0.12	0	{'pig': 0.12, 'hog': 0.09, '': 0.07, '?': 0.06}	54	0.00153351	0.116631	0.999462	key	key|target	0.78	TRUE	TRUE	TRUE	target	{'gorilla': 0.78}
Morphological Modifiers	verb+er_irreg	eat is to eater as promote is to	promoter		0.11	0	{'': 0.06, '?': 0.07, ':': 0.05, '"': 0.04}	6	0.0405273	0.0693359	0.99994	key	key|target	0.78	TRUE	TRUE	TRUE	target	{'promoter': 0.78}
Semantic Relations	animal_sound	ferret is to dook as sheep is to	baa	______	0.11	0	{'______': 0.11, '_____': 0.08, '____': 0.06, '': 0.05, '___': 0.05}	48	0.00234985	0.110931	0.999522	key	key|target	0.78	TRUE	TRUE	TRUE	target	{'baa': 0.78}
Semantic Hierarchies	hypernyms_misc	pastry is to food as vase is to	jar		0.1	0	{'': 0.04, 'flower': 0.07, '?': 0.06, 'flowers': 0.04}	356	0.000109196	0.0975471	0.996452	key	key|target	0.78	TRUE	TRUE	TRUE	target	{'jar': 0.78}
Semantic Relations	male_female	lion is to lioness as sir is to	madam	?	0.1	0	{'?': 0.05, 'what': 0.06, '': 0.06, '...': 0.05}	11	0.019043	0.0805664	0.99989	key	key|target	0.78	TRUE	TRUE	TRUE	target	{'madam': 0.78}
Semantic Relations	male_female	duke is to duchess as tiger is to	tigress	?	0.1	0	{'?': 0.1, ':': 0.04, 'what': 0.07, '': 0.04}	144	0.000297546	0.101265	0.998565	key	key|target	0.78	TRUE	TRUE	TRUE	target	{'tigress': 0.78}
Semantic Relations	antonyms_gradable	aware is to unaware as energetic is to	lethargic	?	0.1	0	{'?': 0.1, '': 0.04, '______': 0.05, ':': 0.03}	22	0.0126953	0.0869141	0.999781	key	key|target	0.78	TRUE	TRUE	TRUE	target	{'lethargic': 0.78}
Semantic Hierarchies	hypernyms_misc	postcard is to card as vase is to	jar		0.09	0	{'': 0.05, '____': 0.04, '?': 0.04, ':': 0.04}	80	0.00151825	0.0844193	0.999203	key	key|target	0.78	TRUE	TRUE	TRUE	target	{'jar': 0.78}
Semantic Hierarchies	hypernyms_misc	photo is to picture as shirt is to	clothes	_____	0.09	0	{'_____': 0.09, '______': 0.07, '____': 0.07, 'garment': 0.04, 'shirt': 0.04}	21	0.00976562	0.0830078	0.999791	key	key|target	0.78	TRUE	TRUE	TRUE	target	{'clothes': 0.78}
Semantic Relations	family	stepsister is to stepbrother as stepmother is to	stepfather	what	0.09	0	{'what': 0.09, '__': 0.08, '______': 0.07, ':': 0.05}	5	0.0437012	0.0490723	0.99995	key	key|target	0.78	TRUE	TRUE	TRUE	target	{'stepfather': 0.78}
Morphological Modifiers	over+adj_reg	ambitious is to overambitious as qualified is to	overqualified	______	0.08	0	{'______': 0.08, '': 0.06, 'un': 0.06, '?': 0.05}	5	0.0454102	0.0341797	0.99995	key	key|target	0.78	TRUE	TRUE	TRUE	target	{'overqualified': 0.78}
Morphological Modifiers	over+adj_reg	played is to overplayed as sized is to	oversized	?	0.08	0	{'?': 0.08, '______': 0.07, ':': 0.04, '': 0.03}	9	0.0213623	0.0631104	0.99991	key	key|target	0.78	TRUE	TRUE	TRUE	target	{'oversized': 0.78}
Morphological Modifiers	verb+er_irreg	eater is to eat as provider is to	provide	______	0.08	0	{'______': 0.08, '__': 0.06, '?': 0.04, 'provider': 0.03, '____': 0.03}	17	0.00952148	0.0754395	0.999831	key	key|target	0.78	TRUE	TRUE	TRUE	target	{'provide': 0.78}
Semantic Hierarchies	hypernyms_misc	computer is to device as sunscreen is to	cream	lotion	0.08	0	{'lotion': 0.08, 'beach': 0.08, 'skin': 0.08, 'sun': 0.07, 'sunscreen': 0.05}	45	0.00268555	0.0812988	0.999552	key	key|target	0.78	TRUE	TRUE	TRUE	target	{'cream': 0.78}
Semantic Hierarchies	hypernyms_misc	deodorant is to toiletry as photo is to	picture	photography	0.08	0	{'photography': 0.08, 'camera': 0.06, '______': 0.04, '__': 0.04, '"': 0.04}	9	0.0209961	0.0571289	0.99991	key	key|target	0.78	TRUE	TRUE	TRUE	target	{'picture': 0.78}
Semantic Relations	male_female	poet is to poetess as valet is to	maid	______	0.08	0	{'______': 0.08, 'va': 0.07, '__': 0.06, '': 0.05, 'what': 0.04}	44	0.00352478	0.0741119	0.999562	key	key|target	0.78	TRUE	TRUE	TRUE	target	{'maid': 0.78}
Semantic Relations	male_female	cow is to bull as headmistress is to	headmaster	school	0.08	0	{'school': 0.08, 'what': 0.06, '': 0.05, '_': 0.04}	10	0.0220947	0.0550537	0.9999	key	key|target	0.78	TRUE	TRUE	TRUE	target	{'headmaster': 0.78}
Factual Knowledge	capital_world	Kenya is to Nairobi as Liechtenstein is to	vaduz	__	0.07	0	{'__': 0.07, '______': 0.06, '?': 0.06, ':': 0.04}	15	0.0161133	0.0517578	0.999851	key	key|target	0.78	TRUE	TRUE	TRUE	target	{'vaduz': 0.78}
Morphological Modifiers	verb+ment_irreg	improvement is to improve as investment is to	invest	profit	0.07	0	{'profit': 0.07, 'savings': 0.06, 'capital': 0.05, 'return': 0.05, 'saving': 0.05}	235	0.000347137	0.0655708	0.997658	key	key|target	0.78	TRUE	TRUE	TRUE	target	{'invest': 0.78}
Morphological Modifiers	superlative	long is to longest as strong is to	strongest		0.07	0	{'': 0.07, '?': 0.07, ':': 0.06, 'weakest': 0.05, 'a': 0.05}	7	0.0373535	0.0373535	0.99993	key	key|target	0.78	TRUE	TRUE	TRUE	target	{'strongest': 0.78}
Semantic Hierarchies	hypernyms_misc	journal is to diary as sandwich is to	hamburger	______	0.07	0	{'______': 0.07, '____': 0.06, '__': 0.05, '_____': 0.04, 'bread': 0.04}	7	0.0205078	0.0512695	0.99993	key	key|target	0.78	TRUE	TRUE	TRUE	target	{'hamburger': 0.78}
Semantic Hierarchies	hypernyms_misc	jeans is to trousers as tub is to	container	?	0.07	0	{'?': 0.07, 'what': 0.05, 'shower': 0.04, 'bath': 0.04, '': 0.04}	168	0.000366211	0.0709229	0.998326	key	key|target	0.78	TRUE	TRUE	TRUE	target	{'container': 0.78}
Semantic Hierarchies	hypernyms_misc	notebook is to book as shirt is to	clothes	____	0.07	0	{'____': 0.07, '______': 0.05, '': 0.05, '_____': 0.05, ':': 0.04}	17	0.0133057	0.0584717	0.999831	key	key|target	0.78	TRUE	TRUE	TRUE	target	{'clothes': 0.78}
Semantic Relations	animal_shelter	crocodile is to river as woodchuck is to	hole	bur	0.07	0	{'bur': 0.07, '': 0.05, '?': 0.05, 'forest': 0.04}	30	0.00735474	0.058075	0.999701	key	key|target	0.78	TRUE	TRUE	TRUE	target	{'hole': 0.78}
Semantic Relations	animal_shelter	cricket is to nest as trout is to	river	stream	0.07	0	{'stream': 0.07, '_____': 0.07, '______': 0.05, 'what': 0.04, '__': 0.03}	8	0.0240479	0.0501709	0.99992	key	key|target	0.78	TRUE	TRUE	TRUE	target	{'river': 0.78}
Semantic Relations	animal_sound	elephant is to trumpet as sheep is to	baa	_____	0.07	0	{'_____': 0.07, '______': 0.06, '': 0.06, 'ble': 0.06, ':': 0.05}	170	0.000385284	0.0728569	0.998306	key	key|target	0.78	TRUE	TRUE	TRUE	target	{'baa': 0.78}
Semantic Relations	animal_sound	cricket is to chirp as elk is to	bellow	______	0.06	0	{'______': 0.06, '': 0.05, '_____': 0.04, '"': 0.04, 'what': 0.03}	182	0.000444412	0.0559521	0.998186	key	key|target	0.78	TRUE	TRUE	TRUE	target	{'bellow': 0.78}
Semantic Relations	animal_shelter	mouse is to nest as trout is to	river	swim	0.06	0	{'swim': 0.06, '__': 0.06, '_____': 0.05, '______': 0.05, 'stream': 0.05}	14	0.0135498	0.0513916	0.99986	key	key|target	0.78	TRUE	TRUE	TRUE	target	{'river': 0.78}
Semantic Relations	animal_sound	elephant is to trumpet as fox is to	howl	_____	0.06	0	{'_____': 0.06, '': 0.06, 'bark': 0.04, ':': 0.04, 'a': 0.03}	22	0.0115356	0.0529175	0.999781	key	key|target	0.78	TRUE	TRUE	TRUE	target	{'howl': 0.78}
Semantic Relations	antonyms_gradable	big is to small as clear is to	vague	muddy	0.06	0	{'muddy': 0.06, 'murky': 0.06, 'what': 0.05, 'cloudy': 0.03, '______': 0.03}	79	0.00205994	0.0601959	0.999213	key	key|target	0.78	TRUE	TRUE	TRUE	target	{'vague': 0.78}
Verbal & Grammatical Forms	noun_plural_irreg	century is to centuries as property is to	properties	possessions	0.06	0	{'possessions': 0.06, 'property': 0.05, 'money': 0.03, 'the': 0.03, 'theft': 0.03}	7	0.0155029	0.0460205	0.99993	key	key|target	0.78	TRUE	TRUE	TRUE	target	{'properties': 0.78}
Semantic Relations	male_female	headmaster is to headmistress as murderer is to	murderess	______	0.05	0	{'______': 0.05, ':': 0.04, '"': 0.04, '__': 0.04, 'what': 0.03}	11	0.0228271	0.0255127	0.99989	key	key|target	0.78	TRUE	TRUE	TRUE	target	{'murderess': 0.78}
Verbal & Grammatical Forms	noun_plural_irreg	histories is to history as species is to	species	genus	0.2	0	{'genus': 0.2, 'life': 0.09, 'evolution': 0.06, 'the': 0.05, 'nature': 0.04}	14	0.0167236	0.179565	0.99986	original	target	0.77	TRUE	TRUE	TRUE	target	{'species': 0.77}
Morphological Modifiers	re+verb_reg	appear is to reappear as introduce is to	reintroduce	introduce	0.72	0	{'introduce': 0.72, 'introduced': 0.04, 'introduction': 0.03, 'present': 0.01, 'be': 0.01}	10	0.00296021	0.719696	0.9999	key	key|target	0.77	TRUE	TRUE	TRUE	target	{'reintroduce': 0.77}
Morphological Modifiers	re+verb_reg	connect is to reconnect as occur is to	reoccur	occur	0.63	0	{'occur': 0.63, 'recur': 0.07, 'occurred': 0.02, 'happen': 0.01, 'occurrence': 0.01}	9	0.00653076	0.622375	0.99991	key	key|target	0.77	TRUE	TRUE	TRUE	target	{'reoccur': 0.77}
Semantic Relations	male_female	mother is to father as bitch is to	hound	dog	0.6	0	{'dog': 0.6, 'what': 0.07, 'mother': 0.03, 'man': 0.02, 'son': 0.01}	1077	6.73532e-06	0.59765	0.989268	key	key|target	0.77	TRUE	TRUE	TRUE	target	{'hound': 0.77}
Semantic Relations	animal_sound	frog is to ribbit as leopard is to	growl	roar	0.55	0	{'roar': 0.55, '______': 0.03, '__': 0.02, '_____': 0.02, '____': 0.02}	5	0.0159912	0.530884	0.99995	key	key|target	0.77	TRUE	TRUE	TRUE	target	{'growl': 0.77}
Morphological Modifiers	re+verb_reg	deem is to redeem as introduce is to	reintroduce	introduce	0.36	0	{'introduce': 0.36, 'present': 0.05, '': 0.05, '______': 0.03, '__': 0.03}	106	0.000732422	0.356689	0.998944	key	key|target	0.77	TRUE	TRUE	TRUE	target	{'reintroduce': 0.77}
Verbal & Grammatical Forms	noun_plural_irreg	agencies is to agency as wives is to	wife	husbands	0.33	0	{'husbands': 0.33, '______': 0.07, 'husband': 0.06, 'wives': 0.04, '__': 0.03}	17	0.00640869	0.321716	0.999831	key	key|target	0.77	TRUE	TRUE	TRUE	target	{'wife': 0.77}
Semantic Relations	male_female	businesswoman is to businessman as bitch is to	hound	dog	0.28	0	{'dog': 0.28, 'bastard': 0.19, 'what': 0.05, 'son': 0.05, 'asshole': 0.04}	6719	4.11645e-07	0.277343	0.933046	key	key|target	0.77	TRUE	TRUE	TRUE	target	{'hound': 0.77}
Factual Knowledge	UK_city_county	birmingham is to midlands as glasgow is to	lowlands	sc	0.25	0	{'sc': 0.25, '______': 0.08, '__': 0.07, 'west': 0.04, '_____': 0.03}	5	0.0217285	0.227295	0.99995	key	key|target	0.77	TRUE	TRUE	TRUE	target	{'lowlands': 0.77}
Morphological Modifiers	re+verb_reg	deem is to redeem as emerge is to	reemerge	emerge	0.23	0	{'emerge': 0.23, '__': 0.07, '______': 0.05, 'em': 0.04, '': 0.04}	80	0.000976562	0.230469	0.999203	key	key|target	0.77	TRUE	TRUE	TRUE	target	{'reemerge': 0.77}
Semantic Relations	animal_shelter	crocodile is to river as seal is to	den	ocean	0.23	0	{'ocean': 0.23, '': 0.06, 'sea': 0.04, '?': 0.03}	1121	7.689e-06	0.233391	0.988829	key	key|target	0.77	TRUE	TRUE	TRUE	target	{'den': 0.77}
Semantic Relations	animal_shelter	crow is to nest as herring is to	sea	school	0.2	0	{'school': 0.2, 'sho': 0.1, 'swim': 0.05, '______': 0.04, '': 0.03}	23	0.00576782	0.197357	0.999771	key	key|target	0.77	TRUE	TRUE	TRUE	target	{'sea': 0.77}
Morphological Modifiers	verb+able_reg	afford is to affordable as publish is to	publishable	______	0.18	0	{'______': 0.18, '__': 0.08, '_____': 0.03, '____': 0.03, '': 0.03}	8	0.0192871	0.16333	0.99992	key	key|target	0.77	TRUE	TRUE	TRUE	target	{'publishable': 0.77}
Morphological Modifiers	over+adj_reg	exposed is to overexposed as stretched is to	overstretched	squ	0.18	0	{'squ': 0.18, 'compressed': 0.17, '______': 0.06, 'what': 0.05, 'squeezed': 0.04}	85	0.000904083	0.18269	0.999153	key	key|target	0.77	TRUE	TRUE	TRUE	target	{'overstretched': 0.77}
Verbal & Grammatical Forms	verb_Ving_3pSg	hears is to hearing as relates is to	relating		0.18	0	{'': 0.07, '______': 0.08, '?': 0.07, 'a': 0.03}	36	0.00439453	0.171387	0.999641	key	key|target	0.77	TRUE	TRUE	TRUE	target	{'relating': 0.77}
Morphological Modifiers	adj+ly_reg	culturally is to cultural as previously is to	previous	previously	0.17	0	{'previously': 0.17, '______': 0.06, 'prior': 0.04, '_____': 0.02, 'history': 0.02}	11	0.0149536	0.155945	0.99989	key	key|target	0.77	TRUE	TRUE	TRUE	target	{'previous': 0.77}
Morphological Modifiers	verb+er_irreg	intrude is to intruder as promote is to	promoter		0.17	0	{'': 0.11, '?': 0.06, '______': 0.05, 'a': 0.04}	7	0.0236816	0.151123	0.99993	key	key|target	0.77	TRUE	TRUE	TRUE	target	{'promoter': 0.77}
Semantic Hierarchies	hypernyms_misc	desk is to furniture as dress is to	clothes	?	0.17	0	{'?': 0.04, 'clothing': 0.11, '': 0.07, ':': 0.04}	5	0.0371094	0.129883	0.99995	key	key|target	0.77	TRUE	TRUE	TRUE	target	{'clothes': 0.77}
Semantic Hierarchies	hypernyms_misc	bracelet is to jewelry as hairnet is to	net	?	0.17	0	{'?': 0.17, '': 0.04, ':': 0.04, '"': 0.03}	2375	2.39909e-06	0.165037	0.976333	key	key|target	0.77	TRUE	TRUE	TRUE	target	{'net': 0.77}
Verbal & Grammatical Forms	adjective_to_adverb	efficiently is to efficient as typically is to	typical	typically	0.17	0	{'typically': 0.17, '______': 0.09, 'usually': 0.05, '__': 0.04, 'normally': 0.03}	6	0.0227051	0.145264	0.99994	key	key|target	0.77	TRUE	TRUE	TRUE	target	{'typical': 0.77}
Verbal & Grammatical Forms	noun_plural_irreg	category is to categories as history is to	histories	the	0.17	0	{'the': 0.17, 'life': 0.05, 'time': 0.04, 'events': 0.04, 'science': 0.03}	45	0.00320435	0.166718	0.999552	key	key|target	0.77	TRUE	TRUE	TRUE	target	{'histories': 0.77}
Verbal & Grammatical Forms	noun_plural_reg	resource is to resources as science is to	sciences	nature	0.16	0	{'nature': 0.16, 'knowledge': 0.15, 'the': 0.1, 'reality': 0.03, 'technology': 0.03}	13	0.0110474	0.151062	0.99987	key	key|target	0.77	TRUE	TRUE	TRUE	target	{'sciences': 0.77}
Morphological Modifiers	re+verb_reg	consider is to reconsider as integrate is to	reintegrate	integrate	0.15	0	{'integrate': 0.15, 'dis': 0.1, 'differentiate': 0.07, 'separate': 0.02, 'segreg': 0.02}	10	0.00958252	0.139832	0.9999	key	key|target	0.77	TRUE	TRUE	TRUE	target	{'reintegrate': 0.77}
Verbal & Grammatical Forms	noun_plural_reg	populations is to population as roads is to	road	city	0.15	0	{'city': 0.15, '______': 0.06, '__': 0.06, 'country': 0.05, 'transportation': 0.05}	12	0.0175781	0.129883	0.99988	key	key|target	0.77	TRUE	TRUE	TRUE	target	{'road': 0.77}
Verbal & Grammatical Forms	present_participle	generate is to generating as see is to	seeing	saw	0.15	0	{'saw': 0.15, 'seen': 0.1, 'blind': 0.09, 'sight': 0.06, 'look': 0.06}	5	0.0356445	0.11377	0.99995	key	key|target	0.77	TRUE	TRUE	TRUE	target	{'seeing': 0.77}
Semantic Hierarchies	hypernyms_misc	plum is to fruit as sunscreen is to	cream	skin	0.14	0	{'skin': 0.14, 'sun': 0.07, '______': 0.06, '_____': 0.04, 'beach': 0.04}	150	0.000514984	0.142063	0.998505	key	key|target	0.77	TRUE	TRUE	TRUE	target	{'cream': 0.77}
Semantic Relations	animal_shelter	hedgehog is to nest as seal is to	den	_____	0.14	0	{'_____': 0.14, '______': 0.08, '': 0.08, '____': 0.05, '__': 0.05}	113	0.000724792	0.137947	0.998874	key	key|target	0.77	TRUE	TRUE	TRUE	target	{'den': 0.77}
Semantic Relations	antonyms_gradable	tanned is to pale as tasteless is to	tasty		0.14	0	{'': 0.06, '?': 0.03, '______': 0.04}	12	0.0144653	0.12323	0.99988	key	key|target	0.77	TRUE	TRUE	TRUE	target	{'tasty': 0.77}
Semantic Relations	antonyms_gradable	small is to large as flat is to	lumpy	round	0.14	0	{'round': 0.14, 'curved': 0.11, 'high': 0.05, 'tall': 0.04, 'sharp': 0.04}	856	3.76701e-05	0.135705	0.99147	key	key|target	0.77	TRUE	TRUE	TRUE	target	{'lumpy': 0.77}
Semantic Relations	male_female	mom is to dad as madam is to	sir	_	0.14	0	{'_': 0.14, 'what': 0.09, 'man': 0.04, '____': 0.04, 'm': 0.03}	20	0.0108643	0.125854	0.999801	key	key|target	0.77	TRUE	TRUE	TRUE	target	{'sir': 0.77}
Factual Knowledge	UK_city_county	crawley is to sussex as newport is to	gwent	w	0.13	0	{'w': 0.13, 'what': 0.06, 'which': 0.05, 'som': 0.05, '?': 0.04}	425	6.53267e-05	0.129817	0.995765	key	key|target	0.77	TRUE	TRUE	TRUE	target	{'gwent': 0.77}
Factual Knowledge	country_capital	Indonesia is to Jakarta as Georgia is to	tbilisi	?	0.13	0	{'?': 0.13, 'Atlanta': 0.12, ':': 0.06, '__': 0.04}	321	5.38826e-05	0.125923	0.996801	key	key|target	0.77	TRUE	TRUE	TRUE	target	{'tbilisi': 0.77}
Morphological Modifiers	over+adj_reg	played is to overplayed as written is to	overwritten	______	0.11	0	{'______': 0.11, '_____': 0.06, '__': 0.05, 'unw': 0.04, '____': 0.04}	36	0.00402832	0.106812	0.999641	key	key|target	0.77	TRUE	TRUE	TRUE	target	{'overwritten': 0.77}
Morphological Modifiers	comparative	heavy is to heavier as weak is to	weaker	stronger	0.11	0	{'stronger': 0.11, '______': 0.11, '"': 0.08, '_____': 0.05, '': 0.03}	8	0.0246582	0.0861816	0.99992	key	key|target	0.77	TRUE	TRUE	TRUE	target	{'weaker': 0.77}
Semantic Relations	male_female	lion is to lioness as mister is to	miss	?	0.11	0	{'?': 0.05, '': 0.06, 'what': 0.05}	9	0.0257568	0.0831299	0.99991	key	key|target	0.77	TRUE	TRUE	TRUE	target	{'miss': 0.77}
Factual Knowledge	UK_city_county	birmingham is to midlands as lincoln is to	lincolnshire	ne	0.1	0	{'ne': 0.1, '?': 0.04, "''": 0.04, '__': 0.03, '': 0.03}	6	0.0256348	0.0695801	0.99994	key	key|target	0.77	TRUE	TRUE	TRUE	target	{'lincolnshire': 0.77}
Factual Knowledge	capital_world	Suriname is to Paramaribo as Georgia is to	tbilisi	:	0.1	0	{':': 0.1, 'Atlanta': 0.1, '?': 0.08, '?"': 0.06, '______': 0.06}	352	5.50747e-05	0.0961363	0.996492	key	key|target	0.77	TRUE	TRUE	TRUE	target	{'tbilisi': 0.77}
Morphological Modifiers	over+adj_reg	ambitious is to overambitious as zealous is to	overzealous		0.1	0	{'': 0.08, '______': 0.06, '?': 0.05, ':': 0.04}	19	0.00952148	0.0866699	0.999811	key	key|target	0.77	TRUE	TRUE	TRUE	target	{'overzealous': 0.77}
Morphological Modifiers	over+adj_reg	overprotective is to protective as overspent is to	spent	:	0.1	0	{':': 0.04, '?': 0.04, '______': 0.04}	6	0.0314941	0.0651855	0.99994	key	key|target	0.77	TRUE	TRUE	TRUE	target	{'spent': 0.77}
Semantic Hierarchies	hypernyms_misc	diary is to journal as plum is to	fruit	prune	0.1	0	{'prune': 0.1, '__': 0.08, '______': 0.07, '____': 0.04, 'peach': 0.03}	5	0.0256348	0.0695801	0.99995	key	key|target	0.77	TRUE	TRUE	TRUE	target	{'fruit': 0.77}
Semantic Hierarchies	hypernyms_misc	shelf is to furniture as sunscreen is to	cream	skin	0.1	0	{'skin': 0.1, 'what': 0.08, '?': 0.07, 'beach': 0.05, '____': 0.04}	724	1.81198e-05	0.101056	0.992785	key	key|target	0.77	TRUE	TRUE	TRUE	target	{'cream': 0.77}
Semantic Relations	antonyms_gradable	abundant is to scarce as organized is to	unorganized		0.1	0	{'': 0.05, 'dis': 0.08, '______': 0.07, 'chaotic': 0.05}	11	0.0202637	0.076416	0.99989	key	key|target	0.77	TRUE	TRUE	TRUE	target	{'unorganized': 0.77}
Morphological Modifiers	verb+tion_irreg	computation is to compute as optimization is to	optimize	search	0.09	0	{'search': 0.09, 'planning': 0.08, 'optimization': 0.07, 'calculus': 0.06, 'decision': 0.06}	19	0.00756836	0.0847168	0.999811	key	key|target	0.77	TRUE	TRUE	TRUE	target	{'optimize': 0.77}
Semantic Hierarchies	hypernyms_misc	furniture is to desk as pin is to	hairpin	a	0.09	0	{'a': 0.09, '______': 0.05, '': 0.05, '_____': 0.05, '____': 0.05}	439	8.34465e-05	0.0941548	0.995625	key	key|target	0.77	TRUE	TRUE	TRUE	target	{'hairpin': 0.77}
Verbal & Grammatical Forms	noun_plural_irreg	families is to family as women is to	woman	______	0.09	0	{'______': 0.09, 'men': 0.08, 'people': 0.07, '__': 0.05, 'man': 0.05}	44	0.00393677	0.0883484	0.999562	key	key|target	0.77	TRUE	TRUE	TRUE	target	{'woman': 0.77}
Morphological Modifiers	verb+ment_irreg	disappoint is to disappointment as enroll is to	enrollment		0.08	0	{'': 0.05, '?': 0.05, '______': 0.04, ':': 0.04}	13	0.020752	0.0563965	0.99987	key	key|target	0.77	TRUE	TRUE	TRUE	target	{'enrollment': 0.77}
Morphological Modifiers	over+adj_reg	overarching is to arching as overlaid is to	laid		0.08	0	{'': 0.06, 'what': 0.06, '______': 0.05, '____': 0.05}	5	0.0458984	0.0297852	0.99995	key	key|target	0.77	TRUE	TRUE	TRUE	target	{'laid': 0.77}
Semantic Hierarchies	hypernyms_misc	furniture is to sofa as jar is to	vase		0.08	0	{'': 0.04, '?': 0.07, '____': 0.04, '______': 0.04}	172	0.000364304	0.0821552	0.998286	key	key|target	0.77	TRUE	TRUE	TRUE	target	{'vase': 0.77}
Semantic Relations	family	father is to mother as grandpa is to	grandma	what	0.08	0	{'what': 0.08, '?': 0.06, '______': 0.06, 'father': 0.06, '____': 0.06}	9	0.0299072	0.0467529	0.99991	key	key|target	0.77	TRUE	TRUE	TRUE	target	{'grandma': 0.77}
Semantic Relations	animal_sound	fly is to buzz as whale is to	sing		0.08	0	{'': 0.06, '?': 0.07, '______': 0.06, '_____': 0.05}	20	0.0098877	0.067749	0.999801	key	key|target	0.77	TRUE	TRUE	TRUE	target	{'sing': 0.77}
Semantic Relations	animal_sound	elephant is to trumpet as moose is to	bellow		0.08	0	{'': 0.05, '?': 0.06, 'what': 0.05, '"': 0.04}	240	0.000199318	0.0779257	0.997608	key	key|target	0.77	TRUE	TRUE	TRUE	target	{'bellow': 0.77, 'elk': 0.11}
Semantic Relations	male_female	father is to mother as grandpa is to	grandma	what	0.08	0	{'what': 0.08, '?': 0.06, '______': 0.06, 'father': 0.06, '____': 0.06}	9	0.0299072	0.0467529	0.99991	key	key|target	0.77	TRUE	TRUE	TRUE	target	{'grandma': 0.77}
Morphological Modifiers	verb+ment_irreg	detachment is to detach as excitement is to	excite	calm	0.07	0	{'calm': 0.07, 'excitement': 0.06, 'detachment': 0.04, 'be': 0.04, 'passion': 0.03}	9	0.0166016	0.0532227	0.99991	key	key|target	0.77	TRUE	TRUE	TRUE	target	{'excite': 0.77}
Morphological Modifiers	noun+less_reg	legless is to leg as talentless is to	talent	?	0.07	0	{'?': 0.07, '': 0.03, '______': 0.05, 'what': 0.04}	8	0.0233154	0.0440674	0.99992	key	key|target	0.77	TRUE	TRUE	TRUE	target	{'talent': 0.77}
Morphological Modifiers	over+adj_reg	overloaded is to loaded as oversized is to	sized	:	0.07	0	{':': 0.04, '______': 0.05, '____': 0.04, '': 0.04}	20	0.0117188	0.0556641	0.999801	key	key|target	0.77	TRUE	TRUE	TRUE	target	{'sized': 0.77}
Morphological Modifiers	over+adj_reg	stated is to overstated as stretched is to	overstretched	______	0.07	0	{'______': 0.07, '': 0.07, '?': 0.05, ':': 0.05, 'stretched': 0.04}	41	0.00369263	0.0705261	0.999591	key	key|target	0.77	TRUE	TRUE	TRUE	target	{'overstretched': 0.77}
Morphological Modifiers	comparative	short is to shorter as quick is to	quicker	?	0.07	0	{'?': 0.07, '': 0.06, '"': 0.06, 'what': 0.04, 'a': 0.04}	10	0.0279541	0.043335	0.9999	key	key|target	0.77	TRUE	TRUE	TRUE	target	{'quicker': 0.77}
Morphological Modifiers	verb+er_irreg	baker is to bake as defender is to	defend	______	0.07	0	{'______': 0.07, '?': 0.05, '_____': 0.04, '': 0.04, 'defender': 0.03}	5	0.0285645	0.0441895	0.99995	key	key|target	0.77	TRUE	TRUE	TRUE	target	{'defend': 0.77}
Semantic Hierarchies	hypernyms_misc	fruit is to peach as picture is to	photo	?	0.07	0	{'?': 0.07, '______': 0.07, 'painting': 0.06, 'a': 0.04, '': 0.04}	61	0.0025177	0.0687714	0.999392	key	key|target	0.77	TRUE	TRUE	TRUE	target	{'photo': 0.77}
Semantic Hierarchies	hypernyms_misc	grapefruit is to citrus as tub is to	container	______	0.06	0	{'______': 0.06, '_____': 0.05, '...': 0.04, 'what': 0.03, '?': 0.03}	331	0.000121117	0.0606699	0.996702	key	key|target	0.77	TRUE	TRUE	TRUE	target	{'container': 0.77}
Semantic Relations	male_female	sculptress is to sculptor as superwoman is to	superman	what	0.06	0	{'what': 0.06, ':': 0.05, '______': 0.05, '__': 0.05}	10	0.0239258	0.0410156	0.9999	key	key|target	0.77	TRUE	TRUE	TRUE	target	{'superman': 0.77}
Semantic Relations	male_female	duchess is to duke as headmistress is to	headmaster	_	0.06	0	{'_': 0.06, '?': 0.05, '': 0.05, '"': 0.05}	5	0.0332031	0.0249023	0.99995	key	key|target	0.77	TRUE	TRUE	TRUE	target	{'headmaster': 0.77}
Morphological Modifiers	verb+ment_irreg	amendment is to amend as excitement is to	excite	passion	0.05	0	{'passion': 0.05, 'excitement': 0.05, 'be': 0.04, 'agitation': 0.03, 'calm': 0.03}	5	0.0239258	0.0300293	0.99995	key	key|target	0.77	TRUE	TRUE	TRUE	target	{'excite': 0.77}
Semantic Hierarchies	hypernyms_misc	hairpin is to pin as tv is to	device	tv	0.05	0	{'tv': 0.05, 'screen': 0.04, '?': 0.04, '': 0.03}	525	0.000115871	0.0545716	0.994768	key	key|target	0.77	TRUE	TRUE	TRUE	target	{'device': 0.77}
Semantic Hierarchies	hypernyms_misc	gasoline is to fuel as hairnet is to	net	food	0.05	0	{'food': 0.05, '"': 0.04, 'restaurant': 0.04, '”': 0.04, '': 0.04}	8573	6.14673e-07	0.0510248	0.914571	key	key|target	0.77	TRUE	TRUE	TRUE	target	{'net': 0.77}
Semantic Relations	antonyms_gradable	long is to short as tasty is to	tasteless	?	0.04	0	{'?': 0.04, '"': 0.04, '______': 0.04, 'delicious': 0.03, '': 0.03}	100	0.00128937	0.0414352	0.999004	key	key|target	0.77	TRUE	TRUE	TRUE	target	{'tasteless': 0.77}
Verbal & Grammatical Forms	noun_plural_irreg	series is to series as women is to	woman	men	0.46	0	{'men': 0.46, '______': 0.04, 'women': 0.04, 'what': 0.03, 'man': 0.03}	74	0.000923157	0.461967	0.999263	example_value	example_value|target	0.77	TRUE	TRUE	TRUE	target	{'woman': 0.77}
Verbal & Grammatical Forms	noun_plural_irreg	series is to series as society is to	societies	society	0.16	0	{'society': 0.16, '______': 0.08, 'community': 0.07, 'culture': 0.05, 'individual': 0.04}	14	0.012207	0.145996	0.99986	example_value	example_value|target	0.77	TRUE	TRUE	TRUE	target	{'societies': 0.77}
Semantic Relations	antonyms_binary	mortal is to immortal as outward is to	upward	inward	0.89	0	{'inward': 0.89, 'inner': 0.04, 'outward': 0.01, 'in': 0.01, '': 0.01}	24	0.000507355	0.886211	0.999761	key	key|target	0.76	TRUE	TRUE	TRUE	target	{'upward': 0.76}
Morphological Modifiers	re+verb_reg	evaluate is to reevaluate as send is to	resend	send	0.75	0	{'send': 0.75, 'sent': 0.03, 'receive': 0.01, 'deliver': 0.01, 'sends': 0.01}	10	0.00457764	0.741516	0.9999	key	key|target	0.76	TRUE	TRUE	TRUE	target	{'resend': 0.76}
Morphological Modifiers	re+verb_reg	install is to reinstall as locate is to	relocate	find	0.71	0	{'find': 0.71, 'locate': 0.12, 'search': 0.02, 'ls': 0.01, 'where': 0.01}	182	6.62804e-05	0.710871	0.998186	key	key|target	0.76	TRUE	TRUE	TRUE	target	{'relocate': 0.76}
Morphological Modifiers	adj+ness_reg	cheap is to cheapness as directed is to	directedness	direction	0.57	0	{'direction': 0.57, 'director': 0.04, 'directions': 0.02, '______': 0.02, '__': 0.01}	6	0.0110474	0.555359	0.99994	key	key|target	0.76	TRUE	TRUE	TRUE	target	{'directedness': 0.76}
Morphological Modifiers	re+verb_reg	cognize is to recognize as invest is to	reinvest	invest	0.56	0	{'invest': 0.56, 'put': 0.03, 'vest': 0.02, 'make': 0.02, 'give': 0.02}	92	0.00069809	0.557896	0.999083	key	key|target	0.76	TRUE	TRUE	TRUE	target	{'reinvest': 0.76}
Factual Knowledge	UK_city_county	coventry is to midlands as newport is to	gwent	south	0.48	0	{'south': 0.48, 'w': 0.15, '?': 0.02, 'what': 0.01, "''": 0.01}	362	5.36442e-05	0.484321	0.996393	key	key|target	0.76	TRUE	TRUE	TRUE	target	{'gwent': 0.76}
Verbal & Grammatical Forms	present_participle	debugging is to debug as thinking is to	think	thinking	0.48	0	{'thinking': 0.48, 'thought': 0.05, 'writing': 0.04, 'understanding': 0.03, 'learning': 0.03}	52	0.0014267	0.477089	0.999482	key	key|target	0.76	TRUE	TRUE	TRUE	target	{'think': 0.76}
Morphological Modifiers	re+verb_reg	connect is to reconnect as develop is to	redevelop	develop	0.38	0	{'develop': 0.38, 'evolve': 0.05, 'developing': 0.05, 'development': 0.04, 'developer': 0.02}	17	0.00497437	0.377838	0.999831	key	key|target	0.76	TRUE	TRUE	TRUE	target	{'redevelop': 0.76, 'developer': 0.1}
Morphological Modifiers	over+adj_reg	loaded is to overloaded as strained is to	overstrained	strained	0.35	0	{'strained': 0.35, '': 0.04, '______': 0.05, '?': 0.03}	30	0.00364685	0.345963	0.999701	key	key|target	0.76	TRUE	TRUE	TRUE	target	{'overstrained': 0.76}
Verbal & Grammatical Forms	verb_Ving_Ved	added is to adding as provided is to	providing	provided	0.35	0	{'provided': 0.35, '': 0.05, 'given': 0.03, 'supplied': 0.03, '"': 0.02}	10	0.0144653	0.337097	0.9999	key	key|target	0.76	TRUE	TRUE	TRUE	target	{'providing': 0.76}
Morphological Modifiers	re+verb_reg	decorate is to redecorate as engage is to	reengage	engage	0.3	0	{'engage': 0.3, 'engagement': 0.04, '': 0.03, 'marriage': 0.02, 'eng': 0.02}	84	0.000984192	0.297844	0.999163	key	key|target	0.76	TRUE	TRUE	TRUE	target	{'reengage': 0.76}
Morphological Modifiers	re+verb_reg	calculate is to recalculate as examine is to	reexamine	examine	0.29	0	{'examine': 0.29, 'scrutin': 0.05, 'look': 0.04, 'inspect': 0.03, 'explore': 0.03}	10	0.0150757	0.270081	0.9999	key	key|target	0.76	TRUE	TRUE	TRUE	target	{'reexamine': 0.76}
Semantic Hierarchies	hypernyms_misc	brooch is to jewelry as cup is to	tableware	?	0.29	0	{'?': 0.05, '': 0.04, ':': 0.06}	63	0.001091	0.291878	0.999372	key	key|target	0.76	TRUE	TRUE	TRUE	target	{'tableware': 0.76}
Factual Knowledge	UK_city_county	preston is to lancashire as wolverhampton is to	midlands	staff	0.28	0	{'staff': 0.28, 'the': 0.17, 'what': 0.06, '______': 0.04, 'which': 0.03}	2408	3.56138e-06	0.275387	0.976004	key	key|target	0.76	TRUE	TRUE	TRUE	target	{'midlands': 0.76}
Semantic Relations	animal_shelter	bat is to cave as lion is to	den	jungle	0.27	0	{'jungle': 0.27, 'zoo': 0.06, '_____': 0.03, '______': 0.03, '': 0.03}	21	0.00958252	0.261902	0.999791	key	key|target	0.76	TRUE	TRUE	TRUE	target	{'den': 0.76}
Verbal & Grammatical Forms	verb_3pSg_Ved	included is to includes as lost is to	loses	found	0.27	0	{'found': 0.27, 'find': 0.21, 'lost': 0.06, 'gain': 0.03, 'regain': 0.02}	49	0.00131226	0.264313	0.999512	key	key|target	0.76	TRUE	TRUE	TRUE	target	{'loses': 0.76, 'lose': 0.17}
Morphological Modifiers	adj+ness_reg	broken is to brokenness as creative is to	creativeness	creativity	0.24	0	{'creativity': 0.24, 'creation': 0.18, '__': 0.04, '______': 0.04, 'un': 0.02}	5	0.022583	0.212769	0.99995	key	key|target	0.76	TRUE	TRUE	TRUE	target	{'creativeness': 0.76}
Verbal & Grammatical Forms	plural	cars is to car as women is to	woman	men	0.23	0	{'men': 0.23, 'man': 0.15, 'A': 0.04, 'a': 0.04, '?': 0.03}	30	0.00337219	0.22612	0.999701	key	key|target	0.76	TRUE	TRUE	TRUE	target	{'woman': 0.76}
Morphological Modifiers	re+verb_reg	interpret is to reinterpret as organize is to	reorganize	organize	0.21	0	{'organize': 0.21, 'organization': 0.03, 'dis': 0.03, 'order': 0.03, '': 0.02}	6	0.0154419	0.197449	0.99994	key	key|target	0.76	TRUE	TRUE	TRUE	target	{'reorganize': 0.76}
Semantic Hierarchies	hypernyms_misc	fruit is to peach as cream is to	sunscreen	milk	0.21	0	{'milk': 0.21, 'what': 0.07, '______': 0.06, '____': 0.05, 'coffee': 0.05}	1759	4.70877e-06	0.212886	0.982472	key	key|target	0.76	TRUE	TRUE	TRUE	target	{'sunscreen': 0.76}
Semantic Relations	antonyms_binary	out is to in as southwest is to	southeast		0.19	0	{'': 0.06, '?': 0.1, 'a': 0.05}	32	0.00421143	0.187195	0.999681	key	key|target	0.76	TRUE	TRUE	TRUE	target	{'southeast': 0.76}
Morphological Modifiers	verb+tion_irreg	computation is to compute as randomization is to	randomize	probability	0.18	0	{'probability': 0.18, 'randomness': 0.07, 'computation': 0.06, 'der': 0.04, 'sampling': 0.03}	6	0.026001	0.153687	0.99994	key	key|target	0.76	TRUE	TRUE	TRUE	target	{'randomize': 0.76}
Factual Knowledge	UK_city_county	cardiff is to glamorgan as coventry is to	midlands	war	0.17	0	{'war': 0.17, 'west': 0.1, 'what': 0.05, '______': 0.04, 'which': 0.03}	3538	2.25008e-06	0.170896	0.964744	key	key|target	0.76	TRUE	TRUE	TRUE	target	{'midlands': 0.76}
Morphological Modifiers	re+verb_reg	solve is to resolve as upload is to	reupload	upload	0.17	0	{'upload': 0.17, 'uplift': 0.16, 'load': 0.08, 'up': 0.06, 'resolve': 0.04}	124	0.00056839	0.172283	0.998764	key	key|target	0.76	TRUE	TRUE	TRUE	target	{'reupload': 0.76}
Factual Knowledge	capital_world	Angola is to Luanda as Norway is to	oslo	?	0.16	0	{'?': 0.04, '______': 0.09, '__': 0.05}	10	0.0275879	0.131592	0.9999	key	key|target	0.76	TRUE	TRUE	TRUE	target	{'oslo': 0.76}
Semantic Hierarchies	hypernyms_misc	fridge is to appliance as photo is to	picture	camera	0.16	0	{'camera': 0.16, '': 0.03, '?': 0.07, 'a': 0.05}	8	0.0194092	0.1427	0.99992	key	key|target	0.76	TRUE	TRUE	TRUE	target	{'picture': 0.76}
Semantic Hierarchies	hypernyms_misc	jacket is to clothes as photo is to	picture	?	0.16	0	{'?': 0.05, '': 0.1, ':': 0.05, 'a': 0.04}	9	0.022583	0.133667	0.99991	key	key|target	0.76	TRUE	TRUE	TRUE	target	{'picture': 0.76}
Verbal & Grammatical Forms	verb_inf_Ving	existing is to exist as spending is to	spend	being	0.16	0	{'being': 0.16, 'be': 0.13, 'saving': 0.08, 'earning': 0.07, 'have': 0.04}	7	0.0294189	0.129761	0.99993	key	key|target	0.76	TRUE	TRUE	TRUE	target	{'spend': 0.76}
Morphological Modifiers	adj+ly_reg	additionally is to additional as apparently is to	apparent	apparently	0.15	0	{'apparently': 0.15, 'evidently': 0.15, 'clearly': 0.1, 'obviously': 0.07, 'seemingly': 0.06}	7	0.012146	0.136292	0.99993	key	key|target	0.76	TRUE	TRUE	TRUE	target	{'apparent': 0.76}
Verbal & Grammatical Forms	noun_plural_irreg	categories is to category as policies is to	policy	government	0.15	0	{'government': 0.15, 'politics': 0.08, 'law': 0.06, 'business': 0.03, 'company': 0.03}	5	0.0268555	0.118652	0.99995	key	key|target	0.76	TRUE	TRUE	TRUE	target	{'policy': 0.76}
Factual Knowledge	country_language	Philippines is to Tagalog as Taiwan is to	chinese	______	0.14	0	{'______': 0.14, '__': 0.06, 'Mandarin': 0.05, '': 0.04}	9	0.0253906	0.111328	0.99991	key	key|target	0.76	TRUE	TRUE	TRUE	target	{'chinese': 0.76}
Morphological Modifiers	noun+less_reg	odor is to odorless as wit is to	witless	______	0.14	0	{'______': 0.14, '____': 0.05, '__': 0.04, 'dull': 0.03, 'humor': 0.03}	11	0.015625	0.124023	0.99989	key	key|target	0.76	TRUE	TRUE	TRUE	target	{'witless': 0.76}
Semantic Relations	antonyms_binary	front is to back as proceed is to	retreat		0.14	0	{'': 0.08, ':': 0.05, '______': 0.04, '?': 0.03}	30	0.00546265	0.136139	0.999701	key	key|target	0.76	TRUE	TRUE	TRUE	target	{'retreat': 0.76}
Morphological Modifiers	re+verb_reg	assure is to reassure as upload is to	reupload	?	0.13	0	{'?': 0.04, '': 0.05, 'download': 0.06}	53	0.00183868	0.130974	0.999472	key	key|target	0.76	TRUE	TRUE	TRUE	target	{'reupload': 0.76}
Factual Knowledge	name_occupation	aristotle is to philosopher as michelangelo is to	sculptor	artist	0.12	0	{'artist': 0.12, '': 0.08, '?': 0.06, 'what': 0.05, 'a': 0.05}	8	0.0310059	0.0915527	0.99992	key	key|target	0.76	TRUE	TRUE	TRUE	target	{'sculptor': 0.76}
Morphological Modifiers	over+adj_reg	compensated is to overcompensated as qualified is to	overqualified	______	0.12	0	{'______': 0.12, 'un': 0.09, 'disqualified': 0.06, 'dis': 0.05, 'A': 0.04}	19	0.00921631	0.109924	0.999811	key	key|target	0.76	TRUE	TRUE	TRUE	target	{'overqualified': 0.76}
Morphological Modifiers	over+adj_reg	played is to overplayed as stressed is to	overstressed	unst	0.12	0	{'unst': 0.12, '______': 0.1, 'relaxed': 0.08, 'stressed': 0.06, '__': 0.05}	8	0.020874	0.0992432	0.99992	key	key|target	0.76	TRUE	TRUE	TRUE	target	{'overstressed': 0.76}
Semantic Hierarchies	hypernyms_misc	computer is to device as lotion is to	toiletry	soap	0.12	0	{'soap': 0.12, '?': 0.1, 'moistur': 0.05, 'lotion': 0.05, 'what': 0.03}	71	0.00134277	0.119751	0.999292	key	key|target	0.76	TRUE	TRUE	TRUE	target	{'toiletry': 0.76}
Semantic Hierarchies	hypernyms_misc	trousers is to jeans as pad is to	notepad		0.12	0	{'': 0.03, '?': 0.09, 'a': 0.07, ':': 0.04}	99	0.000797272	0.117855	0.999013	key	key|target	0.76	TRUE	TRUE	TRUE	target	{'notepad': 0.76}
Semantic Relations	animal_sound	bray is to mule as chirrup is to	songbird		0.12	0	{'': 0.09, '_____': 0.04, '______': 0.04, ':': 0.04}	180	0.00037384	0.124626	0.998206	key	key|target	0.76	TRUE	TRUE	TRUE	target	{'songbird': 0.76}
Semantic Hierarchies	hypernyms_misc	device is to tv as jar is to	vase	jar	0.11	0	{'jar': 0.11, 'peanut': 0.08, 'pickle': 0.04, 'lid': 0.03, '': 0.03}	45	0.00299072	0.105408	0.999552	key	key|target	0.76	TRUE	TRUE	TRUE	target	{'vase': 0.76}
Semantic Hierarchies	hypernyms_misc	desk is to furniture as perfume is to	toiletry	fragrance	0.11	0	{'fragrance': 0.11, '': 0.05, '?': 0.06, ':': 0.06}	19	0.0128174	0.100952	0.999811	key	key|target	0.76	TRUE	TRUE	TRUE	target	{'toiletry': 0.76}
Semantic Hierarchies	hypernyms_misc	toiletry is to lotion as jar is to	vase		0.11	0	{'': 0.04, '?': 0.1, 'what': 0.07, ':': 0.05}	272	0.000133514	0.112171	0.99729	key	key|target	0.76	TRUE	TRUE	TRUE	target	{'vase': 0.76}
Semantic Relations	opposite	pleasant is to unpleasant as aware is to	unaware		0.11	0	{'': 0.06, '?': 0.05, 'aware': 0.05, '______': 0.04}	15	0.0144043	0.098877	0.999851	key	key|target	0.76	TRUE	TRUE	TRUE	target	{'unaware': 0.76}
Verbal & Grammatical Forms	present_participle	coding is to code as moving is to	move	walking	0.11	0	{'walking': 0.11, 'walk': 0.09, 'motion': 0.07, 'moving': 0.07, 'movement': 0.04}	7	0.0240479	0.0906982	0.99993	key	key|target	0.76	TRUE	TRUE	TRUE	target	{'move': 0.76}
Morphological Modifiers	over+adj_reg	overloaded is to loaded as overzealous is to	zealous		0.1	0	{'': 0.07, ':': 0.07, '______': 0.05, '"': 0.05}	5	0.048584	0.0480957	0.99995	key	key|target	0.76	TRUE	TRUE	TRUE	target	{'zealous': 0.76}
Morphological Modifiers	adj+ness_reg	mad is to madness as unique is to	uniqueness	______	0.1	0	{'______': 0.1, 'common': 0.06, '__': 0.05, 'identical': 0.03, '_____': 0.02}	11	0.012146	0.0835571	0.99989	key	key|target	0.76	TRUE	TRUE	TRUE	target	{'uniqueness': 0.76}
Semantic Hierarchies	hypernyms_misc	furniture is to desk as food is to	pastry	refrigerator	0.1	0	{'refrigerator': 0.1, 'fridge': 0.08, 'pantry': 0.05, 'what': 0.04, 'restaurant': 0.03}	1027	2.00272e-05	0.103984	0.989766	key	key|target	0.76	TRUE	TRUE	TRUE	target	{'pastry': 0.76}
Semantic Relations	animal_sound	cat is to meow as sheep is to	baa	_____	0.1	0	{'_____': 0.1, '______': 0.09, '____': 0.06, 'ble': 0.06, '___': 0.05}	112	0.000740051	0.0993576	0.998884	key	key|target	0.76	TRUE	TRUE	TRUE	target	{'baa': 0.76}
Semantic Relations	antonyms_binary	input is to output as out is to	in	?	0.1	0	{'?': 0.04, 'what': 0.07, 'out': 0.05}	14	0.0116577	0.0859985	0.99986	key	key|target	0.76	TRUE	TRUE	TRUE	target	{'in': 0.76}
Factual Knowledge	capital_world	Fiji is to Suva as Tunisia is to	tunis	:	0.09	0	{':': 0.04, '__': 0.09, '______': 0.04}	9	0.0250244	0.067749	0.99991	key	key|target	0.76	TRUE	TRUE	TRUE	target	{'tunis': 0.76}
Morphological Modifiers	over+adj_reg	booked is to overbooked as developed is to	overdeveloped	______	0.09	0	{'______': 0.09, '': 0.08, 'under': 0.07, '?': 0.06, ':': 0.05}	19	0.00958252	0.0812378	0.999811	key	key|target	0.76	TRUE	TRUE	TRUE	target	{'overdeveloped': 0.76}
Semantic Relations	antonyms_binary	alive is to dead as southwest is to	southeast	northwest	0.09	0	{'northwest': 0.09, 'northeast': 0.06, 'north': 0.06, 'west': 0.06, '______': 0.05}	6	0.0458984	0.0454102	0.99994	key	key|target	0.76	TRUE	TRUE	TRUE	target	{'southeast': 0.76}
Semantic Relations	antonyms_binary	after is to before as southwest is to	southeast	north	0.09	0	{'north': 0.09, 'northeast': 0.08, 'northwest': 0.07, '______': 0.06, '': 0.06}	7	0.0466309	0.0407715	0.99993	key	key|target	0.76	TRUE	TRUE	TRUE	target	{'southeast': 0.76}
Semantic Relations	antonyms_binary	out is to in as under is to	over	?	0.09	0	{'?': 0.09, 'under': 0.06, '': 0.06, 'below': 0.05, 'above': 0.05}	11	0.0205078	0.0654297	0.99989	key	key|target	0.76	TRUE	TRUE	TRUE	target	{'over': 0.76}
Verbal & Grammatical Forms	past_tense	hid is to hiding as spent is to	spending	______	0.09	0	{'______': 0.09, '__': 0.07, '?': 0.05, '': 0.04, '_____': 0.04}	17	0.0109253	0.0803833	0.999831	key	key|target	0.76	TRUE	TRUE	TRUE	target	{'spending': 0.76}
Semantic Hierarchies	hypernyms_misc	toiletry is to deodorant as net is to	hairnet	what	0.08	0	{'what': 0.08, '______': 0.05, '?': 0.04, '': 0.03, 'web': 0.03}	39	0.00396729	0.0756226	0.999611	key	key|target	0.76	TRUE	TRUE	TRUE	target	{'hairnet': 0.76}
Semantic Hierarchies	hypernyms_misc	citrus is to grapefruit as container is to	tub	?	0.08	0	{'?': 0.03, '': 0.05, ':': 0.04, 'box': 0.03}	260	0.000237465	0.0788641	0.997409	key	key|target	0.76	TRUE	TRUE	TRUE	target	{'tub': 0.76}
Semantic Relations	animal_shelter	scorpion is to nest as seal is to	den		0.08	0	{'': 0.04, '_____': 0.05, '______': 0.04, ':': 0.03}	40	0.00364685	0.0739899	0.999601	key	key|target	0.76	TRUE	TRUE	TRUE	target	{'den': 0.76, 'bark': 0.16}
Morphological Modifiers	over+adj_reg	ambitious is to overambitious as stretched is to	overstretched		0.07	0	{'': 0.07, '______': 0.07, '?': 0.06, 'what': 0.05}	5	0.0354004	0.0349121	0.99995	key	key|target	0.76	TRUE	TRUE	TRUE	target	{'overstretched': 0.76}
Morphological Modifiers	over+adj_reg	spent is to overspent as zealous is to	overzealous		0.07	0	{'': 0.05, '______': 0.05, ':': 0.05, '"': 0.04}	58	0.00227356	0.0685272	0.999422	key	key|target	0.76	TRUE	TRUE	TRUE	target	{'overzealous': 0.76}
Semantic Hierarchies	hypernyms_misc	citrus is to lemon as jar is to	vase	?	0.07	0	{'?': 0.07, '': 0.06, '____': 0.06, '______': 0.05, 'what': 0.04}	291	0.000138283	0.0672445	0.9971	key	key|target	0.76	TRUE	TRUE	TRUE	target	{'vase': 0.76}
Semantic Relations	male_female	policeman is to policewoman as sir is to	madam	what	0.07	0	{'what': 0.07, 'lady': 0.05, '____': 0.05, '_': 0.05, '': 0.05}	10	0.0257568	0.0484619	0.9999	key	key|target	0.76	TRUE	TRUE	TRUE	target	{'madam': 0.76}
Morphological Modifiers	noun+less_reg	child is to childless as friction is to	frictionless	smooth	0.06	0	{'smooth': 0.06, 'motion': 0.05, 'heat': 0.05, 'lubric': 0.04, '______': 0.03}	6	0.0314941	0.0236816	0.99994	key	key|target	0.76	TRUE	TRUE	TRUE	target	{'frictionless': 0.76}
Morphological Modifiers	over+adj_reg	protective is to overprotective as stretched is to	overstretched	...	0.06	0	{'...': 0.06, ':': 0.05, '': 0.05, '?': 0.05}	37	0.00476074	0.0533447	0.999631	key	key|target	0.76	TRUE	TRUE	TRUE	target	{'overstretched': 0.76}
Semantic Hierarchies	hypernyms_misc	fuel is to gasoline as card is to	postcard	credit	0.06	0	{'credit': 0.06, 'deck': 0.05, 'diamond': 0.04, '__': 0.04, '____': 0.03}	260	0.000297546	0.0636673	0.997409	key	key|target	0.76	TRUE	TRUE	TRUE	target	{'postcard': 0.76}
Semantic Hierarchies	hypernyms_misc	jewelry is to bracelet as fuel is to	gasoline		0.06	0	{'': 0.06, '______': 0.06, 'what': 0.06, 'car': 0.05, '"': 0.04}	34	0.00500488	0.0560303	0.999661	key	key|target	0.76	TRUE	TRUE	TRUE	target	{'gasoline': 0.76}
Semantic Relations	animal_sound	cicada is to buzz as elk is to	bellow	bug	0.06	0	{'bug': 0.06, '______': 0.06, '': 0.04, '_____': 0.04}	199	0.000362396	0.0604286	0.998017	key	key|target	0.76	TRUE	TRUE	TRUE	target	{'bellow': 0.76}
Semantic Relations	animal_sound	ferret is to dook as monkey is to	chatter		0.06	0	{'': 0.05, 'what': 0.06, '______': 0.06, 'a': 0.04}	66	0.00209045	0.0608978	0.999342	key	key|target	0.76	TRUE	TRUE	TRUE	target	{'chatter': 0.76}
Semantic Relations	antonyms_binary	inside is to outside as proceed is to	retreat	rec	0.06	0	{'rec': 0.06, '______': 0.04, '__': 0.03, '"': 0.03, '': 0.03}	5	0.0255127	0.0357666	0.99995	key	key|target	0.76	TRUE	TRUE	TRUE	target	{'retreat': 0.76}
Semantic Relations	antonyms_binary	inbound is to outbound as proceed is to	retreat	______	0.06	0	{'______': 0.06, 'stop': 0.05, '_____': 0.04, '__': 0.03, '': 0.03}	14	0.0115967	0.0474854	0.99986	key	key|target	0.76	TRUE	TRUE	TRUE	target	{'retreat': 0.76}
Verbal & Grammatical Forms	noun_plural_reg	car is to cars as period is to	periods	what	0.06	0	{'what': 0.06, 'sentence': 0.06, 'sentences': 0.05, 'time': 0.04, '?': 0.04}	19	0.0128174	0.052124	0.999811	key	key|target	0.76	TRUE	TRUE	TRUE	target	{'periods': 0.76}
Morphological Modifiers	verb+tion_irreg	imagination is to imagine as specialization is to	specialize	general	0.04	0	{'general': 0.04, 'understand': 0.03, 'the': 0.03, 'knowledge': 0.02, 'generalize': 0.02}	14	0.0100708	0.0297241	0.99986	key	key|target	0.76	TRUE	TRUE	TRUE	target	{'specialize': 0.76}
Verbal & Grammatical Forms	plural_verbs	play is to plays as provide is to	provides	______	0.04	0	{'______': 0.04, 'services': 0.03, '': 0.03, '__': 0.03}	32	0.00628662	0.0322876	0.999681	key	key|target	0.76	TRUE	TRUE	TRUE	target	{'provides': 0.76}
Semantic Relations	antonyms_binary	ahead is to behind as outward is to	upward	inward	0.82	0	{'inward': 0.82, '______': 0.01, '': 0.01, 'inside': 0.01, '_____': 0.01}	54	0.000440598	0.819872	0.999462	key	key|target	0.75	TRUE	TRUE	TRUE	target	{'upward': 0.75}
Morphological Modifiers	re+verb_reg	assess is to reassess as occur is to	reoccur	occur	0.73	0	{'occur': 0.73, 'happen': 0.06, 'recur': 0.04, 'come': 0.01, 'take': 0.01}	7	0.00592041	0.720642	0.99993	key	key|target	0.75	TRUE	TRUE	TRUE	target	{'reoccur': 0.75}
Morphological Modifiers	adj+ness_reg	connectedness is to connected as sameness is to	same	difference	0.47	0	{'difference': 0.47, '______': 0.05, '__': 0.03, 'different': 0.03, '': 0.03}	47	0.00219727	0.470459	0.999532	key	key|target	0.75	TRUE	TRUE	TRUE	target	{'same': 0.75}
Morphological Modifiers	re+verb_reg	define is to redefine as send is to	resend	send	0.44	0	{'send': 0.44, 'sent': 0.08, 'receive': 0.06, 'deliver': 0.05, 'do': 0.01}	34	0.00161743	0.433929	0.999661	key	key|target	0.75	TRUE	TRUE	TRUE	target	{'resend': 0.75, 'sends': 0.13}
Semantic Hierarchies	hypernyms_misc	cake is to dessert as tv is to	device	entertainment	0.42	0	{'entertainment': 0.42, 'what': 0.03, 'electronics': 0.02, 'screen': 0.02, '?': 0.02}	193	0.000358582	0.41761	0.998077	key	key|target	0.75	TRUE	TRUE	TRUE	target	{'device': 0.75}
Morphological Modifiers	re+verb_reg	connect is to reconnect as grow is to	regrow	grow	0.41	0	{'grow': 0.41, 'shrink': 0.08, '______': 0.03, '__': 0.02, 'growth': 0.02}	106	0.00069046	0.40556	0.998944	key	key|target	0.75	TRUE	TRUE	TRUE	target	{'regrow': 0.75}
Morphological Modifiers	verb+ment_irreg	agreement is to agree as reinforcement is to	reinforce	punishment	0.38	0	{'punishment': 0.38, 'reward': 0.1, 'punish': 0.08, 'habit': 0.01, 'resistance': 0.01}	16	0.00473022	0.37027	0.999841	key	key|target	0.75	TRUE	TRUE	TRUE	target	{'reinforce': 0.75}
Semantic Hierarchies	hypernyms_misc	diary is to journal as mascara is to	makeup	eyel	0.33	0	{'eyel': 0.33, 'eye': 0.11, 'mascara': 0.07, 'lipstick': 0.06, 'ey': 0.05}	5	0.0471191	0.281006	0.99995	key	key|target	0.75	TRUE	TRUE	TRUE	target	{'makeup': 0.75}
Semantic Hierarchies	hypernyms_misc	croissant is to pastry as perfume is to	toiletry	fragrance	0.32	0	{'fragrance': 0.32, 'scent': 0.06, '______': 0.04, 'what': 0.04, 'perfume': 0.03}	44	0.00260925	0.319656	0.999562	key	key|target	0.75	TRUE	TRUE	TRUE	target	{'toiletry': 0.75}
Verbal & Grammatical Forms	noun_plural_irreg	industries is to industry as wives is to	wife	husbands	0.29	0	{'husbands': 0.29, 'women': 0.11, '______': 0.09, '__': 0.04, 'men': 0.03}	136	0.000425339	0.292543	0.998645	key	key|target	0.75	TRUE	TRUE	TRUE	target	{'wife': 0.75}
Semantic Hierarchies	hypernyms_misc	shirt is to clothes as sunscreen is to	cream	skin	0.28	0	{'skin': 0.28, 'what': 0.06, '_____': 0.05, '______': 0.05, '_': 0.05}	803	1.58548e-05	0.279281	0.991998	key	key|target	0.75	TRUE	TRUE	TRUE	target	{'cream': 0.75}
Verbal & Grammatical Forms	noun_plural_reg	player is to players as week is to	weeks	days	0.28	0	{'days': 0.28, 'months': 0.05, '?': 0.03, 'years': 0.04}	16	0.0122681	0.267029	0.999841	key	key|target	0.75	TRUE	TRUE	TRUE	target	{'weeks': 0.75}
Semantic Hierarchies	hypernyms_misc	journal is to diary as cream is to	sunscreen	milk	0.23	0	{'milk': 0.23, '______': 0.07, '____': 0.06, '_____': 0.04, '__': 0.03}	1620	1.00732e-05	0.226552	0.983857	key	key|target	0.75	TRUE	TRUE	TRUE	target	{'sunscreen': 0.75}
Semantic Hierarchies	hypernyms_misc	pad is to notepad as jar is to	vase	jar	0.23	0	{'jar': 0.23, 'java': 0.1, '?': 0.04, 'what': 0.03}	1020	3.31402e-05	0.225553	0.989836	key	key|target	0.75	TRUE	TRUE	TRUE	target	{'vase': 0.75}
Verbal & Grammatical Forms	noun_plural_irreg	industry is to industries as strategy is to	strategies	tactics	0.22	0	{'tactics': 0.22, 'business': 0.07, 'planning': 0.03, 'war': 0.03, '______': 0.02}	7	0.0203857	0.199341	0.99993	key	key|target	0.75	TRUE	TRUE	TRUE	target	{'strategies': 0.75}
Factual Knowledge	capital_world	Fiji is to Suva as Georgia is to	tbilisi	Atlanta	0.21	0	{'Atlanta': 0.21, '______': 0.08, '__': 0.07, ':': 0.05}	468	2.52724e-05	0.214818	0.995336	key	key|target	0.75	TRUE	TRUE	TRUE	target	{'tbilisi': 0.75}
Semantic Hierarchies	hypernyms_misc	picture is to photo as walk is to	sidewalk	run	0.21	0	{'run': 0.21, 'drive': 0.05, '______': 0.04, '_____': 0.03, '"': 0.03}	582	4.74453e-05	0.214796	0.9942	key	key|target	0.75	TRUE	TRUE	TRUE	target	{'sidewalk': 0.75}
Morphological Modifiers	adj+ness_reg	brokenness is to broken as consciousness is to	conscious	consciousness	0.2	0	{'consciousness': 0.2, 'unconscious': 0.15, 'awareness': 0.04, '______': 0.04, '__': 0.03}	6	0.0301514	0.166138	0.99994	key	key|target	0.75	TRUE	TRUE	TRUE	target	{'conscious': 0.75}
Semantic Hierarchies	hypernyms_misc	pastry is to food as sunscreen is to	cream	skin	0.2	0	{'skin': 0.2, 'beach': 0.06, 'sun': 0.05, '______': 0.04, 'the': 0.03}	339	0.000107765	0.203994	0.996622	key	key|target	0.75	TRUE	TRUE	TRUE	target	{'cream': 0.75}
Semantic Hierarchies	hypernyms_misc	brooch is to jewelry as sunscreen is to	cream	skin	0.2	0	{'skin': 0.2, 'beach': 0.06, '______': 0.05, 'what': 0.05, 'the': 0.04}	411	7.72476e-05	0.200118	0.995904	key	key|target	0.75	TRUE	TRUE	TRUE	target	{'cream': 0.75}
Semantic Hierarchies	hypernyms_misc	pad is to notepad as band is to	wristband	band	0.18	0	{'band': 0.18, 'orchestra': 0.09, 'what': 0.04, '?': 0.03}	723	5.55515e-05	0.176702	0.992795	key	key|target	0.75	TRUE	TRUE	TRUE	target	{'wristband': 0.75}
Semantic Hierarchies	hyponyms_misc	limousine is to car as lemon is to	citrus	fruit	0.18	0	{'fruit': 0.18, '': 0.05, ':': 0.05}	8	0.0200195	0.163574	0.99992	key	key|target	0.75	TRUE	TRUE	TRUE	target	{'citrus': 0.75}
Factual Knowledge	UK_city_county	chichester is to sussex as coventry is to	midlands	war	0.17	0	{'war': 0.17, 'what': 0.1, '______': 0.09, '?': 0.05, 'wor': 0.04}	2200	3.18885e-06	0.169919	0.978077	key	key|target	0.75	TRUE	TRUE	TRUE	target	{'midlands': 0.75}
Semantic Hierarchies	hypernyms_misc	juicer is to utensil as vase is to	jar	flower	0.17	0	{'flower': 0.17, '__': 0.09, '______': 0.06, '': 0.04, '?': 0.04}	178	0.000352859	0.171522	0.998226	key	key|target	0.75	TRUE	TRUE	TRUE	target	{'jar': 0.75}
Factual Knowledge	UK_city_county	cambridge is to cambridgeshire as coventry is to	midlands	co	0.16	0	{'co': 0.16, 'west': 0.1, 'war': 0.1, 'what': 0.07, '______': 0.04}	4997	8.15839e-07	0.163085	0.950205	key	key|target	0.75	TRUE	TRUE	TRUE	target	{'midlands': 0.75}
Semantic Hierarchies	hypernyms_misc	skirt is to clothes as tv is to	device	entertainment	0.16	0	{'entertainment': 0.16, '?': 0.04, 'electronics': 0.04, 'tv': 0.04, '': 0.04}	164	0.000488281	0.163574	0.998366	key	key|target	0.75	TRUE	TRUE	TRUE	target	{'device': 0.75}
Semantic Relations	antonyms_binary	drop is to lift as forward is to	backward	push	0.15	0	{'push': 0.15, '': 0.03, 'pull': 0.04, 'move': 0.03}	8	0.0236816	0.130615	0.99992	key	key|target	0.75	TRUE	TRUE	TRUE	target	{'backward': 0.75}
Morphological Modifiers	over+adj_reg	compensated is to overcompensated as confident is to	overconfident	______	0.14	0	{'______': 0.14, '__': 0.05, '____': 0.05, '_': 0.03, 'what': 0.03}	10	0.0236816	0.113037	0.9999	key	key|target	0.75	TRUE	TRUE	TRUE	target	{'overconfident': 0.75}
Morphological Modifiers	adj+ly_reg	clinical is to clinically as rare is to	rarely	______	0.14	0	{'______': 0.14, 'common': 0.12, '__': 0.05, '_____': 0.04, '____': 0.03}	45	0.00294495	0.138657	0.999552	key	key|target	0.75	TRUE	TRUE	TRUE	target	{'rarely': 0.75}
Semantic Hierarchies	hypernyms_misc	shelf is to furniture as tv is to	device	?	0.14	0	{'?': 0.06, 'electronics': 0.08, 'entertainment': 0.06, 'appliance': 0.06}	132	0.000324249	0.136395	0.998685	key	key|target	0.75	TRUE	TRUE	TRUE	target	{'device': 0.75}
Semantic Relations	antonyms_binary	downslope is to upslope as drop is to	lift	?	0.14	0	{'?': 0.05, '': 0.1, 'rise': 0.06, 'climb': 0.04}	16	0.0120239	0.125671	0.999841	key	key|target	0.75	TRUE	TRUE	TRUE	target	{'lift': 0.75}
Morphological Modifiers	adj+ly_reg	clinical is to clinically as unique is to	uniquely	______	0.13	0	{'______': 0.13, '__': 0.08, '_____': 0.04, '____': 0.03, '?': 0.03}	26	0.00567627	0.12323	0.999741	key	key|target	0.75	TRUE	TRUE	TRUE	target	{'uniquely': 0.75}
Semantic Hierarchies	hypernyms_misc	fuel is to gasoline as makeup is to	mascara	beauty	0.13	0	{'beauty': 0.13, 'a': 0.08, 'your': 0.04, 'natural': 0.03, 'the': 0.03}	44	0.00305176	0.126831	0.999562	key	key|target	0.75	TRUE	TRUE	TRUE	target	{'mascara': 0.75}
Semantic Hierarchies	hypernyms_misc	desk is to furniture as tv is to	device	?	0.13	0	{'?': 0.06, 'appliance': 0.09, 'entertainment': 0.07, 'electronics': 0.07}	95	0.000621796	0.125355	0.999053	key	key|target	0.75	TRUE	TRUE	TRUE	target	{'device': 0.75}
Semantic Relations	antonyms_binary	up is to down as dismiss is to	employ	?	0.13	0	{'?': 0.05, '': 0.05, ':': 0.03}	264	0.000189781	0.129693	0.997369	key	key|target	0.75	TRUE	TRUE	TRUE	target	{'employ': 0.75}
Morphological Modifiers	verb+ment_irreg	agree is to agreement as enroll is to	enrollment		0.12	0	{'': 0.07, '?': 0.04, ':': 0.04}	31	0.00540161	0.117645	0.999691	key	key|target	0.75	TRUE	TRUE	TRUE	target	{'enrollment': 0.75}
Morphological Modifiers	noun+less_reg	arm is to armless as friend is to	friendless	enemy	0.12	0	{'enemy': 0.12, '______': 0.06, '?': 0.05, '': 0.04, '____': 0.04}	27	0.00964355	0.11145	0.999731	key	key|target	0.75	TRUE	TRUE	TRUE	target	{'friendless': 0.75}
Morphological Modifiers	re+verb_reg	decorate is to redecorate as grow is to	regrow	shrink	0.12	0	{'shrink': 0.12, 'grow': 0.11, '?': 0.03, '': 0.05}	668	3.88622e-05	0.123008	0.993343	key	key|target	0.75	TRUE	TRUE	TRUE	target	{'regrow': 0.75}
Semantic Hierarchies	hypernyms_misc	fridge is to appliance as grapefruit is to	citrus	fruit	0.12	0	{'fruit': 0.12, '': 0.05, '?': 0.05, '______': 0.04, ':': 0.03}	27	0.00823975	0.112854	0.999731	key	key|target	0.75	TRUE	TRUE	TRUE	target	{'citrus': 0.75}
Semantic Hierarchies	hypernyms_misc	card is to postcard as container is to	tub	container	0.12	0	{'container': 0.12, ':': 0.09, '?': 0.06, '': 0.06, 'what': 0.05}	364	0.000107765	0.118056	0.996373	key	key|target	0.75	TRUE	TRUE	TRUE	target	{'tub': 0.75}
Factual Knowledge	UK_city_county	leeds is to yorkshire as leicester is to	midlands	le	0.11	0	{'le': 0.11, '______': 0.06, 'not': 0.06, 'what': 0.05, '': 0.04}	2603	3.7998e-06	0.113277	0.974061	key	key|target	0.75	TRUE	TRUE	TRUE	target	{'midlands': 0.75}
Factual Knowledge	UK_city_county	brighton is to sussex as coventry is to	midlands	war	0.11	0	{'war': 0.11, 'merc': 0.09, '______': 0.08, 'what': 0.06, 'west': 0.03}	822	1.93119e-05	0.111309	0.991809	key	key|target	0.75	TRUE	TRUE	TRUE	target	{'midlands': 0.75}
Morphological Modifiers	re+verb_reg	distribute is to redistribute as upload is to	reupload	upload	0.11	0	{'upload': 0.11, '': 0.05, '__': 0.06, 'what': 0.05}	26	0.00759888	0.104218	0.999741	key	key|target	0.75	TRUE	TRUE	TRUE	target	{'reupload': 0.75}
Semantic Hierarchies	hypernyms_misc	sofa is to furniture as vase is to	jar	?	0.11	0	{'?': 0.11, '': 0.08, 'pottery': 0.05, ':': 0.03, '"': 0.03}	388	8.01086e-05	0.105877	0.996134	key	key|target	0.75	TRUE	TRUE	TRUE	target	{'jar': 0.75}
Semantic Hierarchies	hypernyms_misc	appliance is to fridge as sandwich is to	hamburger	?	0.11	0	{'?': 0.11, ':': 0.07, 'what': 0.06, '______': 0.05, '': 0.04}	185	0.000295639	0.108103	0.998156	key	key|target	0.75	TRUE	TRUE	TRUE	target	{'hamburger': 0.75}
Semantic Relations	animal_shelter	hedgehog is to nest as herring is to	sea	school	0.11	0	{'school': 0.11, 'sho': 0.1, '______': 0.08, '_____': 0.05, '': 0.04}	40	0.0030365	0.103897	0.999601	key	key|target	0.75	TRUE	TRUE	TRUE	target	{'sea': 0.75}
Morphological Modifiers	verb+ment_irreg	agree is to agreement as fulfill is to	fulfillment		0.1	0	{'': 0.05, '?': 0.05, ':': 0.05, '______': 0.04}	31	0.0057373	0.0899658	0.999691	key	key|target	0.75	TRUE	TRUE	TRUE	target	{'fulfillment': 0.75}
Morphological Modifiers	over+adj_reg	overbooked is to booked as overzealous is to	zealous	:	0.1	0	{':': 0.05, '': 0.07, '?': 0.05}	10	0.0197754	0.0808105	0.9999	key	key|target	0.75	TRUE	TRUE	TRUE	target	{'zealous': 0.75}
Morphological Modifiers	un+adj_reg	controlled is to uncontrolled as interrupted is to	uninterrupted	interrupted	0.1	0	{'interrupted': 0.1, '': 0.09, '?': 0.06, '______': 0.05, '__': 0.05}	5	0.0432129	0.0603027	0.99995	key	key|target	0.75	TRUE	TRUE	TRUE	target	{'uninterrupted': 0.75}
Semantic Hierarchies	hypernyms_misc	dessert is to cake as picture is to	photo	"	0.1	0	{'"': 0.04, '______': 0.06, 'picture': 0.03, 'what': 0.03}	73	0.00175476	0.0939484	0.999273	key	key|target	0.75	TRUE	TRUE	TRUE	target	{'photo': 0.75}
Semantic Hierarchies	hypernyms_misc	dessert is to cake as makeup is to	mascara	"	0.1	0	{'"': 0.1, '______': 0.06, 'what': 0.05, '____': 0.04, 'face': 0.03}	40	0.00479126	0.0918884	0.999601	key	key|target	0.75	TRUE	TRUE	TRUE	target	{'mascara': 0.75}
Semantic Relations	animal_sound	cicada is to buzz as fox is to	howl	bark	0.1	0	{'bark': 0.1, '_____': 0.05, 'a': 0.05, '______': 0.05, '__': 0.04}	15	0.0108643	0.0863037	0.999851	key	key|target	0.75	TRUE	TRUE	TRUE	target	{'howl': 0.75}
Semantic Relations	male_female	fisherwoman is to fisherman as superwoman is to	superman	?	0.1	0	{'?': 0.1, 'what': 0.09, '__': 0.08, ':': 0.06, '______': 0.06}	9	0.0268555	0.0761719	0.99991	key	key|target	0.75	TRUE	TRUE	TRUE	target	{'superman': 0.75}
Verbal & Grammatical Forms	noun_plural_irreg	agencies is to agency as women is to	woman	______	0.1	0	{'______': 0.1, 'women': 0.06, '__': 0.05, '____': 0.05, '_____': 0.04}	14	0.00915527	0.0958252	0.99986	key	key|target	0.75	TRUE	TRUE	TRUE	target	{'woman': 0.75}
Factual Knowledge	country_capital	Nigeria is to Abuja as Romania is to	bucharest	what	0.09	0	{'what': 0.09, ':': 0.06, '?': 0.06, '(': 0.05}	9	0.029541	0.0559082	0.99991	key	key|target	0.75	TRUE	TRUE	TRUE	target	{'bucharest': 0.75}
Factual Knowledge	capital_world	Nigeria is to Abuja as Romania is to	bucharest	what	0.09	0	{'what': 0.09, ':': 0.06, '?': 0.06, '(': 0.05}	9	0.029541	0.0559082	0.99991	key	key|target	0.75	TRUE	TRUE	TRUE	target	{'bucharest': 0.75}
Morphological Modifiers	over+adj_reg	booked is to overbooked as stretched is to	overstretched	?	0.09	0	{'?': 0.09, '______': 0.07, 'what': 0.07, ':': 0.07, '': 0.06}	29	0.00463867	0.0856934	0.999711	key	key|target	0.75	TRUE	TRUE	TRUE	target	{'overstretched': 0.75}
Morphological Modifiers	over+adj_reg	grown is to overgrown as qualified is to	overqualified	______	0.09	0	{'______': 0.09, '?': 0.07, 'un': 0.06, '': 0.05, 'A': 0.04}	23	0.00787354	0.0824585	0.999771	key	key|target	0.75	TRUE	TRUE	TRUE	target	{'overqualified': 0.75}
Morphological Modifiers	over+adj_reg	overprotected is to protected as oversized is to	sized	:	0.09	0	{':': 0.05, 'what': 0.04, '"': 0.04, '': 0.03}	5	0.0336914	0.0576172	0.99995	key	key|target	0.75	TRUE	TRUE	TRUE	target	{'sized': 0.75}
Semantic Hierarchies	hyponyms_misc	chapel is to church as cake is to	dessert	_	0.09	0	{'_': 0.09, '______': 0.06, '__': 0.05, 'bakery': 0.04, '_____': 0.03}	45	0.00405884	0.0823669	0.999552	key	key|target	0.75	TRUE	TRUE	TRUE	target	{'dessert': 0.75}
Semantic Hierarchies	hypernyms_misc	book is to notebook as card is to	postcard	deck	0.09	0	{'deck': 0.09, '____': 0.08, '__': 0.07, '______': 0.06, 'card': 0.06}	89	0.00102997	0.0888138	0.999113	key	key|target	0.75	TRUE	TRUE	TRUE	target	{'postcard': 0.75}
Semantic Relations	antonyms_binary	posterior is to anterior as dismiss is to	employ	dismiss	0.09	0	{'dismiss': 0.09, '______': 0.05, '____': 0.04, '': 0.04, '_____': 0.04}	95	0.00141907	0.0923309	0.999053	key	key|target	0.75	TRUE	TRUE	TRUE	target	{'employ': 0.75}
Verbal & Grammatical Forms	plural_verbs	scream is to screams as describe is to	describes	______	0.09	0	{'______': 0.09, 'a': 0.05, '__': 0.04, '____': 0.04, '': 0.04}	9	0.0263672	0.0600586	0.99991	key	key|target	0.75	TRUE	TRUE	TRUE	target	{'describes': 0.75}
Morphological Modifiers	verb+tion_irreg	customization is to customize as exploration is to	explore	exploit	0.08	0	{'exploit': 0.08, 'exploitation': 0.08, 'discovery': 0.04, '': 0.03, 'play': 0.03}	108	0.001297	0.0812225	0.998924	key	key|target	0.75	TRUE	TRUE	TRUE	target	{'explore': 0.75}
Morphological Modifiers	noun+less_reg	expression is to expressionless as window is to	windowless	?	0.08	0	{'?': 0.08, 'door': 0.08, 'glass': 0.06, ':': 0.06, '______': 0.04}	6	0.0419922	0.0415039	0.99994	key	key|target	0.75	TRUE	TRUE	TRUE	target	{'windowless': 0.75}
Morphological Modifiers	over+adj_reg	powered is to overpowered as sized is to	oversized	unders	0.08	0	{'unders': 0.08, 'sized': 0.06, 'what': 0.06, '______': 0.05, '?': 0.03}	5	0.0322266	0.0454102	0.99995	key	key|target	0.75	TRUE	TRUE	TRUE	target	{'oversized': 0.75}
Morphological Modifiers	over+adj_reg	protected is to overprotected as stretched is to	overstretched		0.08	0	{'': 0.05, '______': 0.06, '?': 0.04, 'what': 0.04}	92	0.00141907	0.0762177	0.999083	key	key|target	0.75	TRUE	TRUE	TRUE	target	{'overstretched': 0.75}
Morphological Modifiers	un+adj_reg	aware is to unaware as wanted is to	unwanted	______	0.08	0	{'______': 0.08, '_____': 0.07, ':': 0.05, '?': 0.05, '': 0.05}	6	0.0336914	0.046875	0.99994	key	key|target	0.75	TRUE	TRUE	TRUE	target	{'unwanted': 0.75}
Morphological Modifiers	adj+ness_reg	interesting is to interestingness as mad is to	madness	anger	0.08	0	{'anger': 0.08, 'sane': 0.07, 'insanity': 0.05, 'sanity': 0.05, 'angry': 0.05}	7	0.0378418	0.0373535	0.99993	key	key|target	0.75	TRUE	TRUE	TRUE	target	{'madness': 0.75}
Semantic Relations	antonyms_binary	alive is to dead as away is to	toward	home	0.08	0	{'home': 0.08, '______': 0.06, 'where': 0.06, 'near': 0.05, 'here': 0.04}	8	0.0244141	0.0556641	0.99992	key	key|target	0.75	TRUE	TRUE	TRUE	target	{'toward': 0.75}
Semantic Relations	male_female	sculptor is to sculptress as sir is to	madam	_	0.08	0	{'_': 0.08, 'what': 0.06, '?': 0.05, '______': 0.05, '____': 0.05}	22	0.00976562	0.0717773	0.999781	key	key|target	0.75	TRUE	TRUE	TRUE	target	{'madam': 0.75}
Semantic Relations	male_female	cow is to bull as madam is to	sir		0.08	0	{'': 0.07, ':': 0.04, '?': 0.05}	180	0.000375748	0.0757961	0.998206	key	key|target	0.75	TRUE	TRUE	TRUE	target	{'sir': 0.75}
Verbal & Grammatical Forms	past_tense	sleeping is to slept as describing is to	described	______	0.08	0	{'______': 0.08, '"': 0.04, '____': 0.04, '': 0.03}	12	0.015625	0.0639648	0.99988	key	key|target	0.75	TRUE	TRUE	TRUE	target	{'described': 0.75, 'describes': 0.11}
Factual Knowledge	capital_world	Uruguay is to Montevideo as Oman is to	muscat	?	0.07	0	{'?': 0.04, ':': 0.05, '____': 0.05, '?"': 0.04}	25	0.010376	0.0594482	0.999751	key	key|target	0.75	TRUE	TRUE	TRUE	target	{'muscat': 0.75}
Morphological Modifiers	noun+less_reg	bone is to boneless as expression is to	expressionless	______	0.07	0	{'______': 0.07, '?': 0.04, '__': 0.04, '': 0.04}	19	0.00915527	0.0582275	0.999811	key	key|target	0.75	TRUE	TRUE	TRUE	target	{'expressionless': 0.75}
Semantic Hierarchies	hypernyms_misc	furniture is to desk as journal is to	diary		0.07	0	{'': 0.07, '?': 0.05, 'what': 0.03, 'a': 0.03}	9	0.0211182	0.0526123	0.99991	key	key|target	0.75	TRUE	TRUE	TRUE	target	{'diary': 0.75}
Semantic Hierarchies	hypernyms_misc	deodorant is to toiletry as diary is to	journal		0.07	0	{'': 0.06, ':': 0.05, '"': 0.04, '?': 0.03}	6	0.0249023	0.0424805	0.99994	key	key|target	0.75	TRUE	TRUE	TRUE	target	{'journal': 0.75}
Semantic Hierarchies	hypernyms_misc	sweater is to clothes as toothbrush is to	brush	____	0.07	0	{'____': 0.07, 'what': 0.05, '__': 0.05, '?': 0.04, '': 0.04}	63	0.0022583	0.0700073	0.999372	key	key|target	0.75	TRUE	TRUE	TRUE	target	{'brush': 0.75}
Semantic Hierarchies	hypernyms_misc	lemon is to citrus as perfume is to	toiletry	fragrance	0.07	0	{'fragrance': 0.07, '': 0.05, 'what': 0.05, ':': 0.04}	237	0.000208855	0.0720568	0.997638	key	key|target	0.75	TRUE	TRUE	TRUE	target	{'toiletry': 0.75}
Semantic Relations	animal_sound	seal is to bark as whale is to	sing	______	0.07	0	{'______': 0.07, '_____': 0.06, '': 0.04, '____': 0.04}	18	0.012085	0.057251	0.999821	key	key|target	0.75	TRUE	TRUE	TRUE	target	{'sing': 0.75}
Semantic Relations	male_female	heroine is to hero as madam is to	sir	gentleman	0.07	0	{'gentleman': 0.07, '______': 0.06, 'what': 0.06, '____': 0.06, 'master': 0.06}	25	0.00628662	0.0610962	0.999751	key	key|target	0.75	TRUE	TRUE	TRUE	target	{'sir': 0.75}
Verbal & Grammatical Forms	noun_plural_irreg	categories is to category as losses is to	loss	profit	0.07	0	{'profit': 0.07, 'losses': 0.05, 'wins': 0.05, 'profits': 0.03, '__': 0.02}	8	0.0141602	0.0576172	0.99992	key	key|target	0.75	TRUE	TRUE	TRUE	target	{'loss': 0.75}
Morphological Modifiers	superlative	long is to longest as hot is to	hottest	?	0.06	0	{'?': 0.06, 'A': 0.06, ':': 0.05, 'a': 0.05}	6	0.0334473	0.0290527	0.99994	key	key|target	0.75	TRUE	TRUE	TRUE	target	{'hottest': 0.75}
Semantic Hierarchies	hypernyms_misc	deodorant is to toiletry as grapefruit is to	citrus	:	0.06	0	{':': 0.05, 'fruit': 0.05, '': 0.05, '______': 0.04}	11	0.0175781	0.0402832	0.99989	key	key|target	0.75	TRUE	TRUE	TRUE	target	{'citrus': 0.75}
Semantic Hierarchies	hypernyms_misc	jewelry is to bracelet as sandwich is to	hamburger	what	0.06	0	{'what': 0.06, '?': 0.06, '': 0.05, '______': 0.04, '"': 0.03}	43	0.00408936	0.0579224	0.999572	key	key|target	0.75	TRUE	TRUE	TRUE	target	{'hamburger': 0.75}
Semantic Relations	animal_sound	buzz is to fly as neigh is to	horse	______	0.06	0	{'______': 0.06, 'neigh': 0.05, 'br': 0.05, '': 0.05, '_____': 0.04}	6	0.034668	0.026123	0.99994	key	key|target	0.75	TRUE	TRUE	TRUE	target	{'horse': 0.75}
Semantic Relations	antonyms_gradable	solid is to gaseous as flat is to	lumpy	"	0.06	0	{'"': 0.06, '__': 0.04, '___': 0.04, 'what': 0.04, '_____': 0.04}	834	4.45843e-05	0.0551312	0.991689	key	key|target	0.75	TRUE	TRUE	TRUE	target	{'lumpy': 0.75}
Morphological Modifiers	adj+ly_reg	clinically is to clinical as strongly is to	strong	strongly	0.05	0	{'strongly': 0.05, 'what': 0.05, '______': 0.04, '_____': 0.04, '': 0.04}	6	0.0218506	0.0303955	0.99994	key	key|target	0.75	TRUE	TRUE	TRUE	target	{'strong': 0.75}
Semantic Relations	antonyms_binary	below is to above as outward is to	upward	inward	0.91	0	{'inward': 0.91, 'in': 0.01, 'inside': 0.01, 'within': 0.0, '': 0.0}	12	0.00164032	0.90461	0.99988	key	key|target	0.74	TRUE	TRUE	TRUE	target	{'upward': 0.74}
Morphological Modifiers	re+verb_reg	cognize is to recognize as discover is to	rediscover	discover	0.65	0	{'discover': 0.65, 'find': 0.13, 'uncover': 0.02, 'come': 0.01, 'invent': 0.01}	28	0.00149536	0.650848	0.999721	key	key|target	0.74	TRUE	TRUE	TRUE	target	{'rediscover': 0.74}
Morphological Modifiers	re+verb_reg	confirm is to reconfirm as define is to	redefine	define	0.65	0	{'define': 0.65, 'specify': 0.02, 'clarify': 0.01, 'explain': 0.01, 'determine': 0.01}	6	0.00848389	0.64386	0.99994	key	key|target	0.74	TRUE	TRUE	TRUE	target	{'redefine': 0.74}
Factual Knowledge	capital_world	Moldova is to Chisinau as Philippines is to	manila	?	0.49	0	{'?': 0.49, '': 0.09, '______': 0.07, 'what': 0.06, '__': 0.05}	13	0.00805664	0.484131	0.99987	key	key|target	0.74	TRUE	TRUE	TRUE	target	{'manila': 0.74}
Morphological Modifiers	over+adj_reg	loaded is to overloaded as sized is to	oversized	sized	0.45	0	{'sized': 0.45, '': 0.04, '______': 0.03, '__': 0.03, '?': 0.02}	9	0.0163574	0.432861	0.99991	key	key|target	0.74	TRUE	TRUE	TRUE	target	{'oversized': 0.74}
Morphological Modifiers	re+verb_reg	adjust is to readjust as occur is to	reoccur	occur	0.45	0	{'occur': 0.45, 'happen': 0.24, 'recur': 0.04, 'come': 0.04, 'be': 0.03}	11	0.0032959	0.442017	0.99989	key	key|target	0.74	TRUE	TRUE	TRUE	target	{'reoccur': 0.74}
Verbal & Grammatical Forms	noun_plural_irreg	formulae is to formula as wives is to	wife	husbands	0.4	0	{'husbands': 0.4, 'women': 0.16, 'wives': 0.05, 'husband': 0.04, '______': 0.01}	16	0.00515747	0.391327	0.999841	key	key|target	0.74	TRUE	TRUE	TRUE	target	{'wife': 0.74}
Morphological Modifiers	re+verb_reg	consider is to reconsider as define is to	redefine	define	0.39	0	{'define': 0.39, 'determine': 0.08, 'give': 0.04, 'specify': 0.02, 'explain': 0.02}	5	0.0134888	0.381042	0.99995	key	key|target	0.74	TRUE	TRUE	TRUE	target	{'redefine': 0.74}
Morphological Modifiers	re+verb_reg	connect is to reconnect as engage is to	reengage	engage	0.37	0	{'engage': 0.37, 'eng': 0.06, 'dis': 0.06, '__': 0.03, '______': 0.02}	13	0.00674438	0.360443	0.99987	key	key|target	0.74	TRUE	TRUE	TRUE	target	{'reengage': 0.74}
Factual Knowledge	capital_world	Senegal is to Dakar as Philippines is to	manila	?	0.36	0	{'?': 0.1, '': 0.05, '______': 0.05}	5	0.0456543	0.313721	0.99995	key	key|target	0.74	TRUE	TRUE	TRUE	target	{'manila': 0.74}
Morphological Modifiers	re+verb_reg	install is to reinstall as upload is to	reupload	download	0.36	0	{'download': 0.36, 'upload': 0.1, 'commit': 0.04, 'update': 0.02, 'down': 0.01}	59	0.00134277	0.359985	0.999412	key	key|target	0.74	TRUE	TRUE	TRUE	target	{'reupload': 0.74}
Factual Knowledge	capital_world	Indonesia is to Jakarta as Oman is to	muscat	?	0.34	0	{'?': 0.05, ':': 0.04, 'what': 0.04}	82	0.000537872	0.3354	0.999183	key	key|target	0.74	TRUE	TRUE	TRUE	target	{'muscat': 0.74}
Semantic Relations	animal_shelter	bat is to cave as tiger is to	den	jungle	0.34	0	{'jungle': 0.34, 'forest': 0.04, 'zoo': 0.04, '_____': 0.04, '______': 0.04}	49	0.0016861	0.340111	0.999512	key	key|target	0.74	TRUE	TRUE	TRUE	target	{'den': 0.74}
Morphological Modifiers	adj+ly_reg	internationally is to international as strongly is to	strong	strongly	0.33	0	{'strongly': 0.33, 'weak': 0.07, '______': 0.03, 'firmly': 0.02, 'forcefully': 0.02}	9	0.0106201	0.319458	0.99991	key	key|target	0.74	TRUE	TRUE	TRUE	target	{'strong': 0.74}
Semantic Relations	animal_sound	alpaca is to bray as songbird is to	chirrup	sing	0.33	0	{'sing': 0.33, '______': 0.06, '_____': 0.05, '__': 0.05, 'war': 0.03}	6	0.0227051	0.311279	0.99994	key	key|target	0.74	TRUE	TRUE	TRUE	target	{'chirrup': 0.74}
Semantic Hierarchies	hypernyms_misc	brooch is to jewelry as denim is to	fabric	clothing	0.32	0	{'clothing': 0.32, 'jeans': 0.13, 'clothes': 0.06, 'pants': 0.06, 'fashion': 0.04}	5	0.0339355	0.28833	0.99995	key	key|target	0.74	TRUE	TRUE	TRUE	target	{'fabric': 0.74}
Semantic Relations	family	her is to his as mother is to	father	her	0.32	0	{'her': 0.32, 'his': 0.27, 'him': 0.16, 'son': 0.02, 'he': 0.02}	5	0.0158691	0.304443	0.99995	key	key|target	0.74	TRUE	TRUE	TRUE	target	{'father': 0.74}
Morphological Modifiers	re+verb_reg	assure is to reassure as commend is to	recommend	commend	0.31	0	{'commend': 0.31, '______': 0.07, '?': 0.06, '__': 0.06, '': 0.04}	18	0.00964355	0.29895	0.999821	key	key|target	0.74	TRUE	TRUE	TRUE	target	{'recommend': 0.74}
Verbal & Grammatical Forms	verb_Ving_Ved	followed is to following as proposed is to	proposing	proposed	0.31	0	{'proposed': 0.31, '': 0.04, 'suggested': 0.03, '______': 0.03, 'proposition': 0.02}	36	0.00393677	0.308563	0.999641	key	key|target	0.74	TRUE	TRUE	TRUE	target	{'proposing': 0.74}
Factual Knowledge	UK_city_county	newcastle is to northumberland as wolverhampton is to	midlands	staff	0.3	0	{'staff': 0.3, '______': 0.07, 'what': 0.07, 'which': 0.03, 'the': 0.03}	3570	1.66893e-06	0.298826	0.964425	key	key|target	0.74	TRUE	TRUE	TRUE	target	{'midlands': 0.74}
Morphological Modifiers	re+verb_reg	cognize is to recognize as develop is to	redevelop	grow	0.3	0	{'grow': 0.3, 'develop': 0.29, 'evolve': 0.03, 'become': 0.03, 'come': 0.02}	218	0.000150681	0.304537	0.997828	key	key|target	0.74	TRUE	TRUE	TRUE	target	{'redevelop': 0.74}
Verbal & Grammatical Forms	noun_plural_irreg	categories is to category as children is to	child	parent	0.29	0	{'parent': 0.29, 'family': 0.2, 'parents': 0.17, 'father': 0.03, 'mother': 0.03}	13	0.00689697	0.286072	0.99987	key	key|target	0.74	TRUE	TRUE	TRUE	target	{'child': 0.74}
Verbal & Grammatical Forms	noun_plural_irreg	security is to securities as society is to	societies	individuals	0.28	0	{'individuals': 0.28, 'social': 0.07, 'the': 0.05, 'people': 0.03, 'individual': 0.02}	14	0.0158691	0.263428	0.99986	key	key|target	0.74	TRUE	TRUE	TRUE	target	{'societies': 0.74}
Factual Knowledge	UK_city_county	carlisle is to cumbria as coventry is to	midlands	west	0.25	0	{'west': 0.25, 'war': 0.15, 'the': 0.12, '______': 0.05, 'what': 0.03}	1664	4.64916e-06	0.245113	0.983418	key	key|target	0.74	TRUE	TRUE	TRUE	target	{'midlands': 0.74}
Semantic Relations	animal_sound	bark is to dog as grunt is to	gorilla	pig	0.25	0	{'pig': 0.25, 'hog': 0.13, 'soldier': 0.05, '': 0.04, 'a': 0.03}	95	0.000663757	0.251289	0.999053	key	key|target	0.74	TRUE	TRUE	TRUE	target	{'gorilla': 0.74}
Verbal & Grammatical Forms	present_participle	debugging is to debug as going is to	go	walking	0.24	0	{'walking': 0.24, 'going': 0.11, 'travel': 0.05, 'walk': 0.05, 'getting': 0.04}	5	0.0308838	0.21228	0.99995	key	key|target	0.74	TRUE	TRUE	TRUE	target	{'go': 0.74}
Semantic Relations	antonyms_binary	downslope is to upslope as outward is to	upward	inward	0.21	0	{'inward': 0.21, '': 0.1, '?': 0.09, ':': 0.05, '"': 0.04}	256	0.000121117	0.205934	0.997449	key	key|target	0.74	TRUE	TRUE	TRUE	target	{'upward': 0.74}
Semantic Relations	antonyms_binary	forget is to remember as inverse is to	reverse	direct	0.21	0	{'direct': 0.21, 'product': 0.11, 'inverse': 0.06, 'opposite': 0.05, 'division': 0.05}	14	0.00994873	0.196106	0.99986	key	key|target	0.74	TRUE	TRUE	TRUE	target	{'reverse': 0.74}
Semantic Relations	antonyms_binary	exit is to entrance as outward is to	upward	inward	0.21	0	{'inward': 0.21, '"': 0.03, '?': 0.05, ':': 0.03}	206	0.000239372	0.214604	0.997947	key	key|target	0.74	TRUE	TRUE	TRUE	target	{'upward': 0.74}
Factual Knowledge	UK_city_county	bradford is to yorkshire as dundee is to	lowlands	sc	0.2	0	{'sc': 0.2, '__': 0.06, '_': 0.05, '-': 0.05, 'f': 0.05}	64	0.00119019	0.199005	0.999362	key	key|target	0.74	TRUE	TRUE	TRUE	target	{'lowlands': 0.74}
Semantic Relations	animal_sound	alpaca is to bray as cicada is to	buzz	sing	0.2	0	{'sing': 0.2, 'chir': 0.1, '__': 0.04, 'hum': 0.03, 'str': 0.03}	5	0.0250244	0.171265	0.99995	key	key|target	0.74	TRUE	TRUE	TRUE	target	{'buzz': 0.74}
Morphological Modifiers	superlative	brightest is to bright as fastest is to	fast	fastest	0.19	0	{'fastest': 0.19, 'slow': 0.09, '______': 0.05, '_____': 0.04, '': 0.03}	5	0.0294189	0.161987	0.99995	key	key|target	0.74	TRUE	TRUE	TRUE	target	{'fast': 0.74}
Semantic Relations	male_female	actor is to actress as tiger is to	tigress	lion	0.19	0	{'lion': 0.19, '______': 0.12, '_____': 0.06, 'tiger': 0.05, 'what': 0.05}	139	0.000350952	0.187149	0.998615	key	key|target	0.74	TRUE	TRUE	TRUE	target	{'tigress': 0.74}
Factual Knowledge	capital_world	Stockholm is to Sweden as Ankara is to	turkey	what	0.18	0	{'what': 0.18, '______': 0.13, '__': 0.08, '?': 0.06, 'which': 0.06}	6	0.0422363	0.135498	0.99994	key	key|target	0.74	TRUE	TRUE	TRUE	target	{'turkey': 0.74}
Morphological Modifiers	adj+ly_reg	similarly is to similar as visually is to	visual	visually	0.17	0	{'visually': 0.17, '______': 0.05, 'a': 0.04, 'tactile': 0.04, '_____': 0.03}	65	0.00238037	0.164612	0.999352	key	key|target	0.74	TRUE	TRUE	TRUE	target	{'visual': 0.74}
Semantic Relations	animal_shelter	hedgehog is to nest as pig is to	sty	_____	0.17	0	{'_____': 0.17, '______': 0.09, 'bur': 0.07, '___': 0.03, '__': 0.03}	6	0.0252686	0.139771	0.99994	key	key|target	0.74	TRUE	TRUE	TRUE	target	{'sty': 0.74}
Verbal & Grammatical Forms	noun_plural_irreg	theories is to theory as wives is to	wife	women	0.17	0	{'women': 0.17, 'husbands': 0.14, 'marriage': 0.08, 'husband': 0.06, 'wives': 0.04}	11	0.0128174	0.153198	0.99989	key	key|target	0.74	TRUE	TRUE	TRUE	target	{'wife': 0.74}
Verbal & Grammatical Forms	verb_inf_Ved	ensure is to ensured as provide is to	provided		0.17	0	{'': 0.06, '?': 0.07, ':': 0.05}	14	0.0123901	0.158508	0.99986	key	key|target	0.74	TRUE	TRUE	TRUE	target	{'provided': 0.74}
Factual Knowledge	country_capital	Guinea is to Conakry as Norway is to	oslo	?	0.16	0	{'?': 0.12, ':': 0.06, 'what': 0.05}	14	0.0145264	0.141724	0.99986	key	key|target	0.74	TRUE	TRUE	TRUE	target	{'oslo': 0.74}
Semantic Relations	animal_shelter	crocodile is to river as gorilla is to	grove	jungle	0.16	0	{'jungle': 0.16, '': 0.06, 'what': 0.06, '?': 0.05}	5106	1.16974e-06	0.160155	0.949119	key	key|target	0.74	TRUE	TRUE	TRUE	target	{'grove': 0.74}
Semantic Relations	antonyms_binary	on is to off as southwest is to	southeast		0.15	0	{'': 0.05, '?': 0.11, 'a': 0.03}	37	0.00350952	0.145905	0.999631	key	key|target	0.74	TRUE	TRUE	TRUE	target	{'southeast': 0.74}
Factual Knowledge	UK_city_county	wolverhampton is to midlands as worcester is to	worcestershire	mid	0.14	0	{'mid': 0.14, 'west': 0.08, 'what': 0.05, '______': 0.03, '': 0.03}	6	0.0258789	0.11377	0.99994	key	key|target	0.74	TRUE	TRUE	TRUE	target	{'worcestershire': 0.74}
Factual Knowledge	UK_city_county	cardiff is to glamorgan as glasgow is to	lowlands	sc	0.14	0	{'sc': 0.14, '__': 0.06, '______': 0.04, '____': 0.04, '': 0.03}	62	0.00182343	0.134895	0.999382	key	key|target	0.74	TRUE	TRUE	TRUE	target	{'lowlands': 0.74}
Verbal & Grammatical Forms	noun_plural_reg	villages is to village as weeks is to	week	year	0.14	0	{'year': 0.14, 'month': 0.06, '?': 0.05, '______': 0.04, 'months': 0.04}	29	0.00674438	0.137787	0.999711	key	key|target	0.74	TRUE	TRUE	TRUE	target	{'week': 0.74}
Factual Knowledge	capital_world	Qatar is to Doha as Spain is to	madrid	?	0.13	0	{'?': 0.08, 'what': 0.12, ':': 0.07}	6	0.0478516	0.0859375	0.99994	key	key|target	0.74	TRUE	TRUE	TRUE	target	{'madrid': 0.74}
Semantic Hierarchies	hypernyms_misc	necklace is to jewelry as perfume is to	toiletry	fragrance	0.13	0	{'fragrance': 0.13, '______': 0.07, '': 0.07, 'perfume': 0.05, 'what': 0.04}	22	0.0103149	0.123474	0.999781	key	key|target	0.74	TRUE	TRUE	TRUE	target	{'toiletry': 0.74}
Semantic Hierarchies	hypernyms_misc	bracelet is to jewelry as sidewalk is to	walk	road	0.13	0	{'road': 0.13, 'pavement': 0.07, 'street': 0.06, 'concrete': 0.05, 'cement': 0.04}	12	0.0169678	0.116821	0.99988	key	key|target	0.74	TRUE	TRUE	TRUE	target	{'walk': 0.74}
Factual Knowledge	UK_city_county	cardiff is to glamorgan as leicester is to	midlands	le	0.12	0	{'le': 0.12, '-': 0.1, 'not': 0.08, 'lin': 0.04, 'what': 0.04}	11627	2.07685e-07	0.124023	0.884138	key	key|target	0.74	TRUE	TRUE	TRUE	target	{'midlands': 0.74}
Factual Knowledge	UK_city_county	brighton is to sussex as leicester is to	midlands	le	0.12	0	{'le': 0.12, '______': 0.08, 'what': 0.06, '_____': 0.05, 'not': 0.05}	2389	3.63588e-06	0.124508	0.976194	key	key|target	0.74	TRUE	TRUE	TRUE	target	{'midlands': 0.74}
Semantic Hierarchies	hypernyms_misc	pad is to notepad as brush is to	toothbrush	?	0.12	0	{'?': 0.06, 'paint': 0.11, '': 0.04}	75	0.00111389	0.123398	0.999253	key	key|target	0.74	TRUE	TRUE	TRUE	target	{'toothbrush': 0.74}
Semantic Relations	animal_sound	howl is to fox as grunt is to	gorilla	pig	0.12	0	{'pig': 0.12, 'hog': 0.07, '': 0.06, '?': 0.06}	54	0.00154877	0.114174	0.999462	key	key|target	0.74	TRUE	TRUE	TRUE	target	{'gorilla': 0.74}
Semantic Relations	animal_sound	elk is to bellow as sheep is to	baa	______	0.12	0	{'______': 0.12, '_____': 0.09, '____': 0.07, '___': 0.07, '': 0.06}	145	0.00044632	0.119671	0.998555	key	key|target	0.74	TRUE	TRUE	TRUE	target	{'baa': 0.74}
Semantic Relations	male_female	lion is to lioness as ram is to	ewe	?	0.12	0	{'?': 0.06, '': 0.06, '____': 0.06}	454	3.40939e-05	0.123013	0.995476	key	key|target	0.74	TRUE	TRUE	TRUE	target	{'ewe': 0.74}
Factual Knowledge	country_capital	Nigeria is to Abuja as Norway is to	oslo	?	0.11	0	{'?': 0.07, 'what': 0.09, '______': 0.06, ':': 0.04}	5	0.0407715	0.0666504	0.99995	key	key|target	0.74	TRUE	TRUE	TRUE	target	{'oslo': 0.74}
Morphological Modifiers	verb+able_reg	consider is to considerable as predict is to	predictable	?	0.11	0	{'?': 0.11, '': 0.05, '______': 0.07, ':': 0.06}	7	0.027832	0.0820312	0.99993	key	key|target	0.74	TRUE	TRUE	TRUE	target	{'predictable': 0.74}
Morphological Modifiers	over+adj_reg	strained is to overstrained as zealous is to	overzealous		0.11	0	{'': 0.06, '______': 0.07, '?': 0.04, ':': 0.03}	40	0.00309753	0.105789	0.999601	key	key|target	0.74	TRUE	TRUE	TRUE	target	{'overzealous': 0.74}
Semantic Hierarchies	hypernyms_misc	croissant is to pastry as hairnet is to	net	?	0.11	0	{'?': 0.11, 'what': 0.06, '': 0.05, '____': 0.04, ':': 0.04}	5771	1.13249e-06	0.105468	0.942492	key	key|target	0.74	TRUE	TRUE	TRUE	target	{'net': 0.74}
Semantic Hierarchies	hypernyms_misc	dessert is to cake as fabric is to	denim	what	0.11	0	{'what': 0.11, '______': 0.07, '____': 0.05, '"': 0.05, '_____': 0.03}	552	5.29289e-05	0.106392	0.994499	key	key|target	0.74	TRUE	TRUE	TRUE	target	{'denim': 0.74}
Semantic Relations	animal_shelter	chinchilla is to nest as seal is to	den		0.11	0	{'': 0.05, '______': 0.05, '_____': 0.04, '__': 0.03}	64	0.0020752	0.104858	0.999362	key	key|target	0.74	TRUE	TRUE	TRUE	target	{'den': 0.74}
Semantic Relations	male_female	superman is to superwoman as valet is to	maid	"	0.11	0	{'"': 0.04, 'what': 0.07, 'va': 0.05, '______': 0.03}	36	0.00518799	0.105652	0.999641	key	key|target	0.74	TRUE	TRUE	TRUE	target	{'maid': 0.74}
Factual Knowledge	capital_world	Samoa is to Apia as Eritrea is to	asmara	?	0.1	0	{'?': 0.06, '': 0.07, '?"': 0.06, '__': 0.05}	6	0.0390625	0.0634766	0.99994	key	key|target	0.74	TRUE	TRUE	TRUE	target	{'asmara': 0.74}
Morphological Modifiers	verb+able_reg	afford is to affordable as understand is to	understandable	______	0.1	0	{'______': 0.1, 'understanding': 0.07, '__': 0.05, '': 0.03}	9	0.0189209	0.0836182	0.99991	key	key|target	0.74	TRUE	TRUE	TRUE	target	{'understandable': 0.74}
Semantic Relations	antonyms_binary	dynamic is to static as employ is to	dismiss	______	0.1	0	{'______': 0.1, '_____': 0.06, 'employee': 0.05, '____': 0.04, 'worker': 0.03}	202	0.000371933	0.102655	0.997987	key	key|target	0.74	TRUE	TRUE	TRUE	target	{'dismiss': 0.74}
Verbal & Grammatical Forms	past_tense	fed is to feeding as spent is to	spending	______	0.1	0	{'______': 0.1, '__': 0.07, '____': 0.05, 'mining': 0.04, '_____': 0.03}	12	0.0159912	0.088501	0.99988	key	key|target	0.74	TRUE	TRUE	TRUE	target	{'spending': 0.74}
Factual Knowledge	UK_city_county	birmingham is to midlands as oxford is to	oxfordshire	south	0.09	0	{'south': 0.09, '______': 0.07, 'what': 0.04, '____': 0.03}	31	0.00714111	0.0797729	0.999691	key	key|target	0.74	TRUE	TRUE	TRUE	target	{'oxfordshire': 0.74}
Factual Knowledge	capital_world	Sweden is to Stockholm as Estonia is to	tallinn	?	0.09	0	{'?': 0.09, ':': 0.07, 'what': 0.07, '______': 0.06}	5	0.0424805	0.0478516	0.99995	key	key|target	0.74	TRUE	TRUE	TRUE	target	{'tallinn': 0.74}
Morphological Modifiers	verb+able_reg	afford is to affordable as inflate is to	inflatable	______	0.09	0	{'______': 0.09, 'def': 0.09, '__': 0.06, '': 0.03, '?': 0.03}	95	0.00120544	0.091568	0.999053	key	key|target	0.74	TRUE	TRUE	TRUE	target	{'inflatable': 0.74}
Morphological Modifiers	verb+er_irreg	eater is to eat as organiser is to	organise	?	0.09	0	{'?': 0.03, '': 0.03}	8	0.0230713	0.067749	0.99992	key	key|target	0.74	TRUE	TRUE	TRUE	target	{'organise': 0.74}
Semantic Relations	animal_sound	bellow is to deer as chirrup is to	songbird		0.09	0	{'': 0.08, '______': 0.06, ':': 0.04, '_____': 0.04}	159	0.00062561	0.0897064	0.998416	key	key|target	0.74	TRUE	TRUE	TRUE	target	{'songbird': 0.74}
Semantic Relations	animal_shelter	tiger is to den as trout is to	river		0.09	0	{'': 0.05, '?': 0.09, '_____': 0.06, ':': 0.04}	11	0.0229492	0.0708008	0.99989	key	key|target	0.74	TRUE	TRUE	TRUE	target	{'river': 0.74}
Semantic Relations	animal_shelter	ant is to anthill as dog is to	doghouse	?	0.09	0	{'?': 0.09, 'bone': 0.05, '_____': 0.05, 'kenn': 0.04, '': 0.04}	8	0.029541	0.0612793	0.99992	key	key|target	0.74	TRUE	TRUE	TRUE	target	{'doghouse': 0.74}
Semantic Relations	animal_shelter	ant is to anthill as chimpanzee is to	grove	?	0.09	0	{'?': 0.05, 'what': 0.08, '': 0.05}	8233	7.78586e-07	0.089843	0.917959	key	key|target	0.74	TRUE	TRUE	TRUE	target	{'grove': 0.74}
Semantic Relations	antonyms_gradable	cooked is to raw as energetic is to	lethargic	?	0.09	0	{'?': 0.05, '': 0.04, 'lazy': 0.04}	23	0.00872803	0.0796509	0.999771	key	key|target	0.74	TRUE	TRUE	TRUE	target	{'lethargic': 0.74}
Morphological Modifiers	verb+ment_irreg	disappoint is to disappointment as reimburse is to	reimbursement	______	0.08	0	{'______': 0.08, '?': 0.06, '__': 0.05, 'what': 0.05, '____': 0.05}	5	0.0488281	0.0268555	0.99995	key	key|target	0.74	TRUE	TRUE	TRUE	target	{'reimbursement': 0.74}
Morphological Modifiers	over+adj_reg	booked is to overbooked as qualified is to	overqualified	:	0.08	0	{':': 0.08, '______': 0.07, '?': 0.07, '': 0.07, 'un': 0.05}	31	0.00408936	0.0779419	0.999691	key	key|target	0.74	TRUE	TRUE	TRUE	target	{'overqualified': 0.74}
Semantic Hierarchies	hypernyms_misc	plum is to fruit as tub is to	container	______	0.08	0	{'______': 0.08, '_____': 0.06, 'water': 0.05, '____': 0.04, '__': 0.04}	218	0.000247955	0.077877	0.997828	key	key|target	0.74	TRUE	TRUE	TRUE	target	{'container': 0.74}
Semantic Relations	animal_shelter	chimpanzee is to grove as termite is to	hill	_____	0.08	0	{'_____': 0.08, '______': 0.08, '': 0.05, '__': 0.04}	12	0.0167236	0.0682373	0.99988	key	key|target	0.74	TRUE	TRUE	TRUE	target	{'hill': 0.74}
Semantic Relations	antonyms_binary	behind is to ahead as subsequently is to	previously		0.08	0	{'': 0.07, '______': 0.06, '__': 0.04, '_____': 0.03}	7	0.0239258	0.0595703	0.99993	key	key|target	0.74	TRUE	TRUE	TRUE	target	{'previously': 0.74}
Verbal & Grammatical Forms	plural	elephants is to elephant as women is to	woman	______	0.08	0	{'______': 0.08, '____': 0.06, 'what': 0.05, '_____': 0.05, 'women': 0.04}	10	0.0273438	0.0517578	0.9999	key	key|target	0.74	TRUE	TRUE	TRUE	target	{'woman': 0.74}
Semantic Relations	antonyms_gradable	flat is to lumpy as tasteless is to	tasty	"	0.07	0	{'"': 0.07, '______': 0.05, '': 0.04, 'what': 0.04, 'spicy': 0.03}	10	0.0250244	0.043335	0.9999	key	key|target	0.74	TRUE	TRUE	TRUE	target	{'tasty': 0.74}
Semantic Relations	antonyms_gradable	empty is to full as flat is to	lumpy	what	0.07	0	{'what': 0.07, 'full': 0.07, '?': 0.06, '': 0.05, 'round': 0.05}	1065	2.55108e-05	0.0712636	0.989387	key	key|target	0.74	TRUE	TRUE	TRUE	target	{'lumpy': 0.74}
Semantic Relations	antonyms_gradable	uninteresting is to interesting as flat is to	lumpy	curved	0.07	0	{'curved': 0.07, 'cur': 0.07, 'b': 0.05, 'what': 0.05, '______': 0.04}	625	5.81741e-05	0.0746489	0.993772	key	key|target	0.74	TRUE	TRUE	TRUE	target	{'lumpy': 0.74}
Semantic Relations	antonyms_gradable	bright is to pale as tasty is to	tasteless	______	0.07	0	{'______': 0.07, '': 0.04, '?': 0.04, '__': 0.03}	86	0.00176239	0.0709915	0.999143	key	key|target	0.74	TRUE	TRUE	TRUE	target	{'tasteless': 0.74}
Semantic Relations	male_female	fisherwoman is to fisherman as tigress is to	tiger	what	0.07	0	{'what': 0.07, '': 0.06, '?': 0.06, '______': 0.06}	13	0.0247803	0.0489502	0.99987	key	key|target	0.74	TRUE	TRUE	TRUE	target	{'tiger': 0.74}
Verbal & Grammatical Forms	noun_plural_irreg	energies is to energy as families is to	family	people	0.07	0	{'people': 0.07, '______': 0.07, 'relatives': 0.04, 'parents': 0.03, '?': 0.03}	13	0.0186768	0.0506592	0.99987	key	key|target	0.74	TRUE	TRUE	TRUE	target	{'family': 0.74}
Factual Knowledge	name_occupation	lincoln is to president as maxwell is to	physicist	''	0.06	0	{"''": 0.06, '"': 0.03, '__': 0.03, '': 0.03, 'general': 0.03}	179	0.00056839	0.0572929	0.998216	key	key|target	0.74	TRUE	TRUE	TRUE	target	{'physicist': 0.74}
Morphological Modifiers	verb+tion_irreg	computation is to compute as customization is to	customize	design	0.06	0	{'design': 0.06, 'programming': 0.05, 'configure': 0.03, 'use': 0.02, '': 0.02}	24	0.00747681	0.047699	0.999761	key	key|target	0.74	TRUE	TRUE	TRUE	target	{'customize': 0.74}
Morphological Modifiers	superlative	fast is to fastest as tasty is to	tastiest	______	0.06	0	{'______': 0.06, '?': 0.05, ':': 0.04, '': 0.04, '"': 0.04}	19	0.0126953	0.0517578	0.999811	key	key|target	0.74	TRUE	TRUE	TRUE	target	{'tastiest': 0.74}
Semantic Hierarchies	hypernyms_misc	jewelry is to necklace as jar is to	vase	what	0.06	0	{'what': 0.06, '': 0.06, '?': 0.05, 'jar': 0.04, ':': 0.04}	107	0.000816345	0.0641251	0.998934	key	key|target	0.74	TRUE	TRUE	TRUE	target	{'vase': 0.74}
Verbal & Grammatical Forms	noun_plural_irreg	series is to series as technology is to	technologies	science	0.09	0	{'science': 0.09, 'technology': 0.06, '__': 0.05, '______': 0.05, 'the': 0.02}	106	0.00114441	0.0901642	0.998944	example_value	example_value|target	0.74	TRUE	TRUE	TRUE	target	{'technologies': 0.74}
Morphological Modifiers	re+verb_reg	appear is to reappear as occur is to	reoccur	occur	0.83	0	{'occur': 0.83, 'occurrence': 0.02, 'recur': 0.02, 'occ': 0.02, '______': 0.01}	52	0.000415802	0.827709	0.999482	key	key|target	0.73	TRUE	TRUE	TRUE	target	{'reoccur': 0.73}
Morphological Modifiers	re+verb_reg	apply is to reapply as distribute is to	redistribute	distribute	0.69	0	{'distribute': 0.69, 'distribution': 0.03, 'distrib': 0.02, 'distributing': 0.02, 'dis': 0.02}	8	0.00561523	0.685791	0.99992	key	key|target	0.73	TRUE	TRUE	TRUE	target	{'redistribute': 0.73}
Morphological Modifiers	re+verb_reg	connect is to reconnect as emerge is to	reemerge	emerge	0.61	0	{'emerge': 0.61, 'merge': 0.05, 'em': 0.03, 'emerging': 0.03, 'build': 0.02}	19	0.00178528	0.611496	0.999811	key	key|target	0.73	TRUE	TRUE	TRUE	target	{'reemerge': 0.73}
Factual Knowledge	UK_city_county	cambridge is to cambridgeshire as leicester is to	midlands	le	0.6	0	{'le': 0.6, '?': 0.02, '______': 0.02, 'what': 0.02, '': 0.02}	19254	4.37722e-08	0.601562	0.808135	key	key|target	0.73	TRUE	TRUE	TRUE	target	{'midlands': 0.73}
Morphological Modifiers	re+verb_reg	evaluate is to reevaluate as examine is to	reexamine	examine	0.56	0	{'examine': 0.56, 'scrutin': 0.06, 'inspect': 0.03, 'examination': 0.03, 'exam': 0.03}	8	0.0102539	0.54834	0.99992	key	key|target	0.73	TRUE	TRUE	TRUE	target	{'reexamine': 0.73}
Semantic Relations	animal_sound	dog is to bark as wasp is to	buzz	sting	0.56	0	{'sting': 0.56, '______': 0.04, '__': 0.03, '_____': 0.02, 'what': 0.02}	14	0.00747681	0.551117	0.99986	key	key|target	0.73	TRUE	TRUE	TRUE	target	{'buzz': 0.73}
Morphological Modifiers	re+verb_reg	appear is to reappear as develop is to	redevelop	develop	0.49	0	{'develop': 0.49, 'evolve': 0.05, 'development': 0.03, '': 0.03, 'grow': 0.02}	38	0.00193024	0.484398	0.999621	key	key|target	0.73	TRUE	TRUE	TRUE	target	{'redevelop': 0.73}
Semantic Relations	male_female	granddaughter is to grandson as bitch is to	hound	dog	0.48	0	{'dog': 0.48, 'son': 0.07, 'what': 0.05, '______': 0.02, '____': 0.02}	1325	7.18236e-06	0.482415	0.986796	key	key|target	0.73	TRUE	TRUE	TRUE	target	{'hound': 0.73}
Semantic Hierarchies	hypernyms_misc	journal is to diary as trousers is to	jeans	pant	0.46	0	{'pant': 0.46, 'pants': 0.07, '______': 0.03, '____': 0.03, '...': 0.03}	20	0.00427246	0.458618	0.999801	key	key|target	0.73	TRUE	TRUE	TRUE	target	{'jeans': 0.73}
Morphological Modifiers	re+verb_reg	evaluate is to reevaluate as grow is to	regrow	grow	0.45	0	{'grow': 0.45, 'shrink': 0.04, '______': 0.03, '': 0.02, '__': 0.02}	40	0.00202942	0.451096	0.999601	key	key|target	0.73	TRUE	TRUE	TRUE	target	{'regrow': 0.73}
Semantic Relations	male_female	fisherwoman is to fisherman as niece is to	nephew	uncle	0.42	0	{'uncle': 0.42, 'what': 0.07, '?': 0.06, ':': 0.05, '...': 0.04}	7	0.0211182	0.40271	0.99993	key	key|target	0.73	TRUE	TRUE	TRUE	target	{'nephew': 0.73}
Semantic Relations	family	her is to his as grandma is to	grandpa	his	0.41	0	{'his': 0.41, 'her': 0.25, 'him': 0.08, 'grandma': 0.02, 'grandmother': 0.02}	5	0.019043	0.38916	0.99995	key	key|target	0.73	TRUE	TRUE	TRUE	target	{'grandpa': 0.73}
Morphological Modifiers	adj+ly_reg	physical is to physically as virtual is to	virtually	real	0.35	0	{'real': 0.35, 'actual': 0.19, 'physically': 0.08, 'actually': 0.06, 'really': 0.03}	5	0.0220947	0.323608	0.99995	key	key|target	0.73	TRUE	TRUE	TRUE	target	{'virtually': 0.73}
Morphological Modifiers	re+verb_reg	generate is to regenerate as upload is to	reupload	download	0.32	0	{'download': 0.32, 'upload': 0.13, 'up': 0.09, 'down': 0.06, 'reload': 0.02}	6	0.015625	0.308594	0.99994	key	key|target	0.73	TRUE	TRUE	TRUE	target	{'reupload': 0.73}
Morphological Modifiers	re+verb_reg	define is to redefine as learn is to	relearn	learn	0.32	0	{'learn': 0.32, 'un': 0.16, 'teach': 0.06, 'know': 0.05, 'be': 0.02}	7	0.0196533	0.296753	0.99993	key	key|target	0.73	TRUE	TRUE	TRUE	target	{'relearn': 0.73}
Morphological Modifiers	over+adj_reg	heard is to overheard as inflated is to	overinflated	inflated	0.3	0	{'inflated': 0.3, '______': 0.07, '__': 0.06, 'def': 0.05, 'inflate': 0.04}	12	0.0117798	0.290955	0.99988	key	key|target	0.73	TRUE	TRUE	TRUE	target	{'overinflated': 0.73}
Morphological Modifiers	re+verb_reg	appear is to reappear as integrate is to	reintegrate	integrate	0.27	0	{'integrate': 0.27, 'dis': 0.15, 'integrated': 0.03, 'separate': 0.02, '': 0.02}	10	0.0133057	0.254272	0.9999	key	key|target	0.73	TRUE	TRUE	TRUE	target	{'reintegrate': 0.73}
Morphological Modifiers	over+adj_reg	heard is to overheard as qualified is to	overqualified	qualified	0.26	0	{'qualified': 0.26, '______': 0.1, '__': 0.06, '____': 0.03, 'qualify': 0.03}	19	0.00686646	0.250946	0.999811	key	key|target	0.73	TRUE	TRUE	TRUE	target	{'overqualified': 0.73}
Morphological Modifiers	re+verb_reg	establish is to reestablish as occur is to	reoccur	happen	0.26	0	{'happen': 0.26, 'occur': 0.22, 'take': 0.14, 'come': 0.12, 'be': 0.06}	33	0.00112152	0.260597	0.999671	key	key|target	0.73	TRUE	TRUE	TRUE	target	{'reoccur': 0.73}
Morphological Modifiers	re+verb_reg	connect is to reconnect as integrate is to	reintegrate	integrate	0.25	0	{'integrate': 0.25, 'dis': 0.06, '__': 0.04, '______': 0.03, 'integration': 0.02}	7	0.0148315	0.232239	0.99993	key	key|target	0.73	TRUE	TRUE	TRUE	target	{'reintegrate': 0.73}
Factual Knowledge	name_occupation	dante is to poet as darwin is to	naturalist	scientist	0.24	0	{'scientist': 0.24, 'biologist': 0.15, '?': 0.04, '': 0.03, 'what': 0.02}	8	0.0172119	0.221069	0.99992	key	key|target	0.73	TRUE	TRUE	TRUE	target	{'naturalist': 0.73}
Factual Knowledge	name_nationality	leibniz is to German as lennon is to	english	beat	0.21	0	{'beat': 0.21, 'len': 0.14, 'the': 0.08, 'mcc': 0.06, 'john': 0.04}	10	0.0127563	0.199158	0.9999	key	key|target	0.73	TRUE	TRUE	TRUE	target	{'english': 0.73}
Morphological Modifiers	re+verb_reg	decorate is to redecorate as tell is to	retell	tell	0.21	0	{'tell': 0.21, 'talk': 0.09, 'say': 0.06, 'narr': 0.04, 'speak': 0.04}	14	0.0090332	0.202881	0.99986	key	key|target	0.73	TRUE	TRUE	TRUE	target	{'retell': 0.73}
Semantic Hierarchies	hyponyms_misc	teacup is to cup as jeans is to	trousers	pant	0.21	0	{'pant': 0.21, 'pants': 0.06, 'what': 0.05, '______': 0.04, ':': 0.03}	14	0.0136108	0.19928	0.99986	key	key|target	0.73	TRUE	TRUE	TRUE	target	{'trousers': 0.73}
Semantic Relations	male_female	stepfather is to stepmother as tiger is to	tigress	lion	0.21	0	{'lion': 0.21, 'tiger': 0.08, 'what': 0.08, '______': 0.05, '"': 0.03}	308	0.000177383	0.206854	0.996931	key	key|target	0.73	TRUE	TRUE	TRUE	target	{'tigress': 0.73}
Factual Knowledge	UK_city_county	cambridge is to cambridgeshire as dundee is to	lowlands	d	0.2	0	{'d': 0.2, '__': 0.06, 'what': 0.06, 'dun': 0.04, '?': 0.04}	111	0.000469208	0.194843	0.998894	key	key|target	0.73	TRUE	TRUE	TRUE	target	{'lowlands': 0.73}
Morphological Modifiers	over+adj_reg	booked is to overbooked as simplified is to	oversimplified	simplified	0.19	0	{'simplified': 0.19, 'complex': 0.15, 'complicated': 0.14, '______': 0.06, 'what': 0.03}	7	0.0252686	0.162231	0.99993	key	key|target	0.73	TRUE	TRUE	TRUE	target	{'oversimplified': 0.73}
Verbal & Grammatical Forms	noun_plural_reg	government is to governments as science is to	sciences	scientists	0.18	0	{'scientists': 0.18, 'religion': 0.07, 'the': 0.07, 'nature': 0.07, 'technology': 0.06}	40	0.00283813	0.177826	0.999601	key	key|target	0.73	TRUE	TRUE	TRUE	target	{'sciences': 0.73}
Factual Knowledge	UK_city_county	derby is to derbyshire as newport is to	gwent	glam	0.16	0	{'glam': 0.16, 'new': 0.1, 'w': 0.09, 'som': 0.08, 'which': 0.08}	289	6.4373e-05	0.160092	0.99712	key	key|target	0.73	TRUE	TRUE	TRUE	target	{'gwent': 0.73}
Morphological Modifiers	verb+able_reg	consider is to considerable as survive is to	survivable	?	0.16	0	{'?': 0.08, '______': 0.06, '': 0.04}	11	0.0162354	0.147827	0.99989	key	key|target	0.73	TRUE	TRUE	TRUE	target	{'survivable': 0.73}
Semantic Relations	antonyms_gradable	decisive is to hesitating as organized is to	unorganized	dis	0.16	0	{'dis': 0.16, '______': 0.05, '': 0.04, 'confused': 0.04, '__': 0.03}	5	0.0310059	0.126221	0.99995	key	key|target	0.73	TRUE	TRUE	TRUE	target	{'unorganized': 0.73}
Factual Knowledge	country_capital	Bangladesh is to Dhaka as Georgia is to	tbilisi	Atlanta	0.15	0	{'Atlanta': 0.15, '?': 0.06, ':': 0.07}	119	0.000320435	0.153	0.998814	key	key|target	0.73	TRUE	TRUE	TRUE	target	{'tbilisi': 0.73}
Semantic Relations	antonyms_binary	end is to beginning as outbound is to	inbound	?	0.15	0	{'?': 0.15, '': 0.04, ':': 0.09}	16	0.0131226	0.137268	0.999841	key	key|target	0.73	TRUE	TRUE	TRUE	target	{'inbound': 0.73}
Morphological Modifiers	over+adj_reg	overambitious is to ambitious as oversized is to	sized	:	0.14	0	{':': 0.05, '': 0.05}	49	0.00320435	0.137421	0.999512	key	key|target	0.73	TRUE	TRUE	TRUE	target	{'sized': 0.73}
Semantic Hierarchies	hypernyms_misc	sofa is to furniture as tub is to	container	?	0.14	0	{'?': 0.03, 'bathroom': 0.09, '': 0.08, '?"': 0.05}	181	0.000253677	0.139395	0.998196	key	key|target	0.73	TRUE	TRUE	TRUE	target	{'container': 0.73}
Morphological Modifiers	adj+ness_reg	carefulness is to careful as weakness is to	weak	strong	0.13	0	{'strong': 0.13, '______': 0.06, '': 0.04, '"': 0.04, ':': 0.04}	18	0.0117798	0.122986	0.999821	key	key|target	0.73	TRUE	TRUE	TRUE	target	{'weak': 0.73}
Morphological Modifiers	over+adj_reg	compensated is to overcompensated as stocked is to	overstocked	______	0.13	0	{'______': 0.13, 'depleted': 0.07, '?': 0.04, '__': 0.04, '': 0.03}	5	0.0339355	0.092041	0.99995	key	key|target	0.73	TRUE	TRUE	TRUE	target	{'overstocked': 0.73}
Morphological Modifiers	over+adj_reg	subscribed is to oversubscribed as written is to	overwritten	______	0.13	0	{'______': 0.13, 'written': 0.05, '__': 0.05, 'rewritten': 0.04, '_____': 0.04}	50	0.00296021	0.130829	0.999502	key	key|target	0.73	TRUE	TRUE	TRUE	target	{'overwritten': 0.73}
Semantic Hierarchies	hypernyms_misc	fridge is to appliance as vase is to	jar		0.13	0	{'': 0.04, '?': 0.03, ':': 0.03}	309	0.000100613	0.128806	0.996921	key	key|target	0.73	TRUE	TRUE	TRUE	target	{'jar': 0.73}
Semantic Hierarchies	hypernyms_misc	computer is to device as sidewalk is to	walk	road	0.13	0	{'road': 0.13, 'street': 0.07, 'city': 0.07, 'park': 0.05, 'pavement': 0.04}	10	0.0158691	0.11792	0.9999	key	key|target	0.73	TRUE	TRUE	TRUE	target	{'walk': 0.73}
Semantic Hierarchies	hypernyms_misc	brooch is to jewelry as tv is to	device	entertainment	0.13	0	{'entertainment': 0.13, 'electronics': 0.07, 'tv': 0.05, 'television': 0.05, 'movies': 0.04}	309	0.000199318	0.131637	0.996921	key	key|target	0.73	TRUE	TRUE	TRUE	target	{'device': 0.73}
Verbal & Grammatical Forms	verb_Ving_Ved	attended is to attending as received is to	receiving	received	0.13	0	{'received': 0.13, '______': 0.1, '_____': 0.06, '__': 0.06, '____': 0.04}	18	0.00744629	0.12439	0.999821	key	key|target	0.73	TRUE	TRUE	TRUE	target	{'receiving': 0.73}
Verbal & Grammatical Forms	verb_Ving_Ved	attended is to attending as taught is to	teaching	______	0.13	0	{'______': 0.13, 'taught': 0.13, '__': 0.13, '_____': 0.07, '____': 0.07}	5	0.0612793	0.0686035	0.99995	key	key|target	0.73	TRUE	TRUE	TRUE	target	{'teaching': 0.73}
Morphological Modifiers	verb+tion_irreg	consulation is to consult as perspiration is to	perspire	labor	0.12	0	{'labor': 0.12, 'sweat': 0.12, 'work': 0.1, 'labour': 0.09, 'exercise': 0.06}	7	0.0308838	0.0911865	0.99993	key	key|target	0.73	TRUE	TRUE	TRUE	target	{'perspire': 0.73}
Semantic Relations	family	groom is to bride as nephew is to	niece	aunt	0.12	0	{'aunt': 0.12, 'uncle': 0.11, 'what': 0.07, '______': 0.06, 'whom': 0.04}	10	0.0234375	0.0996094	0.9999	key	key|target	0.73	TRUE	TRUE	TRUE	target	{'niece': 0.73}
Semantic Relations	male_female	groom is to bride as nephew is to	niece	aunt	0.12	0	{'aunt': 0.12, 'uncle': 0.11, 'what': 0.07, '______': 0.06, 'whom': 0.04}	10	0.0234375	0.0996094	0.9999	key	key|target	0.73	TRUE	TRUE	TRUE	target	{'niece': 0.73}
Factual Knowledge	UK_city_county	birmingham is to midlands as worcester is to	worcestershire	west	0.11	0	{'west': 0.11, '______': 0.04, 'mid': 0.04, "''": 0.04, 'what': 0.03}	5	0.0341797	0.0776367	0.99995	key	key|target	0.73	TRUE	TRUE	TRUE	target	{'worcestershire': 0.73}
Factual Knowledge	capital_world	Afghanistan is to Kabul as Egypt is to	cairo	:	0.11	0	{':': 0.1, '?': 0.08, 'what': 0.05, '': 0.05}	15	0.0142212	0.0975952	0.999851	key	key|target	0.73	TRUE	TRUE	TRUE	target	{'cairo': 0.73}
Factual Knowledge	capital_world	Guyana is to Georgetown as Nicaragua is to	managua		0.11	0	{'': 0.11, '______': 0.07, '?': 0.07, ':': 0.05, '_____': 0.05}	11	0.02771	0.0782471	0.99989	key	key|target	0.73	TRUE	TRUE	TRUE	target	{'managua': 0.73}
Morphological Modifiers	re+verb_reg	assure is to reassure as submit is to	resubmit	submit	0.11	0	{'submit': 0.11, '______': 0.07, '__': 0.07, '?': 0.05}	12	0.0150757	0.0996704	0.99988	key	key|target	0.73	TRUE	TRUE	TRUE	target	{'resubmit': 0.73}
Semantic Hierarchies	hypernyms_misc	book is to notebook as walk is to	sidewalk	run	0.11	0	{'run': 0.11, '?': 0.05, '': 0.04, 'walk': 0.03, 'a': 0.03}	154	0.000450134	0.109901	0.998465	key	key|target	0.73	TRUE	TRUE	TRUE	target	{'sidewalk': 0.73}
Semantic Hierarchies	hypernyms_misc	appliance is to fridge as net is to	hairnet	internet	0.11	0	{'internet': 0.11, 'what': 0.07, 'web': 0.05, '______': 0.04, 'computer': 0.03}	145	0.000598907	0.110241	0.998555	key	key|target	0.73	TRUE	TRUE	TRUE	target	{'hairnet': 0.73}
Semantic Relations	animal_shelter	cattle is to barn as chimpanzee is to	grove		0.11	0	{'': 0.06, 'what': 0.09, '?': 0.06, 'tree': 0.05}	6598	8.3074e-07	0.111327	0.934251	key	key|target	0.73	TRUE	TRUE	TRUE	target	{'grove': 0.73}
Semantic Relations	animal_sound	mule is to bray as sheep is to	baa	______	0.11	0	{'______': 0.11, '_____': 0.11, 'ble': 0.06, '___': 0.06, '____': 0.06}	109	0.000762939	0.1091	0.998914	key	key|target	0.73	TRUE	TRUE	TRUE	target	{'baa': 0.73}
Semantic Relations	antonyms_binary	out is to in as subsequently is to	previously		0.11	0	{'': 0.04, 'a': 0.04, 'subsequently': 0.02}	5	0.0194092	0.0924072	0.99995	key	key|target	0.73	TRUE	TRUE	TRUE	target	{'previously': 0.73}
Verbal & Grammatical Forms	noun_plural_irreg	industry is to industries as memory is to	memories	the	0.11	0	{'the': 0.11, 'computers': 0.04, '': 0.04, 'intelligence': 0.04, 'mind': 0.03}	77	0.00170135	0.110603	0.999233	key	key|target	0.73	TRUE	TRUE	TRUE	target	{'memories': 0.73}
Verbal & Grammatical Forms	verb_Ving_Ved	attended is to attending as improved is to	improving	______	0.11	0	{'______': 0.11, '__': 0.06, 'improved': 0.05, '_____': 0.05, '____': 0.04}	11	0.0153198	0.0911255	0.99989	key	key|target	0.73	TRUE	TRUE	TRUE	target	{'improving': 0.73}
Factual Knowledge	capital_world	Venezuela is to Caracas as Nicaragua is to	managua	:	0.1	0	{':': 0.05, '______': 0.06, '': 0.06, '__': 0.05}	8	0.032959	0.0627441	0.99992	key	key|target	0.73	TRUE	TRUE	TRUE	target	{'managua': 0.73}
Morphological Modifiers	over+adj_reg	overpopulated is to populated as overzealous is to	zealous		0.1	0	{'': 0.08, ':': 0.07, '"': 0.05, '?': 0.04}	7	0.0301514	0.0689697	0.99993	key	key|target	0.73	TRUE	TRUE	TRUE	target	{'zealous': 0.73}
Morphological Modifiers	un+adj_reg	authorized is to unauthorized as aware is to	unaware		0.1	0	{'': 0.05, '?': 0.09, '______': 0.07, '_____': 0.04}	9	0.0249023	0.0795898	0.99991	key	key|target	0.73	TRUE	TRUE	TRUE	target	{'unaware': 0.73}
Semantic Hierarchies	hypernyms_misc	dress is to clothes as tub is to	container	bath	0.1	0	{'bath': 0.1, '?': 0.07, 'water': 0.07, '': 0.04, '__': 0.04}	178	0.000293732	0.0983391	0.998226	key	key|target	0.73	TRUE	TRUE	TRUE	target	{'container': 0.73}
Semantic Hierarchies	hypernyms_misc	toiletry is to perfume as jar is to	vase		0.1	0	{'': 0.1, '?': 0.08, ':': 0.07, 'what': 0.04, '______': 0.04}	191	0.000238419	0.103765	0.998097	key	key|target	0.73	TRUE	TRUE	TRUE	target	{'vase': 0.73}
Semantic Hierarchies	hypernyms_misc	appliance is to blender as sandwich is to	hamburger	toaster	0.1	0	{'toaster': 0.1, '?': 0.08, 'what': 0.08, '______': 0.06, ':': 0.06}	219	0.000253677	0.102285	0.997818	key	key|target	0.73	TRUE	TRUE	TRUE	target	{'hamburger': 0.73}
Semantic Relations	animal_shelter	ape is to grove as goldfish is to	pond	______	0.1	0	{'______': 0.1, 'aquarium': 0.06, 'bowl': 0.06, '_____': 0.05, '?': 0.05}	19	0.00909424	0.0949097	0.999811	key	key|target	0.73	TRUE	TRUE	TRUE	target	{'pond': 0.73}
Semantic Relations	antonyms_gradable	pale is to tanned as tasty is to	tasteless	"	0.1	0	{'"': 0.1, '______': 0.04, '': 0.03, '___': 0.03}	183	0.000518799	0.0951843	0.998176	key	key|target	0.73	TRUE	TRUE	TRUE	target	{'tasteless': 0.73}
Semantic Relations	antonyms_binary	ahead is to behind as employ is to	dismiss	______	0.1	0	{'______': 0.1, '_____': 0.08, '': 0.06, '____': 0.04, 'employee': 0.04}	71	0.00158691	0.0970459	0.999292	key	key|target	0.73	TRUE	TRUE	TRUE	target	{'dismiss': 0.73}
Morphological Modifiers	verb+ment_irreg	agree is to agreement as harass is to	harassment	?	0.09	0	{'?': 0.04, '______': 0.06, '': 0.05, 'harmony': 0.04}	7	0.0217285	0.064209	0.99993	key	key|target	0.73	TRUE	TRUE	TRUE	target	{'harassment': 0.73}
Morphological Modifiers	comparative	warm is to warmer as weak is to	weaker		0.09	0	{'': 0.05, 'stronger': 0.06, '?': 0.05}	12	0.0189209	0.0714111	0.99988	key	key|target	0.73	TRUE	TRUE	TRUE	target	{'weaker': 0.73}
Semantic Hierarchies	hypernyms_misc	diary is to journal as postcard is to	card	______	0.09	0	{'______': 0.09, '__': 0.07, '': 0.04, '____': 0.03}	31	0.00598145	0.0819092	0.999691	key	key|target	0.73	TRUE	TRUE	TRUE	target	{'card': 0.73}
Semantic Hierarchies	hypernyms_misc	journal is to diary as picture is to	photo	______	0.09	0	{'______': 0.09, '_____': 0.06, '__': 0.06, '____': 0.05, '': 0.04}	15	0.0136108	0.0806274	0.999851	key	key|target	0.73	TRUE	TRUE	TRUE	target	{'photo': 0.73}
Semantic Relations	animal_sound	dog is to bark as whale is to	sing	swim	0.09	0	{'swim': 0.09, '______': 0.06, '_____': 0.05, '____': 0.05, '?': 0.04}	11	0.026123	0.0651855	0.99989	key	key|target	0.73	TRUE	TRUE	TRUE	target	{'sing': 0.73}
Semantic Relations	male_female	gentleman is to lady as waiter is to	waitress	customer	0.09	0	{'customer': 0.09, '______': 0.08, 'what': 0.08, '____': 0.05, '_': 0.04}	7	0.0393066	0.0490723	0.99993	key	key|target	0.73	TRUE	TRUE	TRUE	target	{'waitress': 0.73}
Verbal & Grammatical Forms	adjective_to_adverb	rapidly is to rapid as immediately is to	immediate	immediately	0.09	0	{'immediately': 0.09, 'instantly': 0.06, '______': 0.06, '': 0.06, 'slowly': 0.05}	26	0.00717163	0.0802307	0.999741	key	key|target	0.73	TRUE	TRUE	TRUE	target	{'immediate': 0.73}
Verbal & Grammatical Forms	verb_3pSg_Ved	married is to marries as related is to	relates		0.09	0	{'': 0.09, '?': 0.07, '______': 0.05, 'related': 0.05, 'relatives': 0.04}	7	0.0302734	0.0629883	0.99993	key	key|target	0.73	TRUE	TRUE	TRUE	target	{'relates': 0.73}
Factual Knowledge	capital_world	Afghanistan is to Kabul as China is to	beijing	?	0.08	0	{'?': 0.08, ':': 0.07, '______': 0.05, '': 0.05, '____': 0.05}	10	0.026001	0.0540771	0.9999	key	key|target	0.73	TRUE	TRUE	TRUE	target	{'beijing': 0.73}
Morphological Modifiers	adj_superlative	neatest is to neat as vaguest is to	vague	______	0.08	0	{'______': 0.08, '': 0.05, '_____': 0.05, ':': 0.05, '____': 0.04}	13	0.0167236	0.0682373	0.99987	key	key|target	0.73	TRUE	TRUE	TRUE	target	{'vague': 0.73}
Morphological Modifiers	noun+less_reg	bone is to boneless as remorse is to	remorseless	______	0.08	0	{'______': 0.08, '': 0.04, '?': 0.05, '____': 0.04}	12	0.0200195	0.0644531	0.99988	key	key|target	0.73	TRUE	TRUE	TRUE	target	{'remorseless': 0.73}
Morphological Modifiers	over+adj_reg	strained is to overstrained as stretched is to	overstretched	what	0.08	0	{'what': 0.08, '': 0.03, '______': 0.07, '?': 0.06}	24	0.00836182	0.0707397	0.999761	key	key|target	0.73	TRUE	TRUE	TRUE	target	{'overstretched': 0.73}
Semantic Relations	animal_sound	beetle is to drone as seal is to	bark		0.08	0	{'': 0.06, '?': 0.06, ':': 0.04, 'a': 0.03}	15	0.0164795	0.0670166	0.999851	key	key|target	0.73	TRUE	TRUE	TRUE	target	{'bark': 0.73}
Semantic Relations	animal_sound	cricket is to chirp as monkey is to	chatter	______	0.08	0	{'______': 0.08, '_____': 0.06, 'what': 0.06, '': 0.05, 'climb': 0.04}	47	0.00393677	0.0800476	0.999532	key	key|target	0.73	TRUE	TRUE	TRUE	target	{'chatter': 0.73}
Semantic Relations	animal_shelter	crocodile is to river as wasp is to	nest		0.08	0	{'': 0.05, '?': 0.06, 'hive': 0.05, ':': 0.04}	5	0.0332031	0.0419922	0.99995	key	key|target	0.73	TRUE	TRUE	TRUE	target	{'nest': 0.73}
Morphological Modifiers	adj_superlative	neat is to neatest as tasty is to	tastiest	______	0.07	0	{'______': 0.07, '?': 0.06, ':': 0.05, '__': 0.04, '': 0.04}	8	0.0351562	0.0390625	0.99992	key	key|target	0.73	TRUE	TRUE	TRUE	target	{'tastiest': 0.73}
Morphological Modifiers	over+adj_reg	populated is to overpopulated as zealous is to	overzealous		0.07	0	{'': 0.05, '______': 0.07, ':': 0.04, '__': 0.03}	54	0.00248718	0.0702667	0.999462	key	key|target	0.73	TRUE	TRUE	TRUE	target	{'overzealous': 0.73}
Morphological Modifiers	comparative	short is to shorter as strong is to	stronger		0.07	0	{'': 0.05, '?': 0.07, 'weaker': 0.05, ':': 0.05}	11	0.0269775	0.0462646	0.99989	key	key|target	0.73	TRUE	TRUE	TRUE	target	{'stronger': 0.73}
Semantic Relations	animal_shelter	bat is to cave as bear is to	den	_____	0.07	0	{'_____': 0.07, 'forest': 0.07, '': 0.05, '______': 0.05, 'what': 0.04}	9	0.0211182	0.0526123	0.99991	key	key|target	0.73	TRUE	TRUE	TRUE	target	{'den': 0.73, 'growl': 0.12}
Semantic Relations	male_female	bull is to cow as waiter is to	waitress	______	0.07	0	{'______': 0.07, 'customer': 0.06, '____': 0.06, 'restaurant': 0.05, 'cook': 0.05}	12	0.0217285	0.0495605	0.99988	key	key|target	0.73	TRUE	TRUE	TRUE	target	{'waitress': 0.73}
Verbal & Grammatical Forms	noun_plural_irreg	industry is to industries as property is to	properties		0.07	0	{'': 0.07, 'land': 0.06, 'the': 0.05, 'capitalism': 0.05, 'real': 0.04}	22	0.00830078	0.0654297	0.999781	key	key|target	0.73	TRUE	TRUE	TRUE	target	{'properties': 0.73}
Morphological Modifiers	over+adj_reg	powered is to overpowered as zealous is to	overzealous	______	0.06	0	{'______': 0.06, ':': 0.05, '': 0.04, '"': 0.05}	28	0.00561523	0.0588379	0.999721	key	key|target	0.73	TRUE	TRUE	TRUE	target	{'overzealous': 0.73}
Morphological Modifiers	verb+er_irreg	baker is to bake as observer is to	observe	?	0.06	0	{'?': 0.06, 'what': 0.06, 'a': 0.05, '': 0.05, '_____': 0.04}	5	0.0412598	0.0227051	0.99995	key	key|target	0.73	TRUE	TRUE	TRUE	target	{'observe': 0.73}
Semantic Hierarchies	hypernyms_misc	hairpin is to pin as lotion is to	toiletry	______	0.06	0	{'______': 0.06, 'lotion': 0.05, 'shampoo': 0.04, '?': 0.04, 'what': 0.04}	62	0.00202942	0.0575409	0.999382	key	key|target	0.73	TRUE	TRUE	TRUE	target	{'toiletry': 0.73}
Verbal & Grammatical Forms	past_tense	read is to reading as described is to	describing	______	0.06	0	{'______': 0.06, ':': 0.05, '': 0.04, 'A': 0.04, 'a': 0.04}	19	0.0112915	0.0536499	0.999811	key	key|target	0.73	TRUE	TRUE	TRUE	target	{'describing': 0.73}
Verbal & Grammatical Forms	noun_plural_irreg	industry is to industries as loss is to	losses	profit	0.06	0	{'profit': 0.06, '______': 0.05, ':': 0.05, '': 0.05, '"': 0.04}	81	0.00158691	0.0579834	0.999193	key	key|target	0.73	TRUE	TRUE	TRUE	target	{'losses': 0.73}
Morphological Modifiers	adj+ness_reg	oddness is to odd as seriousness is to	serious	humor	0.05	0	{'humor': 0.05, '"': 0.05, '______': 0.03, 'seriousness': 0.03, '': 0.03}	55	0.00340271	0.0498199	0.999452	key	key|target	0.73	TRUE	TRUE	TRUE	target	{'serious': 0.73}
Verbal & Grammatical Forms	noun_plural_irreg	category is to categories as series is to	series	numbers	0.42	0	{'numbers': 0.42, 'sets': 0.18, 'sequences': 0.11, 'number': 0.02, 'sums': 0.02}	113	0.000246048	0.41577	0.998874	original	target	0.72	TRUE	TRUE	TRUE	target	{'series': 0.72}
Verbal & Grammatical Forms	noun_plural_irreg	memories is to memory as species is to	species	evolution	0.16	0	{'evolution': 0.16, 'organisms': 0.08, 'life': 0.07, 'population': 0.06, 'organism': 0.05}	7	0.0354004	0.123779	0.99993	original	target	0.72	TRUE	TRUE	TRUE	target	{'species': 0.72}
Morphological Modifiers	re+verb_reg	create is to recreate as emerge is to	reemerge	emerge	0.58	0	{'emerge': 0.58, 'immer': 0.09, 'merge': 0.07, 'em': 0.07, 'emerg': 0.03}	9	0.00253296	0.579498	0.99991	key	key|target	0.72	TRUE	TRUE	TRUE	target	{'reemerge': 0.72}
Morphological Modifiers	re+verb_reg	decorate is to redecorate as upload is to	reupload	upload	0.57	0	{'upload': 0.57, '__': 0.02, 'uploading': 0.02, 'download': 0.02, '': 0.01}	36	0.00230408	0.564102	0.999641	key	key|target	0.72	TRUE	TRUE	TRUE	target	{'reupload': 0.72}
Semantic Relations	animal_sound	seal is to bark as wasp is to	buzz	sting	0.56	0	{'sting': 0.56, '______': 0.05, '__': 0.04, '': 0.02, '_____': 0.02}	10	0.00848389	0.55011	0.9999	key	key|target	0.72	TRUE	TRUE	TRUE	target	{'buzz': 0.72}
Semantic Relations	animal_sound	crow is to caw as tiger is to	growl	roar	0.55	0	{'roar': 0.55, '_____': 0.03, '______': 0.03, '____': 0.02, '_': 0.02}	8	0.0177002	0.533081	0.99992	key	key|target	0.72	TRUE	TRUE	TRUE	target	{'growl': 0.72}
Morphological Modifiers	re+verb_reg	decorate is to redecorate as send is to	resend	send	0.46	0	{'send': 0.46, 'sent': 0.09, 'sending': 0.05, 'mail': 0.03, 'message': 0.01}	6	0.0116577	0.453186	0.99994	key	key|target	0.72	TRUE	TRUE	TRUE	target	{'resend': 0.72}
Factual Knowledge	capital_world	Doha is to Qatar as Manila is to	philippines	the	0.45	0	{'the': 0.45, '______': 0.1, '__': 0.05, ':': 0.04, '___': 0.04}	5	0.0334473	0.413818	0.99995	key	key|target	0.72	TRUE	TRUE	TRUE	target	{'philippines': 0.72}
Semantic Relations	antonyms_binary	decrement is to increment as outward is to	upward	inward	0.44	0	{'inward': 0.44, '"': 0.06, '______': 0.03, '",': 0.02, '____': 0.02}	45	0.00241089	0.440948	0.999552	key	key|target	0.72	TRUE	TRUE	TRUE	target	{'upward': 0.72}
Factual Knowledge	capital_world	Gaborone is to Botswana as Nassau is to	bahamas	the	0.32	0	{'the': 0.32, 'The': 0.22, '__': 0.09, '______': 0.08, '': 0.03}	12	0.00964355	0.314575	0.99988	key	key|target	0.72	TRUE	TRUE	TRUE	target	{'bahamas': 0.72}
Morphological Modifiers	re+verb_reg	emerge is to reemerge as generate is to	regenerate	generate	0.3	0	{'generate': 0.3, 'produce': 0.06, 'create': 0.05, 'originate': 0.03, 'genesis': 0.03}	11	0.0108032	0.286072	0.99989	key	key|target	0.72	TRUE	TRUE	TRUE	target	{'regenerate': 0.72}
Semantic Relations	antonyms_binary	posterior is to anterior as sink is to	rise	faucet	0.3	0	{'faucet': 0.3, 'stove': 0.04, 'toilet': 0.04, 'drain': 0.04, 'dishwasher': 0.03}	5095	1.40816e-06	0.296874	0.949229	key	key|target	0.72	TRUE	TRUE	TRUE	target	{'rise': 0.72}
Morphological Modifiers	over+adj_reg	thrown is to overthrown as written is to	overwritten	written	0.24	0	{'written': 0.24, '______': 0.08, 'write': 0.08, '_____': 0.03, '': 0.03}	99	0.000797272	0.24139	0.999013	key	key|target	0.72	TRUE	TRUE	TRUE	target	{'overwritten': 0.72}
Verbal & Grammatical Forms	plural	computers is to computer as pears is to	pear	apples	0.24	0	{'apples': 0.24, 'fruit': 0.14, '__': 0.04, '______': 0.03, 'oranges': 0.03}	41	0.0020752	0.238159	0.999591	key	key|target	0.72	TRUE	TRUE	TRUE	target	{'pear': 0.72}
Morphological Modifiers	over+adj_reg	compensated is to overcompensated as written is to	overwritten	unw	0.22	0	{'unw': 0.22, 'rewritten': 0.08, 'written': 0.06, 'spoken': 0.05, '______': 0.03}	25	0.00439453	0.220215	0.999751	key	key|target	0.72	TRUE	TRUE	TRUE	target	{'overwritten': 0.72}
Semantic Relations	antonyms_gradable	rare is to common as flat is to	lumpy	round	0.21	0	{'round': 0.21, 'sharp': 0.08, 'curved': 0.07, 'rounded': 0.03, 'fat': 0.03}	1022	3.52859e-05	0.209926	0.989816	key	key|target	0.72	TRUE	TRUE	TRUE	target	{'lumpy': 0.72}
Verbal & Grammatical Forms	noun_plural_reg	governments is to government as hours is to	hour	days	0.2	0	{'days': 0.2, 'time': 0.11, 'a': 0.08, 'day': 0.07, 'minutes': 0.06}	22	0.00460815	0.196564	0.999781	key	key|target	0.72	TRUE	TRUE	TRUE	target	{'hour': 0.72}
Semantic Hierarchies	hypernyms_misc	shirt is to clothes as toothbrush is to	brush	?	0.19	0	{'?': 0.04, '': 0.06, '?"': 0.04}	59	0.00151825	0.185005	0.999412	key	key|target	0.72	TRUE	TRUE	TRUE	target	{'brush': 0.72}
Semantic Hierarchies	hypernyms_misc	pie is to pastry as sunscreen is to	cream	skin	0.19	0	{'skin': 0.19, 'the': 0.08, 'a': 0.07, 'sun': 0.06, 'sunscreen': 0.05}	229	0.000326157	0.19108	0.997718	key	key|target	0.72	TRUE	TRUE	TRUE	target	{'cream': 0.72}
Semantic Relations	antonyms_gradable	abundant is to scarce as sane is to	crazy	insane	0.19	0	{'insane': 0.19, '______': 0.07, '': 0.06, '_____': 0.04, '____': 0.03}	7	0.0270996	0.1604	0.99993	key	key|target	0.72	TRUE	TRUE	TRUE	target	{'crazy': 0.72}
Verbal & Grammatical Forms	noun_plural_irreg	energies is to energy as wives is to	wife	women	0.19	0	{'women': 0.19, 'husbands': 0.1, 'wives': 0.08, 'marriage': 0.08, 'marriages': 0.03}	12	0.0112305	0.17627	0.99988	key	key|target	0.72	TRUE	TRUE	TRUE	target	{'wife': 0.72}
Semantic Relations	nationality_adjective	Germany is to German as Belarus is to	belorussian	Belarus	0.18	0	{'Belarus': 0.18, '______': 0.17, '__': 0.05, 'Russian': 0.05, ':': 0.04}	6	0.0317383	0.149902	0.99994	key	key|target	0.72	TRUE	TRUE	TRUE	target	{'belorussian': 0.72}
Semantic Relations	male_female	son is to daughter as tiger is to	tigress	lion	0.18	0	{'lion': 0.18, 'cub': 0.09, 'what': 0.07, '______': 0.06, '__': 0.04}	635	3.14713e-05	0.17575	0.993672	key	key|target	0.72	TRUE	TRUE	TRUE	target	{'tigress': 0.72}
Morphological Modifiers	verb+ment_irreg	amendment is to amend as disagreement is to	disagree	agreement	0.17	0	{'agreement': 0.17, 'agree': 0.09, 'consent': 0.06, 'ass': 0.05, 'conc': 0.03}	15	0.00732422	0.158691	0.999851	key	key|target	0.72	TRUE	TRUE	TRUE	target	{'disagree': 0.72}
Morphological Modifiers	re+verb_reg	assure is to reassure as introduce is to	reintroduce	?	0.17	0	{'?': 0.04, 'introduce': 0.09, '': 0.08}	15	0.0111084	0.15686	0.999851	key	key|target	0.72	TRUE	TRUE	TRUE	target	{'reintroduce': 0.72}
Factual Knowledge	capital_world	Senegal is to Dakar as Sudan is to	khartoum	?	0.15	0	{'?': 0.15, ':': 0.06, 'what': 0.05, '': 0.04}	8	0.0258789	0.123535	0.99992	key	key|target	0.72	TRUE	TRUE	TRUE	target	{'khartoum': 0.72}
Morphological Modifiers	verb+ment_irreg	disagreement is to disagree as entertainment is to	entertain	entertainment	0.15	0	{'entertainment': 0.15, 'boredom': 0.06, 'art': 0.05, 'education': 0.02, 'the': 0.02}	5	0.0163574	0.130127	0.99995	key	key|target	0.72	TRUE	TRUE	TRUE	target	{'entertain': 0.72}
Morphological Modifiers	re+verb_reg	assure is to reassure as develop is to	redevelop	?	0.15	0	{'?': 0.15, '': 0.04, 'develop': 0.09, '______': 0.06}	55	0.00167084	0.14872	0.999452	key	key|target	0.72	TRUE	TRUE	TRUE	target	{'redevelop': 0.72}
Semantic Relations	male_female	emperor is to empress as tiger is to	tigress	lion	0.14	0	{'lion': 0.14, ':': 0.06, '______': 0.05, 'what': 0.04, 'tiger': 0.04}	306	0.000146866	0.139502	0.996951	key	key|target	0.72	TRUE	TRUE	TRUE	target	{'tigress': 0.72}
Verbal & Grammatical Forms	noun_plural_irreg	category is to categories as variety is to	varieties	sets	0.14	0	{'sets': 0.14, 'set': 0.13, 'ring': 0.12, 'algebra': 0.09, 'schemes': 0.07}	14	0.0184326	0.126099	0.99986	key	key|target	0.72	TRUE	TRUE	TRUE	target	{'varieties': 0.72}
Factual Knowledge	UK_city_county	leicester is to midlands as newport is to	gwent	w	0.13	0	{'w': 0.13, '?': 0.07, 'south': 0.07, '': 0.04, 'what': 0.03}	1379	8.52346e-06	0.128898	0.986258	key	key|target	0.72	TRUE	TRUE	TRUE	target	{'gwent': 0.72}
Verbal & Grammatical Forms	noun_plural_irreg	categories is to category as duties is to	duty	morality	0.13	0	{'morality': 0.13, 'virtue': 0.08, 'virtues': 0.06, 'moral': 0.04, 'rights': 0.04}	19	0.00915527	0.117798	0.999811	key	key|target	0.72	TRUE	TRUE	TRUE	target	{'duty': 0.72}
Morphological Modifiers	verb+able_reg	consider is to considerable as represent is to	representable	?	0.12	0	{'?': 0.06, '': 0.05}	16	0.0123291	0.10437	0.999841	key	key|target	0.72	TRUE	TRUE	TRUE	target	{'representable': 0.72}
Morphological Modifiers	adj+ness_reg	connectedness is to connected as righteousness is to	righteous	sin	0.12	0	{'sin': 0.12, 'righteousness': 0.08, 'un': 0.07, '______': 0.04, 'justice': 0.04}	8	0.0200195	0.0952148	0.99992	key	key|target	0.72	TRUE	TRUE	TRUE	target	{'righteous': 0.72}
Morphological Modifiers	over+adj_reg	charged is to overcharged as written is to	overwritten	rewritten	0.12	0	{'rewritten': 0.12, 'unw': 0.07, 'erased': 0.06, 'read': 0.06, '______': 0.04}	26	0.00576782	0.117279	0.999741	key	key|target	0.72	TRUE	TRUE	TRUE	target	{'overwritten': 0.72}
Semantic Hierarchies	hypernyms_misc	hairnet is to net as tub is to	container		0.12	0	{'': 0.03, '?': 0.08, ':': 0.06}	220	0.000237465	0.122809	0.997808	key	key|target	0.72	TRUE	TRUE	TRUE	target	{'container': 0.72}
Semantic Hierarchies	hypernyms_misc	hairpin is to pin as perfume is to	toiletry	______	0.12	0	{'______': 0.12, 'col': 0.05, '__': 0.04, 'fragrance': 0.03, 'smell': 0.03}	34	0.00543213	0.110291	0.999661	key	key|target	0.72	TRUE	TRUE	TRUE	target	{'toiletry': 0.72}
Semantic Hierarchies	hypernyms_misc	hairpin is to pin as plum is to	fruit	prune	0.12	0	{'prune': 0.12, '______': 0.07, 'plum': 0.06, '__': 0.04, 'pl': 0.04}	13	0.0112915	0.110291	0.99987	key	key|target	0.72	TRUE	TRUE	TRUE	target	{'fruit': 0.72}
Verbal & Grammatical Forms	noun_plural_reg	colleges is to college as products is to	product	company	0.12	0	{'company': 0.12, 'factory': 0.04, '__': 0.04, 'companies': 0.04, 'market': 0.04}	6	0.0314941	0.0856934	0.99994	key	key|target	0.72	TRUE	TRUE	TRUE	target	{'product': 0.72}
Verbal & Grammatical Forms	present_participle	coding is to code as seeing is to	see	seeing	0.12	0	{'seeing': 0.12, 'looking': 0.08, 'vision': 0.05, 'sight': 0.04, 'look': 0.04}	18	0.0107422	0.10498	0.999821	key	key|target	0.72	TRUE	TRUE	TRUE	target	{'see': 0.72}
Morphological Modifiers	re+verb_reg	assure is to reassure as emerge is to	reemerge		0.11	0	{'': 0.05, '?': 0.05, 'emerge': 0.06}	5	0.050293	0.0629883	0.99995	key	key|target	0.72	TRUE	TRUE	TRUE	target	{'reemerge': 0.72}
Semantic Relations	male_female	sow is to boar as heiress is to	heir	______	0.11	0	{'______': 0.11, '_': 0.06, '"': 0.05, '_____': 0.03, '____': 0.03}	6	0.0286865	0.0777588	0.99994	key	key|target	0.72	TRUE	TRUE	TRUE	target	{'heir': 0.72}
Semantic Relations	male_female	fisherwoman is to fisherman as headmistress is to	headmaster	_	0.11	0	{'_': 0.11, '?': 0.07, '__': 0.08, '': 0.07}	5	0.0559082	0.0500488	0.99995	key	key|target	0.72	TRUE	TRUE	TRUE	target	{'headmaster': 0.72}
Morphological Modifiers	over+adj_reg	booked is to overbooked as sized is to	oversized	?	0.1	0	{'?': 0.1, 'sized': 0.07, '': 0.06, ':': 0.06, 'what': 0.05}	7	0.0267334	0.0723877	0.99993	key	key|target	0.72	TRUE	TRUE	TRUE	target	{'oversized': 0.72}
Morphological Modifiers	over+adj_reg	compensated is to overcompensated as zealous is to	overzealous	______	0.1	0	{'______': 0.1, '': 0.04, '__': 0.04, '____': 0.04}	22	0.00756836	0.0905762	0.999781	key	key|target	0.72	TRUE	TRUE	TRUE	target	{'overzealous': 0.72}
Morphological Modifiers	over+adj_reg	loaded is to overloaded as zealous is to	overzealous	______	0.1	0	{'______': 0.1, '': 0.05, ':': 0.04, '__': 0.04}	33	0.00421143	0.0914917	0.999671	key	key|target	0.72	TRUE	TRUE	TRUE	target	{'overzealous': 0.72}
Semantic Relations	animal_sound	elephant is to trumpet as toad is to	ribbit	cro	0.1	0	{'cro': 0.1, '': 0.03, '______': 0.04, ':': 0.04}	11	0.0201416	0.0823975	0.99989	key	key|target	0.72	TRUE	TRUE	TRUE	target	{'ribbit': 0.72}
Semantic Relations	antonyms_binary	front is to back as submerge is to	emerge		0.1	0	{'': 0.07, '?': 0.08, '_____': 0.04, ':': 0.04}	15	0.0142822	0.0848389	0.999851	key	key|target	0.72	TRUE	TRUE	TRUE	target	{'emerge': 0.72}
Semantic Relations	antonyms_binary	exit is to entrance as submerge is to	emerge	?	0.1	0	{'?': 0.1, '': 0.06, '"': 0.05, ':': 0.04}	11	0.0195312	0.0795898	0.99989	key	key|target	0.72	TRUE	TRUE	TRUE	target	{'emerge': 0.72}
Verbal & Grammatical Forms	noun_plural_irreg	universities is to university as women is to	woman	______	0.1	0	{'______': 0.1, 'women': 0.07, 'men': 0.07, '____': 0.04, 'what': 0.04}	26	0.00668335	0.0914612	0.999741	key	key|target	0.72	TRUE	TRUE	TRUE	target	{'woman': 0.72}
Morphological Modifiers	over+adj_reg	populated is to overpopulated as stretched is to	overstretched	______	0.09	0	{'______': 0.09, 'what': 0.08, '': 0.05, '__': 0.04, '?': 0.03}	9	0.0169678	0.0689697	0.99991	key	key|target	0.72	TRUE	TRUE	TRUE	target	{'overstretched': 0.72}
Morphological Modifiers	over+adj_reg	played is to overplayed as stretched is to	overstretched	______	0.09	0	{'______': 0.09, '': 0.04, '_____': 0.04, '?': 0.04, 'what': 0.04}	30	0.00628662	0.0864868	0.999701	key	key|target	0.72	TRUE	TRUE	TRUE	target	{'overstretched': 0.72}
Morphological Modifiers	verb+er_irreg	choreograph is to choreographer as eat is to	eater		0.09	0	{'': 0.06, 'what': 0.09, 'food': 0.06, ':': 0.04}	5	0.0380859	0.0532227	0.99995	key	key|target	0.72	TRUE	TRUE	TRUE	target	{'eater': 0.72}
Semantic Relations	animal_sound	cricket is to chirp as sheep is to	baa	_____	0.09	0	{'_____': 0.09, '______': 0.08, '___': 0.08, '____': 0.05, '': 0.03}	166	0.00044632	0.090374	0.998346	key	key|target	0.72	TRUE	TRUE	TRUE	target	{'baa': 0.72}
Semantic Relations	animal_shelter	gorilla is to grove as hippopotamus is to	river		0.09	0	{'': 0.06, '?': 0.06, '______': 0.05, '_____': 0.05}	39	0.00497437	0.0804749	0.999611	key	key|target	0.72	TRUE	TRUE	TRUE	target	{'river': 0.72}
Semantic Relations	male_female	heir is to heiress as nephew is to	niece	what	0.09	0	{'what': 0.09, '?': 0.08, '______': 0.06, ':': 0.05, '': 0.05}	7	0.0332031	0.0566406	0.99993	key	key|target	0.72	TRUE	TRUE	TRUE	target	{'niece': 0.72}
Semantic Relations	male_female	fisherman is to fisherwoman as mister is to	miss	_	0.09	0	{'_': 0.09, '?': 0.08, '': 0.06, 'what': 0.06}	8	0.026123	0.0593262	0.99992	key	key|target	0.72	TRUE	TRUE	TRUE	target	{'miss': 0.72}
Semantic Relations	antonyms_gradable	aware is to unaware as close is to	distant	______	0.09	0	{'______': 0.09, '?': 0.07, '': 0.07, '_____': 0.06, '____': 0.05}	16	0.013916	0.0769043	0.999841	key	key|target	0.72	TRUE	TRUE	TRUE	target	{'distant': 0.72}
Verbal & Grammatical Forms	noun_plural_reg	solutions is to solution as weeks is to	week	months	0.09	0	{'months': 0.09, 'weeks': 0.09, 'years': 0.09, 'days': 0.07, '______': 0.04}	42	0.00268555	0.0915527	0.999581	key	key|target	0.72	TRUE	TRUE	TRUE	target	{'week': 0.72}
Morphological Modifiers	verb+ment_irreg	agree is to agreement as entertain is to	entertainment		0.08	0	{'': 0.08, '?': 0.03}	24	0.00753784	0.068634	0.999761	key	key|target	0.72	TRUE	TRUE	TRUE	target	{'entertainment': 0.72}
Morphological Modifiers	comparative	high is to higher as quick is to	quicker		0.08	0	{'': 0.04, '"': 0.05, '?': 0.04}	20	0.0131836	0.0625	0.999801	key	key|target	0.72	TRUE	TRUE	TRUE	target	{'quicker': 0.72}
Semantic Relations	animal_sound	cricket is to chirp as whale is to	sing		0.08	0	{'': 0.06, '_____': 0.06, '(': 0.05, '______': 0.04}	10	0.0222168	0.0603027	0.9999	key	key|target	0.72	TRUE	TRUE	TRUE	target	{'sing': 0.72}
Semantic Relations	animal_sound	leopard is to growl as raven is to	caw		0.08	0	{'': 0.06, ':': 0.07, '?': 0.05, '(': 0.04}	474	4.93526e-05	0.0814936	0.995277	key	key|target	0.72	TRUE	TRUE	TRUE	target	{'caw': 0.72}
Semantic Relations	antonyms_gradable	hesitating is to decisive as flat is to	lumpy	round	0.08	0	{'round': 0.08, 'tall': 0.04, 'fat': 0.03, 'cur': 0.02, 'high': 0.02}	3547	1.20997e-05	0.0766481	0.964654	key	key|target	0.72	TRUE	TRUE	TRUE	target	{'lumpy': 0.72}
Semantic Relations	antonyms_gradable	dangerous is to safe as organized is to	unorganized	dis	0.08	0	{'dis': 0.08, '______': 0.05, '': 0.05, '"': 0.04, '_____': 0.04}	11	0.019165	0.0614014	0.99989	key	key|target	0.72	TRUE	TRUE	TRUE	target	{'unorganized': 0.72}
Factual Knowledge	name_occupation	dickens is to novelist as michelangelo is to	sculptor	artist	0.07	0	{'artist': 0.07, '?': 0.07, ':': 0.06, 'a': 0.06}	7	0.034668	0.0385742	0.99993	key	key|target	0.72	TRUE	TRUE	TRUE	target	{'sculptor': 0.72}
Morphological Modifiers	adj_superlative	polite is to politest as ugly is to	ugliest	:	0.07	0	{':': 0.07, '______': 0.06, '?': 0.06, '': 0.04}	14	0.0170898	0.050293	0.99986	key	key|target	0.72	TRUE	TRUE	TRUE	target	{'ugliest': 0.72}
Morphological Modifiers	superlative	luckiest is to lucky as hottest is to	hot	"	0.07	0	{'"': 0.07, 'cold': 0.05, ':': 0.05, '______': 0.04, '': 0.03}	5	0.034668	0.0390625	0.99995	key	key|target	0.72	TRUE	TRUE	TRUE	target	{'hot': 0.72}
Morphological Modifiers	adj+ly_reg	differently is to different as historically is to	historical	______	0.07	0	{'______': 0.07, '_____': 0.04, 'historically': 0.04, '': 0.03, 'what': 0.03}	23	0.0106812	0.0635376	0.999771	key	key|target	0.72	TRUE	TRUE	TRUE	target	{'historical': 0.72}
Semantic Hierarchies	hypernyms_misc	toiletry is to perfume as card is to	postcard	deck	0.07	0	{'deck': 0.07, '____': 0.05, '__': 0.04, 'playing': 0.03, '?': 0.03}	36	0.00384521	0.0689087	0.999641	key	key|target	0.72	TRUE	TRUE	TRUE	target	{'postcard': 0.72}
Semantic Relations	animal_shelter	cricket is to nest as dog is to	doghouse	_____	0.07	0	{'_____': 0.07, 'kenn': 0.05, 'bark': 0.05, 'bur': 0.04, 'bone': 0.04}	17	0.0117798	0.0604858	0.999831	key	key|target	0.72	TRUE	TRUE	TRUE	target	{'doghouse': 0.72}
Semantic Relations	animal_shelter	baboon is to grove as dog is to	doghouse	_____	0.07	0	{'_____': 0.07, 'kenn': 0.04, '______': 0.04, 'pack': 0.03, '': 0.03}	34	0.00628662	0.0610962	0.999661	key	key|target	0.72	TRUE	TRUE	TRUE	target	{'doghouse': 0.72}
Verbal & Grammatical Forms	noun_plural_reg	nights is to night as periods is to	period	______	0.07	0	{'______': 0.07, 'months': 0.04, '': 0.04, 'periods': 0.04, 'month': 0.04}	14	0.0166016	0.0488281	0.99986	key	key|target	0.72	TRUE	TRUE	TRUE	target	{'period': 0.72}
Morphological Modifiers	verb+ment_irreg	alignment is to align as entitlement is to	entitle	deserve	0.06	0	{'deserve': 0.06, 'entitlement': 0.05, 'earn': 0.04, 'be': 0.03, 'claim': 0.02}	5	0.0212402	0.036377	0.99995	key	key|target	0.72	TRUE	TRUE	TRUE	target	{'entitle': 0.72}
Morphological Modifiers	verb+able_reg	admire is to admirable as predict is to	predictable		0.06	0	{'': 0.06, ':': 0.06, '______': 0.05, '"': 0.05}	10	0.0205078	0.0429688	0.9999	key	key|target	0.72	TRUE	TRUE	TRUE	target	{'predictable': 0.72}
Semantic Relations	male_female	heir is to heiress as mister is to	miss	?	0.06	0	{'?': 0.06, 'mistress': 0.06, 'what': 0.06, '': 0.05}	6	0.050293	0.0141602	0.99994	key	key|target	0.72	TRUE	TRUE	TRUE	target	{'miss': 0.72}
Semantic Relations	male_female	sow is to boar as madam is to	sir	gentleman	0.06	0	{'gentleman': 0.06, '_': 0.05, '': 0.04, '______': 0.04, 'what': 0.04}	23	0.00976562	0.0541992	0.999771	key	key|target	0.72	TRUE	TRUE	TRUE	target	{'sir': 0.72}
Semantic Hierarchies	hyponyms_misc	choker is to collar as teacup is to	cup		0.11	0	{'': 0.05, '?': 0.06, 'what': 0.05, ':': 0.04}	8	0.0283203	0.0771484	0.99992	greedy	pair_values|target	0.72	TRUE	TRUE	TRUE	target	{'cup': 0.72}
Verbal & Grammatical Forms	noun_plural_irreg	species is to species as women is to	woman	men	0.62	0	{'men': 0.62, 'women': 0.09, 'man': 0.06, '______': 0.03, '__': 0.01}	14	0.00360107	0.621399	0.99986	example_value	example_value|target	0.72	TRUE	TRUE	TRUE	target	{'woman': 0.72}
Verbal & Grammatical Forms	noun_plural_irreg	series is to series as societies is to	society	societies	0.29	0	{'societies': 0.29, '______': 0.11, '__': 0.03, '_____': 0.03, '____': 0.03}	10	0.0135498	0.275513	0.9999	example_value	example_value|target	0.72	TRUE	TRUE	TRUE	target	{'society': 0.72}
Verbal & Grammatical Forms	noun_plural_irreg	cities is to city as species is to	species	genus	0.17	0	{'genus': 0.17, '______': 0.07, '': 0.02, '_____': 0.03}	13	0.0145264	0.152466	0.99987	original	target	0.71	TRUE	TRUE	TRUE	target	{'species': 0.71}
Semantic Relations	antonyms_binary	forget is to remember as outward is to	upward	inward	0.69	0	{'inward': 0.69, 'inner': 0.02, 'in': 0.02, 'inside': 0.02, '______': 0.01}	37	0.00128174	0.686218	0.999631	key	key|target	0.71	TRUE	TRUE	TRUE	target	{'upward': 0.71}
Morphological Modifiers	re+verb_reg	reconfirm is to confirm as redeem is to	deem	redeem	0.64	0	{'redeem': 0.64, 'pay': 0.02, 'rem': 0.02, 'deliver': 0.02, 're': 0.02}	55	0.000907898	0.639717	0.999452	key	key|target	0.71	TRUE	TRUE	TRUE	target	{'deem': 0.71}
Semantic Relations	antonyms_binary	outbound is to inbound as sink is to	rise	source	0.64	0	{'source': 0.64, 'drain': 0.04, '__': 0.02, 'fountain': 0.01, '______': 0.01}	156	0.000182152	0.636537	0.998445	key	key|target	0.71	TRUE	TRUE	TRUE	target	{'rise': 0.71}
Morphological Modifiers	adj+ness_reg	connectedness is to connected as madness is to	mad	sanity	0.56	0	{'sanity': 0.56, 'madness': 0.08, '______': 0.03, 'reason': 0.03, 'sane': 0.02}	12	0.0062561	0.556244	0.99988	key	key|target	0.71	TRUE	TRUE	TRUE	target	{'mad': 0.71}
Factual Knowledge	country_capital	Lebanon is to Beirut as Georgia is to	tbilisi	Atlanta	0.55	0	{'Atlanta': 0.55, '__': 0.08, '______': 0.05, '...': 0.01, ':': 0.01}	542	1.83582e-05	0.546857	0.994599	key	key|target	0.71	TRUE	TRUE	TRUE	target	{'tbilisi': 0.71}
Morphological Modifiers	re+verb_reg	deem is to redeem as occur is to	reoccur	occur	0.45	0	{'occur': 0.45, 'happen': 0.16, '': 0.03, '__': 0.02, '______': 0.02}	68	0.000923157	0.448296	0.999322	key	key|target	0.71	TRUE	TRUE	TRUE	target	{'reoccur': 0.71}
Morphological Modifiers	re+verb_reg	apply is to reapply as upload is to	reupload	upload	0.43	0	{'upload': 0.43, 'uploaded': 0.04, 'up': 0.04, 'download': 0.02, 'load': 0.02}	18	0.00579834	0.425842	0.999821	key	key|target	0.71	TRUE	TRUE	TRUE	target	{'reupload': 0.71}
Morphological Modifiers	re+verb_reg	evaluate is to reevaluate as upload is to	reupload	upload	0.34	0	{'upload': 0.34, 'download': 0.06, 'load': 0.04, '__': 0.02, '____': 0.02}	20	0.00662231	0.333221	0.999801	key	key|target	0.71	TRUE	TRUE	TRUE	target	{'reupload': 0.71}
Verbal & Grammatical Forms	noun_plural_irreg	secretary is to secretaries as wife is to	wives	husbands	0.34	0	{'husbands': 0.34, '______': 0.04, '____': 0.04, '__': 0.03, 'what': 0.03}	6	0.0270996	0.312744	0.99994	key	key|target	0.71	TRUE	TRUE	TRUE	target	{'wives': 0.71}
Morphological Modifiers	un+adj_reg	conditional is to unconditional as interrupted is to	uninterrupted	interrupted	0.31	0	{'interrupted': 0.31, '': 0.03, '__': 0.04, '______': 0.03}	8	0.0222168	0.284424	0.99992	key	key|target	0.71	TRUE	TRUE	TRUE	target	{'uninterrupted': 0.71}
Verbal & Grammatical Forms	verb_Ving_Ved	failed is to failing as related is to	relating	related	0.31	0	{'related': 0.31, '______': 0.06, '?': 0.03, 'relationship': 0.02, '____': 0.02}	18	0.00982666	0.296814	0.999821	key	key|target	0.71	TRUE	TRUE	TRUE	target	{'relating': 0.71}
Morphological Modifiers	re+verb_reg	deem is to redeem as engage is to	reengage	engage	0.3	0	{'engage': 0.3, 'pledge': 0.12, '__': 0.04, 'ent': 0.03, '______': 0.02}	98	0.000858307	0.296017	0.999023	key	key|target	0.71	TRUE	TRUE	TRUE	target	{'reengage': 0.71}
Semantic Hierarchies	hypernyms_misc	shirt is to clothes as sidewalk is to	walk	?	0.3	0	{'?': 0.06, 'street': 0.06, 'city': 0.05, 'road': 0.04}	38	0.00396729	0.30072	0.999621	key	key|target	0.71	TRUE	TRUE	TRUE	target	{'walk': 0.71}
Factual Knowledge	capital_world	Zambia is to Lusaka as Norway is to	oslo	?	0.29	0	{'?': 0.15, '': 0.05, 'what': 0.06}	19	0.00436401	0.282745	0.999811	key	key|target	0.71	TRUE	TRUE	TRUE	target	{'oslo': 0.71}
Morphological Modifiers	re+verb_reg	define is to redefine as locate is to	relocate	locate	0.27	0	{'locate': 0.27, 'find': 0.25, 'localize': 0.04, 'discover': 0.03, 'search': 0.03}	10	0.0065918	0.264893	0.9999	key	key|target	0.71	TRUE	TRUE	TRUE	target	{'relocate': 0.71}
Semantic Hierarchies	hypernyms_misc	jacket is to clothes as tub is to	container	?	0.27	0	{'?': 0.04, '': 0.11, ':': 0.06}	464	3.02792e-05	0.269501	0.995376	key	key|target	0.71	TRUE	TRUE	TRUE	target	{'container': 0.71}
Semantic Relations	animal_sound	fly is to buzz as leopard is to	growl	roar	0.26	0	{'roar': 0.26, '______': 0.04, '_____': 0.03, '__': 0.03, ':': 0.03}	17	0.0115967	0.244263	0.999831	key	key|target	0.71	TRUE	TRUE	TRUE	target	{'growl': 0.71}
Verbal & Grammatical Forms	noun_plural_irreg	activity is to activities as wife is to	wives	husband	0.23	0	{'husband': 0.23, 'marriage': 0.1, '______': 0.07, '__': 0.04, 'mother': 0.04}	16	0.00628662	0.223206	0.999841	key	key|target	0.71	TRUE	TRUE	TRUE	target	{'wives': 0.71, 'husband': 0.12}
Morphological Modifiers	verb+ment_irreg	alignment is to align as arrangement is to	arrange	arrangement	0.21	0	{'arrangement': 0.21, 'order': 0.05, '______': 0.04, 'organize': 0.04, 'organization': 0.04}	6	0.0268555	0.184082	0.99994	key	key|target	0.71	TRUE	TRUE	TRUE	target	{'arrange': 0.71}
Semantic Hierarchies	hypernyms_misc	book is to notebook as picture is to	photo	picture	0.21	0	{'picture': 0.21, '______': 0.06, '__': 0.04, '"': 0.03, '____': 0.02}	35	0.00515747	0.199921	0.999651	key	key|target	0.71	TRUE	TRUE	TRUE	target	{'photo': 0.71}
Semantic Relations	antonyms_gradable	unfamiliar is to familiar as flat is to	lumpy	round	0.21	0	{'round': 0.21, 'curved': 0.06, 'sharp': 0.06, 'rounded': 0.03, 'what': 0.02}	1503	2.68221e-05	0.210911	0.985023	key	key|target	0.71	TRUE	TRUE	TRUE	target	{'lumpy': 0.71}
Verbal & Grammatical Forms	noun_plural_irreg	ability is to abilities as wife is to	wives	husband	0.21	0	{'husband': 0.21, 'husbands': 0.08, 'marriage': 0.06, '______': 0.06, 'women': 0.04}	8	0.0308838	0.18396	0.99992	key	key|target	0.71	TRUE	TRUE	TRUE	target	{'wives': 0.71}
Morphological Modifiers	re+verb_reg	connect is to reconnect as organize is to	reorganize	organize	0.2	0	{'organize': 0.2, 'dis': 0.06, '______': 0.05, '': 0.04, '__': 0.04}	7	0.0196533	0.178589	0.99993	key	key|target	0.71	TRUE	TRUE	TRUE	target	{'reorganize': 0.71}
Semantic Relations	antonyms_binary	anterior is to posterior as inverse is to	reverse	direct	0.2	0	{'direct': 0.2, '______': 0.06, '"': 0.06, '_____': 0.05, '': 0.04}	8	0.0211182	0.179077	0.99992	key	key|target	0.71	TRUE	TRUE	TRUE	target	{'reverse': 0.71}
Morphological Modifiers	over+adj_reg	crowded is to overcrowded as written is to	overwritten	written	0.19	0	{'written': 0.19, '______': 0.14, '__': 0.04, '_____': 0.04, '': 0.03}	45	0.00259399	0.190765	0.999552	key	key|target	0.71	TRUE	TRUE	TRUE	target	{'overwritten': 0.71}
Morphological Modifiers	over+adj_reg	exposed is to overexposed as saturated is to	oversaturated	des	0.19	0	{'des': 0.19, 'under': 0.09, 'unders': 0.08, '______': 0.06, 'uns': 0.06}	5	0.0422363	0.147217	0.99995	key	key|target	0.71	TRUE	TRUE	TRUE	target	{'oversaturated': 0.71}
Semantic Relations	animal_shelter	fox is to den as mole is to	hole	bur	0.19	0	{'bur': 0.19, '': 0.06, '_____': 0.06, 'hill': 0.06}	22	0.00576782	0.179779	0.999781	key	key|target	0.71	TRUE	TRUE	TRUE	target	{'hole': 0.71}
Semantic Relations	male_female	brother is to sister as waiter is to	waitress	what	0.19	0	{'what': 0.19, 'customer': 0.11, '______': 0.06, '_': 0.04, '?"': 0.04}	13	0.0163574	0.176025	0.99987	key	key|target	0.71	TRUE	TRUE	TRUE	target	{'waitress': 0.71}
Morphological Modifiers	over+adj_reg	overoptimistic is to optimistic as oversized is to	sized	:	0.18	0	{':': 0.07, '': 0.07, '?': 0.04}	43	0.00233459	0.177353	0.999572	key	key|target	0.71	TRUE	TRUE	TRUE	target	{'sized': 0.71}
Verbal & Grammatical Forms	present_participle	coding is to code as jumping is to	jump	walking	0.18	0	{'walking': 0.18, 'flying': 0.09, 'jumping': 0.07, 'running': 0.07, 'dancing': 0.03}	24	0.00485229	0.171906	0.999761	key	key|target	0.71	TRUE	TRUE	TRUE	target	{'jump': 0.71}
Semantic Relations	male_female	lioness is to lion as niece is to	nephew	uncle	0.17	0	{'uncle': 0.17, 'what': 0.07, '?': 0.06, ':': 0.05, '': 0.04}	10	0.0245361	0.145386	0.9999	key	key|target	0.71	TRUE	TRUE	TRUE	target	{'nephew': 0.71}
Semantic Relations	male_female	brother is to sister as superman is to	superwoman	what	0.16	0	{'what': 0.16, '______': 0.08, '__': 0.06, '?"': 0.04, '_____': 0.03}	10	0.0177002	0.145386	0.9999	key	key|target	0.71	TRUE	TRUE	TRUE	target	{'superwoman': 0.71}
Factual Knowledge	capital_world	Uruguay is to Montevideo as Canada is to	ottawa	______	0.15	0	{'______': 0.15, 'Toronto': 0.14, '__': 0.07, ':': 0.05, '_____': 0.04}	6	0.0306396	0.115845	0.99994	key	key|target	0.71	TRUE	TRUE	TRUE	target	{'ottawa': 0.71}
Semantic Hierarchies	hypernyms_misc	fruit is to plum as card is to	postcard	?	0.15	0	{'?': 0.05, '____': 0.06, '': 0.06, 'what': 0.06}	285	0.000131607	0.154165	0.99716	key	key|target	0.71	TRUE	TRUE	TRUE	target	{'postcard': 0.71}
Verbal & Grammatical Forms	noun_plural_reg	languages is to language as weeks is to	week	year	0.15	0	{'year': 0.15, 'time': 0.12, 'days': 0.1, 'day': 0.09, 'years': 0.06}	20	0.00527954	0.149017	0.999801	key	key|target	0.71	TRUE	TRUE	TRUE	target	{'week': 0.71}
Factual Knowledge	UK_city_county	wakefield is to yorkshire as wolverhampton is to	midlands	staff	0.14	0	{'staff': 0.14, 'the': 0.1, 'west': 0.07, 'wor': 0.04, 'war': 0.03}	2137	8.22544e-06	0.138664	0.978705	key	key|target	0.71	TRUE	TRUE	TRUE	target	{'midlands': 0.71}
Factual Knowledge	name_nationality	lenin is to Soviet as marx is to	german	communism	0.14	0	{'communism': 0.14, 'American': 0.07, 'Marxism': 0.05, 'communist': 0.05, 'mar': 0.05}	5	0.0427246	0.0969238	0.99995	key	key|target	0.71	TRUE	TRUE	TRUE	target	{'german': 0.71}
Morphological Modifiers	over+adj_reg	overshadowed is to shadowed as overzealous is to	zealous	?	0.14	0	{'?': 0.08, '': 0.1, ':': 0.1}	6	0.0427246	0.0979004	0.99994	key	key|target	0.71	TRUE	TRUE	TRUE	target	{'zealous': 0.71}
Morphological Modifiers	re+verb_reg	emerge is to reemerge as engage is to	reengage	engage	0.14	0	{'engage': 0.14, '__': 0.04, '': 0.03, 'dis': 0.04}	12	0.0110474	0.132507	0.99988	key	key|target	0.71	TRUE	TRUE	TRUE	target	{'reengage': 0.71}
Semantic Hierarchies	hypernyms_misc	fuel is to gasoline as pad is to	notepad	pencil	0.14	0	{'pencil': 0.14, 'pen': 0.1, 'paper': 0.08, '______': 0.03, 'pad': 0.02}	40	0.00228882	0.139313	0.999601	key	key|target	0.71	TRUE	TRUE	TRUE	target	{'notepad': 0.71}
Semantic Relations	male_female	bull is to cow as hero is to	heroine	______	0.14	0	{'______': 0.14, 'villain': 0.07, '__': 0.07, '_____': 0.05, '_': 0.04}	7	0.020752	0.11499	0.99993	key	key|target	0.71	TRUE	TRUE	TRUE	target	{'heroine': 0.71}
Morphological Modifiers	over+adj_reg	stated is to overstated as written is to	overwritten	written	0.13	0	{'written': 0.13, 'unw': 0.12, '______': 0.11, 'rewritten': 0.06, '_____': 0.04}	98	0.000900269	0.125076	0.999023	key	key|target	0.71	TRUE	TRUE	TRUE	target	{'overwritten': 0.71}
Semantic Hierarchies	hypernyms_misc	necklace is to jewelry as tub is to	container	bathroom	0.13	0	{'bathroom': 0.13, 'bath': 0.06, '': 0.05, '?': 0.05, '__': 0.05}	210	0.000235558	0.125741	0.997907	key	key|target	0.71	TRUE	TRUE	TRUE	target	{'container': 0.71}
Morphological Modifiers	over+adj_reg	compensated is to overcompensated as stretched is to	overstretched	what	0.12	0	{'what': 0.12, '______': 0.08, '?': 0.07, '': 0.05, ':': 0.03}	33	0.00494385	0.111267	0.999671	key	key|target	0.71	TRUE	TRUE	TRUE	target	{'overstretched': 0.71}
Semantic Hierarchies	hypernyms_misc	pin is to hairpin as cream is to	sunscreen	milk	0.12	0	{'milk': 0.12, '_': 0.07, 'coffee': 0.07, 'cake': 0.06, 'pie': 0.04}	1282	1.41859e-05	0.118638	0.987225	key	key|target	0.71	TRUE	TRUE	TRUE	target	{'sunscreen': 0.71}
Semantic Relations	male_female	duke is to duchess as mister is to	miss	?	0.12	0	{'?': 0.06, 'what': 0.1, '': 0.05}	14	0.0180664	0.103516	0.99986	key	key|target	0.71	TRUE	TRUE	TRUE	target	{'miss': 0.71}
Factual Knowledge	capital_world	Indonesia is to Jakarta as Nicaragua is to	managua	?	0.11	0	{'?': 0.11, '______': 0.09, '__': 0.07, '____': 0.07, '_____': 0.06}	6	0.0456543	0.0637207	0.99994	key	key|target	0.71	TRUE	TRUE	TRUE	target	{'managua': 0.71}
Morphological Modifiers	over+adj_reg	represented is to overrepresented as strained is to	overstrained	relaxed	0.11	0	{'relaxed': 0.11, 'strained': 0.11, 'stressed': 0.05, 'stretched': 0.04, 'tense': 0.04}	8	0.0136719	0.101074	0.99992	key	key|target	0.71	TRUE	TRUE	TRUE	target	{'overstrained': 0.71}
Semantic Hierarchies	hypernyms_misc	appliance is to fridge as jar is to	vase	?	0.11	0	{'?': 0.05, ':': 0.1, '': 0.09, 'what': 0.04}	437	4.86374e-05	0.111279	0.995645	key	key|target	0.71	TRUE	TRUE	TRUE	target	{'vase': 0.71}
Semantic Relations	animal_sound	fox is to howl as sheep is to	baa	ble	0.11	0	{'ble': 0.11, '______': 0.09, '_____': 0.08, '____': 0.04, '___': 0.04}	96	0.0010376	0.111267	0.999043	key	key|target	0.71	TRUE	TRUE	TRUE	target	{'baa': 0.71}
Semantic Relations	antonyms_gradable	solid is to gaseous as unwilling is to	willing	"	0.11	0	{'"': 0.11, '': 0.03, '______': 0.03, '”': 0.03}	5	0.0251465	0.0808105	0.99995	key	key|target	0.71	TRUE	TRUE	TRUE	target	{'willing': 0.71}
Semantic Relations	antonyms_binary	down is to up as southeast is to	southwest	"	0.11	0	{'"': 0.11, '': 0.04, '?': 0.09, ':': 0.06}	33	0.00543213	0.107361	0.999671	key	key|target	0.71	TRUE	TRUE	TRUE	target	{'southwest': 0.71}
Verbal & Grammatical Forms	noun_plural_irreg	industries is to industry as women is to	woman	______	0.11	0	{'______': 0.11, 'men': 0.09, '__': 0.08, '_____': 0.05, '____': 0.04}	146	0.000679016	0.113579	0.998545	key	key|target	0.71	TRUE	TRUE	TRUE	target	{'woman': 0.71}
Factual Knowledge	capital_world	Nicaragua is to Managua as Oman is to	muscat	?	0.1	0	{'?': 0.09, '': 0.07, 'what': 0.05, '____': 0.03}	17	0.0142212	0.0907593	0.999831	key	key|target	0.71	TRUE	TRUE	TRUE	target	{'muscat': 0.71}
Factual Knowledge	capital_world	Indonesia is to Jakarta as Mauritania is to	nouakchott	?	0.1	0	{'?': 0.1, '__': 0.08, ':': 0.05, '______': 0.04, 'what': 0.04}	10	0.0279541	0.0697021	0.9999	key	key|target	0.71	TRUE	TRUE	TRUE	target	{'nouakchott': 0.71}
Factual Knowledge	capital_world	Honduras is to Tegucigalpa as Liechtenstein is to	vaduz	__	0.1	0	{'__': 0.1, '______': 0.08, 'what': 0.07, '?': 0.05, ':': 0.05}	6	0.032959	0.0651855	0.99994	key	key|target	0.71	TRUE	TRUE	TRUE	target	{'vaduz': 0.71}
Morphological Modifiers	verb+er_irreg	bake is to baker as receive is to	receiver		0.1	0	{'': 0.06, '?': 0.06, ':': 0.04}	27	0.00701904	0.0901489	0.999731	key	key|target	0.71	TRUE	TRUE	TRUE	target	{'receiver': 0.71}
Semantic Hierarchies	hypernyms_misc	deodorant is to toiletry as vase is to	jar		0.1	0	{'': 0.05, '?': 0.07, ':': 0.04, '"': 0.03}	1031	1.56164e-05	0.0951992	0.989726	key	key|target	0.71	TRUE	TRUE	TRUE	target	{'jar': 0.71}
Semantic Hierarchies	hyponyms_misc	bunk is to bed as bracelet is to	jewelry	wrist	0.1	0	{'wrist': 0.1, '______': 0.07, '': 0.05, '__': 0.04, '_____': 0.03}	24	0.00946045	0.0891724	0.999761	key	key|target	0.71	TRUE	TRUE	TRUE	target	{'jewelry': 0.71}
Semantic Relations	animal_shelter	fly is to nest as trout is to	river	spawn	0.1	0	{'spawn': 0.1, 'swim': 0.09, 'stream': 0.07, 'water': 0.04, 'fish': 0.03}	7	0.0217285	0.0817871	0.99993	key	key|target	0.71	TRUE	TRUE	TRUE	target	{'river': 0.71}
Semantic Relations	animal_shelter	bear is to den as chimpanzee is to	grove	tree	0.1	0	{'tree': 0.1, '': 0.05, 'what': 0.09, '?': 0.06}	3743	2.5481e-06	0.0971654	0.962701	key	key|target	0.71	TRUE	TRUE	TRUE	target	{'grove': 0.71}
Semantic Relations	animal_shelter	bear is to den as woodchuck is to	hole	bur	0.1	0	{'bur': 0.1, '?': 0.08, '': 0.05, 'what': 0.05}	23	0.00897217	0.0877075	0.999771	key	key|target	0.71	TRUE	TRUE	TRUE	target	{'hole': 0.71}
Semantic Relations	antonyms_binary	behind is to ahead as southwest is to	southeast		0.1	0	{'': 0.05, '______': 0.07, '____': 0.04, 'northeast': 0.04}	25	0.00805664	0.0959473	0.999751	key	key|target	0.71	TRUE	TRUE	TRUE	target	{'southeast': 0.71}
Semantic Relations	male_female	lady is to gentleman as mare is to	stallion	______	0.1	0	{'______': 0.1, 'what': 0.08, '____': 0.08, '_____': 0.07, 'horse': 0.07}	6	0.0559082	0.0393066	0.99994	key	key|target	0.71	TRUE	TRUE	TRUE	target	{'stallion': 0.71}
Factual Knowledge	capital_world	Algeria is to Algiers as Kazakhstan is to	astana	?	0.09	0	{'?': 0.04, 'what': 0.08, '____': 0.05, ':': 0.04}	5	0.0395508	0.0493164	0.99995	key	key|target	0.71	TRUE	TRUE	TRUE	target	{'astana': 0.71}
Factual Knowledge	capital_world	Sweden is to Stockholm as Thailand is to	bangkok	what	0.09	0	{'what': 0.09, '______': 0.09, '_____': 0.07, '__': 0.06, '?': 0.06}	6	0.0461426	0.0397949	0.99994	key	key|target	0.71	TRUE	TRUE	TRUE	target	{'bangkok': 0.71}
Morphological Modifiers	verb+tion_irreg	compilation is to compile as imagination is to	imagine	dream	0.09	0	{'dream': 0.09, 'reality': 0.08, 'dreaming': 0.04, 'creation': 0.03, 'the': 0.03}	24	0.00817871	0.085083	0.999761	key	key|target	0.71	TRUE	TRUE	TRUE	target	{'imagine': 0.71}
Morphological Modifiers	verb+tion_irreg	computation is to compute as visualization is to	visualize	see	0.09	0	{'see': 0.09, 'seeing': 0.08, 'perception': 0.06, 'look': 0.04, 'imagine': 0.02}	53	0.00314331	0.0827942	0.999472	key	key|target	0.71	TRUE	TRUE	TRUE	target	{'visualize': 0.71}
Morphological Modifiers	verb+tion_irreg	prepare is to preparation as utilize is to	utilization		0.09	0	{'': 0.09, '______': 0.07, 'what': 0.03, '__': 0.03}	6	0.0327148	0.0561523	0.99994	key	key|target	0.71	TRUE	TRUE	TRUE	target	{'utilization': 0.71}
Morphological Modifiers	noun+less_reg	ego is to egoless as wit is to	witless	______	0.09	0	{'______': 0.09, '____': 0.05, '__': 0.04, '_____': 0.04, 'humor': 0.04}	8	0.0255127	0.0633545	0.99992	key	key|target	0.71	TRUE	TRUE	TRUE	target	{'witless': 0.71}
Morphological Modifiers	over+adj_reg	protected is to overprotected as sized is to	oversized	______	0.09	0	{'______': 0.09, '': 0.05, '?': 0.05, 'what': 0.03}	7	0.0251465	0.0622559	0.99993	key	key|target	0.71	TRUE	TRUE	TRUE	target	{'oversized': 0.71}
Semantic Hierarchies	hypernyms_misc	dessert is to cake as card is to	postcard	____	0.09	0	{'____': 0.09, '"': 0.07, '___': 0.04, 'a': 0.04, 'what': 0.03}	81	0.001297	0.0870819	0.999193	key	key|target	0.71	TRUE	TRUE	TRUE	target	{'postcard': 0.71}
Semantic Relations	animal_shelter	fox is to den as hippopotamus is to	river		0.09	0	{'': 0.08, '?': 0.06, '_____': 0.05, ':': 0.05}	5	0.0439453	0.0493164	0.99995	key	key|target	0.71	TRUE	TRUE	TRUE	target	{'river': 0.71}
Semantic Relations	animal_shelter	crocodile is to river as rat is to	nest		0.09	0	{'': 0.05, 'sewer': 0.09, 'city': 0.05, '_____': 0.05}	86	0.0015564	0.0917053	0.999143	key	key|target	0.71	TRUE	TRUE	TRUE	target	{'nest': 0.71}
Semantic Relations	antonyms_gradable	bright is to pale as sane is to	crazy	______	0.09	0	{'______': 0.09, '_____': 0.08, 'insane': 0.06, '': 0.03}	9	0.0222168	0.0656738	0.99991	key	key|target	0.71	TRUE	TRUE	TRUE	target	{'crazy': 0.71}
Morphological Modifiers	over+adj_reg	optimistic is to overoptimistic as stretched is to	overstretched	______	0.08	0	{'______': 0.08, '?': 0.06, 'what': 0.06, '': 0.06, '...': 0.05}	17	0.0111694	0.0664673	0.999831	key	key|target	0.71	TRUE	TRUE	TRUE	target	{'overstretched': 0.71}
Morphological Modifiers	noun+less_reg	child is to childless as expression is to	expressionless	______	0.08	0	{'______': 0.08, '__': 0.04, '': 0.02, '____': 0.02}	18	0.00964355	0.06604	0.999821	key	key|target	0.71	TRUE	TRUE	TRUE	target	{'expressionless': 0.71}
Morphological Modifiers	over+adj_reg	spent is to overspent as stretched is to	overstretched	______	0.08	0	{'______': 0.08, 'stretched': 0.08, '?': 0.05, 'what': 0.05, '': 0.05}	23	0.00860596	0.072937	0.999771	key	key|target	0.71	TRUE	TRUE	TRUE	target	{'overstretched': 0.71}
Morphological Modifiers	re+verb_reg	deem is to redeem as upload is to	reupload	download	0.08	0	{'download': 0.08, '': 0.06, '______': 0.05, '?': 0.05, '__': 0.05}	151	0.000492096	0.0771446	0.998495	key	key|target	0.71	TRUE	TRUE	TRUE	target	{'reupload': 0.71}
Morphological Modifiers	verb+er_irreg	baker is to bake as destroyer is to	destroy	______	0.08	0	{'______': 0.08, '?': 0.06, '': 0.04, '_____': 0.03, 'a': 0.03}	9	0.0306396	0.0523682	0.99991	key	key|target	0.71	TRUE	TRUE	TRUE	target	{'destroy': 0.71}
Semantic Hierarchies	hypernyms_misc	computer is to device as perfume is to	toiletry	col	0.08	0	{'col': 0.08, '______': 0.06, 'fragrance': 0.05, 'perfume': 0.05, '__': 0.04}	18	0.0098877	0.067749	0.999821	key	key|target	0.71	TRUE	TRUE	TRUE	target	{'toiletry': 0.71}
Semantic Hierarchies	hypernyms_misc	appliance is to dishwasher as pin is to	hairpin	______	0.08	0	{'______': 0.08, '____': 0.07, 'hammer': 0.06, '_____': 0.04, '': 0.04}	230	0.000247955	0.0798302	0.997708	key	key|target	0.71	TRUE	TRUE	TRUE	target	{'hairpin': 0.71}
Semantic Relations	animal_sound	frog is to ribbit as seal is to	bark	?	0.08	0	{'?': 0.05, '': 0.06, ':': 0.05}	5	0.0432129	0.0373535	0.99995	key	key|target	0.71	TRUE	TRUE	TRUE	target	{'bark': 0.71}
Semantic Relations	antonyms_gradable	full is to empty as tasty is to	tasteless		0.08	0	{'': 0.04, '?': 0.08, ':': 0.04, '"': 0.04}	62	0.00219727	0.0803223	0.999382	key	key|target	0.71	TRUE	TRUE	TRUE	target	{'tasteless': 0.71}
Verbal & Grammatical Forms	verb_inf_Ving	avoid is to avoiding as receive is to	receiving	received	0.08	0	{'received': 0.08, '': 0.03, 'giving': 0.04, '______': 0.04}	6	0.0303955	0.0472412	0.99994	key	key|target	0.71	TRUE	TRUE	TRUE	target	{'receiving': 0.71}
Morphological Modifiers	over+adj_reg	compensated is to overcompensated as stimulated is to	overstimulated	______	0.07	0	{'______': 0.07, '?': 0.04, '': 0.04, 'what': 0.04, '__': 0.03}	7	0.0214844	0.0493164	0.99993	key	key|target	0.71	TRUE	TRUE	TRUE	target	{'overstimulated': 0.71}
Morphological Modifiers	superlative	young is to youngest as tasty is to	tastiest	______	0.07	0	{'______': 0.07, '__': 0.04, '_____': 0.03, 'tasty': 0.03, '"': 0.03}	5	0.02771	0.0430908	0.99995	key	key|target	0.71	TRUE	TRUE	TRUE	target	{'tastiest': 0.71, 'tasteless': 0.11}
Semantic Relations	animal_shelter	baboon is to grove as hippopotamus is to	river		0.07	0	{'': 0.06, '?': 0.05, '______': 0.05, '_____': 0.04}	11	0.0216064	0.0491943	0.99989	key	key|target	0.71	TRUE	TRUE	TRUE	target	{'river': 0.71}
Semantic Relations	opposite	tasteful is to distasteful as aware is to	unaware	______	0.07	0	{'______': 0.07, '"': 0.05, '_____': 0.04, '____': 0.04, '_': 0.04}	50	0.00357056	0.0657654	0.999502	key	key|target	0.71	TRUE	TRUE	TRUE	target	{'unaware': 0.71}
Semantic Relations	family	prince is to princess as grandpa is to	grandma	what	0.07	0	{'what': 0.07, '______': 0.06, '__': 0.06, '?': 0.05, ':': 0.05}	5	0.0471191	0.0212402	0.99995	key	key|target	0.71	TRUE	TRUE	TRUE	target	{'grandma': 0.71}
Semantic Relations	animal_sound	laugh is to hyena as chirrup is to	songbird		0.07	0	{'': 0.05, '______': 0.05, ':': 0.03, 'a': 0.03}	116	0.000957489	0.0664253	0.998844	key	key|target	0.71	TRUE	TRUE	TRUE	target	{'songbird': 0.71}
Verbal & Grammatical Forms	past_tense	swimming is to swam as describing is to	described		0.07	0	{'': 0.07, 'what': 0.06, 'a': 0.05, '______': 0.04}	86	0.00132751	0.0733795	0.999143	key	key|target	0.71	TRUE	TRUE	TRUE	target	{'described': 0.71, 'describes': 0.1}
Verbal & Grammatical Forms	noun_plural_reg	car is to cars as government is to	governments	people	0.07	0	{'people': 0.07, 'society': 0.07, 'the': 0.06, 'countries': 0.06, '__': 0.05}	6	0.0290527	0.0427246	0.99994	key	key|target	0.71	TRUE	TRUE	TRUE	target	{'governments': 0.71}
Morphological Modifiers	verb+tion_irreg	compilation is to compile as exploration is to	explore	travel	0.06	0	{'travel': 0.06, 'exploit': 0.04, 'play': 0.04, 'survey': 0.03, 'plan': 0.03}	20	0.00909424	0.0504761	0.999801	key	key|target	0.71	TRUE	TRUE	TRUE	target	{'explore': 0.71}
Morphological Modifiers	superlative	short is to shortest as tasty is to	tastiest	"	0.06	0	{'"': 0.06, '______': 0.06, '?': 0.04, '?"': 0.04, '': 0.03}	29	0.00964355	0.0533447	0.999711	key	key|target	0.71	TRUE	TRUE	TRUE	target	{'tastiest': 0.71, 'tasteless': 0.11}
Morphological Modifiers	over+adj_reg	filled is to overfilled as written is to	overwritten	written	0.06	0	{'written': 0.06, '______': 0.06, 'typed': 0.05, 'unread': 0.04, '': 0.04}	39	0.00376892	0.0587311	0.999611	key	key|target	0.71	TRUE	TRUE	TRUE	target	{'overwritten': 0.71}
Morphological Modifiers	over+adj_reg	filled is to overfilled as qualified is to	overqualified	______	0.06	0	{'______': 0.06, '?': 0.06, '': 0.06, ':': 0.05, 'A': 0.04}	35	0.00358582	0.0598907	0.999651	key	key|target	0.71	TRUE	TRUE	TRUE	target	{'overqualified': 0.71}
Semantic Hierarchies	hypernyms_misc	hamburger is to sandwich as vase is to	jar	?	0.06	0	{'?': 0.06, 'flower': 0.05, '': 0.05, '______': 0.04, '____': 0.04}	120	0.000892639	0.0559921	0.998804	key	key|target	0.71	TRUE	TRUE	TRUE	target	{'jar': 0.71}
Semantic Hierarchies	hypernyms_misc	appliance is to fridge as picture is to	photo	______	0.06	0	{'______': 0.06, '?': 0.06, '': 0.05, 'canvas': 0.03, 'frame': 0.03}	68	0.00195312	0.059082	0.999322	key	key|target	0.71	TRUE	TRUE	TRUE	target	{'photo': 0.71}
Semantic Relations	animal_sound	dog is to bark as fox is to	howl	_____	0.06	0	{'_____': 0.06, '______': 0.04, 'what': 0.04, ':': 0.03, '': 0.03}	5	0.0349121	0.0300293	0.99995	key	key|target	0.71	TRUE	TRUE	TRUE	target	{'howl': 0.71}
Semantic Hierarchies	hypernyms_misc	picture is to photo as jar is to	vase	:	0.05	0	{':': 0.05, 'jar': 0.05, '': 0.04, 'container': 0.04, '?': 0.04}	140	0.000591278	0.0543404	0.998605	key	key|target	0.71	TRUE	TRUE	TRUE	target	{'vase': 0.71}
Semantic Relations	antonyms_binary	behind is to ahead as dismiss is to	employ		0.05	0	{'': 0.05, '____': 0.05, 'admit': 0.04, '______': 0.04, '_____': 0.03}	97	0.00136566	0.0530777	0.999033	key	key|target	0.71	TRUE	TRUE	TRUE	target	{'employ': 0.71}
Semantic Relations	antonyms_binary	dead is to alive as proceed is to	retreat	______	0.05	0	{'______': 0.05, '__': 0.04, '_____': 0.04, '': 0.03, 'what': 0.02}	33	0.00665283	0.0424194	0.999671	key	key|target	0.71	TRUE	TRUE	TRUE	target	{'retreat': 0.71}
Semantic Relations	antonyms_gradable	dangerous is to safe as decisive is to	hesitating	______	0.05	0	{'______': 0.05, 'hesitant': 0.05, 'cautious': 0.03, 'uncertain': 0.03, 'inde': 0.02}	45	0.0043335	0.0422974	0.999552	key	key|target	0.71	TRUE	TRUE	TRUE	target	{'hesitating': 0.71}
Morphological Modifiers	verb+tion_irreg	customization is to customize as observation is to	observe	experiment	0.04	0	{'experiment': 0.04, 'perception': 0.04, '': 0.03, 'see': 0.03, 'observation': 0.03}	20	0.00714111	0.0368042	0.999801	key	key|target	0.71	TRUE	TRUE	TRUE	target	{'observe': 0.71}
Verbal & Grammatical Forms	noun_plural_irreg	categories is to category as series is to	series	sequence	0.28	0	{'sequence': 0.28, 'number': 0.23, 'set': 0.11, 'category': 0.04, 'sum': 0.03}	39	0.00164032	0.27375	0.999611	original	target	0.7	TRUE	TRUE	TRUE	target	{'series': 0.7}
Semantic Relations	antonyms_binary	first is to last as outward is to	upward	inward	0.82	0	{'inward': 0.82, 'inner': 0.08, 'within': 0.02, 'in': 0.01, 'hidden': 0.0}	22	0.000484467	0.823734	0.999781	key	key|target	0.7	TRUE	TRUE	TRUE	target	{'upward': 0.7}
Morphological Modifiers	re+verb_reg	cognize is to recognize as distribute is to	redistribute	distribute	0.68	0	{'distribute': 0.68, 'divide': 0.03, 'dis': 0.02, 'allocate': 0.01, '': 0.01}	15	0.00325012	0.676437	0.999851	key	key|target	0.7	TRUE	TRUE	TRUE	target	{'redistribute': 0.7}
Morphological Modifiers	re+verb_reg	connect is to reconnect as introduce is to	reintroduce	introduce	0.57	0	{'introduce': 0.57, 'present': 0.1, 'introdu': 0.01, 'introduction': 0.01, '': 0.01}	5	0.010376	0.55603	0.99995	key	key|target	0.7	TRUE	TRUE	TRUE	target	{'reintroduce': 0.7}
Morphological Modifiers	adj+ness_reg	preparedness is to prepared as weakness is to	weak	strength	0.55	0	{'strength': 0.55, 'strong': 0.12, 'weakness': 0.03, '______': 0.03, 'power': 0.02}	6	0.00793457	0.546753	0.99994	key	key|target	0.7	TRUE	TRUE	TRUE	target	{'weak': 0.7}
Verbal & Grammatical Forms	noun_plural_irreg	authority is to authorities as society is to	societies	individuals	0.48	0	{'individuals': 0.48, 'the': 0.1, 'society': 0.07, 'social': 0.02, 'individual': 0.02}	6	0.0184326	0.45813	0.99994	key	key|target	0.7	TRUE	TRUE	TRUE	target	{'societies': 0.7}
Morphological Modifiers	re+verb_reg	emerge is to reemerge as occur is to	reoccur	occur	0.47	0	{'occur': 0.47, 'happen': 0.2, 'come': 0.05, 'recur': 0.03, 'take': 0.03}	13	0.00318909	0.469467	0.99987	key	key|target	0.7	TRUE	TRUE	TRUE	target	{'reoccur': 0.7}
Semantic Relations	antonyms_binary	exterior is to interior as upward is to	outward	downward	0.47	0	{'downward': 0.47, 'down': 0.05, '______': 0.04, '"': 0.04, 'inward': 0.03}	22	0.00415039	0.462646	0.999781	key	key|target	0.7	TRUE	TRUE	TRUE	target	{'outward': 0.7}
Semantic Relations	animal_shelter	crocodile is to river as tiger is to	den	jungle	0.37	0	{'jungle': 0.37, 'forest': 0.2, '?': 0.03, '': 0.03, '______': 0.02}	183	0.000183105	0.368958	0.998176	key	key|target	0.7	TRUE	TRUE	TRUE	target	{'den': 0.7}
Semantic Relations	antonyms_gradable	short is to long as silent is to	noisy	loud	0.35	0	{'loud': 0.35, 'deaf': 0.05, 'audible': 0.03, 'what': 0.03, '': 0.03}	17	0.00772095	0.341888	0.999831	key	key|target	0.7	TRUE	TRUE	TRUE	target	{'noisy': 0.7}
Factual Knowledge	country_capital	Kenya is to Nairobi as Georgia is to	tbilisi	Atlanta	0.28	0	{'Atlanta': 0.28, '______': 0.06, ':': 0.05, '__': 0.04}	334	5.93662e-05	0.283144	0.996672	key	key|target	0.7	TRUE	TRUE	TRUE	target	{'tbilisi': 0.7}
Factual Knowledge	capital_world	Kenya is to Nairobi as Georgia is to	tbilisi	Atlanta	0.28	0	{'Atlanta': 0.28, '______': 0.06, ':': 0.05, '__': 0.04}	334	5.93662e-05	0.283144	0.996672	key	key|target	0.7	TRUE	TRUE	TRUE	target	{'tbilisi': 0.7}
Morphological Modifiers	re+verb_reg	deem is to redeem as publish is to	republish	publish	0.28	0	{'publish': 0.28, '______': 0.05, '__': 0.04, '?': 0.04, '': 0.04}	22	0.00585938	0.277344	0.999781	key	key|target	0.7	TRUE	TRUE	TRUE	target	{'republish': 0.7}
Morphological Modifiers	re+verb_reg	arrange is to rearrange as distribute is to	redistribute	distribute	0.28	0	{'distribute': 0.28, 'divide': 0.06, '': 0.06, '?': 0.03, '__': 0.03}	45	0.00244141	0.280762	0.999552	key	key|target	0.7	TRUE	TRUE	TRUE	target	{'redistribute': 0.7}
Semantic Relations	antonyms_gradable	scarce is to abundant as flat is to	lumpy	round	0.28	0	{'round': 0.28, 'curved': 0.1, 'cur': 0.07, 'sharp': 0.04, 'b': 0.03}	1280	1.83582e-05	0.277325	0.987245	key	key|target	0.7	TRUE	TRUE	TRUE	target	{'lumpy': 0.7}
Morphological Modifiers	noun+less_reg	sensor is to sensorless as wit is to	witless	wisdom	0.27	0	{'wisdom': 0.27, 'intelligence': 0.13, 'humor': 0.05, 'intellect': 0.02, 'wis': 0.02}	6	0.0183105	0.251221	0.99994	key	key|target	0.7	TRUE	TRUE	TRUE	target	{'witless': 0.7}
Factual Knowledge	capital_world	Liberia is to Monrovia as Georgia is to	tbilisi	Atlanta	0.26	0	{'Atlanta': 0.26, '______': 0.12, '__': 0.11, '?': 0.02, '____': 0.02}	577	2.20537e-05	0.259744	0.99425	key	key|target	0.7	TRUE	TRUE	TRUE	target	{'tbilisi': 0.7}
Morphological Modifiers	re+verb_reg	define is to redefine as engage is to	reengage	engage	0.24	0	{'engage': 0.24, 'ent': 0.05, 'pledge': 0.05, 'eng': 0.04, 'commit': 0.03}	20	0.0055542	0.230774	0.999801	key	key|target	0.7	TRUE	TRUE	TRUE	target	{'reengage': 0.7}
Semantic Relations	animal_shelter	wolf is to den as woodchuck is to	hole	bur	0.23	0	{'bur': 0.23, '': 0.06, '?': 0.05}	22	0.00854492	0.22583	0.999781	key	key|target	0.7	TRUE	TRUE	TRUE	target	{'hole': 0.7}
Morphological Modifiers	superlative	wide is to widest as quick is to	quickest	slow	0.22	0	{'slow': 0.22, 'fastest': 0.06, '______': 0.05, 'what': 0.04, '': 0.04}	5	0.0405273	0.179199	0.99995	key	key|target	0.7	TRUE	TRUE	TRUE	target	{'quickest': 0.7}
Semantic Hierarchies	hypernyms_misc	lotion is to toiletry as vase is to	jar		0.22	0	{'': 0.06, '?': 0.11, '<|endoftext|>': 0.03, '_': 0.03}	865	1.51396e-05	0.219711	0.99138	key	key|target	0.7	TRUE	TRUE	TRUE	target	{'jar': 0.7}
Morphological Modifiers	re+verb_reg	examine is to reexamine as send is to	resend	send	0.21	0	{'send': 0.21, 'sent': 0.13, 'receive': 0.05, '?': 0.04, 'dispatch': 0.03}	10	0.0145264	0.199341	0.9999	key	key|target	0.7	TRUE	TRUE	TRUE	target	{'resend': 0.7}
Morphological Modifiers	re+verb_reg	consider is to reconsider as send is to	resend	sent	0.21	0	{'sent': 0.21, 'send': 0.14, 'receive': 0.08, 'received': 0.03, 'be': 0.03}	47	0.00184631	0.205185	0.999532	key	key|target	0.7	TRUE	TRUE	TRUE	target	{'resend': 0.7}
Semantic Relations	antonyms_gradable	full is to empty as sane is to	crazy	insane	0.2	0	{'insane': 0.2, '': 0.03, '______': 0.05, '_____': 0.04}	5	0.0294189	0.174683	0.99995	key	key|target	0.7	TRUE	TRUE	TRUE	target	{'crazy': 0.7}
Morphological Modifiers	noun+less_reg	friend is to friendless as heart is to	heartless	?	0.19	0	{'?': 0.04, '': 0.03}	7	0.02771	0.158813	0.99993	key	key|target	0.7	TRUE	TRUE	TRUE	target	{'heartless': 0.7}
Morphological Modifiers	adj+ly_reg	additionally is to additional as legally is to	legal	legally	0.19	0	{'legally': 0.19, 'illegally': 0.1, 'law': 0.07, '': 0.03}	17	0.00619507	0.186188	0.999831	key	key|target	0.7	TRUE	TRUE	TRUE	target	{'legal': 0.7}
Morphological Modifiers	adj+ly_reg	typically is to typical as visually is to	visual	visually	0.18	0	{'visually': 0.18, '______': 0.08, '': 0.04, '_____': 0.04, '"': 0.03}	14	0.0116577	0.170959	0.99986	key	key|target	0.7	TRUE	TRUE	TRUE	target	{'visual': 0.7}
Semantic Hierarchies	hypernyms_misc	dress is to clothes as notepad is to	pad	paper	0.17	0	{'paper': 0.17, '?': 0.05, '____': 0.03, 'computer': 0.03, '': 0.03}	63	0.00202942	0.169846	0.999372	key	key|target	0.7	TRUE	TRUE	TRUE	target	{'pad': 0.7}
Verbal & Grammatical Forms	verb_Ving_Ved	attended is to attending as introduced is to	introducing	introduced	0.17	0	{'introduced': 0.17, '______': 0.07, '__': 0.05, '?': 0.04, '': 0.04}	13	0.013916	0.156006	0.99987	key	key|target	0.7	TRUE	TRUE	TRUE	target	{'introducing': 0.7}
Morphological Modifiers	adj+ly_reg	additionally is to additional as visually is to	visual	visually	0.16	0	{'visually': 0.16, '______': 0.06, '__': 0.03, '': 0.03, '_____': 0.02}	28	0.0050354	0.152191	0.999721	key	key|target	0.7	TRUE	TRUE	TRUE	target	{'visual': 0.7}
Semantic Relations	antonyms_binary	out is to in as proceed is to	retreat		0.16	0	{'': 0.04, '?': 0.03, '______': 0.02}	88	0.00128174	0.156921	0.999123	key	key|target	0.7	TRUE	TRUE	TRUE	target	{'retreat': 0.7}
Morphological Modifiers	un+adj_reg	controlled is to uncontrolled as forgettable is to	unforgettable	______	0.15	0	{'______': 0.15, ':': 0.07, '': 0.07, 'forget': 0.06, '__': 0.05}	7	0.0317383	0.119629	0.99993	key	key|target	0.7	TRUE	TRUE	TRUE	target	{'unforgettable': 0.7}
Morphological Modifiers	over+adj_reg	protected is to overprotected as qualified is to	overqualified	______	0.14	0	{'______': 0.14, 'un': 0.09, '': 0.05, '__': 0.04, ':': 0.04}	36	0.00384521	0.140686	0.999641	key	key|target	0.7	TRUE	TRUE	TRUE	target	{'overqualified': 0.7}
Semantic Hierarchies	hypernyms_misc	toiletry is to deodorant as brush is to	toothbrush		0.14	0	{'': 0.05, '?': 0.06, 'paint': 0.05}	9	0.0234375	0.120117	0.99991	key	key|target	0.7	TRUE	TRUE	TRUE	target	{'toothbrush': 0.7}
Semantic Relations	animal_sound	dog is to bark as monkey is to	chatter	climb	0.14	0	{'climb': 0.14, 'what': 0.11, 'swing': 0.06, '______': 0.05, '_____': 0.04}	48	0.00257874	0.138046	0.999522	key	key|target	0.7	TRUE	TRUE	TRUE	target	{'chatter': 0.7}
Semantic Relations	male_female	lady is to gentleman as niece is to	nephew	uncle	0.14	0	{'uncle': 0.14, '': 0.07, '?': 0.06, 'what': 0.06, ':': 0.06}	17	0.0114746	0.124268	0.999831	key	key|target	0.7	TRUE	TRUE	TRUE	target	{'nephew': 0.7}
Factual Knowledge	capital_world	Kenya is to Nairobi as Ecuador is to	quito	______	0.13	0	{'______': 0.13, ':': 0.05, '__': 0.08, '_____': 0.06}	1131	6.3777e-06	0.130853	0.98873	key	key|target	0.7	TRUE	TRUE	TRUE	target	{'quito': 0.7}
Morphological Modifiers	superlative	long is to longest as fast is to	fastest	slow	0.13	0	{'slow': 0.13, '?': 0.12, '': 0.05, ':': 0.04}	9	0.0257568	0.105103	0.99991	key	key|target	0.7	TRUE	TRUE	TRUE	target	{'fastest': 0.7}
Morphological Modifiers	over+adj_reg	populated is to overpopulated as subscribed is to	oversubscribed	______	0.13	0	{'______': 0.13, 'subscribed': 0.08, 'unsub': 0.04, '_____': 0.04, '__': 0.04}	8	0.0267334	0.101196	0.99992	key	key|target	0.7	TRUE	TRUE	TRUE	target	{'oversubscribed': 0.7}
Verbal & Grammatical Forms	noun_plural_irreg	category is to categories as memory is to	memories	computers	0.13	0	{'computers': 0.13, 'the': 0.11, 'consciousness': 0.05, 'a': 0.04, 'brains': 0.03}	194	0.000356674	0.126596	0.998067	key	key|target	0.7	TRUE	TRUE	TRUE	target	{'memories': 0.7}
Morphological Modifiers	over+adj_reg	represented is to overrepresented as stimulated is to	overstimulated	inhibited	0.12	0	{'inhibited': 0.12, 'suppressed': 0.1, 'depressed': 0.06, 'stimulated': 0.04, 'un': 0.04}	20	0.00750732	0.110168	0.999801	key	key|target	0.7	TRUE	TRUE	TRUE	target	{'overstimulated': 0.7}
Semantic Hierarchies	hypernyms_misc	jacket is to clothes as tv is to	device	?	0.12	0	{'?': 0.04, 'entertainment': 0.07, '': 0.07}	274	0.000149727	0.119967	0.99727	key	key|target	0.7	TRUE	TRUE	TRUE	target	{'device': 0.7}
Semantic Hierarchies	hyponyms_misc	ferry is to boat as lemon is to	citrus	fruit	0.12	0	{'fruit': 0.12, '': 0.05, ':': 0.05}	12	0.0177002	0.0975342	0.99988	key	key|target	0.7	TRUE	TRUE	TRUE	target	{'citrus': 0.7}
Semantic Relations	animal_sound	mouse is to squeak as sheep is to	baa	______	0.12	0	{'______': 0.12, '_____': 0.09, 'ble': 0.06, '___': 0.06, '____': 0.05}	131	0.000644684	0.118496	0.998695	key	key|target	0.7	TRUE	TRUE	TRUE	target	{'baa': 0.7}
Semantic Relations	male_female	businessman is to businesswoman as murderer is to	murderess	murderer	0.12	0	{'murderer': 0.12, '______': 0.07, '__': 0.06, 'what': 0.04, 'victim': 0.04}	5	0.0378418	0.0866699	0.99995	key	key|target	0.7	TRUE	TRUE	TRUE	target	{'murderess': 0.7}
Verbal & Grammatical Forms	noun_plural_reg	versions is to version as years is to	year	years	0.12	0	{'years': 0.12, 'ages': 0.12, 'age': 0.1, 'centuries': 0.07, 'decades': 0.05}	47	0.00233459	0.113388	0.999532	key	key|target	0.7	TRUE	TRUE	TRUE	target	{'year': 0.7}
Factual Knowledge	capital_world	Taiwan is to Taipei as Liechtenstein is to	vaduz	__	0.11	0	{'__': 0.11, '______': 0.1, '___': 0.06, '____': 0.05, 'what': 0.05}	6	0.0410156	0.0703125	0.99994	key	key|target	0.7	TRUE	TRUE	TRUE	target	{'vaduz': 0.7}
Morphological Modifiers	over+adj_reg	arching is to overarching as simplified is to	oversimplified	______	0.11	0	{'______': 0.11, 'complex': 0.09, 'simplified': 0.08, '?': 0.06, '': 0.05}	39	0.00271606	0.1091	0.999611	key	key|target	0.7	TRUE	TRUE	TRUE	target	{'oversimplified': 0.7}
Morphological Modifiers	over+adj_reg	overpowered is to powered as overzealous is to	zealous	:	0.11	0	{':': 0.11, '': 0.05, '"': 0.07, '?': 0.04}	14	0.0159912	0.0982666	0.99986	key	key|target	0.7	TRUE	TRUE	TRUE	target	{'zealous': 0.7}
Morphological Modifiers	verb+er_irreg	defend is to defender as lose is to	loser	win	0.11	0	{'win': 0.11, '': 0.03, '?': 0.06, '______': 0.05}	39	0.00439453	0.102051	0.999611	key	key|target	0.7	TRUE	TRUE	TRUE	target	{'loser': 0.7}
Semantic Hierarchies	hypernyms_misc	deodorant is to toiletry as dress is to	clothes	clothing	0.11	0	{'clothing': 0.11, 'garment': 0.05, '______': 0.04, 'wardrobe': 0.04, 'fashion': 0.04}	13	0.0163574	0.0969238	0.99987	key	key|target	0.7	TRUE	TRUE	TRUE	target	{'clothes': 0.7}
Semantic Relations	antonyms_binary	ahead is to behind as proceed is to	retreat		0.11	0	{'': 0.05, '______': 0.05, '?': 0.04, '_____': 0.04}	29	0.00686646	0.100555	0.999711	key	key|target	0.7	TRUE	TRUE	TRUE	target	{'retreat': 0.7}
Semantic Relations	male_female	sow is to boar as stepmother is to	stepfather	father	0.11	0	{'father': 0.11, '______': 0.07, 'what': 0.06, '__': 0.06, '_': 0.05}	5	0.0412598	0.0710449	0.99995	key	key|target	0.7	TRUE	TRUE	TRUE	target	{'stepfather': 0.7}
Semantic Relations	male_female	princess is to prince as madam is to	sir	gentleman	0.11	0	{'gentleman': 0.11, 'what': 0.06, '_': 0.05, '': 0.04, '______': 0.04}	58	0.00201416	0.104919	0.999422	key	key|target	0.7	TRUE	TRUE	TRUE	target	{'sir': 0.7}
Factual Knowledge	capital_world	Uruguay is to Montevideo as Mauritania is to	nouakchott	"	0.1	0	{'"': 0.07, '__': 0.06, '______': 0.04, ':': 0.04}	5	0.0390625	0.0639648	0.99995	key	key|target	0.7	TRUE	TRUE	TRUE	target	{'nouakchott': 0.7}
Morphological Modifiers	verb+able_reg	contain is to containable as perform is to	performable		0.1	0	{'': 0.08, '"': 0.06, '?': 0.04, ':': 0.04}	5	0.0303955	0.0692139	0.99995	key	key|target	0.7	TRUE	TRUE	TRUE	target	{'performable': 0.7}
Morphological Modifiers	noun+less_reg	guiltless is to guilt as penniless is to	penny	______	0.1	0	{'______': 0.1, 'money': 0.07, '____': 0.07, '__': 0.06, '_____': 0.06}	9	0.022583	0.0784912	0.99991	key	key|target	0.7	TRUE	TRUE	TRUE	target	{'penny': 0.7}
Semantic Hierarchies	hypernyms_misc	appliance is to dishwasher as sandwich is to	hamburger	?	0.1	0	{'?': 0.1, 'toaster': 0.1, ':': 0.06, '______': 0.05, '': 0.05}	178	0.000293732	0.101269	0.998226	key	key|target	0.7	TRUE	TRUE	TRUE	target	{'hamburger': 0.7}
Semantic Relations	animal_shelter	baboon is to grove as termite is to	hill	_____	0.1	0	{'_____': 0.1, '______': 0.09, '': 0.05, '__': 0.04}	19	0.0103149	0.0873413	0.999811	key	key|target	0.7	TRUE	TRUE	TRUE	target	{'hill': 0.7}
Semantic Relations	animal_sound	neigh is to horse as baa is to	sheep	_____	0.1	0	{'_____': 0.1, '______': 0.07, '____': 0.07, '?': 0.05, '': 0.05}	6	0.0424805	0.0532227	0.99994	key	key|target	0.7	TRUE	TRUE	TRUE	target	{'sheep': 0.7}
Semantic Relations	antonyms_gradable	dirty is to clean as flat is to	lumpy	what	0.1	0	{'what': 0.1, 'round': 0.07, 'curved': 0.06, 'b': 0.04, '_____': 0.03}	1360	1.62125e-05	0.10057	0.986448	key	key|target	0.7	TRUE	TRUE	TRUE	target	{'lumpy': 0.7}
Morphological Modifiers	over+adj_reg	overcompensated is to compensated as overzealous is to	zealous	:	0.09	0	{':': 0.09, '"': 0.08, '': 0.06, '?': 0.05}	11	0.0198975	0.0665283	0.99989	key	key|target	0.7	TRUE	TRUE	TRUE	target	{'zealous': 0.7}
Morphological Modifiers	over+adj_reg	played is to overplayed as stimulated is to	overstimulated	______	0.09	0	{'______': 0.09, '': 0.04, '_____': 0.04, '__': 0.04}	18	0.0130615	0.0772705	0.999821	key	key|target	0.7	TRUE	TRUE	TRUE	target	{'overstimulated': 0.7}
Morphological Modifiers	comparative	tight is to tighter as weak is to	weaker		0.09	0	{'': 0.06, ':': 0.06, '______': 0.05, 'what': 0.05}	7	0.034668	0.0541992	0.99993	key	key|target	0.7	TRUE	TRUE	TRUE	target	{'weaker': 0.7}
Morphological Modifiers	adj+ness_reg	preparedness is to prepared as righteousness is to	righteous	sin	0.09	0	{'sin': 0.09, '______': 0.06, 'righteousness': 0.04, '__': 0.04, 'un': 0.03}	28	0.00671387	0.0806885	0.999721	key	key|target	0.7	TRUE	TRUE	TRUE	target	{'righteous': 0.7}
Semantic Hierarchies	hypernyms_misc	dishwasher is to appliance as grapefruit is to	citrus	fruit	0.09	0	{'fruit': 0.09, '': 0.04, '?': 0.04, ':': 0.04}	24	0.0111084	0.081665	0.999761	key	key|target	0.7	TRUE	TRUE	TRUE	target	{'citrus': 0.7}
Semantic Hierarchies	hyponyms_misc	hamburger is to burger as lemon is to	citrus	lemon	0.09	0	{'lemon': 0.09, '___': 0.06, 'what': 0.04, '': 0.03, '"': 0.03}	6	0.0300293	0.0568848	0.99994	key	key|target	0.7	TRUE	TRUE	TRUE	target	{'citrus': 0.7}
Semantic Relations	animal_sound	beetle is to drone as songbird is to	chirrup	______	0.09	0	{'______': 0.09, 'sing': 0.06, '_____': 0.06, '': 0.05, '__': 0.03}	7	0.0249023	0.0620117	0.99993	key	key|target	0.7	TRUE	TRUE	TRUE	target	{'chirrup': 0.7}
Semantic Relations	animal_sound	oink is to pig as chirrup is to	songbird		0.09	0	{'': 0.06, '?': 0.04, ':': 0.05}	349	0.000105381	0.0858321	0.996522	key	key|target	0.7	TRUE	TRUE	TRUE	target	{'songbird': 0.7}
Semantic Relations	male_female	grandfather is to grandmother as valet is to	maid	but	0.09	0	{'but': 0.09, 'what': 0.05, 'chauff': 0.04, '__': 0.04, '______': 0.03}	13	0.0134277	0.0739746	0.99987	key	key|target	0.7	TRUE	TRUE	TRUE	target	{'maid': 0.7}
Morphological Modifiers	verb+able_reg	contain is to containable as write is to	writeable		0.08	0	{'': 0.05, '?': 0.04, '"': 0.04}	9	0.0219727	0.0546875	0.99991	key	key|target	0.7	TRUE	TRUE	TRUE	target	{'writeable': 0.7}
Morphological Modifiers	over+adj_reg	done is to overdone as excited is to	overexcited	______	0.08	0	{'______': 0.08, '_____': 0.03, '': 0.03, ':': 0.03, '__': 0.03}	34	0.00521851	0.0768127	0.999661	key	key|target	0.7	TRUE	TRUE	TRUE	target	{'overexcited': 0.7}
Morphological Modifiers	over+adj_reg	booked is to overbooked as written is to	overwritten	written	0.08	0	{'written': 0.08, 'typed': 0.07, '______': 0.06, '?': 0.05, '': 0.04}	51	0.00263977	0.0769501	0.999492	key	key|target	0.7	TRUE	TRUE	TRUE	target	{'overwritten': 0.7}
Morphological Modifiers	verb+able_reg	adapt is to adaptable as perform is to	performable		0.08	0	{'': 0.07, '______': 0.08, '?': 0.06, ':': 0.05}	30	0.00479126	0.0801697	0.999701	key	key|target	0.7	TRUE	TRUE	TRUE	target	{'performable': 0.7}
Semantic Relations	animal_sound	bray is to alpaca as roar is to	lion	?	0.08	0	{'?': 0.08, '': 0.05, '_____': 0.05, ':': 0.05}	5	0.0341797	0.0429688	0.99995	key	key|target	0.7	TRUE	TRUE	TRUE	target	{'lion': 0.7}
Semantic Relations	animal_shelter	fox is to den as gorilla is to	grove		0.08	0	{'': 0.05, '?': 0.06, 'what': 0.06, 'a': 0.04}	3705	2.66731e-06	0.0849583	0.96308	key	key|target	0.7	TRUE	TRUE	TRUE	target	{'grove': 0.7}
Semantic Relations	animal_sound	howl is to coyote as chirrup is to	songbird		0.08	0	{'': 0.07, ':': 0.05, '?': 0.05, '______': 0.04}	252	0.000200272	0.0779247	0.997489	key	key|target	0.7	TRUE	TRUE	TRUE	target	{'songbird': 0.7}
Semantic Relations	antonyms_binary	last is to first as southwest is to	southeast		0.08	0	{'': 0.08, '______': 0.05, 'northeast': 0.04, 'north': 0.04, '?': 0.04}	19	0.013855	0.0657349	0.999811	key	key|target	0.7	TRUE	TRUE	TRUE	target	{'southeast': 0.7}
Semantic Relations	male_female	batman is to batwoman as nephew is to	niece	"	0.08	0	{'"': 0.08, 'what': 0.05, '?': 0.04, ':': 0.04, '______': 0.04}	12	0.0175781	0.0664062	0.99988	key	key|target	0.7	TRUE	TRUE	TRUE	target	{'niece': 0.7}
Verbal & Grammatical Forms	noun_plural_irreg	abilities is to ability as bases is to	basis	base	0.08	0	{'base': 0.08, 'acid': 0.08, 'bases': 0.04, '______': 0.04, 'acids': 0.03}	6	0.0308838	0.0531006	0.99994	key	key|target	0.7	TRUE	TRUE	TRUE	target	{'basis': 0.7}
Morphological Modifiers	noun+less_reg	sleeve is to sleeveless as speech is to	speechless	______	0.07	0	{'______': 0.07, '____': 0.06, '__': 0.04, '_____': 0.04, '"': 0.03}	8	0.0197754	0.0490723	0.99992	key	key|target	0.7	TRUE	TRUE	TRUE	target	{'speechless': 0.7}
Morphological Modifiers	verb+able_reg	accept is to acceptable as write is to	writeable	:	0.07	0	{':': 0.07, '': 0.04, '?': 0.05}	37	0.00512695	0.0681152	0.999631	key	key|target	0.7	TRUE	TRUE	TRUE	target	{'writeable': 0.7}
Morphological Modifiers	comparative	deep is to deeper as quick is to	quicker		0.07	0	{'': 0.04, 'A': 0.06, '?': 0.05, 'slower': 0.05}	5	0.0427246	0.0231934	0.99995	key	key|target	0.7	TRUE	TRUE	TRUE	target	{'quicker': 0.7}
Morphological Modifiers	adj+ly_reg	differently is to different as famously is to	famous	______	0.07	0	{'______': 0.07, '_____': 0.05, 'famously': 0.05, '': 0.04, '"': 0.04}	8	0.026001	0.0447998	0.99992	key	key|target	0.7	TRUE	TRUE	TRUE	target	{'famous': 0.7}
Semantic Hierarchies	hypernyms_misc	dessert is to cake as jar is to	vase	"	0.07	0	{'"': 0.07, '____': 0.06, '______': 0.05, 'what': 0.05, '___': 0.04}	385	9.34601e-05	0.0672894	0.996164	key	key|target	0.7	TRUE	TRUE	TRUE	target	{'vase': 0.7}
Semantic Relations	animal_sound	hound is to bark as moose is to	bellow	______	0.07	0	{'______': 0.07, 'roar': 0.05, 'what': 0.04, '_____': 0.04, '': 0.03}	83	0.00148773	0.0678482	0.999173	key	key|target	0.7	TRUE	TRUE	TRUE	target	{'bellow': 0.7}
Semantic Relations	antonyms_binary	drop is to lift as inbound is to	outbound		0.07	0	{'': 0.04, '______': 0.07, '__': 0.03, '_': 0.03}	52	0.00370789	0.0661163	0.999482	key	key|target	0.7	TRUE	TRUE	TRUE	target	{'outbound': 0.7}
Semantic Relations	antonyms_binary	after is to before as proceed is to	retreat		0.07	0	{'': 0.03, '_____': 0.04, 'preced': 0.04, '______': 0.04}	93	0.00170898	0.0666504	0.999073	key	key|target	0.7	TRUE	TRUE	TRUE	target	{'retreat': 0.7}
Factual Knowledge	UK_city_county	cardiff is to glamorgan as dundee is to	lowlands	f	0.06	0	{'f': 0.06, '-': 0.05, '__': 0.05, 'what': 0.05}	67	0.00164032	0.0598831	0.999332	key	key|target	0.7	TRUE	TRUE	TRUE	target	{'lowlands': 0.7}
Semantic Hierarchies	hypernyms_misc	toiletry is to deodorant as food is to	pastry		0.06	0	{'': 0.06, '______': 0.04, 'what': 0.03, '"': 0.03, 'a': 0.03}	542	0.000116348	0.0601864	0.994599	key	key|target	0.7	TRUE	TRUE	TRUE	target	{'pastry': 0.7}
Semantic Relations	animal_sound	donkey is to bray as elk is to	bellow		0.06	0	{'': 0.04, '_____': 0.05, '______': 0.05, 'what': 0.05}	164	0.000471115	0.0610523	0.998366	key	key|target	0.7	TRUE	TRUE	TRUE	target	{'bellow': 0.7}
Semantic Relations	animal_sound	ferret is to dook as fox is to	howl	_____	0.06	0	{'_____': 0.06, 'bark': 0.05, '__': 0.05, '___': 0.05, 'a': 0.04}	35	0.00543213	0.0568237	0.999651	key	key|target	0.7	TRUE	TRUE	TRUE	target	{'howl': 0.7}
Semantic Relations	antonyms_gradable	fast is to slow as tasteless is to	tasty	"	0.06	0	{'"': 0.06, '______': 0.05, '': 0.05, 'delicious': 0.05, '?': 0.03}	9	0.0222168	0.0422363	0.99991	key	key|target	0.7	TRUE	TRUE	TRUE	target	{'tasty': 0.7}
Semantic Relations	antonyms_gradable	sweet is to sour as tasty is to	tasteless	"	0.06	0	{'"': 0.06, 'salty': 0.06, '______': 0.05, 'bitter': 0.04, '___': 0.03}	41	0.0043335	0.0596313	0.999591	key	key|target	0.7	TRUE	TRUE	TRUE	target	{'tasteless': 0.7}
Semantic Relations	antonyms_binary	alive is to dead as dismiss is to	employ		0.06	0	{'': 0.04, '______': 0.05, '____': 0.05, '?': 0.04}	263	0.000335693	0.0597229	0.997379	key	key|target	0.7	TRUE	TRUE	TRUE	target	{'employ': 0.7}
Semantic Relations	animal_sound	cricket is to chirp as moose is to	bellow	______	0.05	0	{'______': 0.05, '_____': 0.04, 'what': 0.04, '': 0.04, '"': 0.04}	164	0.000564575	0.0502167	0.998366	key	key|target	0.7	TRUE	TRUE	TRUE	target	{'bellow': 0.7}
Verbal & Grammatical Forms	noun_plural_irreg	species is to species as university is to	universities	university	0.3	0	{'university': 0.3, 'college': 0.11, 'school': 0.06, 'education': 0.04, 'institution': 0.03}	6	0.0159912	0.28479	0.99994	example_value	example_value|target	0.7	TRUE	TRUE	TRUE	target	{'universities': 0.7}
Factual Knowledge	UK_city_county	derby is to derbyshire as leicester is to	midlands	le	0.79	0	{'le': 0.79, 'what': 0.02, 'not': 0.02, 'which': 0.02, '?': 0.01}	23258	1.02445e-08	0.785156	0.768236	key	key|target	0.69	TRUE	TRUE	TRUE	target	{'midlands': 0.69}
Morphological Modifiers	verb+ment_irreg	appoint is to appointment as disagree is to	disagreement	agreement	0.67	0	{'agreement': 0.67, 'agree': 0.23, 'ag': 0.01, 'agreed': 0.01, '': 0.01}	22	0.000888824	0.66708	0.999781	key	key|target	0.69	TRUE	TRUE	TRUE	target	{'disagreement': 0.69}
Semantic Relations	antonyms_binary	first is to last as inverse is to	reverse	direct	0.61	0	{'direct': 0.61, 'inverse': 0.06, 'product': 0.02, 'division': 0.02, 'reciprocal': 0.02}	9	0.00558472	0.599884	0.99991	key	key|target	0.69	TRUE	TRUE	TRUE	target	{'reverse': 0.69}
Morphological Modifiers	re+verb_reg	submit is to resubmit as tell is to	retell	tell	0.54	0	{'tell': 0.54, 'say': 0.05, 'tale': 0.03, 'talk': 0.02, 'to': 0.02}	9	0.00811768	0.527039	0.99991	key	key|target	0.69	TRUE	TRUE	TRUE	target	{'retell': 0.69}
Morphological Modifiers	re+verb_reg	define is to redefine as interpret is to	reinterpret	interpret	0.53	0	{'interpret': 0.53, 'understand': 0.11, 'translate': 0.09, 'explain': 0.02, 'constr': 0.01}	23	0.00238037	0.52887	0.999771	key	key|target	0.69	TRUE	TRUE	TRUE	target	{'reinterpret': 0.69}
Morphological Modifiers	re+verb_reg	assess is to reassess as develop is to	redevelop	develop	0.52	0	{'develop': 0.52, 'evolve': 0.09, 'development': 0.02, '______': 0.02, 'developing': 0.02}	34	0.00182343	0.521614	0.999661	key	key|target	0.69	TRUE	TRUE	TRUE	target	{'redevelop': 0.69}
Morphological Modifiers	re+verb_reg	examine is to reexamine as grow is to	regrow	grow	0.51	0	{'grow': 0.51, 'growth': 0.05, 'shrink': 0.03, 'develop': 0.02, '______': 0.01}	15	0.00726318	0.500549	0.999851	key	key|target	0.69	TRUE	TRUE	TRUE	target	{'regrow': 0.69}
Morphological Modifiers	re+verb_reg	interpret is to reinterpret as introduce is to	reintroduce	introduce	0.5	0	{'introduce': 0.5, 'bring': 0.03, 'present': 0.03, 'produce': 0.02, 'enter': 0.02}	90	0.000774384	0.499226	0.999103	key	key|target	0.69	TRUE	TRUE	TRUE	target	{'reintroduce': 0.69}
Semantic Relations	antonyms_binary	rise is to fall as upward is to	outward	downward	0.48	0	{'downward': 0.48, 'down': 0.18, '"': 0.02, '______': 0.02, '': 0.01}	49	0.0013504	0.481071	0.999512	key	key|target	0.69	TRUE	TRUE	TRUE	target	{'outward': 0.69}
Morphological Modifiers	re+verb_reg	reapply is to apply as redeem is to	deem	redeem	0.42	0	{'redeem': 0.42, 'deliver': 0.05, 'ransom': 0.03, 'buy': 0.03, 'save': 0.02}	143	0.00044632	0.417522	0.998575	key	key|target	0.69	TRUE	TRUE	TRUE	target	{'deem': 0.69}
Verbal & Grammatical Forms	noun_plural_irreg	analyses is to analysis as women is to	woman	men	0.4	0	{'men': 0.4, 'women': 0.08, 'man': 0.05, '______': 0.04, 'people': 0.01}	18	0.00448608	0.399811	0.999821	key	key|target	0.69	TRUE	TRUE	TRUE	target	{'woman': 0.69}
Semantic Relations	animal_sound	elk is to bellow as wasp is to	buzz	sting	0.39	0	{'sting': 0.39, '__': 0.07, '______': 0.06, '': 0.03, '_____': 0.03}	5	0.0250244	0.365601	0.99995	key	key|target	0.69	TRUE	TRUE	TRUE	target	{'buzz': 0.69}
Factual Knowledge	capital_world	Khartoum is to Sudan as Nassau is to	bahamas	the	0.38	0	{'the': 0.38, 'The': 0.13, '______': 0.06, '__': 0.05, ':': 0.05}	5	0.0419922	0.333008	0.99995	key	key|target	0.69	TRUE	TRUE	TRUE	target	{'bahamas': 0.69}
Semantic Relations	male_female	hero is to heroine as tiger is to	tigress	lion	0.36	0	{'lion': 0.36, '______': 0.07, 'tiger': 0.07, 'what': 0.04, '_____': 0.04}	199	0.000227928	0.363053	0.998017	key	key|target	0.69	TRUE	TRUE	TRUE	target	{'tigress': 0.69}
Semantic Relations	male_female	sculptress is to sculptor as stepmother is to	stepfather	mother	0.36	0	{'mother': 0.36, 'father': 0.05, '': 0.04, ':': 0.03}	19	0.00830078	0.35498	0.999811	key	key|target	0.69	TRUE	TRUE	TRUE	target	{'stepfather': 0.69}
Factual Knowledge	capital_world	Belarus is to Minsk as Norway is to	oslo	?	0.35	0	{'?': 0.05, ':': 0.05, '______': 0.05}	9	0.0270996	0.324463	0.99991	key	key|target	0.69	TRUE	TRUE	TRUE	target	{'oslo': 0.69}
Morphological Modifiers	over+adj_reg	heard is to overheard as sized is to	oversized	sized	0.33	0	{'sized': 0.33, '______': 0.04, 'siz': 0.04, 'size': 0.04, 'sizes': 0.03}	23	0.00646973	0.325562	0.999771	key	key|target	0.69	TRUE	TRUE	TRUE	target	{'oversized': 0.69}
Semantic Relations	animal_shelter	fish is to sea as pig is to	sty	land	0.32	0	{'land': 0.32, 'farm': 0.12, '_____': 0.07, 'ground': 0.04, '______': 0.02}	45	0.00219727	0.314209	0.999552	key	key|target	0.69	TRUE	TRUE	TRUE	target	{'sty': 0.69}
Factual Knowledge	name_nationality	hume is to Scottish as mozart is to	german	Austrian	0.31	0	{'Austrian': 0.31, 'Austria': 0.1, 'a': 0.1, 'aust': 0.07, 'vi': 0.04}	5	0.0373535	0.2771	0.99995	key	key|target	0.69	TRUE	TRUE	TRUE	target	{'german': 0.69}
Morphological Modifiers	adj+ness_reg	careful is to carefulness as creative is to	creativeness	creativity	0.3	0	{'creativity': 0.3, '______': 0.05, '"': 0.04, '': 0.03}	6	0.0290527	0.273682	0.99994	key	key|target	0.69	TRUE	TRUE	TRUE	target	{'creativeness': 0.69}
Morphological Modifiers	superlative	old is to oldest as fast is to	fastest	slow	0.28	0	{'slow': 0.28, '?': 0.04, ':': 0.04}	6	0.0290527	0.246338	0.99994	key	key|target	0.69	TRUE	TRUE	TRUE	target	{'fastest': 0.69}
Semantic Relations	animal_shelter	tiger is to den as woodchuck is to	hole	bur	0.23	0	{'bur': 0.23, '?': 0.07, '': 0.04}	19	0.0100708	0.218445	0.999811	key	key|target	0.69	TRUE	TRUE	TRUE	target	{'hole': 0.69}
Verbal & Grammatical Forms	noun_plural_irreg	energies is to energy as varieties is to	variety	species	0.23	0	{'species': 0.23, 'mathematics': 0.06, 'number': 0.03, 'numbers': 0.03, 'food': 0.02}	12	0.0129395	0.216553	0.99988	key	key|target	0.69	TRUE	TRUE	TRUE	target	{'variety': 0.69}
Morphological Modifiers	over+adj_reg	compensated is to overcompensated as inflated is to	overinflated	def	0.22	0	{'def': 0.22, '______': 0.05, '?': 0.05, '__': 0.05, 'what': 0.05}	25	0.00656128	0.210236	0.999751	key	key|target	0.69	TRUE	TRUE	TRUE	target	{'overinflated': 0.69}
Morphological Modifiers	re+verb_reg	invest is to reinvest as submit is to	resubmit	submit	0.22	0	{'submit': 0.22, '__': 0.05, 'send': 0.03, '______': 0.03, 'resign': 0.02}	13	0.00695801	0.209839	0.99987	key	key|target	0.69	TRUE	TRUE	TRUE	target	{'resubmit': 0.69}
Semantic Relations	animal_sound	elk is to bellow as toad is to	ribbit	cro	0.22	0	{'cro': 0.22, '______': 0.05, '': 0.03, '_____': 0.03}	6	0.0274658	0.189331	0.99994	key	key|target	0.69	TRUE	TRUE	TRUE	target	{'ribbit': 0.69}
Morphological Modifiers	adj+ly_reg	similarly is to similar as virtually is to	virtual	virtually	0.21	0	{'virtually': 0.21, '______': 0.08, 'nearly': 0.03, 'actually': 0.03, 'practically': 0.03}	35	0.00442505	0.208466	0.999651	key	key|target	0.69	TRUE	TRUE	TRUE	target	{'virtual': 0.69}
Semantic Relations	male_female	husband is to wife as tiger is to	tigress	lion	0.21	0	{'lion': 0.21, 'tiger': 0.11, 'what': 0.07, '______': 0.03, '__': 0.03}	340	0.000137329	0.211777	0.996612	key	key|target	0.69	TRUE	TRUE	TRUE	target	{'tigress': 0.69}
Morphological Modifiers	adj_superlative	dense is to densest as risky is to	riskiest	______	0.2	0	{'______': 0.2, 'safe': 0.07, '__': 0.06, '_____': 0.06, '____': 0.04}	11	0.0150146	0.180298	0.99989	key	key|target	0.69	TRUE	TRUE	TRUE	target	{'riskiest': 0.69}
Verbal & Grammatical Forms	adjective_to_adverb	efficiently is to efficient as obviously is to	obvious	obviously	0.2	0	{'obviously': 0.2, '______': 0.09, 'clearly': 0.05, '__': 0.05, 'evidently': 0.04}	5	0.0393066	0.159912	0.99995	key	key|target	0.69	TRUE	TRUE	TRUE	target	{'obvious': 0.69}
Verbal & Grammatical Forms	noun_plural_irreg	abilities is to ability as wives is to	wife	women	0.2	0	{'women': 0.2, 'husbands': 0.19, '______': 0.07, 'marriage': 0.06, 'wives': 0.03}	24	0.00300598	0.195236	0.999761	key	key|target	0.69	TRUE	TRUE	TRUE	target	{'wife': 0.69}
Verbal & Grammatical Forms	plural_verbs	eat is to eats as provide is to	provides	?	0.19	0	{'?': 0.05, '': 0.04, ':': 0.05}	18	0.0108032	0.180603	0.999821	key	key|target	0.69	TRUE	TRUE	TRUE	target	{'provides': 0.69}
Verbal & Grammatical Forms	noun_plural_irreg	authority is to authorities as life is to	lives	living	0.19	0	{'living': 0.19, 'the': 0.18, 'life': 0.13, 'God': 0.06, 'death': 0.05}	6	0.0192871	0.175049	0.99994	key	key|target	0.69	TRUE	TRUE	TRUE	target	{'lives': 0.69}
Morphological Modifiers	re+verb_reg	assure is to reassure as distribute is to	redistribute	distribute	0.18	0	{'distribute': 0.18, '?': 0.08, '': 0.06, '______': 0.05, '__': 0.04}	11	0.0218506	0.160767	0.99989	key	key|target	0.69	TRUE	TRUE	TRUE	target	{'redistribute': 0.69}
Semantic Relations	antonyms_binary	off is to on as proceed is to	retreat		0.18	0	{'': 0.02, '?': 0.04, ':': 0.03}	54	0.00292969	0.177734	0.999462	key	key|target	0.69	TRUE	TRUE	TRUE	target	{'retreat': 0.69}
Factual Knowledge	capital_world	Eritrea is to Asmara as Thailand is to	bangkok	?	0.17	0	{'?': 0.05, 'what': 0.1, '': 0.09, '______': 0.04}	6	0.03125	0.137695	0.99994	key	key|target	0.69	TRUE	TRUE	TRUE	target	{'bangkok': 0.69}
Morphological Modifiers	over+adj_reg	charged is to overcharged as subscribed is to	oversubscribed	subscribed	0.17	0	{'subscribed': 0.17, '______': 0.09, 'unsub': 0.08, ':': 0.06, '?': 0.03}	7	0.0288086	0.137207	0.99993	key	key|target	0.69	TRUE	TRUE	TRUE	target	{'oversubscribed': 0.69}
Verbal & Grammatical Forms	adjective_to_adverb	possibly is to possible as rarely is to	rare	frequently	0.17	0	{'frequently': 0.17, 'often': 0.12, 'frequent': 0.08, 'common': 0.08, '______': 0.05}	11	0.0142212	0.15863	0.99989	key	key|target	0.69	TRUE	TRUE	TRUE	target	{'rare': 0.69}
Verbal & Grammatical Forms	noun_plural_reg	colleges is to college as weeks is to	week	year	0.17	0	{'year': 0.17, 'years': 0.11, 'a': 0.06, 'months': 0.06, 'days': 0.05}	38	0.00363159	0.171173	0.999621	key	key|target	0.69	TRUE	TRUE	TRUE	target	{'week': 0.69}
Verbal & Grammatical Forms	verb_Ving_Ved	added is to adding as spent is to	spending	spent	0.17	0	{'spent': 0.17, '______': 0.07, '': 0.06, 'earned': 0.05, '__': 0.04}	14	0.0132446	0.15863	0.99986	key	key|target	0.69	TRUE	TRUE	TRUE	target	{'spending': 0.69}
Morphological Modifiers	over+adj_reg	played is to overplayed as stocked is to	overstocked	______	0.16	0	{'______': 0.16, 'depleted': 0.11, '_____': 0.06, '__': 0.04, '____': 0.04}	18	0.0088501	0.1474	0.999821	key	key|target	0.69	TRUE	TRUE	TRUE	target	{'overstocked': 0.69}
Semantic Relations	male_female	fisherwoman is to fisherman as madam is to	sir	?	0.16	0	{'?': 0.1, '_': 0.1, '': 0.04}	126	0.000354767	0.157848	0.998744	key	key|target	0.69	TRUE	TRUE	TRUE	target	{'sir': 0.69}
Verbal & Grammatical Forms	present_participle	coding is to code as swimming is to	swim	swimming	0.16	0	{'swimming': 0.16, 'flying': 0.14, 'water': 0.06, 'floating': 0.05, 'breathing': 0.04}	10	0.0145874	0.142639	0.9999	key	key|target	0.69	TRUE	TRUE	TRUE	target	{'swim': 0.69}
Semantic Hierarchies	hypernyms_misc	brooch is to jewelry as vase is to	jar		0.15	0	{'': 0.06, '?': 0.04, ':': 0.06}	354	8.34465e-05	0.146401	0.996472	key	key|target	0.69	TRUE	TRUE	TRUE	target	{'jar': 0.69}
Semantic Hierarchies	hypernyms_misc	bracelet is to jewelry as grapefruit is to	citrus	fruit	0.15	0	{'fruit': 0.15, ':': 0.05, 'what': 0.05, '__': 0.04}	5	0.0400391	0.108398	0.99995	key	key|target	0.69	TRUE	TRUE	TRUE	target	{'citrus': 0.69}
Verbal & Grammatical Forms	adjective_to_adverb	rapidly is to rapid as seriously is to	serious	seriously	0.15	0	{'seriously': 0.15, '': 0.08, 'slowly': 0.06, '______': 0.04, '?': 0.04}	9	0.0155029	0.130981	0.99991	key	key|target	0.69	TRUE	TRUE	TRUE	target	{'serious': 0.69}
Factual Knowledge	UK_city_county	hull is to yorkshire as leicester is to	midlands	not	0.14	0	{'not': 0.14, 'le': 0.13, 'the': 0.07, 'lin': 0.07, 'north': 0.03}	2626	4.32134e-06	0.139644	0.973832	key	key|target	0.69	TRUE	TRUE	TRUE	target	{'midlands': 0.69}
Factual Knowledge	country_capital	Finland is to Helsinki as Philippines is to	manila	?	0.14	0	{'?': 0.06, '______': 0.11, '': 0.06, '__': 0.05}	6	0.0400391	0.103516	0.99994	key	key|target	0.69	TRUE	TRUE	TRUE	target	{'manila': 0.69}
Factual Knowledge	capital_world	Finland is to Helsinki as Philippines is to	manila	?	0.14	0	{'?': 0.06, '______': 0.11, '': 0.06, '__': 0.05}	6	0.0400391	0.103516	0.99994	key	key|target	0.69	TRUE	TRUE	TRUE	target	{'manila': 0.69}
Semantic Hierarchies	hypernyms_misc	dessert is to cake as fuel is to	gasoline	car	0.14	0	{'car': 0.14, 'what': 0.08, '______': 0.07, '"': 0.06, '_____': 0.05}	29	0.00582886	0.135773	0.999711	key	key|target	0.69	TRUE	TRUE	TRUE	target	{'gasoline': 0.69}
Semantic Hierarchies	hypernyms_misc	pastry is to croissant as container is to	tub	?	0.14	0	{'?': 0.04, ':': 0.06, '': 0.06, 'what': 0.04}	175	0.000328064	0.141273	0.998256	key	key|target	0.69	TRUE	TRUE	TRUE	target	{'tub': 0.69}
Semantic Relations	animal_sound	leopard is to growl as whale is to	sing		0.14	0	{'': 0.08, '?': 0.12, '(': 0.06, ':': 0.05}	24	0.00866699	0.130981	0.999761	key	key|target	0.69	TRUE	TRUE	TRUE	target	{'sing': 0.69}
Semantic Relations	antonyms_binary	emerge is to submerge as away is to	toward	______	0.14	0	{'______': 0.14, '_____': 0.06, '____': 0.05, '': 0.04, '__': 0.04}	12	0.020752	0.11499	0.99988	key	key|target	0.69	TRUE	TRUE	TRUE	target	{'toward': 0.69}
Semantic Relations	male_female	actor is to actress as buck is to	doe	______	0.14	0	{'______': 0.14, '____': 0.11, '_____': 0.07, '__': 0.04, 'what': 0.03}	7	0.0284424	0.1073	0.99993	key	key|target	0.69	TRUE	TRUE	TRUE	target	{'doe': 0.69}
Factual Knowledge	UK_city_county	bradford is to yorkshire as leicester is to	midlands	le	0.13	0	{'le': 0.13, 'not': 0.09, '______': 0.05, 'lin': 0.04, "''": 0.03}	4162	1.58697e-06	0.134764	0.958526	key	key|target	0.69	TRUE	TRUE	TRUE	target	{'midlands': 0.69}
Factual Knowledge	capital_world	Uganda is to Kampala as Norway is to	oslo	?	0.13	0	{'?': 0.05, '______': 0.06, 'what': 0.06, ':': 0.05}	8	0.0290527	0.10083	0.99992	key	key|target	0.69	TRUE	TRUE	TRUE	target	{'oslo': 0.69}
Morphological Modifiers	adj_superlative	harsh is to harshest as hungry is to	hungriest	?	0.13	0	{'?': 0.06, '': 0.06, ':': 0.06}	22	0.00793457	0.119995	0.999781	key	key|target	0.69	TRUE	TRUE	TRUE	target	{'hungriest': 0.69}
Morphological Modifiers	over+adj_reg	compensated is to overcompensated as simplified is to	oversimplified	complex	0.13	0	{'complex': 0.13, '______': 0.09, 'complicated': 0.07, 'simplified': 0.06, '__': 0.04}	5	0.0336914	0.100098	0.99995	key	key|target	0.69	TRUE	TRUE	TRUE	target	{'oversimplified': 0.69}
Morphological Modifiers	over+adj_reg	overcrowded is to crowded as overwritten is to	written	______	0.13	0	{'______': 0.13, 'what': 0.06, '_____': 0.06, '____': 0.05, '___': 0.03}	14	0.0126953	0.115234	0.99986	key	key|target	0.69	TRUE	TRUE	TRUE	target	{'written': 0.69}
Semantic Hierarchies	hypernyms_misc	diary is to journal as tv is to	device	radio	0.13	0	{'radio': 0.13, 'movie': 0.1, 'cinema': 0.06, 'movies': 0.05, 'television': 0.04}	691	6.1512e-05	0.134704	0.993114	key	key|target	0.69	TRUE	TRUE	TRUE	target	{'device': 0.69}
Semantic Relations	animal_sound	bray is to mule as baa is to	sheep		0.13	0	{'': 0.06, '?': 0.04, ':': 0.04}	14	0.0153198	0.113586	0.99986	key	key|target	0.69	TRUE	TRUE	TRUE	target	{'sheep': 0.69}
Semantic Relations	animal_shelter	bear is to den as goldfish is to	pond	?	0.13	0	{'?': 0.13, 'bowl': 0.13, '': 0.08, 'tank': 0.07, 'what': 0.04}	43	0.00218201	0.128677	0.999572	key	key|target	0.69	TRUE	TRUE	TRUE	target	{'pond': 0.69}
Morphological Modifiers	noun+less_reg	collar is to collarless as wit is to	witless	______	0.12	0	{'______': 0.12, '': 0.04, '____': 0.04, '__': 0.04}	16	0.0101318	0.113403	0.999841	key	key|target	0.69	TRUE	TRUE	TRUE	target	{'witless': 0.69}
Morphological Modifiers	over+adj_reg	sold is to oversold as spent is to	overspent	______	0.12	0	{'______': 0.12, '__': 0.05, '"': 0.05, 'exhausted': 0.04, '_____': 0.04}	25	0.00720215	0.112427	0.999751	key	key|target	0.69	TRUE	TRUE	TRUE	target	{'overspent': 0.69}
Morphological Modifiers	un+adj_reg	authorized is to unauthorized as forgettable is to	unforgettable		0.12	0	{'': 0.06, ':': 0.11, '______': 0.06, '?': 0.06}	14	0.0168457	0.107178	0.99986	key	key|target	0.69	TRUE	TRUE	TRUE	target	{'unforgettable': 0.69}
Morphological Modifiers	comparative	loud is to louder as strong is to	stronger	?	0.12	0	{'?': 0.12, '': 0.05, ':': 0.05, 'a': 0.05}	10	0.0354004	0.088623	0.9999	key	key|target	0.69	TRUE	TRUE	TRUE	target	{'stronger': 0.69}
Semantic Hierarchies	hypernyms_misc	toiletry is to perfume as walk is to	sidewalk	run	0.12	0	{'run': 0.12, '?': 0.06, '': 0.04, 'stroll': 0.03, '______': 0.03}	151	0.000526428	0.123985	0.998495	key	key|target	0.69	TRUE	TRUE	TRUE	target	{'sidewalk': 0.69}
Semantic Hierarchies	hypernyms_misc	lemon is to citrus as sunscreen is to	cream	what	0.12	0	{'what': 0.12, 'beach': 0.06, '': 0.05, '______': 0.04, '?': 0.03}	404	0.000112534	0.116098	0.995974	key	key|target	0.69	TRUE	TRUE	TRUE	target	{'cream': 0.69}
Semantic Hierarchies	hypernyms_misc	blender is to appliance as sidewalk is to	walk	?	0.12	0	{'?': 0.04, 'pavement': 0.05, '': 0.04, 'road': 0.04}	19	0.012146	0.110413	0.999811	key	key|target	0.69	TRUE	TRUE	TRUE	target	{'walk': 0.69}
Semantic Relations	animal_sound	beetle is to drone as raven is to	caw	______	0.12	0	{'______': 0.12, '_____': 0.07, '____': 0.05, '': 0.05, 'what': 0.05}	190	0.000295639	0.122751	0.998107	key	key|target	0.69	TRUE	TRUE	TRUE	target	{'caw': 0.69}
Semantic Relations	animal_shelter	crocodile is to river as raven is to	nest	sky	0.12	0	{'sky': 0.12, '': 0.05, 'what': 0.05, '?': 0.04}	58	0.00263977	0.120407	0.999422	key	key|target	0.69	TRUE	TRUE	TRUE	target	{'nest': 0.69}
Semantic Relations	animal_shelter	insect is to nest as seal is to	den	_____	0.12	0	{'_____': 0.12, '': 0.04, '______': 0.07, '____': 0.05}	82	0.0011673	0.114067	0.999183	key	key|target	0.69	TRUE	TRUE	TRUE	target	{'den': 0.69}
Semantic Relations	animal_sound	growl is to bear as neigh is to	horse	wh	0.12	0	{'wh': 0.12, 'br': 0.08, 'neigh': 0.07, '': 0.04}	14	0.0128174	0.108765	0.99986	key	key|target	0.69	TRUE	TRUE	TRUE	target	{'horse': 0.69}
Semantic Relations	animal_sound	sheep is to baa as whale is to	sing		0.12	0	{'': 0.07, '?': 0.05, '(': 0.04, '"': 0.03}	28	0.00717163	0.108551	0.999721	key	key|target	0.69	TRUE	TRUE	TRUE	target	{'sing': 0.69}
Factual Knowledge	capital_world	Bishkek is to Kyrgyzstan as Funafuti is to	tuvalu	?	0.11	0	{'?': 0.11, '': 0.08, '______': 0.08, '__': 0.07}	7	0.0495605	0.0588379	0.99993	key	key|target	0.69	TRUE	TRUE	TRUE	target	{'tuvalu': 0.69}
Morphological Modifiers	noun+less_reg	bone is to boneless as guile is to	guileless	?	0.11	0	{'?': 0.11, '______': 0.08, '': 0.07, 'what': 0.05}	6	0.034668	0.0717773	0.99994	key	key|target	0.69	TRUE	TRUE	TRUE	target	{'guileless': 0.69}
Semantic Hierarchies	hypernyms_misc	desk is to furniture as grapefruit is to	citrus	fruit	0.11	0	{'fruit': 0.11, '?': 0.07, ':': 0.06, '': 0.06}	19	0.0126343	0.0962524	0.999811	key	key|target	0.69	TRUE	TRUE	TRUE	target	{'citrus': 0.69}
Semantic Relations	animal_shelter	mouse is to nest as seal is to	den	_____	0.11	0	{'_____': 0.11, '__': 0.09, '______': 0.07, '': 0.06, '____': 0.06}	50	0.00280762	0.102661	0.999502	key	key|target	0.69	TRUE	TRUE	TRUE	target	{'den': 0.69}
Semantic Relations	opposite	clear is to unclear as aware is to	unaware	______	0.11	0	{'______': 0.11, 'aware': 0.1, '': 0.05, ':': 0.05, '_____': 0.04}	16	0.0127563	0.093689	0.999841	key	key|target	0.69	TRUE	TRUE	TRUE	target	{'unaware': 0.69}
Semantic Relations	animal_sound	ribbit is to toad as sing is to	whale	bird	0.11	0	{'bird': 0.11, '______': 0.06, 'what': 0.06, '_____': 0.05, '': 0.05}	129	0.000530243	0.113728	0.998715	key	key|target	0.69	TRUE	TRUE	TRUE	target	{'whale': 0.69}
Semantic Relations	antonyms_binary	in is to out as inverse is to	reverse	product	0.11	0	{'product': 0.11, '?': 0.07, 'quotient': 0.07, 'what': 0.07, 'multiply': 0.06}	132	0.000419617	0.108955	0.998685	key	key|target	0.69	TRUE	TRUE	TRUE	target	{'reverse': 0.69}
Morphological Modifiers	over+adj_reg	confident is to overconfident as subscribed is to	oversubscribed	______	0.1	0	{'______': 0.1, 'subscribed': 0.07, '?': 0.05, '__': 0.04, 'what': 0.04}	17	0.0147705	0.0819092	0.999831	key	key|target	0.69	TRUE	TRUE	TRUE	target	{'oversubscribed': 0.69}
Morphological Modifiers	over+adj_reg	overoptimistic is to optimistic as overwritten is to	written	:	0.1	0	{':': 0.08, '______': 0.09, '': 0.06}	5	0.0247803	0.0792236	0.99995	key	key|target	0.69	TRUE	TRUE	TRUE	target	{'written': 0.69}
Morphological Modifiers	over+adj_reg	overcharged is to charged as overzealous is to	zealous		0.1	0	{'': 0.09, ':': 0.09, '"': 0.06, '?': 0.06}	13	0.0139771	0.0831909	0.99987	key	key|target	0.69	TRUE	TRUE	TRUE	target	{'zealous': 0.69}
Morphological Modifiers	re+verb_reg	arrange is to rearrange as develop is to	redevelop	develop	0.1	0	{'develop': 0.1, 'evolve': 0.08, '': 0.04, 'grow': 0.06}	207	0.000243187	0.104249	0.997937	key	key|target	0.69	TRUE	TRUE	TRUE	target	{'redevelop': 0.69}
Semantic Hierarchies	hypernyms_misc	furniture is to desk as container is to	tub	?	0.1	0	{'?': 0.1, '': 0.05, 'box': 0.05, ':': 0.05, 'what': 0.03}	121	0.000846863	0.0968094	0.998794	key	key|target	0.69	TRUE	TRUE	TRUE	target	{'tub': 0.69}
Semantic Hierarchies	hypernyms_misc	croissant is to pastry as sunscreen is to	cream	what	0.1	0	{'what': 0.1, 'beach': 0.09, '______': 0.04, 'sun': 0.03, '...': 0.03}	165	0.000419617	0.0972366	0.998356	key	key|target	0.69	TRUE	TRUE	TRUE	target	{'cream': 0.69}
Semantic Hierarchies	hypernyms_misc	pie is to pastry as sidewalk is to	walk	pavement	0.1	0	{'pavement': 0.1, 'concrete': 0.1, 'cement': 0.09, 'street': 0.09, 'road': 0.08}	6	0.045166	0.0568848	0.99994	key	key|target	0.69	TRUE	TRUE	TRUE	target	{'walk': 0.69}
Semantic Hierarchies	hypernyms_misc	lotion is to toiletry as tv is to	device	?	0.1	0	{'?': 0.1, 'appliance': 0.1, 'entertainment': 0.07, '': 0.05, 'electronics': 0.04}	65	0.00169373	0.0998688	0.999352	key	key|target	0.69	TRUE	TRUE	TRUE	target	{'device': 0.69}
Semantic Relations	family	princess is to prince as niece is to	nephew	"	0.1	0	{'"': 0.1, ':': 0.07, 'uncle': 0.06, 'what': 0.05, '': 0.05}	17	0.0164795	0.081665	0.999831	key	key|target	0.69	TRUE	TRUE	TRUE	target	{'nephew': 0.69}
Semantic Relations	animal_sound	elk is to bellow as monkey is to	chatter		0.1	0	{'': 0.06, 'sc': 0.05, '______': 0.04, '_____': 0.04}	9	0.0229492	0.0732422	0.99991	key	key|target	0.69	TRUE	TRUE	TRUE	target	{'chatter': 0.69}
Semantic Relations	antonyms_binary	below is to above as dive is to	emerge	surface	0.1	0	{'surface': 0.1, 'soar': 0.08, '______': 0.06, 'ascend': 0.05, '': 0.05}	39	0.00396729	0.0980835	0.999611	key	key|target	0.69	TRUE	TRUE	TRUE	target	{'emerge': 0.69}
Verbal & Grammatical Forms	noun_plural_irreg	family is to families as majority is to	majorities	______	0.1	0	{'______': 0.1, 'minorities': 0.05, '?': 0.05, '': 0.04, 'what': 0.03}	7	0.0256348	0.0695801	0.99993	key	key|target	0.69	TRUE	TRUE	TRUE	target	{'majorities': 0.69}
Factual Knowledge	UK_city_county	crawley is to sussex as leicester is to	midlands	what	0.09	0	{'what': 0.09, 'not': 0.07, 'le': 0.06, '______': 0.06, '_____': 0.05}	4695	9.90927e-07	0.0893545	0.953215	key	key|target	0.69	TRUE	TRUE	TRUE	target	{'midlands': 0.69}
Factual Knowledge	UK_city_county	edinburgh is to lowlands as newport is to	gwent	_____	0.09	0	{'_____': 0.09, '______': 0.07, 'w': 0.05, '__': 0.05, '____': 0.04}	2174	6.4075e-06	0.0898373	0.978336	key	key|target	0.69	TRUE	TRUE	TRUE	target	{'gwent': 0.69}
Morphological Modifiers	over+adj_reg	stimulated is to overstimulated as stretched is to	overstretched	______	0.09	0	{'______': 0.09, 'what': 0.07, '': 0.05, 'stretched': 0.04, '?': 0.03}	25	0.00854492	0.0773926	0.999751	key	key|target	0.69	TRUE	TRUE	TRUE	target	{'overstretched': 0.69}
Morphological Modifiers	adj+ly_reg	environmentally is to environmental as strongly is to	strong	what	0.09	0	{'what': 0.09, '': 0.03, '______': 0.06, 'strongly': 0.04}	13	0.0135498	0.0748291	0.99987	key	key|target	0.69	TRUE	TRUE	TRUE	target	{'strong': 0.69}
Semantic Relations	animal_sound	howl is to fox as chirrup is to	songbird		0.09	0	{'': 0.07, '?': 0.06, ':': 0.05, '"': 0.03}	255	0.000211716	0.0852375	0.997459	key	key|target	0.69	TRUE	TRUE	TRUE	target	{'songbird': 0.69}
Semantic Relations	male_female	actor is to actress as mister is to	miss	_	0.09	0	{'_': 0.09, 'mistress': 0.08, 'what': 0.08, '______': 0.06, '____': 0.05}	7	0.0349121	0.057373	0.99993	key	key|target	0.69	TRUE	TRUE	TRUE	target	{'miss': 0.69}
Verbal & Grammatical Forms	noun_plural_reg	governments is to government as roles is to	role	actors	0.09	0	{'actors': 0.09, 'roles': 0.06, '______': 0.05, '__': 0.03, 'people': 0.03}	6	0.0214844	0.0688477	0.99994	key	key|target	0.69	TRUE	TRUE	TRUE	target	{'role': 0.69}
Factual Knowledge	UK_city_county	edinburgh is to lowlands as lincoln is to	lincolnshire	__	0.08	0	{'__': 0.08, '': 0.07, '_____': 0.06, '_': 0.05, '______': 0.04}	43	0.00357056	0.0726013	0.999572	key	key|target	0.69	TRUE	TRUE	TRUE	target	{'lincolnshire': 0.69}
Morphological Modifiers	verb+ment_irreg	align is to alignment as encourage is to	encouragement	______	0.08	0	{'______': 0.08, '__': 0.08, 'motivation': 0.04, '?': 0.03, '_': 0.03}	21	0.00872803	0.0737915	0.999791	key	key|target	0.69	TRUE	TRUE	TRUE	target	{'encouragement': 0.69}
Morphological Modifiers	verb+ment_irreg	excite is to excitement as reimburse is to	reimbursement	______	0.08	0	{'______': 0.08, '?': 0.06, '__': 0.06, '_': 0.05, '': 0.05}	8	0.0324707	0.0456543	0.99992	key	key|target	0.69	TRUE	TRUE	TRUE	target	{'reimbursement': 0.69}
Morphological Modifiers	adj+ness_reg	directed is to directedness as random is to	randomness	non	0.08	0	{'non': 0.08, 'purpose': 0.08, 'directed': 0.06, 'determin': 0.06, 'order': 0.05}	18	0.00714111	0.069519	0.999821	key	key|target	0.69	TRUE	TRUE	TRUE	target	{'randomness': 0.69}
Morphological Modifiers	adj+ness_reg	consciousness is to conscious as uniqueness is to	unique	common	0.08	0	{'common': 0.08, 'universal': 0.06, 'sam': 0.03, 'uniqueness': 0.03, 'identical': 0.03}	6	0.0161133	0.0654297	0.99994	key	key|target	0.69	TRUE	TRUE	TRUE	target	{'unique': 0.69}
Morphological Modifiers	verb+tion_irreg	computation is to compute as continuation is to	continue	call	0.08	0	{'call': 0.08, 'computation': 0.08, 'control': 0.07, 'return': 0.05, 'continuation': 0.05}	6	0.0249023	0.0566406	0.99994	key	key|target	0.69	TRUE	TRUE	TRUE	target	{'continue': 0.69}
Morphological Modifiers	noun+less_reg	arm is to armless as friction is to	frictionless	?	0.08	0	{'?': 0.05, '': 0.05, '______': 0.05}	6	0.0280762	0.0480957	0.99994	key	key|target	0.69	TRUE	TRUE	TRUE	target	{'frictionless': 0.69}
Morphological Modifiers	over+adj_reg	sold is to oversold as written is to	overwritten	written	0.08	0	{'written': 0.08, '______': 0.08, '"': 0.05, '_____': 0.04, '____': 0.03}	83	0.0014267	0.0815811	0.999173	key	key|target	0.69	TRUE	TRUE	TRUE	target	{'overwritten': 0.69}
Morphological Modifiers	verb+er_irreg	baker is to bake as organiser is to	organise	?	0.08	0	{'?': 0.04, '': 0.04, '______': 0.05}	5	0.0373535	0.041748	0.99995	key	key|target	0.69	TRUE	TRUE	TRUE	target	{'organise': 0.69}
Semantic Hierarchies	hypernyms_misc	hairpin is to pin as postcard is to	card	stamp	0.08	0	{'stamp': 0.08, 'post': 0.08, '______': 0.06, 'what': 0.04, 'picture': 0.04}	19	0.00970459	0.0718384	0.999811	key	key|target	0.69	TRUE	TRUE	TRUE	target	{'card': 0.69}
Semantic Hierarchies	hypernyms_misc	deodorant is to toiletry as tv is to	device	entertainment	0.08	0	{'entertainment': 0.08, 'appliance': 0.07, 'electronics': 0.06, '?': 0.03, 'electronic': 0.03}	107	0.00106049	0.0829239	0.998934	key	key|target	0.69	TRUE	TRUE	TRUE	target	{'device': 0.69}
Semantic Hierarchies	hypernyms_misc	jewelry is to necklace as walk is to	sidewalk	"	0.08	0	{'"': 0.08, 'what': 0.05, '': 0.04, 'run': 0.04, '?': 0.03}	87	0.00136566	0.0782242	0.999133	key	key|target	0.69	TRUE	TRUE	TRUE	target	{'sidewalk': 0.69}
Semantic Relations	animal_sound	crow is to caw as elk is to	bellow		0.08	0	{'': 0.05, '?': 0.06, ':': 0.05}	158	0.000347137	0.0846138	0.998426	key	key|target	0.69	TRUE	TRUE	TRUE	target	{'bellow': 0.69}
Semantic Relations	animal_shelter	crocodile is to river as mouse is to	nest		0.08	0	{'': 0.05, 'field': 0.06, '_____': 0.05, '______': 0.04}	24	0.00854492	0.0725098	0.999761	key	key|target	0.69	TRUE	TRUE	TRUE	target	{'nest': 0.69}
Semantic Relations	animal_sound	growl is to leopard as chirrup is to	songbird	cat	0.08	0	{'cat': 0.08, '': 0.04, '______': 0.04, ':': 0.04}	118	0.000976562	0.0839844	0.998824	key	key|target	0.69	TRUE	TRUE	TRUE	target	{'songbird': 0.69}
Verbal & Grammatical Forms	noun_plural_reg	colleges is to college as hours is to	hour	day	0.08	0	{'day': 0.08, '______': 0.06, 'days': 0.06, 'clock': 0.04, 'a': 0.04}	22	0.00854492	0.067627	0.999781	key	key|target	0.69	TRUE	TRUE	TRUE	target	{'hour': 0.69}
Semantic Hierarchies	hypernyms_misc	peach is to fruit as tv is to	device	tv	0.07	0	{'tv': 0.07, 'television': 0.05, 'entertainment': 0.04, 'screen': 0.04, 'what': 0.02}	210	0.000499725	0.0688362	0.997907	key	key|target	0.69	TRUE	TRUE	TRUE	target	{'device': 0.69}
Semantic Hierarchies	hypernyms_misc	cake is to dessert as notepad is to	pad	computer	0.07	0	{'computer': 0.07, 'office': 0.06, 'document': 0.04, 'paper': 0.04, 'software': 0.04}	113	0.000751495	0.0715141	0.998874	key	key|target	0.69	TRUE	TRUE	TRUE	target	{'pad': 0.69}
Semantic Relations	animal_sound	cat is to meow as chimpanzee is to	scream	_____	0.07	0	{'_____': 0.07, '______': 0.06, '': 0.06, '__': 0.04, 'what': 0.04}	36	0.00469971	0.0646362	0.999641	key	key|target	0.69	TRUE	TRUE	TRUE	target	{'scream': 0.69}
Semantic Relations	animal_sound	fox is to howl as whale is to	sing	______	0.07	0	{'______': 0.07, '_____': 0.07, '____': 0.05, '(': 0.05, '': 0.05}	5	0.0454102	0.0292969	0.99995	key	key|target	0.69	TRUE	TRUE	TRUE	target	{'sing': 0.69}
Semantic Relations	antonyms_binary	exit is to entrance as proceed is to	retreat		0.07	0	{'': 0.05, '__': 0.05, '______': 0.05, ':': 0.04}	49	0.00338745	0.0713196	0.999512	key	key|target	0.69	TRUE	TRUE	TRUE	target	{'retreat': 0.69}
Semantic Relations	male_female	actor is to actress as boar is to	sow	______	0.07	0	{'______': 0.07, '?': 0.07, '____': 0.07, '': 0.06}	12	0.0250244	0.0496826	0.99988	key	key|target	0.69	TRUE	TRUE	TRUE	target	{'sow': 0.69}
Morphological Modifiers	over+adj_reg	charged is to overcharged as zealous is to	overzealous		0.06	0	{'': 0.04, 'restrained': 0.06, ':': 0.05, '______': 0.04}	30	0.00497437	0.0594788	0.999701	key	key|target	0.69	TRUE	TRUE	TRUE	target	{'overzealous': 0.69}
Morphological Modifiers	over+adj_reg	overprotective is to protective as oversized is to	sized	:	0.06	0	{':': 0.04, 'small': 0.05, '"': 0.05, 'too': 0.04}	71	0.00230408	0.0570221	0.999292	key	key|target	0.69	TRUE	TRUE	TRUE	target	{'sized': 0.69}
Semantic Hierarchies	hypernyms_misc	citrus is to lemon as picture is to	photo	______	0.06	0	{'______': 0.06, '': 0.04, '"': 0.06, 'a': 0.05}	46	0.0038147	0.0520935	0.999542	key	key|target	0.69	TRUE	TRUE	TRUE	target	{'photo': 0.69}
Semantic Hierarchies	hypernyms_misc	notebook is to book as tv is to	device	tv	0.06	0	{'tv': 0.06, 'television': 0.06, 'what': 0.05, '____': 0.03, '______': 0.03}	493	8.4877e-05	0.0563116	0.995087	key	key|target	0.69	TRUE	TRUE	TRUE	target	{'device': 0.69}
Semantic Relations	animal_sound	cicada is to buzz as monkey is to	chatter	what	0.06	0	{'what': 0.06, '______': 0.06, '': 0.05, '_____': 0.04, 'climb': 0.04}	25	0.00772095	0.0567322	0.999751	key	key|target	0.69	TRUE	TRUE	TRUE	target	{'chatter': 0.69}
Semantic Relations	animal_shelter	crocodile is to river as snake is to	nest	forest	0.06	0	{'forest': 0.06, 'jungle': 0.05, '_____': 0.05, '?': 0.05, '': 0.04}	79	0.00170898	0.0549316	0.999213	key	key|target	0.69	TRUE	TRUE	TRUE	target	{'nest': 0.69}
Semantic Relations	animal_shelter	trout is to river as wasp is to	nest		0.06	0	{'': 0.04, '?': 0.06, '_____': 0.04, '______': 0.04}	8	0.0264893	0.0369873	0.99992	key	key|target	0.69	TRUE	TRUE	TRUE	target	{'nest': 0.69}
Semantic Relations	animal_sound	cricket is to chirp as gorilla is to	grunt	what	0.05	0	{'what': 0.05, '_____': 0.04, '': 0.04, 'roar': 0.04, '__': 0.04}	12	0.0195312	0.0302734	0.99988	key	key|target	0.69	TRUE	TRUE	TRUE	target	{'grunt': 0.69}
Semantic Relations	antonyms_binary	input is to output as proceed is to	retreat	go	0.05	0	{'go': 0.05, '?': 0.03, 'proceed': 0.03, '': 0.03, 'stop': 0.03}	26	0.00640869	0.0473022	0.999741	key	key|target	0.69	TRUE	TRUE	TRUE	target	{'retreat': 0.69}
Verbal & Grammatical Forms	noun_plural_irreg	bases is to basis as series is to	series	sequence	0.17	0	{'sequence': 0.17, '______': 0.09, 'sum': 0.08, '____': 0.04, '__': 0.03}	9	0.0195312	0.155273	0.99991	original	target	0.68	TRUE	TRUE	TRUE	target	{'series': 0.68}
Morphological Modifiers	re+verb_reg	deem is to redeem as define is to	redefine	define	0.84	0	{'define': 0.84, '__': 0.01, 'de': 0.01, '': 0.0, 'refine': 0.0}	54	0.000602722	0.835335	0.999462	key	key|target	0.68	TRUE	TRUE	TRUE	target	{'redefine': 0.68}
Semantic Relations	family	his is to her as son is to	daughter	mother	0.54	0	{'mother': 0.54, 'his': 0.17, 'a': 0.08, 'father': 0.06, 'her': 0.04}	19	0.0012207	0.537842	0.999811	key	key|target	0.68	TRUE	TRUE	TRUE	target	{'daughter': 0.68}
[truncated: 30,213 more rows]

## Sheet: num_stats
	count	mean	std	min	25%	50%	75%	max
next_token_softmax	31789	0.240791	0.200097	0.02	0.09	0.14	0.38	0.94
next_token_precision@5	31789	0	0	0	0	0	0	0
[truncated: 5 more rows]

## Sheet: precision_stats
	TRUE	FALSE
[truncated: 3 more rows]

[truncated: 7 more sheets: area_stats, domain_stats, unbunding_type_stats, extracted_factors_stats, generated_token_stats, next_token_precision@5_stats, best_item_type_stats]
