# Supplementary material
Source: ML conference proceedings conference paper supplement (https://openreview.net/forum?id=MSm0VFL9pq)

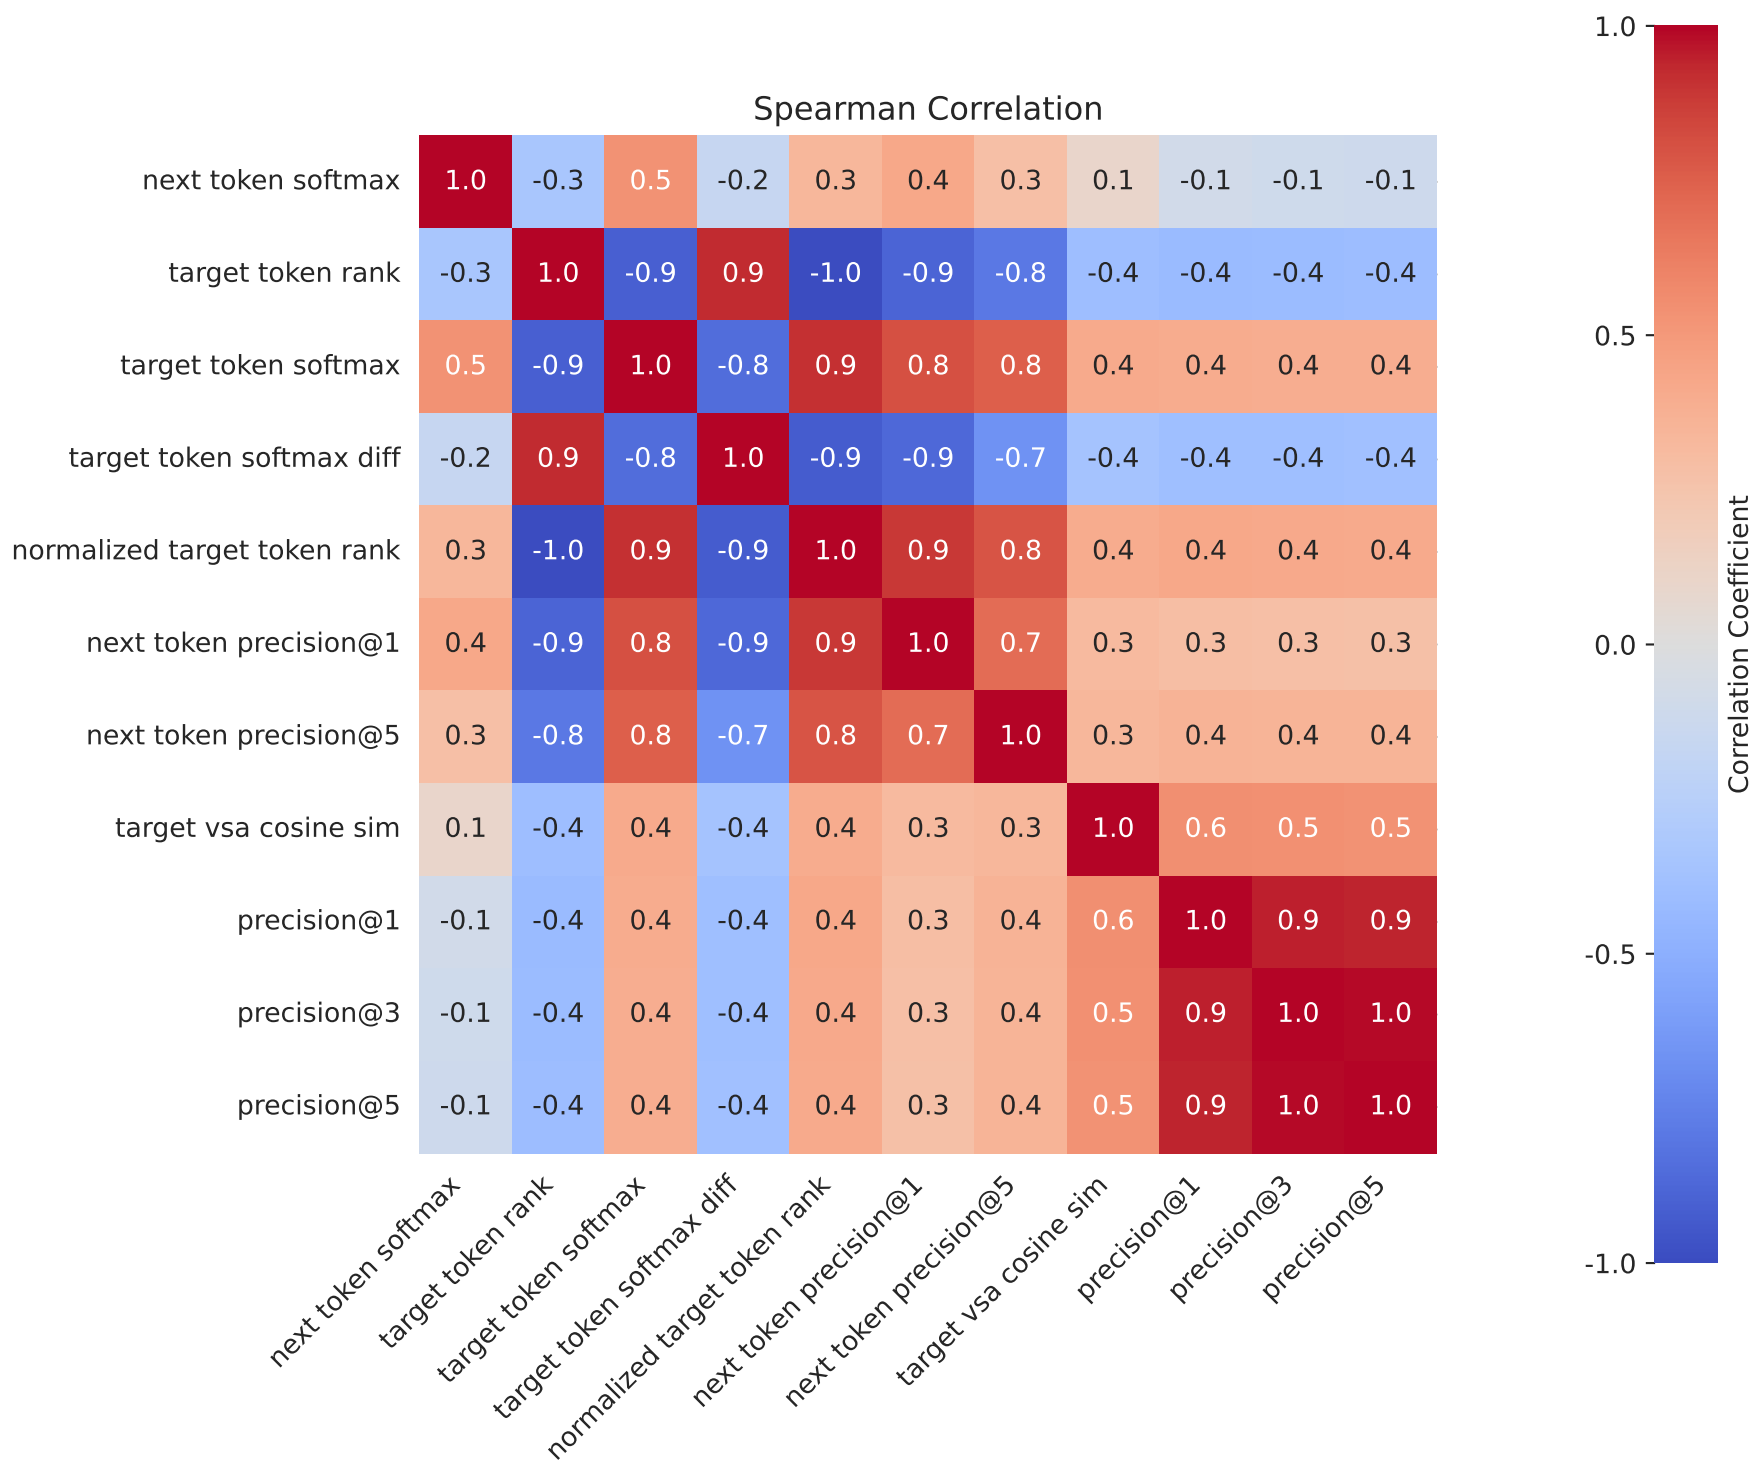

Supplement: supplementary_material [file correlation.pdf › code/outputs/OLMo-2/stats/correlation.pdf]
